# Supplementary material
Source: PubMed Central journal article supplement (PMC6276883)
Supplement: EMBJ-37-e99552-s001.pdf [file EMBJ-37-e99552-s001.pdf]

# Appendix

## Contents:

1. Appendix figure legends.
2. Appendix Fig S1
3. Appendix Fig S2
4. Appendix Fig S3
5. Appendix Fig S4
6. Appendix Fig S5
7. Appendix Fig S6
8. Appendix Table S1
9. Appendix Table S2
10. Appendix Table S3
11. Appendix Table S4
12. Appendix Table S5

## Appendix Figure Legends

### Appendix Fig S1. BES1/BZR1 family members have similar DNA binding patterns *in vitro*.

**A** Phylogenetic tree of the BES1/BZR1 family members. The tree also contains the BES1-like protein BAM8.

**B** Density plots for the presence of the DNA elements indicated (BRRE, G-box and PBE) in the strongest 1,000 peaks bound by the different BES1/BZR1 family members. DAP-Seq experiments were obtained from O'Malley et al. (2016). Coordinate 0 corresponds to the central position of the DNA interval. DNA intervals were scanned with the 'dna-pattern' tool in RSAT ([http://pedagogix-tagc.univ-mrs.fr/rsat/RSAT\\_portal.html](http://pedagogix-tagc.univ-mrs.fr/rsat/RSAT_portal.html)) for the DNA elements: BRRE, CACGTGYG, being Y, C or T; G, CACGTG; and PBE, CATGTG.

**C** Consensus sequences derived from the 200 bp sequences corresponding to the highest 1,000 peaks bound by the different BES1/BZR1 family members. Sequence logos were obtained from the DAP-Seq experiments with MEME (<http://meme-suite.org/tools/meme>).

### Appendix Fig S2. BES1 physically interacts with PIF4 through both the bHLH and C-terminal protein region, downstream the PEST domain.

**A** Yeast Two-Hybrid assays showing PIF4 and BES1 interaction. A schematic representation of the conserved domains of PIF4 and BES1, and the deletions generated to map the interacting domains is shown. Bait (BD) and prey (AD) constructs were co-transformed into yeast cells as indicated. Growth on selective SD-LWHA media indicates interaction. The BD and AD constructs were co-transformed with the empty pGADT7 or pGBKT7 vectors, to exclude an auto-activation effect. The PIF4del2 and del3 deletions, including the bHLH domain, bind the BES1 protein. Two domains in the BES1 protein are involved in PIF4 interaction: the N-terminal bHLH domain (binding is observed for BES1del3, but not BESdel1), and the C-terminal end of the protein (BES1del4).

**B** BiFC assays showing BES1 and PIF4 interaction. Nuclear YFP fluorescence is observed in *Nicotiana benthamiana* epidermal cells co-infiltrated with the PIF4-eYFP<sup>C</sup> and BES1-eYFP<sup>N</sup> constructs. These protein fusions were expressed with the eYFP<sup>N</sup> and eYFP<sup>C</sup> empty vectors as negative controls.

Chlorophyll panels show the auto-fluorescence of chloroplasts. Scale bars represent 20  $\mu\text{m}$  in the first panel and 100  $\mu\text{m}$  in the second and third panels.

**C** BiFC assays showing nuclear interaction of PIF4 and the BES1 bHLH domain (delN), as well as the C-terminal BES1 (del2) region. The delN deletion includes amino acid 1 to 98, while del2 includes amino acid 97 to 335. In red is shown the auto-fluorescence of chloroplasts. Scale bar represents 20  $\mu\text{m}$ .

**Appendix Fig S3. Transcript levels of PIF+BES-UP and BES-DOWN targets in the constitutively active *bes1-D* mutant.**

Analysis of the diurnal expression profile of PIF+BES-UP targets and genes involved in BR synthesis, in the Col-0 (black) and *bes1-D* (green) backgrounds. Samples were collected at the indicated time points and expression of the genes was analyzed by qRT-PCR. *PP2A* was used as an endogenous control for the qPCR. Error bars represent SD of three technical replicates. Dark periods are shown in grey. The experiment was performed twice with similar results.

**Appendix Fig S4. Transcript levels of PIF+BES-UP and BES-DOWN targets in the constitutively active *bzr1-1D* mutant.**

Analysis of the diurnal expression profile of PIF+BES-UP targets and genes involved in BR synthesis, in the Col-0 (black) and *bzr1-1D* (green) backgrounds. Samples were collected at the indicated time points and expression of the genes was analyzed by qRT-PCR. *PP2A* was used as an endogenous control for the qPCR. Error bars represent SD of two biological replicates. Dark periods are shown in grey.

**Appendix Fig S5. Stability of the two BES1 isoforms BES1-Long (BES1-L) and BES1-Short (BES1-S) during the day and PIF+BES-UP transcript levels in *bes1* and *bzr1* knock-out mutants.**

**A** Analysis of the diurnal expression profiles of PIF+BES-UP targets: *XTR7*, *PRE5*, and *IAA19* in Col-0, *bes1* and *bzr1* knock-out mutants (*bes1* KO and *bzr1* KO). Samples were collected at the indicated time points and gene expression was analyzed by qRT-PCR. *PP2A* was used as the endogenous

control. Error bars represent SD of three technical replicates. Dark periods are shown in grey.

**B** Six day-old *35S::BES1-L-GFP* (long isoform) and *35S::BES1-S-GFP* (short isoform) seedlings were collected at the indicated time points and protein abundance analyzed by western blot studies using an anti-GFP antibody. Lanes were loaded with 70  $\mu$ g of the total protein extract for BES1-L detection, and 30  $\mu$ g for detection of the BES1-S isoform. Hybridization with anti-RPT5 is included as a loading control.

**C** Analysis of *BES1-L* and *BES1-S* transcript levels in six day-old Col-0 seedlings. Samples were collected at the indicated time points and gene expression analyzed by qRT-PCR, using primers BES1-S-qPCR-F and BES1-S-qPCR-R (*BES1-S*); and BES1-L-qPCR-F and BES1-L-qPCR-R (*BES1-L*) as in Jiang et al. (2015). *PP2A* was used as endogenous control. Dark periods are shown in grey.

**D** Diurnal oscillation of the *BES1-GFP* transcript in 6 day-old *35S::BES1-GFP* plants. Seedlings were grown in short days and samples harvested at the indicated time points. Gene expression was analyzed by qRT-PCR, using primers qGFP-F and qGFP-R. *PP2A* was used as endogenous control. Error bars represent SD of three technical replicates. Shading indicates dark periods.

### **Appendix Fig S6. Thermomorphogenic hypocotyl elongation depends on PIFs activity and BRs.**

**A** Both PIFs function and increased BR levels are required for hypocotyl elongation in response to warm temperature. Seedlings were grown for two days at 22°C before transferring them to plates supplemented with 300 nM epi-brassinolide (BL) or 0.5  $\mu$ M brassinazole (BRZ), and then grown for 4 additional days at 22°C or 28°C.

**B** Box-plot showing the hypocotyl lengths of Col-0, *pif4pif5* and *pifq* seedlings grown for 4 days on half strength MS media (mock), or on media supplemented with eBL or BRZ. Boxes represent the 25-75% quartiles and the black line the median of distribution. Bars indicate the 1–25% (above) and 75–100% (below) quartiles.



**Appendix Table S1.** BES1 and BZR1-regulated genes identified in our microarray studies (Columns *bes1D\_Col* and *bes1Dpif45\_pif45*, GSE85211) and compiled from published expression data. Numbers in the first row indicate the publications from which the gene datasets have been extracted: 1. Goda *et al.*, 2008; 2. Goda *et al.*, 2004; 3. Nemhauser *et al.*, 2006; 4. Nemhauser *et al.*, 2004; 5. Vert *et al.*, 2005, 6. Oh *et al.*, 2012 and 7. Sun *et al.*, 2010. In the BES\_ALL column, 1 indicates upregulation and -1 indicates downregulation. Induced genes have been coloured in red and repressed genes in green, and an increasing colour intensity has been used according to the number of experiments where each gene was found to be regulated by BES1 or BZR1.

**Appendix Table S2.** PIF-regulated genes identified in our microarray studies (Columns *bes1D\_Col* and *bes1Dpif45\_pif45*, GSE85211) and compiled from published expression data. Numbers in the first row indicate the publications from which the gene datasets have been extracted: 1. Hornitschek *et al.*, 2012; 2. Leivar *et al.*, 2009; 3. Lorrain *et al.*, 2009; 4. Nozue *et al.*, 2011; 5. Oh *et al.*, 2012; 6. Shin *et al.*, 2009 and 7. Zhang *et al.*, 2013. In the PIF\_ALL column, 1 indicates upregulation and -1 indicates downregulation. Induced genes have been coloured in red and repressed genes in green, and an increasing colour intensity has been used according to the number of experiments where each gene was found to be PIF-regulated.

**Appendix Table S3.** BES1 and BZR1 target genes retrieved from published ChIP-ChIP and ChIP-seq experiments. Names in the first row correspond to the publications from which the datasets have been extracted: BES\_target: Yu *et al.*, 2011; BZR1\_target: Sun *et al.*, 2010; BESBZR\_target: BES1 or BZR1 target. Genes highlighted in pink were identified in both ChIP experiments.

**Appendix Table S4.** PIF target genes retrieved from published ChIP-ChIP and ChIP-seq experiments. PIF3, PIF4 and PIF5 target genes have been obtained from datasets published in Hornitschek *et al.*, 2012, Oh *et al.*, 2012 and Zhang *et al.*, 2013. Genes identified as direct targets of two or three PIFs have been highlighted in light and dark pink, respectively.

**Appendix Table S5.** List of primers used in this study.

# Appendix Fig S1

**A**

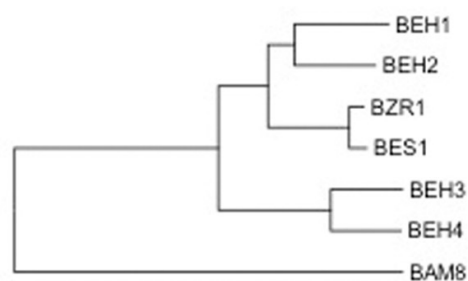

**B**

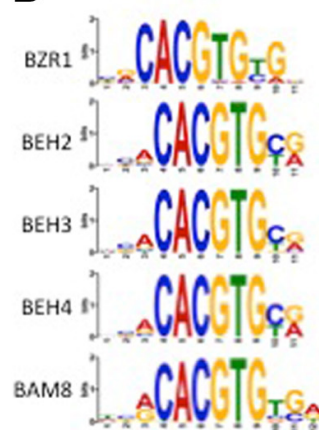

**C**

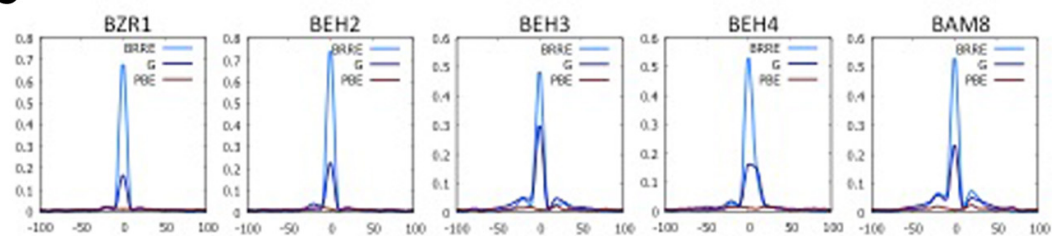

# Appendix Fig S2

**A**

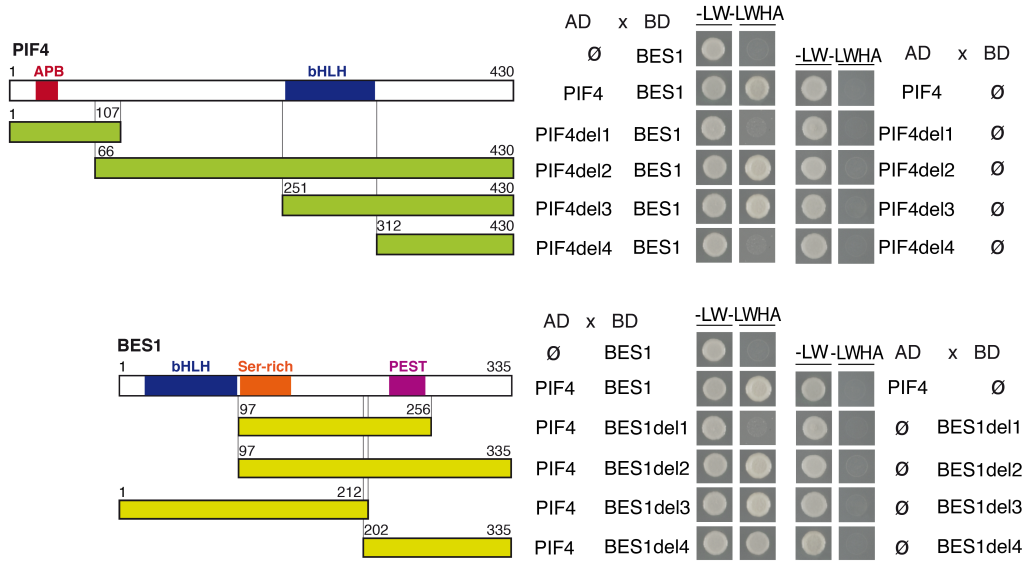

**B**

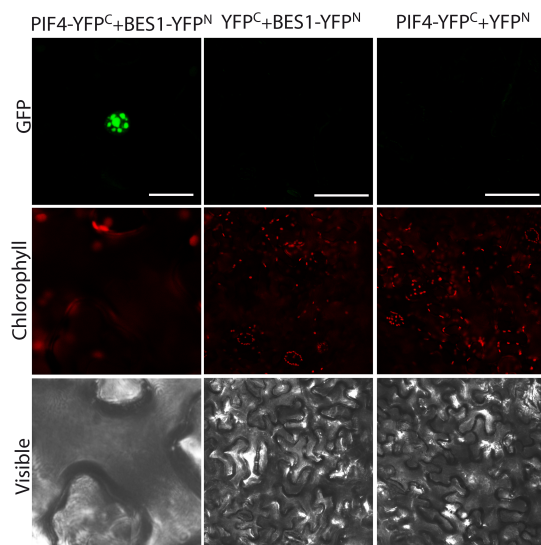

**C**

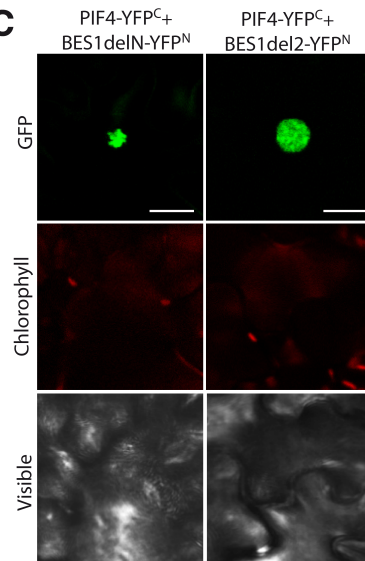

# Appendix Fig S3

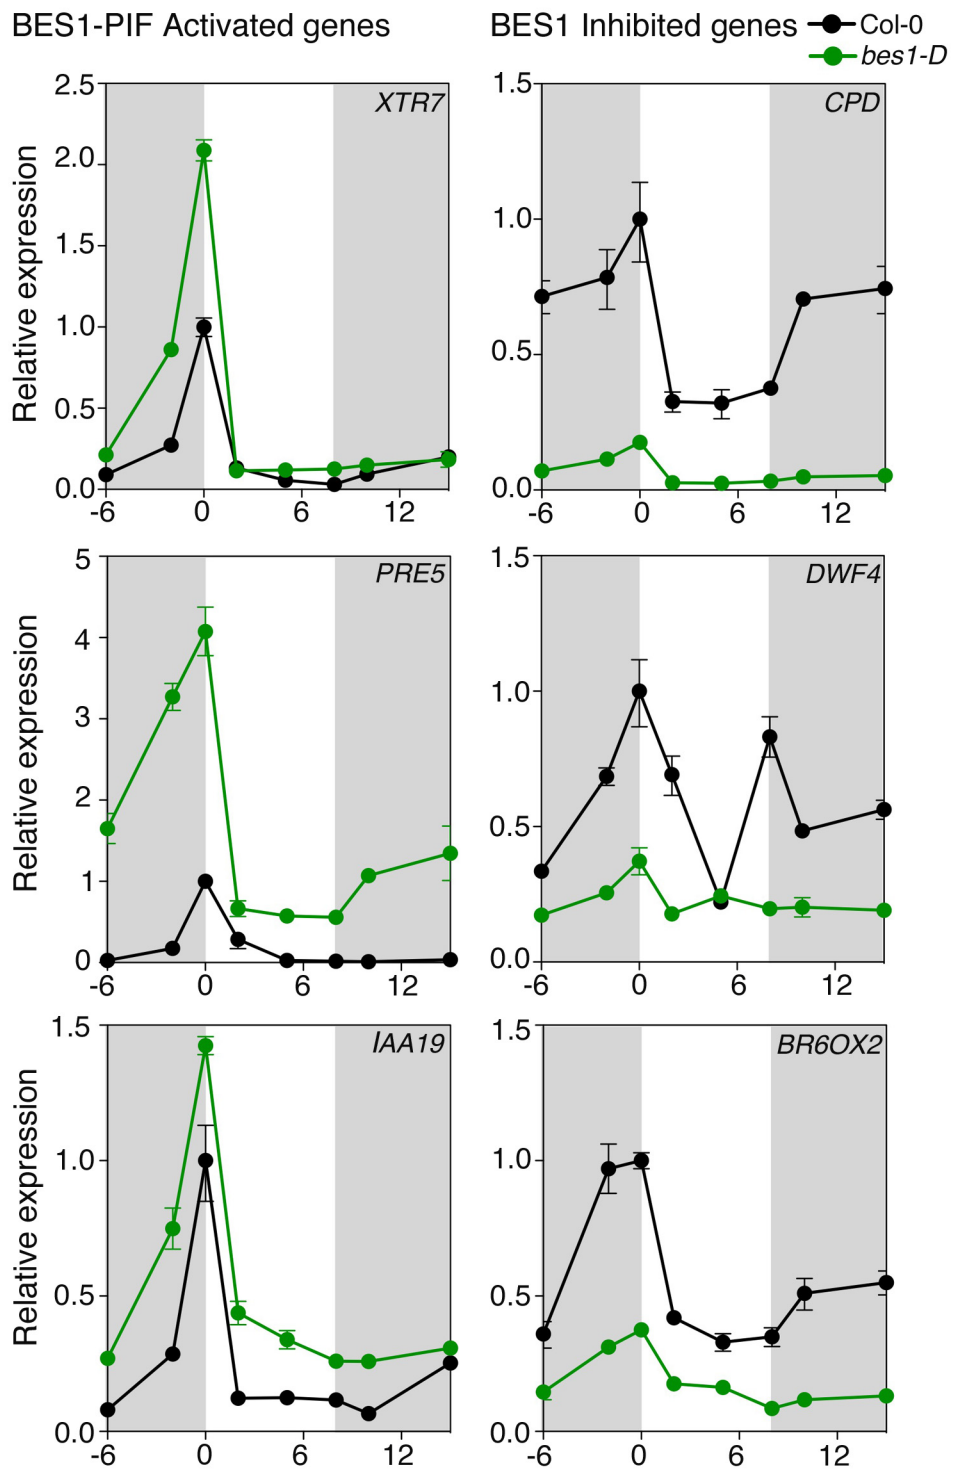

## Appendix Fig S4

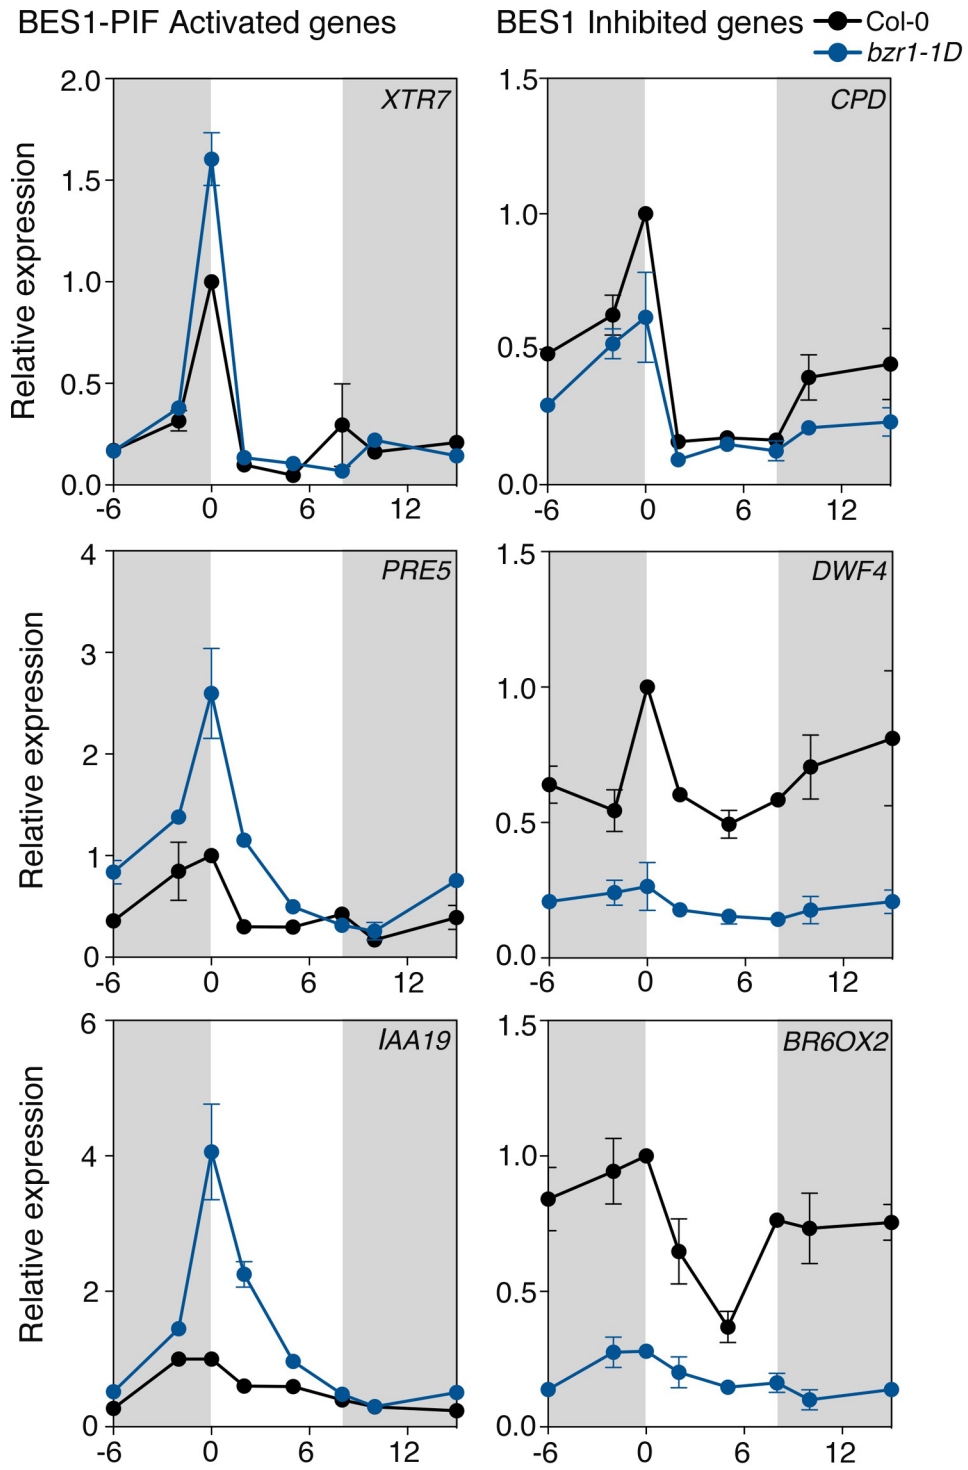

# Appendix Fig S5

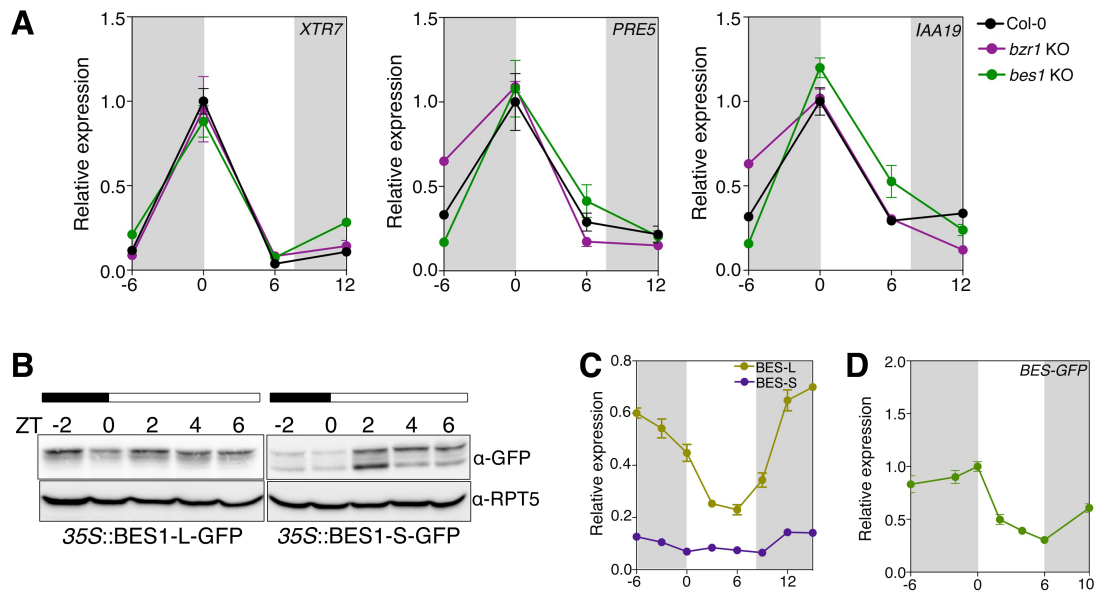

## Appendix Fig S6

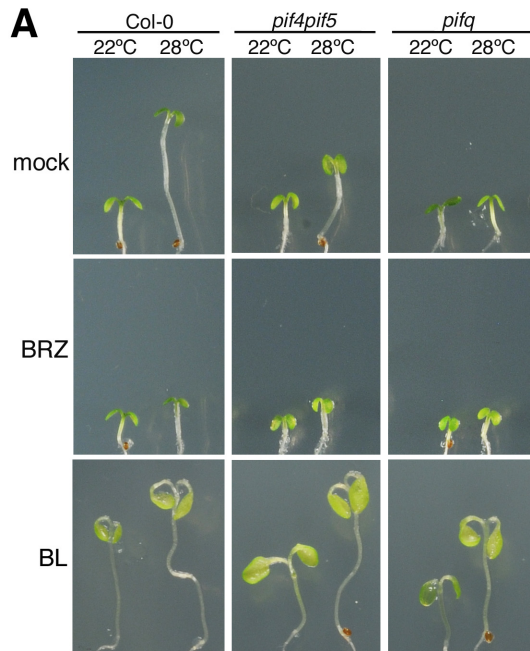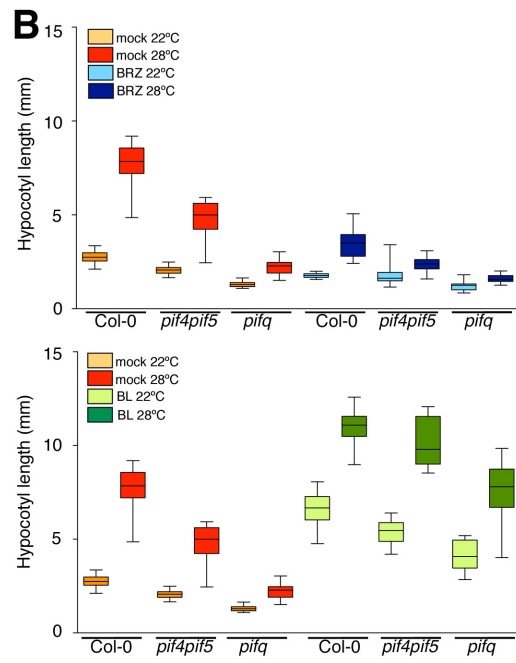



Appendix Table S1

**Appendix Table S1.** BES1-regulated genes according to differential expression data. See legend for details.

| Name      | 1 | 2 | 3  | 4  | 5 | 6  | 7  | bes1D_Col | bes1Dpif45_pif45 | ALL_BES |
|-----------|---|---|----|----|---|----|----|-----------|------------------|---------|
| AT1G01050 | 0 | 0 | 0  | 0  | 0 | 0  | -1 | 0         | 0                | -1      |
| AT1G01080 | 0 | 0 | 0  | 0  | 0 | 0  | -1 | 0         | 0                | -1      |
| AT1G01120 | 1 | 1 | 0  | 1  | 0 | 1  | 1  | 0         | 0                | 1       |
| AT1G01130 | 1 | 1 | 0  | 0  | 0 | 0  | 0  | 0         | 0                | 1       |
| AT1G01170 | 0 | 0 | 0  | 0  | 0 | 0  | -1 | 0         | 0                | -1      |
| AT1G01190 | 0 | 0 | 0  | 0  | 0 | 0  | 0  | 1         | 1                | 1       |
| AT1G01210 | 0 | 0 | 0  | 0  | 0 | 0  | -1 | 0         | 0                | -1      |
| AT1G01300 | 0 | 0 | 0  | 0  | 0 | 0  | -1 | 0         | 0                | -1      |
| AT1G01340 | 0 | 0 | 0  | 0  | 0 | 0  | 0  | 1         | 0                | 1       |
| AT1G01390 | 0 | 0 | 0  | 0  | 0 | 0  | -1 | 0         | 0                | -1      |
| AT1G01420 | 0 | 0 | -1 | 0  | 0 | 0  | 0  | 0         | 0                | -1      |
| AT1G01470 | 0 | 0 | -1 | 0  | 0 | 0  | 0  | 0         | 0                | -1      |
| AT1G01480 | 0 | 0 | 0  | 0  | 0 | 1  | 0  | 0         | 0                | 1       |
| AT1G01510 | 0 | 0 | 0  | 0  | 0 | 0  | -1 | 0         | 0                | -1      |
| AT1G01540 | 1 | 1 | 0  | 0  | 0 | 0  | 0  | 0         | 0                | 1       |
| AT1G01560 | 0 | 0 | 0  | 0  | 0 | 0  | 0  | 1         | 0                | 1       |
| AT1G01600 | 0 | 0 | 1  | 0  | 0 | 1  | 1  | 0         | 1                | 1       |
| AT1G01620 | 0 | 0 | 0  | 0  | 0 | 0  | 1  | 0         | 0                | 1       |
| AT1G01630 | 0 | 0 | 0  | 0  | 0 | 0  | 1  | 0         | 0                | 1       |
| AT1G01650 | 0 | 0 | 0  | 0  | 0 | 0  | -1 | 0         | 0                | -1      |
| AT1G01680 | 0 | 0 | 0  | 0  | 0 | 0  | 0  | 1         | 1                | 1       |
| AT1G01750 | 0 | 0 | 0  | 0  | 0 | -1 | 0  | 0         | 0                | -1      |
| AT1G01780 | 0 | 0 | 0  | 0  | 0 | 0  | 1  | 0         | 0                | 1       |
| AT1G01900 | 0 | 0 | 0  | 0  | 0 | 1  | 1  | 0         | 1                | 1       |
| AT1G01970 | 0 | 0 | 0  | 0  | 0 | 0  | -1 | 0         | 0                | -1      |
| AT1G02070 | 0 | 0 | 0  | 0  | 0 | -1 | 0  | 0         | 0                | -1      |
| AT1G02110 | 0 | 0 | 0  | 0  | 0 | 0  | -1 | 0         | 0                | -1      |
| AT1G02170 | 0 | 0 | -1 | 0  | 0 | 0  | 0  | 0         | 0                | -1      |
| AT1G02205 | 0 | 0 | 0  | 0  | 0 | 0  | 1  | 0         | 0                | 1       |
| AT1G02280 | 0 | 0 | 0  | -1 | 0 | 0  | 0  | 0         | 0                | -1      |
| AT1G02400 | 0 | 0 | 0  | 0  | 0 | 1  | 0  | 0         | 0                | 1       |
| AT1G02470 | 0 | 0 | 0  | 0  | 0 | 1  | 0  | 1         | 0                | 1       |
| AT1G02475 | 0 | 0 | 0  | 0  | 0 | 0  | -1 | 0         | 0                | -1      |
| AT1G02620 | 0 | 0 | 0  | 0  | 0 | -1 | 0  | 0         | 0                | -1      |
| AT1G02650 | 0 | 0 | 0  | 0  | 0 | 1  | 0  | 0         | 0                | 1       |
| AT1G02660 | 0 | 0 | 0  | 0  | 0 | 1  | 1  | 0         | 0                | 1       |
| AT1G02670 | 0 | 0 | 0  | 0  | 0 | 1  | 0  | 0         | 0                | 1       |
| AT1G02690 | 0 | 0 | -1 | 0  | 0 | 0  | 0  | 0         | 0                | -1      |
| AT1G02730 | 0 | 0 | 0  | 0  | 0 | 1  | 0  | 0         | 0                | 1       |
| AT1G02770 | 0 | 0 | 0  | 0  | 0 | 1  | 0  | 0         | 0                | 1       |
| AT1G02800 | 0 | 0 | 0  | 0  | 0 | 1  | 0  | 0         | 0                | 1       |
| AT1G02810 | 0 | 0 | 0  | 0  | 0 | 1  | 1  | 0         | 0                | 1       |
| AT1G02820 | 0 | 0 | 0  | 0  | 0 | 0  | -1 | 0         | 0                | -1      |
| AT1G02850 | 0 | 0 | 0  | 0  | 0 | -1 | -1 | 0         | 0                | -1      |
| AT1G02860 | 1 | 1 | 1  | 0  | 0 | 0  | 1  | 0         | 0                | 1       |
| AT1G02890 | 0 | 0 | -1 | 0  | 0 | 0  | 0  | 0         | 0                | -1      |
| AT1G02900 | 0 | 0 | 0  | 0  | 0 | 0  | 1  | 0         | 0                | 1       |
| AT1G02920 | 0 | 0 | 0  | 1  | 0 | 0  | 0  | 1         | 0                | 1       |
| AT1G02930 | 0 | 0 | 0  | 0  | 0 | 0  | 0  | 1         | 0                | 1       |
| AT1G02950 | 0 | 0 | 0  | 0  | 0 | 0  | 0  | 0         | 1                | 1       |
| AT1G03030 | 0 | 0 | -1 | 0  | 0 | 0  | 0  | 0         | 0                | -1      |
| AT1G03170 | 0 | 0 | 0  | 0  | 0 | -1 | 0  | 0         | 0                | -1      |
| AT1G03180 | 0 | 0 | 0  | 0  | 0 | -1 | 0  | 0         | 0                | -1      |
| AT1G03220 | 0 | 0 | -1 | -1 | 0 | 0  | 0  | 0         | 0                | -1      |
| AT1G03280 | 0 | 0 | 0  | 0  | 0 | 0  | 1  | 0         | 0                | 1       |
| AT1G03310 | 0 | 0 | 0  | 0  | 0 | 0  | -1 | 0         | 0                | -1      |
| AT1G03370 | 0 | 0 | 0  | 1  | 0 | 0  | 0  | 0         | 0                | 1       |
| AT1G03400 | 0 | 0 | 0  | 0  | 0 | 1  | 0  | 0         | 0                | 1       |
| AT1G03440 | 0 | 0 | 0  | 0  | 0 | 0  | -1 | 0         | 0                | -1      |



Appendix Table S1

| Name      | 1  | 2  | 3  | 4  | 5 | 6  | 7  | bes1D_Col | bes1Dpif45_pif45 | ALL_BES |
|-----------|----|----|----|----|---|----|----|-----------|------------------|---------|
| AT1G05810 | 1  | 0  | 0  | 0  | 0 | 0  | 0  | 0         | 0                | 1       |
| AT1G05880 | 0  | 0  | 0  | 0  | 0 | 0  | 0  | 1         | 1                | 1       |
| AT1G05940 | 0  | 0  | -1 | 0  | 0 | 0  | 0  | 0         | 0                | -1      |
| AT1G05950 | 0  | 0  | 0  | 0  | 0 | 1  | 0  | 0         | 0                | 1       |
| AT1G06000 | -1 | 0  | 0  | 0  | 0 | 0  | 0  | 0         | 0                | -1      |
| AT1G06110 | 0  | 0  | 0  | 0  | 0 | 0  | -1 | 0         | 0                | -1      |
| AT1G06135 | 0  | 0  | 0  | 0  | 0 | 0  | 0  | 1         | 1                | 1       |
| AT1G06137 | 0  | 0  | 0  | 0  | 0 | 0  | 0  | 1         | 0                | 1       |
| AT1G06180 | -1 | -1 | 0  | 0  | 0 | 0  | 0  | 0         | 0                | -1      |
| AT1G06265 | 0  | 0  | 0  | 0  | 0 | -1 | 0  | 0         | 0                | -1      |
| AT1G06350 | 1  | 1  | 0  | 0  | 0 | 0  | 0  | 0         | 1                | 1       |
| AT1G06360 | 0  | 0  | 0  | 0  | 0 | 1  | 0  | 0         | 0                | 1       |
| AT1G06500 | 0  | 0  | 0  | 0  | 0 | -1 | 0  | 0         | 0                | -1      |
| AT1G06510 | 0  | 0  | 0  | 0  | 0 | 0  | -1 | 0         | 0                | -1      |
| AT1G06560 | 0  | 0  | 0  | 0  | 0 | 0  | -1 | 0         | 0                | -1      |
| AT1G06570 | -1 | -1 | -1 | -1 | 0 | 0  | 0  | 0         | 0                | -1      |
| AT1G06630 | 0  | 0  | 0  | 0  | 0 | 0  | -1 | 0         | 0                | -1      |
| AT1G06690 | 0  | 0  | 0  | 0  | 0 | 0  | -1 | 0         | 0                | -1      |
| AT1G06820 | 0  | 0  | 0  | 0  | 0 | 0  | -1 | 0         | 0                | -1      |
| AT1G06830 | 0  | 0  | 0  | 0  | 0 | 0  | -1 | 0         | 0                | -1      |
| AT1G06840 | 0  | 0  | 0  | 0  | 0 | 0  | 1  | 0         | 0                | 1       |
| AT1G06930 | 0  | 0  | 0  | 0  | 0 | 0  | 1  | 0         | 0                | 1       |
| AT1G07000 | 0  | 0  | 0  | 0  | 0 | 0  | 1  | 0         | 0                | 1       |
| AT1G07010 | 0  | 0  | 0  | 0  | 0 | 0  | -1 | 0         | 0                | -1      |
| AT1G07020 | 0  | 0  | 0  | 0  | 0 | 0  | -1 | 0         | 0                | -1      |
| AT1G07090 | -1 | -1 | -1 | 0  | 0 | 0  | 0  | 0         | 0                | -1      |
| AT1G07135 | 0  | 0  | 0  | 0  | 0 | 1  | 0  | 0         | 0                | 1       |
| AT1G07140 | 0  | 0  | 0  | 0  | 0 | 0  | 1  | 0         | 0                | 1       |
| AT1G07320 | 0  | 0  | 0  | 0  | 0 | 0  | -1 | 0         | 0                | -1      |
| AT1G07350 | 0  | 0  | 0  | 0  | 0 | 0  | -1 | 0         | 0                | -1      |
| AT1G07380 | 0  | 0  | -1 | 0  | 0 | 0  | 0  | 0         | 0                | -1      |
| AT1G07390 | 0  | -1 | -1 | 0  | 0 | 0  | 0  | 0         | 0                | -1      |
| AT1G07420 | -1 | -1 | 0  | 0  | 0 | 0  | 0  | 0         | 0                | -1      |
| AT1G07430 | 0  | 0  | 0  | 0  | 0 | -1 | -1 | 0         | 0                | -1      |
| AT1G07630 | 0  | 0  | 0  | 0  | 0 | 0  | 1  | 0         | 0                | 1       |
| AT1G07650 | 1  | 0  | 0  | 0  | 0 | 0  | 0  | 0         | 0                | 1       |
| AT1G07690 | 0  | 0  | 0  | 0  | 0 | 1  | 0  | 0         | 0                | 1       |
| AT1G07700 | 0  | 0  | 0  | 0  | 0 | 0  | -1 | 0         | 0                | -1      |
| AT1G07720 | 1  | 1  | 0  | 0  | 0 | 1  | 1  | 0         | 0                | 1       |
| AT1G07730 | 0  | 0  | 0  | 0  | 0 | 0  | 1  | 0         | 0                | 1       |
| AT1G07740 | 0  | 0  | 0  | 0  | 0 | 0  | 1  | 0         | 0                | 1       |
| AT1G07770 | 0  | 0  | 0  | 0  | 0 | 0  | -1 | 0         | 0                | -1      |
| AT1G07830 | 0  | 0  | 0  | 0  | 0 | 0  | -1 | 0         | 0                | -1      |
| AT1G07940 | 0  | 0  | 0  | 0  | 0 | 0  | 0  | 0         | -1               | -1      |
| AT1G07970 | 0  | 0  | 0  | 0  | 0 | 0  | -1 | 0         | 0                | -1      |
| AT1G08050 | 0  | 0  | 0  | 0  | 0 | 1  | 0  | 0         | 0                | 1       |
| AT1G08090 | 0  | 0  | 0  | 0  | 0 | 0  | 0  | 0         | -1               | -1      |
| AT1G08105 | 0  | 0  | 0  | 0  | 0 | -1 | 0  | 0         | 0                | -1      |
| AT1G08210 | 0  | 0  | 0  | 0  | 0 | 0  | -1 | 0         | 0                | -1      |
| AT1G08220 | 0  | 0  | -1 | 0  | 0 | 0  | 0  | 0         | 0                | -1      |
| AT1G08230 | -1 | -1 | 0  | 0  | 0 | 0  | -1 | 0         | 0                | -1      |
| AT1G08310 | 0  | 0  | 0  | 0  | 0 | 1  | 0  | 0         | 0                | 1       |
| AT1G08380 | 0  | 0  | 0  | 0  | 0 | 0  | -1 | 0         | 0                | -1      |
| AT1G08450 | 0  | 0  | 0  | 0  | 0 | 0  | 1  | 0         | 0                | 1       |
| AT1G08460 | 0  | 0  | 0  | 0  | 0 | 0  | -1 | 0         | 0                | -1      |
| AT1G08500 | 0  | 1  | 0  | 0  | 0 | 1  | 1  | 0         | 0                | 1       |
| AT1G08510 | 0  | 0  | 0  | 0  | 0 | 0  | 1  | 0         | 0                | 1       |
| AT1G08560 | 0  | 0  | 0  | 0  | 0 | 1  | 1  | 0         | 0                | 1       |
| AT1G08590 | 0  | 0  | 0  | 0  | 0 | 0  | 1  | 0         | 0                | 1       |
| AT1G08640 | 0  | 0  | 0  | 0  | 0 | 0  | -1 | 0         | 0                | -1      |
| AT1G08650 | 0  | 0  | 0  | 0  | 0 | 0  | 1  | 0         | 0                | 1       |

Appendix Table S1

| Name      | 1 | 2 | 3  | 4  | 5 | 6  | 7  | bes1D_Col | bes1Dpif45_pif45 | ALL_BES |
|-----------|---|---|----|----|---|----|----|-----------|------------------|---------|
| AT1G08670 | 0 | 0 | 0  | 0  | 0 | 0  | 1  | 0         | 0                | 1       |
| AT1G08680 | 0 | 0 | 0  | 0  | 0 | 0  | 1  | 0         | 0                | 1       |
| AT1G08735 | 0 | 0 | 0  | 0  | 0 | 1  | 0  | 0         | 0                | 1       |
| AT1G08800 | 0 | 0 | 0  | 0  | 0 | 0  | 1  | 0         | 0                | 1       |
| AT1G08930 | 0 | 0 | 0  | 0  | 0 | 0  | 1  | 0         | 0                | 1       |
| AT1G08980 | 0 | 0 | 0  | 0  | 0 | 0  | -1 | 0         | 0                | -1      |
| AT1G09090 | 0 | 0 | 0  | -1 | 0 | 0  | 0  | 0         | 0                | -1      |
| AT1G09155 | 0 | 0 | 0  | 0  | 0 | -1 | 0  | 0         | 0                | -1      |
| AT1G09180 | 0 | 0 | 0  | 0  | 0 | 1  | 0  | 0         | 0                | 1       |
| AT1G09200 | 0 | 0 | 0  | 0  | 0 | 0  | 1  | 0         | 0                | 1       |
| AT1G09240 | 0 | 0 | 0  | 0  | 0 | 1  | 0  | 0         | 0                | 1       |
| AT1G09280 | 0 | 0 | 0  | 0  | 0 | 0  | -1 | 0         | 0                | -1      |
| AT1G09310 | 0 | 0 | 0  | 0  | 0 | 0  | 1  | 0         | 0                | 1       |
| AT1G09340 | 0 | 0 | 0  | 0  | 0 | 0  | -1 | 0         | 0                | -1      |
| AT1G09420 | 0 | 0 | 0  | 0  | 0 | 1  | 0  | 0         | 0                | 1       |
| AT1G09460 | 0 | 0 | 0  | 0  | 0 | 0  | 1  | 0         | 0                | 1       |
| AT1G09486 | 0 | 0 | 0  | 0  | 0 | -1 | 0  | 0         | 0                | -1      |
| AT1G09530 | 0 | 0 | 0  | -1 | 0 | 0  | 0  | 0         | 0                | -1      |
| AT1G09540 | 0 | 1 | 0  | 0  | 0 | 1  | 0  | 0         | 0                | 1       |
| AT1G09560 | 0 | 0 | 0  | 0  | 0 | 0  | 0  | 0         | 1                | 1       |
| AT1G09575 | 0 | 0 | 0  | 0  | 0 | 0  | -1 | 0         | 0                | -1      |
| AT1G09650 | 0 | 0 | 0  | 0  | 0 | 1  | 0  | 0         | 0                | 1       |
| AT1G09660 | 0 | 0 | 0  | 0  | 0 | 0  | -1 | 0         | 0                | -1      |
| AT1G09740 | 0 | 0 | 0  | 0  | 0 | 0  | 1  | 0         | 0                | 1       |
| AT1G09750 | 0 | 0 | 0  | 0  | 0 | 1  | 0  | 0         | 0                | 1       |
| AT1G09812 | 0 | 0 | 0  | 0  | 0 | 1  | 0  | 0         | 0                | 1       |
| AT1G09820 | 0 | 0 | 0  | 0  | 0 | 1  | 0  | 0         | 0                | 1       |
| AT1G09890 | 0 | 0 | 0  | 0  | 0 | 1  | 0  | 0         | 0                | 1       |
| AT1G09900 | 0 | 0 | 0  | 0  | 0 | 0  | -1 | 0         | 0                | -1      |
| AT1G09930 | 0 | 0 | 0  | 0  | 0 | 1  | 0  | 0         | 0                | 1       |
| AT1G09932 | 0 | 0 | 0  | 0  | 0 | 1  | 0  | 1         | 0                | 1       |
| AT1G09970 | 0 | 0 | 0  | 0  | 0 | 0  | 1  | 0         | 0                | 1       |
| AT1G09995 | 0 | 0 | 0  | 0  | 0 | -1 | 0  | 0         | 0                | -1      |
| AT1G10000 | 0 | 0 | 0  | 0  | 0 | -1 | 0  | 0         | 0                | -1      |
| AT1G10020 | 0 | 0 | -1 | 0  | 0 | 0  | 0  | 0         | 0                | -1      |
| AT1G10050 | 0 | 0 | 0  | 0  | 0 | 0  | 1  | 0         | 0                | 1       |
| AT1G10060 | 0 | 0 | 0  | 0  | 0 | -1 | 0  | 0         | 0                | -1      |
| AT1G10090 | 0 | 0 | 0  | 0  | 0 | 0  | 1  | 0         | 0                | 1       |
| AT1G10100 | 0 | 0 | 0  | 0  | 0 | 1  | 0  | 0         | 0                | 1       |
| AT1G10110 | 0 | 0 | 0  | 0  | 0 | 1  | 0  | 0         | 0                | 1       |
| AT1G10140 | 0 | 0 | 1  | 0  | 0 | 0  | 1  | 0         | 0                | 1       |
| AT1G10160 | 0 | 0 | 0  | 0  | 0 | -1 | 0  | 0         | 0                | -1      |
| AT1G10290 | 0 | 0 | -1 | 0  | 0 | 0  | 0  | 0         | 0                | -1      |
| AT1G10370 | 0 | 0 | 0  | 0  | 0 | 1  | 0  | 0         | 0                | 1       |
| AT1G10380 | 0 | 0 | 0  | 0  | 0 | 1  | 0  | 0         | 0                | 1       |
| AT1G10450 | 0 | 0 | 0  | -1 | 0 | 0  | 0  | 0         | 0                | -1      |
| AT1G10470 | 0 | 0 | 0  | 0  | 0 | 0  | 0  | 0         | -1               | -1      |
| AT1G10480 | 0 | 0 | 0  | 0  | 0 | 1  | 0  | 0         | 0                | 1       |
| AT1G10490 | 0 | 0 | 0  | 0  | 0 | 1  | 0  | 0         | 0                | 1       |
| AT1G10522 | 0 | 0 | 0  | 0  | 0 | 0  | -1 | 0         | -1               | -1      |
| AT1G10540 | 0 | 0 | 0  | 0  | 0 | 1  | 0  | 0         | 0                | 1       |
| AT1G10550 | 1 | 1 | 1  | 1  | 1 | 0  | 0  | 0         | 0                | 1       |
| AT1G10640 | 0 | 0 | 0  | 0  | 0 | 0  | 1  | 0         | 0                | 1       |
| AT1G10650 | 0 | 0 | 0  | 0  | 0 | 0  | 1  | 0         | 0                | 1       |
| AT1G10720 | 0 | 0 | 0  | 0  | 0 | 0  | 1  | 0         | 0                | 1       |
| AT1G10740 | 1 | 1 | 1  | 0  | 0 | 0  | 0  | 0         | 0                | 1       |
| AT1G10830 | 0 | 0 | -1 | 0  | 0 | 0  | 0  | 0         | 0                | -1      |
| AT1G10920 | 0 | 0 | 0  | 0  | 0 | 1  | 0  | 0         | 0                | 1       |
| AT1G10960 | 0 | 0 | 0  | 0  | 0 | 0  | -1 | 0         | 0                | -1      |
| AT1G11000 | 0 | 0 | 0  | 0  | 0 | 0  | 1  | 0         | 0                | 1       |
| AT1G11070 | 0 | 0 | 0  | 0  | 0 | -1 | 0  | 0         | 0                | -1      |

Appendix Table S1

| Name      | 1  | 2  | 3  | 4  | 5 | 6  | 7  | bes1D_Col | bes1Dpif45_pif45 | ALL_BES |
|-----------|----|----|----|----|---|----|----|-----------|------------------|---------|
| AT1G11080 | 0  | 0  | 0  | 0  | 0 | 1  | 0  | 0         | 0                | 1       |
| AT1G11120 | 0  | 0  | 0  | 0  | 0 | 1  | 0  | 0         | 0                | 1       |
| AT1G11150 | 0  | 0  | 0  | 0  | 0 | -1 | 0  | 0         | 0                | -1      |
| AT1G11190 | 0  | 0  | 0  | 0  | 0 | 1  | 0  | 0         | 0                | 1       |
| AT1G11250 | 0  | 0  | 0  | 0  | 0 | 1  | 0  | 0         | 0                | 1       |
| AT1G11260 | 0  | 0  | 1  | 1  | 0 | 0  | 0  | 0         | 0                | 1       |
| AT1G11270 | 0  | 0  | 0  | 0  | 0 | 0  | -1 | 0         | 0                | -1      |
| AT1G11350 | -1 | -1 | -1 | 0  | 0 | 0  | 0  | 0         | 0                | -1      |
| AT1G11370 | 0  | 0  | 0  | 0  | 0 | 1  | 0  | 0         | 0                | 1       |
| AT1G11410 | 1  | 1  | 0  | 0  | 0 | 0  | 1  | 0         | 0                | 1       |
| AT1G11540 | 0  | 0  | 0  | 0  | 0 | 0  | 0  | 0         | -1               | -1      |
| AT1G11545 | 1  | 1  | 1  | 0  | 0 | 0  | 1  | 0         | 0                | 1       |
| AT1G11580 | 0  | 0  | 0  | 0  | 0 | 0  | 1  | 0         | 0                | 1       |
| AT1G11670 | 0  | 0  | 0  | 0  | 0 | 0  | 1  | 0         | 0                | 1       |
| AT1G11720 | 0  | 0  | -1 | 0  | 0 | 0  | 0  | 0         | 0                | -1      |
| AT1G11740 | 0  | 0  | 0  | 0  | 0 | 1  | 0  | 0         | 0                | 1       |
| AT1G11790 | 0  | 0  | 0  | 0  | 0 | 0  | -1 | 0         | 0                | -1      |
| AT1G11850 | 0  | 0  | 0  | 0  | 0 | 0  | -1 | 0         | 0                | -1      |
| AT1G11870 | 0  | 0  | 0  | 0  | 0 | 0  | -1 | 0         | 0                | -1      |
| AT1G12000 | 0  | 0  | 0  | 0  | 0 | 0  | 1  | 0         | 0                | 1       |
| AT1G12010 | 0  | 0  | 0  | 0  | 0 | -1 | 0  | 0         | 0                | -1      |
| AT1G12040 | 0  | 0  | 0  | -1 | 0 | -1 | 0  | 0         | 0                | -1      |
| AT1G12080 | 0  | 0  | 0  | 1  | 0 | 1  | 1  | 0         | 0                | 1       |
| AT1G12090 | 0  | 0  | 0  | 0  | 0 | 1  | 1  | 0         | 0                | 1       |
| AT1G12110 | 0  | 0  | 0  | 0  | 0 | 0  | 1  | 0         | 0                | 1       |
| AT1G12140 | 0  | 0  | 0  | 0  | 0 | 0  | 1  | 0         | 0                | 1       |
| AT1G12160 | 0  | 0  | 0  | 0  | 0 | -1 | 0  | 0         | 0                | -1      |
| AT1G12220 | 0  | 0  | 0  | 0  | 0 | -1 | 0  | 0         | 0                | -1      |
| AT1G12240 | 0  | 0  | 0  | 0  | 0 | 0  | 1  | 0         | 0                | 1       |
| AT1G12250 | 0  | 0  | 0  | 0  | 0 | 0  | -1 | 0         | 0                | -1      |
| AT1G12320 | 0  | 0  | 0  | 0  | 0 | 1  | 0  | 0         | 0                | 1       |
| AT1G12330 | 0  | 0  | 0  | 0  | 0 | 1  | 0  | 0         | 0                | 1       |
| AT1G12350 | 0  | 0  | 0  | 0  | 0 | 1  | 0  | 0         | 0                | 1       |
| AT1G12360 | 0  | 0  | 0  | 0  | 0 | 0  | 1  | 0         | 0                | 1       |
| AT1G12400 | 0  | 0  | 0  | 0  | 0 | -1 | 0  | 0         | 0                | -1      |
| AT1G12410 | 0  | 0  | 0  | 0  | 0 | -1 | -1 | 0         | 0                | -1      |
| AT1G12460 | 1  | 1  | 0  | 0  | 0 | 0  | 0  | 0         | 0                | 1       |
| AT1G12500 | 1  | 1  | 1  | 0  | 0 | 0  | 1  | 0         | 0                | 1       |
| AT1G12560 | 0  | 0  | 0  | 0  | 0 | -1 | 0  | 0         | 0                | -1      |
| AT1G12600 | 0  | 0  | 0  | 0  | 0 | 1  | 0  | 0         | 0                | 1       |
| AT1G12630 | 0  | 0  | 0  | 0  | 0 | 1  | 0  | 0         | 0                | 1       |
| AT1G12670 | 0  | 0  | 0  | 0  | 0 | 1  | 0  | 0         | 0                | 1       |
| AT1G12672 | 0  | 0  | 0  | 0  | 0 | 1  | 0  | 0         | 0                | 1       |
| AT1G12680 | 0  | 0  | 0  | 0  | 0 | 0  | -1 | 0         | 0                | -1      |
| AT1G12740 | 0  | 0  | 0  | 0  | 0 | -1 | 0  | 0         | 0                | -1      |
| AT1G12750 | 0  | 0  | -1 | 0  | 0 | 0  | -1 | 0         | 0                | -1      |
| AT1G12805 | 0  | 0  | 0  | 0  | 0 | 1  | 0  | 0         | 0                | 1       |
| AT1G12845 | 0  | 0  | -1 | 0  | 0 | 0  | 0  | 0         | 0                | -1      |
| AT1G12860 | 0  | 0  | 0  | 0  | 0 | 1  | 0  | 0         | 0                | 1       |
| AT1G12900 | 0  | 0  | 0  | 0  | 0 | 0  | -1 | 0         | 0                | -1      |
| AT1G12910 | 0  | 0  | 0  | 0  | 0 | 0  | -1 | 0         | 0                | -1      |
| AT1G12950 | 0  | 0  | 0  | 0  | 0 | -1 | 0  | 0         | 0                | -1      |
| AT1G12990 | 0  | 1  | 1  | 0  | 0 | 0  | 0  | 0         | 0                | 1       |
| AT1G13090 | 0  | 0  | 1  | 0  | 0 | 0  | 0  | 0         | 0                | 1       |
| AT1G13100 | 0  | 0  | 0  | 0  | 0 | 1  | 1  | 0         | 0                | 1       |
| AT1G13110 | 0  | 0  | 0  | 0  | 0 | 1  | 1  | 0         | 0                | 1       |
| AT1G13130 | 0  | 0  | 0  | 0  | 0 | -1 | 0  | 0         | 0                | -1      |
| AT1G13210 | 0  | 0  | 0  | 0  | 0 | 1  | 1  | 0         | 0                | 1       |
| AT1G13260 | 0  | 0  | -1 | 0  | 0 | 0  | 0  | 0         | 0                | -1      |
| AT1G13270 | 0  | 0  | 0  | 0  | 0 | 0  | -1 | 0         | 0                | -1      |
| AT1G13300 | 0  | 0  | 0  | 0  | 0 | 0  | 1  | 0         | 0                | 1       |

Appendix Table S1

| Name      | 1  | 2  | 3  | 4  | 5 | 6  | 7  | bes1D_Col | bes1Dpif45_pif45 | ALL_BES |
|-----------|----|----|----|----|---|----|----|-----------|------------------|---------|
| AT1G13310 | 0  | 0  | 0  | 0  | 0 | 0  | 0  | 0         | 1                | 1       |
| AT1G13340 | 0  | 0  | 0  | 0  | 0 | 1  | 0  | 0         | 0                | 1       |
| AT1G13370 | 0  | 0  | 0  | 0  | 0 | 0  | -1 | 0         | 0                | -1      |
| AT1G13380 | 0  | 0  | 0  | 0  | 0 | 0  | -1 | 0         | 0                | -1      |
| AT1G13480 | 0  | 0  | 0  | 0  | 0 | 0  | 0  | 1         | 1                | 1       |
| AT1G13520 | 0  | 0  | 0  | 0  | 0 | 0  | 0  | 1         | 0                | 1       |
| AT1G13560 | -1 | -1 | 0  | 0  | 0 | 0  | 0  | 0         | 0                | -1      |
| AT1G13570 | 0  | 0  | 0  | 0  | 0 | 0  | -1 | 0         | 0                | -1      |
| AT1G13590 | 0  | 0  | 1  | 0  | 0 | 0  | 0  | 0         | 0                | 1       |
| AT1G13670 | 0  | 0  | 0  | 0  | 0 | 0  | 0  | 0         | 1                | 1       |
| AT1G13710 | 0  | -1 | 0  | 0  | 0 | -1 | -1 | 0         | 0                | -1      |
| AT1G13930 | 0  | 0  | 0  | 0  | 0 | -1 | 0  | 0         | 0                | -1      |
| AT1G14000 | 0  | 0  | 0  | 0  | 0 | 0  | 1  | 0         | 0                | 1       |
| AT1G14030 | 0  | 0  | 0  | -1 | 0 | 0  | 0  | 0         | 0                | -1      |
| AT1G14080 | 0  | 0  | 0  | 0  | 0 | -1 | 0  | 0         | 0                | -1      |
| AT1G14100 | 0  | 0  | 0  | 0  | 0 | 1  | 0  | 0         | 0                | 1       |
| AT1G14140 | 0  | 0  | 0  | 0  | 0 | 0  | -1 | 0         | 0                | -1      |
| AT1G14150 | 0  | 0  | 0  | 0  | 0 | 0  | -1 | 0         | 0                | -1      |
| AT1G14185 | 0  | 0  | 0  | 0  | 0 | -1 | 0  | -1        | 0                | -1      |
| AT1G14210 | 0  | 0  | 0  | -1 | 0 | 0  | 0  | 0         | 0                | -1      |
| AT1G14220 | 0  | 0  | 0  | 0  | 0 | -1 | 0  | 0         | 0                | -1      |
| AT1G14240 | 0  | 0  | 0  | 0  | 0 | -1 | 0  | -1        | 0                | -1      |
| AT1G14270 | 0  | 0  | 0  | 0  | 0 | 0  | -1 | 0         | 0                | -1      |
| AT1G14290 | 0  | 1  | 0  | 0  | 0 | 0  | 0  | 0         | 0                | 1       |
| AT1G14345 | 0  | 0  | 0  | 0  | 0 | 0  | -1 | -1        | 0                | -1      |
| AT1G14370 | 0  | 0  | 0  | 0  | 0 | 0  | 1  | 0         | 0                | 1       |
| AT1G14410 | 0  | 0  | 0  | 0  | 0 | 0  | -1 | 0         | 0                | -1      |
| AT1G14480 | 0  | 0  | 0  | 0  | 0 | 0  | 1  | 0         | 0                | 1       |
| AT1G14520 | 0  | 0  | 0  | 0  | 0 | 1  | 0  | 0         | 0                | 1       |
| AT1G14540 | 0  | 0  | 0  | 0  | 0 | 1  | 0  | 1         | 0                | 1       |
| AT1G14550 | 0  | 0  | 0  | 0  | 0 | 0  | 0  | 1         | 1                | 1       |
| AT1G14580 | -1 | -1 | 0  | 0  | 0 | 0  | 0  | 0         | 0                | -1      |
| AT1G14620 | 0  | 0  | 0  | 0  | 0 | 0  | -1 | 0         | 0                | -1      |
| AT1G14700 | -1 | -1 | 0  | 0  | 0 | 0  | 0  | 0         | -1               | -1      |
| AT1G14720 | 0  | 0  | -1 | 0  | 0 | 0  | 0  | 0         | 0                | -1      |
| AT1G14800 | 0  | 0  | 0  | 0  | 0 | 1  | 0  | 0         | 0                | 1       |
| AT1G14810 | 0  | 0  | 0  | 0  | 0 | 0  | -1 | 0         | 0                | -1      |
| AT1G14820 | -1 | 0  | -1 | 0  | 0 | 0  | 0  | 0         | 0                | -1      |
| AT1G14870 | 0  | 0  | 0  | 0  | 0 | 0  | 0  | 1         | 0                | 1       |
| AT1G14880 | 0  | 0  | 0  | 0  | 0 | 1  | 0  | 0         | 0                | 1       |
| AT1G14890 | 0  | 0  | 0  | 0  | 0 | -1 | 0  | 0         | 0                | -1      |
| AT1G14920 | 0  | 0  | 0  | 0  | 0 | 0  | -1 | 0         | 0                | -1      |
| AT1G14960 | 0  | 0  | 0  | 0  | 0 | -1 | 0  | 0         | 0                | -1      |
| AT1G14970 | 0  | -1 | 0  | 0  | 0 | -1 | 0  | 0         | 0                | -1      |
| AT1G15010 | 0  | 0  | 0  | 0  | 0 | -1 | -1 | 0         | 0                | -1      |
| AT1G15060 | 0  | 0  | -1 | 0  | 0 | 0  | 0  | 0         | 0                | -1      |
| AT1G15125 | 0  | 0  | 0  | 0  | 0 | -1 | 0  | 0         | 0                | -1      |
| AT1G15140 | 0  | 0  | 0  | 0  | 0 | 0  | -1 | 0         | 0                | -1      |
| AT1G15180 | 0  | 0  | 0  | 0  | 0 | 0  | -1 | 0         | 0                | -1      |
| AT1G15210 | 0  | 0  | 0  | 0  | 0 | 0  | 1  | 0         | 0                | 1       |
| AT1G15220 | 0  | 0  | 0  | 0  | 0 | 0  | -1 | 0         | 0                | -1      |
| AT1G15290 | 0  | 0  | -1 | 0  | 0 | 0  | 0  | 0         | 0                | -1      |
| AT1G15390 | 0  | 0  | 0  | 0  | 0 | 0  | -1 | 0         | 0                | -1      |
| AT1G15400 | 0  | 0  | 0  | 0  | 0 | 0  | 1  | 0         | 0                | 1       |
| AT1G15440 | 0  | 0  | 0  | -1 | 0 | 0  | -1 | 0         | 0                | -1      |
| AT1G15460 | 0  | 0  | 0  | 0  | 0 | -1 | 0  | 0         | 0                | -1      |
| AT1G15470 | 0  | 0  | -1 | 0  | 0 | 0  | 0  | 0         | 0                | -1      |
| AT1G15550 | 0  | 0  | 0  | 0  | 0 | 0  | 1  | 0         | 0                | 1       |
| AT1G15580 | 0  | 0  | 0  | 1  | 0 | 0  | 1  | 0         | 0                | 1       |
| AT1G15630 | 0  | 0  | 0  | 0  | 0 | 0  | 0  | 1         | 0                | 1       |
| AT1G15640 | 0  | 0  | 0  | 0  | 0 | 0  | 1  | 1         | 0                | 1       |

Appendix Table S1

| Name      | 1  | 2  | 3  | 4 | 5 | 6  | 7  | bes1D_Col | bes1Dpif45_pif45 | ALL_BES |
|-----------|----|----|----|---|---|----|----|-----------|------------------|---------|
| AT1G15700 | 0  | 0  | 0  | 0 | 0 | 0  | -1 | 0         | 0                | -1      |
| AT1G15720 | 0  | 0  | 0  | 0 | 0 | -1 | 0  | 0         | 0                | -1      |
| AT1G15750 | 0  | 0  | -1 | 0 | 0 | 0  | 0  | 0         | 0                | -1      |
| AT1G15810 | 0  | 0  | 0  | 0 | 0 | 0  | -1 | 0         | 0                | -1      |
| AT1G15820 | 0  | 0  | 0  | 0 | 0 | 0  | -1 | -1        | 0                | -1      |
| AT1G15870 | 0  | 0  | 0  | 0 | 0 | 1  | 0  | 0         | 0                | 1       |
| AT1G15880 | 0  | 0  | 0  | 0 | 0 | -1 | 0  | 0         | 0                | -1      |
| AT1G15885 | 0  | 0  | 0  | 0 | 0 | -1 | 0  | 0         | 0                | -1      |
| AT1G15890 | 0  | 0  | 0  | 0 | 0 | -1 | 0  | 0         | 0                | -1      |
| AT1G15900 | 0  | 0  | 0  | 0 | 0 | 1  | 0  | 0         | 0                | 1       |
| AT1G15930 | 0  | 0  | 0  | 0 | 0 | 0  | -1 | 0         | 0                | -1      |
| AT1G15960 | 0  | 0  | 0  | 0 | 0 | -1 | 0  | 0         | 0                | -1      |
| AT1G15980 | 0  | 0  | 0  | 0 | 0 | 0  | 0  | -1        | 0                | -1      |
| AT1G16000 | 0  | 0  | 0  | 0 | 0 | -1 | -1 | 0         | 0                | -1      |
| AT1G16020 | 0  | 0  | -1 | 0 | 0 | 0  | 0  | 0         | 0                | -1      |
| AT1G16080 | 0  | 0  | 0  | 0 | 0 | 0  | -1 | 0         | 0                | -1      |
| AT1G16130 | 0  | 0  | 0  | 0 | 0 | 1  | 0  | 0         | 0                | 1       |
| AT1G16140 | 0  | 0  | 0  | 0 | 0 | 1  | 0  | 0         | 0                | 1       |
| AT1G16150 | 0  | 0  | 0  | 0 | 0 | 1  | 0  | 0         | 0                | 1       |
| AT1G16170 | 0  | 0  | 0  | 0 | 0 | 0  | -1 | 0         | 0                | -1      |
| AT1G16260 | 0  | 0  | 0  | 0 | 0 | -1 | 0  | 0         | 0                | -1      |
| AT1G16330 | 0  | 0  | 0  | 0 | 0 | 1  | 0  | 0         | 0                | 1       |
| AT1G16340 | 0  | 0  | 0  | 0 | 0 | 0  | -1 | 0         | 0                | -1      |
| AT1G16420 | 0  | 0  | 0  | 1 | 0 | 0  | 0  | 0         | 0                | 1       |
| AT1G16510 | 0  | 0  | 0  | 0 | 0 | -1 | -1 | 0         | 0                | -1      |
| AT1G16550 | 0  | 0  | 0  | 0 | 0 | 1  | 0  | 0         | 0                | 1       |
| AT1G16590 | 0  | 0  | 0  | 0 | 0 | 1  | 0  | 0         | 0                | 1       |
| AT1G16620 | 0  | 0  | 0  | 0 | 0 | -1 | 0  | 0         | 0                | -1      |
| AT1G16670 | 0  | 0  | 0  | 0 | 0 | 0  | 1  | 0         | 0                | 1       |
| AT1G16750 | -1 | -1 | 0  | 0 | 0 | 0  | 0  | 0         | 0                | -1      |
| AT1G16780 | 0  | 0  | 0  | 0 | 0 | 0  | -1 | 0         | 0                | -1      |
| AT1G16790 | 0  | 0  | 0  | 0 | 0 | 0  | -1 | 0         | 0                | -1      |
| AT1G16905 | 0  | 0  | 0  | 0 | 0 | -1 | 0  | 0         | 0                | -1      |
| AT1G16920 | 0  | 0  | 0  | 0 | 0 | 0  | -1 | 0         | 0                | -1      |
| AT1G17030 | 0  | 0  | 0  | 0 | 0 | 1  | 0  | 0         | 0                | 1       |
| AT1G17060 | 1  | 0  | 0  | 0 | 0 | 1  | 1  | 0         | 0                | 1       |
| AT1G17080 | 0  | 0  | 0  | 0 | 0 | 0  | 1  | 0         | 0                | 1       |
| AT1G17100 | 0  | 0  | 0  | 0 | 0 | 0  | 0  | -1        | 0                | -1      |
| AT1G17180 | -1 | 0  | 0  | 0 | 0 | -1 | 0  | 0         | 0                | -1      |
| AT1G17190 | 0  | 0  | 0  | 0 | 0 | 0  | 1  | 0         | 0                | 1       |
| AT1G17230 | 0  | -1 | 0  | 0 | 0 | 0  | 0  | 0         | 0                | -1      |
| AT1G17240 | 0  | 0  | 0  | 0 | 0 | -1 | 0  | 0         | 0                | -1      |
| AT1G17255 | 0  | 0  | 0  | 0 | 0 | -1 | 0  | 0         | 0                | -1      |
| AT1G17260 | 0  | 0  | 0  | 0 | 0 | -1 | 0  | 0         | 0                | -1      |
| AT1G17280 | 0  | 0  | 0  | 0 | 0 | 0  | 1  | 0         | 0                | 1       |
| AT1G17345 | 0  | 0  | 0  | 0 | 0 | -1 | 0  | -1        | -1               | -1      |
| AT1G17350 | 0  | 0  | 0  | 0 | 0 | 0  | -1 | 0         | 0                | -1      |
| AT1G17360 | 0  | 0  | 0  | 0 | 0 | 0  | 1  | 0         | 0                | 1       |
| AT1G17410 | 0  | 0  | 0  | 0 | 0 | 0  | -1 | 0         | 0                | -1      |
| AT1G17430 | 0  | 0  | -1 | 0 | 0 | 0  | 0  | 0         | 0                | -1      |
| AT1G17470 | 0  | 0  | 0  | 0 | 0 | 0  | -1 | 0         | 0                | -1      |
| AT1G17480 | 0  | 0  | 0  | 0 | 0 | 1  | 0  | 0         | 0                | 1       |
| AT1G17500 | 0  | 0  | 0  | 0 | 0 | 0  | 1  | 0         | 0                | 1       |
| AT1G17560 | 0  | 0  | -1 | 0 | 0 | 0  | 0  | 0         | 0                | -1      |
| AT1G17590 | 0  | 0  | 0  | 0 | 0 | 1  | 0  | 0         | 0                | 1       |
| AT1G17600 | 0  | 0  | 0  | 0 | 0 | -1 | 0  | 0         | 0                | -1      |
| AT1G17610 | 0  | 0  | 0  | 0 | 0 | -1 | 0  | 0         | 0                | -1      |
| AT1G17620 | 1  | 1  | 1  | 0 | 0 | 1  | 1  | 0         | 0                | 1       |
| AT1G17650 | 0  | 0  | 0  | 0 | 0 | 0  | -1 | 0         | 0                | -1      |
| AT1G17700 | 0  | 0  | 0  | 0 | 0 | 0  | -1 | 0         | 0                | -1      |
| AT1G17720 | 0  | 0  | 0  | 0 | 0 | 0  | 1  | 0         | 0                | 1       |

Appendix Table S1

| Name      | 1  | 2  | 3  | 4 | 5 | 6  | 7  | bes1D_Col | bes1Dpif45_pif45 | ALL_BES |
|-----------|----|----|----|---|---|----|----|-----------|------------------|---------|
| AT1G17745 | 0  | 0  | 0  | 0 | 0 | 0  | 1  | 0         | 0                | 1       |
| AT1G17840 | 0  | 0  | 0  | 0 | 0 | 0  | 1  | 0         | 0                | 1       |
| AT1G17960 | 0  | 0  | 0  | 0 | 0 | 1  | 0  | 0         | 0                | 1       |
| AT1G17990 | 0  | 0  | -1 | 0 | 0 | 0  | 0  | 0         | 0                | -1      |
| AT1G18060 | 0  | 0  | 0  | 0 | 0 | 0  | -1 | 0         | 0                | -1      |
| AT1G18100 | 0  | 0  | 0  | 0 | 0 | 1  | 0  | 0         | 0                | 1       |
| AT1G18140 | 0  | 0  | 0  | 0 | 0 | 0  | 1  | 0         | 0                | 1       |
| AT1G18170 | 0  | 0  | 0  | 0 | 0 | 0  | -1 | 0         | 0                | -1      |
| AT1G18240 | 0  | 0  | 0  | 0 | 0 | -1 | 0  | 0         | 0                | -1      |
| AT1G18270 | 0  | 0  | 0  | 0 | 0 | 1  | 0  | 0         | 0                | 1       |
| AT1G18280 | 0  | 0  | 0  | 0 | 0 | 1  | 0  | 0         | 0                | 1       |
| AT1G18370 | 0  | 0  | 0  | 0 | 0 | 1  | 0  | 0         | 0                | 1       |
| AT1G18390 | 0  | 0  | 0  | 0 | 0 | 1  | 0  | 1         | 0                | 1       |
| AT1G18400 | 1  | 1  | 0  | 0 | 0 | 1  | 0  | 0         | 0                | 1       |
| AT1G18470 | 0  | 0  | 0  | 0 | 0 | 0  | 1  | 0         | 0                | 1       |
| AT1G18570 | 0  | 0  | 0  | 0 | 0 | 0  | 0  | 1         | 0                | 1       |
| AT1G18620 | 0  | 1  | 0  | 0 | 0 | 0  | 0  | 0         | 0                | 1       |
| AT1G18650 | 0  | 0  | 0  | 0 | 0 | 0  | -1 | 0         | 0                | -1      |
| AT1G18680 | 0  | 0  | 0  | 0 | 0 | 0  | -1 | 0         | 0                | -1      |
| AT1G18730 | 0  | 0  | 0  | 0 | 0 | 0  | -1 | 0         | 0                | -1      |
| AT1G18740 | 0  | -1 | -1 | 0 | 0 | 0  | 0  | 0         | 0                | -1      |
| AT1G18830 | 0  | 0  | 0  | 0 | 0 | 1  | 0  | 0         | 0                | 1       |
| AT1G18835 | 0  | 0  | 0  | 0 | 0 | 1  | 0  | 0         | 1                | 1       |
| AT1G18850 | 0  | 0  | 0  | 0 | 0 | 0  | -1 | 0         | 0                | -1      |
| AT1G18890 | 0  | 0  | 0  | 0 | 0 | 0  | 1  | 0         | 0                | 1       |
| AT1G18970 | 0  | 0  | 0  | 0 | 0 | 0  | 0  | 0         | 1                | 1       |
| AT1G18980 | 0  | 0  | 0  | 0 | 0 | 0  | 0  | 0         | 1                | 1       |
| AT1G19050 | -1 | -1 | 0  | 0 | 0 | 0  | 0  | -1        | -1               | -1      |
| AT1G19070 | 0  | 0  | 0  | 0 | 0 | -1 | 0  | 0         | 0                | -1      |
| AT1G19080 | 0  | 0  | 0  | 0 | 0 | -1 | 0  | 0         | 0                | -1      |
| AT1G19090 | 0  | 0  | 0  | 0 | 0 | 0  | 0  | 1         | 0                | 1       |
| AT1G19150 | 0  | 0  | 0  | 0 | 0 | 0  | -1 | 0         | 0                | -1      |
| AT1G19180 | 0  | 0  | 0  | 0 | 0 | 1  | 0  | 0         | 0                | 1       |
| AT1G19270 | 0  | 0  | 0  | 0 | 0 | 0  | 1  | 0         | 0                | 1       |
| AT1G19300 | 0  | 0  | 1  | 0 | 0 | 0  | 0  | 0         | 0                | 1       |
| AT1G19380 | 1  | 0  | 0  | 0 | 0 | 0  | 0  | 0         | 0                | 1       |
| AT1G19394 | 0  | 0  | 0  | 0 | 0 | -1 | 0  | 0         | 0                | -1      |
| AT1G19397 | 0  | 0  | 0  | 0 | 0 | -1 | 0  | 0         | 0                | -1      |
| AT1G19450 | 0  | 0  | 0  | 0 | 0 | 0  | 1  | 0         | 0                | 1       |
| AT1G19485 | 0  | 0  | 0  | 0 | 0 | -1 | 0  | 0         | 0                | -1      |
| AT1G19510 | 0  | 0  | 0  | 0 | 0 | 1  | 1  | 0         | 0                | 1       |
| AT1G19550 | 0  | 0  | 0  | 0 | 0 | 0  | -1 | 0         | 0                | -1      |
| AT1G19570 | 0  | 0  | 0  | 0 | 0 | 0  | -1 | 0         | 0                | -1      |
| AT1G19670 | 0  | 0  | 0  | 0 | 0 | 0  | 0  | -1        | 0                | -1      |
| AT1G19730 | 0  | 0  | 0  | 0 | 0 | 0  | -1 | 0         | 0                | -1      |
| AT1G19770 | 0  | 0  | 0  | 0 | 0 | 1  | 0  | 0         | 0                | 1       |
| AT1G19830 | 0  | 0  | 0  | 0 | 0 | 1  | 0  | 0         | 0                | 1       |
| AT1G19900 | 0  | 0  | -1 | 0 | 0 | -1 | 0  | 0         | 0                | -1      |
| AT1G19940 | 0  | 0  | 0  | 0 | 0 | 1  | 0  | 0         | 0                | 1       |
| AT1G19960 | 0  | 0  | 0  | 0 | 0 | 0  | 0  | 1         | 1                | 1       |
| AT1G20010 | 0  | 0  | 0  | 0 | 0 | 0  | 1  | 0         | 0                | 1       |
| AT1G20030 | 0  | 0  | 0  | 0 | 0 | -1 | 0  | 0         | 0                | -1      |
| AT1G20050 | 0  | 0  | 0  | 0 | 0 | -1 | 0  | 0         | 0                | -1      |
| AT1G20060 | 0  | 0  | 0  | 0 | 0 | 1  | 0  | 0         | 0                | 1       |
| AT1G20160 | -1 | -1 | -1 | 0 | 0 | -1 | 0  | 0         | 0                | -1      |
| AT1G20180 | 0  | 0  | 0  | 0 | 0 | 1  | 0  | 0         | 1                | 1       |
| AT1G20280 | 0  | 0  | 0  | 0 | 0 | 1  | 0  | 0         | 0                | 1       |
| AT1G20340 | 0  | 0  | 0  | 0 | 0 | 0  | -1 | 0         | 0                | -1      |
| AT1G20380 | 0  | 0  | -1 | 0 | 0 | 0  | 0  | 0         | 0                | -1      |
| AT1G20400 | 0  | 0  | 0  | 0 | 0 | -1 | 0  | 0         | 0                | -1      |
| AT1G20430 | 0  | 0  | 0  | 0 | 0 | 0  | -1 | 0         | 0                | -1      |



Appendix Table S1

| Name      | 1  | 2  | 3  | 4  | 5 | 6  | 7  | bes1D_Col | bes1Dpif45_pif45 | ALL_BES |
|-----------|----|----|----|----|---|----|----|-----------|------------------|---------|
| AT1G20440 | 0  | 0  | 0  | 0  | 0 | 1  | 1  | 0         | 0                | 1       |
| AT1G20450 | 0  | 0  | 0  | 0  | 0 | 1  | 1  | 0         | 0                | 1       |
| AT1G20490 | 0  | 0  | 0  | 0  | 0 | -1 | 0  | 0         | 0                | -1      |
| AT1G20515 | 0  | 0  | 0  | 0  | 0 | -1 | 0  | 0         | 0                | -1      |
| AT1G20540 | 0  | 0  | 0  | 0  | 0 | 0  | -1 | 0         | 0                | -1      |
| AT1G20560 | 0  | -1 | 0  | 0  | 0 | 0  | -1 | 0         | 0                | -1      |
| AT1G20590 | 0  | 0  | 0  | 0  | 0 | 1  | 1  | 0         | 0                | 1       |
| AT1G20610 | 0  | 0  | 0  | 0  | 0 | 1  | 1  | 0         | 0                | 1       |
| AT1G20650 | 0  | 0  | 0  | 0  | 0 | 0  | -1 | 0         | 0                | -1      |
| AT1G20693 | 0  | 0  | 0  | 0  | 0 | 0  | 1  | 0         | 0                | 1       |
| AT1G20770 | 0  | 0  | -1 | 0  | 0 | 0  | 0  | 0         | 0                | -1      |
| AT1G20790 | 0  | 0  | 0  | 0  | 0 | -1 | 0  | 0         | 0                | -1      |
| AT1G20810 | 0  | 0  | 0  | 0  | 0 | 0  | -1 | -1        | -1               | -1      |
| AT1G20880 | 0  | 0  | 0  | 0  | 0 | 0  | 1  | 0         | 0                | 1       |
| AT1G20910 | 0  | 0  | 0  | 0  | 0 | 0  | -1 | 0         | 0                | -1      |
| AT1G20930 | 0  | 0  | 0  | 0  | 0 | 1  | 0  | 0         | 0                | 1       |
| AT1G20980 | 0  | 0  | -1 | 0  | 0 | 0  | 0  | 0         | 0                | -1      |
| AT1G21020 | 0  | 0  | 0  | 0  | 0 | 1  | 0  | 0         | 0                | 1       |
| AT1G21040 | 0  | 0  | 0  | 0  | 0 | 1  | 0  | 0         | 0                | 1       |
| AT1G21050 | -1 | -1 | -1 | 0  | 0 | 0  | -1 | 0         | 0                | -1      |
| AT1G21065 | 0  | 0  | 0  | 0  | 0 | 0  | -1 | 0         | 0                | -1      |
| AT1G21080 | 0  | 0  | 0  | 0  | 0 | 1  | 1  | 0         | 0                | 1       |
| AT1G21090 | 0  | 0  | 0  | 0  | 0 | 1  | 0  | 0         | 0                | 1       |
| AT1G21110 | 0  | 0  | 0  | 0  | 0 | 0  | 0  | 1         | 0                | 1       |
| AT1G21120 | 0  | 0  | 0  | 0  | 0 | 0  | 0  | 1         | 0                | 1       |
| AT1G21130 | 0  | 0  | 0  | 0  | 0 | -1 | 0  | 0         | 0                | -1      |
| AT1G21140 | 0  | 0  | 0  | 0  | 0 | 1  | 0  | 0         | 0                | 1       |
| AT1G21150 | 0  | 0  | 0  | 0  | 0 | -1 | 0  | 0         | -1               | -1      |
| AT1G21190 | 0  | 0  | -1 | 0  | 0 | 0  | 0  | 0         | 0                | -1      |
| AT1G21200 | 0  | 0  | 0  | 0  | 0 | 0  | 1  | 0         | 0                | 1       |
| AT1G21280 | 0  | 0  | 0  | 0  | 0 | 0  | 0  | -1        | 0                | -1      |
| AT1G21410 | -1 | -1 | 0  | 0  | 0 | 0  | 0  | 0         | 0                | -1      |
| AT1G21440 | 0  | 0  | 0  | 0  | 0 | 0  | -1 | 0         | 0                | -1      |
| AT1G21460 | -1 | -1 | 0  | 0  | 0 | -1 | -1 | 0         | 0                | -1      |
| AT1G21500 | 0  | 0  | 0  | 0  | 0 | 0  | -1 | -1        | 0                | -1      |
| AT1G21520 | 0  | 0  | 0  | 0  | 0 | 1  | 0  | 0         | 0                | 1       |
| AT1G21680 | 0  | 0  | 0  | 0  | 0 | 0  | -1 | 0         | 0                | -1      |
| AT1G21760 | -1 | 0  | 0  | 0  | 0 | 0  | 0  | 0         | 0                | -1      |
| AT1G21790 | 0  | 0  | 0  | 0  | 0 | 1  | 0  | 0         | 0                | 1       |
| AT1G21830 | 1  | 1  | 1  | 1  | 0 | 0  | 0  | 0         | 0                | 1       |
| AT1G21840 | 0  | 0  | 0  | 0  | 0 | 0  | -1 | 0         | 0                | -1      |
| AT1G21900 | 0  | 0  | 0  | 0  | 0 | 0  | 1  | 0         | 0                | 1       |
| AT1G21930 | 0  | 0  | 0  | 0  | 0 | 0  | -1 | 0         | 0                | -1      |
| AT1G22040 | -1 | -1 | 0  | 0  | 0 | 0  | 0  | 0         | 0                | -1      |
| AT1G22070 | 0  | 0  | 0  | 0  | 0 | 1  | 0  | 0         | 0                | 1       |
| AT1G22110 | 0  | 0  | 0  | 0  | 0 | 0  | 1  | 0         | 0                | 1       |
| AT1G22180 | 0  | 0  | 0  | 0  | 0 | 0  | 1  | 0         | 0                | 1       |
| AT1G22190 | 0  | 0  | 0  | 0  | 0 | 0  | -1 | 0         | 0                | -1      |
| AT1G22220 | 0  | 0  | 0  | 0  | 0 | -1 | 0  | 0         | 0                | -1      |
| AT1G22300 | 0  | 0  | 0  | 0  | 0 | 0  | 1  | 0         | 0                | 1       |
| AT1G22330 | 0  | 0  | 0  | 0  | 0 | 0  | 1  | 0         | 0                | 1       |
| AT1G22360 | 0  | -1 | 0  | -1 | 0 | 0  | 0  | 0         | 0                | -1      |
| AT1G22400 | 0  | 0  | 0  | 0  | 0 | -1 | 0  | 0         | 0                | -1      |
| AT1G22410 | 0  | 0  | 0  | 0  | 0 | 0  | 1  | 0         | 0                | 1       |
| AT1G22430 | 0  | 0  | 0  | 0  | 0 | 0  | -1 | 0         | 0                | -1      |
| AT1G22440 | 0  | 0  | 0  | 0  | 0 | 0  | 1  | 0         | 0                | 1       |
| AT1G22490 | 0  | 0  | 0  | 0  | 0 | 1  | 0  | 0         | 0                | 1       |
| AT1G22500 | 0  | 0  | 0  | 0  | 0 | 0  | 1  | 0         | 0                | 1       |
| AT1G22530 | 1  | 1  | 0  | 0  | 0 | 1  | 1  | 0         | 1                | 1       |
| AT1G22590 | 0  | 0  | 0  | 0  | 0 | 0  | -1 | -1        | -1               | -1      |
| AT1G22630 | 0  | 0  | 0  | 0  | 0 | -1 | -1 | -1        | 0                | -1      |

Appendix Table S1

| Name      | 1  | 2  | 3  | 4  | 5 | 6  | 7  | bes1D_Col | bes1Dpif45_pif45 | ALL_BES |
|-----------|----|----|----|----|---|----|----|-----------|------------------|---------|
| AT1G22650 | 0  | 0  | -1 | 0  | 0 | -1 | 0  | -1        | 0                | -1      |
| AT1G22690 | 0  | 0  | 0  | 0  | 0 | -1 | 0  | 0         | 0                | -1      |
| AT1G22700 | 0  | 0  | 0  | 0  | 0 | 0  | -1 | 0         | 0                | -1      |
| AT1G22710 | 0  | 0  | 0  | 0  | 0 | 0  | -1 | 0         | 0                | -1      |
| AT1G22740 | 0  | 0  | 0  | 0  | 0 | 0  | 1  | 0         | 0                | 1       |
| AT1G22750 | 0  | 0  | 0  | 0  | 0 | 0  | -1 | 0         | 0                | -1      |
| AT1G22800 | 0  | 0  | 0  | 0  | 0 | -1 | 0  | 0         | 0                | -1      |
| AT1G22810 | 0  | 0  | 0  | 0  | 0 | 0  | 0  | 0         | 1                | 1       |
| AT1G22850 | 0  | 0  | 0  | 0  | 0 | 0  | -1 | 0         | 0                | -1      |
| AT1G22880 | 0  | 0  | 0  | 0  | 0 | -1 | 0  | 0         | 0                | -1      |
| AT1G22890 | 0  | 0  | 0  | 1  | 0 | 0  | 0  | 1         | 0                | 1       |
| AT1G22910 | 0  | 0  | 0  | 0  | 0 | 0  | 1  | 0         | 0                | 1       |
| AT1G22930 | 0  | 0  | 0  | 0  | 0 | 0  | 1  | 0         | 0                | 1       |
| AT1G22990 | 0  | 0  | 0  | 0  | 0 | 0  | 0  | -1        | -1               | -1      |
| AT1G23010 | 0  | 0  | 0  | 0  | 0 | -1 | 0  | 0         | 0                | -1      |
| AT1G23020 | 0  | 0  | 0  | -1 | 0 | -1 | 0  | 0         | 0                | -1      |
| AT1G23030 | 0  | 0  | 0  | 1  | 0 | 0  | 0  | 0         | 0                | 1       |
| AT1G23080 | -1 | -1 | -1 | -1 | 0 | 0  | 0  | 0         | 0                | -1      |
| AT1G23180 | 0  | 0  | 0  | -1 | 0 | 0  | 0  | 0         | 0                | -1      |
| AT1G23205 | -1 | 0  | -1 | 0  | 0 | -1 | 0  | 0         | 0                | -1      |
| AT1G23310 | 0  | 0  | 0  | 0  | 0 | 0  | -1 | 0         | 0                | -1      |
| AT1G23360 | 0  | 0  | 0  | 0  | 0 | -1 | -1 | 0         | 0                | -1      |
| AT1G23410 | 0  | 0  | 0  | 0  | 0 | -1 | 0  | 0         | 0                | -1      |
| AT1G23440 | 0  | 0  | 0  | 0  | 0 | 0  | 1  | 0         | 0                | 1       |
| AT1G23480 | 0  | 1  | 0  | 0  | 0 | 0  | 0  | 0         | 0                | 1       |
| AT1G23510 | 0  | 0  | 0  | 0  | 0 | 1  | 0  | 1         | 1                | 1       |
| AT1G23550 | 0  | 0  | 0  | 0  | 0 | 1  | 0  | 0         | 0                | 1       |
| AT1G23560 | 0  | 0  | 0  | 0  | 0 | 0  | 0  | -1        | 0                | -1      |
| AT1G23570 | 0  | 0  | 0  | 1  | 0 | 0  | 0  | 0         | 0                | 1       |
| AT1G23720 | 0  | 0  | 0  | 0  | 0 | -1 | 0  | 0         | 0                | -1      |
| AT1G23750 | 0  | 0  | 0  | 0  | 0 | -1 | 0  | 0         | 0                | -1      |
| AT1G23760 | 0  | 0  | 0  | 0  | 0 | 1  | 1  | 0         | 0                | 1       |
| AT1G23780 | 0  | 0  | -1 | 0  | 0 | 0  | 0  | 0         | 0                | -1      |
| AT1G23790 | 0  | 0  | 0  | 0  | 0 | 1  | 0  | 0         | 0                | 1       |
| AT1G23800 | 0  | 0  | 0  | 0  | 0 | 0  | 1  | 0         | 0                | 1       |
| AT1G23840 | 0  | 0  | 0  | 1  | 0 | 0  | 0  | 1         | 1                | 1       |
| AT1G23860 | 0  | 0  | 0  | 0  | 0 | 0  | -1 | 0         | 0                | -1      |
| AT1G23935 | 0  | 0  | 0  | 0  | 0 | 1  | 0  | 0         | 0                | 1       |
| AT1G23940 | 0  | 0  | 0  | 0  | 0 | 1  | 0  | 1         | 1                | 1       |
| AT1G23960 | 0  | 0  | 0  | 0  | 0 | 0  | 0  | -1        | -1               | -1      |
| AT1G24020 | 0  | -1 | 0  | 0  | 0 | -1 | 0  | -1        | -1               | -1      |
| AT1G24040 | 0  | 0  | 0  | 0  | 0 | 0  | -1 | 0         | 0                | -1      |
| AT1G24120 | 0  | 0  | 0  | 0  | 0 | 0  | 1  | 0         | 0                | 1       |
| AT1G24140 | 0  | 0  | 0  | 0  | 0 | 1  | 0  | 1         | 0                | 1       |
| AT1G24147 | 0  | 0  | 0  | 0  | 0 | 1  | 0  | 0         | 0                | 1       |
| AT1G24150 | 0  | 0  | 0  | 0  | 0 | 1  | 0  | 0         | 1                | 1       |
| AT1G24170 | 1  | 1  | 1  | 1  | 0 | 0  | 0  | 0         | 0                | 1       |
| AT1G24240 | 0  | 0  | 0  | 0  | 0 | 0  | 0  | -1        | -1               | -1      |
| AT1G24280 | 0  | 0  | -1 | 0  | 0 | 0  | 0  | 0         | 0                | -1      |
| AT1G24290 | 0  | 0  | 0  | 0  | 0 | 0  | -1 | 0         | 0                | -1      |
| AT1G24320 | 0  | 0  | 0  | 0  | 0 | -1 | 0  | 0         | 0                | -1      |
| AT1G24340 | 0  | 0  | 0  | -1 | 0 | 0  | -1 | 0         | 0                | -1      |
| AT1G24370 | 0  | 0  | 0  | 0  | 0 | 1  | 0  | 0         | 0                | 1       |
| AT1G24388 | 0  | 0  | 0  | 0  | 0 | 1  | 0  | 0         | 0                | 1       |
| AT1G24390 | 0  | 0  | 0  | 0  | 0 | 1  | 0  | 0         | 0                | 1       |
| AT1G24430 | 0  | 0  | 0  | 0  | 0 | 0  | 0  | 1         | 0                | 1       |
| AT1G24440 | 0  | 0  | 0  | 0  | 0 | 0  | 1  | 0         | 0                | 1       |
| AT1G24450 | 0  | 0  | 0  | 0  | 0 | 0  | -1 | 0         | 0                | -1      |
| AT1G24530 | 0  | 0  | 0  | 0  | 0 | 0  | -1 | 0         | 0                | -1      |
| AT1G24575 | 0  | 0  | 0  | 0  | 0 | -1 | 0  | 0         | 0                | -1      |
| AT1G24650 | 0  | 0  | 0  | 1  | 0 | 0  | 0  | 0         | 0                | 1       |

Appendix Table S1

| Name      | 1  | 2  | 3  | 4 | 5 | 6  | 7  | bes1D_Col | bes1Dpif45_pif45 | ALL_BES |
|-----------|----|----|----|---|---|----|----|-----------|------------------|---------|
| AT1G24792 | 0  | 0  | 0  | 0 | 0 | -1 | 0  | 0         | 0                | -1      |
| AT1G24793 | 0  | 0  | 0  | 0 | 0 | -1 | 0  | -1        | -1               | -1      |
| AT1G24807 | 0  | 0  | 0  | 0 | 0 | 0  | 0  | 1         | 1                | 1       |
| AT1G24851 | 0  | 0  | 0  | 0 | 0 | 1  | 0  | 0         | 0                | 1       |
| AT1G24879 | 0  | 0  | 0  | 0 | 0 | -1 | 0  | 0         | 0                | -1      |
| AT1G24880 | 0  | 0  | 0  | 0 | 0 | -1 | 0  | 0         | -1               | -1      |
| AT1G25053 | 0  | 0  | 0  | 0 | 0 | -1 | 0  | 0         | 0                | -1      |
| AT1G25150 | 0  | 0  | 0  | 0 | 0 | 0  | 0  | 0         | -1               | -1      |
| AT1G25210 | 0  | 0  | 0  | 0 | 0 | -1 | 0  | 0         | 0                | -1      |
| AT1G25211 | 0  | 0  | 0  | 0 | 0 | 0  | 0  | 0         | -1               | -1      |
| AT1G25230 | 0  | 0  | 0  | 0 | 0 | 0  | 1  | 0         | 0                | 1       |
| AT1G25260 | 0  | 0  | 0  | 0 | 0 | 0  | -1 | 0         | 0                | -1      |
| AT1G25275 | 0  | 0  | -1 | 0 | 0 | 0  | 0  | 0         | 0                | -1      |
| AT1G25290 | 0  | 0  | 0  | 0 | 0 | 0  | -1 | 0         | 0                | -1      |
| AT1G25400 | 0  | 0  | 0  | 0 | 0 | 1  | 1  | 0         | 0                | 1       |
| AT1G25450 | 0  | 0  | 0  | 0 | 0 | 0  | 1  | 0         | 0                | 1       |
| AT1G25470 | 0  | 0  | 0  | 0 | 0 | 0  | -1 | 0         | 0                | -1      |
| AT1G25560 | 0  | 0  | 0  | 0 | 0 | 0  | -1 | 0         | 0                | -1      |
| AT1G26150 | 0  | -1 | -1 | 0 | 0 | -1 | -1 | 0         | 0                | -1      |
| AT1G26200 | 0  | 0  | 0  | 0 | 0 | 1  | 0  | 0         | 0                | 1       |
| AT1G26210 | 0  | -1 | 0  | 0 | 0 | 0  | 0  | 0         | 0                | -1      |
| AT1G26220 | 0  | 0  | -1 | 0 | 0 | 0  | -1 | 0         | 0                | -1      |
| AT1G26240 | 0  | 0  | 0  | 0 | 0 | 0  | 0  | 0         | 1                | 1       |
| AT1G26250 | 0  | 0  | 0  | 0 | 0 | 0  | 0  | 1         | 1                | 1       |
| AT1G26290 | 0  | 0  | 0  | 0 | 0 | -1 | 0  | 0         | 0                | -1      |
| AT1G26380 | 0  | 1  | 0  | 0 | 0 | 0  | 0  | 1         | 1                | 1       |
| AT1G26390 | 0  | 0  | 0  | 0 | 0 | 0  | 0  | 1         | 1                | 1       |
| AT1G26400 | 0  | 0  | 0  | 0 | 0 | 0  | 0  | 1         | 1                | 1       |
| AT1G26410 | 0  | 0  | 0  | 0 | 0 | 0  | 0  | 1         | 1                | 1       |
| AT1G26420 | 0  | 0  | 0  | 0 | 0 | 0  | 0  | 1         | 0                | 1       |
| AT1G26440 | 0  | 0  | 0  | 0 | 0 | 0  | 1  | 0         | 0                | 1       |
| AT1G26460 | 0  | 0  | -1 | 0 | 0 | 0  | 0  | 0         | 0                | -1      |
| AT1G26470 | 0  | 0  | 0  | 0 | 0 | 0  | -1 | 0         | 0                | -1      |
| AT1G26540 | 0  | 0  | 0  | 0 | 0 | 1  | 0  | 0         | 0                | 1       |
| AT1G26761 | 0  | 0  | 0  | 0 | 0 | 0  | 0  | -1        | 0                | -1      |
| AT1G26820 | 0  | 0  | 0  | 0 | 0 | 0  | 1  | 0         | 0                | 1       |
| AT1G26870 | 0  | 0  | 0  | 0 | 0 | -1 | 0  | 0         | 0                | -1      |
| AT1G26900 | 0  | 0  | 0  | 0 | 0 | -1 | 0  | 0         | 0                | -1      |
| AT1G26920 | 0  | 0  | 0  | 0 | 0 | 0  | -1 | 0         | 0                | -1      |
| AT1G26930 | 0  | 0  | 0  | 0 | 0 | -1 | -1 | 0         | 0                | -1      |
| AT1G26945 | 0  | 0  | 0  | 0 | 0 | 1  | 0  | 0         | 1                | 1       |
| AT1G26960 | 1  | 1  | 0  | 0 | 0 | 1  | 1  | 0         | 0                | 1       |
| AT1G27020 | 0  | 0  | 0  | 0 | 0 | 0  | 0  | 1         | 1                | 1       |
| AT1G27030 | 0  | 0  | 0  | 0 | 0 | 0  | 1  | 0         | 0                | 1       |
| AT1G27100 | 0  | 0  | 0  | 0 | 0 | 0  | 1  | 0         | 0                | 1       |
| AT1G27140 | 0  | 0  | 0  | 0 | 0 | 1  | 0  | 0         | 0                | 1       |
| AT1G27180 | 0  | 0  | 0  | 0 | 0 | -1 | 0  | 0         | 0                | -1      |
| AT1G27210 | 1  | 1  | 0  | 0 | 0 | 0  | 0  | 0         | 0                | 1       |
| AT1G27285 | 0  | 0  | 0  | 0 | 0 | -1 | 0  | 0         | 0                | -1      |
| AT1G27460 | 0  | 0  | 0  | 0 | 0 | -1 | 0  | 0         | 0                | -1      |
| AT1G27461 | 0  | 0  | 0  | 0 | 0 | -1 | 0  | 0         | 0                | -1      |
| AT1G27520 | 0  | 0  | 0  | 0 | 0 | -1 | 0  | 0         | 0                | -1      |
| AT1G27540 | 0  | 0  | 0  | 0 | 0 | 1  | 0  | 1         | 1                | 1       |
| AT1G27560 | 0  | 0  | 0  | 0 | 0 | 1  | 0  | 0         | 0                | 1       |
| AT1G27570 | 0  | 0  | 0  | 0 | 0 | 1  | 0  | 0         | 0                | 1       |
| AT1G27580 | 0  | 0  | 0  | 0 | 0 | 1  | 0  | 0         | 0                | 1       |
| AT1G27670 | 0  | 0  | 0  | 0 | 0 | -1 | -1 | 0         | 0                | -1      |
| AT1G27680 | 0  | 0  | 0  | 0 | 0 | -1 | 0  | -1        | 0                | -1      |
| AT1G27730 | -1 | -1 | 0  | 0 | 0 | 0  | 0  | 0         | 0                | -1      |
| AT1G27900 | 0  | 0  | -1 | 0 | 0 | 0  | 0  | 0         | 0                | -1      |
| AT1G27950 | 0  | 0  | 0  | 0 | 0 | 0  | 1  | 0         | 0                | 1       |



Appendix Table S1

| Name      | 1  | 2  | 3  | 4  | 5  | 6  | 7  | bes1D_Col | bes1Dpif45_pif45 | ALL_BES |
|-----------|----|----|----|----|----|----|----|-----------|------------------|---------|
| AT1G30270 | 0  | 0  | 0  | 0  | 0  | 0  | 1  | 0         | 0                | 1       |
| AT1G30280 | 0  | 0  | 0  | 0  | 0  | 1  | 0  | 0         | 0                | 1       |
| AT1G30290 | 0  | 0  | -1 | 0  | 0  | 0  | 0  | 0         | 0                | -1      |
| AT1G30330 | 0  | -1 | 0  | 0  | 0  | 0  | 0  | 0         | 0                | -1      |
| AT1G30380 | 0  | 0  | 0  | 0  | 0  | 0  | -1 | 0         | 0                | -1      |
| AT1G30410 | -1 | 0  | 0  | 0  | 0  | 0  | 0  | 0         | 0                | -1      |
| AT1G30500 | 0  | 0  | 0  | 0  | 0  | 0  | 0  | -1        | 0                | -1      |
| AT1G30530 | -1 | 0  | 0  | 0  | 0  | 0  | -1 | -1        | -1               | -1      |
| AT1G30550 | 0  | 0  | 0  | 0  | 0  | 1  | 0  | 0         | 0                | 1       |
| AT1G30560 | 0  | 0  | 0  | 0  | 0  | 1  | 0  | 0         | 0                | 1       |
| AT1G30570 | 0  | 1  | 0  | 0  | 0  | 0  | 0  | 0         | 0                | 1       |
| AT1G30620 | 0  | 0  | 0  | 0  | 0  | 0  | 1  | 0         | 0                | 1       |
| AT1G30690 | 1  | 1  | 1  | 1  | 0  | 1  | 1  | 0         | 0                | 1       |
| AT1G30720 | 0  | 0  | 0  | 0  | 0  | 1  | 0  | 0         | 0                | 1       |
| AT1G30730 | 0  | 0  | 0  | 0  | 0  | 1  | 0  | 1         | 0                | 1       |
| AT1G30740 | 0  | 0  | 0  | 0  | 0  | 1  | 0  | 0         | 0                | 1       |
| AT1G30750 | 0  | 0  | 0  | 0  | 0  | 1  | 1  | 0         | 0                | 1       |
| AT1G30760 | 0  | 0  | 0  | 0  | 0  | 1  | 1  | 0         | 0                | 1       |
| AT1G30820 | 0  | 0  | 0  | 0  | 0  | 1  | 1  | 0         | 0                | 1       |
| AT1G30835 | 0  | 0  | 0  | 0  | 0  | -1 | 0  | 0         | 0                | -1      |
| AT1G30845 | 0  | 0  | 0  | 0  | 0  | -1 | 0  | 0         | 0                | -1      |
| AT1G30870 | 0  | 0  | 0  | 0  | 0  | -1 | 0  | 0         | -1               | -1      |
| AT1G30900 | 0  | 0  | 0  | 1  | 0  | 0  | 0  | 0         | 0                | 1       |
| AT1G30920 | 0  | 0  | 0  | 0  | 0  | -1 | 0  | 0         | 0                | -1      |
| AT1G30930 | 0  | 0  | 0  | 0  | 0  | 1  | 0  | 0         | 0                | 1       |
| AT1G30940 | 0  | 0  | 0  | 0  | 0  | 1  | 0  | 0         | 0                | 1       |
| AT1G31070 | 0  | 0  | 0  | 0  | 0  | 0  | 1  | 0         | 0                | 1       |
| AT1G31160 | 0  | 0  | 0  | 0  | 0  | 0  | -1 | 0         | 0                | -1      |
| AT1G31190 | 0  | 0  | 0  | 0  | 0  | 0  | -1 | 0         | 0                | -1      |
| AT1G31200 | 0  | 0  | 0  | 0  | 0  | 0  | 0  | 1         | 1                | 1       |
| AT1G31230 | 0  | 0  | 0  | -1 | 0  | 0  | 0  | 0         | 0                | -1      |
| AT1G31290 | 0  | 0  | 0  | 0  | 0  | 0  | -1 | 0         | 0                | -1      |
| AT1G31330 | 0  | 0  | 0  | 0  | 0  | 0  | -1 | 0         | 0                | -1      |
| AT1G31355 | 0  | 0  | 0  | 0  | 0  | -1 | 0  | 0         | 0                | -1      |
| AT1G31440 | 0  | 0  | 0  | 0  | 0  | 0  | 0  | -1        | -1               | -1      |
| AT1G31540 | 0  | 0  | 0  | 0  | 0  | 0  | 0  | 0         | -1               | -1      |
| AT1G31550 | 0  | 0  | 0  | 0  | 0  | 0  | 0  | 0         | 1                | 1       |
| AT1G31600 | 0  | 0  | 0  | 0  | 0  | -1 | 0  | -1        | -1               | -1      |
| AT1G31770 | 0  | 0  | 0  | 0  | 0  | 0  | 1  | 0         | 0                | 1       |
| AT1G31814 | 0  | 0  | 0  | 0  | 0  | 0  | 0  | -1        | -1               | -1      |
| AT1G31820 | 0  | 0  | 0  | 0  | 0  | -1 | 0  | -1        | -1               | -1      |
| AT1G31835 | 0  | 0  | 0  | 0  | 0  | -1 | 0  | 0         | 0                | -1      |
| AT1G31850 | 0  | 0  | 0  | 0  | 0  | -1 | 0  | 0         | 0                | -1      |
| AT1G31900 | 0  | 0  | 0  | 0  | 0  | -1 | 0  | 0         | 0                | -1      |
| AT1G31910 | 0  | 0  | 0  | 0  | 0  | 0  | 0  | -1        | 0                | -1      |
| AT1G32080 | 0  | 0  | 0  | 0  | 0  | 1  | 0  | 0         | 0                | 1       |
| AT1G32100 | 0  | 0  | 0  | 0  | 0  | 0  | 1  | 0         | 0                | 1       |
| AT1G32170 | 0  | 0  | 0  | 0  | 0  | 1  | 1  | 0         | 0                | 1       |
| AT1G32190 | -1 | -1 | -1 | 0  | -1 | -1 | -1 | 0         | -1               | -1      |
| AT1G32270 | 0  | 0  | 0  | 0  | 0  | -1 | 0  | 0         | 0                | -1      |
| AT1G32450 | 0  | 0  | 0  | 0  | 0  | 0  | 1  | 0         | 0                | 1       |
| AT1G32540 | 0  | 0  | 0  | 0  | 0  | 0  | -1 | 0         | 0                | -1      |
| AT1G32550 | 0  | 0  | 0  | 0  | 0  | 0  | 0  | -1        | 0                | -1      |
| AT1G32560 | 0  | 0  | 0  | 0  | 0  | 0  | 0  | -1        | 0                | -1      |
| AT1G32640 | 0  | 0  | 1  | 0  | 0  | 0  | 1  | 0         | 0                | 1       |
| AT1G32680 | 0  | 0  | 0  | 0  | 0  | 0  | -1 | 0         | 0                | -1      |
| AT1G32690 | 0  | 0  | 0  | 0  | 0  | -1 | -1 | 0         | 0                | -1      |
| AT1G32760 | 0  | 0  | 0  | 0  | 0  | 0  | -1 | 0         | 0                | -1      |
| AT1G32870 | 0  | 0  | 0  | 0  | 0  | 0  | 1  | 0         | 0                | 1       |
| AT1G32900 | -1 | -1 | 0  | 0  | 0  | 0  | 0  | 0         | 0                | -1      |
| AT1G32920 | 1  | 1  | 1  | 0  | 0  | 1  | 0  | 0         | 0                | 1       |

Appendix Table S1

| Name      | 1  | 2  | 3  | 4 | 5 | 6  | 7  | bes1D_Col | bes1Dpif45_pif45 | ALL_BES |
|-----------|----|----|----|---|---|----|----|-----------|------------------|---------|
| AT1G32930 | 0  | 0  | 1  | 0 | 0 | 0  | 0  | 0         | 0                | 1       |
| AT1G32940 | 0  | 0  | 0  | 0 | 0 | -1 | 0  | 0         | 0                | -1      |
| AT1G32950 | 0  | 0  | 0  | 0 | 0 | -1 | 0  | 0         | 0                | -1      |
| AT1G32990 | 0  | 0  | 0  | 0 | 0 | 0  | -1 | 0         | 0                | -1      |
| AT1G33170 | 0  | -1 | 0  | 0 | 0 | 0  | 0  | 0         | 0                | -1      |
| AT1G33240 | 1  | 1  | 0  | 0 | 0 | 0  | 0  | 0         | 0                | 1       |
| AT1G33250 | 0  | 0  | 0  | 0 | 0 | 0  | -1 | 0         | 0                | -1      |
| AT1G33265 | 0  | 0  | 0  | 0 | 0 | 0  | -1 | 0         | 0                | -1      |
| AT1G33290 | 0  | 0  | 0  | 0 | 0 | 0  | -1 | 0         | 0                | -1      |
| AT1G33400 | 0  | 0  | 0  | 0 | 0 | 0  | -1 | 0         | 0                | -1      |
| AT1G33440 | 0  | 0  | 0  | 0 | 0 | 0  | -1 | 0         | 0                | -1      |
| AT1G33490 | 0  | 0  | -1 | 0 | 0 | 0  | 0  | 0         | 0                | -1      |
| AT1G33560 | 0  | 0  | 0  | 0 | 0 | 0  | -1 | 0         | 0                | -1      |
| AT1G33720 | 0  | 0  | 0  | 0 | 0 | -1 | 0  | 0         | 0                | -1      |
| AT1G33750 | 0  | 0  | 0  | 0 | 0 | -1 | 0  | 0         | 0                | -1      |
| AT1G33790 | 0  | 0  | 0  | 0 | 0 | -1 | 0  | 0         | 0                | -1      |
| AT1G33800 | 0  | 0  | 0  | 0 | 0 | 0  | 1  | 0         | 0                | 1       |
| AT1G33810 | 0  | 0  | 0  | 0 | 0 | 0  | -1 | 0         | 0                | -1      |
| AT1G33811 | 0  | 0  | 0  | 0 | 0 | 0  | -1 | 0         | 0                | -1      |
| AT1G33813 | 0  | 0  | 0  | 0 | 0 | -1 | 0  | 0         | 0                | -1      |
| AT1G33980 | 0  | 0  | 0  | 0 | 0 | 0  | 1  | 0         | 0                | 1       |
| AT1G34000 | 0  | 0  | 0  | 0 | 0 | 0  | -1 | 0         | 0                | -1      |
| AT1G34050 | 0  | 0  | 0  | 0 | 0 | -1 | 0  | 0         | 0                | -1      |
| AT1G34060 | 0  | 0  | 0  | 0 | 0 | 0  | 1  | 0         | 0                | 1       |
| AT1G34100 | 0  | 0  | 0  | 0 | 0 | -1 | 0  | 0         | 0                | -1      |
| AT1G34210 | 0  | 0  | 0  | 0 | 0 | 0  | -1 | 0         | 0                | -1      |
| AT1G34240 | 0  | 0  | 0  | 0 | 0 | 1  | 0  | 0         | 0                | 1       |
| AT1G34245 | 0  | -1 | 0  | 0 | 0 | 0  | 0  | 0         | 0                | -1      |
| AT1G34310 | 0  | 0  | 0  | 0 | 0 | 0  | -1 | 0         | 0                | -1      |
| AT1G34315 | 0  | 0  | 0  | 0 | 0 | -1 | 0  | 0         | 0                | -1      |
| AT1G34370 | 0  | 0  | -1 | 0 | 0 | 0  | 0  | 0         | 0                | -1      |
| AT1G34460 | 0  | 0  | 0  | 0 | 0 | 1  | 1  | 0         | 0                | 1       |
| AT1G34510 | 0  | 0  | 0  | 0 | 0 | -1 | 0  | 0         | 0                | -1      |
| AT1G34580 | 0  | 0  | 0  | 0 | 0 | 1  | 0  | 0         | 0                | 1       |
| AT1G34630 | 0  | 0  | 0  | 0 | 0 | 0  | -1 | 0         | 0                | -1      |
| AT1G34670 | 0  | 0  | 0  | 0 | 0 | 0  | 0  | 0         | 1                | 1       |
| AT1G34750 | 0  | 0  | 0  | 1 | 0 | 1  | 1  | 0         | 0                | 1       |
| AT1G34780 | 0  | 0  | 0  | 0 | 0 | -1 | 0  | 0         | 0                | -1      |
| AT1G34844 | 0  | 0  | 0  | 0 | 0 | -1 | 0  | 0         | 0                | -1      |
| AT1G35112 | 0  | 0  | 0  | 0 | 0 | -1 | 0  | 0         | 0                | -1      |
| AT1G35115 | 0  | 0  | 0  | 0 | 0 | -1 | 0  | 0         | 0                | -1      |
| AT1G35170 | 0  | 0  | 0  | 0 | 0 | 0  | 1  | 0         | 0                | 1       |
| AT1G35180 | 1  | 1  | 1  | 0 | 0 | 0  | 1  | 0         | 0                | 1       |
| AT1G35186 | 0  | 0  | 0  | 0 | 0 | 1  | 0  | 0         | 0                | 1       |
| AT1G35210 | 0  | 0  | 0  | 0 | 0 | 0  | 0  | 1         | 0                | 1       |
| AT1G35260 | 0  | 0  | 0  | 0 | 0 | 0  | 1  | 0         | 0                | 1       |
| AT1G35320 | 0  | 0  | 0  | 0 | 0 | -1 | 0  | 0         | 0                | -1      |
| AT1G35330 | 0  | 0  | 0  | 0 | 0 | -1 | 0  | 0         | 0                | -1      |
| AT1G35350 | -1 | -1 | 0  | 0 | 0 | 0  | 0  | 0         | 0                | -1      |
| AT1G35420 | 0  | 0  | -1 | 0 | 0 | 0  | -1 | 0         | 0                | -1      |
| AT1G35513 | 0  | 0  | 0  | 0 | 0 | 1  | 0  | 0         | 0                | 1       |
| AT1G35530 | 0  | 0  | 0  | 0 | 0 | 1  | 0  | 0         | 0                | 1       |
| AT1G35560 | 0  | 0  | 0  | 0 | 0 | -1 | 0  | 0         | 0                | -1      |
| AT1G35612 | 0  | 0  | 0  | 0 | 0 | -1 | 0  | 0         | 0                | -1      |
| AT1G35625 | 0  | 0  | 0  | 0 | 0 | -1 | 0  | 0         | 0                | -1      |
| AT1G35680 | 0  | 0  | 0  | 0 | 0 | 0  | -1 | 0         | 0                | -1      |
| AT1G35780 | 0  | 0  | 0  | 0 | 0 | 1  | 0  | 0         | 0                | 1       |
| AT1G35830 | 0  | 0  | 0  | 0 | 0 | -1 | 0  | 0         | 0                | -1      |
| AT1G36060 | 0  | 0  | 0  | 0 | 0 | 0  | -1 | 0         | 0                | -1      |
| AT1G36340 | 0  | 0  | 0  | 0 | 0 | 1  | 0  | 0         | 0                | 1       |
| AT1G36622 | 0  | 0  | 0  | 0 | 0 | 0  | 0  | 1         | 1                | 1       |

Appendix Table S1

| Name      | 1  | 2  | 3  | 4  | 5 | 6  | 7  | bes1D_Col | bes1Dpif45_pif45 | ALL_BES |
|-----------|----|----|----|----|---|----|----|-----------|------------------|---------|
| AT1G36630 | 0  | 0  | 0  | 0  | 0 | 1  | 0  | 0         | 0                | 1       |
| AT1G36640 | 0  | 0  | 0  | 0  | 0 | 0  | 0  | 1         | 0                | 1       |
| AT1G36675 | 0  | 0  | 0  | 0  | 0 | 1  | 0  | 0         | 0                | 1       |
| AT1G36940 | -1 | -1 | 0  | 0  | 0 | 0  | -1 | 0         | 0                | -1      |
| AT1G37130 | 0  | 0  | -1 | 0  | 0 | 0  | 0  | 0         | 0                | -1      |
| AT1G37150 | 0  | 0  | 0  | 0  | 0 | 1  | 0  | 0         | 0                | 1       |
| AT1G41830 | 0  | 1  | 0  | 0  | 0 | 0  | 1  | 0         | 0                | 1       |
| AT1G42470 | 0  | 0  | 0  | 0  | 0 | 1  | 0  | 0         | 0                | 1       |
| AT1G42560 | 0  | 0  | 0  | 0  | 0 | 1  | 0  | 0         | 0                | 1       |
| AT1G42970 | 0  | 0  | 0  | 0  | 0 | 0  | -1 | 0         | 0                | -1      |
| AT1G43040 | 0  | 0  | 0  | 0  | 0 | 1  | 0  | 0         | 0                | 1       |
| AT1G43140 | 0  | 0  | 0  | 0  | 0 | -1 | 0  | 0         | 0                | -1      |
| AT1G43560 | 0  | 0  | 0  | 0  | 0 | 0  | -1 | 0         | 0                | -1      |
| AT1G43580 | 0  | 0  | 0  | 0  | 0 | 0  | -1 | 0         | 0                | -1      |
| AT1G43650 | 0  | 0  | 0  | 0  | 0 | -1 | 0  | 0         | 0                | -1      |
| AT1G43710 | 0  | 0  | 0  | 0  | 0 | 0  | -1 | 0         | 0                | -1      |
| AT1G43775 | 0  | 0  | 0  | 0  | 0 | -1 | 0  | 0         | 0                | -1      |
| AT1G43910 | 0  | 0  | 0  | 0  | 0 | 1  | 0  | 0         | 0                | 1       |
| AT1G44000 | 0  | 0  | 0  | 0  | 0 | 0  | -1 | -1        | 0                | -1      |
| AT1G44010 | 0  | 0  | 0  | 0  | 0 | 1  | 0  | 1         | 0                | 1       |
| AT1G44110 | 0  | 0  | 0  | 0  | 0 | 1  | 0  | 0         | 0                | 1       |
| AT1G44160 | 0  | 0  | 0  | 0  | 0 | 1  | 0  | 0         | 0                | 1       |
| AT1G44350 | 1  | 1  | 0  | 0  | 0 | 0  | 0  | 0         | 0                | 1       |
| AT1G44414 | 0  | 0  | 0  | 0  | 0 | 0  | -1 | 0         | 0                | -1      |
| AT1G44608 | 0  | 0  | 0  | 0  | 0 | 0  | 0  | 0         | 1                | 1       |
| AT1G44760 | 0  | 0  | 0  | 0  | 0 | 0  | -1 | 0         | 0                | -1      |
| AT1G44800 | 0  | 0  | 0  | 0  | 0 | 0  | 1  | 0         | 0                | 1       |
| AT1G44810 | 0  | 0  | 1  | 0  | 0 | 0  | 0  | 0         | 0                | 1       |
| AT1G44920 | 0  | 0  | 0  | 0  | 0 | 0  | -1 | 0         | 0                | -1      |
| AT1G44970 | 0  | 0  | 0  | 0  | 0 | 0  | 1  | 0         | 0                | 1       |
| AT1G45010 | 0  | 0  | 0  | 0  | 0 | 1  | 0  | 0         | 1                | 1       |
| AT1G45015 | 0  | 0  | 0  | 0  | 0 | 0  | 0  | -1        | 0                | -1      |
| AT1G45035 | 0  | 0  | 0  | 0  | 0 | -1 | 0  | 0         | 0                | -1      |
| AT1G45130 | 0  | 0  | 0  | 0  | 0 | 0  | 1  | 0         | 0                | 1       |
| AT1G45145 | 0  | 0  | 0  | 1  | 0 | 0  | 1  | 0         | 0                | 1       |
| AT1G45201 | 0  | 0  | 0  | 0  | 0 | -1 | 0  | 0         | 0                | -1      |
| AT1G45474 | 0  | 0  | 0  | 0  | 0 | 0  | -1 | 0         | 0                | -1      |
| AT1G45688 | 1  | 1  | 0  | 0  | 0 | 0  | 1  | 0         | 0                | 1       |
| AT1G46264 | -1 | -1 | 0  | 0  | 0 | 0  | -1 | 0         | 0                | -1      |
| AT1G46768 | 0  | 0  | 0  | 0  | 0 | 0  | 1  | 0         | 0                | 1       |
| AT1G47271 | 0  | 0  | 0  | 0  | 0 | 0  | 0  | 1         | 0                | 1       |
| AT1G47380 | 0  | 1  | 1  | 0  | 0 | 0  | 0  | 0         | 0                | 1       |
| AT1G47400 | 0  | 0  | 0  | 0  | 0 | 0  | -1 | 0         | 0                | -1      |
| AT1G47410 | 0  | 0  | 0  | 0  | 0 | 1  | 0  | 0         | 0                | 1       |
| AT1G47480 | 0  | 0  | 0  | 0  | 0 | 1  | 1  | 0         | 0                | 1       |
| AT1G47510 | 0  | 0  | 0  | 0  | 0 | 1  | 0  | 0         | 0                | 1       |
| AT1G47580 | 0  | 0  | 0  | -1 | 0 | 0  | 0  | 0         | 0                | -1      |
| AT1G47610 | 0  | 0  | 0  | 0  | 0 | 0  | 0  | -1        | 0                | -1      |
| AT1G47730 | 0  | 0  | 0  | 1  | 0 | 0  | 0  | 0         | 0                | 1       |
| AT1G47770 | 0  | 0  | 0  | 0  | 0 | 1  | 0  | 0         | 0                | 1       |
| AT1G47813 | 0  | 0  | 0  | 0  | 0 | 0  | -1 | 0         | 0                | -1      |
| AT1G47820 | 0  | 0  | 0  | 0  | 0 | 0  | -1 | 0         | 0                | -1      |
| AT1G47890 | 0  | 0  | 0  | 0  | 0 | 0  | 0  | 0         | 1                | 1       |
| AT1G47950 | 0  | 0  | 0  | 0  | 0 | 1  | 0  | 0         | 0                | 1       |
| AT1G47970 | 0  | -1 | -1 | 0  | 0 | 0  | 0  | 0         | 0                | -1      |
| AT1G48130 | 0  | 0  | 0  | 0  | 0 | -1 | 0  | 0         | 0                | -1      |
| AT1G48240 | 0  | 1  | 0  | 0  | 0 | 0  | 1  | 0         | 0                | 1       |
| AT1G48260 | 0  | 0  | 0  | 0  | 0 | 0  | 1  | 0         | 0                | 1       |
| AT1G48340 | 0  | 0  | 0  | 0  | 0 | 1  | 0  | 0         | 0                | 1       |
| AT1G48350 | 0  | 0  | 0  | 0  | 0 | 0  | -1 | 0         | 0                | -1      |
| AT1G48420 | 0  | 0  | 0  | 0  | 0 | 0  | -1 | 0         | 0                | -1      |

Appendix Table S1

| Name      | 1  | 2  | 3  | 4  | 5 | 6  | 7  | bes1D_Col | bes1Dpif45_pif45 | ALL_BES |
|-----------|----|----|----|----|---|----|----|-----------|------------------|---------|
| AT1G48450 | 0  | 0  | 0  | 0  | 0 | 0  | -1 | 0         | 0                | -1      |
| AT1G48480 | 0  | 0  | 0  | 0  | 0 | 1  | 1  | 0         | 0                | 1       |
| AT1G48490 | 0  | 0  | 0  | 0  | 0 | 0  | 1  | 0         | 0                | 1       |
| AT1G48550 | 0  | 0  | 0  | 0  | 0 | 0  | -1 | 0         | 0                | -1      |
| AT1G48600 | 0  | 0  | 0  | 0  | 0 | 0  | 1  | 0         | 0                | 1       |
| AT1G48690 | 0  | 1  | 0  | 0  | 0 | 1  | 0  | 0         | 0                | 1       |
| AT1G48700 | 0  | 0  | 0  | 0  | 0 | 1  | 0  | 0         | 0                | 1       |
| AT1G48750 | -1 | -1 | -1 | 0  | 0 | 0  | 0  | -1        | -1               | -1      |
| AT1G48850 | 0  | 0  | 0  | 0  | 0 | 0  | 1  | 0         | 0                | 1       |
| AT1G48930 | 0  | 0  | 0  | 0  | 0 | -1 | 0  | 0         | 0                | -1      |
| AT1G49000 | 0  | 0  | 0  | 0  | 0 | 1  | 0  | 1         | 0                | 1       |
| AT1G49030 | -1 | 0  | 0  | 0  | 0 | 0  | 0  | 0         | 0                | -1      |
| AT1G49230 | 0  | 0  | 0  | 0  | 0 | 0  | -1 | 0         | 0                | -1      |
| AT1G49320 | 0  | 0  | 0  | 0  | 0 | 0  | -1 | 0         | 0                | -1      |
| AT1G49350 | 0  | 0  | 0  | 0  | 0 | 0  | -1 | 0         | 0                | -1      |
| AT1G49450 | 0  | 0  | 0  | 0  | 0 | 1  | 0  | 0         | 0                | 1       |
| AT1G49500 | 0  | 0  | 0  | -1 | 0 | 0  | 0  | 0         | 0                | -1      |
| AT1G49580 | 0  | 0  | 0  | 0  | 0 | 0  | 1  | 0         | 0                | 1       |
| AT1G49650 | 0  | 0  | 0  | 0  | 0 | 0  | -1 | 0         | 0                | -1      |
| AT1G49750 | 0  | 0  | 0  | 0  | 0 | 0  | -1 | 0         | 0                | -1      |
| AT1G49760 | 0  | 0  | 0  | 0  | 0 | 0  | -1 | 0         | 0                | -1      |
| AT1G49780 | 0  | -1 | 0  | 0  | 0 | 0  | 0  | 0         | 0                | -1      |
| AT1G49870 | 0  | 0  | 0  | 0  | 0 | 1  | 0  | 0         | 0                | 1       |
| AT1G49890 | 0  | 0  | 0  | 0  | 0 | 0  | -1 | 0         | 0                | -1      |
| AT1G49960 | 0  | 0  | 0  | 0  | 0 | 0  | 0  | 0         | 1                | 1       |
| AT1G49975 | 0  | 0  | 0  | 0  | 0 | 0  | -1 | 0         | 0                | -1      |
| AT1G49980 | 0  | 0  | 0  | 0  | 0 | 0  | -1 | 0         | 0                | -1      |
| AT1G50060 | -1 | -1 | 0  | 0  | 0 | 0  | 0  | 0         | 0                | -1      |
| AT1G50250 | 0  | 0  | 0  | 0  | 0 | 0  | -1 | 0         | 0                | -1      |
| AT1G50290 | 0  | 0  | 0  | 0  | 0 | 1  | 0  | 0         | 0                | 1       |
| AT1G50420 | 0  | 0  | 0  | 1  | 0 | 0  | 0  | 0         | 0                | 1       |
| AT1G50480 | 0  | 0  | 0  | 0  | 0 | 0  | -1 | 0         | 0                | -1      |
| AT1G50490 | 0  | 0  | 0  | 0  | 0 | 0  | -1 | 0         | 0                | -1      |
| AT1G50560 | 0  | 0  | 0  | 0  | 0 | 0  | 1  | 0         | 0                | 1       |
| AT1G50575 | 0  | 0  | 0  | 0  | 0 | 0  | -1 | 0         | 0                | -1      |
| AT1G50580 | 0  | 0  | 0  | 0  | 0 | -1 | 0  | 0         | 0                | -1      |
| AT1G50730 | 0  | 0  | 0  | 0  | 0 | 0  | -1 | 0         | 0                | -1      |
| AT1G50890 | 1  | 1  | 0  | 0  | 0 | 0  | 0  | 0         | 0                | 1       |
| AT1G50900 | 0  | 0  | 0  | 0  | 0 | 0  | -1 | 0         | 0                | -1      |
| AT1G51110 | 0  | 0  | 0  | 0  | 0 | 0  | -1 | 0         | 0                | -1      |
| AT1G51170 | 0  | 0  | 0  | 0  | 0 | -1 | 0  | 0         | 0                | -1      |
| AT1G51190 | 0  | 0  | 0  | 0  | 0 | -1 | 0  | 0         | 0                | -1      |
| AT1G51310 | 0  | 0  | 0  | 0  | 0 | 0  | -1 | 0         | 0                | -1      |
| AT1G51360 | 0  | 0  | 0  | 0  | 0 | 0  | -1 | 0         | 0                | -1      |
| AT1G51390 | 0  | 0  | 0  | 0  | 0 | 0  | -1 | 0         | 0                | -1      |
| AT1G51400 | 0  | 0  | -1 | 0  | 0 | 0  | -1 | 0         | 0                | -1      |
| AT1G51440 | 0  | 0  | 0  | 0  | 0 | -1 | 0  | 0         | 0                | -1      |
| AT1G51470 | 0  | 0  | 0  | 0  | 0 | -1 | 0  | 0         | 0                | -1      |
| AT1G51480 | 0  | 0  | 0  | 0  | 0 | 1  | 0  | 0         | 0                | 1       |
| AT1G51510 | 0  | 0  | 0  | 0  | 0 | 0  | 1  | 0         | 0                | 1       |
| AT1G51538 | 0  | 0  | 0  | 0  | 0 | 1  | 0  | 0         | 0                | 1       |
| AT1G51680 | 0  | 0  | 0  | 0  | 0 | 0  | 1  | 0         | 0                | 1       |
| AT1G51700 | 0  | 1  | 0  | 0  | 0 | 1  | 0  | 0         | 0                | 1       |
| AT1G51750 | 0  | 0  | 0  | 0  | 0 | -1 | 0  | 0         | 0                | -1      |
| AT1G51805 | 0  | 0  | 0  | 0  | 0 | 0  | 0  | 1         | 1                | 1       |
| AT1G51850 | 0  | 0  | 0  | 0  | 0 | 0  | 0  | 1         | 0                | 1       |
| AT1G51890 | 0  | 0  | 0  | 0  | 0 | 0  | 0  | 0         | 1                | 1       |
| AT1G51913 | 0  | 0  | 0  | 0  | 0 | 0  | 0  | 1         | 1                | 1       |
| AT1G51915 | 0  | 0  | 0  | 0  | 0 | 0  | 0  | 1         | 1                | 1       |
| AT1G51920 | 0  | 0  | 0  | 0  | 0 | 0  | 0  | 1         | 0                | 1       |
| AT1G52030 | 0  | 0  | 0  | 1  | 0 | 0  | 0  | 0         | 0                | 1       |







Appendix Table S1

| Name      | 1  | 2  | 3  | 4  | 5 | 6  | 7  | bes1D_Col | bes1Dpif45_pif45 | ALL_BES |
|-----------|----|----|----|----|---|----|----|-----------|------------------|---------|
| AT1G58170 | 0  | 0  | 0  | 0  | 0 | 0  | 0  | -1        | -1               | -1      |
| AT1G58180 | 0  | 0  | 0  | 0  | 0 | 0  | 0  | 0         | -1               | -1      |
| AT1G58235 | 0  | 0  | 0  | 0  | 0 | 0  | 0  | -1        | -1               | -1      |
| AT1G58270 | 0  | 0  | 0  | 0  | 0 | 0  | 0  | -1        | -1               | -1      |
| AT1G58280 | 0  | 0  | 0  | 0  | 0 | 0  | 0  | 0         | -1               | -1      |
| AT1G58340 | 1  | 1  | 0  | 0  | 0 | 0  | 0  | 0         | 0                | 1       |
| AT1G58370 | 0  | 0  | 0  | 0  | 0 | 0  | 1  | 0         | 0                | 1       |
| AT1G58400 | 0  | 0  | 0  | 0  | 0 | 0  | 0  | 0         | -1               | -1      |
| AT1G58420 | 0  | 0  | 0  | 0  | 0 | 0  | 0  | 1         | 0                | 1       |
| AT1G58470 | 0  | 0  | 0  | 0  | 0 | 0  | -1 | 0         | 0                | -1      |
| AT1G58590 | 0  | 0  | 0  | 0  | 0 | -1 | 0  | 0         | -1               | -1      |
| AT1G58602 | 0  | 0  | 0  | 0  | 0 | 0  | 0  | -1        | -1               | -1      |
| AT1G58807 | 0  | 0  | 0  | 0  | 0 | 0  | 0  | -1        | -1               | -1      |
| AT1G59218 | 0  | 0  | 0  | 0  | 0 | 0  | 0  | -1        | -1               | -1      |
| AT1G59359 | 0  | 0  | 0  | 0  | 0 | 0  | 0  | -1        | -1               | -1      |
| AT1G59500 | 1  | 1  | 1  | 0  | 0 | 1  | 0  | 0         | 0                | 1       |
| AT1G59590 | 0  | 0  | 0  | 0  | 0 | 1  | 1  | 0         | 0                | 1       |
| AT1G59620 | 0  | 0  | 0  | 0  | 0 | 0  | 0  | 0         | 1                | 1       |
| AT1G59640 | 0  | 0  | 0  | 0  | 0 | 0  | 0  | 0         | -1               | -1      |
| AT1G59710 | 1  | 1  | 0  | 0  | 0 | 0  | 0  | 0         | 0                | 1       |
| AT1G59830 | 0  | 0  | 0  | 0  | 0 | 0  | -1 | 0         | 0                | -1      |
| AT1G59900 | 0  | 0  | 0  | 0  | 0 | 0  | 0  | -1        | -1               | -1      |
| AT1G59910 | 0  | 0  | 0  | 0  | 0 | 0  | 1  | 0         | 0                | 1       |
| AT1G59940 | -1 | -1 | 0  | 0  | 0 | -1 | 0  | -1        | 0                | -1      |
| AT1G59960 | -1 | -1 | 0  | 0  | 0 | -1 | 0  | 0         | 0                | -1      |
| AT1G60000 | 0  | 0  | 0  | 0  | 0 | 0  | -1 | 0         | 0                | -1      |
| AT1G60030 | 0  | 0  | 0  | 1  | 0 | 1  | 1  | 0         | 0                | 1       |
| AT1G60060 | 0  | 1  | 0  | 0  | 0 | 0  | 0  | 0         | 0                | 1       |
| AT1G60070 | 0  | 0  | 0  | 0  | 0 | 0  | 1  | 0         | 0                | 1       |
| AT1G60095 | 0  | 0  | 0  | 0  | 0 | 0  | 0  | 1         | 0                | 1       |
| AT1G60160 | 0  | 0  | 0  | -1 | 0 | 0  | -1 | 0         | 0                | -1      |
| AT1G60190 | 0  | 0  | 0  | 0  | 0 | 0  | 1  | 0         | 0                | 1       |
| AT1G60230 | 0  | 0  | 0  | 0  | 0 | 0  | -1 | 0         | 0                | -1      |
| AT1G60270 | 0  | 0  | 0  | 0  | 0 | 0  | 0  | 0         | 1                | 1       |
| AT1G60360 | 0  | 0  | 0  | 0  | 0 | 0  | 0  | 0         | 1                | 1       |
| AT1G60450 | 0  | 0  | 0  | 0  | 0 | 1  | 0  | 0         | 0                | 1       |
| AT1G60490 | 0  | 0  | -1 | 0  | 0 | 0  | 0  | 0         | 0                | -1      |
| AT1G60550 | 0  | 0  | 0  | 0  | 0 | 0  | -1 | 0         | 0                | -1      |
| AT1G60600 | 0  | 0  | 0  | 0  | 0 | 0  | -1 | 0         | -1               | -1      |
| AT1G60610 | 0  | 0  | 0  | 0  | 0 | 0  | 1  | 0         | 0                | 1       |
| AT1G60740 | 0  | 0  | 0  | 0  | 0 | 1  | 1  | 0         | 0                | 1       |
| AT1G60780 | 0  | 0  | 0  | 0  | 0 | 0  | 0  | 0         | -1               | -1      |
| AT1G60890 | 0  | 0  | 1  | 0  | 0 | 0  | 0  | 0         | 0                | 1       |
| AT1G60940 | 0  | 0  | 0  | 0  | 0 | 0  | 1  | 0         | 0                | 1       |
| AT1G60950 | 0  | 0  | 0  | 0  | 0 | 0  | -1 | 0         | 0                | -1      |
| AT1G60960 | -1 | 0  | -1 | 0  | 0 | 0  | 0  | 0         | 0                | -1      |
| AT1G61100 | 0  | 1  | 1  | 0  | 0 | 0  | 0  | 0         | 0                | 1       |
| AT1G61140 | 0  | 0  | 0  | 1  | 0 | 0  | 0  | 0         | 0                | 1       |
| AT1G61170 | 1  | 1  | 0  | 0  | 0 | 0  | 1  | 0         | 0                | 1       |
| AT1G61180 | 0  | 0  | 0  | 0  | 0 | 0  | 0  | 0         | -1               | -1      |
| AT1G61190 | 0  | 0  | 0  | 0  | 0 | 0  | 0  | 0         | 1                | 1       |
| AT1G61200 | 0  | 0  | 0  | 0  | 0 | 1  | 0  | 0         | 0                | 1       |
| AT1G61230 | 0  | 0  | 0  | 0  | 0 | -1 | 0  | 0         | 0                | -1      |
| AT1G61250 | 0  | 0  | 0  | 1  | 0 | 0  | 0  | 0         | 0                | 1       |
| AT1G61255 | 0  | 0  | 0  | 0  | 0 | 1  | 0  | 0         | 1                | 1       |
| AT1G61260 | 1  | 1  | 0  | 0  | 0 | 1  | 1  | 1         | 1                | 1       |
| AT1G61280 | 0  | 0  | 0  | 0  | 0 | 0  | -1 | 0         | 0                | -1      |
| AT1G61300 | 0  | 0  | 0  | 0  | 0 | 0  | 0  | 0         | 1                | 1       |
| AT1G61310 | 0  | 0  | 0  | 0  | 0 | 0  | 0  | 0         | -1               | -1      |
| AT1G61350 | 1  | 1  | 1  | 0  | 0 | 0  | 0  | 0         | 0                | 1       |
| AT1G61390 | 0  | 0  | 0  | 1  | 0 | 1  | 0  | 0         | 0                | 1       |

Appendix Table S1

| Name      | 1  | 2  | 3  | 4 | 5 | 6  | 7  | bes1D_Col | bes1Dpif45_pif45 | ALL_BES |
|-----------|----|----|----|---|---|----|----|-----------|------------------|---------|
| AT1G61440 | 0  | 0  | 0  | 0 | 0 | 0  | 0  | 0         | 1                | 1       |
| AT1G61490 | 0  | 0  | 0  | 0 | 0 | 0  | 0  | 0         | 1                | 1       |
| AT1G61520 | 0  | 0  | 0  | 0 | 0 | 0  | -1 | 0         | 0                | -1      |
| AT1G61560 | 0  | 0  | 0  | 0 | 0 | 0  | 0  | 1         | 0                | 1       |
| AT1G61580 | 0  | 0  | 0  | 0 | 0 | 0  | 1  | 0         | 0                | 1       |
| AT1G61667 | 1  | 1  | 0  | 0 | 0 | 1  | 1  | 0         | 0                | 1       |
| AT1G61750 | 0  | 0  | 0  | 0 | 0 | 1  | 0  | 0         | 0                | 1       |
| AT1G61770 | 0  | 0  | 0  | 0 | 0 | 0  | 1  | 0         | 0                | 1       |
| AT1G61800 | 0  | 0  | 0  | 0 | 0 | 0  | -1 | 0         | 0                | -1      |
| AT1G61820 | 0  | 0  | 0  | 0 | 0 | 0  | 0  | 1         | 0                | 1       |
| AT1G61890 | 1  | 1  | 0  | 0 | 0 | 0  | 0  | 0         | 0                | 1       |
| AT1G62030 | 0  | 0  | 0  | 0 | 0 | 0  | -1 | 0         | 0                | -1      |
| AT1G62040 | 0  | 0  | 0  | 1 | 0 | 0  | 0  | 0         | 0                | 1       |
| AT1G62085 | 0  | 0  | 0  | 0 | 0 | 0  | 0  | 0         | -1               | -1      |
| AT1G62290 | 0  | 0  | 0  | 0 | 0 | 0  | -1 | 0         | 0                | -1      |
| AT1G62360 | 0  | 0  | 0  | 0 | 0 | 0  | -1 | 0         | 0                | -1      |
| AT1G62420 | 0  | 0  | 0  | 0 | 0 | 0  | 0  | 0         | 1                | 1       |
| AT1G62430 | 0  | 0  | 0  | 1 | 0 | 0  | 0  | 0         | 0                | 1       |
| AT1G62440 | 1  | 1  | 0  | 0 | 0 | 1  | 0  | 0         | 1                | 1       |
| AT1G62480 | 0  | 0  | 0  | 0 | 0 | 0  | 1  | 0         | 0                | 1       |
| AT1G62500 | 0  | -1 | 0  | 0 | 0 | 0  | -1 | 0         | 0                | -1      |
| AT1G62570 | 0  | 0  | 0  | 0 | 0 | 1  | 1  | 0         | 0                | 1       |
| AT1G62660 | 0  | 0  | 0  | 0 | 0 | 1  | 1  | 0         | 0                | 1       |
| AT1G62740 | 0  | 0  | -1 | 0 | 0 | 0  | 0  | 0         | 0                | -1      |
| AT1G62760 | 0  | 0  | 0  | 0 | 0 | 0  | -1 | 0         | 0                | -1      |
| AT1G62766 | 0  | 0  | 0  | 0 | 0 | -1 | 0  | 0         | 0                | -1      |
| AT1G62770 | 0  | 0  | 0  | 0 | 0 | 0  | -1 | 0         | 0                | -1      |
| AT1G62790 | 0  | 0  | 0  | 0 | 0 | 0  | 1  | 0         | 0                | 1       |
| AT1G62800 | 0  | 0  | 0  | 0 | 0 | 0  | 1  | 0         | 0                | 1       |
| AT1G62810 | -1 | 0  | 0  | 0 | 0 | 0  | 0  | 0         | 0                | -1      |
| AT1G62860 | 0  | 0  | 0  | 0 | 0 | 0  | 0  | 0         | -1               | -1      |
| AT1G62910 | 0  | 0  | 0  | 0 | 0 | 0  | 0  | 0         | -1               | -1      |
| AT1G62980 | 0  | 0  | 0  | 0 | 0 | -1 | 0  | 0         | -1               | -1      |
| AT1G62981 | 0  | 0  | 0  | 0 | 0 | 1  | 0  | 0         | 0                | 1       |
| AT1G62990 | 0  | 0  | 0  | 0 | 0 | 0  | 1  | 0         | 0                | 1       |
| AT1G63000 | 0  | 0  | 0  | 0 | 0 | 0  | 1  | 0         | 0                | 1       |
| AT1G63050 | -1 | -1 | 0  | 0 | 0 | 0  | 0  | 0         | 0                | -1      |
| AT1G63090 | 0  | -1 | -1 | 0 | 0 | 0  | 0  | 0         | 0                | -1      |
| AT1G63220 | 0  | 0  | 0  | 0 | 0 | 0  | 1  | 0         | 0                | 1       |
| AT1G63230 | 0  | 0  | 0  | 0 | 0 | 0  | 0  | 0         | -1               | -1      |
| AT1G63260 | 0  | 0  | 0  | 0 | 0 | -1 | -1 | 0         | -1               | -1      |
| AT1G63360 | 0  | 0  | 0  | 0 | 0 | 0  | 0  | 0         | -1               | -1      |
| AT1G63370 | 0  | 0  | 0  | 0 | 0 | 1  | 0  | 0         | 0                | 1       |
| AT1G63380 | 0  | 0  | 0  | 0 | 0 | 1  | 1  | 0         | 0                | 1       |
| AT1G63420 | 0  | 0  | 0  | 0 | 0 | 0  | 0  | 0         | -1               | -1      |
| AT1G63470 | 0  | 0  | -1 | 0 | 0 | 0  | 0  | 0         | 0                | -1      |
| AT1G63540 | 0  | 0  | 0  | 0 | 0 | 1  | 0  | 0         | 0                | 1       |
| AT1G63560 | 0  | 0  | 0  | 0 | 0 | 0  | 0  | 1         | 1                | 1       |
| AT1G63570 | 0  | 0  | 0  | 0 | 0 | 1  | 0  | 0         | 0                | 1       |
| AT1G63590 | 0  | 0  | 0  | 0 | 0 | 0  | 0  | 0         | 1                | 1       |
| AT1G63720 | -1 | -1 | 0  | 0 | 0 | 0  | 0  | 0         | 0                | -1      |
| AT1G63850 | 0  | 0  | 0  | 0 | 0 | 0  | -1 | 0         | 0                | -1      |
| AT1G63860 | 0  | 0  | 0  | 0 | 0 | 0  | 0  | 0         | -1               | -1      |
| AT1G63870 | 0  | 0  | 0  | 0 | 0 | 1  | 0  | 0         | 1                | 1       |
| AT1G63880 | 0  | 0  | -1 | 0 | 0 | -1 | 0  | 0         | -1               | -1      |
| AT1G64040 | 0  | -1 | 0  | 0 | 0 | 0  | 0  | 0         | 0                | -1      |
| AT1G64070 | 0  | 0  | 0  | 0 | 0 | 1  | 0  | 0         | 0                | 1       |
| AT1G64100 | 0  | 0  | 0  | 0 | 0 | 1  | 0  | 0         | 0                | 1       |
| AT1G64140 | 0  | 0  | -1 | 0 | 0 | 0  | 0  | 0         | 0                | -1      |
| AT1G64150 | 0  | 0  | -1 | 0 | 0 | 0  | -1 | 0         | 0                | -1      |
| AT1G64160 | 0  | 0  | 0  | 0 | 0 | 0  | 0  | 1         | 1                | 1       |

Appendix Table S1

| Name      | 1  | 2  | 3 | 4 | 5 | 6  | 7  | bes1D_Col | bes1Dpif45_pif45 | ALL_BES |
|-----------|----|----|---|---|---|----|----|-----------|------------------|---------|
| AT1G64170 | 0  | 0  | 0 | 0 | 0 | -1 | 0  | 0         | 0                | -1      |
| AT1G64185 | 0  | 0  | 0 | 0 | 0 | 0  | -1 | 0         | 0                | -1      |
| AT1G64200 | 0  | 0  | 0 | 0 | 0 | 0  | 1  | 0         | 0                | 1       |
| AT1G64210 | 0  | 0  | 0 | 0 | 0 | -1 | 0  | 0         | 0                | -1      |
| AT1G64220 | 0  | 0  | 0 | 0 | 0 | -1 | 0  | 0         | 0                | -1      |
| AT1G64250 | 0  | 0  | 0 | 0 | 0 | -1 | 0  | 0         | 0                | -1      |
| AT1G64270 | 0  | 0  | 0 | 0 | 0 | -1 | 0  | 0         | -1               | -1      |
| AT1G64330 | 1  | 1  | 0 | 0 | 0 | 0  | 0  | 0         | 0                | 1       |
| AT1G64355 | 0  | 0  | 0 | 0 | 0 | 0  | -1 | 0         | 0                | -1      |
| AT1G64370 | 0  | 0  | 0 | 0 | 0 | 0  | 1  | 0         | 0                | 1       |
| AT1G64380 | 1  | 0  | 0 | 0 | 0 | 1  | 1  | 0         | 0                | 1       |
| AT1G64390 | 0  | 0  | 0 | 0 | 0 | 1  | 1  | 0         | 0                | 1       |
| AT1G64400 | 0  | 0  | 0 | 0 | 0 | 0  | 0  | 1         | 0                | 1       |
| AT1G64405 | 0  | 0  | 0 | 0 | 0 | 1  | 0  | 0         | 0                | 1       |
| AT1G64440 | 0  | 0  | 0 | 0 | 0 | 0  | 1  | 0         | 0                | 1       |
| AT1G64470 | 0  | 0  | 0 | 0 | 0 | 0  | 1  | 0         | 0                | 1       |
| AT1G64510 | 0  | 0  | 0 | 0 | 0 | 0  | -1 | 0         | 0                | -1      |
| AT1G64540 | 0  | 0  | 0 | 0 | 0 | 1  | 0  | 0         | 0                | 1       |
| AT1G64580 | 0  | 0  | 0 | 0 | 0 | 0  | -1 | 0         | 0                | -1      |
| AT1G64600 | 0  | 0  | 0 | 0 | 0 | 1  | 0  | 0         | 0                | 1       |
| AT1G64640 | 1  | 1  | 0 | 0 | 0 | 0  | 0  | 0         | 0                | 1       |
| AT1G64660 | 0  | -1 | 0 | 0 | 0 | 0  | 0  | 0         | 0                | -1      |
| AT1G64670 | 1  | 1  | 0 | 0 | 0 | 0  | 0  | 0         | 0                | 1       |
| AT1G64680 | 0  | 0  | 0 | 0 | 0 | 1  | 0  | 0         | 0                | 1       |
| AT1G64700 | 0  | 0  | 0 | 0 | 0 | 0  | 1  | 0         | 0                | 1       |
| AT1G64710 | 0  | 0  | 0 | 0 | 0 | 1  | 1  | 0         | 0                | 1       |
| AT1G64740 | 0  | 0  | 0 | 0 | 0 | 0  | 1  | 0         | 0                | 1       |
| AT1G64770 | 0  | 0  | 0 | 0 | 0 | 0  | -1 | 0         | 0                | -1      |
| AT1G64780 | 0  | 0  | 0 | 0 | 0 | -1 | 0  | 0         | 0                | -1      |
| AT1G64900 | -1 | 0  | 0 | 0 | 0 | 0  | 0  | 0         | 0                | -1      |
| AT1G64930 | 0  | 0  | 0 | 0 | 0 | -1 | 0  | 0         | 0                | -1      |
| AT1G64940 | 0  | 0  | 0 | 0 | 0 | -1 | 0  | 0         | 0                | -1      |
| AT1G64980 | 1  | 0  | 0 | 0 | 0 | 0  | 0  | 0         | 0                | 1       |
| AT1G65060 | 0  | 0  | 0 | 0 | 0 | -1 | 0  | 0         | 0                | -1      |
| AT1G65090 | 0  | 0  | 0 | 0 | 0 | -1 | 0  | 0         | 0                | -1      |
| AT1G65150 | 0  | 0  | 0 | 0 | 0 | -1 | 0  | 0         | 0                | -1      |
| AT1G65160 | 0  | 0  | 0 | 1 | 0 | 0  | 0  | 0         | 0                | 1       |
| AT1G65180 | 0  | 0  | 0 | 0 | 0 | 1  | 0  | 0         | 0                | 1       |
| AT1G65250 | 0  | 0  | 0 | 0 | 0 | 1  | 0  | 0         | 0                | 1       |
| AT1G65270 | 0  | 0  | 0 | 0 | 0 | 0  | 1  | 0         | 0                | 1       |
| AT1G65290 | 0  | 0  | 0 | 0 | 0 | -1 | 0  | 0         | 0                | -1      |
| AT1G65310 | 1  | 1  | 1 | 1 | 1 | 1  | 1  | 0         | 0                | 1       |
| AT1G65370 | 0  | 0  | 0 | 0 | 0 | -1 | -1 | 0         | 0                | -1      |
| AT1G65420 | 0  | 0  | 0 | 0 | 0 | 0  | -1 | 0         | 0                | -1      |
| AT1G65485 | 0  | 0  | 0 | 0 | 0 | 0  | 0  | 1         | 1                | 1       |
| AT1G65500 | 0  | 0  | 0 | 1 | 0 | 0  | 0  | 0         | 0                | 1       |
| AT1G65541 | 0  | 0  | 0 | 0 | 0 | -1 | 0  | 0         | 0                | -1      |
| AT1G65550 | 0  | 0  | 0 | 1 | 0 | 0  | 0  | 0         | 0                | 1       |
| AT1G65730 | -1 | 0  | 0 | 0 | 0 | 0  | 0  | 0         | 0                | -1      |
| AT1G65790 | 0  | 0  | 0 | 1 | 0 | 0  | 0  | 0         | 0                | 1       |
| AT1G65810 | 0  | 0  | 0 | 0 | 0 | 1  | 0  | 0         | 0                | 1       |
| AT1G65820 | 0  | 0  | 0 | 0 | 0 | 0  | 1  | 0         | 0                | 1       |
| AT1G65840 | 0  | 0  | 0 | 0 | 0 | 1  | 1  | 0         | 0                | 1       |
| AT1G65845 | 0  | 0  | 0 | 0 | 0 | 1  | 0  | 0         | 0                | 1       |
| AT1G65850 | 0  | 0  | 0 | 0 | 0 | 1  | 0  | 0         | 0                | 1       |
| AT1G65875 | 0  | 0  | 0 | 0 | 0 | 1  | 0  | 0         | 0                | 1       |
| AT1G65920 | 0  | 0  | 0 | 0 | 0 | 0  | 1  | 0         | 0                | 1       |
| AT1G65960 | 0  | 0  | 0 | 0 | 0 | 0  | 1  | 0         | 0                | 1       |
| AT1G65970 | 0  | 0  | 0 | 0 | 0 | 1  | 1  | 0         | 0                | 1       |
| AT1G65985 | 0  | 0  | 0 | 0 | 0 | -1 | 0  | 0         | 0                | -1      |
| AT1G66070 | 0  | 0  | 0 | 0 | 0 | 0  | 1  | 0         | 0                | 1       |

Appendix Table S1

| Name      | 1  | 2  | 3 | 4 | 5 | 6  | 7  | bes1D_Col | bes1Dpif45_pif45 | ALL_BES |
|-----------|----|----|---|---|---|----|----|-----------|------------------|---------|
| AT1G66090 | 0  | 0  | 0 | 0 | 0 | 1  | 0  | 1         | 0                | 1       |
| AT1G66160 | 1  | 1  | 1 | 0 | 0 | 0  | 0  | 0         | 0                | 1       |
| AT1G66173 | 0  | 0  | 0 | 0 | 0 | 1  | 0  | 0         | 0                | 1       |
| AT1G66180 | 0  | 0  | 1 | 0 | 0 | 0  | 0  | 0         | 0                | 1       |
| AT1G66270 | 0  | 0  | 0 | 0 | 0 | -1 | 0  | 0         | 0                | -1      |
| AT1G66350 | 1  | 0  | 0 | 0 | 0 | 0  | 1  | 0         | 0                | 1       |
| AT1G66400 | 0  | 0  | 1 | 0 | 0 | 1  | 0  | 0         | 0                | 1       |
| AT1G66430 | 0  | 0  | 0 | 0 | 0 | 0  | -1 | 0         | 0                | -1      |
| AT1G66440 | 0  | 0  | 0 | 0 | 0 | 1  | 0  | 0         | 0                | 1       |
| AT1G66450 | 0  | 0  | 0 | 0 | 0 | 1  | 0  | 0         | 0                | 1       |
| AT1G66470 | 0  | 0  | 0 | 0 | 0 | -1 | 0  | 0         | 0                | -1      |
| AT1G66600 | 0  | 0  | 0 | 0 | 0 | 0  | 0  | 1         | 1                | 1       |
| AT1G66690 | 0  | 0  | 0 | 0 | 0 | 1  | 0  | 0         | 0                | 1       |
| AT1G66700 | 0  | 0  | 0 | 0 | 0 | 1  | 0  | 1         | 1                | 1       |
| AT1G66725 | 0  | 0  | 0 | 0 | 0 | 0  | 0  | -1        | 0                | -1      |
| AT1G66800 | 0  | 0  | 0 | 0 | 0 | -1 | 0  | -1        | 0                | -1      |
| AT1G66820 | 0  | 0  | 0 | 0 | 0 | 0  | -1 | 0         | 0                | -1      |
| AT1G66870 | 0  | 0  | 0 | 0 | 0 | -1 | 0  | 0         | -1               | -1      |
| AT1G66880 | 0  | 0  | 0 | 0 | 0 | 0  | 0  | 1         | 0                | 1       |
| AT1G66890 | -1 | -1 | 0 | 0 | 0 | 0  | 0  | 0         | 0                | -1      |
| AT1G66920 | 0  | 0  | 0 | 0 | 0 | 1  | 0  | 0         | 1                | 1       |
| AT1G66940 | 0  | 0  | 0 | 0 | 0 | 0  | 0  | 1         | 0                | 1       |
| AT1G66970 | 0  | 0  | 0 | 0 | 0 | 1  | 0  | 0         | 0                | 1       |
| AT1G66990 | 0  | 0  | 0 | 0 | 0 | 1  | 0  | 0         | 0                | 1       |
| AT1G67000 | 0  | 0  | 0 | 0 | 0 | 1  | 0  | 0         | 0                | 1       |
| AT1G67030 | -1 | 0  | 0 | 0 | 0 | 0  | 0  | -1        | 0                | -1      |
| AT1G67035 | 0  | 0  | 0 | 0 | 0 | 1  | 0  | 0         | 0                | 1       |
| AT1G67050 | 0  | 0  | 1 | 0 | 0 | 0  | 0  | 0         | 0                | 1       |
| AT1G67100 | 0  | 0  | 0 | 0 | 0 | -1 | 0  | 0         | 0                | -1      |
| AT1G67105 | 0  | 0  | 0 | 0 | 0 | -1 | 0  | 0         | 0                | -1      |
| AT1G67110 | -1 | -1 | 0 | 0 | 0 | 0  | 0  | 0         | 0                | -1      |
| AT1G67148 | 0  | 0  | 0 | 0 | 0 | 1  | 0  | 0         | 0                | 1       |
| AT1G67150 | 0  | 0  | 0 | 0 | 0 | 1  | 0  | 0         | 0                | 1       |
| AT1G67160 | 0  | 0  | 0 | 0 | 0 | 1  | 0  | 0         | 0                | 1       |
| AT1G67265 | 0  | 0  | 0 | 0 | 0 | 0  | 0  | 0         | -1               | -1      |
| AT1G67330 | 0  | 0  | 0 | 0 | 0 | 0  | 1  | 0         | 0                | 1       |
| AT1G67360 | 0  | 0  | 0 | 0 | 0 | 0  | 1  | 0         | 0                | 1       |
| AT1G67365 | 0  | 0  | 0 | 0 | 0 | -1 | 0  | 0         | 0                | -1      |
| AT1G67400 | 0  | 0  | 0 | 0 | 0 | 0  | -1 | 0         | 0                | -1      |
| AT1G67520 | 0  | 0  | 0 | 0 | 0 | 1  | 0  | 0         | 0                | 1       |
| AT1G67550 | 0  | 0  | 0 | 0 | 0 | -1 | 0  | 0         | 0                | -1      |
| AT1G67600 | 0  | 0  | 0 | 0 | 0 | -1 | 0  | 0         | 0                | -1      |
| AT1G67640 | 0  | 0  | 0 | 0 | 0 | 1  | 0  | 0         | 0                | 1       |
| AT1G67700 | 0  | 0  | 0 | 0 | 0 | 0  | -1 | 0         | 0                | -1      |
| AT1G67740 | 0  | 0  | 0 | 0 | 0 | 0  | -1 | 0         | 0                | -1      |
| AT1G67750 | 0  | 1  | 0 | 0 | 0 | 0  | 0  | 0         | 0                | 1       |
| AT1G67810 | 0  | 0  | 0 | 0 | 0 | 0  | 0  | 1         | 0                | 1       |
| AT1G67830 | 0  | 0  | 0 | 0 | 0 | 0  | -1 | 0         | 0                | -1      |
| AT1G67860 | 0  | 0  | 0 | 0 | 0 | -1 | 0  | 0         | 0                | -1      |
| AT1G67870 | 0  | 0  | 0 | 0 | 0 | -1 | 0  | 0         | 0                | -1      |
| AT1G67900 | 0  | 0  | 0 | 0 | 0 | 0  | 0  | -1        | 0                | -1      |
| AT1G67910 | 0  | 0  | 0 | 0 | 0 | 0  | -1 | 0         | 0                | -1      |
| AT1G67980 | 0  | 0  | 0 | 0 | 0 | 1  | 0  | 1         | 1                | 1       |
| AT1G68190 | -1 | -1 | 0 | 0 | 0 | 0  | 0  | 0         | 0                | -1      |
| AT1G68250 | 0  | 0  | 0 | 0 | 0 | -1 | 0  | 0         | 0                | -1      |
| AT1G68260 | 0  | 0  | 0 | 0 | 0 | 0  | -1 | 0         | 0                | -1      |
| AT1G68300 | 0  | 0  | 0 | 0 | 0 | 0  | 1  | 0         | 0                | 1       |
| AT1G68350 | 0  | 0  | 0 | 0 | 0 | 1  | 0  | 0         | 0                | 1       |
| AT1G68360 | 0  | -1 | 0 | 0 | 0 | 0  | 0  | 0         | 0                | -1      |
| AT1G68410 | 1  | 1  | 1 | 0 | 0 | 0  | 0  | 0         | 0                | 1       |
| AT1G68440 | 0  | 0  | 0 | 0 | 0 | 0  | 1  | 0         | 0                | 1       |

Appendix Table S1

| Name      | 1  | 2  | 3  | 4  | 5 | 6  | 7  | bes1D_Col | bes1Dpif45_pif45 | ALL_BES |
|-----------|----|----|----|----|---|----|----|-----------|------------------|---------|
| AT1G68450 | 0  | 0  | 0  | 0  | 0 | 1  | 0  | 0         | 0                | 1       |
| AT1G68500 | 0  | 0  | 0  | 0  | 0 | 0  | -1 | 0         | 0                | -1      |
| AT1G68520 | 0  | 0  | 0  | 0  | 0 | 0  | -1 | 0         | 0                | -1      |
| AT1G68530 | 0  | 0  | 0  | 0  | 0 | 1  | 1  | 0         | 0                | 1       |
| AT1G68550 | 0  | -1 | 0  | 0  | 0 | 0  | -1 | 0         | 0                | -1      |
| AT1G68560 | -1 | -1 | 0  | 0  | 0 | 0  | 0  | 0         | 0                | -1      |
| AT1G68570 | 0  | 0  | 0  | 0  | 0 | 0  | -1 | 0         | 0                | -1      |
| AT1G68585 | 0  | 0  | 0  | 0  | 0 | -1 | -1 | 0         | 0                | -1      |
| AT1G68590 | 0  | 0  | 0  | 0  | 0 | 0  | -1 | 0         | 0                | -1      |
| AT1G68620 | 0  | 0  | 0  | 0  | 0 | 0  | 0  | 0         | 1                | 1       |
| AT1G68725 | 0  | 0  | 0  | 0  | 0 | 1  | 0  | 0         | 0                | 1       |
| AT1G68740 | 0  | 0  | 0  | 0  | 0 | 0  | 1  | 0         | 0                | 1       |
| AT1G68780 | 0  | 1  | 1  | 0  | 0 | 0  | 0  | 0         | 0                | 1       |
| AT1G68800 | 0  | 0  | 0  | 0  | 0 | 1  | 0  | 0         | 0                | 1       |
| AT1G68820 | 0  | 0  | 0  | 0  | 0 | 1  | 1  | 0         | 0                | 1       |
| AT1G68825 | 0  | 0  | 0  | 0  | 0 | -1 | 0  | 0         | 0                | -1      |
| AT1G68850 | 0  | 0  | 0  | 0  | 0 | 1  | 0  | 0         | 1                | 1       |
| AT1G69030 | 0  | 1  | 0  | 0  | 0 | 0  | 0  | 0         | 0                | 1       |
| AT1G69160 | -1 | -1 | 0  | 0  | 0 | 0  | 0  | 0         | -1               | -1      |
| AT1G69270 | 0  | 0  | -1 | 0  | 0 | 0  | 0  | 0         | 0                | -1      |
| AT1G69310 | 0  | 0  | 0  | 0  | 0 | 0  | 1  | 0         | 0                | 1       |
| AT1G69390 | 0  | 0  | 0  | 0  | 0 | 0  | -1 | 0         | 0                | -1      |
| AT1G69400 | 0  | 0  | 0  | 0  | 0 | 0  | -1 | 0         | 0                | -1      |
| AT1G69410 | -1 | -1 | 0  | 0  | 0 | -1 | -1 | 0         | 0                | -1      |
| AT1G69480 | 0  | 0  | 0  | 0  | 0 | 1  | 0  | 0         | 0                | 1       |
| AT1G69490 | 1  | 1  | 0  | 0  | 0 | 1  | 0  | 0         | 1                | 1       |
| AT1G69530 | 0  | 0  | 0  | 0  | 0 | 1  | 1  | 0         | 0                | 1       |
| AT1G69570 | 0  | 0  | 0  | 0  | 0 | 0  | 1  | 0         | 0                | 1       |
| AT1G69690 | 0  | 0  | 0  | 0  | 0 | 0  | -1 | 0         | 0                | -1      |
| AT1G69700 | 0  | 0  | 0  | 0  | 0 | -1 | -1 | 0         | 0                | -1      |
| AT1G69740 | 0  | 0  | 0  | 0  | 0 | 0  | -1 | 0         | 0                | -1      |
| AT1G69780 | 0  | -1 | 0  | 0  | 0 | 0  | 0  | 0         | 0                | -1      |
| AT1G69800 | 0  | 0  | -1 | 0  | 0 | 0  | 0  | 0         | 0                | -1      |
| AT1G69840 | 0  | 0  | 0  | 0  | 0 | 0  | 1  | 0         | 0                | 1       |
| AT1G69870 | -1 | -1 | -1 | 0  | 0 | 0  | 0  | 0         | 0                | -1      |
| AT1G69890 | 1  | 0  | 0  | 0  | 0 | 1  | 0  | 0         | 0                | 1       |
| AT1G69920 | 0  | 0  | 0  | 0  | 0 | 1  | 0  | 1         | 0                | 1       |
| AT1G69935 | 0  | 0  | 0  | 0  | 0 | 0  | -1 | 0         | 0                | -1      |
| AT1G69950 | 0  | 0  | 0  | 0  | 0 | 0  | -1 | 0         | 0                | -1      |
| AT1G70000 | 0  | 0  | 0  | 1  | 0 | 0  | 0  | 0         | 0                | 1       |
| AT1G70090 | 0  | 0  | 0  | 0  | 0 | 0  | -1 | 0         | 0                | -1      |
| AT1G70130 | 0  | 0  | 0  | 0  | 0 | 1  | 0  | 0         | 0                | 1       |
| AT1G70210 | 0  | -1 | 0  | 0  | 0 | 0  | 0  | 0         | 0                | -1      |
| AT1G70230 | 0  | 0  | 0  | 1  | 0 | 0  | 0  | 0         | 0                | 1       |
| AT1G70270 | 0  | 0  | 0  | 0  | 0 | 0  | 1  | 0         | 0                | 1       |
| AT1G70300 | -1 | -1 | 0  | -1 | 0 | 0  | 0  | 0         | 0                | -1      |
| AT1G70310 | 0  | 0  | 0  | 0  | 0 | 0  | -1 | 0         | 0                | -1      |
| AT1G70340 | 0  | 0  | 0  | 0  | 0 | 1  | 0  | 0         | 0                | 1       |
| AT1G70370 | 0  | 1  | 0  | 0  | 0 | 0  | 1  | 0         | 0                | 1       |
| AT1G70460 | 0  | 0  | 0  | 0  | 0 | 1  | 0  | 0         | 0                | 1       |
| AT1G70470 | 0  | 0  | 0  | 0  | 0 | 0  | 1  | 0         | 0                | 1       |
| AT1G70530 | -1 | 0  | -1 | 0  | 0 | 0  | 0  | 0         | 0                | -1      |
| AT1G70560 | 0  | 0  | 0  | 0  | 0 | 0  | 1  | 0         | 0                | 1       |
| AT1G70680 | 0  | 0  | 0  | 0  | 0 | 1  | 0  | 0         | 0                | 1       |
| AT1G70700 | 0  | 0  | 1  | 0  | 0 | 0  | 0  | 0         | 0                | 1       |
| AT1G70710 | 0  | 0  | 0  | 0  | 0 | 0  | 1  | 0         | 0                | 1       |
| AT1G70750 | 0  | 0  | 0  | 0  | 0 | 0  | 1  | 0         | 0                | 1       |
| AT1G70830 | 0  | -1 | 0  | 0  | 0 | 0  | 0  | 0         | 0                | -1      |
| AT1G70850 | 0  | 0  | 0  | 0  | 0 | 0  | 1  | 0         | 0                | 1       |
| AT1G70885 | 0  | 0  | 0  | 0  | 0 | 0  | 0  | 0         | -1               | -1      |
| AT1G70890 | 0  | 0  | 0  | 0  | 0 | -1 | 0  | -1        | 0                | -1      |

Appendix Table S1

| Name      | 1  | 2  | 3  | 4  | 5 | 6  | 7  | bes1D_Col | bes1Dpif45_pif45 | ALL_BES |
|-----------|----|----|----|----|---|----|----|-----------|------------------|---------|
| AT1G70940 | -1 | -1 | 0  | 0  | 0 | 0  | 0  | 0         | 0                | -1      |
| AT1G70985 | 0  | 0  | 0  | 0  | 0 | 0  | 0  | 0         | 1                | 1       |
| AT1G70990 | 0  | 0  | 0  | 0  | 0 | 1  | 1  | 0         | 0                | 1       |
| AT1G71030 | -1 | 0  | 0  | -1 | 0 | 0  | 0  | 0         | 0                | -1      |
| AT1G71040 | 0  | 0  | 0  | 0  | 0 | 0  | 1  | 0         | 0                | 1       |
| AT1G71180 | 0  | 0  | 0  | 0  | 0 | 0  | -1 | 0         | 0                | -1      |
| AT1G71250 | 0  | 0  | 0  | 0  | 0 | -1 | 0  | 0         | 0                | -1      |
| AT1G71260 | 0  | 0  | 0  | 0  | 0 | 0  | -1 | 0         | 0                | -1      |
| AT1G71310 | 0  | 0  | 0  | 0  | 0 | 0  | -1 | 0         | 0                | -1      |
| AT1G71380 | 0  | 0  | 0  | 0  | 0 | 1  | 0  | 0         | 0                | 1       |
| AT1G71440 | 0  | 0  | -1 | 0  | 0 | 0  | 0  | 0         | 0                | -1      |
| AT1G71500 | 0  | 0  | 0  | 0  | 0 | 0  | -1 | 0         | 0                | -1      |
| AT1G71692 | 0  | 0  | 0  | 0  | 0 | -1 | 0  | 0         | -1               | -1      |
| AT1G71697 | 0  | 1  | 0  | 0  | 0 | 0  | 1  | 0         | 0                | 1       |
| AT1G71710 | 0  | 0  | 0  | 0  | 0 | 0  | 1  | 0         | 0                | 1       |
| AT1G71740 | 0  | 0  | 0  | 0  | 0 | 1  | 1  | 0         | 0                | 1       |
| AT1G71790 | 0  | 0  | 0  | 0  | 0 | 0  | -1 | 0         | 0                | -1      |
| AT1G71880 | 0  | 0  | 0  | 1  | 0 | 1  | 0  | 0         | 0                | 1       |
| AT1G71960 | 0  | 0  | 0  | 0  | 0 | 0  | -1 | 0         | 0                | -1      |
| AT1G71990 | 0  | 0  | 0  | 0  | 0 | 0  | -1 | 0         | 0                | -1      |
| AT1G72030 | 0  | 0  | -1 | 0  | 0 | 0  | -1 | 0         | 0                | -1      |
| AT1G72040 | 0  | 0  | 0  | 0  | 0 | 0  | -1 | 0         | 0                | -1      |
| AT1G72090 | 0  | 0  | 0  | 0  | 0 | 0  | -1 | 0         | 0                | -1      |
| AT1G72150 | 0  | 0  | 0  | 0  | 0 | 0  | 1  | 0         | 0                | 1       |
| AT1G72160 | 0  | 0  | 0  | 0  | 0 | 0  | 1  | 0         | 0                | 1       |
| AT1G72180 | -1 | -1 | -1 | 0  | 0 | -1 | -1 | 0         | 0                | -1      |
| AT1G72210 | 0  | 0  | 0  | 0  | 0 | -1 | 0  | 0         | 0                | -1      |
| AT1G72230 | 0  | 0  | 0  | 0  | 0 | 1  | 1  | 0         | 0                | 1       |
| AT1G72240 | 0  | 0  | 0  | 0  | 0 | 1  | 0  | 0         | 0                | 1       |
| AT1G72290 | 0  | 0  | 0  | 0  | 0 | 1  | 0  | 0         | 0                | 1       |
| AT1G72340 | 0  | 0  | 0  | 0  | 0 | 0  | -1 | 0         | 0                | -1      |
| AT1G72430 | 0  | 1  | 1  | 0  | 0 | 1  | 1  | 0         | 0                | 1       |
| AT1G72450 | 0  | 0  | 0  | 0  | 0 | 1  | 1  | 0         | 0                | 1       |
| AT1G72470 | 0  | 1  | 0  | 0  | 0 | 0  | 1  | 0         | 0                | 1       |
| AT1G72500 | 0  | 1  | 0  | 0  | 0 | 0  | 0  | 0         | 0                | 1       |
| AT1G72610 | 0  | 0  | 0  | 0  | 0 | -1 | -1 | -1        | -1               | -1      |
| AT1G72680 | -1 | 0  | 0  | 0  | 0 | 0  | 0  | 0         | 0                | -1      |
| AT1G72790 | 1  | 1  | 0  | 0  | 0 | 0  | 0  | 0         | 0                | 1       |
| AT1G72890 | 0  | 0  | 0  | 0  | 0 | 0  | 0  | 0         | 1                | 1       |
| AT1G72930 | 0  | 0  | 0  | 0  | 0 | 0  | 0  | 0         | 1                | 1       |
| AT1G72940 | -1 | 0  | 0  | 0  | 0 | -1 | 0  | 0         | 0                | -1      |
| AT1G73040 | 0  | 0  | 0  | 0  | 0 | 1  | 0  | 0         | 0                | 1       |
| AT1G73060 | 0  | 0  | 0  | 0  | 0 | 0  | -1 | 0         | 0                | -1      |
| AT1G73090 | 0  | 0  | 0  | 0  | 0 | 0  | -1 | 0         | 0                | -1      |
| AT1G73120 | 0  | 0  | 0  | 0  | 0 | 1  | 1  | 0         | 0                | 1       |
| AT1G73250 | 0  | 0  | 0  | 0  | 0 | 0  | -1 | 0         | 0                | -1      |
| AT1G73300 | 0  | 0  | 0  | 0  | 0 | 0  | 1  | 0         | 0                | 1       |
| AT1G73370 | 0  | 0  | 0  | 0  | 0 | 0  | 0  | 0         | 1                | 1       |
| AT1G73380 | 0  | 0  | -1 | 0  | 0 | 0  | -1 | 0         | 0                | -1      |
| AT1G73390 | 0  | 0  | 0  | 0  | 0 | 0  | 1  | 0         | 0                | 1       |
| AT1G73410 | 0  | 0  | 0  | 0  | 0 | 1  | 0  | 0         | 0                | 1       |
| AT1G73470 | 0  | 0  | 0  | 0  | 0 | 0  | -1 | 0         | 0                | -1      |
| AT1G73480 | -1 | 0  | 0  | 0  | 0 | 0  | 0  | 0         | 0                | -1      |
| AT1G73530 | 0  | 0  | 0  | 0  | 0 | 0  | -1 | 0         | 0                | -1      |
| AT1G73620 | -1 | -1 | 0  | 0  | 0 | -1 | 0  | 0         | 0                | -1      |
| AT1G73630 | 0  | 0  | 0  | 0  | 0 | 0  | -1 | 0         | 0                | -1      |
| AT1G73640 | 0  | 0  | 0  | 0  | 0 | 1  | 1  | 0         | 0                | 1       |
| AT1G73650 | 0  | 0  | 0  | 0  | 0 | 0  | -1 | 0         | 0                | -1      |
| AT1G73655 | 0  | 0  | 0  | 0  | 0 | 0  | -1 | 0         | 0                | -1      |
| AT1G73805 | 0  | 0  | 0  | 0  | 0 | 0  | 0  | 1         | 0                | 1       |
| AT1G73840 | 0  | 0  | -1 | 0  | 0 | 0  | 0  | 0         | 0                | -1      |



Appendix Table S1

| Name      | 1  | 2  | 3  | 4  | 5 | 6  | 7  | bes1D_Col | bes1Dpif45_pif45 | ALL_BES |
|-----------|----|----|----|----|---|----|----|-----------|------------------|---------|
| AT1G73965 | 0  | 0  | 0  | 0  | 0 | 1  | 0  | 0         | 0                | 1       |
| AT1G74010 | 0  | 0  | 0  | 0  | 0 | 1  | 0  | 0         | 0                | 1       |
| AT1G74020 | 0  | 0  | 0  | 0  | 0 | 0  | 1  | 0         | 0                | 1       |
| AT1G74080 | 0  | 0  | 0  | 0  | 0 | 1  | 0  | 0         | 0                | 1       |
| AT1G74090 | -1 | -1 | 0  | 0  | 0 | 0  | 0  | 0         | 0                | -1      |
| AT1G74100 | 0  | 0  | 0  | 0  | 0 | 0  | 1  | 0         | 0                | 1       |
| AT1G74110 | 0  | 0  | 0  | 0  | 0 | 0  | 0  | 1         | 1                | 1       |
| AT1G74150 | 0  | 0  | 0  | 0  | 0 | -1 | 0  | 0         | 0                | -1      |
| AT1G74210 | 0  | 0  | 0  | 0  | 0 | 0  | 1  | 0         | 0                | 1       |
| AT1G74290 | 0  | 0  | 1  | 0  | 0 | 0  | 0  | 0         | 0                | 1       |
| AT1G74360 | 0  | 0  | 0  | 0  | 0 | 1  | 0  | 0         | 0                | 1       |
| AT1G74370 | 0  | 0  | 0  | 0  | 0 | 0  | -1 | 0         | 0                | -1      |
| AT1G74380 | 0  | 1  | 1  | 0  | 0 | 0  | 0  | 0         | 0                | 1       |
| AT1G74410 | 0  | 0  | 0  | 0  | 0 | 0  | 1  | 0         | 0                | 1       |
| AT1G74460 | 0  | 0  | 0  | 0  | 0 | 1  | 0  | 1         | 1                | 1       |
| AT1G74470 | 0  | 0  | 0  | 0  | 0 | 0  | -1 | 0         | 0                | -1      |
| AT1G74500 | -1 | -1 | 0  | 0  | 0 | -1 | 0  | 0         | 0                | -1      |
| AT1G74650 | 0  | 0  | 0  | 1  | 0 | 0  | 0  | 0         | 1                | 1       |
| AT1G74660 | 0  | 0  | 0  | 0  | 0 | 1  | 1  | 0         | 0                | 1       |
| AT1G74670 | 0  | 0  | 0  | 0  | 0 | 1  | 0  | 0         | 0                | 1       |
| AT1G74690 | 0  | 0  | 0  | 0  | 0 | 0  | 1  | 0         | 0                | 1       |
| AT1G74710 | 0  | 0  | 0  | 0  | 0 | 1  | 0  | 0         | 0                | 1       |
| AT1G74730 | 0  | 0  | 0  | 0  | 0 | 0  | -1 | -1        | 0                | -1      |
| AT1G74740 | 0  | 0  | 0  | 0  | 0 | 0  | 1  | 0         | 0                | 1       |
| AT1G74780 | 0  | 0  | 0  | 0  | 0 | 0  | -1 | 0         | 0                | -1      |
| AT1G74890 | 0  | 0  | 1  | 0  | 0 | 0  | 0  | 0         | 0                | 1       |
| AT1G74910 | 0  | 0  | 0  | 0  | 0 | 0  | -1 | 0         | 0                | -1      |
| AT1G74920 | 0  | 0  | 0  | 0  | 0 | 0  | -1 | 0         | 0                | -1      |
| AT1G74970 | 0  | 0  | 0  | 0  | 0 | 0  | -1 | 0         | 0                | -1      |
| AT1G75000 | 0  | 0  | 0  | 0  | 0 | 1  | 0  | 0         | 1                | 1       |
| AT1G75030 | 0  | 0  | 0  | 0  | 0 | 0  | 0  | 0         | 1                | 1       |
| AT1G75080 | 1  | 1  | 1  | 0  | 0 | 0  | 0  | 0         | 0                | 1       |
| AT1G75180 | 0  | 0  | 0  | 0  | 0 | 0  | -1 | 0         | 0                | -1      |
| AT1G75240 | 1  | 1  | 0  | 0  | 0 | 0  | 0  | 0         | 0                | 1       |
| AT1G75330 | 0  | 0  | 0  | 0  | 0 | 0  | -1 | 0         | 0                | -1      |
| AT1G75350 | 0  | 0  | 0  | 0  | 0 | 0  | -1 | 0         | 0                | -1      |
| AT1G75440 | 0  | 0  | 0  | 0  | 0 | 0  | 1  | 0         | 0                | 1       |
| AT1G75450 | 0  | 0  | 0  | 0  | 0 | 0  | -1 | 0         | 0                | -1      |
| AT1G75460 | -1 | 0  | -1 | 0  | 0 | 0  | 0  | -1        | 0                | -1      |
| AT1G75500 | -1 | -1 | 0  | 0  | 0 | 0  | 0  | 0         | -1               | -1      |
| AT1G75520 | 0  | 0  | 0  | 0  | 0 | -1 | 0  | 0         | 0                | -1      |
| AT1G75550 | 0  | 0  | 0  | 0  | 0 | 1  | 0  | 0         | 0                | 1       |
| AT1G75580 | -1 | 0  | 0  | 0  | 0 | 0  | 0  | 0         | 0                | -1      |
| AT1G75590 | 0  | 0  | 0  | 0  | 0 | 0  | -1 | 0         | 0                | -1      |
| AT1G75600 | 0  | 0  | 0  | 0  | 0 | 0  | -1 | 0         | 0                | -1      |
| AT1G75610 | 0  | 0  | 0  | 0  | 0 | 0  | -1 | 0         | 0                | -1      |
| AT1G75640 | 0  | 0  | 0  | 0  | 0 | 1  | 0  | 0         | 0                | 1       |
| AT1G75680 | 0  | 0  | 1  | 0  | 0 | 0  | 0  | 0         | 0                | 1       |
| AT1G75690 | 0  | 0  | 0  | 0  | 0 | 0  | -1 | 0         | 0                | -1      |
| AT1G75770 | 0  | 0  | 0  | 0  | 0 | -1 | 0  | 0         | 0                | -1      |
| AT1G75780 | 0  | 1  | 0  | 0  | 0 | 0  | 1  | 0         | 0                | 1       |
| AT1G75820 | 0  | 0  | 0  | 0  | 0 | 0  | -1 | 0         | 0                | -1      |
| AT1G75830 | 0  | 0  | 0  | -1 | 0 | 0  | 0  | 0         | 0                | -1      |
| AT1G75900 | 0  | 0  | 0  | 0  | 0 | 1  | 1  | 0         | 0                | 1       |
| AT1G75920 | 0  | 0  | 0  | 0  | 0 | 1  | 0  | 0         | 0                | 1       |
| AT1G76080 | 0  | 0  | 0  | 0  | 0 | 0  | -1 | -1        | 0                | -1      |
| AT1G76090 | 0  | 0  | 0  | 0  | 0 | 0  | 1  | 0         | 0                | 1       |
| AT1G76100 | 0  | 0  | 0  | 0  | 0 | 0  | -1 | 0         | 0                | -1      |
| AT1G76160 | 1  | 1  | 1  | 0  | 0 | 0  | 1  | 0         | 0                | 1       |
| AT1G76180 | 0  | 0  | 0  | 0  | 0 | 1  | 1  | 0         | 0                | 1       |
| AT1G76220 | 0  | 0  | 0  | 0  | 0 | -1 | 0  | 0         | 0                | -1      |

Appendix Table S1

| Name      | 1  | 2  | 3  | 4  | 5  | 6  | 7  | bes1D_Col | bes1Dpif45_pif45 | ALL_BES |
|-----------|----|----|----|----|----|----|----|-----------|------------------|---------|
| AT1G76300 | 0  | 0  | -1 | 0  | 0  | 0  | 0  | 0         | 0                | -1      |
| AT1G76310 | 0  | 0  | 0  | 0  | 0  | 1  | 0  | 0         | 0                | 1       |
| AT1G76360 | 0  | 0  | 0  | 0  | 0  | 1  | 0  | 0         | 0                | 1       |
| AT1G76405 | 0  | 0  | 0  | 0  | 0  | 0  | -1 | 0         | 0                | -1      |
| AT1G76430 | 0  | 0  | 0  | 0  | 0  | 1  | 0  | 0         | 0                | 1       |
| AT1G76500 | -1 | -1 | 0  | 0  | 0  | 0  | 0  | 0         | 0                | -1      |
| AT1G76540 | 0  | 0  | 0  | 0  | 0  | 1  | 1  | 0         | 0                | 1       |
| AT1G76550 | 0  | 0  | 0  | 0  | 0  | 0  | 1  | 0         | 0                | 1       |
| AT1G76670 | 0  | 1  | 1  | 0  | 0  | 0  | 0  | 0         | 0                | 1       |
| AT1G76680 | 0  | 0  | 0  | 1  | 0  | 0  | 0  | 1         | 0                | 1       |
| AT1G76690 | 1  | 1  | 0  | 0  | 0  | 0  | 0  | 0         | 0                | 1       |
| AT1G76730 | 0  | 0  | 0  | 0  | 0  | 0  | -1 | 0         | 0                | -1      |
| AT1G76740 | 0  | 0  | 0  | 0  | 0  | 1  | 0  | 0         | 0                | 1       |
| AT1G76890 | 0  | 1  | 0  | 0  | 0  | 0  | 0  | 0         | 0                | 1       |
| AT1G77090 | 0  | 0  | 0  | 0  | 0  | 0  | -1 | 0         | 0                | -1      |
| AT1G77130 | 0  | 0  | 0  | 0  | 0  | 0  | 1  | 0         | 0                | 1       |
| AT1G77260 | 0  | 0  | 0  | 0  | 0  | 0  | 1  | 0         | 0                | 1       |
| AT1G77280 | 0  | 0  | 0  | 0  | 0  | 0  | 1  | 0         | 0                | 1       |
| AT1G77330 | 0  | 0  | 0  | 0  | 0  | 0  | 1  | 0         | 0                | 1       |
| AT1G77380 | 0  | -1 | 0  | -1 | 0  | 0  | 0  | 0         | 0                | -1      |
| AT1G77420 | 0  | 0  | 0  | 0  | 0  | 0  | 1  | 0         | 0                | 1       |
| AT1G77490 | 0  | 0  | 0  | 0  | 0  | 0  | -1 | 0         | 0                | -1      |
| AT1G77500 | 0  | 0  | 0  | 0  | 0  | 0  | 1  | 0         | 0                | 1       |
| AT1G77630 | 0  | 0  | 0  | 0  | 0  | 0  | -1 | 0         | 0                | -1      |
| AT1G77640 | 0  | 0  | 0  | 0  | 0  | 0  | -1 | 0         | 0                | -1      |
| AT1G77690 | -1 | 0  | 0  | 0  | 0  | 0  | 0  | 0         | 0                | -1      |
| AT1G77710 | 0  | 0  | 0  | 0  | 0  | 0  | -1 | 0         | 0                | -1      |
| AT1G77740 | 0  | 0  | 0  | 0  | 0  | 0  | 1  | 0         | 0                | 1       |
| AT1G77760 | -1 | 0  | 0  | -1 | -1 | 0  | 0  | 0         | 0                | -1      |
| AT1G77765 | 0  | 0  | 0  | 0  | 0  | 1  | 0  | 0         | 0                | 1       |
| AT1G77870 | 0  | 1  | 0  | 0  | 0  | 0  | 0  | 0         | 0                | 1       |
| AT1G77920 | 0  | 0  | 0  | 0  | 0  | 0  | 1  | 0         | 0                | 1       |
| AT1G77950 | 0  | 0  | 0  | 0  | 0  | 1  | 0  | 0         | 0                | 1       |
| AT1G77990 | 0  | 1  | 0  | 0  | 0  | 0  | 0  | 0         | 1                | 1       |
| AT1G78010 | 0  | 0  | 0  | 0  | 0  | 0  | -1 | 0         | 0                | -1      |
| AT1G78070 | 0  | 1  | 1  | 0  | 0  | 0  | 0  | 0         | 0                | 1       |
| AT1G78080 | 0  | 0  | 0  | 0  | 0  | 0  | -1 | 0         | 0                | -1      |
| AT1G78090 | 0  | 0  | 0  | -1 | 0  | 0  | 0  | 0         | 0                | -1      |
| AT1G78120 | 0  | 0  | 0  | 0  | 0  | 0  | 1  | 0         | 0                | 1       |
| AT1G78170 | 0  | 0  | 1  | 0  | 0  | 0  | 0  | 0         | 0                | 1       |
| AT1G78230 | 0  | 0  | 0  | 0  | 0  | 1  | 0  | 0         | 0                | 1       |
| AT1G78240 | 1  | 1  | 1  | 0  | 0  | 0  | 0  | 0         | 0                | 1       |
| AT1G78260 | 0  | 1  | 1  | 0  | 0  | 0  | 1  | 0         | 0                | 1       |
| AT1G78290 | 0  | 0  | 0  | 0  | 0  | 0  | 1  | 0         | 0                | 1       |
| AT1G78300 | 0  | 0  | 0  | 0  | 0  | 0  | 1  | 0         | 0                | 1       |
| AT1G78320 | 0  | 0  | 0  | 0  | 0  | -1 | 0  | 0         | 0                | -1      |
| AT1G78370 | -1 | 0  | 0  | 0  | 0  | 0  | 0  | 0         | 0                | -1      |
| AT1G78410 | 0  | 0  | 0  | 0  | 0  | 0  | 0  | 1         | 0                | 1       |
| AT1G78460 | 0  | 0  | 0  | 0  | 0  | 0  | 0  | 1         | 0                | 1       |
| AT1G78490 | 0  | 0  | 0  | 1  | 0  | 0  | 0  | 0         | 0                | 1       |
| AT1G78630 | 0  | 0  | 0  | 0  | 0  | 0  | -1 | 0         | 0                | -1      |
| AT1G78660 | 0  | 0  | 0  | 0  | 0  | 0  | 1  | 0         | 0                | 1       |
| AT1G78670 | 0  | 0  | 0  | 0  | 0  | 0  | 1  | 0         | 0                | 1       |
| AT1G78830 | 0  | 0  | 0  | 0  | 0  | 1  | 1  | 0         | 0                | 1       |
| AT1G78850 | 0  | 0  | 0  | 0  | 0  | 1  | 1  | 0         | 1                | 1       |
| AT1G78860 | 0  | 0  | 0  | 1  | 0  | 1  | 1  | 0         | 0                | 1       |
| AT1G78890 | 0  | 0  | -1 | 0  | 0  | 0  | 0  | 0         | 0                | -1      |
| AT1G78970 | 1  | 1  | 0  | 0  | 0  | 0  | 1  | 0         | 0                | 1       |
| AT1G79040 | 0  | 0  | 0  | 0  | 0  | 0  | -1 | 0         | 0                | -1      |
| AT1G79080 | 0  | 0  | -1 | 0  | 0  | 0  | 0  | 0         | 0                | -1      |
| AT1G79270 | 0  | 0  | 0  | 0  | 0  | 0  | 1  | 0         | 0                | 1       |

Appendix Table S1

| Name      | 1  | 2  | 3  | 4  | 5 | 6  | 7  | bes1D_Col | bes1Dpif45_pif45 | ALL_BES |
|-----------|----|----|----|----|---|----|----|-----------|------------------|---------|
| AT1G79330 | 0  | 0  | 0  | 0  | 0 | 1  | 0  | 0         | 0                | 1       |
| AT1G79340 | 0  | 0  | 0  | 0  | 0 | 0  | 1  | 0         | 0                | 1       |
| AT1G79360 | 0  | 0  | 0  | 0  | 0 | 0  | -1 | 0         | 0                | -1      |
| AT1G79380 | 0  | 0  | 0  | 0  | 0 | 0  | 1  | 0         | 0                | 1       |
| AT1G79450 | 0  | 0  | 0  | 1  | 0 | 0  | 0  | 0         | 0                | 1       |
| AT1G79490 | 0  | 0  | 0  | 0  | 0 | 0  | -1 | 0         | 0                | -1      |
| AT1G79580 | 0  | 0  | 0  | 0  | 0 | -1 | 0  | 0         | 0                | -1      |
| AT1G79590 | 0  | 0  | 0  | 0  | 0 | 0  | 1  | 0         | 0                | 1       |
| AT1G79630 | -1 | -1 | 0  | 0  | 0 | 0  | 0  | 0         | 0                | -1      |
| AT1G79660 | 0  | 1  | 0  | 0  | 0 | 0  | 0  | 0         | 0                | 1       |
| AT1G79680 | 0  | 0  | 0  | 0  | 0 | 0  | 0  | 1         | 1                | 1       |
| AT1G79750 | 0  | 0  | 0  | 0  | 0 | 0  | -1 | 0         | 0                | -1      |
| AT1G79790 | 0  | 0  | 0  | 0  | 0 | 0  | -1 | 0         | 0                | -1      |
| AT1G79810 | 0  | 0  | -1 | 0  | 0 | 0  | 0  | 0         | 0                | -1      |
| AT1G79850 | 0  | 0  | 0  | 0  | 0 | 0  | -1 | 0         | 0                | -1      |
| AT1G79920 | 0  | 0  | 0  | 0  | 0 | 0  | 1  | 0         | 0                | 1       |
| AT1G79930 | 0  | 0  | 0  | 0  | 0 | 0  | 1  | 0         | 0                | 1       |
| AT1G80050 | -1 | 0  | 0  | 0  | 0 | -1 | -1 | 0         | -1               | -1      |
| AT1G80100 | 0  | 0  | 0  | 0  | 0 | -1 | 0  | 0         | 0                | -1      |
| AT1G80130 | -1 | -1 | 0  | 0  | 0 | -1 | 0  | 0         | 0                | -1      |
| AT1G80240 | 0  | 0  | 0  | 0  | 0 | 1  | 1  | 1         | 1                | 1       |
| AT1G80280 | 1  | 1  | 0  | 0  | 0 | 1  | 1  | 0         | 0                | 1       |
| AT1G80360 | 0  | 0  | 0  | 0  | 0 | 0  | 1  | 0         | 0                | 1       |
| AT1G80390 | 0  | 0  | 0  | 1  | 0 | 0  | 0  | 0         | 0                | 1       |
| AT1G80480 | 0  | 0  | 0  | 0  | 0 | 0  | -1 | 0         | 0                | -1      |
| AT1G80530 | 0  | 0  | 0  | 0  | 0 | 0  | -1 | 0         | 0                | -1      |
| AT1G80560 | 0  | 0  | 0  | 0  | 0 | 0  | -1 | 0         | 0                | -1      |
| AT1G80630 | 0  | 0  | 0  | 0  | 0 | 0  | -1 | 0         | 0                | -1      |
| AT1G80770 | 0  | 0  | -1 | 0  | 0 | 0  | 0  | 0         | 0                | -1      |
| AT1G80840 | -1 | -1 | 0  | 0  | 0 | 0  | 0  | 0         | 0                | -1      |
| AT1G80850 | 0  | 0  | -1 | 0  | 0 | 0  | 0  | 0         | 0                | -1      |
| AT1G80860 | 0  | 0  | 0  | 0  | 0 | 0  | -1 | 0         | 0                | -1      |
| AT2G01080 | 0  | 0  | 0  | 0  | 0 | 0  | -1 | 0         | 0                | -1      |
| AT2G01090 | 0  | 0  | 0  | 0  | 0 | 0  | -1 | 0         | 0                | -1      |
| AT2G01110 | 0  | 0  | -1 | 0  | 0 | 0  | -1 | 0         | 0                | -1      |
| AT2G01150 | 0  | 0  | -1 | 0  | 0 | 0  | 0  | 0         | 0                | -1      |
| AT2G01180 | 0  | 1  | 0  | 0  | 0 | 0  | 0  | 1         | 0                | 1       |
| AT2G01190 | 1  | 1  | 0  | 0  | 0 | 0  | 0  | 0         | 0                | 1       |
| AT2G01200 | 0  | 0  | 0  | 0  | 0 | 1  | 0  | 0         | 0                | 1       |
| AT2G01220 | 0  | 0  | 0  | 0  | 0 | 0  | -1 | 0         | 0                | -1      |
| AT2G01290 | 0  | 0  | 0  | 0  | 0 | 0  | -1 | 0         | 0                | -1      |
| AT2G01300 | 1  | 1  | 0  | 0  | 0 | 0  | 0  | 0         | 0                | 1       |
| AT2G01420 | -1 | -1 | -1 | 0  | 0 | 0  | -1 | 0         | 0                | -1      |
| AT2G01460 | 0  | 0  | 0  | 0  | 0 | 0  | 1  | 0         | 0                | 1       |
| AT2G01520 | 0  | 0  | 0  | 0  | 0 | -1 | 0  | 0         | 0                | -1      |
| AT2G01530 | 0  | 0  | 0  | 0  | 0 | 0  | 1  | 0         | 0                | 1       |
| AT2G01580 | 0  | 0  | 0  | 0  | 0 | 0  | -1 | 0         | 0                | -1      |
| AT2G01590 | 0  | 0  | 0  | 0  | 0 | 0  | -1 | 0         | 0                | -1      |
| AT2G01630 | 0  | 0  | 0  | 0  | 0 | 0  | -1 | 0         | 0                | -1      |
| AT2G01650 | 0  | 0  | 0  | 1  | 0 | 0  | 0  | 0         | 0                | 1       |
| AT2G01660 | 0  | 0  | 0  | 0  | 0 | 0  | 1  | 0         | 0                | 1       |
| AT2G01670 | 0  | 0  | 0  | 1  | 0 | 0  | 0  | 0         | 0                | 1       |
| AT2G01770 | 0  | 0  | 0  | 0  | 0 | 1  | 0  | 0         | 0                | 1       |
| AT2G01790 | 0  | 0  | 0  | 1  | 0 | 0  | 0  | 0         | 0                | 1       |
| AT2G01830 | 0  | 0  | 0  | 0  | 0 | 0  | 1  | 0         | 0                | 1       |
| AT2G01850 | 0  | 0  | 0  | 0  | 0 | 0  | 1  | 0         | 0                | 1       |
| AT2G01910 | 0  | 0  | 0  | 0  | 0 | 0  | 1  | 0         | 0                | 1       |
| AT2G02020 | 0  | 0  | 0  | 0  | 0 | -1 | 0  | 0         | 0                | -1      |
| AT2G02070 | -1 | -1 | 0  | 0  | 0 | 0  | 0  | 0         | 0                | -1      |
| AT2G02120 | 0  | 0  | 0  | 0  | 0 | -1 | 0  | 0         | 0                | -1      |
| AT2G02160 | 0  | 0  | 0  | -1 | 0 | 0  | 0  | 0         | 0                | -1      |



Appendix Table S1

| Name      | 1  | 2  | 3  | 4  | 5 | 6  | 7  | bes1D_Col | bes1Dpif45_pif45 | ALL_BES |
|-----------|----|----|----|----|---|----|----|-----------|------------------|---------|
| AT2G07727 | 0  | 0  | 0  | 0  | 0 | 0  | -1 | 0         | 0                | -1      |
| AT2G11300 | 0  | 0  | 0  | 0  | 0 | 1  | 0  | 0         | 0                | 1       |
| AT2G11520 | 0  | 0  | 0  | 0  | 0 | 0  | 1  | 0         | 0                | 1       |
| AT2G11790 | 0  | 0  | 0  | 0  | 0 | 1  | 0  | 0         | 0                | 1       |
| AT2G11810 | 0  | 0  | 0  | 0  | 0 | 1  | 1  | 1         | 0                | 1       |
| AT2G12190 | 0  | 0  | 0  | 0  | 0 | -1 | 0  | 0         | 0                | -1      |
| AT2G12200 | 0  | 0  | 0  | 0  | 0 | 0  | -1 | 0         | 0                | -1      |
| AT2G12210 | 0  | 0  | 0  | 1  | 0 | 0  | 0  | 0         | 0                | 1       |
| AT2G12230 | 0  | 0  | 0  | 0  | 0 | 0  | -1 | 0         | 0                | -1      |
| AT2G12280 | 0  | 0  | 0  | 0  | 0 | 0  | -1 | 0         | 0                | -1      |
| AT2G12400 | 0  | 0  | 0  | 0  | 0 | 0  | 1  | 0         | 0                | 1       |
| AT2G12462 | 0  | 0  | 0  | 0  | 0 | 1  | 0  | 0         | 0                | 1       |
| AT2G13440 | 0  | 0  | -1 | 0  | 0 | 0  | 0  | 0         | 0                | -1      |
| AT2G13790 | 0  | 0  | 0  | 1  | 0 | 0  | 0  | 0         | 1                | 1       |
| AT2G13840 | 0  | 0  | 0  | 0  | 0 | 0  | -1 | 0         | 0                | -1      |
| AT2G14060 | 0  | 0  | 0  | 0  | 0 | 0  | 0  | -1        | 0                | -1      |
| AT2G14100 | 0  | 0  | 1  | 0  | 0 | 0  | 0  | 0         | 0                | 1       |
| AT2G14160 | 0  | 0  | 0  | 0  | 0 | 1  | 0  | 0         | 0                | 1       |
| AT2G14300 | 0  | 0  | 0  | 1  | 0 | 0  | 0  | 0         | 0                | 1       |
| AT2G14460 | 0  | 0  | 0  | 0  | 0 | 0  | -1 | 0         | 0                | -1      |
| AT2G14530 | 0  | 0  | 0  | 0  | 0 | 0  | -1 | 0         | 0                | -1      |
| AT2G14560 | 0  | 0  | 0  | 1  | 0 | 0  | 0  | 0         | 1                | 1       |
| AT2G14610 | 0  | 0  | 0  | 1  | 0 | 0  | 0  | 0         | 0                | 1       |
| AT2G14720 | 0  | 0  | 0  | 0  | 0 | 0  | 1  | 0         | 0                | 1       |
| AT2G14740 | 0  | 0  | 0  | 0  | 0 | 0  | 1  | 0         | 0                | 1       |
| AT2G14750 | 0  | 0  | 0  | 0  | 0 | 1  | 0  | 0         | 0                | 1       |
| AT2G14860 | 0  | 0  | 0  | 0  | 0 | -1 | 0  | 0         | 0                | -1      |
| AT2G14880 | 0  | 0  | 0  | 0  | 0 | 0  | -1 | 0         | 0                | -1      |
| AT2G14890 | 1  | 1  | 0  | 0  | 0 | 0  | 0  | 0         | 0                | 1       |
| AT2G14900 | 1  | 1  | 0  | 1  | 0 | 0  | 0  | 0         | 1                | 1       |
| AT2G14960 | 0  | 0  | 0  | 0  | 0 | 0  | 0  | 0         | 1                | 1       |
| AT2G14990 | 0  | 0  | 0  | 0  | 0 | 1  | 0  | 0         | 0                | 1       |
| AT2G15010 | 0  | 0  | 0  | 0  | 0 | -1 | 0  | 0         | 0                | -1      |
| AT2G15090 | 0  | 0  | 0  | 0  | 0 | 0  | -1 | 0         | 0                | -1      |
| AT2G15220 | 0  | 0  | 0  | 0  | 0 | 1  | 0  | 1         | 1                | 1       |
| AT2G15290 | 0  | 0  | 0  | 0  | 0 | 0  | -1 | 0         | 0                | -1      |
| AT2G15310 | 0  | 0  | 0  | 1  | 0 | 0  | 0  | 0         | 0                | 1       |
| AT2G15340 | 0  | 0  | 0  | 0  | 0 | 1  | 0  | 0         | 0                | 1       |
| AT2G15390 | 0  | 0  | 0  | 1  | 0 | 0  | 0  | 0         | 0                | 1       |
| AT2G15480 | 0  | -1 | 0  | 0  | 0 | 0  | 0  | 0         | 0                | -1      |
| AT2G15490 | -1 | -1 | 0  | 0  | 0 | 0  | 0  | 0         | 0                | -1      |
| AT2G15510 | 0  | 0  | 0  | 1  | 0 | 0  | 0  | 0         | 0                | 1       |
| AT2G15580 | 0  | 0  | 0  | 0  | 0 | 0  | -1 | 0         | 0                | -1      |
| AT2G15590 | 0  | 0  | 0  | 0  | 0 | 1  | 0  | 0         | 0                | 1       |
| AT2G15620 | -1 | -1 | 0  | 0  | 0 | 0  | 0  | 0         | 0                | -1      |
| AT2G15830 | 0  | 0  | 0  | 0  | 0 | 1  | 0  | 0         | 0                | 1       |
| AT2G15890 | 0  | 0  | 0  | -1 | 0 | 0  | 0  | 0         | 0                | -1      |
| AT2G16005 | 0  | 0  | 0  | 0  | 0 | -1 | 0  | -1        | 0                | -1      |
| AT2G16040 | 0  | 0  | 0  | 1  | 0 | 0  | 0  | 0         | 0                | 1       |
| AT2G16060 | 0  | 0  | 0  | -1 | 0 | 0  | 0  | 0         | 0                | -1      |
| AT2G16270 | 0  | 0  | 0  | 0  | 0 | 1  | 0  | 0         | 0                | 1       |
| AT2G16280 | 1  | 1  | 0  | 0  | 0 | 0  | 0  | 0         | 0                | 1       |
| AT2G16430 | 0  | 0  | 0  | 0  | 0 | 0  | -1 | 0         | 0                | -1      |
| AT2G16530 | 0  | 0  | 0  | 1  | 0 | 0  | 0  | 0         | 0                | 1       |
| AT2G16630 | 0  | 0  | 0  | 1  | 0 | 1  | 0  | 0         | 0                | 1       |
| AT2G16660 | 0  | 0  | 0  | 0  | 0 | -1 | 0  | 0         | 0                | -1      |
| AT2G16700 | 0  | 0  | -1 | 0  | 0 | 0  | -1 | 0         | 0                | -1      |
| AT2G16800 | 0  | 0  | 0  | 0  | 0 | 0  | -1 | 0         | 0                | -1      |
| AT2G16890 | 0  | 0  | 0  | 0  | 0 | 1  | 0  | 0         | 0                | 1       |
| AT2G16950 | 0  | 0  | 0  | 0  | 0 | 0  | 1  | 0         | 0                | 1       |
| AT2G16960 | 0  | 0  | 0  | 1  | 0 | 0  | 0  | 0         | 0                | 1       |

Appendix Table S1

| Name      | 1 | 2  | 3  | 4  | 5 | 6  | 7  | bes1D_Col | bes1Dpif45_pif45 | ALL_BES |
|-----------|---|----|----|----|---|----|----|-----------|------------------|---------|
| AT2G16970 | 0 | 0  | 0  | 0  | 0 | -1 | 0  | 0         | 0                | -1      |
| AT2G17020 | 0 | 0  | 0  | 0  | 0 | 0  | -1 | 0         | 0                | -1      |
| AT2G17040 | 0 | 0  | 0  | 1  | 1 | 0  | 0  | 1         | 0                | 1       |
| AT2G17070 | 0 | -1 | 0  | 0  | 0 | -1 | 0  | 0         | 0                | -1      |
| AT2G17080 | 0 | 0  | 0  | 0  | 0 | -1 | 0  | 0         | 0                | -1      |
| AT2G17120 | 0 | 0  | 0  | 1  | 0 | 0  | 0  | 0         | 0                | 1       |
| AT2G17240 | 0 | 0  | 0  | 0  | 0 | 0  | -1 | 0         | 0                | -1      |
| AT2G17250 | 0 | 0  | 0  | -1 | 0 | 0  | 0  | 0         | 0                | -1      |
| AT2G17300 | 0 | 1  | 1  | 0  | 0 | 1  | 1  | 0         | 0                | 1       |
| AT2G17330 | 0 | 0  | 0  | 0  | 0 | -1 | 0  | 0         | 0                | -1      |
| AT2G17450 | 0 | 0  | 0  | 0  | 0 | 0  | -1 | 0         | 0                | -1      |
| AT2G17480 | 0 | 0  | 0  | 0  | 0 | 0  | 1  | 0         | 0                | 1       |
| AT2G17500 | 0 | 0  | 0  | 1  | 0 | 1  | 1  | 0         | 0                | 1       |
| AT2G17560 | 0 | 0  | 0  | 0  | 0 | 0  | 1  | 0         | 0                | 1       |
| AT2G17600 | 0 | 0  | 0  | 0  | 0 | 1  | 0  | 0         | 0                | 1       |
| AT2G17680 | 0 | 0  | 0  | 0  | 0 | 0  | 0  | 0         | 1                | 1       |
| AT2G17710 | 0 | 0  | 0  | 0  | 0 | 1  | 0  | 0         | 0                | 1       |
| AT2G17720 | 0 | 0  | 0  | 0  | 0 | 0  | 1  | 0         | 0                | 1       |
| AT2G17740 | 0 | 0  | 0  | 0  | 0 | 0  | 0  | 1         | 1                | 1       |
| AT2G17790 | 0 | 0  | 0  | 0  | 0 | 0  | 1  | 0         | 0                | 1       |
| AT2G17830 | 0 | 0  | 0  | 0  | 0 | 0  | -1 | 0         | 0                | -1      |
| AT2G17840 | 0 | 0  | 0  | 1  | 0 | 1  | 1  | 0         | 0                | 1       |
| AT2G17845 | 0 | 0  | 0  | -1 | 0 | 0  | 0  | 0         | 0                | -1      |
| AT2G17972 | 0 | 0  | 0  | 0  | 0 | 0  | -1 | 0         | 0                | -1      |
| AT2G18010 | 1 | 1  | 0  | 1  | 0 | 1  | 1  | 0         | 1                | 1       |
| AT2G18090 | 0 | 0  | -1 | 0  | 0 | 0  | 0  | 0         | 0                | -1      |
| AT2G18140 | 0 | 0  | 0  | 0  | 0 | 0  | 1  | 0         | 0                | 1       |
| AT2G18150 | 0 | 0  | 0  | 0  | 0 | 1  | 1  | 1         | 1                | 1       |
| AT2G18160 | 0 | 0  | 0  | 0  | 0 | 0  | 1  | 0         | 0                | 1       |
| AT2G18210 | 0 | 0  | 0  | 0  | 0 | 0  | 1  | 0         | 0                | 1       |
| AT2G18390 | 0 | 0  | 0  | 0  | 0 | 0  | -1 | 0         | 0                | -1      |
| AT2G18560 | 0 | 0  | 0  | 0  | 0 | 0  | -1 | 0         | 0                | -1      |
| AT2G18570 | 0 | 0  | 0  | 0  | 0 | 0  | -1 | 0         | 0                | -1      |
| AT2G18670 | 0 | 0  | 0  | 0  | 0 | 0  | 0  | 1         | 1                | 1       |
| AT2G18690 | 0 | 0  | 0  | 1  | 0 | 1  | 0  | 0         | 1                | 1       |
| AT2G18700 | 0 | 0  | 0  | 1  | 0 | 0  | 0  | 0         | 0                | 1       |
| AT2G18710 | 0 | 0  | 0  | 0  | 0 | 0  | -1 | 0         | 0                | -1      |
| AT2G18770 | 0 | 0  | -1 | 0  | 0 | 0  | 0  | 0         | 0                | -1      |
| AT2G18790 | 0 | -1 | -1 | 0  | 0 | 0  | 0  | 0         | 0                | -1      |
| AT2G18900 | 0 | 0  | -1 | 0  | 0 | 0  | 0  | 0         | 0                | -1      |
| AT2G18950 | 0 | 0  | 0  | 0  | 0 | 1  | 0  | 0         | 0                | 1       |
| AT2G18969 | 0 | 0  | 0  | 0  | 0 | 1  | 0  | 0         | 0                | 1       |
| AT2G19120 | 0 | 0  | 0  | 0  | 0 | 0  | 1  | 0         | 0                | 1       |
| AT2G19130 | 0 | 0  | 0  | 1  | 0 | 0  | 0  | 0         | 0                | 1       |
| AT2G19430 | 0 | 0  | -1 | 0  | 0 | 0  | 0  | 0         | 0                | -1      |
| AT2G19480 | 0 | 0  | 0  | 0  | 0 | 0  | 1  | 0         | 0                | 1       |
| AT2G19500 | 0 | 0  | 0  | 0  | 0 | 1  | 0  | 0         | 0                | 1       |
| AT2G19580 | 0 | 0  | 1  | 0  | 0 | 0  | 0  | 0         | 0                | 1       |
| AT2G19620 | 1 | 1  | 1  | 1  | 0 | 0  | 0  | 0         | 0                | 1       |
| AT2G19660 | 0 | 0  | 0  | 0  | 0 | 0  | 1  | 0         | 0                | 1       |
| AT2G19670 | 0 | 0  | -1 | 0  | 0 | 0  | 0  | 0         | 0                | -1      |
| AT2G19760 | 0 | 0  | 0  | 0  | 0 | 0  | 1  | 0         | 0                | 1       |
| AT2G19780 | 1 | 1  | 0  | 0  | 0 | 1  | 0  | 0         | 0                | 1       |
| AT2G19800 | 1 | 1  | 1  | 1  | 1 | 0  | 0  | 0         | 0                | 1       |
| AT2G19803 | 0 | 0  | 0  | 0  | 0 | 1  | 0  | 0         | 1                | 1       |
| AT2G19830 | 0 | 0  | 0  | 0  | 0 | 0  | 1  | 0         | 0                | 1       |
| AT2G19880 | 0 | 1  | 0  | 0  | 0 | 0  | 1  | 0         | 0                | 1       |
| AT2G19940 | 0 | 0  | 0  | 0  | 0 | 0  | -1 | 0         | 0                | -1      |
| AT2G20060 | 0 | 0  | 0  | 0  | 0 | 0  | -1 | 0         | 0                | -1      |
| AT2G20120 | 0 | 0  | 0  | 0  | 0 | 0  | -1 | 0         | 0                | -1      |
| AT2G20130 | 0 | 0  | 0  | 0  | 0 | 0  | -1 | 0         | 0                | -1      |

Appendix Table S1

| Name      | 1  | 2  | 3  | 4 | 5  | 6  | 7  | bes1D_Col | bes1Dpif45_pif45 | ALL_BES |
|-----------|----|----|----|---|----|----|----|-----------|------------------|---------|
| AT2G20142 | 0  | 0  | 0  | 0 | 0  | 1  | 0  | 0         | 0                | 1       |
| AT2G20210 | 0  | 0  | 0  | 0 | 0  | 0  | -1 | 0         | 0                | -1      |
| AT2G20260 | 0  | 0  | 0  | 0 | 0  | 0  | -1 | 0         | 0                | -1      |
| AT2G20450 | 0  | 0  | 0  | 0 | 0  | 0  | -1 | 0         | 0                | -1      |
| AT2G20515 | -1 | 0  | 0  | 0 | 0  | 0  | 0  | 0         | 0                | -1      |
| AT2G20520 | 0  | 0  | 0  | 0 | 0  | -1 | 0  | 0         | 0                | -1      |
| AT2G20562 | 0  | 0  | 0  | 0 | 0  | 0  | 0  | 1         | 1                | 1       |
| AT2G20570 | -1 | -1 | -1 | 0 | 0  | 0  | -1 | 0         | 0                | -1      |
| AT2G20585 | 0  | 0  | 0  | 0 | 0  | 0  | -1 | 0         | 0                | -1      |
| AT2G20590 | 0  | 0  | 0  | 0 | 0  | 1  | 0  | 0         | 0                | 1       |
| AT2G20610 | 0  | 0  | 0  | 0 | 0  | 0  | 1  | 0         | 0                | 1       |
| AT2G20630 | 0  | 0  | 0  | 0 | 0  | 0  | 1  | 0         | 0                | 1       |
| AT2G20650 | 0  | 0  | -1 | 0 | 0  | 0  | 0  | 0         | 0                | -1      |
| AT2G20725 | 0  | 0  | 0  | 0 | 0  | 0  | -1 | 0         | 0                | -1      |
| AT2G20750 | 0  | 0  | 0  | 0 | 0  | 1  | 1  | 0         | 0                | 1       |
| AT2G20760 | 0  | 0  | 0  | 0 | 0  | 0  | 1  | 0         | 0                | 1       |
| AT2G20830 | 0  | 0  | -1 | 0 | 0  | 0  | 0  | 0         | 0                | -1      |
| AT2G20840 | 0  | 0  | 0  | 0 | 0  | 0  | -1 | 0         | 0                | -1      |
| AT2G20860 | 0  | 0  | 0  | 0 | 0  | 0  | -1 | 0         | 0                | -1      |
| AT2G20875 | 0  | 0  | 0  | 0 | 0  | 0  | -1 | 0         | 0                | -1      |
| AT2G20880 | 0  | 0  | 0  | 0 | 0  | 1  | 0  | 0         | 0                | 1       |
| AT2G20890 | 0  | 0  | 0  | 0 | 0  | 0  | -1 | 0         | 0                | -1      |
| AT2G20930 | 0  | 0  | 0  | 0 | 0  | 0  | -1 | 0         | 0                | -1      |
| AT2G20960 | 0  | 0  | 0  | 0 | 0  | 0  | 1  | 0         | 0                | 1       |
| AT2G21080 | 0  | 0  | 0  | 0 | 0  | 0  | -1 | 0         | 0                | -1      |
| AT2G21140 | 0  | 0  | 1  | 1 | 0  | 1  | 1  | 0         | 1                | 1       |
| AT2G21170 | 0  | 0  | 0  | 0 | 0  | 0  | -1 | 0         | 0                | -1      |
| AT2G21185 | 0  | 0  | 0  | 0 | 0  | 0  | -1 | 0         | 0                | -1      |
| AT2G21190 | 0  | 0  | 1  | 0 | 0  | 0  | 0  | 0         | 0                | 1       |
| AT2G21200 | 1  | 1  | 0  | 1 | 0  | 1  | 1  | 0         | 0                | 1       |
| AT2G21220 | 1  | 1  | 0  | 1 | 0  | 0  | 0  | 0         | 0                | 1       |
| AT2G21280 | 0  | 0  | 0  | 0 | 0  | 0  | -1 | 0         | 0                | -1      |
| AT2G21330 | 0  | 0  | 0  | 0 | 0  | 0  | -1 | 0         | 0                | -1      |
| AT2G21385 | 0  | 0  | 0  | 0 | 0  | 0  | -1 | 0         | 0                | -1      |
| AT2G21490 | 0  | 0  | 0  | 0 | 0  | -1 | 0  | 0         | 0                | -1      |
| AT2G21510 | 0  | 0  | 0  | 0 | 0  | -1 | 0  | 0         | 0                | -1      |
| AT2G21540 | 1  | 0  | 0  | 1 | 0  | 0  | 1  | 0         | 0                | 1       |
| AT2G21550 | 0  | 0  | 0  | 0 | 0  | 0  | 1  | 0         | 0                | 1       |
| AT2G21580 | 0  | 0  | 0  | 0 | 0  | 0  | -1 | 0         | 0                | -1      |
| AT2G21590 | 0  | 0  | 0  | 0 | -1 | 0  | 0  | 0         | 0                | -1      |
| AT2G21620 | 0  | 0  | 0  | 0 | 0  | 0  | 1  | 0         | 0                | 1       |
| AT2G21630 | 0  | 0  | 0  | 0 | 0  | 0  | -1 | 0         | 0                | -1      |
| AT2G21780 | 0  | 0  | 0  | 0 | 0  | 1  | 0  | 0         | 0                | 1       |
| AT2G21790 | 0  | 0  | 0  | 0 | 0  | 0  | 1  | 0         | 0                | 1       |
| AT2G21850 | 0  | 0  | 0  | 0 | 0  | 0  | 1  | 0         | 0                | 1       |
| AT2G21860 | 0  | 0  | 0  | 0 | 0  | 0  | -1 | 0         | 0                | -1      |
| AT2G21880 | 0  | 1  | 0  | 0 | 0  | 1  | 1  | 0         | 0                | 1       |
| AT2G21900 | 0  | 0  | 0  | 0 | 0  | 1  | 0  | 1         | 1                | 1       |
| AT2G21940 | 0  | 0  | -1 | 0 | 0  | 0  | 0  | 0         | 0                | -1      |
| AT2G21960 | 0  | 0  | 0  | 0 | 0  | 0  | -1 | 0         | 0                | -1      |
| AT2G22170 | 0  | 0  | 0  | 0 | 0  | 0  | 1  | 0         | 0                | 1       |
| AT2G22200 | 0  | 0  | 0  | 0 | 0  | 1  | 0  | 0         | 0                | 1       |
| AT2G22330 | 0  | 0  | 0  | 0 | 0  | 0  | 0  | 0         | 1                | 1       |
| AT2G22420 | 0  | 0  | 0  | 0 | 0  | 0  | -1 | 0         | 0                | -1      |
| AT2G22450 | 0  | 0  | 0  | 0 | 0  | 0  | -1 | 0         | 0                | -1      |
| AT2G22470 | 0  | 0  | 0  | 0 | 0  | 1  | 1  | 0         | 0                | 1       |
| AT2G22500 | 0  | 0  | 0  | 0 | 0  | 1  | 1  | 0         | 0                | 1       |
| AT2G22510 | 0  | 0  | 0  | 0 | 0  | 1  | 0  | 0         | 0                | 1       |
| AT2G22540 | 0  | 0  | 0  | 0 | 0  | 1  | 0  | 0         | 0                | 1       |
| AT2G22560 | 0  | 0  | 0  | 0 | 0  | 0  | 1  | 0         | 0                | 1       |
| AT2G22620 | 0  | 0  | 0  | 1 | 0  | 0  | 0  | 0         | 0                | 1       |

Appendix Table S1

| Name      | 1  | 2  | 3  | 4  | 5 | 6  | 7  | bes1D_Col | bes1Dpif45_pif45 | ALL_BES |
|-----------|----|----|----|----|---|----|----|-----------|------------------|---------|
| AT2G22650 | 0  | 0  | 0  | 0  | 0 | 0  | -1 | 0         | 0                | -1      |
| AT2G22750 | 0  | 0  | 0  | 0  | 0 | -1 | 0  | 0         | 0                | -1      |
| AT2G22810 | 0  | 1  | 0  | 0  | 0 | 0  | 0  | 0         | 1                | 1       |
| AT2G22830 | 0  | 1  | 0  | 0  | 0 | 0  | 0  | 0         | 0                | 1       |
| AT2G22930 | 0  | 0  | 0  | 0  | 0 | 1  | 1  | 0         | 1                | 1       |
| AT2G22970 | 0  | 0  | 0  | 0  | 0 | 0  | 1  | 0         | 0                | 1       |
| AT2G22990 | 0  | 0  | 0  | -1 | 0 | 0  | 0  | 0         | 0                | -1      |
| AT2G23050 | 0  | -1 | 0  | 0  | 0 | -1 | 0  | 0         | 0                | -1      |
| AT2G23170 | 0  | 0  | 0  | 1  | 0 | 0  | 0  | 0         | 1                | 1       |
| AT2G23180 | 0  | 0  | 0  | -1 | 0 | 0  | -1 | -1        | 0                | -1      |
| AT2G23260 | 0  | 0  | 0  | 0  | 0 | 0  | 0  | 0         | 1                | 1       |
| AT2G23270 | 0  | 0  | 0  | 0  | 0 | 0  | 0  | 1         | 0                | 1       |
| AT2G23290 | 0  | 0  | 0  | 1  | 0 | 0  | 0  | 0         | 0                | 1       |
| AT2G23330 | 0  | 0  | 0  | 0  | 0 | 0  | -1 | 0         | 0                | -1      |
| AT2G23360 | 0  | 0  | -1 | 0  | 0 | 0  | 0  | 0         | 0                | -1      |
| AT2G23400 | 0  | 0  | 0  | 0  | 0 | -1 | 0  | 0         | 0                | -1      |
| AT2G23410 | 0  | 0  | 0  | 0  | 0 | -1 | 0  | 0         | 0                | -1      |
| AT2G23500 | 0  | 0  | 0  | 1  | 0 | 0  | 0  | 0         | 0                | 1       |
| AT2G23540 | 0  | 0  | 0  | 0  | 0 | 1  | 0  | 0         | 1                | 1       |
| AT2G23560 | 0  | 0  | 0  | 1  | 0 | 0  | 0  | 0         | 0                | 1       |
| AT2G23630 | 0  | 0  | 0  | 0  | 0 | -1 | 0  | 0         | 0                | -1      |
| AT2G23640 | 0  | 0  | 0  | 0  | 0 | -1 | 0  | 0         | 0                | -1      |
| AT2G23670 | 0  | 0  | 0  | 0  | 0 | 0  | -1 | -1        | 0                | -1      |
| AT2G23810 | 0  | 0  | 0  | 0  | 0 | 0  | 1  | 0         | 0                | 1       |
| AT2G23830 | 0  | 0  | 0  | 0  | 0 | 0  | 0  | 0         | 1                | 1       |
| AT2G24090 | 0  | 0  | 0  | 0  | 0 | 0  | -1 | 0         | 0                | -1      |
| AT2G24300 | 1  | 1  | 0  | 0  | 0 | 0  | 1  | 0         | 0                | 1       |
| AT2G24330 | 0  | 0  | 0  | 0  | 0 | 0  | 1  | 0         | 0                | 1       |
| AT2G24550 | 0  | 0  | 0  | 0  | 0 | 0  | 1  | 0         | 0                | 1       |
| AT2G24570 | 0  | 0  | -1 | 0  | 0 | 0  | 0  | 0         | 0                | -1      |
| AT2G24580 | 0  | 0  | -1 | 0  | 0 | 0  | 0  | 0         | 0                | -1      |
| AT2G24610 | 0  | 0  | 0  | 0  | 0 | -1 | 0  | 0         | 0                | -1      |
| AT2G24720 | 0  | 0  | 0  | 0  | 0 | 0  | 0  | 1         | 1                | 1       |
| AT2G24790 | 0  | 0  | 0  | 0  | 0 | 0  | -1 | 0         | 0                | -1      |
| AT2G24800 | 0  | 0  | 0  | 0  | 0 | 1  | 0  | 0         | 0                | 1       |
| AT2G24820 | 0  | 0  | 0  | 0  | 0 | 0  | -1 | 0         | 0                | -1      |
| AT2G24830 | 0  | 0  | 0  | 0  | 0 | 0  | -1 | 0         | 0                | -1      |
| AT2G24850 | 0  | 0  | 0  | 1  | 0 | 0  | 0  | 0         | 0                | 1       |
| AT2G24860 | 0  | 0  | 0  | 1  | 0 | 0  | 0  | 0         | 0                | 1       |
| AT2G24980 | 0  | 0  | 0  | 0  | 0 | -1 | 0  | 0         | 0                | -1      |
| AT2G25000 | 0  | 0  | 0  | 1  | 0 | 1  | 0  | 0         | 1                | 1       |
| AT2G25090 | 0  | 0  | 0  | 0  | 0 | 1  | 0  | 0         | 0                | 1       |
| AT2G25150 | 0  | 0  | 0  | 0  | 0 | -1 | 0  | -1        | -1               | -1      |
| AT2G25190 | 0  | 0  | 0  | 1  | 0 | 0  | 0  | 0         | 0                | 1       |
| AT2G25200 | 1  | 0  | 0  | 0  | 0 | 1  | 0  | 0         | 0                | 1       |
| AT2G25210 | 0  | 0  | 0  | 0  | 0 | 0  | -1 | 0         | 0                | -1      |
| AT2G25220 | 0  | 0  | 0  | 0  | 0 | 0  | 1  | 0         | 0                | 1       |
| AT2G25300 | 0  | 0  | 0  | 1  | 0 | 0  | 0  | 0         | 0                | 1       |
| AT2G25310 | 0  | 0  | -1 | 0  | 0 | 0  | 0  | 0         | 0                | -1      |
| AT2G25355 | 0  | 0  | -1 | 0  | 0 | 0  | 0  | 0         | 0                | -1      |
| AT2G25420 | 0  | 0  | 0  | 0  | 0 | 0  | -1 | 0         | 0                | -1      |
| AT2G25440 | 0  | 0  | 0  | 0  | 0 | 0  | 0  | 0         | 1                | 1       |
| AT2G25510 | 0  | 0  | 0  | 0  | 0 | 0  | 0  | 1         | 1                | 1       |
| AT2G25625 | 0  | 0  | 0  | 0  | 0 | 1  | 0  | 0         | 0                | 1       |
| AT2G25735 | 0  | 0  | 0  | 0  | 0 | 1  | 0  | 0         | 0                | 1       |
| AT2G25760 | 0  | 0  | 0  | 0  | 0 | 0  | 1  | 0         | 0                | 1       |
| AT2G25840 | 0  | 0  | 0  | 0  | 0 | 0  | -1 | 0         | 0                | -1      |
| AT2G25900 | 0  | 0  | 0  | 0  | 0 | 0  | -1 | 0         | 0                | -1      |
| AT2G25910 | 0  | 0  | 0  | 0  | 0 | 0  | -1 | 0         | 0                | -1      |
| AT2G25970 | 0  | 0  | -1 | 0  | 0 | 0  | 0  | 0         | 0                | -1      |
| AT2G25980 | -1 | -1 | 0  | -1 | 0 | -1 | 0  | 0         | 0                | -1      |



Appendix Table S1

| Name      | 1  | 2  | 3  | 4  | 5 | 6  | 7  | bes1D_Col | bes1Dpif45_pif45 | ALL_BES |
|-----------|----|----|----|----|---|----|----|-----------|------------------|---------|
| AT2G26070 | 0  | 0  | 0  | 0  | 0 | 0  | -1 | 0         | 0                | -1      |
| AT2G26250 | 0  | 0  | 0  | 0  | 0 | 0  | 1  | 0         | 0                | 1       |
| AT2G26340 | 0  | 0  | 0  | 0  | 0 | 0  | -1 | 0         | 0                | -1      |
| AT2G26390 | 0  | 0  | 0  | 0  | 0 | 1  | 1  | 0         | 0                | 1       |
| AT2G26400 | 0  | 0  | 0  | 0  | 0 | 0  | 0  | 0         | 1                | 1       |
| AT2G26480 | 0  | 0  | 0  | 0  | 0 | 1  | 0  | 0         | 0                | 1       |
| AT2G26500 | 0  | 0  | 0  | 0  | 0 | 0  | -1 | 0         | 0                | -1      |
| AT2G26530 | 0  | 0  | 0  | 0  | 0 | 1  | 0  | 1         | 0                | 1       |
| AT2G26540 | 0  | 0  | 0  | 0  | 0 | 0  | -1 | 0         | 0                | -1      |
| AT2G26560 | 0  | 0  | 0  | 0  | 0 | 0  | 0  | 1         | 1                | 1       |
| AT2G26580 | 0  | 0  | 1  | 0  | 0 | 0  | 0  | 0         | 0                | 1       |
| AT2G26670 | 0  | 0  | 0  | 0  | 0 | 0  | 1  | 0         | 0                | 1       |
| AT2G26695 | 0  | 0  | 0  | 0  | 0 | 1  | 0  | 0         | 0                | 1       |
| AT2G26710 | 1  | 1  | 1  | 1  | 1 | 0  | 1  | 0         | 0                | 1       |
| AT2G26740 | -1 | -1 | 0  | -1 | 0 | 0  | -1 | 0         | 0                | -1      |
| AT2G26750 | 0  | 0  | 0  | 0  | 0 | 0  | -1 | 0         | 0                | -1      |
| AT2G26760 | 0  | 0  | 0  | 0  | 0 | 1  | 1  | 0         | 0                | 1       |
| AT2G26870 | 0  | -1 | -1 | 0  | 0 | 0  | 0  | 0         | 0                | -1      |
| AT2G26930 | 0  | 0  | 0  | 0  | 0 | 0  | -1 | 0         | 0                | -1      |
| AT2G27020 | 0  | 0  | 0  | 0  | 0 | 0  | 1  | 0         | 0                | 1       |
| AT2G27040 | 0  | 0  | -1 | 0  | 0 | 0  | 0  | 0         | 0                | -1      |
| AT2G27080 | 0  | 0  | 0  | 0  | 0 | 1  | 0  | 0         | 0                | 1       |
| AT2G27140 | 0  | 0  | 0  | 0  | 0 | 0  | 0  | 0         | 1                | 1       |
| AT2G27190 | 0  | 0  | 0  | 0  | 0 | 0  | 1  | 0         | 0                | 1       |
| AT2G27290 | 0  | 0  | 0  | 0  | 0 | 0  | -1 | 0         | 0                | -1      |
| AT2G27360 | 0  | 0  | 0  | 0  | 0 | 0  | 1  | 0         | 0                | 1       |
| AT2G27370 | 0  | 0  | 0  | 0  | 0 | 1  | 1  | 0         | 0                | 1       |
| AT2G27380 | 0  | 0  | 0  | 0  | 0 | -1 | 0  | 0         | 0                | -1      |
| AT2G27389 | 0  | 0  | 0  | 0  | 0 | 0  | 0  | 1         | 0                | 1       |
| AT2G27550 | 0  | 0  | 0  | 0  | 0 | -1 | -1 | 0         | 0                | -1      |
| AT2G27680 | 0  | 0  | 0  | 0  | 0 | 0  | -1 | 0         | 0                | -1      |
| AT2G27690 | 1  | 1  | 0  | 1  | 1 | 0  | 0  | 0         | 0                | 1       |
| AT2G27720 | 0  | 0  | 0  | 0  | 0 | 0  | -1 | 0         | 0                | -1      |
| AT2G27740 | 0  | 0  | 0  | 0  | 0 | 1  | 0  | 0         | 0                | 1       |
| AT2G27920 | 0  | 0  | 0  | 1  | 0 | 0  | 1  | 0         | 1                | 1       |
| AT2G27930 | 0  | 0  | 0  | 0  | 0 | 1  | 0  | 0         | 0                | 1       |
| AT2G27970 | 0  | 0  | 0  | 0  | 0 | 1  | 0  | 0         | 0                | 1       |
| AT2G28000 | 0  | 0  | 0  | 0  | 0 | 0  | -1 | 0         | 0                | -1      |
| AT2G28070 | 0  | 0  | 0  | 0  | 0 | 0  | -1 | 0         | 0                | -1      |
| AT2G28085 | 0  | 0  | 0  | 0  | 0 | 0  | 0  | 0         | 1                | 1       |
| AT2G28100 | 0  | 0  | 0  | 0  | 0 | 0  | 1  | 0         | 0                | 1       |
| AT2G28110 | 0  | 0  | 1  | 0  | 0 | 1  | 0  | 0         | 0                | 1       |
| AT2G28120 | 0  | 0  | 0  | 0  | 0 | 0  | -1 | 0         | 0                | -1      |
| AT2G28140 | 0  | 0  | 0  | 0  | 0 | -1 | 0  | 0         | 0                | -1      |
| AT2G28210 | 0  | 0  | 0  | 0  | 0 | 0  | 0  | 1         | 0                | 1       |
| AT2G28315 | 0  | 0  | 0  | 0  | 0 | 1  | 0  | 0         | 0                | 1       |
| AT2G28400 | 0  | 0  | 0  | 1  | 0 | 0  | 0  | 0         | 0                | 1       |
| AT2G28490 | 0  | 0  | 0  | 0  | 0 | -1 | 0  | 0         | 0                | -1      |
| AT2G28560 | 0  | 0  | 0  | 0  | 0 | 1  | 0  | 0         | 0                | 1       |
| AT2G28570 | 0  | 0  | 0  | 1  | 0 | 1  | 0  | 0         | 0                | 1       |
| AT2G28605 | 0  | 0  | 0  | 0  | 0 | 0  | -1 | 0         | 0                | -1      |
| AT2G28620 | 0  | 0  | 0  | 0  | 0 | 1  | 0  | 0         | 0                | 1       |
| AT2G28630 | 0  | 0  | 0  | 1  | 0 | 1  | 1  | 0         | 0                | 1       |
| AT2G28670 | 0  | 0  | 0  | 0  | 0 | 0  | 1  | 0         | 0                | 1       |
| AT2G28760 | 0  | 0  | 0  | 0  | 0 | 1  | 0  | 0         | 0                | 1       |
| AT2G28780 | 0  | 0  | 0  | 0  | 0 | 1  | 0  | 0         | 0                | 1       |
| AT2G28850 | 0  | 0  | 0  | 0  | 0 | -1 | 0  | 0         | 0                | -1      |
| AT2G28860 | 0  | 0  | 0  | 0  | 0 | -1 | 0  | 0         | 0                | -1      |
| AT2G28890 | 0  | 0  | 0  | 0  | 0 | 0  | 1  | 0         | 0                | 1       |
| AT2G28900 | 0  | 0  | 0  | 0  | 0 | 0  | -1 | 0         | 0                | -1      |
| AT2G28930 | 0  | 0  | 0  | 0  | 0 | 0  | -1 | 0         | 0                | -1      |

Appendix Table S1

| Name      | 1  | 2  | 3  | 4  | 5  | 6  | 7  | bes1D_Col | bes1Dpif45_pif45 | ALL_BES |
|-----------|----|----|----|----|----|----|----|-----------|------------------|---------|
| AT2G28960 | 0  | 0  | 0  | 1  | 0  | 0  | 0  | 0         | 0                | 1       |
| AT2G29090 | 0  | 0  | 0  | 0  | -1 | 0  | 0  | 0         | 0                | -1      |
| AT2G29100 | 0  | 0  | 0  | 0  | 0  | 1  | 0  | 1         | 0                | 1       |
| AT2G29110 | 0  | 0  | 0  | 0  | 0  | 1  | 0  | 0         | 0                | 1       |
| AT2G29120 | 0  | 0  | 0  | 1  | 0  | 0  | 0  | 0         | 0                | 1       |
| AT2G29130 | 0  | 0  | 0  | 0  | 0  | 1  | 0  | 0         | 0                | 1       |
| AT2G29180 | 0  | 0  | 0  | 0  | 0  | 0  | -1 | 0         | 0                | -1      |
| AT2G29220 | 0  | 0  | 0  | 0  | 0  | 0  | 0  | 1         | 1                | 1       |
| AT2G29230 | 0  | 0  | 0  | 0  | 0  | 1  | 0  | 0         | 0                | 1       |
| AT2G29250 | 0  | 0  | 0  | 0  | 0  | 0  | 0  | 1         | 1                | 1       |
| AT2G29290 | 0  | 0  | 0  | 0  | 0  | 0  | -1 | 0         | 0                | -1      |
| AT2G29310 | 0  | 0  | 0  | 0  | 0  | -1 | -1 | 0         | 0                | -1      |
| AT2G29330 | 0  | 0  | 0  | 1  | 0  | 0  | 0  | 0         | 0                | 1       |
| AT2G29340 | 0  | 0  | 0  | 0  | 0  | 0  | -1 | 0         | 0                | -1      |
| AT2G29360 | 0  | 0  | 0  | 0  | 0  | -1 | 0  | 0         | 0                | -1      |
| AT2G29390 | -1 | -1 | -1 | -1 | 0  | 0  | -1 | 0         | 0                | -1      |
| AT2G29440 | 0  | 0  | 0  | 0  | 0  | 0  | 1  | 0         | 0                | 1       |
| AT2G29450 | 0  | 0  | 0  | 0  | 0  | 0  | 1  | 0         | 0                | 1       |
| AT2G29460 | 0  | 0  | 0  | 0  | 0  | 0  | 0  | 0         | 1                | 1       |
| AT2G29490 | 0  | -1 | 0  | 0  | 0  | 0  | 0  | 0         | 0                | -1      |
| AT2G29550 | 0  | 0  | 0  | 0  | 0  | 0  | 1  | 0         | 0                | 1       |
| AT2G29620 | 0  | 0  | 0  | 0  | 0  | -1 | 0  | -1        | -1               | -1      |
| AT2G29650 | 0  | 0  | 0  | 0  | 0  | 0  | -1 | 0         | 0                | -1      |
| AT2G29670 | 0  | 0  | 0  | 0  | 0  | 0  | -1 | 0         | 0                | -1      |
| AT2G29740 | 0  | 0  | 0  | 0  | 0  | 1  | 0  | 0         | 0                | 1       |
| AT2G29860 | 0  | 0  | 0  | 1  | 0  | 0  | 0  | 0         | 0                | 1       |
| AT2G29920 | 0  | 0  | 1  | 0  | 0  | 0  | 0  | 0         | 0                | 1       |
| AT2G29960 | 0  | 0  | 0  | 0  | 0  | 0  | 1  | 0         | 0                | 1       |
| AT2G29980 | -1 | -1 | 0  | 0  | 0  | 0  | -1 | 0         | 0                | -1      |
| AT2G30010 | 0  | 1  | 1  | 1  | 0  | 0  | 1  | 0         | 0                | 1       |
| AT2G30040 | 0  | 0  | 0  | 1  | 0  | 0  | 1  | 0         | 0                | 1       |
| AT2G30060 | 0  | 0  | 0  | 0  | 0  | 0  | 1  | 0         | 0                | 1       |
| AT2G30070 | -1 | -1 | -1 | -1 | -1 | -1 | -1 | 0         | 0                | -1      |
| AT2G30130 | 0  | 0  | 0  | 0  | 0  | -1 | 0  | 0         | 0                | -1      |
| AT2G30160 | 0  | 0  | 0  | 0  | 0  | 0  | -1 | 0         | 0                | -1      |
| AT2G30170 | 0  | 0  | 0  | 0  | 0  | 0  | -1 | 0         | 0                | -1      |
| AT2G30210 | 0  | 0  | 0  | 0  | 0  | 1  | 1  | 0         | 0                | 1       |
| AT2G30250 | 0  | 0  | 0  | 1  | 0  | 0  | 0  | 0         | 0                | 1       |
| AT2G30310 | 0  | 0  | 0  | 1  | 0  | 0  | 0  | 0         | 0                | 1       |
| AT2G30360 | 0  | 0  | 0  | 0  | 0  | 0  | 1  | 0         | 0                | 1       |
| AT2G30390 | -1 | -1 | -1 | 0  | 0  | 0  | 0  | -1        | 0                | -1      |
| AT2G30395 | 0  | 0  | 0  | 0  | 0  | 1  | 0  | 0         | 0                | 1       |
| AT2G30490 | 0  | 0  | 0  | 0  | 0  | 0  | 1  | 0         | 0                | 1       |
| AT2G30540 | 0  | 0  | 0  | 0  | 0  | -1 | 0  | 0         | 0                | -1      |
| AT2G30550 | 0  | 0  | 0  | 1  | 0  | 0  | 0  | 0         | 0                | 1       |
| AT2G30570 | 0  | 0  | 0  | 0  | 0  | 0  | -1 | 0         | 0                | -1      |
| AT2G30590 | 0  | 0  | -1 | 0  | 0  | 0  | 0  | 0         | 0                | -1      |
| AT2G30670 | 0  | 0  | 0  | 1  | 0  | 0  | 0  | 0         | 0                | 1       |
| AT2G30750 | 0  | 0  | 0  | 0  | 0  | 0  | 0  | 1         | 1                | 1       |
| AT2G30770 | 0  | 0  | 0  | 0  | 0  | 0  | 0  | 0         | 1                | 1       |
| AT2G30810 | 0  | 0  | 0  | 1  | 0  | 0  | 0  | 0         | 0                | 1       |
| AT2G30870 | 0  | 0  | 0  | 0  | 0  | 0  | 1  | 0         | 0                | 1       |
| AT2G30930 | 1  | 1  | 0  | 0  | 0  | 1  | 1  | 0         | 0                | 1       |
| AT2G31070 | 0  | 0  | 0  | 0  | 0  | 0  | -1 | 0         | 0                | -1      |
| AT2G31110 | 0  | 0  | 0  | 0  | 0  | 1  | 1  | 0         | 0                | 1       |
| AT2G31230 | 0  | 0  | 0  | 0  | 0  | -1 | 0  | 0         | 0                | -1      |
| AT2G31380 | 0  | 0  | 0  | 0  | 0  | 0  | 0  | -1        | 0                | -1      |
| AT2G31390 | 0  | 0  | 0  | 0  | 0  | 0  | 1  | 0         | 0                | 1       |
| AT2G31540 | 0  | 0  | 0  | 0  | 0  | -1 | 0  | 0         | 0                | -1      |
| AT2G31570 | 0  | 0  | 0  | 0  | 0  | 0  | 1  | 0         | 0                | 1       |
| AT2G31670 | 0  | 0  | 0  | 0  | 0  | 0  | -1 | 0         | 0                | -1      |

Appendix Table S1

| Name      | 1  | 2  | 3  | 4 | 5 | 6  | 7  | bes1D_Col | bes1Dpif45_pif45 | ALL_BES |
|-----------|----|----|----|---|---|----|----|-----------|------------------|---------|
| AT2G31730 | 1  | 1  | 1  | 1 | 1 | 1  | 0  | 0         | 0                | 1       |
| AT2G31750 | 0  | 0  | 0  | 0 | 0 | 0  | -1 | 0         | 0                | -1      |
| AT2G31840 | 0  | 0  | 0  | 0 | 0 | 0  | -1 | 0         | 0                | -1      |
| AT2G31865 | 0  | 0  | 0  | 0 | 0 | 0  | 0  | 1         | 0                | 1       |
| AT2G31880 | 0  | 0  | 0  | 1 | 0 | 0  | 0  | 0         | 0                | 1       |
| AT2G31940 | 0  | 0  | 0  | 0 | 0 | 1  | 0  | 0         | 0                | 1       |
| AT2G31945 | 0  | 0  | 0  | 0 | 0 | 1  | 0  | 0         | 0                | 1       |
| AT2G32010 | -1 | 0  | 0  | 0 | 0 | 0  | 0  | 0         | 0                | -1      |
| AT2G32020 | 0  | 0  | 0  | 0 | 0 | 0  | 0  | 0         | 1                | 1       |
| AT2G32090 | 0  | 0  | 0  | 0 | 0 | 0  | -1 | 0         | 0                | -1      |
| AT2G32100 | 1  | 1  | 0  | 0 | 0 | 0  | 0  | 0         | 0                | 1       |
| AT2G32140 | 0  | 0  | 0  | 0 | 0 | 1  | 0  | 0         | 0                | 1       |
| AT2G32150 | 0  | 0  | 0  | 1 | 0 | 0  | 1  | 0         | 0                | 1       |
| AT2G32190 | 0  | 0  | 0  | 0 | 0 | 1  | 0  | 0         | 0                | 1       |
| AT2G32210 | 0  | 0  | 0  | 1 | 0 | 0  | 0  | 0         | 0                | 1       |
| AT2G32300 | 0  | 0  | 0  | 0 | 0 | 1  | 1  | 0         | 0                | 1       |
| AT2G32430 | 0  | 0  | 0  | 0 | 0 | 0  | 1  | 0         | 0                | 1       |
| AT2G32440 | 0  | 0  | 0  | 0 | 0 | 0  | -1 | 0         | 0                | -1      |
| AT2G32450 | 0  | 0  | 0  | 1 | 0 | 0  | 0  | 0         | 0                | 1       |
| AT2G32520 | 0  | 0  | 0  | 0 | 0 | 0  | -1 | 0         | 0                | -1      |
| AT2G32530 | 0  | 0  | 0  | 0 | 0 | 0  | -1 | 0         | 0                | -1      |
| AT2G32560 | 1  | 0  | 0  | 1 | 0 | 0  | 1  | 0         | 0                | 1       |
| AT2G32580 | 0  | 0  | 0  | 0 | 0 | 0  | 1  | 0         | 0                | 1       |
| AT2G32590 | 0  | 0  | 0  | 0 | 0 | 1  | 0  | 0         | 0                | 1       |
| AT2G32650 | 0  | 0  | 0  | 0 | 0 | 0  | -1 | 0         | 0                | -1      |
| AT2G32680 | 0  | 0  | 0  | 1 | 0 | 0  | 0  | 0         | 0                | 1       |
| AT2G32800 | 0  | 0  | 0  | 1 | 0 | 1  | 1  | 0         | 0                | 1       |
| AT2G32810 | 0  | 0  | 0  | 0 | 0 | 0  | 1  | 0         | 0                | 1       |
| AT2G32860 | 0  | 0  | 0  | 0 | 0 | -1 | 0  | 0         | 0                | -1      |
| AT2G32960 | 0  | 0  | 0  | 0 | 0 | 1  | 0  | 0         | 0                | 1       |
| AT2G32990 | 0  | 0  | 0  | 0 | 0 | -1 | 0  | 0         | -1               | -1      |
| AT2G33050 | 0  | 0  | -1 | 0 | 0 | 0  | 0  | 0         | 0                | -1      |
| AT2G33130 | 0  | 0  | 0  | 0 | 0 | 0  | 0  | 0         | 1                | 1       |
| AT2G33160 | 0  | 0  | 0  | 0 | 0 | -1 | 0  | 0         | 0                | -1      |
| AT2G33180 | 0  | 0  | 0  | 0 | 0 | 0  | -1 | 0         | 0                | -1      |
| AT2G33210 | 0  | 0  | 0  | 0 | 0 | 0  | 1  | 0         | 0                | 1       |
| AT2G33370 | 0  | 0  | 0  | 0 | 0 | 0  | -1 | 0         | 0                | -1      |
| AT2G33380 | 0  | 0  | 0  | 0 | 0 | 1  | 1  | 0         | 0                | 1       |
| AT2G33430 | 0  | 0  | 0  | 0 | 0 | 0  | -1 | 0         | 0                | -1      |
| AT2G33460 | 0  | 0  | 1  | 0 | 0 | 0  | 0  | 0         | 0                | 1       |
| AT2G33540 | 0  | 0  | 0  | 0 | 0 | 0  | 1  | 0         | 0                | 1       |
| AT2G33560 | 0  | 0  | 0  | 0 | 0 | 1  | 0  | 0         | 0                | 1       |
| AT2G33570 | 1  | 1  | 1  | 0 | 0 | 0  | 1  | 0         | 0                | 1       |
| AT2G33580 | 0  | 0  | 0  | 1 | 0 | 0  | 0  | 0         | 0                | 1       |
| AT2G33590 | 0  | 0  | 0  | 0 | 0 | 0  | 1  | 0         | 0                | 1       |
| AT2G33710 | -1 | -1 | 0  | 0 | 0 | 0  | 0  | 0         | 0                | -1      |
| AT2G33735 | 0  | 0  | 0  | 0 | 0 | 0  | -1 | 0         | 0                | -1      |
| AT2G33790 | 0  | -1 | 0  | 0 | 0 | -1 | 0  | -1        | -1               | -1      |
| AT2G33800 | 0  | 0  | 0  | 0 | 0 | 0  | -1 | 0         | 0                | -1      |
| AT2G33820 | 0  | 0  | 0  | 0 | 0 | 0  | -1 | 0         | 0                | -1      |
| AT2G33830 | 0  | 0  | 0  | 1 | 0 | 0  | 0  | 0         | 0                | 1       |
| AT2G33860 | 0  | 0  | 0  | 0 | 0 | 0  | -1 | 0         | 0                | -1      |
| AT2G33990 | 0  | 0  | 0  | 0 | 0 | 0  | 1  | 0         | 0                | 1       |
| AT2G34020 | 0  | -1 | 0  | 0 | 0 | 0  | 0  | 0         | 0                | -1      |
| AT2G34080 | 0  | 0  | 0  | 1 | 0 | 0  | 0  | 0         | 0                | 1       |
| AT2G34180 | 0  | 1  | 0  | 0 | 0 | 1  | 0  | 0         | 0                | 1       |
| AT2G34300 | 1  | 1  | 1  | 0 | 0 | 0  | 0  | 0         | 0                | 1       |
| AT2G34410 | 0  | 0  | 0  | 0 | 0 | 0  | -1 | 0         | 0                | -1      |
| AT2G34420 | 0  | 0  | 0  | 0 | 0 | 0  | -1 | 0         | 0                | -1      |
| AT2G34500 | 0  | 0  | 0  | 0 | 0 | 1  | 1  | 0         | 0                | 1       |
| AT2G34590 | 0  | 0  | 0  | 0 | 0 | 0  | -1 | 0         | 0                | -1      |

Appendix Table S1

| Name      | 1  | 2  | 3  | 4  | 5 | 6  | 7  | bes1D_Col | bes1Dpif45_pif45 | ALL_BES |
|-----------|----|----|----|----|---|----|----|-----------|------------------|---------|
| AT2G34600 | 0  | 0  | 0  | 0  | 0 | 1  | 0  | 0         | 0                | 1       |
| AT2G34620 | 0  | 0  | -1 | 0  | 0 | 0  | 0  | 0         | 0                | -1      |
| AT2G34640 | 0  | 0  | 0  | -1 | 0 | 0  | 0  | 0         | 0                | -1      |
| AT2G34655 | 0  | 0  | 0  | 0  | 0 | 1  | 0  | 1         | 1                | 1       |
| AT2G34700 | 0  | 0  | 0  | 0  | 0 | 0  | 1  | 0         | 0                | 1       |
| AT2G34910 | 0  | 0  | 0  | 0  | 0 | -1 | 0  | 0         | 0                | -1      |
| AT2G34920 | 0  | 0  | 0  | 0  | 0 | 0  | 1  | 0         | 0                | 1       |
| AT2G34930 | 1  | 1  | 0  | 1  | 1 | 0  | 1  | 0         | 1                | 1       |
| AT2G35070 | 0  | 0  | 0  | 0  | 0 | 0  | 0  | -1        | -1               | -1      |
| AT2G35260 | 0  | 0  | 0  | 0  | 0 | 0  | -1 | 0         | 0                | -1      |
| AT2G35290 | 0  | 1  | 0  | 0  | 0 | 0  | 0  | 0         | 0                | 1       |
| AT2G35300 | 0  | 0  | 0  | 0  | 0 | 0  | 0  | -1        | 0                | -1      |
| AT2G35320 | 0  | 0  | -1 | 0  | 0 | 0  | 0  | 0         | 0                | -1      |
| AT2G35380 | 0  | 0  | 0  | 0  | 0 | 0  | 0  | 1         | 1                | 1       |
| AT2G35410 | 0  | 0  | 0  | 0  | 0 | 0  | -1 | 0         | 0                | -1      |
| AT2G35450 | 0  | 0  | 0  | 0  | 0 | 0  | -1 | 0         | 0                | -1      |
| AT2G35490 | 0  | 0  | 0  | 0  | 0 | 0  | -1 | 0         | 0                | -1      |
| AT2G35500 | 0  | 0  | 0  | 0  | 0 | 0  | -1 | 0         | 0                | -1      |
| AT2G35585 | 0  | 0  | 0  | 0  | 0 | 0  | 1  | 0         | 0                | 1       |
| AT2G35600 | 0  | 0  | 0  | 0  | 0 | 1  | 0  | 0         | 0                | 1       |
| AT2G35710 | 0  | 1  | 0  | 0  | 0 | 1  | 1  | 0         | 1                | 1       |
| AT2G35730 | 0  | 0  | 0  | 0  | 0 | 0  | 0  | 0         | 1                | 1       |
| AT2G35750 | 0  | 0  | 0  | 0  | 0 | 0  | -1 | 0         | 0                | -1      |
| AT2G35760 | 0  | 1  | 0  | 0  | 0 | 0  | 0  | 0         | 0                | 1       |
| AT2G35860 | 1  | 1  | 0  | 0  | 0 | 0  | 1  | 0         | 0                | 1       |
| AT2G35880 | 1  | 1  | 0  | 0  | 0 | 0  | 1  | 0         | 0                | 1       |
| AT2G35930 | 0  | 0  | 0  | 0  | 0 | 0  | 0  | 1         | 1                | 1       |
| AT2G35940 | 0  | -1 | -1 | 0  | 0 | 0  | 0  | 0         | 0                | -1      |
| AT2G35980 | 0  | 0  | 0  | 0  | 0 | -1 | 0  | 0         | 0                | -1      |
| AT2G36000 | 0  | 0  | 0  | 0  | 0 | 0  | -1 | 0         | 0                | -1      |
| AT2G36050 | 0  | -1 | 0  | 0  | 0 | 0  | 0  | 0         | 0                | -1      |
| AT2G36100 | 0  | 0  | 0  | 0  | 0 | 1  | 1  | 0         | 0                | 1       |
| AT2G36130 | 0  | 0  | 0  | 0  | 0 | 0  | -1 | 0         | 0                | -1      |
| AT2G36170 | 0  | 0  | 0  | 0  | 0 | 0  | -1 | 0         | 0                | -1      |
| AT2G36200 | 0  | 0  | 0  | 0  | 0 | 1  | 0  | 0         | 0                | 1       |
| AT2G36220 | 1  | 1  | 1  | 1  | 0 | 1  | 1  | 0         | 0                | 1       |
| AT2G36310 | 0  | 0  | 0  | 0  | 0 | 1  | 1  | 0         | 0                | 1       |
| AT2G36325 | 0  | 0  | 0  | 0  | 0 | 0  | 0  | 1         | 0                | 1       |
| AT2G36350 | 0  | 0  | 0  | 0  | 0 | 0  | -1 | 0         | 0                | -1      |
| AT2G36355 | 0  | 0  | 0  | 0  | 0 | 1  | 0  | 0         | 0                | 1       |
| AT2G36380 | 0  | 0  | 0  | 0  | 0 | 0  | 1  | 0         | 0                | 1       |
| AT2G36390 | 0  | 0  | 0  | 0  | 0 | 0  | -1 | 0         | 0                | -1      |
| AT2G36400 | 0  | 0  | 0  | 0  | 0 | 0  | -1 | 0         | 0                | -1      |
| AT2G36410 | 0  | 0  | 0  | 0  | 0 | 1  | 1  | 0         | 0                | 1       |
| AT2G36500 | 0  | 0  | 0  | 0  | 0 | 1  | 0  | 0         | 0                | 1       |
| AT2G36590 | 0  | 0  | 0  | 0  | 0 | 1  | 0  | 0         | 0                | 1       |
| AT2G36640 | 0  | 0  | 0  | 0  | 0 | -1 | 0  | -1        | 0                | -1      |
| AT2G36695 | 0  | 0  | 0  | 0  | 0 | 1  | 0  | 0         | 0                | 1       |
| AT2G36730 | 0  | 0  | 0  | 0  | 0 | 0  | -1 | 0         | 0                | -1      |
| AT2G36820 | 0  | 0  | 0  | 1  | 0 | 0  | 0  | 0         | 0                | 1       |
| AT2G36830 | 0  | 0  | 0  | 0  | 0 | 0  | 1  | 0         | 0                | 1       |
| AT2G36870 | 0  | 0  | 0  | 0  | 0 | 0  | 0  | -1        | 0                | -1      |
| AT2G36880 | 0  | 0  | 0  | 0  | 0 | 0  | 1  | 0         | 0                | 1       |
| AT2G36900 | 0  | 0  | 0  | 0  | 0 | 0  | -1 | 0         | 0                | -1      |
| AT2G36910 | -1 | -1 | 0  | 0  | 0 | 0  | 0  | 0         | 0                | -1      |
| AT2G36930 | 0  | 0  | 0  | 0  | 0 | 0  | -1 | 0         | 0                | -1      |
| AT2G36950 | 0  | 0  | 0  | -1 | 0 | 0  | 0  | 0         | 0                | -1      |
| AT2G36970 | -1 | -1 | 0  | 0  | 0 | -1 | 0  | 0         | 0                | -1      |
| AT2G37030 | -1 | -1 | 0  | 0  | 0 | -1 | -1 | -1        | -1               | -1      |
| AT2G37040 | 0  | 0  | 0  | 0  | 0 | 0  | 1  | 0         | 0                | 1       |
| AT2G37120 | 0  | 0  | 0  | 0  | 0 | 0  | -1 | 0         | 0                | -1      |

Appendix Table S1

| Name      | 1  | 2  | 3  | 4  | 5 | 6  | 7  | bes1D_Col | bes1Dpif45_pif45 | ALL_BES |
|-----------|----|----|----|----|---|----|----|-----------|------------------|---------|
| AT2G37130 | 0  | 0  | 0  | 1  | 0 | 1  | 1  | 0         | 0                | 1       |
| AT2G37170 | 0  | 0  | 0  | 0  | 0 | 0  | 1  | 0         | 0                | 1       |
| AT2G37180 | 0  | 0  | 0  | 0  | 0 | 0  | 1  | 0         | 0                | 1       |
| AT2G37220 | 0  | 0  | 0  | 0  | 0 | 0  | -1 | 0         | 0                | -1      |
| AT2G37270 | 0  | 0  | 0  | 0  | 0 | 0  | -1 | 0         | 0                | -1      |
| AT2G37340 | 0  | 0  | 0  | 0  | 0 | 0  | -1 | 0         | 0                | -1      |
| AT2G37380 | 1  | 1  | 0  | 0  | 0 | 0  | 0  | 0         | 0                | 1       |
| AT2G37430 | 0  | 0  | 0  | 1  | 0 | 0  | 0  | 1         | 0                | 1       |
| AT2G37500 | 0  | 0  | -1 | 0  | 0 | 0  | 0  | 0         | 0                | -1      |
| AT2G37600 | 0  | 0  | 0  | 0  | 0 | 0  | -1 | 0         | 0                | -1      |
| AT2G37640 | 0  | 0  | 0  | 1  | 0 | 0  | 0  | 0         | 0                | 1       |
| AT2G37660 | 0  | 0  | 0  | 0  | 0 | 0  | -1 | 0         | 0                | -1      |
| AT2G37710 | 0  | 0  | 0  | 1  | 0 | 0  | 1  | 0         | 0                | 1       |
| AT2G37750 | 0  | 0  | 0  | 0  | 0 | 0  | 1  | 0         | 0                | 1       |
| AT2G37760 | 0  | 0  | 0  | 0  | 0 | 0  | -1 | 0         | 0                | -1      |
| AT2G37790 | 0  | 0  | 0  | 0  | 0 | -1 | -1 | 0         | 0                | -1      |
| AT2G37820 | 0  | 0  | 0  | 0  | 0 | -1 | 0  | 0         | 0                | -1      |
| AT2G37830 | 0  | 0  | 0  | 0  | 0 | 1  | 0  | 0         | 0                | 1       |
| AT2G37870 | 0  | 0  | 0  | 0  | 0 | 0  | 0  | -1        | -1               | -1      |
| AT2G37920 | 0  | 0  | 0  | 0  | 0 | 0  | -1 | 0         | 0                | -1      |
| AT2G37940 | 1  | 1  | 0  | 1  | 0 | 0  | 1  | 0         | 0                | 1       |
| AT2G37950 | 0  | 0  | 1  | 0  | 0 | 0  | 0  | 0         | 0                | 1       |
| AT2G37980 | 0  | 0  | 0  | 0  | 0 | 1  | 0  | 0         | 0                | 1       |
| AT2G38000 | 0  | 0  | -1 | 0  | 0 | 0  | 0  | 0         | 0                | -1      |
| AT2G38080 | 0  | 0  | 0  | 0  | 0 | 0  | 1  | 0         | 0                | 1       |
| AT2G38140 | 0  | 0  | 0  | 0  | 0 | 0  | -1 | 0         | 0                | -1      |
| AT2G38230 | 0  | 0  | 0  | -1 | 0 | 0  | 0  | 0         | 0                | -1      |
| AT2G38300 | 0  | 0  | 0  | 0  | 0 | -1 | 0  | 0         | 0                | -1      |
| AT2G38330 | 0  | 0  | 0  | 0  | 0 | 0  | -1 | 0         | 0                | -1      |
| AT2G38380 | 0  | 0  | 0  | 0  | 0 | -1 | 0  | 0         | 0                | -1      |
| AT2G38390 | 0  | 0  | 0  | 0  | 0 | -1 | 0  | 0         | 0                | -1      |
| AT2G38480 | 1  | 1  | 0  | 0  | 0 | 1  | 0  | 0         | 0                | 1       |
| AT2G38490 | 0  | 0  | 0  | 0  | 0 | 1  | 0  | 0         | 0                | 1       |
| AT2G38540 | 0  | 0  | 0  | 0  | 0 | 0  | -1 | 0         | 0                | -1      |
| AT2G38610 | 1  | 1  | 1  | 1  | 0 | 0  | 1  | 0         | 0                | 1       |
| AT2G38620 | 0  | 0  | 0  | 0  | 0 | 1  | 0  | 0         | 0                | 1       |
| AT2G38660 | 0  | 0  | -1 | 0  | 0 | 0  | 0  | 0         | 0                | -1      |
| AT2G38740 | 0  | 0  | 0  | 1  | 0 | 0  | 0  | 0         | 0                | 1       |
| AT2G38750 | 0  | 0  | 0  | 0  | 0 | 0  | 1  | 0         | 0                | 1       |
| AT2G38760 | 0  | 0  | 0  | 0  | 0 | 0  | 1  | 0         | 0                | 1       |
| AT2G38790 | 0  | 0  | 0  | 0  | 0 | 1  | 1  | 0         | 0                | 1       |
| AT2G38820 | 0  | -1 | 0  | 0  | 0 | 0  | 0  | 0         | 0                | -1      |
| AT2G38823 | 0  | 0  | 0  | 0  | 0 | 0  | 0  | 1         | 0                | 1       |
| AT2G38860 | 0  | 0  | 0  | 0  | 0 | 0  | 0  | 1         | 1                | 1       |
| AT2G38870 | 0  | 0  | 0  | 0  | 0 | 0  | 0  | 0         | 1                | 1       |
| AT2G38940 | -1 | 0  | 0  | 0  | 0 | 0  | 0  | 0         | 0                | -1      |
| AT2G39010 | 0  | 0  | 0  | 1  | 0 | 0  | 1  | 0         | 0                | 1       |
| AT2G39040 | 0  | 0  | 0  | 0  | 0 | -1 | 0  | 0         | 0                | -1      |
| AT2G39050 | 0  | 0  | 0  | 0  | 0 | 0  | 1  | 0         | 0                | 1       |
| AT2G39080 | 0  | 0  | 0  | 0  | 0 | 0  | -1 | 0         | 0                | -1      |
| AT2G39130 | 0  | 0  | 0  | 0  | 0 | 0  | 1  | 0         | 0                | 1       |
| AT2G39140 | 0  | 0  | 0  | 0  | 0 | 0  | -1 | 0         | 0                | -1      |
| AT2G39180 | 0  | 0  | 0  | 0  | 0 | 0  | 1  | 0         | 0                | 1       |
| AT2G39200 | 0  | 0  | 0  | 0  | 0 | 1  | 0  | 0         | 0                | 1       |
| AT2G39240 | 0  | 0  | 0  | 0  | 0 | -1 | 0  | 0         | 0                | -1      |
| AT2G39250 | 0  | 0  | 0  | 0  | 0 | 0  | 0  | -1        | 0                | -1      |
| AT2G39310 | 0  | 0  | 0  | 0  | 0 | -1 | 0  | -1        | -1               | -1      |
| AT2G39330 | 0  | 0  | 0  | 0  | 0 | -1 | 0  | 0         | 0                | -1      |
| AT2G39340 | 0  | 0  | -1 | 0  | 0 | 0  | 0  | 0         | 0                | -1      |
| AT2G39360 | 0  | 0  | 0  | 0  | 0 | 0  | 1  | 0         | 0                | 1       |
| AT2G39430 | 0  | 0  | 0  | 0  | 0 | 1  | 1  | 0         | 0                | 1       |

Appendix Table S1

| Name      | 1  | 2  | 3  | 4  | 5 | 6  | 7  | bes1D_Col | bes1Dpif45_pif45 | ALL_BES |
|-----------|----|----|----|----|---|----|----|-----------|------------------|---------|
| AT2G39440 | 0  | 0  | 0  | 0  | 0 | 0  | 1  | 0         | 0                | 1       |
| AT2G39450 | -1 | -1 | 0  | 0  | 0 | 0  | 0  | 0         | 0                | -1      |
| AT2G39470 | 0  | 0  | 0  | 0  | 0 | 0  | -1 | 0         | 0                | -1      |
| AT2G39480 | 0  | 0  | 0  | 0  | 0 | 0  | 1  | 0         | 0                | 1       |
| AT2G39510 | 0  | 0  | 0  | -1 | 0 | 0  | 0  | 0         | 0                | -1      |
| AT2G39660 | 0  | 0  | -1 | 0  | 0 | 0  | 0  | 0         | 0                | -1      |
| AT2G39700 | 0  | 0  | 0  | 0  | 0 | 0  | 1  | 0         | 0                | 1       |
| AT2G39730 | 0  | 0  | 0  | 0  | 0 | 0  | -1 | 0         | 0                | -1      |
| AT2G39850 | 0  | 0  | 0  | 0  | 0 | -1 | 0  | 0         | 0                | -1      |
| AT2G39870 | 0  | 0  | 0  | 0  | 0 | 0  | 1  | 0         | 0                | 1       |
| AT2G39910 | 0  | 0  | 0  | 0  | 0 | 0  | -1 | 0         | 0                | -1      |
| AT2G39930 | 0  | 0  | 0  | 0  | 0 | 0  | -1 | 0         | 0                | -1      |
| AT2G40000 | 0  | 1  | 0  | 0  | 0 | 0  | 0  | 0         | 0                | 1       |
| AT2G40010 | 0  | 0  | -1 | 0  | 0 | 0  | -1 | 0         | 0                | -1      |
| AT2G40080 | 0  | 0  | 0  | 0  | 0 | 0  | 0  | -1        | 0                | -1      |
| AT2G40085 | 0  | 0  | 0  | 0  | 0 | -1 | 0  | 0         | 0                | -1      |
| AT2G40090 | 0  | 0  | 1  | 0  | 0 | 0  | 1  | 0         | 0                | 1       |
| AT2G40113 | 0  | 0  | 0  | 0  | 0 | 1  | 0  | 0         | 0                | 1       |
| AT2G40150 | 0  | 0  | 0  | 0  | 0 | 0  | -1 | 0         | 0                | -1      |
| AT2G40170 | 0  | 0  | 0  | 0  | 0 | -1 | 0  | 0         | 0                | -1      |
| AT2G40180 | 0  | 0  | 0  | 0  | 0 | 0  | 0  | 1         | 0                | 1       |
| AT2G40205 | 0  | 0  | 0  | 0  | 0 | 0  | -1 | 0         | 0                | -1      |
| AT2G40270 | 0  | 0  | 1  | 1  | 0 | 0  | 0  | 0         | 0                | 1       |
| AT2G40290 | 0  | 0  | 0  | 1  | 0 | 0  | 0  | 0         | 0                | 1       |
| AT2G40300 | 0  | 0  | 0  | 1  | 0 | 0  | 0  | 0         | 0                | 1       |
| AT2G40316 | 0  | 0  | 0  | 0  | 0 | 0  | -1 | 0         | 0                | -1      |
| AT2G40330 | 0  | 0  | 0  | 0  | 0 | 0  | 0  | 1         | 1                | 1       |
| AT2G40370 | 0  | 0  | 0  | 0  | 0 | 1  | 0  | 0         | 1                | 1       |
| AT2G40460 | 0  | 0  | 0  | 0  | 0 | 1  | 0  | 0         | 0                | 1       |
| AT2G40470 | 0  | 0  | 0  | 0  | 0 | 1  | 0  | 0         | 0                | 1       |
| AT2G40490 | 0  | 0  | 0  | 0  | 0 | 0  | -1 | 0         | 0                | -1      |
| AT2G40540 | 0  | 0  | -1 | -1 | 0 | 0  | 0  | 0         | 0                | -1      |
| AT2G40610 | 0  | 1  | 0  | 1  | 1 | 1  | 1  | 0         | 0                | 1       |
| AT2G40670 | 0  | 0  | 0  | 0  | 0 | -1 | 0  | -1        | -1               | -1      |
| AT2G40710 | 0  | 0  | 0  | 0  | 0 | 0  | -1 | 0         | 0                | -1      |
| AT2G40711 | 0  | 0  | 0  | 0  | 0 | 1  | 0  | 0         | 0                | 1       |
| AT2G40730 | 0  | 0  | 0  | 0  | 0 | 0  | 1  | 0         | 0                | 1       |
| AT2G40740 | 0  | 0  | 0  | 0  | 0 | 0  | 0  | 1         | 1                | 1       |
| AT2G40760 | 0  | 0  | 0  | 0  | 0 | 0  | -1 | 0         | 0                | -1      |
| AT2G40950 | 0  | 0  | 0  | 0  | 0 | 0  | -1 | 0         | 0                | -1      |
| AT2G40970 | 0  | 0  | 0  | 0  | 0 | 0  | -1 | 0         | 0                | -1      |
| AT2G41010 | 0  | 0  | 0  | 0  | 0 | 0  | -1 | 0         | 0                | -1      |
| AT2G41070 | 0  | 0  | 0  | 0  | 0 | 0  | -1 | 0         | 0                | -1      |
| AT2G41090 | 1  | 1  | 0  | 1  | 0 | 0  | 0  | 1         | 1                | 1       |
| AT2G41100 | 0  | 0  | 0  | 0  | 0 | 1  | 1  | 1         | 1                | 1       |
| AT2G41110 | 0  | 0  | 0  | 0  | 0 | 0  | 1  | 0         | 0                | 1       |
| AT2G41170 | 0  | 0  | 0  | 1  | 0 | 1  | 0  | 0         | 0                | 1       |
| AT2G41180 | 0  | 0  | 0  | 0  | 0 | 1  | 0  | 0         | 0                | 1       |
| AT2G41190 | 0  | 0  | 0  | 0  | 0 | 1  | 0  | 0         | 0                | 1       |
| AT2G41250 | -1 | -1 | 0  | 0  | 0 | 0  | 0  | 0         | 0                | -1      |
| AT2G41260 | 0  | 0  | 0  | 0  | 0 | -1 | 0  | 0         | 0                | -1      |
| AT2G41300 | 0  | 0  | 0  | 0  | 0 | 0  | 1  | 0         | 0                | 1       |
| AT2G41380 | -1 | -1 | -1 | 0  | 0 | 0  | 0  | 0         | 0                | -1      |
| AT2G41420 | 0  | 0  | 1  | 0  | 0 | 0  | 0  | 0         | 0                | 1       |
| AT2G41480 | 0  | 0  | 0  | 0  | 0 | 1  | 1  | 0         | 1                | 1       |
| AT2G41530 | 0  | 0  | 0  | 0  | 0 | 0  | -1 | 0         | 0                | -1      |
| AT2G41540 | 1  | 0  | 0  | 1  | 0 | 0  | 1  | 0         | 0                | 1       |
| AT2G41560 | 0  | 0  | 0  | 0  | 0 | 0  | -1 | 0         | 0                | -1      |
| AT2G41640 | 1  | 1  | 0  | 0  | 0 | 1  | 1  | 0         | 0                | 1       |
| AT2G41690 | 0  | 0  | 0  | 0  | 0 | -1 | 0  | 0         | 0                | -1      |
| AT2G41730 | 0  | 0  | 0  | 0  | 0 | 1  | 0  | 0         | 0                | 1       |

Appendix Table S1

| Name      | 1  | 2  | 3  | 4  | 5 | 6  | 7  | bes1D_Col | bes1Dpif45_pif45 | ALL_BES |
|-----------|----|----|----|----|---|----|----|-----------|------------------|---------|
| AT2G41740 | 0  | 0  | 0  | 0  | 0 | 0  | 1  | 0         | 0                | 1       |
| AT2G41760 | 0  | 0  | 0  | 0  | 0 | 0  | -1 | 0         | 0                | -1      |
| AT2G41800 | 0  | 0  | 0  | -1 | 0 | -1 | 0  | 0         | 0                | -1      |
| AT2G41810 | 0  | 0  | 0  | 0  | 0 | 0  | 0  | -1        | -1               | -1      |
| AT2G41820 | 1  | 1  | 1  | 0  | 0 | 0  | 0  | 0         | 0                | 1       |
| AT2G41840 | 0  | 0  | 0  | 0  | 0 | 0  | -1 | 0         | 0                | -1      |
| AT2G41850 | 0  | 0  | 0  | 0  | 0 | 0  | 0  | 1         | 0                | 1       |
| AT2G41880 | 1  | 0  | 0  | 0  | 0 | 0  | 0  | 0         | 0                | 1       |
| AT2G41890 | 0  | 0  | 0  | 0  | 0 | 0  | -1 | 0         | 0                | -1      |
| AT2G41950 | 0  | 0  | 0  | 0  | 0 | 0  | -1 | 0         | 0                | -1      |
| AT2G41970 | 0  | 0  | 0  | 0  | 0 | -1 | 0  | 0         | -1               | -1      |
| AT2G41990 | 0  | 0  | 0  | 0  | 0 | 0  | -1 | -1        | 0                | -1      |
| AT2G42040 | 0  | 0  | 0  | 0  | 0 | 0  | 1  | 0         | 0                | 1       |
| AT2G42060 | 0  | 0  | 0  | 0  | 0 | 1  | 0  | 1         | 0                | 1       |
| AT2G42110 | 0  | 0  | 0  | 0  | 0 | 1  | 0  | 0         | 0                | 1       |
| AT2G42130 | 0  | 0  | 0  | 0  | 0 | 0  | -1 | 0         | 0                | -1      |
| AT2G42150 | 0  | 0  | 0  | 0  | 0 | 1  | 0  | 0         | 0                | 1       |
| AT2G42160 | 0  | 0  | 1  | 0  | 0 | 0  | 0  | 0         | 0                | 1       |
| AT2G42210 | 0  | 0  | 0  | 0  | 0 | 0  | -1 | 0         | 0                | -1      |
| AT2G42220 | 0  | 0  | 0  | 0  | 0 | 0  | -1 | 0         | 0                | -1      |
| AT2G42280 | 0  | 0  | -1 | 0  | 0 | 0  | 0  | 0         | 0                | -1      |
| AT2G42380 | 0  | 1  | 0  | 0  | 0 | 1  | 0  | 0         | 0                | 1       |
| AT2G42560 | 0  | 0  | 0  | 0  | 0 | -1 | 0  | 0         | 0                | -1      |
| AT2G42580 | 0  | 1  | 1  | 0  | 0 | 0  | 0  | 0         | 0                | 1       |
| AT2G42610 | 0  | 0  | 0  | 1  | 0 | 0  | 0  | 0         | 0                | 1       |
| AT2G42620 | 0  | 0  | 0  | 0  | 0 | 0  | -1 | 0         | 0                | -1      |
| AT2G42660 | 0  | 0  | 0  | 0  | 0 | 1  | 0  | 0         | 0                | 1       |
| AT2G42670 | 0  | 0  | 0  | 0  | 0 | 0  | -1 | 0         | 0                | -1      |
| AT2G42740 | 0  | 0  | 0  | 0  | 0 | 0  | -1 | 0         | 0                | -1      |
| AT2G42750 | 0  | 0  | 0  | -1 | 0 | 0  | 0  | 0         | 0                | -1      |
| AT2G42800 | 0  | 0  | 0  | 0  | 0 | 0  | -1 | 0         | 0                | -1      |
| AT2G42870 | 0  | 0  | 0  | 0  | 0 | 0  | -1 | 0         | 0                | -1      |
| AT2G42900 | 0  | 0  | 0  | 0  | 0 | 0  | 1  | 0         | 0                | 1       |
| AT2G42950 | -1 | -1 | 0  | 0  | 0 | 0  | 0  | 0         | 0                | -1      |
| AT2G42990 | 0  | 0  | 0  | 0  | 0 | 0  | 1  | 0         | 0                | 1       |
| AT2G43000 | 0  | 0  | 0  | 0  | 0 | 1  | 0  | 1         | 1                | 1       |
| AT2G43030 | 0  | 0  | 0  | 0  | 0 | 0  | -1 | 0         | 0                | -1      |
| AT2G43040 | 0  | 0  | 0  | 0  | 0 | 0  | 1  | 0         | 0                | 1       |
| AT2G43050 | 0  | 0  | 0  | 0  | 0 | 1  | 1  | 0         | 0                | 1       |
| AT2G43100 | -1 | -1 | 0  | 0  | 0 | 0  | 0  | 0         | 0                | -1      |
| AT2G43230 | 0  | 0  | 0  | 0  | 0 | -1 | 0  | 0         | 0                | -1      |
| AT2G43280 | 0  | -1 | 0  | 0  | 0 | 0  | 0  | 0         | 0                | -1      |
| AT2G43290 | 1  | 1  | 1  | 1  | 1 | 1  | 1  | 0         | 0                | 1       |
| AT2G43320 | 0  | 0  | 0  | 0  | 0 | 0  | 1  | 0         | 0                | 1       |
| AT2G43340 | 0  | 0  | 0  | 1  | 0 | 0  | 0  | 0         | 0                | 1       |
| AT2G43390 | 0  | 0  | 0  | 0  | 0 | 0  | 0  | 0         | 1                | 1       |
| AT2G43440 | 0  | 0  | 0  | -1 | 0 | 0  | 0  | 0         | 0                | -1      |
| AT2G43510 | 0  | 0  | 0  | 1  | 0 | 0  | 0  | 0         | 0                | 1       |
| AT2G43520 | 0  | 0  | 0  | 0  | 0 | 0  | -1 | 0         | 0                | -1      |
| AT2G43560 | 0  | 0  | 0  | 0  | 0 | 0  | -1 | 0         | 0                | -1      |
| AT2G43620 | 0  | 0  | 0  | 0  | 0 | 1  | 0  | 1         | 1                | 1       |
| AT2G43630 | 0  | 0  | 0  | 0  | 0 | 0  | -1 | 0         | 0                | -1      |
| AT2G43640 | 0  | 0  | 0  | 0  | 0 | 0  | -1 | 0         | 0                | -1      |
| AT2G43670 | 0  | 0  | 0  | 0  | 0 | -1 | 0  | 0         | 0                | -1      |
| AT2G43750 | 0  | 0  | 0  | 0  | 0 | 0  | -1 | 0         | 0                | -1      |
| AT2G43910 | 0  | 0  | 0  | -1 | 0 | 0  | -1 | 0         | 0                | -1      |
| AT2G44050 | 0  | 0  | 0  | 0  | 0 | 0  | -1 | 0         | 0                | -1      |
| AT2G44110 | 0  | 0  | 0  | 0  | 0 | -1 | 0  | 0         | 0                | -1      |
| AT2G44120 | 0  | 0  | 0  | 0  | 0 | 0  | -1 | 0         | 0                | -1      |
| AT2G44130 | 0  | 0  | 0  | 1  | 0 | 0  | 0  | 0         | 0                | 1       |
| AT2G44190 | 0  | 0  | 0  | 0  | 0 | 1  | 0  | 0         | 0                | 1       |

Appendix Table S1

| Name      | 1  | 2  | 3  | 4  | 5 | 6  | 7  | bes1D_Col | bes1Dpif45_pif45 | ALL_BES |
|-----------|----|----|----|----|---|----|----|-----------|------------------|---------|
| AT2G44220 | 0  | 0  | 0  | 0  | 0 | 1  | 0  | 0         | 0                | 1       |
| AT2G44230 | 1  | 1  | 0  | 0  | 0 | 1  | 0  | 0         | 0                | 1       |
| AT2G44290 | 0  | 0  | 0  | 1  | 0 | 0  | 0  | 0         | 0                | 1       |
| AT2G44350 | 0  | 0  | 0  | 0  | 0 | 0  | 1  | 0         | 0                | 1       |
| AT2G44370 | 0  | 0  | 0  | 0  | 0 | 0  | 0  | 1         | 0                | 1       |
| AT2G44380 | 0  | 0  | 0  | 0  | 0 | 1  | 0  | 0         | 0                | 1       |
| AT2G44390 | 0  | 0  | 0  | 1  | 0 | 0  | 0  | 0         | 0                | 1       |
| AT2G44450 | 0  | 0  | 0  | 0  | 0 | 0  | 1  | 0         | 0                | 1       |
| AT2G44500 | 1  | 1  | 1  | 1  | 0 | 1  | 1  | 0         | 0                | 1       |
| AT2G44578 | 0  | 0  | 0  | 0  | 0 | 0  | 0  | 1         | 0                | 1       |
| AT2G44640 | 0  | 0  | 0  | 0  | 0 | 0  | -1 | 0         | 0                | -1      |
| AT2G44650 | 0  | 0  | 0  | 0  | 0 | 0  | -1 | 0         | 0                | -1      |
| AT2G44660 | 0  | 0  | 0  | 0  | 0 | 0  | -1 | 0         | 0                | -1      |
| AT2G44740 | 1  | 1  | 0  | 0  | 0 | 0  | 1  | 0         | 0                | 1       |
| AT2G44790 | 0  | 0  | 0  | 0  | 0 | 0  | 1  | 0         | 0                | 1       |
| AT2G44840 | 0  | 0  | 0  | 1  | 0 | 0  | 0  | 0         | 0                | 1       |
| AT2G44900 | 0  | 0  | 0  | 0  | 0 | 0  | -1 | 0         | 0                | -1      |
| AT2G44910 | 0  | 0  | 0  | 0  | 0 | -1 | -1 | 0         | 0                | -1      |
| AT2G44920 | 0  | 0  | 0  | 0  | 0 | 0  | -1 | 0         | 0                | -1      |
| AT2G45040 | 0  | 0  | 0  | 0  | 0 | 1  | 0  | 0         | 0                | 1       |
| AT2G45050 | -1 | -1 | 0  | -1 | 0 | 0  | -1 | 0         | 0                | -1      |
| AT2G45160 | 0  | 0  | 0  | 0  | 0 | 0  | -1 | 0         | 0                | -1      |
| AT2G45180 | 0  | 0  | 0  | 0  | 0 | 1  | 1  | 0         | 0                | 1       |
| AT2G45210 | -1 | -1 | 0  | -1 | 0 | 0  | 0  | 0         | -1               | -1      |
| AT2G45240 | 0  | 0  | 0  | 0  | 0 | 0  | -1 | 0         | 0                | -1      |
| AT2G45250 | 0  | 0  | 0  | 0  | 0 | 0  | -1 | 0         | 0                | -1      |
| AT2G45400 | 0  | 1  | 1  | 0  | 0 | 0  | 1  | 0         | 0                | 1       |
| AT2G45450 | 0  | 0  | 1  | 0  | 0 | 0  | 0  | 0         | 0                | 1       |
| AT2G45550 | 0  | 0  | 0  | 1  | 0 | 0  | 0  | 0         | 0                | 1       |
| AT2G45660 | 0  | 0  | 0  | 0  | 0 | -1 | 0  | 0         | 0                | -1      |
| AT2G45680 | 0  | 0  | -1 | 0  | 0 | 0  | 0  | 0         | 0                | -1      |
| AT2G45720 | 0  | 0  | 0  | 0  | 0 | 0  | 1  | 0         | 0                | 1       |
| AT2G45750 | 0  | 0  | 0  | 0  | 0 | -1 | 0  | 0         | 0                | -1      |
| AT2G45760 | 0  | 0  | 0  | 0  | 0 | 0  | 0  | 1         | 1                | 1       |
| AT2G45890 | 0  | 0  | 0  | 0  | 0 | 0  | 1  | 0         | 0                | 1       |
| AT2G46070 | 0  | 0  | 0  | 0  | 0 | 0  | -1 | 0         | 0                | -1      |
| AT2G46090 | 0  | 0  | 0  | 0  | 0 | 0  | -1 | 0         | 0                | -1      |
| AT2G46140 | 0  | 0  | 0  | 0  | 0 | 0  | 1  | 0         | 0                | 1       |
| AT2G46225 | -1 | 0  | -1 | 0  | 0 | 0  | 0  | 0         | 0                | -1      |
| AT2G46270 | 0  | 0  | 0  | 0  | 0 | 0  | 1  | 0         | 0                | 1       |
| AT2G46280 | 0  | 0  | 0  | 0  | 0 | 0  | -1 | 0         | 0                | -1      |
| AT2G46290 | 0  | 0  | 0  | 0  | 0 | 0  | -1 | 0         | 0                | -1      |
| AT2G46400 | 0  | 0  | 0  | 0  | 0 | 1  | 0  | 1         | 0                | 1       |
| AT2G46430 | 0  | 0  | 0  | 0  | 0 | 0  | 0  | 1         | 0                | 1       |
| AT2G46470 | 0  | 0  | 0  | 0  | 0 | 0  | -1 | 0         | 0                | -1      |
| AT2G46535 | 0  | 0  | 0  | 0  | 0 | 1  | 0  | 0         | 0                | 1       |
| AT2G46580 | 0  | 0  | 0  | 0  | 0 | 0  | -1 | 0         | 0                | -1      |
| AT2G46600 | -1 | -1 | 0  | 0  | 0 | 0  | -1 | 0         | 0                | -1      |
| AT2G46610 | 0  | 0  | 0  | 0  | 0 | 0  | -1 | 0         | 0                | -1      |
| AT2G46640 | 0  | 0  | 0  | 0  | 0 | 0  | 0  | 0         | 1                | 1       |
| AT2G46650 | 0  | 0  | 0  | 0  | 0 | 0  | 0  | 1         | 1                | 1       |
| AT2G46660 | -1 | -1 | 0  | -1 | 0 | 0  | -1 | 0         | 0                | -1      |
| AT2G46680 | 0  | 0  | 0  | 0  | 0 | 0  | 1  | 0         | 0                | 1       |
| AT2G46690 | 0  | 0  | 0  | 0  | 0 | 0  | 1  | 0         | 0                | 1       |
| AT2G46710 | 0  | 0  | 0  | 0  | 0 | 0  | 1  | 0         | 0                | 1       |
| AT2G46720 | 0  | 0  | 0  | 0  | 0 | 0  | -1 | 0         | 0                | -1      |
| AT2G46740 | -1 | -1 | 0  | 0  | 0 | 0  | 0  | 0         | 0                | -1      |
| AT2G46750 | 0  | 0  | 0  | 0  | 0 | 0  | 0  | 1         | 1                | 1       |
| AT2G46780 | 0  | 0  | 1  | 0  | 0 | 1  | 1  | 0         | 0                | 1       |
| AT2G46820 | 0  | 0  | 0  | 0  | 0 | 0  | -1 | 0         | 0                | -1      |
| AT2G46850 | 0  | 0  | 0  | 0  | 0 | -1 | 0  | 0         | 0                | -1      |



Appendix Table S1

| Name      | 1  | 2  | 3  | 4  | 5 | 6  | 7  | bes1D_Col | bes1Dpif45_pif45 | ALL_BES |
|-----------|----|----|----|----|---|----|----|-----------|------------------|---------|
| AT2G46900 | 0  | 0  | 0  | 0  | 0 | 0  | -1 | 0         | 0                | -1      |
| AT2G46910 | 0  | 0  | 0  | 0  | 0 | 0  | -1 | 0         | 0                | -1      |
| AT2G46930 | -1 | -1 | -1 | 0  | 0 | 0  | 0  | 0         | 0                | -1      |
| AT2G46990 | 0  | 0  | 0  | 0  | 0 | 0  | -1 | 0         | 0                | -1      |
| AT2G47000 | 0  | 0  | 0  | 0  | 0 | 0  | 1  | 0         | 0                | 1       |
| AT2G47060 | 1  | 1  | 0  | 1  | 0 | 0  | 0  | 0         | 0                | 1       |
| AT2G47130 | 0  | 0  | 0  | 1  | 0 | 0  | 0  | 0         | 0                | 1       |
| AT2G47160 | 0  | 0  | 0  | 0  | 0 | 0  | -1 | 0         | 0                | -1      |
| AT2G47240 | 0  | 0  | 1  | 0  | 0 | 0  | 0  | 0         | 1                | 1       |
| AT2G47250 | 0  | 0  | -1 | 0  | 0 | 0  | 0  | 0         | 0                | -1      |
| AT2G47440 | 1  | 1  | 0  | 1  | 0 | 0  | 1  | 0         | 0                | 1       |
| AT2G47450 | 0  | 0  | 0  | 0  | 0 | 0  | -1 | 0         | 0                | -1      |
| AT2G47470 | 0  | 0  | 0  | 0  | 0 | 0  | 1  | 0         | 0                | 1       |
| AT2G47500 | 0  | 0  | 0  | 0  | 0 | 1  | 1  | 0         | 0                | 1       |
| AT2G47520 | 0  | 0  | 0  | -1 | 0 | 0  | 0  | 0         | 0                | -1      |
| AT2G47540 | 0  | 0  | 0  | 0  | 0 | -1 | 0  | 0         | 0                | -1      |
| AT2G47590 | 0  | 0  | 0  | -1 | 0 | 0  | -1 | 0         | 0                | -1      |
| AT2G47770 | 0  | 0  | 0  | 0  | 0 | 0  | 0  | -1        | 0                | -1      |
| AT2G47780 | 0  | 0  | 0  | -1 | 0 | 0  | 0  | 0         | 0                | -1      |
| AT2G47840 | 0  | 0  | 0  | 0  | 0 | 0  | -1 | 0         | 0                | -1      |
| AT2G47860 | 0  | 0  | 0  | 0  | 0 | 0  | 1  | 0         | 0                | 1       |
| AT2G47910 | 0  | 0  | 0  | 0  | 0 | 0  | -1 | 0         | 0                | -1      |
| AT2G47930 | 0  | 0  | 0  | 0  | 0 | 0  | -1 | 0         | 0                | -1      |
| AT2G47990 | 0  | 0  | 0  | 0  | 0 | 0  | -1 | 0         | 0                | -1      |
| AT2G48070 | 0  | 0  | 0  | 0  | 0 | 0  | -1 | 0         | 0                | -1      |
| AT2G48130 | 0  | 0  | 0  | 0  | 0 | 1  | 0  | 0         | 0                | 1       |
| AT2G48140 | 0  | 0  | 0  | 0  | 0 | 0  | 0  | 0         | 1                | 1       |
| AT3G01080 | 0  | 0  | 0  | 0  | 0 | 0  | 0  | 1         | 0                | 1       |
| AT3G01175 | 0  | 0  | 0  | 0  | 0 | 1  | 0  | 0         | 1                | 1       |
| AT3G01220 | 0  | 0  | 0  | 0  | 0 | 0  | 1  | 0         | 0                | 1       |
| AT3G01260 | 0  | 0  | 0  | 0  | 0 | 1  | 0  | 0         | 0                | 1       |
| AT3G01290 | 0  | 0  | 0  | 0  | 0 | 1  | 0  | 0         | 0                | 1       |
| AT3G01430 | 0  | 1  | 0  | 0  | 0 | 0  | 0  | 0         | 0                | 1       |
| AT3G01440 | 0  | 0  | 0  | 0  | 0 | 0  | 0  | -1        | 0                | -1      |
| AT3G01450 | 0  | 0  | 0  | 0  | 0 | -1 | -1 | 0         | 0                | -1      |
| AT3G01480 | 0  | 0  | 0  | 0  | 0 | 0  | -1 | 0         | 0                | -1      |
| AT3G01500 | 0  | 0  | 0  | 0  | 0 | 0  | -1 | -1        | 0                | -1      |
| AT3G01510 | 0  | 0  | -1 | 0  | 0 | 0  | 0  | 0         | 0                | -1      |
| AT3G01560 | 0  | 0  | 0  | 0  | 0 | 0  | -1 | 0         | 0                | -1      |
| AT3G01570 | 0  | 0  | 0  | 0  | 0 | -1 | 0  | 0         | 0                | -1      |
| AT3G01650 | 0  | 0  | 0  | 0  | 0 | 0  | 1  | 0         | 0                | 1       |
| AT3G01660 | 0  | 0  | 0  | 0  | 0 | 1  | 0  | 0         | 0                | 1       |
| AT3G01720 | 0  | 0  | 0  | 0  | 0 | 0  | 1  | 0         | 0                | 1       |
| AT3G01750 | 0  | 0  | 0  | 0  | 0 | 0  | -1 | 0         | 0                | -1      |
| AT3G01780 | 0  | 0  | 0  | 0  | 0 | 0  | 1  | 0         | 0                | 1       |
| AT3G01930 | 0  | 0  | 0  | 1  | 0 | 0  | 0  | 0         | 0                | 1       |
| AT3G01970 | 0  | 0  | 0  | 0  | 0 | 0  | 0  | 0         | 1                | 1       |
| AT3G02000 | 0  | 0  | 0  | 0  | 0 | 0  | -1 | 0         | 0                | -1      |
| AT3G02030 | 0  | 0  | 0  | 0  | 0 | 1  | 0  | 0         | 0                | 1       |
| AT3G02040 | 0  | 0  | 0  | 0  | 0 | 0  | 1  | 0         | 0                | 1       |
| AT3G02070 | 1  | 1  | 0  | 0  | 0 | 0  | 0  | 0         | 0                | 1       |
| AT3G02080 | 0  | 0  | 0  | 0  | 0 | 0  | -1 | 0         | 0                | -1      |
| AT3G02110 | 0  | 0  | 0  | 0  | 0 | 0  | 1  | 0         | 0                | 1       |
| AT3G02140 | 0  | 0  | 0  | 0  | 0 | 1  | 0  | 0         | 0                | 1       |
| AT3G02170 | 1  | 1  | 1  | 0  | 0 | 0  | 0  | 0         | 0                | 1       |
| AT3G02180 | 0  | 0  | 0  | 0  | 0 | 0  | -1 | 0         | 0                | -1      |
| AT3G02250 | 0  | 0  | 1  | 0  | 0 | 0  | 0  | 0         | 0                | 1       |
| AT3G02350 | 0  | 1  | 0  | 0  | 0 | 0  | 0  | 0         | 0                | 1       |
| AT3G02410 | 0  | 0  | 0  | 0  | 0 | 1  | 0  | 0         | 0                | 1       |
| AT3G02460 | 0  | 0  | 0  | 0  | 0 | 0  | 1  | 0         | 0                | 1       |
| AT3G02500 | 0  | 0  | 0  | 0  | 0 | -1 | 0  | 0         | -1               | -1      |



Appendix Table S1

| Name      | 1 | 2  | 3  | 4 | 5 | 6  | 7  | bes1D_Col | bes1Dpif45_pif45 | ALL_BES |
|-----------|---|----|----|---|---|----|----|-----------|------------------|---------|
| AT3G05660 | 0 | 0  | 0  | 0 | 0 | -1 | 0  | 0         | 0                | -1      |
| AT3G05727 | 0 | 0  | 0  | 0 | 0 | -1 | 0  | 0         | 0                | -1      |
| AT3G05730 | 0 | 0  | 0  | 0 | 0 | 0  | -1 | 0         | 0                | -1      |
| AT3G05760 | 0 | 0  | 0  | 0 | 0 | -1 | 0  | 0         | 0                | -1      |
| AT3G05770 | 0 | 0  | 0  | 0 | 0 | 0  | 0  | 0         | -1               | -1      |
| AT3G05780 | 0 | 0  | 0  | 0 | 0 | 1  | 0  | 0         | 0                | 1       |
| AT3G05800 | 1 | 1  | 1  | 0 | 0 | 0  | 0  | 0         | 0                | 1       |
| AT3G05810 | 0 | 0  | 0  | 0 | 0 | 0  | -1 | 0         | 0                | -1      |
| AT3G05890 | 0 | 0  | 0  | 0 | 0 | 0  | 1  | 0         | 0                | 1       |
| AT3G05900 | 1 | 1  | 0  | 0 | 0 | 0  | 0  | 0         | 0                | 1       |
| AT3G05910 | 0 | 1  | 0  | 0 | 0 | 0  | 1  | 0         | 0                | 1       |
| AT3G05920 | 0 | 0  | 0  | 0 | 0 | 0  | 1  | 0         | 0                | 1       |
| AT3G05932 | 0 | 0  | 0  | 0 | 0 | -1 | 0  | 0         | 0                | -1      |
| AT3G05936 | 0 | 0  | 0  | 0 | 0 | 0  | 0  | 0         | 1                | 1       |
| AT3G05950 | 0 | 0  | 0  | 0 | 0 | -1 | 0  | 0         | 0                | -1      |
| AT3G05980 | 0 | 0  | 0  | 0 | 0 | 1  | 0  | 0         | 0                | 1       |
| AT3G06070 | 0 | 0  | 0  | 0 | 0 | 1  | 1  | 0         | 0                | 1       |
| AT3G06180 | 0 | 0  | 0  | 0 | 0 | 0  | -1 | 0         | 0                | -1      |
| AT3G06200 | 0 | 0  | 0  | 0 | 0 | 0  | -1 | 0         | 0                | -1      |
| AT3G06370 | 0 | 0  | 0  | 0 | 0 | 0  | 1  | 0         | 0                | 1       |
| AT3G06390 | 0 | 0  | 0  | 0 | 0 | 0  | 0  | 0         | 1                | 1       |
| AT3G06433 | 0 | 0  | 0  | 0 | 0 | -1 | 0  | 0         | 0                | -1      |
| AT3G06450 | 1 | 1  | 0  | 0 | 0 | 0  | 0  | 0         | 0                | 1       |
| AT3G06470 | 0 | 0  | 0  | 0 | 0 | 0  | -1 | 0         | 0                | -1      |
| AT3G06500 | 0 | 0  | -1 | 0 | 0 | 0  | 0  | 0         | 0                | -1      |
| AT3G06610 | 0 | 0  | 0  | 0 | 0 | 0  | -1 | 0         | 0                | -1      |
| AT3G06720 | 0 | 0  | 0  | 0 | 0 | 0  | 1  | 0         | 0                | 1       |
| AT3G06730 | 0 | 0  | 0  | 0 | 0 | 0  | -1 | 0         | 0                | -1      |
| AT3G06750 | 0 | 0  | 0  | 0 | 0 | 0  | -1 | 0         | 0                | -1      |
| AT3G06760 | 0 | 0  | -1 | 0 | 0 | 0  | -1 | 0         | 0                | -1      |
| AT3G06770 | 1 | 1  | 1  | 0 | 0 | 0  | 0  | 0         | 0                | 1       |
| AT3G06860 | 0 | 0  | 0  | 0 | 0 | 0  | 1  | 0         | 0                | 1       |
| AT3G06930 | 0 | 0  | -1 | 0 | 0 | 0  | 0  | 0         | 0                | -1      |
| AT3G06950 | 0 | 0  | 0  | 0 | 0 | 0  | -1 | 0         | 0                | -1      |
| AT3G06960 | 0 | 0  | 0  | 0 | 0 | 0  | -1 | 0         | 0                | -1      |
| AT3G06990 | 1 | 1  | 0  | 0 | 0 | 0  | 0  | 0         | 0                | 1       |
| AT3G07000 | 1 | 1  | 0  | 0 | 0 | 1  | 0  | 0         | 1                | 1       |
| AT3G07010 | 1 | 1  | 0  | 0 | 0 | 0  | 1  | 0         | 0                | 1       |
| AT3G07110 | 0 | 0  | 0  | 0 | 0 | 0  | -1 | 0         | 0                | -1      |
| AT3G07200 | 0 | 0  | 0  | 0 | 0 | -1 | -1 | 0         | 0                | -1      |
| AT3G07210 | 0 | 1  | 0  | 0 | 0 | 0  | 0  | 0         | 0                | 1       |
| AT3G07215 | 0 | 0  | 0  | 0 | 0 | -1 | 0  | 0         | 0                | -1      |
| AT3G07270 | 0 | 0  | 0  | 0 | 0 | 0  | -1 | 0         | 0                | -1      |
| AT3G07300 | 0 | 0  | -1 | 0 | 0 | 0  | -1 | 0         | 0                | -1      |
| AT3G07320 | 0 | -1 | 0  | 0 | 0 | 0  | 0  | 0         | 0                | -1      |
| AT3G07350 | 0 | -1 | 0  | 0 | 0 | 0  | -1 | 0         | 0                | -1      |
| AT3G07410 | 0 | 0  | 0  | 0 | 0 | 0  | -1 | 0         | 0                | -1      |
| AT3G07430 | 0 | 0  | 0  | 0 | 0 | 0  | -1 | 0         | 0                | -1      |
| AT3G07470 | 1 | 1  | 0  | 0 | 0 | 0  | 1  | 0         | 0                | 1       |
| AT3G07520 | 0 | 0  | 0  | 0 | 0 | -1 | 0  | 0         | 0                | -1      |
| AT3G07540 | 0 | 0  | 1  | 0 | 0 | 1  | 0  | 0         | 0                | 1       |
| AT3G07580 | 0 | 0  | 0  | 0 | 0 | 1  | 0  | 0         | 0                | 1       |
| AT3G07660 | 0 | 0  | -1 | 0 | 0 | 0  | 0  | 0         | 0                | -1      |
| AT3G07730 | 0 | 0  | 0  | 0 | 0 | 1  | 0  | 0         | 0                | 1       |
| AT3G07800 | 0 | 0  | 0  | 0 | 0 | 0  | 1  | 0         | 0                | 1       |
| AT3G07850 | 0 | 0  | 0  | 1 | 0 | 0  | 0  | 0         | 0                | 1       |
| AT3G07940 | 0 | 0  | 0  | 0 | 0 | 0  | 1  | 0         | 0                | 1       |
| AT3G08000 | 0 | 0  | 0  | 0 | 0 | -1 | 0  | 0         | 0                | -1      |
| AT3G08010 | 0 | 0  | 0  | 0 | 0 | 0  | -1 | 0         | 0                | -1      |
| AT3G08030 | 0 | -1 | 0  | 0 | 0 | 0  | 0  | 0         | 0                | -1      |
| AT3G08500 | 0 | 0  | 0  | 0 | 0 | 1  | 0  | 0         | 0                | 1       |

Appendix Table S1

| Name      | 1  | 2  | 3  | 4 | 5 | 6  | 7  | bes1D_Col | bes1Dpif45_pif45 | ALL_BES |
|-----------|----|----|----|---|---|----|----|-----------|------------------|---------|
| AT3G08520 | 0  | 0  | 0  | 0 | 0 | 0  | -1 | 0         | 0                | -1      |
| AT3G08530 | 0  | 0  | 0  | 0 | 0 | 0  | 1  | 0         | 0                | 1       |
| AT3G08600 | 0  | 1  | 0  | 0 | 0 | 0  | 0  | 0         | 0                | 1       |
| AT3G08640 | -1 | -1 | 0  | 0 | 0 | 0  | 0  | 0         | 0                | -1      |
| AT3G08720 | 0  | 0  | 0  | 0 | 0 | 0  | 1  | 0         | 0                | 1       |
| AT3G08740 | 0  | 0  | 0  | 0 | 0 | 0  | -1 | 0         | 0                | -1      |
| AT3G08760 | 0  | -1 | 0  | 0 | 0 | 0  | 0  | 0         | 0                | -1      |
| AT3G08770 | -1 | -1 | 0  | 0 | 0 | 0  | 0  | 0         | 0                | -1      |
| AT3G08920 | 0  | 0  | 0  | 0 | 0 | 0  | -1 | 0         | 0                | -1      |
| AT3G08940 | 0  | 0  | 0  | 0 | 0 | 0  | -1 | 0         | 0                | -1      |
| AT3G09020 | 0  | 0  | 0  | 0 | 0 | 1  | 1  | 1         | 0                | 1       |
| AT3G09100 | 0  | 0  | 0  | 0 | 0 | 0  | 1  | 0         | 0                | 1       |
| AT3G09160 | 0  | 0  | 0  | 0 | 0 | 0  | -1 | 0         | 0                | -1      |
| AT3G09200 | 0  | 0  | 0  | 0 | 0 | 0  | -1 | 0         | 0                | -1      |
| AT3G09260 | 0  | 0  | 0  | 0 | 0 | 0  | 1  | 0         | 0                | 1       |
| AT3G09380 | 0  | 0  | 0  | 0 | 0 | 1  | 0  | 0         | 0                | 1       |
| AT3G09385 | 0  | 0  | 0  | 0 | 0 | 1  | 0  | 0         | 0                | 1       |
| AT3G09390 | 0  | 0  | 0  | 0 | 0 | 0  | -1 | 0         | 0                | -1      |
| AT3G09405 | 0  | 0  | 0  | 0 | 0 | 0  | 0  | 1         | 1                | 1       |
| AT3G09440 | 0  | 1  | 0  | 0 | 0 | 0  | 1  | 0         | 0                | 1       |
| AT3G09490 | 0  | 0  | 0  | 0 | 0 | 0  | 1  | 0         | 0                | 1       |
| AT3G09520 | 0  | 0  | 0  | 0 | 0 | 1  | 0  | 0         | 0                | 1       |
| AT3G09580 | 0  | 0  | 0  | 0 | 0 | 0  | -1 | 0         | 0                | -1      |
| AT3G09600 | 0  | 0  | 0  | 0 | 0 | 0  | -1 | 0         | 0                | -1      |
| AT3G09690 | 0  | 0  | -1 | 0 | 0 | 0  | 0  | 0         | 0                | -1      |
| AT3G09735 | 0  | 0  | 0  | 0 | 0 | 0  | -1 | 0         | 0                | -1      |
| AT3G09780 | 1  | 1  | 1  | 0 | 0 | 0  | 0  | 0         | 0                | 1       |
| AT3G09830 | 0  | 0  | 0  | 0 | 0 | 1  | 0  | 0         | 0                | 1       |
| AT3G09925 | 0  | 0  | 0  | 0 | 0 | 0  | 0  | 0         | -1               | -1      |
| AT3G09940 | 0  | 0  | 0  | 0 | 0 | 0  | 1  | 0         | 0                | 1       |
| AT3G09980 | 0  | 0  | 0  | 0 | 0 | 0  | 1  | 0         | 0                | 1       |
| AT3G10020 | 0  | -1 | 0  | 0 | 0 | 0  | 0  | 0         | 0                | -1      |
| AT3G10130 | 0  | 0  | 0  | 0 | 0 | 1  | 0  | 0         | 0                | 1       |
| AT3G10160 | 0  | 0  | -1 | 0 | 0 | 0  | 0  | 0         | 0                | -1      |
| AT3G10190 | 0  | 0  | 0  | 0 | 0 | 0  | -1 | 0         | 0                | -1      |
| AT3G10280 | 0  | 0  | 0  | 0 | 0 | 0  | -1 | 0         | 0                | -1      |
| AT3G10320 | 0  | 0  | 0  | 0 | 0 | 1  | 0  | 0         | 0                | 1       |
| AT3G10340 | 0  | 0  | 0  | 0 | 0 | 0  | 1  | 0         | 0                | 1       |
| AT3G10520 | -1 | -1 | 0  | 0 | 0 | 0  | 0  | 0         | 0                | -1      |
| AT3G10620 | 0  | 0  | -1 | 0 | 0 | 0  | 0  | 0         | 0                | -1      |
| AT3G10640 | 0  | 0  | 0  | 0 | 0 | 0  | 1  | 0         | 0                | 1       |
| AT3G10670 | 0  | 0  | 0  | 0 | 0 | 0  | -1 | 0         | 0                | -1      |
| AT3G10690 | 0  | 0  | -1 | 0 | 0 | 0  | 0  | 0         | 0                | -1      |
| AT3G10700 | 0  | 0  | 0  | 0 | 0 | 0  | -1 | 0         | 0                | -1      |
| AT3G10710 | 0  | 0  | 0  | 0 | 0 | -1 | 0  | 0         | 0                | -1      |
| AT3G10740 | 0  | 0  | 0  | 0 | 0 | 0  | 1  | 0         | 0                | 1       |
| AT3G10770 | 0  | 0  | 0  | 0 | 0 | 0  | -1 | 0         | 0                | -1      |
| AT3G10815 | 0  | 0  | 0  | 0 | 0 | 0  | 0  | 0         | 1                | 1       |
| AT3G10870 | 0  | 0  | 0  | 0 | 0 | 0  | -1 | 0         | 0                | -1      |
| AT3G10910 | 0  | 0  | 0  | 0 | 0 | 0  | 1  | 0         | 0                | 1       |
| AT3G10960 | 0  | 0  | 0  | 0 | 0 | 0  | 1  | 0         | 0                | 1       |
| AT3G11090 | 0  | -1 | 0  | 0 | 0 | 0  | 0  | 0         | 0                | -1      |
| AT3G11110 | -1 | -1 | 0  | 0 | 0 | 0  | 0  | 0         | 0                | -1      |
| AT3G11120 | 0  | 0  | 0  | 0 | 0 | 0  | -1 | 0         | 0                | -1      |
| AT3G11130 | 0  | 0  | 0  | 0 | 0 | 0  | 1  | 0         | 0                | 1       |
| AT3G11170 | 0  | 0  | 0  | 0 | 0 | 0  | -1 | 0         | 0                | -1      |
| AT3G11180 | 0  | 0  | 0  | 0 | 0 | 1  | 0  | 0         | 1                | 1       |
| AT3G11220 | 0  | 0  | 0  | 0 | 0 | -1 | 0  | 0         | 0                | -1      |
| AT3G11340 | 0  | 0  | 0  | 0 | 0 | 0  | 1  | 0         | 0                | 1       |
| AT3G11370 | 0  | 0  | 0  | 0 | 0 | -1 | 0  | 0         | 0                | -1      |
| AT3G11385 | 0  | 0  | 0  | 0 | 0 | -1 | 0  | 0         | 0                | -1      |

Appendix Table S1

| Name      | 1  | 2  | 3  | 4 | 5 | 6  | 7  | bes1D_Col | bes1Dpif45_pif45 | ALL_BES |
|-----------|----|----|----|---|---|----|----|-----------|------------------|---------|
| AT3G11410 | 0  | 0  | 0  | 0 | 0 | 0  | 0  | -1        | 0                | -1      |
| AT3G11420 | 0  | 0  | 0  | 0 | 0 | 0  | 1  | 0         | 0                | 1       |
| AT3G11430 | 0  | 0  | 0  | 0 | 0 | 0  | 0  | 1         | 1                | 1       |
| AT3G11500 | 0  | 0  | 0  | 0 | 0 | 0  | -1 | 0         | 0                | -1      |
| AT3G11520 | 0  | 0  | 0  | 0 | 0 | 1  | 1  | 0         | 0                | 1       |
| AT3G11550 | 0  | 0  | 0  | 0 | 0 | 1  | 1  | 0         | 0                | 1       |
| AT3G11630 | 0  | 0  | 0  | 0 | 0 | 0  | -1 | 0         | 0                | -1      |
| AT3G11690 | 0  | 0  | 0  | 0 | 0 | 0  | 1  | 0         | 0                | 1       |
| AT3G11700 | 1  | 1  | 1  | 0 | 0 | 0  | 1  | 0         | 0                | 1       |
| AT3G11720 | 0  | 0  | 0  | 0 | 0 | 1  | 0  | 0         | 0                | 1       |
| AT3G11760 | 0  | -1 | 0  | 0 | 0 | 0  | 0  | 0         | 0                | -1      |
| AT3G11770 | 0  | -1 | 0  | 0 | 0 | 0  | -1 | 0         | 0                | -1      |
| AT3G11780 | 0  | 0  | 0  | 0 | 0 | 0  | 1  | 0         | 0                | 1       |
| AT3G11830 | 0  | 0  | 0  | 0 | 0 | 0  | -1 | 0         | 0                | -1      |
| AT3G11940 | 0  | 0  | 0  | 0 | 0 | 0  | -1 | 0         | 0                | -1      |
| AT3G11950 | 0  | 0  | 0  | 0 | 0 | 0  | -1 | 0         | 0                | -1      |
| AT3G11964 | 0  | 0  | -1 | 0 | 0 | 0  | 0  | 0         | 0                | -1      |
| AT3G12010 | 0  | 0  | -1 | 0 | 0 | 0  | 0  | 0         | 0                | -1      |
| AT3G12040 | 0  | 0  | 0  | 0 | 0 | 1  | 1  | 0         | 0                | 1       |
| AT3G12110 | 1  | 1  | 0  | 0 | 0 | 0  | 1  | 0         | 0                | 1       |
| AT3G12203 | 0  | 0  | 0  | 0 | 0 | 1  | 0  | 0         | 0                | 1       |
| AT3G12220 | 0  | 0  | 0  | 0 | 0 | -1 | 0  | 0         | 0                | -1      |
| AT3G12290 | 0  | 0  | 0  | 0 | 0 | 0  | -1 | 0         | 0                | -1      |
| AT3G12360 | 0  | 0  | 0  | 0 | 0 | 0  | 1  | 0         | 0                | 1       |
| AT3G12500 | 0  | 0  | 0  | 0 | 0 | 1  | 0  | 0         | 0                | 1       |
| AT3G12560 | 0  | 0  | 0  | 0 | 0 | 0  | 1  | 0         | 0                | 1       |
| AT3G12580 | 1  | 0  | 0  | 0 | 0 | 0  | 0  | 0         | 0                | 1       |
| AT3G12610 | 1  | 1  | 0  | 0 | 0 | 1  | 1  | 0         | 0                | 1       |
| AT3G12700 | 0  | 0  | 0  | 0 | 0 | 1  | 0  | 0         | 0                | 1       |
| AT3G12740 | 0  | 0  | 0  | 0 | 0 | 0  | 1  | 0         | 0                | 1       |
| AT3G12780 | 0  | 0  | 0  | 0 | 0 | 0  | -1 | 0         | 0                | -1      |
| AT3G12830 | 0  | 0  | 0  | 0 | 0 | 0  | -1 | 0         | 0                | -1      |
| AT3G12910 | 0  | 0  | 0  | 0 | 0 | 0  | 0  | 1         | 1                | 1       |
| AT3G12920 | -1 | -1 | -1 | 0 | 0 | 0  | 0  | 0         | 0                | -1      |
| AT3G12930 | 0  | 0  | 0  | 0 | 0 | 0  | -1 | 0         | 0                | -1      |
| AT3G13040 | 0  | 0  | -1 | 0 | 0 | 0  | 0  | 0         | 0                | -1      |
| AT3G13100 | 0  | 0  | 0  | 0 | 0 | 0  | 0  | 1         | 0                | 1       |
| AT3G13110 | 0  | 0  | 0  | 0 | 0 | 1  | 0  | 0         | 0                | 1       |
| AT3G13120 | 0  | 0  | 0  | 0 | 0 | 0  | -1 | 0         | 0                | -1      |
| AT3G13130 | 0  | 0  | 0  | 0 | 0 | 1  | 0  | 0         | 0                | 1       |
| AT3G13150 | 0  | 0  | -1 | 0 | 0 | 0  | 0  | 0         | 0                | -1      |
| AT3G13175 | 0  | 0  | 0  | 0 | 0 | 0  | -1 | 0         | 0                | -1      |
| AT3G13230 | 0  | 0  | 0  | 0 | 0 | 0  | -1 | 0         | 0                | -1      |
| AT3G13240 | 0  | 0  | 0  | 0 | 0 | -1 | 0  | 0         | 0                | -1      |
| AT3G13270 | 0  | 0  | 0  | 0 | 0 | -1 | 0  | 0         | 0                | -1      |
| AT3G13320 | 0  | 0  | 0  | 0 | 0 | 0  | 1  | 0         | 0                | 1       |
| AT3G13380 | 0  | -1 | 0  | 0 | 0 | 0  | 0  | 0         | 0                | -1      |
| AT3G13400 | 0  | 0  | 0  | 0 | 0 | -1 | 0  | 0         | 0                | -1      |
| AT3G13432 | 0  | 0  | 0  | 0 | 0 | 1  | 0  | 0         | 0                | 1       |
| AT3G13435 | 0  | 0  | 0  | 0 | 0 | 1  | 0  | 0         | 0                | 1       |
| AT3G13437 | 0  | 0  | 0  | 0 | 0 | 1  | 0  | 1         | 0                | 1       |
| AT3G13510 | -1 | -1 | 0  | 0 | 0 | 0  | 0  | 0         | 0                | -1      |
| AT3G13520 | 0  | 1  | 0  | 0 | 0 | 1  | 0  | 0         | 0                | 1       |
| AT3G13650 | 0  | 1  | 0  | 0 | 0 | 1  | 1  | 1         | 0                | 1       |
| AT3G13674 | 0  | 0  | 0  | 0 | 0 | 0  | -1 | 0         | 0                | -1      |
| AT3G13690 | 0  | 0  | 0  | 0 | 0 | 0  | 1  | 0         | 0                | 1       |
| AT3G13730 | -1 | -1 | -1 | 0 | 0 | -1 | 0  | -1        | -1               | -1      |
| AT3G13750 | 0  | 0  | 0  | 0 | 0 | 0  | 1  | 0         | 0                | 1       |
| AT3G13790 | 0  | 0  | 0  | 0 | 0 | 0  | 1  | 0         | 0                | 1       |
| AT3G13930 | 0  | 0  | 0  | 0 | 0 | 0  | 1  | 0         | 0                | 1       |
| AT3G14050 | 0  | 0  | 0  | 0 | 0 | 0  | 1  | 0         | 0                | 1       |

Appendix Table S1

| Name      | 1  | 2  | 3  | 4 | 5 | 6  | 7  | bes1D_Col | bes1Dpif45_pif45 | ALL_BES |
|-----------|----|----|----|---|---|----|----|-----------|------------------|---------|
| AT3G14067 | 0  | 0  | 0  | 0 | 0 | 0  | 1  | 0         | 0                | 1       |
| AT3G14110 | 0  | 0  | 0  | 0 | 0 | 0  | -1 | 0         | 0                | -1      |
| AT3G14190 | 0  | 0  | 0  | 0 | 0 | 1  | 0  | 0         | 0                | 1       |
| AT3G14225 | 0  | 0  | 0  | 0 | 0 | 0  | 0  | 1         | 0                | 1       |
| AT3G14230 | 0  | -1 | 0  | 0 | 0 | 0  | 0  | 0         | 0                | -1      |
| AT3G14270 | 0  | 1  | 0  | 0 | 0 | 1  | 1  | 0         | 0                | 1       |
| AT3G14310 | 0  | 0  | 0  | 0 | 0 | 0  | 1  | 0         | 0                | 1       |
| AT3G14330 | 0  | 0  | 0  | 0 | 0 | 0  | 0  | -1        | 0                | -1      |
| AT3G14350 | 0  | 0  | 0  | 0 | 0 | 0  | -1 | 0         | 0                | -1      |
| AT3G14370 | 1  | 1  | 1  | 0 | 0 | 1  | 1  | 0         | 0                | 1       |
| AT3G14380 | 0  | 0  | 1  | 0 | 0 | 1  | 0  | 1         | 1                | 1       |
| AT3G14440 | 0  | 0  | 0  | 0 | 0 | 1  | 0  | 0         | 0                | 1       |
| AT3G14450 | 0  | 0  | 0  | 0 | 0 | 0  | -1 | 0         | 0                | -1      |
| AT3G14560 | -1 | 0  | 0  | 0 | 0 | 0  | 0  | 0         | 0                | -1      |
| AT3G14580 | 0  | 0  | 0  | 0 | 0 | -1 | 0  | 0         | 0                | -1      |
| AT3G14620 | 0  | 0  | 0  | 0 | 0 | -1 | 0  | 0         | 0                | -1      |
| AT3G14640 | 0  | 0  | 0  | 0 | 0 | 1  | 0  | 0         | 0                | 1       |
| AT3G14770 | 0  | 0  | 0  | 0 | 0 | 1  | 0  | 0         | 0                | 1       |
| AT3G14840 | 0  | 0  | 0  | 0 | 0 | 0  | 1  | 0         | 0                | 1       |
| AT3G14920 | 0  | 0  | 0  | 0 | 0 | 0  | 1  | 0         | 0                | 1       |
| AT3G14930 | 0  | 0  | 0  | 0 | 0 | 0  | -1 | 0         | 0                | -1      |
| AT3G15030 | 0  | 0  | 0  | 0 | 0 | 0  | -1 | 0         | 0                | -1      |
| AT3G15070 | 0  | 0  | -1 | 0 | 0 | 0  | 0  | 0         | 0                | -1      |
| AT3G15095 | -1 | -1 | -1 | 0 | 0 | 0  | 0  | 0         | 0                | -1      |
| AT3G15115 | 0  | 0  | 0  | 0 | 0 | 1  | 0  | 0         | 0                | 1       |
| AT3G15190 | 0  | 0  | 0  | 0 | 0 | 0  | -1 | 0         | 0                | -1      |
| AT3G15240 | -1 | -1 | 0  | 0 | 0 | -1 | 0  | 0         | 0                | -1      |
| AT3G15356 | 0  | 0  | 0  | 0 | 0 | 1  | 0  | 0         | 1                | 1       |
| AT3G15357 | 0  | 0  | 0  | 0 | 0 | -1 | 0  | 0         | 0                | -1      |
| AT3G15360 | 0  | 0  | 0  | 0 | 0 | 0  | -1 | 0         | 0                | -1      |
| AT3G15370 | 0  | 0  | 0  | 0 | 0 | -1 | -1 | 0         | 0                | -1      |
| AT3G15380 | 0  | 0  | 0  | 0 | 0 | 0  | -1 | 0         | 0                | -1      |
| AT3G15518 | 0  | 0  | 0  | 0 | 0 | 1  | 0  | 0         | 0                | 1       |
| AT3G15520 | 0  | 0  | 0  | 0 | 0 | 0  | -1 | 0         | 0                | -1      |
| AT3G15530 | 0  | 0  | 1  | 0 | 0 | 0  | 0  | 0         | 0                | 1       |
| AT3G15540 | 0  | 1  | 0  | 1 | 0 | 1  | 1  | 0         | 1                | 1       |
| AT3G15550 | 0  | 0  | 0  | 0 | 0 | 1  | 0  | 0         | 0                | 1       |
| AT3G15670 | 0  | 0  | 0  | 0 | 0 | -1 | 0  | -1        | 0                | -1      |
| AT3G15680 | -1 | -1 | 0  | 0 | 0 | 0  | 0  | 0         | 0                | -1      |
| AT3G15730 | 0  | 0  | 0  | 0 | 0 | 0  | 0  | 0         | -1               | -1      |
| AT3G15760 | 0  | 0  | 0  | 0 | 0 | 0  | -1 | 0         | 0                | -1      |
| AT3G15780 | 0  | 0  | 0  | 0 | 0 | 0  | -1 | 0         | 0                | -1      |
| AT3G15840 | 0  | 0  | 0  | 0 | 0 | 0  | -1 | 0         | 0                | -1      |
| AT3G15850 | 0  | 0  | 0  | 0 | 0 | 0  | -1 | 0         | 0                | -1      |
| AT3G15990 | 0  | 0  | 0  | 0 | 0 | -1 | 0  | 0         | 0                | -1      |
| AT3G16140 | 0  | 0  | 0  | 0 | 0 | 0  | -1 | 0         | 0                | -1      |
| AT3G16150 | 0  | 0  | 0  | 0 | 0 | 1  | 0  | 0         | 1                | 1       |
| AT3G16175 | 0  | 0  | 0  | 0 | 0 | 1  | 0  | 0         | 0                | 1       |
| AT3G16210 | 0  | 0  | 0  | 0 | 0 | 1  | 0  | 0         | 0                | 1       |
| AT3G16240 | 0  | 0  | 0  | 0 | 0 | 1  | 0  | 0         | 0                | 1       |
| AT3G16250 | 0  | 0  | 0  | 0 | 0 | 0  | 0  | -1        | 0                | -1      |
| AT3G16280 | 0  | 0  | 0  | 0 | 0 | 1  | 0  | 0         | 0                | 1       |
| AT3G16340 | 0  | 0  | 0  | 0 | 0 | 0  | 1  | 0         | 0                | 1       |
| AT3G16370 | 0  | 1  | 0  | 1 | 0 | 1  | 1  | 0         | 0                | 1       |
| AT3G16380 | 0  | 0  | 0  | 0 | 0 | -1 | 0  | 0         | 0                | -1      |
| AT3G16390 | 0  | 0  | 0  | 0 | 0 | 0  | 1  | 0         | 0                | 1       |
| AT3G16400 | 0  | 0  | 0  | 0 | 0 | 0  | 1  | 0         | 0                | 1       |
| AT3G16410 | 0  | 0  | 0  | 0 | 0 | 0  | 1  | 0         | 0                | 1       |
| AT3G16420 | 0  | 0  | 0  | 0 | 0 | 0  | 1  | 0         | 0                | 1       |
| AT3G16450 | 0  | 0  | 0  | 0 | 0 | 0  | 0  | -1        | -1               | -1      |
| AT3G16460 | 0  | 0  | 0  | 0 | 0 | 0  | 1  | 0         | 0                | 1       |

Appendix Table S1

| Name      | 1  | 2  | 3  | 4  | 5 | 6  | 7  | bes1D_Col | bes1Dpif45_pif45 | ALL_BES |
|-----------|----|----|----|----|---|----|----|-----------|------------------|---------|
| AT3G16470 | 0  | 0  | 0  | 0  | 0 | 0  | 1  | 0         | 0                | 1       |
| AT3G16500 | -1 | -1 | -1 | -1 | 0 | 0  | 0  | 0         | 0                | -1      |
| AT3G16520 | 0  | 0  | 0  | 0  | 0 | 0  | -1 | 0         | 0                | -1      |
| AT3G16530 | 0  | 0  | 0  | 0  | 0 | 1  | 0  | 1         | 1                | 1       |
| AT3G16560 | 0  | 0  | 0  | 0  | 0 | 0  | -1 | 0         | 0                | -1      |
| AT3G16570 | -1 | -1 | 0  | 0  | 0 | -1 | -1 | 0         | 0                | -1      |
| AT3G16620 | 0  | 0  | -1 | 0  | 0 | 0  | 0  | 0         | 0                | -1      |
| AT3G16670 | 0  | 0  | 0  | 0  | 0 | -1 | -1 | 0         | 0                | -1      |
| AT3G16700 | 1  | 1  | 0  | 0  | 0 | 0  | 0  | 0         | 0                | 1       |
| AT3G16740 | 0  | 0  | 0  | 0  | 0 | -1 | 0  | 0         | 0                | -1      |
| AT3G16750 | 0  | 0  | 0  | 0  | 0 | -1 | 0  | 0         | 0                | -1      |
| AT3G16770 | 0  | 0  | 0  | 0  | 0 | 0  | 1  | 0         | 0                | 1       |
| AT3G16830 | 0  | 0  | -1 | 0  | 0 | 0  | 0  | 0         | 0                | -1      |
| AT3G16850 | 0  | 0  | 0  | 0  | 0 | 0  | 1  | 0         | 0                | 1       |
| AT3G16920 | 0  | 0  | 0  | 0  | 0 | 1  | 0  | 0         | 0                | 1       |
| AT3G17050 | 0  | 0  | 0  | 0  | 0 | 1  | 0  | 0         | 0                | 1       |
| AT3G17110 | 0  | 0  | 0  | 0  | 0 | 1  | 0  | 0         | 0                | 1       |
| AT3G17170 | 0  | 0  | 0  | 0  | 0 | 0  | 0  | -1        | 0                | -1      |
| AT3G17240 | 0  | 0  | 0  | 0  | 0 | 0  | 1  | 0         | 0                | 1       |
| AT3G17310 | 0  | 0  | 0  | 0  | 0 | 0  | -1 | 0         | 0                | -1      |
| AT3G17350 | 0  | 0  | 0  | 0  | 0 | 0  | -1 | 0         | 0                | -1      |
| AT3G17365 | 0  | -1 | 0  | 0  | 0 | 0  | 0  | 0         | 0                | -1      |
| AT3G17380 | 0  | 0  | 0  | 0  | 0 | 0  | 1  | 0         | 0                | 1       |
| AT3G17390 | 0  | 0  | 0  | 0  | 0 | 0  | 1  | 0         | 0                | 1       |
| AT3G17420 | 0  | 0  | 0  | 0  | 0 | 1  | 1  | 0         | 0                | 1       |
| AT3G17465 | 0  | 0  | 0  | 0  | 0 | 0  | -1 | 0         | 0                | -1      |
| AT3G17510 | 0  | 0  | 0  | 0  | 0 | 0  | 1  | 0         | 0                | 1       |
| AT3G17520 | 0  | 0  | 0  | 0  | 0 | -1 | 0  | -1        | 0                | -1      |
| AT3G17580 | 0  | 0  | 0  | 0  | 0 | 1  | 0  | 0         | 0                | 1       |
| AT3G17590 | 0  | 0  | 0  | 0  | 0 | 0  | -1 | 0         | 0                | -1      |
| AT3G17640 | 0  | 0  | 0  | 0  | 0 | 1  | 0  | 0         | 0                | 1       |
| AT3G17790 | 0  | 0  | 0  | 0  | 0 | 1  | 0  | 0         | 0                | 1       |
| AT3G17800 | 0  | -1 | -1 | 0  | 0 | 0  | 0  | 0         | 0                | -1      |
| AT3G17810 | 0  | 0  | 0  | 0  | 0 | 0  | 1  | 0         | 0                | 1       |
| AT3G17850 | 0  | 0  | 0  | 0  | 0 | 0  | 1  | 0         | 0                | 1       |
| AT3G17860 | -1 | -1 | 0  | 0  | 0 | 0  | 0  | 0         | 0                | -1      |
| AT3G17950 | 0  | 0  | 0  | 0  | 0 | 0  | -1 | 0         | 0                | -1      |
| AT3G17980 | 0  | 0  | 0  | 0  | 0 | 1  | 0  | 0         | 0                | 1       |
| AT3G18030 | 0  | 0  | 0  | 0  | 0 | 0  | -1 | 0         | 0                | -1      |
| AT3G18050 | 0  | 0  | 0  | 0  | 0 | 0  | -1 | 0         | 0                | -1      |
| AT3G18080 | -1 | 0  | 0  | 0  | 0 | 0  | 0  | 0         | 0                | -1      |
| AT3G18200 | 1  | 1  | 1  | 0  | 0 | 1  | 1  | 0         | 0                | 1       |
| AT3G18217 | 0  | 0  | 0  | 0  | 0 | 1  | 0  | 0         | 0                | 1       |
| AT3G18250 | 0  | 0  | 0  | 0  | 0 | 0  | 0  | 0         | 1                | 1       |
| AT3G18270 | 0  | 0  | 0  | 0  | 0 | 0  | -1 | 0         | 0                | -1      |
| AT3G18280 | 0  | 0  | 0  | 0  | 0 | -1 | 0  | -1        | 0                | -1      |
| AT3G18320 | 0  | 0  | 0  | 0  | 0 | -1 | 0  | 0         | 0                | -1      |
| AT3G18420 | 0  | 0  | 0  | 0  | 0 | 0  | -1 | 0         | 0                | -1      |
| AT3G18520 | 0  | 0  | 0  | 0  | 0 | -1 | -1 | 0         | 0                | -1      |
| AT3G18530 | 0  | 0  | 0  | 0  | 0 | -1 | -1 | 0         | 0                | -1      |
| AT3G18680 | 0  | 0  | 0  | 0  | 0 | 0  | -1 | 0         | 0                | -1      |
| AT3G18710 | 0  | 0  | -1 | 0  | 0 | 0  | 0  | 0         | 0                | -1      |
| AT3G18750 | 0  | 0  | 0  | 0  | 0 | 0  | 0  | -1        | 0                | -1      |
| AT3G18800 | 0  | 0  | 0  | 0  | 0 | 0  | -1 | 0         | 0                | -1      |
| AT3G18820 | 0  | 0  | 0  | 0  | 0 | 0  | 1  | 0         | 0                | 1       |
| AT3G18830 | 0  | 1  | 0  | 0  | 0 | 1  | 1  | 0         | 0                | 1       |
| AT3G18960 | 0  | 0  | 0  | 0  | 0 | 0  | -1 | 0         | 0                | -1      |
| AT3G18990 | 0  | 0  | 0  | 0  | 0 | 0  | 1  | 0         | 0                | 1       |
| AT3G19000 | 0  | 0  | -1 | 0  | 0 | 0  | 0  | 0         | 0                | -1      |
| AT3G19220 | 0  | 0  | 0  | 0  | 0 | 0  | -1 | 0         | 0                | -1      |
| AT3G19360 | 0  | 0  | 0  | 0  | 0 | 0  | -1 | 0         | 0                | -1      |

Appendix Table S1

| Name      | 1  | 2  | 3  | 4 | 5 | 6  | 7  | bes1D_Col | bes1Dpif45_pif45 | ALL_BES |
|-----------|----|----|----|---|---|----|----|-----------|------------------|---------|
| AT3G19380 | -1 | -1 | 0  | 0 | 0 | 0  | 0  | 0         | 0                | -1      |
| AT3G19390 | 0  | 0  | 0  | 0 | 0 | 0  | 1  | 0         | 0                | 1       |
| AT3G19400 | 0  | 0  | 0  | 0 | 0 | 0  | 1  | 0         | 0                | 1       |
| AT3G19450 | 0  | 0  | 0  | 0 | 0 | 0  | 1  | 0         | 0                | 1       |
| AT3G19480 | 0  | 0  | 0  | 0 | 0 | 0  | 0  | -1        | 0                | -1      |
| AT3G19490 | 0  | 0  | 0  | 0 | 0 | 0  | -1 | 0         | 0                | -1      |
| AT3G19515 | 0  | 0  | 0  | 0 | 0 | -1 | 0  | 0         | 0                | -1      |
| AT3G19553 | 0  | 1  | 0  | 0 | 0 | 0  | 1  | 0         | 0                | 1       |
| AT3G19580 | 0  | 0  | 0  | 0 | 0 | 1  | 1  | 0         | 0                | 1       |
| AT3G19615 | 0  | 0  | 0  | 0 | 0 | 0  | 0  | 1         | 0                | 1       |
| AT3G19620 | 0  | 0  | 0  | 0 | 0 | 1  | 0  | 0         | 0                | 1       |
| AT3G19680 | 0  | 0  | -1 | 0 | 0 | 0  | 0  | 0         | 0                | -1      |
| AT3G19760 | 0  | 0  | 0  | 0 | 0 | 0  | 1  | 0         | 0                | 1       |
| AT3G19800 | 0  | 0  | 0  | 0 | 0 | 0  | -1 | 0         | 0                | -1      |
| AT3G19860 | 0  | 0  | 0  | 0 | 0 | -1 | 0  | 0         | 0                | -1      |
| AT3G19900 | 0  | 0  | 0  | 0 | 0 | 0  | 1  | 0         | 0                | 1       |
| AT3G19930 | 0  | 0  | 0  | 1 | 0 | 0  | 0  | 0         | 0                | 1       |
| AT3G19970 | 0  | 0  | 0  | 0 | 0 | 0  | -1 | 0         | 0                | -1      |
| AT3G20000 | 0  | 0  | 0  | 0 | 0 | 0  | -1 | 0         | 0                | -1      |
| AT3G20130 | 0  | 0  | 0  | 0 | 0 | 0  | 1  | 0         | 0                | 1       |
| AT3G20210 | 0  | 0  | 0  | 0 | 0 | -1 | 0  | 0         | 0                | -1      |
| AT3G20240 | 0  | 0  | 0  | 0 | 0 | 0  | -1 | 0         | 0                | -1      |
| AT3G20300 | 0  | 0  | 1  | 0 | 0 | 0  | 0  | 0         | 0                | 1       |
| AT3G20410 | 0  | 0  | 0  | 0 | 0 | 0  | 1  | 0         | 0                | 1       |
| AT3G20450 | 0  | 0  | 0  | 0 | 0 | 0  | 1  | 0         | 0                | 1       |
| AT3G20460 | 0  | 0  | 0  | 0 | 0 | 1  | 1  | 0         | 1                | 1       |
| AT3G20480 | 0  | 0  | 0  | 0 | 0 | 1  | 0  | 0         | 0                | 1       |
| AT3G20500 | 0  | 0  | -1 | 0 | 0 | 0  | 0  | 0         | 0                | -1      |
| AT3G20510 | 0  | 0  | 0  | 0 | 0 | 1  | 0  | 0         | 0                | 1       |
| AT3G20570 | 0  | 0  | 0  | 0 | 0 | 0  | 1  | 0         | 0                | 1       |
| AT3G20620 | 0  | 0  | 0  | 0 | 0 | 0  | 1  | 0         | 0                | 1       |
| AT3G20660 | 0  | 0  | 0  | 0 | 0 | 0  | 1  | 0         | 0                | 1       |
| AT3G20680 | 0  | 0  | 0  | 0 | 0 | 0  | -1 | 0         | 0                | -1      |
| AT3G20705 | 0  | 0  | 0  | 0 | 0 | 0  | 0  | 0         | -1               | -1      |
| AT3G20830 | -1 | -1 | 0  | 0 | 0 | 0  | 0  | 0         | 0                | -1      |
| AT3G20840 | 0  | 0  | 0  | 0 | 0 | -1 | 0  | 0         | 0                | -1      |
| AT3G20935 | 0  | 0  | 0  | 0 | 0 | 1  | 0  | 0         | 0                | 1       |
| AT3G20950 | 0  | 0  | 0  | 0 | 0 | 1  | 0  | 0         | 0                | 1       |
| AT3G21010 | 0  | 0  | 0  | 0 | 0 | -1 | 0  | 0         | 0                | -1      |
| AT3G21030 | 0  | 0  | 0  | 0 | 0 | -1 | 0  | 0         | 0                | -1      |
| AT3G21055 | 0  | 0  | 0  | 0 | 0 | 0  | -1 | 0         | 0                | -1      |
| AT3G21080 | 0  | 0  | 0  | 0 | 0 | 0  | 0  | 1         | 1                | 1       |
| AT3G21180 | 0  | 0  | 0  | 0 | 0 | -1 | 0  | 0         | 0                | -1      |
| AT3G21190 | 0  | 1  | 0  | 0 | 0 | 0  | 1  | 0         | 0                | 1       |
| AT3G21240 | 0  | 0  | 0  | 0 | 0 | 0  | 1  | 0         | 0                | 1       |
| AT3G21280 | 0  | 0  | 0  | 0 | 0 | 0  | -1 | 0         | 0                | -1      |
| AT3G21300 | 0  | 0  | 0  | 0 | 0 | 0  | -1 | 0         | 0                | -1      |
| AT3G21350 | 0  | 0  | 0  | 0 | 0 | 0  | -1 | 0         | 0                | -1      |
| AT3G21352 | 0  | 0  | 0  | 0 | 0 | 1  | 0  | 0         | 0                | 1       |
| AT3G21360 | 0  | 0  | 0  | 0 | 0 | 0  | -1 | 0         | 0                | -1      |
| AT3G21390 | 0  | 0  | 0  | 0 | 0 | 0  | -1 | 0         | 0                | -1      |
| AT3G21420 | 0  | 1  | 0  | 0 | 0 | 0  | 0  | 0         | 0                | 1       |
| AT3G21460 | 0  | 0  | 0  | 0 | 0 | 1  | 0  | 0         | 0                | 1       |
| AT3G21520 | 0  | 0  | 0  | 0 | 0 | 0  | 0  | 1         | 0                | 1       |
| AT3G21650 | 0  | 0  | 0  | 0 | 0 | 0  | -1 | 0         | 0                | -1      |
| AT3G21660 | 0  | 0  | 0  | 0 | 0 | 1  | 0  | 0         | 0                | 1       |
| AT3G21670 | 0  | 0  | 0  | 0 | 0 | 0  | 0  | -1        | 0                | -1      |
| AT3G21770 | 0  | 0  | 0  | 0 | 0 | 0  | 1  | 0         | 0                | 1       |
| AT3G21865 | 0  | -1 | 0  | 0 | 0 | 0  | 0  | 0         | 0                | -1      |
| AT3G21870 | 0  | -1 | -1 | 0 | 0 | 0  | 0  | 0         | 0                | -1      |
| AT3G21890 | 0  | 0  | 0  | 0 | 0 | 0  | 0  | -1        | 0                | -1      |





Appendix Table S1

| Name      | 1 | 2  | 3  | 4  | 5 | 6  | 7  | bes1D_Col | bes1Dpif45_pif45 | ALL_BES |
|-----------|---|----|----|----|---|----|----|-----------|------------------|---------|
| AT3G24570 | 0 | 0  | 0  | 0  | 0 | 0  | -1 | 0         | 0                | -1      |
| AT3G24715 | 0 | 0  | 0  | 0  | 0 | 1  | 0  | 0         | 0                | 1       |
| AT3G24830 | 0 | 0  | 0  | 0  | 0 | 0  | -1 | 0         | 0                | -1      |
| AT3G25110 | 0 | 0  | 0  | 1  | 0 | 0  | 0  | 0         | 0                | 1       |
| AT3G25290 | 0 | 0  | 0  | 0  | 0 | 1  | 1  | 0         | 0                | 1       |
| AT3G25410 | 0 | 0  | 0  | 0  | 0 | 0  | -1 | 0         | 0                | -1      |
| AT3G25480 | 0 | 0  | 0  | 0  | 0 | 0  | -1 | 0         | 0                | -1      |
| AT3G25585 | 0 | 0  | 0  | 0  | 0 | 0  | 1  | 0         | 0                | 1       |
| AT3G25600 | 0 | 1  | 0  | 0  | 0 | 0  | 0  | 0         | 0                | 1       |
| AT3G25660 | 0 | 0  | 0  | 0  | 0 | 0  | -1 | 0         | 0                | -1      |
| AT3G25670 | 0 | 0  | 0  | 0  | 0 | 0  | -1 | 0         | 0                | -1      |
| AT3G25780 | 0 | 0  | 0  | 0  | 0 | 0  | 1  | 0         | 0                | 1       |
| AT3G25805 | 0 | 0  | 0  | 0  | 0 | 0  | -1 | 0         | 0                | -1      |
| AT3G25830 | 0 | 0  | 0  | 0  | 0 | 0  | 0  | -1        | 0                | -1      |
| AT3G25855 | 0 | 0  | 0  | 0  | 0 | 0  | 0  | 0         | 1                | 1       |
| AT3G25860 | 0 | 0  | 0  | 0  | 0 | 0  | -1 | 0         | 0                | -1      |
| AT3G25890 | 0 | 0  | 0  | 0  | 0 | 0  | -1 | 0         | 0                | -1      |
| AT3G25900 | 1 | 1  | 0  | 0  | 0 | 0  | 1  | 0         | 1                | 1       |
| AT3G25920 | 0 | 0  | 0  | 0  | 0 | 0  | -1 | 0         | 0                | -1      |
| AT3G25930 | 0 | 0  | 0  | 0  | 0 | 0  | 1  | 0         | 0                | 1       |
| AT3G25940 | 0 | 0  | 0  | 0  | 0 | 0  | -1 | 0         | 0                | -1      |
| AT3G25980 | 0 | 0  | 0  | 0  | 0 | 1  | 1  | 0         | 0                | 1       |
| AT3G26020 | 0 | 0  | 0  | 0  | 0 | 0  | 1  | 0         | 0                | 1       |
| AT3G26060 | 0 | 0  | 0  | 0  | 0 | 0  | -1 | 0         | 0                | -1      |
| AT3G26085 | 0 | 0  | -1 | 0  | 0 | 0  | 0  | 0         | 0                | -1      |
| AT3G26120 | 0 | 0  | 0  | 0  | 0 | -1 | 0  | 0         | 0                | -1      |
| AT3G26170 | 0 | 0  | 0  | 0  | 0 | 1  | 1  | 0         | 0                | 1       |
| AT3G26180 | 0 | 0  | 0  | 0  | 0 | 1  | 1  | 0         | 1                | 1       |
| AT3G26200 | 0 | -1 | 0  | 0  | 0 | 0  | 0  | 0         | 0                | -1      |
| AT3G26210 | 0 | 0  | 0  | 0  | 0 | 0  | 0  | 0         | 1                | 1       |
| AT3G26220 | 0 | 0  | 0  | -1 | 0 | 0  | 0  | 0         | 0                | -1      |
| AT3G26230 | 0 | 0  | 0  | 0  | 0 | 0  | 0  | 1         | 1                | 1       |
| AT3G26330 | 0 | 0  | 0  | 0  | 0 | 0  | 1  | 0         | 0                | 1       |
| AT3G26410 | 0 | 0  | 0  | 0  | 0 | 0  | -1 | 0         | 0                | -1      |
| AT3G26440 | 0 | 0  | 0  | 0  | 0 | 0  | 1  | 0         | 0                | 1       |
| AT3G26445 | 0 | 0  | 0  | 0  | 0 | 1  | 0  | 0         | 0                | 1       |
| AT3G26450 | 0 | 0  | 0  | 0  | 0 | 0  | 1  | 0         | 0                | 1       |
| AT3G26490 | 0 | 1  | 0  | 0  | 0 | 0  | 0  | 0         | 0                | 1       |
| AT3G26500 | 0 | 0  | 0  | 0  | 0 | 1  | 0  | 0         | 0                | 1       |
| AT3G26525 | 0 | 0  | 0  | 0  | 0 | 1  | 0  | 0         | 0                | 1       |
| AT3G26530 | 0 | 0  | 0  | 0  | 0 | 1  | 0  | 0         | 0                | 1       |
| AT3G26570 | 0 | 0  | 0  | 0  | 0 | 0  | -1 | -1        | 0                | -1      |
| AT3G26590 | 0 | 0  | 0  | 0  | 0 | 0  | 1  | 0         | 1                | 1       |
| AT3G26610 | 0 | 0  | 0  | 0  | 0 | -1 | 0  | 0         | 0                | -1      |
| AT3G26640 | 0 | 0  | 0  | 0  | 0 | 0  | -1 | 0         | 0                | -1      |
| AT3G26650 | 0 | 0  | 0  | 0  | 0 | 0  | -1 | 0         | 0                | -1      |
| AT3G26670 | 0 | 0  | 0  | 0  | 0 | 0  | 1  | 0         | 0                | 1       |
| AT3G26690 | 0 | 0  | 0  | 0  | 0 | 0  | -1 | 0         | 0                | -1      |
| AT3G26710 | 0 | 0  | 0  | 0  | 0 | 0  | -1 | 0         | 0                | -1      |
| AT3G26720 | 0 | 0  | 0  | 0  | 0 | 0  | 1  | 0         | 0                | 1       |
| AT3G26730 | 0 | 0  | 0  | 0  | 0 | 0  | 1  | 0         | 0                | 1       |
| AT3G26815 | 0 | 0  | 0  | 0  | 0 | 1  | 0  | 0         | 0                | 1       |
| AT3G26830 | 0 | 0  | 0  | 0  | 0 | 0  | 0  | 1         | 1                | 1       |
| AT3G26900 | 0 | 0  | 0  | 0  | 0 | 0  | -1 | 0         | 0                | -1      |
| AT3G26935 | 0 | 0  | 0  | 0  | 0 | 0  | 1  | 0         | 0                | 1       |
| AT3G26980 | 0 | 1  | 0  | 0  | 0 | 0  | 0  | 0         | 0                | 1       |
| AT3G27060 | 0 | 0  | 0  | 0  | 0 | 0  | 1  | 0         | 0                | 1       |
| AT3G27110 | 0 | 0  | -1 | 0  | 0 | 0  | 0  | 0         | 0                | -1      |
| AT3G27160 | 0 | 0  | 0  | 0  | 0 | 0  | -1 | 0         | 0                | -1      |
| AT3G27190 | 0 | 0  | 0  | 0  | 0 | 0  | 1  | 0         | 0                | 1       |
| AT3G27210 | 0 | 0  | 0  | 0  | 0 | 0  | 1  | 0         | 0                | 1       |

Appendix Table S1

| Name      | 1  | 2  | 3  | 4  | 5  | 6  | 7  | bes1D_Col | bes1Dpif45_pif45 | ALL_BES |
|-----------|----|----|----|----|----|----|----|-----------|------------------|---------|
| AT3G27220 | 0  | 0  | -1 | 0  | 0  | 0  | 0  | 0         | 0                | -1      |
| AT3G27325 | 0  | 0  | 0  | 0  | 0  | 0  | 1  | 0         | 0                | 1       |
| AT3G27390 | 0  | 0  | 0  | 0  | 0  | 0  | 1  | 0         | 0                | 1       |
| AT3G27470 | 0  | 0  | 0  | 0  | 0  | 0  | 1  | 0         | 0                | 1       |
| AT3G27500 | 0  | 0  | 0  | 0  | 0  | 1  | 0  | 1         | 1                | 1       |
| AT3G27530 | 0  | 0  | -1 | 0  | 0  | 0  | 0  | 0         | 0                | -1      |
| AT3G27660 | 0  | 0  | 0  | 0  | 0  | -1 | 0  | 0         | 0                | -1      |
| AT3G27690 | 0  | 0  | 0  | -1 | 0  | 0  | -1 | -1        | 0                | -1      |
| AT3G27750 | 0  | 0  | 0  | 0  | 0  | 0  | -1 | 0         | 0                | -1      |
| AT3G27770 | 0  | 0  | 0  | 0  | 0  | 0  | -1 | 0         | 0                | -1      |
| AT3G27820 | 0  | 0  | -1 | 0  | 0  | 0  | 0  | 0         | 0                | -1      |
| AT3G27830 | 0  | 0  | 0  | 0  | 0  | 0  | -1 | 0         | 0                | -1      |
| AT3G27850 | 0  | 0  | 0  | 0  | 0  | 0  | -1 | 0         | 0                | -1      |
| AT3G27870 | 0  | 0  | 0  | 0  | 0  | 0  | -1 | 0         | 0                | -1      |
| AT3G27884 | 0  | 0  | 0  | 0  | 0  | -1 | 0  | 0         | 0                | -1      |
| AT3G27890 | 0  | 0  | 0  | 0  | 0  | 0  | 1  | 0         | 0                | 1       |
| AT3G27950 | -1 | -1 | 0  | 0  | 0  | -1 | 0  | 0         | 0                | -1      |
| AT3G27960 | 0  | 0  | 0  | 0  | 0  | 0  | 1  | 0         | 0                | 1       |
| AT3G28040 | 0  | 0  | 0  | 0  | 0  | 0  | -1 | 0         | 0                | -1      |
| AT3G28080 | 0  | 0  | 0  | 0  | 0  | -1 | 0  | 0         | 0                | -1      |
| AT3G28180 | 0  | 1  | 1  | 0  | 0  | 0  | 1  | 0         | 0                | 1       |
| AT3G28200 | 1  | 1  | 1  | 0  | 0  | 1  | 0  | 0         | 1                | 1       |
| AT3G28220 | 0  | 0  | 0  | 0  | 0  | 0  | 0  | -1        | -1               | -1      |
| AT3G28270 | 1  | 0  | 0  | 0  | 1  | 0  | 0  | 0         | 0                | 1       |
| AT3G28340 | 1  | 1  | 1  | 0  | 0  | 1  | 0  | 1         | 1                | 1       |
| AT3G28510 | 0  | 0  | 0  | 0  | 0  | 0  | 0  | 1         | 1                | 1       |
| AT3G28550 | 0  | 0  | 0  | 0  | 0  | -1 | 0  | 0         | 0                | -1      |
| AT3G28580 | 0  | 0  | 0  | 0  | 0  | 0  | 0  | 1         | 0                | 1       |
| AT3G28690 | 0  | 0  | 0  | 0  | 0  | 0  | 1  | 0         | 0                | 1       |
| AT3G28857 | 0  | 0  | 0  | 0  | 0  | 0  | 0  | 1         | 1                | 1       |
| AT3G28900 | 0  | 0  | 0  | 0  | 0  | 0  | -1 | 0         | 0                | -1      |
| AT3G28910 | 1  | 1  | 0  | 0  | 0  | 0  | 1  | 0         | 0                | 1       |
| AT3G28930 | 0  | 0  | 0  | 0  | 0  | 0  | 0  | 0         | 1                | 1       |
| AT3G28940 | 0  | 0  | 0  | 0  | 0  | 0  | 1  | 1         | 0                | 1       |
| AT3G28950 | 0  | 0  | 0  | 0  | 0  | 0  | 1  | 0         | 0                | 1       |
| AT3G29000 | 0  | 0  | 0  | 0  | 0  | 1  | 0  | 1         | 0                | 1       |
| AT3G29030 | 1  | 1  | 1  | 0  | 0  | 0  | 0  | 0         | 0                | 1       |
| AT3G29090 | 0  | 0  | 0  | 0  | 0  | 0  | -1 | 0         | 0                | -1      |
| AT3G29120 | 0  | 0  | 0  | 0  | 0  | -1 | 0  | 0         | 0                | -1      |
| AT3G29140 | 0  | 0  | 0  | 0  | 0  | -1 | -1 | 0         | 0                | -1      |
| AT3G29170 | 0  | 0  | 1  | 0  | 0  | 0  | 0  | 0         | 0                | 1       |
| AT3G29185 | 0  | 0  | 0  | 0  | 0  | 0  | -1 | 0         | 0                | -1      |
| AT3G29205 | 0  | 0  | 0  | 0  | 0  | 1  | 0  | 0         | 0                | 1       |
| AT3G29230 | 0  | 0  | 0  | 0  | 0  | 0  | -1 | 0         | 0                | -1      |
| AT3G29250 | 0  | 0  | 0  | 0  | 0  | -1 | 0  | 0         | 0                | -1      |
| AT3G29252 | 0  | 0  | 0  | 0  | 0  | -1 | 0  | 0         | 0                | -1      |
| AT3G29260 | 0  | 0  | 0  | 0  | 0  | -1 | 0  | 0         | 0                | -1      |
| AT3G29360 | 0  | 0  | 0  | 0  | 0  | 0  | 1  | 0         | 0                | 1       |
| AT3G29575 | -1 | 0  | 0  | 0  | 0  | 0  | 0  | 0         | 0                | -1      |
| AT3G29644 | 0  | 0  | 0  | 0  | 0  | 1  | 0  | 0         | 0                | 1       |
| AT3G29680 | 0  | 0  | 0  | 0  | 0  | -1 | 0  | 0         | 0                | -1      |
| AT3G30180 | -1 | -1 | -1 | 0  | -1 | -1 | -1 | -1        | -1               | -1      |
| AT3G30210 | 0  | 0  | 0  | 0  | 0  | 0  | 0  | -1        | 0                | -1      |
| AT3G30214 | 0  | 0  | 0  | 0  | 0  | -1 | 0  | 0         | 0                | -1      |
| AT3G30350 | 0  | 0  | 0  | 0  | 0  | -1 | 0  | 0         | 0                | -1      |
| AT3G30420 | 0  | 0  | 0  | 0  | 0  | 1  | 0  | 0         | 0                | 1       |
| AT3G30737 | 0  | 0  | 0  | 0  | 0  | -1 | 0  | 0         | 0                | -1      |
| AT3G30775 | 1  | 1  | 1  | 0  | 0  | 0  | 0  | 0         | 0                | 1       |
| AT3G32091 | 0  | 0  | 0  | 0  | 0  | -1 | 0  | 0         | 0                | -1      |
| AT3G32110 | 0  | 0  | 0  | 0  | 0  | 1  | 0  | 0         | 0                | 1       |
| AT3G32930 | 0  | 0  | 0  | 0  | 0  | 0  | -1 | 0         | 0                | -1      |

Appendix Table S1

| Name      | 1  | 2  | 3  | 4 | 5 | 6  | 7  | bes1D_Col | bes1Dpif45_pif45 | ALL_BES |
|-----------|----|----|----|---|---|----|----|-----------|------------------|---------|
| AT3G33520 | 0  | 0  | 0  | 0 | 0 | 0  | -1 | 0         | 0                | -1      |
| AT3G36659 | 0  | 0  | 0  | 0 | 0 | 1  | 0  | 0         | 0                | 1       |
| AT3G42150 | 0  | 0  | 0  | 0 | 0 | 0  | -1 | 0         | 0                | -1      |
| AT3G42658 | 0  | 0  | 0  | 0 | 0 | -1 | 0  | 0         | 0                | -1      |
| AT3G42725 | 0  | 0  | 0  | 0 | 0 | 1  | 0  | 0         | 0                | 1       |
| AT3G42800 | 0  | 0  | 0  | 0 | 0 | 1  | 1  | 0         | 0                | 1       |
| AT3G42950 | 0  | 0  | 0  | 0 | 0 | 0  | 1  | 0         | 0                | 1       |
| AT3G43200 | 0  | 0  | 0  | 0 | 0 | 1  | 0  | 0         | 0                | 1       |
| AT3G43220 | 0  | 0  | 0  | 0 | 0 | 0  | 1  | 0         | 0                | 1       |
| AT3G43230 | 0  | 0  | -1 | 0 | 0 | 0  | 0  | 0         | 0                | -1      |
| AT3G43240 | 0  | 0  | -1 | 0 | 0 | 0  | 0  | 0         | 0                | -1      |
| AT3G43430 | 0  | 0  | 0  | 0 | 0 | 1  | 0  | 0         | 0                | 1       |
| AT3G43540 | 0  | 0  | 0  | 0 | 0 | 0  | -1 | 0         | 0                | -1      |
| AT3G43720 | 1  | 1  | 1  | 0 | 0 | 1  | 1  | 0         | 0                | 1       |
| AT3G43810 | 0  | 0  | 0  | 0 | 0 | 0  | 1  | 0         | 0                | 1       |
| AT3G44020 | 0  | 0  | 0  | 0 | 0 | 0  | -1 | 0         | 0                | -1      |
| AT3G44042 | 0  | 0  | 0  | 0 | 0 | 1  | 0  | 0         | 1                | 1       |
| AT3G44120 | 0  | 0  | 0  | 0 | 0 | -1 | 0  | 0         | 0                | -1      |
| AT3G44330 | 0  | 0  | 0  | 0 | 0 | 0  | -1 | 0         | 0                | -1      |
| AT3G44380 | 0  | 0  | 0  | 0 | 0 | 0  | -1 | 0         | 0                | -1      |
| AT3G44430 | 0  | 0  | 0  | 0 | 0 | 0  | -1 | 0         | 0                | -1      |
| AT3G44450 | -1 | 0  | 0  | 0 | 0 | 0  | 0  | 0         | 0                | -1      |
| AT3G44510 | 0  | 0  | 0  | 0 | 0 | 0  | 1  | 0         | 0                | 1       |
| AT3G44540 | 0  | 0  | 0  | 0 | 0 | 0  | 0  | 0         | 1                | 1       |
| AT3G44550 | 0  | 0  | 0  | 0 | 0 | 1  | 0  | 0         | 0                | 1       |
| AT3G44610 | -1 | -1 | 0  | 0 | 0 | 0  | 0  | 0         | 0                | -1      |
| AT3G44735 | 0  | 1  | 0  | 0 | 0 | 0  | 0  | 0         | 0                | 1       |
| AT3G44750 | 0  | 0  | 0  | 0 | 0 | -1 | 0  | 0         | 0                | -1      |
| AT3G44798 | 0  | 0  | 0  | 0 | 0 | 1  | 0  | 0         | 0                | 1       |
| AT3G44860 | 0  | 0  | 0  | 0 | 0 | 0  | 0  | 1         | 1                | 1       |
| AT3G44890 | 0  | 0  | 0  | 0 | 0 | 0  | -1 | 0         | 0                | -1      |
| AT3G45010 | 0  | 0  | 0  | 0 | 0 | 1  | 1  | 0         | 0                | 1       |
| AT3G45050 | 0  | 0  | 0  | 0 | 0 | 0  | -1 | 0         | 0                | -1      |
| AT3G45070 | 0  | 0  | 0  | 0 | 0 | -1 | 0  | 0         | 0                | -1      |
| AT3G45080 | 0  | 0  | 0  | 0 | 0 | -1 | 0  | 0         | 0                | -1      |
| AT3G45100 | 0  | 0  | 0  | 0 | 0 | 0  | -1 | 0         | 0                | -1      |
| AT3G45230 | 1  | 1  | 1  | 0 | 0 | 0  | 0  | 0         | 0                | 1       |
| AT3G45260 | 0  | 0  | -1 | 0 | 0 | 0  | 0  | 0         | 0                | -1      |
| AT3G45310 | 0  | 0  | 0  | 0 | 0 | 0  | 1  | 0         | 0                | 1       |
| AT3G45530 | 0  | 0  | 0  | 0 | 0 | 1  | 0  | 0         | 0                | 1       |
| AT3G45700 | 0  | 0  | 0  | 0 | 0 | 0  | 1  | 0         | 0                | 1       |
| AT3G45710 | 0  | 0  | -1 | 0 | 0 | -1 | 0  | 0         | 0                | -1      |
| AT3G45740 | 0  | 0  | -1 | 0 | 0 | 0  | 0  | 0         | 0                | -1      |
| AT3G45770 | 0  | 0  | 0  | 0 | 0 | 0  | -1 | 0         | 0                | -1      |
| AT3G45780 | -1 | -1 | 0  | 0 | 0 | 0  | 0  | 0         | 0                | -1      |
| AT3G45840 | 0  | 0  | 0  | 0 | 0 | 1  | 0  | 0         | 0                | 1       |
| AT3G45920 | 0  | 0  | 0  | 0 | 0 | 1  | 0  | 0         | 0                | 1       |
| AT3G45960 | 1  | 1  | 0  | 0 | 0 | 0  | 1  | 0         | 0                | 1       |
| AT3G45970 | 1  | 1  | 0  | 0 | 1 | 1  | 1  | 0         | 0                | 1       |
| AT3G45980 | 0  | 0  | 0  | 0 | 0 | 0  | 1  | 0         | 0                | 1       |
| AT3G46010 | 0  | 0  | 0  | 0 | 0 | 0  | 1  | 0         | 0                | 1       |
| AT3G46020 | 0  | 0  | 0  | 0 | 0 | 0  | -1 | 0         | 0                | -1      |
| AT3G46040 | 0  | 0  | 0  | 0 | 0 | 0  | -1 | 0         | 0                | -1      |
| AT3G46080 | 0  | 0  | 0  | 0 | 0 | 1  | 0  | 0         | 0                | 1       |
| AT3G46090 | 0  | 0  | 0  | 1 | 0 | 0  | 0  | 0         | 0                | 1       |
| AT3G46130 | 0  | 0  | -1 | 0 | 0 | 0  | 0  | 0         | 0                | -1      |
| AT3G46230 | 0  | 0  | 0  | 0 | 0 | 0  | 0  | 0         | 1                | 1       |
| AT3G46270 | 0  | 0  | 0  | 0 | 0 | 0  | 0  | 0         | 1                | 1       |
| AT3G46280 | 0  | 0  | 0  | 0 | 0 | 0  | 1  | 0         | 0                | 1       |
| AT3G46290 | 0  | 0  | 0  | 0 | 0 | 0  | 1  | 0         | 0                | 1       |
| AT3G46330 | 0  | 0  | 0  | 0 | 0 | 1  | 0  | 0         | 0                | 1       |

Appendix Table S1

| Name      | 1  | 2  | 3  | 4  | 5 | 6  | 7  | bes1D_Col | bes1Dpif45_pif45 | ALL_BES |
|-----------|----|----|----|----|---|----|----|-----------|------------------|---------|
| AT3G46400 | 0  | 0  | 0  | 0  | 0 | -1 | 0  | 0         | 0                | -1      |
| AT3G46490 | 0  | 0  | 0  | 0  | 0 | -1 | 0  | 0         | 0                | -1      |
| AT3G46600 | 0  | 0  | 1  | 0  | 0 | 0  | 0  | 0         | 0                | 1       |
| AT3G46640 | 0  | 0  | 0  | 0  | 0 | 0  | -1 | 0         | 0                | -1      |
| AT3G46690 | 0  | 0  | 0  | 0  | 0 | 1  | 0  | 0         | 0                | 1       |
| AT3G46820 | 0  | 0  | -1 | 0  | 0 | 0  | 0  | 0         | 0                | -1      |
| AT3G46830 | 0  | 0  | 0  | 0  | 0 | 0  | 1  | 0         | 0                | 1       |
| AT3G46840 | 0  | 0  | 0  | 1  | 0 | 0  | 0  | 0         | 0                | 1       |
| AT3G46930 | 0  | 0  | 0  | 0  | 0 | 0  | 1  | 0         | 0                | 1       |
| AT3G47010 | 0  | 0  | 0  | 0  | 0 | 0  | -1 | 0         | 0                | -1      |
| AT3G47040 | 0  | 0  | 0  | 0  | 0 | 1  | 0  | 0         | 0                | 1       |
| AT3G47070 | 0  | 0  | 0  | 0  | 0 | 0  | -1 | 0         | 0                | -1      |
| AT3G47110 | 0  | 0  | 0  | 0  | 0 | 1  | 0  | 0         | 0                | 1       |
| AT3G47295 | 0  | 0  | 0  | 0  | 0 | 0  | -1 | 0         | 0                | -1      |
| AT3G47340 | 0  | 1  | 0  | 0  | 0 | 0  | 0  | 0         | 0                | 1       |
| AT3G47380 | 0  | 0  | 0  | 1  | 0 | 0  | 0  | 0         | 0                | 1       |
| AT3G47400 | 0  | 0  | 0  | 0  | 0 | 1  | 0  | 0         | 0                | 1       |
| AT3G47470 | 0  | 0  | 0  | 0  | 0 | 0  | -1 | 0         | 0                | -1      |
| AT3G47480 | 0  | 0  | 0  | 0  | 0 | 0  | 0  | 0         | 1                | 1       |
| AT3G47490 | 0  | 0  | 0  | 0  | 0 | 0  | -1 | 0         | 0                | -1      |
| AT3G47560 | -1 | -1 | -1 | 0  | 0 | 0  | 0  | 0         | 0                | -1      |
| AT3G47570 | 1  | 0  | 0  | 0  | 0 | 0  | 0  | 0         | 0                | 1       |
| AT3G47650 | 0  | 0  | 0  | 0  | 0 | 0  | -1 | 0         | 0                | -1      |
| AT3G47670 | 0  | 0  | 0  | 0  | 0 | 0  | 1  | 0         | 0                | 1       |
| AT3G47800 | -1 | -1 | 0  | -1 | 0 | 0  | 0  | 0         | 0                | -1      |
| AT3G47860 | 0  | 0  | 0  | 0  | 0 | 0  | -1 | 0         | 0                | -1      |
| AT3G48020 | 0  | 0  | 0  | 0  | 0 | 1  | 0  | 0         | 0                | 1       |
| AT3G48090 | 0  | 0  | 0  | 0  | 0 | 0  | 1  | 0         | 0                | 1       |
| AT3G48100 | 0  | 0  | 0  | 0  | 0 | 0  | 1  | 0         | 0                | 1       |
| AT3G48360 | 0  | 0  | 0  | -1 | 0 | 0  | 0  | 0         | 0                | -1      |
| AT3G48450 | 0  | 0  | 0  | 0  | 0 | 0  | 0  | 1         | 1                | 1       |
| AT3G48510 | 0  | 0  | 0  | 0  | 0 | 1  | 0  | 0         | 0                | 1       |
| AT3G48520 | 0  | 0  | 0  | 0  | 0 | 0  | 1  | 0         | 0                | 1       |
| AT3G48560 | 0  | 0  | 0  | 0  | 0 | 0  | -1 | 0         | 0                | -1      |
| AT3G48610 | -1 | -1 | 0  | 0  | 0 | 0  | 0  | 0         | 0                | -1      |
| AT3G48640 | 0  | 0  | 0  | 0  | 0 | 0  | 0  | 1         | 1                | 1       |
| AT3G48690 | -1 | -1 | -1 | 0  | 0 | 0  | 0  | 0         | 0                | -1      |
| AT3G48720 | 1  | 1  | 0  | 0  | 0 | 0  | 0  | 0         | 0                | 1       |
| AT3G48730 | 0  | 0  | 0  | 0  | 0 | 0  | -1 | 0         | 0                | -1      |
| AT3G48740 | 0  | 0  | 0  | 0  | 0 | 0  | 1  | 0         | 0                | 1       |
| AT3G48760 | 0  | 0  | 0  | 0  | 0 | 0  | 1  | 0         | 0                | 1       |
| AT3G48850 | 0  | 0  | 0  | 0  | 0 | 0  | 0  | 1         | 0                | 1       |
| AT3G48940 | 0  | 0  | 0  | 0  | 0 | 1  | 0  | 0         | 0                | 1       |
| AT3G48970 | -1 | 0  | 0  | 0  | 0 | 0  | 0  | 0         | 0                | -1      |
| AT3G49160 | -1 | -1 | 0  | 0  | 0 | 0  | 0  | 0         | 0                | -1      |
| AT3G49220 | 1  | 1  | 0  | 0  | 0 | 1  | 1  | 0         | 0                | 1       |
| AT3G49330 | 0  | 0  | 0  | 0  | 0 | 1  | 0  | 0         | 0                | 1       |
| AT3G49350 | 0  | 0  | 0  | 0  | 0 | 0  | 1  | 0         | 0                | 1       |
| AT3G49360 | 0  | 0  | 0  | 0  | 0 | 0  | 1  | 0         | 0                | 1       |
| AT3G49470 | 0  | 0  | 0  | 0  | 0 | 0  | -1 | 0         | 0                | -1      |
| AT3G49500 | 0  | 0  | 0  | 0  | 0 | 0  | -1 | 0         | 0                | -1      |
| AT3G49620 | 0  | 0  | -1 | 0  | 0 | 0  | 0  | 0         | 0                | -1      |
| AT3G49630 | 0  | 0  | 0  | 0  | 0 | -1 | 0  | 0         | 0                | -1      |
| AT3G49640 | 0  | 0  | 1  | 0  | 0 | 0  | 0  | 0         | 0                | 1       |
| AT3G49720 | 0  | 1  | 0  | 0  | 0 | 0  | 1  | 0         | 0                | 1       |
| AT3G49810 | 0  | -1 | 0  | 0  | 0 | 0  | 0  | 0         | 0                | -1      |
| AT3G49820 | 0  | 0  | 0  | 0  | 0 | 1  | 0  | 0         | 0                | 1       |
| AT3G49840 | 0  | 0  | 0  | 0  | 0 | 0  | 1  | 0         | 0                | 1       |
| AT3G49845 | 0  | 0  | 0  | 0  | 0 | 1  | 0  | 0         | 0                | 1       |
| AT3G49940 | 0  | 0  | 0  | 0  | 0 | 0  | -1 | 0         | 0                | -1      |
| AT3G49960 | 0  | 0  | 0  | 0  | 0 | -1 | 0  | 0         | 0                | -1      |

Appendix Table S1

| Name      | 1  | 2  | 3  | 4  | 5 | 6  | 7  | bes1D_Col | bes1Dpif45_pif45 | ALL_BES |
|-----------|----|----|----|----|---|----|----|-----------|------------------|---------|
| AT3G50070 | -1 | -1 | -1 | 0  | 0 | 0  | -1 | 0         | 0                | -1      |
| AT3G50120 | 0  | 0  | 0  | 0  | 0 | 1  | 0  | 0         | 0                | 1       |
| AT3G50130 | 0  | 0  | 0  | 0  | 0 | 0  | 0  | 0         | 1                | 1       |
| AT3G50140 | 1  | 1  | 0  | 0  | 0 | 1  | 0  | 0         | 1                | 1       |
| AT3G50160 | 0  | 0  | 0  | 0  | 0 | 0  | 0  | 0         | 1                | 1       |
| AT3G50190 | 0  | 0  | 0  | 0  | 0 | 1  | 0  | 0         | 0                | 1       |
| AT3G50220 | 0  | 0  | 0  | 0  | 0 | 1  | 0  | 0         | 0                | 1       |
| AT3G50230 | 0  | 0  | 0  | 0  | 0 | -1 | 0  | 0         | 0                | -1      |
| AT3G50240 | 1  | 0  | 0  | 0  | 0 | 0  | 0  | 0         | 0                | 1       |
| AT3G50260 | 0  | 0  | 0  | 0  | 0 | 1  | 0  | 0         | 0                | 1       |
| AT3G50270 | 0  | 0  | 0  | 0  | 0 | 0  | -1 | 0         | 0                | -1      |
| AT3G50300 | 0  | 0  | 0  | 0  | 0 | -1 | 0  | 0         | 0                | -1      |
| AT3G50340 | 0  | 1  | 0  | 0  | 0 | 0  | 0  | 0         | 0                | 1       |
| AT3G50350 | 0  | 0  | 0  | 0  | 0 | 0  | 1  | 0         | 0                | 1       |
| AT3G50400 | 0  | 0  | 0  | 0  | 0 | 1  | 0  | 1         | 1                | 1       |
| AT3G50460 | 0  | 0  | 0  | 0  | 0 | 0  | 0  | 1         | 0                | 1       |
| AT3G50560 | 1  | 1  | 1  | 0  | 1 | 0  | 0  | 0         | 0                | 1       |
| AT3G50570 | 1  | 1  | 0  | 0  | 0 | 1  | 0  | 0         | 0                | 1       |
| AT3G50650 | 1  | 1  | 0  | 0  | 0 | 0  | 0  | 0         | 0                | 1       |
| AT3G50660 | -1 | -1 | -1 | -1 | 0 | -1 | -1 | -1        | -1               | -1      |
| AT3G50685 | 0  | 0  | 0  | 0  | 0 | 0  | -1 | 0         | 0                | -1      |
| AT3G50750 | -1 | -1 | -1 | 0  | 0 | 0  | -1 | 0         | 0                | -1      |
| AT3G50760 | 0  | 0  | 0  | 1  | 0 | 0  | 0  | 0         | 1                | 1       |
| AT3G50770 | 0  | 0  | 0  | 1  | 0 | 0  | 0  | 0         | 0                | 1       |
| AT3G50790 | 0  | 0  | 0  | 0  | 0 | 0  | -1 | 0         | 0                | -1      |
| AT3G50800 | 0  | 0  | 0  | 0  | 0 | 0  | 0  | -1        | 0                | -1      |
| AT3G50820 | 0  | 0  | 0  | 0  | 0 | 0  | -1 | 0         | 0                | -1      |
| AT3G50830 | 0  | 0  | 1  | 0  | 0 | 0  | 1  | 0         | 0                | 1       |
| AT3G50890 | 1  | 0  | 0  | 0  | 0 | 0  | 0  | 0         | 0                | 1       |
| AT3G50920 | 0  | 0  | 0  | 0  | 0 | 0  | -1 | 0         | 0                | -1      |
| AT3G50930 | 0  | 0  | 0  | 0  | 0 | 1  | 0  | 1         | 1                | 1       |
| AT3G50950 | 0  | 0  | 0  | 1  | 0 | 0  | 0  | 0         | 0                | 1       |
| AT3G50970 | 0  | 0  | 0  | 0  | 0 | 0  | 0  | 0         | -1               | -1      |
| AT3G50980 | 0  | 0  | 0  | 0  | 0 | -1 | 0  | 0         | 0                | -1      |
| AT3G51140 | 0  | 0  | 0  | 0  | 0 | 0  | -1 | 0         | 0                | -1      |
| AT3G51160 | 0  | 0  | 0  | 0  | 0 | 0  | 1  | 0         | 0                | 1       |
| AT3G51250 | 0  | 0  | 0  | 0  | 0 | 0  | 1  | 0         | 0                | 1       |
| AT3G51260 | 0  | 0  | 0  | 0  | 0 | 0  | 1  | 0         | 0                | 1       |
| AT3G51280 | 0  | 0  | 0  | 0  | 0 | 1  | 0  | 0         | 0                | 1       |
| AT3G51290 | -1 | -1 | 0  | 0  | 0 | 0  | 0  | 0         | 0                | -1      |
| AT3G51370 | 0  | 0  | -1 | 0  | 0 | 0  | 0  | 0         | 0                | -1      |
| AT3G51400 | 0  | 0  | 0  | 0  | 0 | -1 | -1 | -1        | -1               | -1      |
| AT3G51410 | 0  | 0  | 0  | 0  | 0 | 0  | 0  | 0         | 1                | 1       |
| AT3G51420 | 0  | 0  | 0  | 0  | 0 | 0  | -1 | 0         | 0                | -1      |
| AT3G51430 | 0  | -1 | 0  | 0  | 0 | 0  | 0  | 0         | 0                | -1      |
| AT3G51450 | -1 | 0  | 0  | 0  | 0 | 0  | 0  | 0         | 0                | -1      |
| AT3G51490 | 0  | 0  | 0  | 0  | 0 | -1 | 0  | 0         | 0                | -1      |
| AT3G51510 | 0  | 0  | 0  | 0  | 0 | 0  | -1 | 0         | 0                | -1      |
| AT3G51600 | 0  | -1 | 0  | -1 | 0 | 0  | 0  | 0         | 0                | -1      |
| AT3G51660 | 0  | 0  | 0  | 0  | 0 | 1  | 0  | 0         | 0                | 1       |
| AT3G51670 | 0  | 0  | 0  | 0  | 0 | 0  | 1  | 0         | 0                | 1       |
| AT3G51730 | 0  | 0  | 0  | 0  | 0 | 0  | 1  | 0         | 0                | 1       |
| AT3G51820 | 0  | 0  | 0  | 0  | 0 | 0  | -1 | 0         | 0                | -1      |
| AT3G51830 | 0  | 0  | -1 | 0  | 0 | 0  | 0  | 0         | 0                | -1      |
| AT3G51870 | 0  | 0  | 0  | 0  | 0 | 0  | -1 | 0         | 0                | -1      |
| AT3G51880 | 0  | 0  | 0  | 0  | 0 | 0  | 1  | 0         | 0                | 1       |
| AT3G51920 | 0  | 0  | 0  | 1  | 0 | 0  | 0  | 0         | 0                | 1       |
| AT3G51930 | 0  | 0  | 0  | 0  | 0 | 1  | 0  | 0         | 0                | 1       |
| AT3G51950 | 0  | 0  | 0  | 0  | 0 | 0  | 1  | 0         | 0                | 1       |
| AT3G51970 | 0  | 0  | 0  | 0  | 0 | 1  | 0  | 0         | 0                | 1       |
| AT3G52070 | 0  | 0  | 0  | 0  | 0 | 0  | -1 | 0         | 0                | -1      |

Appendix Table S1

| Name      | 1  | 2 | 3  | 4 | 5 | 6  | 7  | bes1D_Col | bes1Dpif45_pif45 | ALL_BES |
|-----------|----|---|----|---|---|----|----|-----------|------------------|---------|
| AT3G52155 | 0  | 0 | -1 | 0 | 0 | 0  | -1 | 0         | 0                | -1      |
| AT3G52170 | 0  | 0 | -1 | 0 | 0 | 0  | 0  | 0         | 0                | -1      |
| AT3G52220 | 0  | 0 | 0  | 0 | 0 | 0  | 1  | 0         | 0                | 1       |
| AT3G52230 | 0  | 0 | 0  | 0 | 0 | 0  | -1 | 0         | 0                | -1      |
| AT3G52340 | 0  | 0 | 0  | 0 | 0 | 0  | -1 | 0         | 0                | -1      |
| AT3G52370 | 0  | 0 | 0  | 0 | 0 | 1  | 1  | 0         | 0                | 1       |
| AT3G52380 | 0  | 0 | 0  | 0 | 0 | 0  | -1 | 0         | 0                | -1      |
| AT3G52430 | 0  | 0 | 0  | 1 | 0 | 0  | 0  | 0         | 0                | 1       |
| AT3G52460 | 0  | 0 | 0  | 0 | 0 | 1  | 1  | 0         | 0                | 1       |
| AT3G52470 | 0  | 0 | 0  | 0 | 0 | 0  | 1  | 0         | 0                | 1       |
| AT3G52480 | 0  | 0 | 0  | 1 | 0 | 0  | 0  | 0         | 0                | 1       |
| AT3G52500 | 0  | 0 | 0  | 1 | 0 | 0  | 1  | 0         | 0                | 1       |
| AT3G52520 | 0  | 0 | 0  | 0 | 0 | 1  | 0  | 0         | 0                | 1       |
| AT3G52540 | -1 | 0 | 0  | 0 | 0 | 0  | 0  | 0         | 0                | -1      |
| AT3G52610 | 0  | 0 | -1 | 0 | 0 | 0  | 0  | 0         | 0                | -1      |
| AT3G52720 | 0  | 0 | 0  | 0 | 0 | 0  | 1  | 0         | 0                | 1       |
| AT3G52750 | 0  | 0 | 0  | 0 | 0 | 0  | -1 | 0         | 0                | -1      |
| AT3G52790 | 0  | 0 | 0  | 0 | 0 | 1  | 0  | 0         | 0                | 1       |
| AT3G52820 | 0  | 0 | 0  | 0 | 0 | 1  | 0  | 0         | 0                | 1       |
| AT3G52870 | -1 | 0 | -1 | 0 | 0 | 0  | 0  | 0         | 0                | -1      |
| AT3G52910 | 0  | 0 | 0  | 0 | 0 | -1 | -1 | 0         | 0                | -1      |
| AT3G52920 | 0  | 0 | 0  | 0 | 0 | 0  | 1  | 0         | 0                | 1       |
| AT3G53010 | 0  | 0 | 0  | 0 | 0 | 1  | 0  | 0         | 0                | 1       |
| AT3G53040 | 0  | 0 | 0  | 0 | 0 | -1 | 0  | 0         | 0                | -1      |
| AT3G53130 | 0  | 0 | -1 | 0 | 0 | 0  | 0  | 0         | 0                | -1      |
| AT3G53150 | 0  | 0 | 0  | 0 | 0 | 0  | 0  | 0         | 1                | 1       |
| AT3G53160 | 0  | 0 | 0  | 0 | 0 | 0  | 0  | 0         | 1                | 1       |
| AT3G53200 | 0  | 0 | 0  | 0 | 0 | 1  | 1  | 0         | 0                | 1       |
| AT3G53380 | 0  | 0 | 0  | 0 | 0 | 0  | -1 | 0         | 0                | -1      |
| AT3G53390 | 0  | 0 | -1 | 0 | 0 | 0  | 0  | 0         | 0                | -1      |
| AT3G53420 | 0  | 0 | 0  | 0 | 0 | 0  | 1  | 0         | 0                | 1       |
| AT3G53460 | 0  | 0 | 0  | 0 | 0 | 0  | -1 | 0         | 0                | -1      |
| AT3G53470 | 0  | 0 | 0  | 0 | 0 | 0  | -1 | 0         | 0                | -1      |
| AT3G53510 | 0  | 0 | 0  | 0 | 0 | 0  | 0  | 0         | 1                | 1       |
| AT3G53600 | 0  | 0 | 0  | 0 | 0 | 0  | 0  | 0         | 1                | 1       |
| AT3G53620 | 1  | 0 | 0  | 0 | 0 | 1  | 1  | 0         | 1                | 1       |
| AT3G53650 | 0  | 0 | 1  | 0 | 0 | 0  | 0  | 0         | 0                | 1       |
| AT3G53670 | 0  | 0 | 0  | 0 | 0 | 0  | 1  | 0         | 0                | 1       |
| AT3G53680 | 0  | 0 | 0  | 0 | 0 | 1  | 0  | 0         | 0                | 1       |
| AT3G53700 | 0  | 0 | 0  | 0 | 0 | 0  | -1 | 0         | 0                | -1      |
| AT3G53810 | 0  | 0 | 1  | 0 | 0 | 0  | 0  | 0         | 0                | 1       |
| AT3G53880 | 0  | 0 | -1 | 0 | 0 | 0  | 0  | 0         | 0                | -1      |
| AT3G53920 | 0  | 0 | -1 | 0 | 0 | 0  | 0  | 0         | 0                | -1      |
| AT3G53950 | 0  | 0 | 0  | 0 | 0 | 0  | -1 | 0         | 0                | -1      |
| AT3G53980 | 0  | 0 | 0  | 0 | 0 | -1 | -1 | 0         | -1               | -1      |
| AT3G53990 | 0  | 0 | 0  | 0 | 0 | 0  | 1  | 0         | 0                | 1       |
| AT3G54000 | 1  | 1 | 0  | 0 | 0 | 0  | 1  | 0         | 0                | 1       |
| AT3G54020 | 0  | 0 | 0  | 0 | 0 | 1  | 0  | 0         | 0                | 1       |
| AT3G54030 | 0  | 1 | 0  | 0 | 0 | 0  | 0  | 0         | 0                | 1       |
| AT3G54090 | 0  | 0 | 0  | 0 | 0 | 0  | -1 | 0         | 0                | -1      |
| AT3G54120 | 0  | 0 | 0  | 0 | 0 | 1  | 0  | 0         | 0                | 1       |
| AT3G54150 | 0  | 0 | 0  | 0 | 0 | 0  | 0  | 1         | 0                | 1       |
| AT3G54210 | 0  | 0 | 0  | 0 | 0 | 0  | -1 | 0         | 0                | -1      |
| AT3G54380 | 0  | 0 | 0  | 0 | 0 | 0  | -1 | 0         | 0                | -1      |
| AT3G54400 | 0  | 0 | 0  | 0 | 0 | 1  | 1  | 0         | 0                | 1       |
| AT3G54410 | 0  | 0 | 0  | 0 | 0 | 1  | 0  | 0         | 0                | 1       |
| AT3G54420 | 0  | 0 | 0  | 0 | 0 | 1  | 0  | 0         | 0                | 1       |
| AT3G54510 | 1  | 0 | 0  | 0 | 0 | 0  | 0  | 0         | 0                | 1       |
| AT3G54520 | 0  | 0 | 0  | 0 | 0 | 1  | 0  | 0         | 0                | 1       |
| AT3G54580 | 0  | 0 | 0  | 0 | 0 | -1 | 0  | 0         | 0                | -1      |
| AT3G54590 | 0  | 0 | 0  | 0 | 0 | -1 | 0  | 0         | 0                | -1      |





Appendix Table S1

| Name      | 1  | 2  | 3  | 4  | 5 | 6  | 7  | bes1D_Col | bes1Dpif45_pif45 | ALL_BES |
|-----------|----|----|----|----|---|----|----|-----------|------------------|---------|
| AT3G57010 | -1 | -1 | -1 | 0  | 0 | -1 | 0  | -1        | -1               | -1      |
| AT3G57020 | 0  | 0  | 0  | 0  | 0 | -1 | 0  | 0         | 0                | -1      |
| AT3G57050 | 0  | 0  | 0  | 0  | 0 | 0  | -1 | 0         | 0                | -1      |
| AT3G57070 | 0  | 0  | 0  | 0  | 0 | 0  | 1  | 0         | 0                | 1       |
| AT3G57170 | 0  | 0  | 0  | 0  | 0 | 0  | -1 | 0         | 0                | -1      |
| AT3G57240 | 0  | 0  | 0  | 1  | 0 | 0  | 0  | 0         | 0                | 1       |
| AT3G57380 | 0  | 0  | 0  | 0  | 0 | 1  | 1  | 0         | 0                | 1       |
| AT3G57420 | 0  | 0  | 1  | 0  | 0 | 0  | 0  | 0         | 0                | 1       |
| AT3G57450 | 1  | 1  | 1  | 0  | 0 | 0  | 0  | 0         | 0                | 1       |
| AT3G57510 | 0  | 0  | 0  | 0  | 0 | 1  | 0  | 0         | 0                | 1       |
| AT3G57520 | 0  | 0  | 0  | 0  | 0 | 1  | 0  | 0         | 0                | 1       |
| AT3G57530 | 0  | 0  | 0  | 0  | 0 | 0  | 1  | 0         | 0                | 1       |
| AT3G57600 | 0  | 0  | 0  | 0  | 0 | -1 | 0  | 0         | 0                | -1      |
| AT3G57630 | 0  | 0  | 0  | 0  | 0 | 0  | 1  | 0         | 0                | 1       |
| AT3G57770 | 0  | 0  | 0  | 0  | 0 | 0  | -1 | 0         | 0                | -1      |
| AT3G57780 | 1  | 1  | 0  | 0  | 0 | 0  | 0  | 0         | 0                | 1       |
| AT3G57785 | 0  | 0  | 0  | 0  | 0 | 0  | -1 | 0         | 0                | -1      |
| AT3G57800 | 0  | 0  | 0  | 0  | 0 | 0  | -1 | 0         | 0                | -1      |
| AT3G57810 | 0  | 0  | 0  | 0  | 0 | 0  | -1 | 0         | 0                | -1      |
| AT3G57880 | -1 | -1 | 0  | 0  | 0 | 0  | -1 | 0         | 0                | -1      |
| AT3G58040 | 0  | -1 | 0  | 0  | 0 | 0  | 0  | 0         | 0                | -1      |
| AT3G58060 | 0  | 0  | 0  | 0  | 0 | 1  | 0  | 0         | 0                | 1       |
| AT3G58120 | 1  | 1  | 0  | 0  | 0 | 0  | 1  | 0         | 0                | 1       |
| AT3G58140 | 0  | 0  | 0  | 0  | 0 | 0  | -1 | 0         | 0                | -1      |
| AT3G58190 | 0  | 0  | 0  | 0  | 0 | 1  | 0  | 0         | 0                | 1       |
| AT3G58450 | 0  | 0  | 0  | 0  | 0 | -1 | 0  | 0         | 0                | -1      |
| AT3G58460 | 0  | 0  | -1 | 0  | 0 | 0  | 0  | 0         | 0                | -1      |
| AT3G58470 | 0  | 0  | 0  | 0  | 0 | 0  | -1 | 0         | 0                | -1      |
| AT3G58530 | 0  | 0  | 0  | 0  | 0 | 0  | -1 | 0         | 0                | -1      |
| AT3G58600 | 0  | 0  | 0  | 0  | 0 | 0  | 1  | 0         | 0                | 1       |
| AT3G58610 | 0  | 0  | 0  | 0  | 0 | 0  | -1 | 0         | 0                | -1      |
| AT3G58620 | 0  | 1  | 1  | 0  | 0 | 0  | 0  | 0         | 0                | 1       |
| AT3G58700 | 0  | 0  | 0  | 0  | 0 | 0  | -1 | 0         | 0                | -1      |
| AT3G58790 | 1  | 1  | 0  | 0  | 0 | 0  | 0  | 0         | 0                | 1       |
| AT3G58830 | 0  | 0  | 0  | 0  | 0 | 0  | -1 | 0         | 0                | -1      |
| AT3G58850 | 0  | 0  | 0  | 0  | 0 | 1  | 0  | 0         | 0                | 1       |
| AT3G58990 | -1 | 0  | 0  | 0  | 0 | 0  | 0  | 0         | 0                | -1      |
| AT3G59010 | 0  | 0  | 0  | 0  | 0 | 0  | 1  | 0         | 0                | 1       |
| AT3G59220 | 0  | 0  | 0  | 0  | 0 | -1 | 0  | 0         | 0                | -1      |
| AT3G59340 | 0  | 0  | 0  | 0  | 0 | -1 | 0  | -1        | 0                | -1      |
| AT3G59350 | 1  | 1  | 0  | 0  | 0 | 0  | 0  | 0         | 0                | 1       |
| AT3G59360 | 0  | 0  | 0  | 0  | 0 | 0  | 1  | 0         | 0                | 1       |
| AT3G59380 | 0  | 0  | 0  | 0  | 0 | 0  | -1 | 0         | 0                | -1      |
| AT3G59400 | 0  | 0  | 0  | 0  | 0 | 0  | -1 | 0         | 0                | -1      |
| AT3G59440 | 0  | 0  | 0  | 0  | 0 | 1  | 0  | 0         | 0                | 1       |
| AT3G59660 | 0  | 0  | 0  | 0  | 0 | 0  | 1  | 0         | 0                | 1       |
| AT3G59690 | 0  | 0  | 0  | 0  | 0 | 0  | 1  | 0         | 0                | 1       |
| AT3G59710 | 0  | 0  | 0  | 0  | 0 | -1 | -1 | 0         | 0                | -1      |
| AT3G59840 | 0  | 0  | -1 | 0  | 0 | 0  | 0  | 0         | 0                | -1      |
| AT3G59880 | 0  | 0  | 0  | 0  | 0 | 1  | 0  | 0         | 0                | 1       |
| AT3G59920 | 0  | 0  | 0  | 0  | 0 | 0  | 1  | 0         | 0                | 1       |
| AT3G59930 | 0  | 0  | 0  | 0  | 0 | -1 | -1 | 0         | 0                | -1      |
| AT3G59980 | 0  | 0  | 0  | 0  | 0 | 0  | -1 | 0         | 0                | -1      |
| AT3G60080 | 0  | 0  | 0  | 0  | 0 | 0  | -1 | 0         | 0                | -1      |
| AT3G60130 | 0  | 0  | 0  | 0  | 0 | 0  | 1  | 0         | 0                | 1       |
| AT3G60140 | 0  | 0  | 0  | 1  | 0 | 0  | 0  | 0         | 0                | 1       |
| AT3G60160 | 0  | 0  | -1 | 0  | 0 | 0  | 0  | 0         | 0                | -1      |
| AT3G60200 | 0  | 0  | 0  | 0  | 0 | 0  | -1 | 0         | 0                | -1      |
| AT3G60210 | 0  | 0  | 0  | 0  | 0 | 0  | -1 | 0         | 0                | -1      |
| AT3G60270 | 0  | 0  | 0  | 0  | 0 | 0  | 0  | 1         | 1                | 1       |
| AT3G60280 | 0  | 0  | 0  | -1 | 0 | -1 | 0  | 0         | 0                | -1      |

Appendix Table S1

| Name      | 1  | 2  | 3  | 4  | 5 | 6  | 7  | bes1D_Col | bes1Dpif45_pif45 | ALL_BES |
|-----------|----|----|----|----|---|----|----|-----------|------------------|---------|
| AT3G60330 | 0  | 0  | 0  | 0  | 0 | -1 | 0  | 0         | 0                | -1      |
| AT3G60370 | 0  | 0  | 0  | 0  | 0 | 0  | -1 | 0         | 0                | -1      |
| AT3G60390 | -1 | -1 | 0  | 0  | 0 | 0  | 0  | 0         | 0                | -1      |
| AT3G60480 | 0  | 0  | 0  | 0  | 0 | 0  | -1 | 0         | 0                | -1      |
| AT3G60490 | 0  | 0  | 0  | 0  | 0 | 0  | 1  | 0         | 0                | 1       |
| AT3G60530 | 0  | -1 | 0  | 0  | 0 | 0  | -1 | 0         | 0                | -1      |
| AT3G60690 | -1 | -1 | 0  | 0  | 0 | 0  | 0  | 0         | 0                | -1      |
| AT3G60700 | 0  | 0  | 0  | 0  | 0 | 1  | 0  | 0         | 0                | 1       |
| AT3G60780 | 0  | 0  | 0  | 0  | 0 | 1  | 0  | 0         | 0                | 1       |
| AT3G60840 | 0  | 0  | 0  | 0  | 0 | 1  | 0  | 0         | 0                | 1       |
| AT3G60910 | 0  | 0  | 0  | 0  | 0 | 0  | -1 | 0         | 0                | -1      |
| AT3G60980 | 0  | 0  | 0  | 0  | 0 | 0  | -1 | 0         | 0                | -1      |
| AT3G61028 | 0  | 0  | 0  | 0  | 0 | -1 | 0  | 0         | 0                | -1      |
| AT3G61080 | 0  | 0  | 0  | 0  | 0 | 0  | -1 | 0         | 0                | -1      |
| AT3G61160 | 0  | 0  | 0  | 0  | 0 | 0  | 1  | 0         | 0                | 1       |
| AT3G61260 | 0  | 0  | 0  | 0  | 0 | 0  | 1  | 0         | 0                | 1       |
| AT3G61310 | 0  | 0  | 0  | 0  | 0 | 0  | -1 | 0         | 0                | -1      |
| AT3G61390 | 0  | 0  | 0  | 0  | 0 | 1  | 0  | 0         | 0                | 1       |
| AT3G61430 | 0  | 0  | 0  | 0  | 0 | 0  | 1  | 0         | 0                | 1       |
| AT3G61460 | -1 | -1 | -1 | 0  | 0 | 0  | -1 | 0         | 0                | -1      |
| AT3G61470 | 0  | 0  | 0  | 0  | 0 | 0  | -1 | 0         | 0                | -1      |
| AT3G61490 | 0  | 0  | 0  | 0  | 0 | 0  | -1 | 0         | 0                | -1      |
| AT3G61510 | 0  | 0  | 0  | 0  | 0 | -1 | 0  | 0         | 0                | -1      |
| AT3G61550 | 1  | 1  | 1  | 0  | 0 | 0  | 0  | 0         | 0                | 1       |
| AT3G61580 | 0  | 0  | 0  | 0  | 0 | 0  | -1 | 0         | 0                | -1      |
| AT3G61590 | 0  | 0  | -1 | 0  | 0 | 0  | 0  | 0         | 0                | -1      |
| AT3G61620 | 0  | 0  | 0  | -1 | 0 | 0  | -1 | 0         | 0                | -1      |
| AT3G61640 | 0  | 0  | 0  | 0  | 0 | 0  | -1 | 0         | 0                | -1      |
| AT3G61790 | 0  | 0  | 0  | 0  | 0 | 0  | 1  | 0         | 0                | 1       |
| AT3G61810 | 0  | 0  | 0  | 0  | 0 | 1  | 0  | 0         | 0                | 1       |
| AT3G61820 | 0  | 0  | 0  | 0  | 0 | 1  | 0  | 0         | 0                | 1       |
| AT3G61870 | 0  | 0  | 0  | 0  | 0 | 0  | -1 | 0         | 0                | -1      |
| AT3G61990 | 0  | 0  | 0  | 0  | 0 | 0  | 1  | 0         | 0                | 1       |
| AT3G62000 | 0  | 0  | 0  | 0  | 0 | 0  | -1 | 0         | 0                | -1      |
| AT3G62030 | 0  | 0  | 0  | 0  | 0 | 0  | -1 | 0         | 0                | -1      |
| AT3G62070 | 0  | 0  | 0  | 0  | 0 | 1  | 0  | 0         | 0                | 1       |
| AT3G62130 | 0  | 0  | 0  | 0  | 0 | 0  | -1 | 0         | 0                | -1      |
| AT3G62160 | 0  | 0  | 0  | 0  | 0 | 1  | 0  | 0         | 0                | 1       |
| AT3G62280 | -1 | -1 | -1 | 0  | 0 | 0  | 0  | 0         | 0                | -1      |
| AT3G62410 | 0  | 0  | 0  | 0  | 0 | 0  | -1 | -1        | 0                | -1      |
| AT3G62550 | -1 | 0  | 0  | 0  | 0 | 0  | 0  | 0         | 0                | -1      |
| AT3G62590 | 0  | 0  | 0  | 0  | 0 | 1  | 0  | 0         | 0                | 1       |
| AT3G62600 | 0  | 0  | 0  | 0  | 0 | 0  | 1  | 0         | 0                | 1       |
| AT3G62660 | 0  | 1  | 0  | 0  | 0 | 0  | 0  | 0         | 0                | 1       |
| AT3G62680 | 0  | 0  | 0  | 0  | 0 | -1 | 0  | 0         | -1               | -1      |
| AT3G62720 | 1  | 1  | 0  | 0  | 0 | 0  | 0  | 0         | 0                | 1       |
| AT3G62760 | -1 | -1 | 0  | 0  | 0 | 0  | 0  | 0         | 0                | -1      |
| AT3G62820 | 0  | 0  | 0  | 0  | 0 | 0  | -1 | 0         | 0                | -1      |
| AT3G62860 | 0  | 0  | 0  | 0  | 0 | 0  | 1  | 0         | 0                | 1       |
| AT3G62880 | 0  | 0  | 0  | 0  | 0 | 0  | -1 | 0         | 0                | -1      |
| AT3G62980 | 0  | 0  | 0  | 0  | 0 | 0  | -1 | 0         | 0                | -1      |
| AT3G63000 | 0  | 0  | 0  | 0  | 0 | 0  | -1 | 0         | 0                | -1      |
| AT3G63088 | 0  | 0  | 0  | 0  | 0 | -1 | 0  | 0         | 0                | -1      |
| AT3G63140 | 0  | 0  | 0  | 0  | 0 | 0  | -1 | 0         | 0                | -1      |
| AT3G63160 | 0  | 0  | 0  | 0  | 0 | 0  | -1 | 0         | 0                | -1      |
| AT3G63170 | 0  | 0  | 0  | 0  | 0 | 0  | -1 | 0         | 0                | -1      |
| AT3G63200 | 0  | -1 | 0  | 0  | 0 | 0  | 0  | 0         | 0                | -1      |
| AT3G63210 | 0  | 0  | -1 | 0  | 0 | 0  | 0  | 0         | 0                | -1      |
| AT3G63220 | 0  | 0  | -1 | 0  | 0 | 0  | 0  | 0         | 0                | -1      |
| AT3G63410 | 0  | 0  | 0  | 0  | 0 | 0  | -1 | 0         | 0                | -1      |
| AT3G63470 | 0  | 0  | 0  | 0  | 0 | 1  | 1  | 0         | 0                | 1       |

Appendix Table S1

| Name      | 1  | 2  | 3  | 4  | 5  | 6  | 7  | bes1D_Col | bes1Dpif45_pif45 | ALL_BES |
|-----------|----|----|----|----|----|----|----|-----------|------------------|---------|
| AT3G63480 | 0  | 0  | 0  | 0  | 0  | 0  | 1  | 0         | 0                | 1       |
| AT3G63510 | 0  | 0  | -1 | 0  | 0  | 0  | 0  | 0         | 0                | -1      |
| AT4G00050 | 0  | 0  | 0  | 0  | 0  | 0  | 1  | 0         | 0                | 1       |
| AT4G00234 | 0  | 0  | 0  | 0  | 0  | 0  | 1  | 0         | 0                | 1       |
| AT4G00238 | 0  | 0  | 0  | 0  | 0  | 0  | -1 | 0         | 0                | -1      |
| AT4G00250 | 0  | 0  | 0  | 0  | 0  | 0  | -1 | 0         | 0                | -1      |
| AT4G00290 | 0  | 0  | 0  | 0  | 0  | 0  | 1  | 0         | 0                | 1       |
| AT4G00320 | 0  | 0  | 0  | 0  | 0  | 1  | 0  | 0         | 0                | 1       |
| AT4G00330 | 0  | 0  | 0  | 0  | 0  | 0  | 1  | 0         | 0                | 1       |
| AT4G00360 | 1  | 1  | 1  | 1  | 0  | 1  | 1  | 0         | 0                | 1       |
| AT4G00370 | 0  | 0  | 0  | 0  | 0  | 0  | 1  | 0         | 0                | 1       |
| AT4G00400 | 0  | 0  | 0  | 0  | 0  | 1  | 1  | 0         | 0                | 1       |
| AT4G00530 | 0  | 0  | 0  | 0  | 0  | 0  | -1 | 0         | 0                | -1      |
| AT4G00560 | 0  | 0  | 0  | 0  | 0  | 0  | -1 | 0         | 0                | -1      |
| AT4G00630 | 0  | -1 | 0  | 0  | 0  | 0  | 0  | 0         | 0                | -1      |
| AT4G00680 | 0  | 0  | 0  | 0  | 0  | -1 | 0  | 0         | 0                | -1      |
| AT4G00700 | 0  | 0  | 0  | 0  | 0  | 1  | 0  | 0         | 0                | 1       |
| AT4G00740 | 0  | 0  | 0  | 0  | 0  | 0  | 1  | 0         | 0                | 1       |
| AT4G00970 | 0  | 0  | 0  | 0  | 0  | 1  | 0  | 0         | 1                | 1       |
| AT4G00990 | 0  | 0  | -1 | 0  | 0  | 0  | 0  | 0         | 0                | -1      |
| AT4G01080 | 0  | 0  | 0  | 1  | 0  | 0  | 0  | 0         | 0                | 1       |
| AT4G01120 | 0  | 0  | 1  | 0  | 0  | 0  | 1  | 0         | 0                | 1       |
| AT4G01140 | 0  | 0  | 0  | 0  | 0  | 1  | 1  | 0         | 0                | 1       |
| AT4G01150 | 0  | 0  | 0  | 0  | 0  | 0  | -1 | 0         | 0                | -1      |
| AT4G01210 | 0  | 0  | 0  | 0  | 0  | 0  | 1  | 0         | 0                | 1       |
| AT4G01250 | 0  | 0  | 0  | 0  | 0  | 0  | -1 | 0         | 0                | -1      |
| AT4G01330 | 0  | 0  | 0  | 0  | 0  | 0  | -1 | 0         | 0                | -1      |
| AT4G01430 | 0  | 0  | 0  | 0  | 0  | 1  | 0  | 0         | 0                | 1       |
| AT4G01480 | 0  | 0  | 0  | 0  | 0  | 0  | 1  | 0         | 0                | 1       |
| AT4G01525 | 0  | 0  | 0  | 0  | 0  | -1 | 0  | 0         | 0                | -1      |
| AT4G01575 | 0  | 0  | 0  | 0  | 0  | 1  | 0  | 0         | 0                | 1       |
| AT4G01580 | 0  | 0  | 0  | 0  | 0  | 0  | -1 | 0         | 0                | -1      |
| AT4G01630 | 0  | 0  | 0  | -1 | 0  | 0  | 0  | 0         | -1               | -1      |
| AT4G01680 | -1 | -1 | -1 | -1 | -1 | -1 | -1 | 0         | -1               | -1      |
| AT4G01690 | 0  | 0  | 0  | 0  | 0  | 0  | -1 | 0         | 0                | -1      |
| AT4G01730 | 0  | 0  | 0  | 0  | 0  | 1  | 0  | 0         | 0                | 1       |
| AT4G01860 | 0  | 0  | 0  | 0  | 0  | 0  | -1 | 0         | 0                | -1      |
| AT4G01870 | -1 | -1 | 0  | -1 | 0  | -1 | 0  | 0         | 0                | -1      |
| AT4G01950 | 1  | 1  | 1  | 1  | 1  | 1  | 1  | 0         | 1                | 1       |
| AT4G01975 | 0  | 0  | 0  | 0  | 0  | 1  | 0  | 0         | 0                | 1       |
| AT4G02060 | 0  | 0  | 0  | 0  | 0  | 0  | 1  | 0         | 0                | 1       |
| AT4G02090 | 0  | 0  | 0  | 0  | 0  | 1  | 1  | 0         | 0                | 1       |
| AT4G02130 | 1  | 1  | 0  | 0  | 0  | 0  | 0  | 0         | 0                | 1       |
| AT4G02170 | 0  | 0  | 0  | 0  | 0  | 1  | 0  | 0         | 0                | 1       |
| AT4G02220 | 0  | 0  | -1 | 0  | 0  | 0  | 0  | 0         | 0                | -1      |
| AT4G02270 | 0  | 0  | 0  | 0  | 0  | -1 | 0  | 0         | -1               | -1      |
| AT4G02290 | 0  | 0  | 0  | 0  | 0  | 0  | 0  | 1         | 1                | 1       |
| AT4G02330 | 0  | 1  | 1  | 1  | 1  | 1  | 0  | 0         | 0                | 1       |
| AT4G02380 | 0  | 0  | 0  | 0  | 0  | -1 | -1 | 0         | 0                | -1      |
| AT4G02410 | 0  | 0  | 0  | 0  | 0  | 1  | 1  | 0         | 0                | 1       |
| AT4G02520 | 0  | 0  | 0  | 0  | 0  | 0  | 0  | 1         | 0                | 1       |
| AT4G02530 | 0  | 0  | 0  | 0  | 0  | 0  | -1 | 0         | 0                | -1      |
| AT4G02650 | 0  | 0  | 0  | 0  | 0  | -1 | 0  | 0         | 0                | -1      |
| AT4G02790 | 0  | 0  | 0  | 0  | 0  | 0  | -1 | -1        | 0                | -1      |
| AT4G02830 | 0  | 0  | 0  | 0  | 0  | 1  | 0  | 0         | 0                | 1       |
| AT4G02850 | -1 | 0  | 0  | 0  | 0  | 0  | 0  | 0         | 0                | -1      |
| AT4G02860 | 0  | -1 | -1 | 0  | 0  | 0  | 0  | 0         | 0                | -1      |
| AT4G02970 | 0  | 0  | 0  | 0  | 0  | -1 | 0  | 0         | 0                | -1      |
| AT4G03070 | 1  | 1  | 0  | 0  | 0  | 1  | 1  | 0         | 0                | 1       |
| AT4G03100 | 0  | 0  | 0  | 0  | 0  | 1  | 0  | 0         | 0                | 1       |
| AT4G03110 | 0  | 0  | 0  | 1  | 0  | 0  | 0  | 0         | 0                | 1       |

Appendix Table S1

| Name      | 1  | 2  | 3  | 4 | 5 | 6  | 7  | bes1D_Col | bes1Dpif45_pif45 | ALL_BES |
|-----------|----|----|----|---|---|----|----|-----------|------------------|---------|
| AT4G03140 | 1  | 0  | 1  | 0 | 0 | 0  | 0  | 0         | 0                | 1       |
| AT4G03150 | 0  | 0  | 0  | 0 | 0 | 0  | -1 | 0         | 0                | -1      |
| AT4G03156 | 0  | 0  | 0  | 0 | 0 | 1  | 0  | 0         | 0                | 1       |
| AT4G03210 | 0  | 0  | 0  | 0 | 0 | -1 | -1 | 0         | 0                | -1      |
| AT4G03280 | 0  | 0  | 0  | 0 | 0 | 0  | -1 | 0         | 0                | -1      |
| AT4G03330 | 0  | 0  | 0  | 0 | 0 | 1  | 1  | 0         | 0                | 1       |
| AT4G03340 | 0  | 0  | 0  | 0 | 0 | 0  | -1 | 0         | 0                | -1      |
| AT4G03390 | 0  | 0  | 0  | 0 | 0 | 0  | 1  | 0         | 0                | 1       |
| AT4G03400 | 1  | 1  | 1  | 1 | 0 | 0  | 0  | 0         | 0                | 1       |
| AT4G03420 | 0  | 0  | 0  | 1 | 0 | 0  | 0  | 0         | 0                | 1       |
| AT4G03470 | 0  | 0  | 0  | 0 | 0 | -1 | 0  | 0         | 0                | -1      |
| AT4G03820 | 0  | 0  | 0  | 0 | 0 | 0  | 1  | 0         | 0                | 1       |
| AT4G03950 | 0  | 0  | 0  | 0 | 0 | 1  | 0  | 1         | 0                | 1       |
| AT4G04330 | 0  | 0  | 0  | 0 | 0 | -1 | 0  | 0         | 0                | -1      |
| AT4G04410 | 0  | 0  | 0  | 0 | 0 | -1 | 0  | 0         | 0                | -1      |
| AT4G04420 | 0  | 0  | 0  | 0 | 0 | -1 | 0  | 0         | 0                | -1      |
| AT4G04423 | 0  | 0  | 0  | 0 | 0 | -1 | 0  | 0         | 0                | -1      |
| AT4G04450 | 0  | 0  | 0  | 0 | 0 | -1 | 0  | 0         | 0                | -1      |
| AT4G04610 | -1 | 0  | 0  | 0 | 0 | 0  | 0  | 0         | 0                | -1      |
| AT4G04630 | 0  | 1  | 0  | 0 | 0 | 0  | 0  | 0         | 0                | 1       |
| AT4G04640 | 0  | 0  | 0  | 0 | 0 | 0  | -1 | 0         | 0                | -1      |
| AT4G04770 | 0  | 0  | 0  | 1 | 0 | 0  | 0  | 0         | 0                | 1       |
| AT4G04840 | 0  | 0  | 0  | 0 | 0 | -1 | 0  | 0         | 0                | -1      |
| AT4G04850 | 0  | 0  | 0  | 0 | 0 | 0  | 0  | -1        | 0                | -1      |
| AT4G04955 | 0  | 0  | 0  | 0 | 0 | 0  | 1  | 0         | 0                | 1       |
| AT4G04990 | 0  | 0  | 0  | 0 | 0 | 1  | 0  | 1         | 1                | 1       |
| AT4G05100 | 0  | 0  | 0  | 0 | 0 | 0  | 1  | 0         | 0                | 1       |
| AT4G05170 | 0  | 0  | 0  | 0 | 0 | 1  | 1  | 0         | 0                | 1       |
| AT4G05180 | 0  | 0  | 0  | 0 | 0 | 0  | -1 | 0         | 0                | -1      |
| AT4G05190 | 0  | 0  | 0  | 0 | 0 | 1  | 1  | 0         | 0                | 1       |
| AT4G05410 | 0  | 0  | -1 | 0 | 0 | 0  | 0  | 0         | 0                | -1      |
| AT4G05460 | 0  | 0  | 0  | 0 | 0 | 0  | -1 | 0         | 0                | -1      |
| AT4G05520 | 0  | 0  | 0  | 0 | 0 | 1  | 0  | 0         | 0                | 1       |
| AT4G07400 | 0  | 0  | 0  | 0 | 0 | 0  | -1 | 0         | 0                | -1      |
| AT4G07812 | 0  | 0  | 0  | 0 | 0 | -1 | 0  | 0         | 0                | -1      |
| AT4G07950 | 0  | 0  | 0  | 0 | 0 | 0  | -1 | 0         | 0                | -1      |
| AT4G08040 | -1 | -1 | 0  | 0 | 0 | -1 | -1 | -1        | -1               | -1      |
| AT4G08150 | 0  | 0  | 0  | 0 | 0 | 0  | 1  | 0         | 0                | 1       |
| AT4G08240 | 0  | 0  | 0  | 0 | 0 | 0  | -1 | 0         | 0                | -1      |
| AT4G08280 | 0  | 0  | 0  | 0 | 0 | 0  | -1 | 0         | 0                | -1      |
| AT4G08290 | 0  | 0  | 0  | 0 | 0 | 0  | 1  | 0         | 0                | 1       |
| AT4G08300 | 0  | 0  | 0  | 0 | 0 | 0  | 1  | 0         | 0                | 1       |
| AT4G08360 | 0  | 0  | 0  | 0 | 0 | 1  | 0  | 0         | 1                | 1       |
| AT4G08400 | 0  | 0  | 0  | 0 | 0 | -1 | 0  | 0         | 0                | -1      |
| AT4G08410 | 0  | 0  | 0  | 0 | 0 | -1 | 0  | 0         | 0                | -1      |
| AT4G08620 | 0  | 1  | 0  | 0 | 0 | 0  | 0  | 0         | 0                | 1       |
| AT4G08780 | 0  | 0  | 0  | 0 | 0 | -1 | 0  | 0         | 0                | -1      |
| AT4G08870 | 0  | 0  | 0  | 0 | 0 | 0  | -1 | 0         | 0                | -1      |
| AT4G08900 | 0  | 0  | 0  | 0 | 0 | 0  | -1 | 0         | 0                | -1      |
| AT4G08950 | 1  | 1  | 1  | 1 | 1 | 0  | 0  | 0         | 0                | 1       |
| AT4G08980 | 0  | 0  | 0  | 0 | 0 | 0  | -1 | 0         | 0                | -1      |
| AT4G08990 | 0  | 0  | 0  | 0 | 0 | -1 | 0  | 0         | 0                | -1      |
| AT4G09010 | 0  | 0  | 0  | 0 | 0 | 0  | -1 | 0         | 0                | -1      |
| AT4G09110 | 0  | 0  | 0  | 0 | 0 | 1  | 0  | 0         | 0                | 1       |
| AT4G09380 | 0  | 0  | 0  | 0 | 0 | -1 | 0  | 0         | 0                | -1      |
| AT4G09420 | 0  | 0  | 0  | 0 | 0 | 1  | 0  | 0         | 0                | 1       |
| AT4G09460 | 1  | 1  | 1  | 0 | 0 | 0  | 0  | 0         | 0                | 1       |
| AT4G09550 | 0  | 0  | 0  | 0 | 0 | 0  | -1 | 0         | 0                | -1      |
| AT4G09580 | 0  | 0  | 0  | 0 | 0 | 0  | 1  | 0         | 0                | 1       |
| AT4G09600 | 0  | 0  | 0  | 0 | 0 | -1 | 0  | 0         | 0                | -1      |
| AT4G09620 | 0  | 0  | 0  | 0 | 0 | 0  | -1 | 0         | 0                | -1      |

Appendix Table S1

| Name      | 1  | 2  | 3  | 4 | 5 | 6  | 7  | bes1D_Col | bes1Dpif45_pif45 | ALL_BES |
|-----------|----|----|----|---|---|----|----|-----------|------------------|---------|
| AT4G09650 | 0  | 0  | 0  | 0 | 0 | 0  | -1 | 0         | 0                | -1      |
| AT4G09680 | 0  | 0  | -1 | 0 | 0 | 0  | 0  | 0         | 0                | -1      |
| AT4G09740 | 0  | 0  | 0  | 0 | 0 | 1  | 0  | 0         | 0                | 1       |
| AT4G09800 | 0  | 0  | 0  | 0 | 0 | 0  | -1 | 0         | 0                | -1      |
| AT4G09890 | 1  | 1  | 1  | 1 | 0 | 0  | 1  | 0         | 0                | 1       |
| AT4G10030 | 0  | 0  | 0  | 0 | 0 | 0  | -1 | 0         | 0                | -1      |
| AT4G10090 | 0  | 0  | 0  | 0 | 0 | 0  | -1 | 0         | 0                | -1      |
| AT4G10120 | 0  | 0  | 0  | 0 | 0 | 1  | 0  | 0         | 0                | 1       |
| AT4G10150 | 0  | 0  | 0  | 0 | 0 | 1  | 1  | 0         | 0                | 1       |
| AT4G10160 | 0  | 0  | 0  | 0 | 0 | 1  | 1  | 0         | 1                | 1       |
| AT4G10300 | 0  | 0  | 0  | 0 | 0 | 0  | -1 | 0         | 0                | -1      |
| AT4G10340 | 0  | 0  | 0  | 0 | 0 | 0  | -1 | 0         | 0                | -1      |
| AT4G10480 | 0  | 0  | 0  | 0 | 0 | 0  | -1 | 0         | 0                | -1      |
| AT4G10500 | 0  | 0  | 0  | 0 | 0 | 0  | 0  | 0         | 1                | 1       |
| AT4G10510 | 0  | 0  | 0  | 0 | 0 | 1  | 0  | 0         | 0                | 1       |
| AT4G10610 | 0  | 0  | 0  | 0 | 0 | 0  | -1 | 0         | 0                | -1      |
| AT4G10640 | 0  | 0  | 0  | 0 | 0 | -1 | 0  | 0         | 0                | -1      |
| AT4G10770 | 0  | 1  | 0  | 0 | 0 | 0  | 1  | 0         | 0                | 1       |
| AT4G10830 | 0  | 0  | 0  | 0 | 0 | 1  | 0  | 0         | 0                | 1       |
| AT4G10955 | 0  | 0  | 0  | 0 | 0 | 0  | 1  | 0         | 0                | 1       |
| AT4G10960 | 0  | 0  | 0  | 0 | 0 | 0  | 1  | 0         | 0                | 1       |
| AT4G11000 | 0  | 0  | 0  | 0 | 0 | 1  | 0  | 1         | 1                | 1       |
| AT4G11020 | 0  | 0  | 0  | 0 | 0 | 1  | 0  | 0         | 0                | 1       |
| AT4G11070 | 0  | 0  | 0  | 0 | 0 | 0  | 0  | 0         | 1                | 1       |
| AT4G11090 | 0  | 0  | -1 | 0 | 0 | 0  | 0  | 0         | 0                | -1      |
| AT4G11100 | 0  | 0  | 0  | 0 | 0 | 0  | -1 | 0         | 0                | -1      |
| AT4G11140 | 0  | 0  | 0  | 0 | 0 | -1 | 0  | 0         | 0                | -1      |
| AT4G11170 | 0  | 0  | 0  | 0 | 0 | 1  | 0  | 1         | 1                | 1       |
| AT4G11175 | 0  | 0  | 0  | 0 | 0 | 0  | -1 | 0         | 0                | -1      |
| AT4G11190 | 0  | 0  | 0  | 0 | 0 | 1  | 1  | 0         | 0                | 1       |
| AT4G11211 | 0  | 0  | 0  | 0 | 0 | 1  | 0  | 0         | 0                | 1       |
| AT4G11260 | 0  | 0  | 0  | 0 | 0 | 0  | 1  | 0         | 0                | 1       |
| AT4G11280 | 1  | 1  | 1  | 0 | 0 | 1  | 1  | 0         | 0                | 1       |
| AT4G11290 | 0  | 0  | 0  | 0 | 0 | 0  | 1  | 0         | 0                | 1       |
| AT4G11330 | 0  | 0  | 0  | 0 | 0 | 1  | 0  | 0         | 0                | 1       |
| AT4G11340 | 0  | 0  | 0  | 0 | 0 | 0  | 0  | 0         | 1                | 1       |
| AT4G11460 | 0  | 0  | 0  | 0 | 0 | -1 | 0  | 0         | 0                | -1      |
| AT4G11470 | 0  | 0  | 0  | 0 | 0 | 0  | 0  | 1         | 0                | 1       |
| AT4G11500 | 0  | 0  | 0  | 0 | 0 | 0  | 0  | 0         | 1                | 1       |
| AT4G11521 | 0  | 0  | 0  | 0 | 0 | 0  | 0  | 0         | 1                | 1       |
| AT4G11530 | 0  | 0  | 0  | 0 | 0 | 0  | 1  | 0         | 0                | 1       |
| AT4G11640 | 0  | 0  | 0  | 0 | 0 | 0  | -1 | 0         | 0                | -1      |
| AT4G11650 | 0  | 0  | 0  | 0 | 0 | 0  | 0  | 0         | 1                | 1       |
| AT4G11850 | 0  | 0  | 0  | 0 | 0 | 0  | 1  | 0         | 0                | 1       |
| AT4G11890 | 0  | 0  | 0  | 0 | 0 | 0  | 0  | 1         | 0                | 1       |
| AT4G12170 | 0  | 0  | 0  | 0 | 0 | -1 | 0  | 0         | 0                | -1      |
| AT4G12310 | 0  | 0  | 0  | 0 | 0 | 0  | -1 | 0         | 0                | -1      |
| AT4G12320 | 0  | 0  | 0  | 0 | 0 | 0  | -1 | 0         | 0                | -1      |
| AT4G12390 | -1 | -1 | 0  | 0 | 0 | 0  | 0  | 0         | 0                | -1      |
| AT4G12410 | 0  | 0  | 0  | 0 | 0 | -1 | 0  | -1        | -1               | -1      |
| AT4G12470 | 0  | 0  | 0  | 0 | 0 | 1  | 0  | 0         | 0                | 1       |
| AT4G12480 | 0  | 0  | 0  | 0 | 0 | 0  | 0  | 1         | 1                | 1       |
| AT4G12500 | 0  | 0  | 0  | 0 | 0 | 0  | 0  | 1         | 1                | 1       |
| AT4G12510 | 0  | 0  | 0  | 0 | 0 | 1  | 1  | 0         | 0                | 1       |
| AT4G12545 | 0  | 0  | 0  | 0 | 0 | -1 | 0  | 0         | 0                | -1      |
| AT4G12550 | 0  | 0  | 0  | 0 | 0 | -1 | 0  | -1        | -1               | -1      |
| AT4G12580 | 0  | 0  | 1  | 0 | 0 | 0  | 0  | 0         | 0                | 1       |
| AT4G12720 | 0  | 0  | 0  | 1 | 0 | 0  | 1  | 1         | 0                | 1       |
| AT4G12730 | 1  | 1  | 0  | 1 | 0 | 1  | 1  | 0         | 0                | 1       |
| AT4G12800 | 0  | 0  | 0  | 0 | 0 | 0  | -1 | 0         | 0                | -1      |
| AT4G12850 | 0  | 0  | 0  | 1 | 0 | 0  | 0  | 0         | 0                | 1       |

Appendix Table S1

| Name      | 1  | 2 | 3  | 4  | 5 | 6  | 7  | bes1D_Col | bes1Dpif45_pif45 | ALL_BES |
|-----------|----|---|----|----|---|----|----|-----------|------------------|---------|
| AT4G12970 | 0  | 0 | 0  | 0  | 0 | 0  | -1 | 0         | 0                | -1      |
| AT4G12980 | 0  | 0 | 0  | 0  | 0 | 0  | 1  | 0         | 0                | 1       |
| AT4G13000 | 0  | 0 | 0  | 1  | 0 | 0  | 0  | 0         | 0                | 1       |
| AT4G13030 | 0  | 0 | 0  | 0  | 0 | 0  | 1  | 0         | 0                | 1       |
| AT4G13090 | 0  | 0 | 0  | 0  | 0 | 0  | 0  | 0         | 1                | 1       |
| AT4G13095 | 0  | 0 | 0  | 0  | 0 | 0  | 0  | 0         | 1                | 1       |
| AT4G13220 | 0  | 0 | 0  | 0  | 0 | 0  | -1 | 0         | 0                | -1      |
| AT4G13250 | 0  | 0 | 0  | 0  | 0 | 0  | 1  | 0         | 0                | 1       |
| AT4G13290 | 0  | 0 | 0  | 1  | 0 | 0  | 0  | 0         | 0                | 1       |
| AT4G13300 | 0  | 0 | 0  | 0  | 0 | 1  | 0  | 0         | 1                | 1       |
| AT4G13310 | 0  | 0 | 0  | 1  | 0 | 0  | 0  | 0         | 0                | 1       |
| AT4G13340 | 1  | 1 | 1  | 1  | 0 | 0  | 0  | 0         | 0                | 1       |
| AT4G13500 | 0  | 0 | 0  | 0  | 0 | 0  | -1 | 0         | 0                | -1      |
| AT4G13510 | 0  | 0 | 0  | 1  | 0 | 0  | 0  | 0         | 0                | 1       |
| AT4G13580 | 0  | 0 | 0  | 0  | 0 | 1  | 1  | 0         | 0                | 1       |
| AT4G13590 | 0  | 0 | 0  | 0  | 0 | 0  | 1  | 0         | 0                | 1       |
| AT4G13640 | 0  | 0 | 0  | 0  | 0 | 0  | -1 | 0         | 0                | -1      |
| AT4G13660 | 0  | 0 | 0  | 0  | 0 | 0  | 1  | 0         | 0                | 1       |
| AT4G13700 | 0  | 0 | 0  | 1  | 0 | 0  | 0  | 0         | 0                | 1       |
| AT4G13710 | 0  | 0 | 0  | 0  | 0 | 0  | 1  | 0         | 0                | 1       |
| AT4G13720 | 0  | 0 | 0  | 0  | 0 | 0  | -1 | 0         | 0                | -1      |
| AT4G13770 | -1 | 0 | 0  | 0  | 0 | 0  | 0  | 0         | 0                | -1      |
| AT4G13790 | 0  | 0 | 0  | 1  | 0 | 0  | 1  | 0         | 0                | 1       |
| AT4G13860 | 0  | 0 | 0  | 0  | 0 | -1 | 0  | 0         | 0                | -1      |
| AT4G13890 | 0  | 0 | 0  | 1  | 0 | 1  | 0  | 0         | 0                | 1       |
| AT4G14000 | 0  | 0 | 0  | 0  | 0 | 0  | -1 | 0         | 0                | -1      |
| AT4G14096 | 0  | 0 | 0  | 0  | 0 | 0  | -1 | 0         | 0                | -1      |
| AT4G14100 | 0  | 0 | -1 | 0  | 0 | 0  | -1 | 0         | 0                | -1      |
| AT4G14103 | 0  | 0 | 0  | 0  | 0 | 0  | -1 | 0         | 0                | -1      |
| AT4G14140 | 0  | 0 | 0  | 0  | 0 | -1 | 0  | 0         | 0                | -1      |
| AT4G14210 | 0  | 0 | 0  | 0  | 0 | 0  | -1 | 0         | 0                | -1      |
| AT4G14270 | 0  | 0 | 0  | 0  | 0 | 0  | -1 | 0         | 0                | -1      |
| AT4G14300 | 0  | 0 | -1 | 0  | 0 | 0  | 0  | 0         | 0                | -1      |
| AT4G14330 | 0  | 0 | 0  | 0  | 0 | 1  | 0  | 0         | 0                | 1       |
| AT4G14360 | 0  | 0 | 1  | 0  | 0 | 0  | 0  | 0         | 0                | 1       |
| AT4G14365 | 0  | 0 | 0  | 0  | 1 | 1  | 0  | 1         | 1                | 1       |
| AT4G14370 | 0  | 0 | 0  | 0  | 0 | 1  | 0  | 0         | 0                | 1       |
| AT4G14385 | 0  | 0 | -1 | 0  | 0 | 0  | 0  | 0         | 0                | -1      |
| AT4G14390 | 0  | 0 | 0  | 1  | 0 | 0  | 0  | 0         | 0                | 1       |
| AT4G14400 | 0  | 0 | 0  | 1  | 0 | 0  | 0  | 0         | 0                | 1       |
| AT4G14430 | 0  | 0 | 0  | 0  | 0 | 0  | -1 | 0         | 0                | -1      |
| AT4G14440 | 0  | 0 | 0  | 1  | 0 | 0  | 0  | 0         | 0                | 1       |
| AT4G14465 | 0  | 0 | 0  | 0  | 0 | 0  | 1  | 0         | 0                | 1       |
| AT4G14550 | 0  | 0 | 0  | 0  | 0 | 0  | 1  | 0         | 0                | 1       |
| AT4G14580 | 0  | 0 | 0  | 0  | 0 | 1  | 0  | 0         | 0                | 1       |
| AT4G14615 | 0  | 0 | 0  | 0  | 0 | 0  | -1 | 0         | 0                | -1      |
| AT4G14630 | 0  | 0 | 0  | 0  | 0 | 0  | 0  | 1         | 1                | 1       |
| AT4G14640 | 0  | 0 | 0  | 1  | 0 | 1  | 0  | 0         | 1                | 1       |
| AT4G14660 | 0  | 0 | 0  | 0  | 0 | 0  | -1 | 0         | 0                | -1      |
| AT4G14680 | 1  | 0 | 0  | 0  | 0 | 0  | 0  | 0         | 0                | 1       |
| AT4G14690 | 0  | 0 | 0  | -1 | 0 | 0  | 0  | -1        | 0                | -1      |
| AT4G14720 | 0  | 0 | 0  | 0  | 0 | 0  | -1 | 0         | 0                | -1      |
| AT4G14746 | 0  | 0 | 0  | 0  | 0 | 1  | 0  | 0         | 0                | 1       |
| AT4G14750 | 0  | 0 | 1  | 0  | 0 | 0  | 1  | 0         | 0                | 1       |
| AT4G14790 | 0  | 0 | 0  | 0  | 0 | 1  | 0  | 0         | 0                | 1       |
| AT4G14870 | 0  | 0 | 0  | 0  | 0 | 0  | -1 | 0         | 0                | -1      |
| AT4G14890 | 0  | 0 | 0  | 0  | 0 | 0  | -1 | 0         | 0                | -1      |
| AT4G15093 | 0  | 0 | 0  | 0  | 0 | 0  | 1  | 0         | 0                | 1       |
| AT4G15110 | 0  | 0 | 0  | 0  | 0 | 0  | 0  | -1        | -1               | -1      |
| AT4G15230 | 0  | 0 | 0  | 0  | 0 | 0  | 0  | -1        | 0                | -1      |
| AT4G15393 | 0  | 0 | 0  | 0  | 0 | -1 | 0  | 0         | 0                | -1      |

Appendix Table S1

| Name      | 1  | 2  | 3  | 4  | 5 | 6  | 7  | bes1D_Col | bes1Dpif45_pif45 | ALL_BES |
|-----------|----|----|----|----|---|----|----|-----------|------------------|---------|
| AT4G15396 | 0  | 0  | 0  | 0  | 0 | -1 | 0  | 0         | 0                | -1      |
| AT4G15417 | 0  | 0  | 0  | 0  | 0 | 1  | 0  | 0         | 0                | 1       |
| AT4G15470 | 0  | 0  | 0  | 0  | 0 | 0  | 1  | 0         | 0                | 1       |
| AT4G15490 | 0  | 0  | 0  | 0  | 0 | -1 | 0  | 0         | 0                | -1      |
| AT4G15510 | 0  | 0  | 0  | 0  | 0 | 0  | -1 | 0         | 0                | -1      |
| AT4G15520 | 0  | 0  | 0  | 0  | 0 | 0  | -1 | 0         | 0                | -1      |
| AT4G15550 | -1 | -1 | 0  | -1 | 0 | 0  | 0  | 0         | 0                | -1      |
| AT4G15610 | 0  | 0  | 0  | 1  | 0 | 1  | 1  | 0         | 0                | 1       |
| AT4G15620 | 0  | 0  | 0  | 0  | 0 | -1 | 0  | 0         | 0                | -1      |
| AT4G15630 | 0  | 1  | 0  | 1  | 0 | 0  | 0  | 0         | 0                | 1       |
| AT4G15700 | 0  | 0  | 0  | 0  | 0 | 0  | -1 | 0         | 0                | -1      |
| AT4G15800 | 1  | 1  | 1  | 0  | 0 | 1  | 1  | 0         | 0                | 1       |
| AT4G15830 | 0  | 0  | 0  | 0  | 0 | 0  | 1  | 0         | 0                | 1       |
| AT4G15910 | 0  | 0  | 0  | 0  | 0 | -1 | -1 | 0         | 0                | -1      |
| AT4G16000 | 0  | 0  | 0  | 0  | 0 | 0  | 1  | 0         | 0                | 1       |
| AT4G16146 | 0  | 0  | -1 | 0  | 0 | 0  | 0  | 0         | 0                | -1      |
| AT4G16162 | 0  | 0  | 0  | 0  | 0 | 1  | 0  | 0         | 0                | 1       |
| AT4G16190 | 0  | 0  | 0  | 1  | 0 | 0  | 0  | 0         | 0                | 1       |
| AT4G16215 | 0  | 0  | 0  | 0  | 0 | 1  | 0  | 0         | 0                | 1       |
| AT4G16260 | 0  | 0  | 0  | 0  | 0 | 0  | 0  | 0         | 1                | 1       |
| AT4G16270 | 0  | 0  | 0  | 0  | 0 | -1 | 0  | 0         | 0                | -1      |
| AT4G16330 | 0  | 0  | 0  | 0  | 0 | 0  | -1 | 0         | 0                | -1      |
| AT4G16370 | -1 | 0  | 0  | -1 | 0 | 0  | -1 | 0         | 0                | -1      |
| AT4G16390 | 0  | 0  | 0  | 0  | 0 | 0  | -1 | 0         | 0                | -1      |
| AT4G16400 | 0  | 0  | 0  | 0  | 0 | 0  | -1 | 0         | 0                | -1      |
| AT4G16410 | 0  | 0  | 0  | 0  | 0 | 0  | -1 | 0         | 0                | -1      |
| AT4G16480 | 0  | 0  | 0  | 0  | 0 | 0  | -1 | 0         | 0                | -1      |
| AT4G16515 | 1  | 1  | 1  | 0  | 0 | 1  | 1  | 0         | 0                | 1       |
| AT4G16563 | 1  | 1  | 1  | 0  | 0 | 0  | 0  | 0         | 0                | 1       |
| AT4G16620 | 0  | 0  | 0  | 0  | 0 | 1  | 0  | 0         | 0                | 1       |
| AT4G16640 | 0  | 0  | 0  | 0  | 0 | 1  | 0  | 0         | 0                | 1       |
| AT4G16670 | 0  | -1 | -1 | 0  | 0 | 0  | 0  | 0         | 0                | -1      |
| AT4G16720 | 0  | 0  | 0  | 0  | 0 | 0  | -1 | 0         | 0                | -1      |
| AT4G16750 | 0  | 0  | 0  | 0  | 0 | 0  | -1 | 0         | 0                | -1      |
| AT4G16780 | 0  | -1 | 0  | 0  | 0 | 0  | 0  | 0         | 0                | -1      |
| AT4G16870 | 0  | 0  | 0  | 0  | 0 | 1  | 0  | 0         | 0                | 1       |
| AT4G16890 | 0  | 0  | 0  | 0  | 0 | 0  | -1 | 0         | 0                | -1      |
| AT4G16920 | 0  | 0  | 0  | 0  | 0 | 0  | -1 | 0         | 0                | -1      |
| AT4G17060 | 0  | 0  | 0  | 0  | 0 | 0  | -1 | 0         | 0                | -1      |
| AT4G17070 | 0  | 0  | 0  | 1  | 0 | 0  | 0  | 0         | 0                | 1       |
| AT4G17090 | 0  | 0  | 0  | 1  | 0 | 0  | 0  | 0         | 0                | 1       |
| AT4G17170 | 0  | 0  | 0  | 0  | 0 | 0  | 1  | 0         | 0                | 1       |
| AT4G17210 | 0  | 0  | 0  | 0  | 0 | 1  | 0  | 0         | 0                | 1       |
| AT4G17215 | 0  | 0  | 0  | 0  | 0 | 1  | 0  | 0         | 0                | 1       |
| AT4G17220 | 0  | 0  | 0  | 0  | 0 | 1  | 0  | 0         | 0                | 1       |
| AT4G17245 | 0  | 0  | 0  | 0  | 0 | 0  | -1 | 0         | 0                | -1      |
| AT4G17280 | 0  | 0  | 0  | 0  | 0 | 1  | 1  | 0         | 0                | 1       |
| AT4G17330 | 0  | 0  | 0  | 0  | 0 | 0  | 1  | 0         | 0                | 1       |
| AT4G17340 | 0  | 0  | 0  | 0  | 0 | 1  | 1  | 0         | 0                | 1       |
| AT4G17380 | 0  | 0  | 0  | 0  | 0 | 1  | 0  | 0         | 0                | 1       |
| AT4G17470 | 0  | 0  | 0  | 0  | 0 | 0  | 1  | 0         | 0                | 1       |
| AT4G17483 | 0  | 0  | 0  | 0  | 0 | 1  | 0  | 0         | 0                | 1       |
| AT4G17490 | 0  | 0  | 0  | 0  | 0 | 1  | 0  | 1         | 0                | 1       |
| AT4G17600 | 0  | 0  | 0  | 0  | 0 | 0  | -1 | 0         | 0                | -1      |
| AT4G17615 | 0  | 0  | 0  | 0  | 0 | 0  | 1  | 0         | 0                | 1       |
| AT4G17660 | 0  | 0  | 0  | 1  | 0 | 0  | 0  | 0         | 0                | 1       |
| AT4G17670 | 0  | 0  | 0  | 0  | 0 | 1  | 1  | 0         | 0                | 1       |
| AT4G17680 | 0  | 0  | 0  | 0  | 0 | 1  | 0  | 0         | 0                | 1       |
| AT4G17770 | 0  | 0  | 0  | 0  | 0 | 0  | 1  | 0         | 0                | 1       |
| AT4G17800 | 0  | 0  | 0  | 0  | 0 | 0  | 1  | 0         | 0                | 1       |
| AT4G17870 | 0  | 0  | 0  | 0  | 0 | 0  | 1  | 0         | 0                | 1       |

Appendix Table S1

| Name      | 1  | 2  | 3  | 4  | 5 | 6  | 7  | bes1D_Col | bes1Dpif45_pif45 | ALL_BES |
|-----------|----|----|----|----|---|----|----|-----------|------------------|---------|
| AT4G17940 | 0  | 0  | 0  | -1 | 0 | 0  | 0  | 0         | 0                | -1      |
| AT4G18010 | 0  | 0  | -1 | 0  | 0 | 0  | 0  | 0         | 0                | -1      |
| AT4G18030 | 0  | 1  | 1  | 0  | 0 | 0  | 1  | 0         | 0                | 1       |
| AT4G18130 | -1 | -1 | -1 | 0  | 0 | 0  | 0  | 0         | 0                | -1      |
| AT4G18170 | 0  | 0  | 0  | 0  | 0 | 1  | 0  | 0         | 0                | 1       |
| AT4G18195 | 0  | 0  | 0  | 0  | 0 | 0  | 0  | 1         | 0                | 1       |
| AT4G18197 | 0  | 0  | 0  | 0  | 0 | 1  | 0  | 1         | 0                | 1       |
| AT4G18205 | 0  | 0  | 0  | 0  | 0 | 1  | 0  | 1         | 0                | 1       |
| AT4G18230 | 0  | 0  | 0  | 0  | 0 | 0  | -1 | 0         | 0                | -1      |
| AT4G18250 | 0  | 0  | 0  | 0  | 0 | 0  | 0  | 1         | 1                | 1       |
| AT4G18280 | 0  | 0  | 0  | 0  | 0 | 1  | 1  | 0         | 0                | 1       |
| AT4G18370 | 0  | 0  | 0  | 0  | 0 | 0  | -1 | 0         | 0                | -1      |
| AT4G18390 | 0  | 0  | 0  | 0  | 0 | 0  | -1 | 0         | 0                | -1      |
| AT4G18400 | 0  | 0  | 0  | 0  | 0 | 0  | -1 | 0         | 0                | -1      |
| AT4G18425 | 0  | 0  | 0  | 0  | 0 | 1  | 1  | 0         | 1                | 1       |
| AT4G18430 | 0  | 0  | 0  | 1  | 0 | 1  | 1  | 1         | 0                | 1       |
| AT4G18480 | 0  | 0  | 0  | 0  | 0 | 0  | -1 | 0         | 0                | -1      |
| AT4G18510 | -1 | -1 | 0  | 0  | 0 | -1 | 0  | -1        | -1               | -1      |
| AT4G18520 | 0  | 0  | 0  | 0  | 0 | 0  | -1 | 0         | 0                | -1      |
| AT4G18530 | 0  | 0  | 0  | 0  | 0 | 0  | 1  | 0         | 0                | 1       |
| AT4G18550 | 0  | 0  | 0  | 0  | 0 | 1  | 1  | 0         | 1                | 1       |
| AT4G18610 | 0  | 0  | 0  | 0  | 0 | 0  | 1  | 0         | 0                | 1       |
| AT4G18640 | 0  | 0  | 0  | 0  | 0 | 0  | 1  | 0         | 0                | 1       |
| AT4G18910 | 0  | 0  | 0  | 1  | 0 | 0  | 1  | 0         | 0                | 1       |
| AT4G18930 | 0  | 0  | 0  | 0  | 0 | 0  | 1  | 0         | 0                | 1       |
| AT4G18970 | 1  | 1  | 1  | 1  | 0 | 1  | 1  | 0         | 0                | 1       |
| AT4G18990 | 0  | 0  | 0  | 0  | 0 | 0  | 0  | 0         | 1                | 1       |
| AT4G19030 | 0  | 0  | 0  | 0  | 0 | -1 | 0  | 0         | 0                | -1      |
| AT4G19120 | 1  | 1  | 0  | 1  | 0 | 0  | 1  | 0         | 0                | 1       |
| AT4G19370 | 0  | 0  | 0  | 0  | 0 | 1  | 0  | 1         | 1                | 1       |
| AT4G19380 | 0  | 1  | 0  | 0  | 0 | 1  | 1  | 0         | 0                | 1       |
| AT4G19410 | 0  | 0  | 0  | 0  | 0 | 0  | -1 | 0         | 0                | -1      |
| AT4G19420 | 1  | 1  | 0  | 1  | 0 | 0  | 1  | 0         | 0                | 1       |
| AT4G19530 | 0  | 0  | 0  | 0  | 0 | -1 | 0  | 0         | 0                | -1      |
| AT4G19540 | 0  | 0  | 0  | 0  | 0 | 0  | -1 | 0         | 0                | -1      |
| AT4G19670 | 0  | 0  | 0  | 0  | 0 | 0  | 1  | 0         | 0                | 1       |
| AT4G19680 | 0  | 0  | 0  | 0  | 0 | -1 | 0  | 0         | 0                | -1      |
| AT4G19720 | 0  | 0  | 0  | 1  | 0 | 0  | 0  | 0         | 0                | 1       |
| AT4G19750 | 0  | 0  | 0  | 1  | 0 | 0  | 0  | 0         | 0                | 1       |
| AT4G19760 | 0  | 0  | 0  | 1  | 0 | 0  | 0  | 0         | 0                | 1       |
| AT4G19820 | 0  | -1 | 0  | 0  | 0 | 0  | 0  | 0         | 0                | -1      |
| AT4G19830 | 0  | 0  | 0  | 0  | 0 | 0  | -1 | 0         | 0                | -1      |
| AT4G19860 | 0  | 0  | -1 | 0  | 0 | 0  | 0  | 0         | 0                | -1      |
| AT4G19865 | 0  | 0  | 0  | 0  | 0 | 0  | -1 | 0         | 0                | -1      |
| AT4G19960 | 0  | 0  | 0  | 0  | 0 | 1  | 0  | 0         | 0                | 1       |
| AT4G19985 | 0  | 0  | 0  | 0  | 0 | 0  | -1 | 0         | 0                | -1      |
| AT4G20000 | 0  | 0  | 0  | 0  | 0 | 0  | 0  | 1         | 0                | 1       |
| AT4G20030 | 0  | 0  | 0  | 0  | 0 | 0  | -1 | 0         | 0                | -1      |
| AT4G20070 | 0  | -1 | -1 | 0  | 0 | 0  | 0  | 0         | 0                | -1      |
| AT4G20110 | 0  | 0  | 0  | 0  | 0 | 0  | 1  | 0         | 0                | 1       |
| AT4G20170 | 0  | 1  | 0  | 1  | 0 | 0  | 0  | 0         | 0                | 1       |
| AT4G20210 | 0  | 0  | 0  | 0  | 0 | -1 | 0  | 0         | 0                | -1      |
| AT4G20260 | 0  | 0  | 0  | 1  | 0 | 1  | 1  | 0         | 0                | 1       |
| AT4G20270 | 0  | 0  | 0  | 0  | 0 | 0  | 1  | 0         | 0                | 1       |
| AT4G20320 | 0  | 0  | 0  | 0  | 0 | 0  | 1  | 0         | 0                | 1       |
| AT4G20360 | 0  | 0  | 0  | 0  | 0 | 0  | -1 | 0         | 0                | -1      |
| AT4G20362 | 0  | 0  | 0  | 0  | 0 | 1  | 0  | 0         | 0                | 1       |
| AT4G20390 | 0  | 0  | 0  | 0  | 0 | 0  | 0  | 1         | 1                | 1       |
| AT4G20780 | 1  | 1  | 0  | 0  | 0 | 1  | 1  | 1         | 0                | 1       |
| AT4G20820 | 0  | 0  | 0  | 0  | 0 | 1  | 1  | 0         | 0                | 1       |
| AT4G20860 | 0  | 0  | 0  | 1  | 0 | 1  | 0  | 0         | 0                | 1       |



Appendix Table S1

| Name      | 1  | 2  | 3 | 4  | 5 | 6  | 7  | bes1D_Col | bes1Dpif45_pif45 | ALL_BES |
|-----------|----|----|---|----|---|----|----|-----------|------------------|---------|
| AT4G20890 | 0  | 0  | 0 | 0  | 0 | 0  | 1  | 0         | 0                | 1       |
| AT4G21020 | 0  | 0  | 0 | 0  | 0 | -1 | 0  | 0         | 0                | -1      |
| AT4G21110 | 0  | 0  | 0 | 0  | 0 | 0  | -1 | 0         | 0                | -1      |
| AT4G21120 | 0  | 0  | 0 | 0  | 0 | 1  | 0  | 0         | 0                | 1       |
| AT4G21200 | 0  | 0  | 0 | 1  | 0 | 0  | 0  | 0         | 1                | 1       |
| AT4G21240 | 0  | 0  | 0 | 1  | 0 | 0  | 0  | 0         | 0                | 1       |
| AT4G21270 | 0  | 0  | 0 | 0  | 0 | 1  | 0  | 0         | 0                | 1       |
| AT4G21280 | 0  | 0  | 0 | 0  | 0 | 0  | -1 | 0         | 0                | -1      |
| AT4G21340 | 0  | 0  | 0 | 0  | 0 | 1  | 0  | 0         | 0                | 1       |
| AT4G21380 | 0  | 0  | 0 | 1  | 0 | 1  | 0  | 1         | 0                | 1       |
| AT4G21390 | 0  | 0  | 0 | 0  | 0 | 1  | 1  | 1         | 1                | 1       |
| AT4G21480 | 0  | 0  | 0 | 0  | 0 | 0  | -1 | 0         | 0                | -1      |
| AT4G21490 | 0  | 0  | 0 | 0  | 0 | 1  | 0  | 0         | 0                | 1       |
| AT4G21510 | 0  | 0  | 0 | 0  | 0 | 0  | -1 | 0         | 0                | -1      |
| AT4G21600 | 0  | 0  | 0 | 0  | 0 | 0  | 1  | 0         | 0                | 1       |
| AT4G21610 | 0  | 0  | 0 | 0  | 0 | 0  | -1 | 0         | 0                | -1      |
| AT4G21620 | 0  | 0  | 0 | 1  | 0 | 0  | 0  | 0         | 0                | 1       |
| AT4G21650 | 0  | 0  | 0 | 0  | 0 | -1 | 0  | 0         | 0                | -1      |
| AT4G21740 | 0  | 0  | 0 | 0  | 0 | 1  | 0  | 0         | 0                | 1       |
| AT4G21745 | 0  | 0  | 0 | 0  | 0 | 1  | 0  | 0         | 0                | 1       |
| AT4G21800 | 0  | 0  | 0 | 0  | 0 | 0  | 1  | 0         | 0                | 1       |
| AT4G21830 | 0  | 0  | 0 | 1  | 0 | 1  | 1  | 0         | 0                | 1       |
| AT4G21840 | 0  | 0  | 0 | 0  | 0 | 1  | 1  | 1         | 0                | 1       |
| AT4G21850 | 1  | 1  | 0 | 1  | 0 | 1  | 1  | 0         | 1                | 1       |
| AT4G21860 | 0  | 0  | 0 | 0  | 0 | 0  | -1 | 0         | 0                | -1      |
| AT4G21903 | 0  | 0  | 0 | 0  | 0 | 0  | 0  | 1         | 0                | 1       |
| AT4G21960 | 0  | 0  | 0 | 0  | 0 | 0  | 1  | 0         | 0                | 1       |
| AT4G21990 | 0  | -1 | 0 | 0  | 0 | 0  | 0  | 0         | 0                | -1      |
| AT4G22010 | 0  | 1  | 1 | 0  | 0 | 0  | 1  | 0         | 0                | 1       |
| AT4G22080 | 0  | 0  | 0 | 0  | 0 | -1 | 0  | 0         | 0                | -1      |
| AT4G22160 | 0  | 0  | 0 | 0  | 0 | 0  | -1 | 0         | 0                | -1      |
| AT4G22190 | 0  | 0  | 0 | 0  | 0 | 0  | -1 | 0         | 0                | -1      |
| AT4G22200 | -1 | -1 | 0 | -1 | 0 | 0  | 0  | 0         | 0                | -1      |
| AT4G22212 | 0  | 0  | 0 | 0  | 0 | -1 | 0  | 0         | 0                | -1      |
| AT4G22214 | 0  | 0  | 0 | 0  | 0 | -1 | 0  | 0         | 0                | -1      |
| AT4G22230 | 0  | 0  | 0 | 0  | 0 | -1 | 0  | 0         | 0                | -1      |
| AT4G22460 | 0  | 0  | 0 | 0  | 0 | 1  | 1  | 0         | 0                | 1       |
| AT4G22470 | -1 | -1 | 0 | 0  | 0 | 0  | 0  | 0         | 0                | -1      |
| AT4G22485 | 0  | 0  | 0 | 0  | 0 | -1 | 0  | 0         | 0                | -1      |
| AT4G22505 | 0  | 0  | 0 | 0  | 0 | -1 | 0  | 0         | 0                | -1      |
| AT4G22530 | 0  | 0  | 0 | 0  | 0 | 0  | 0  | 0         | 1                | 1       |
| AT4G22590 | 0  | 1  | 0 | 0  | 0 | 0  | 0  | 1         | 0                | 1       |
| AT4G22620 | 0  | 0  | 0 | 0  | 0 | 0  | 0  | 0         | -1               | -1      |
| AT4G22640 | 0  | 0  | 0 | 0  | 0 | 0  | 0  | 0         | 1                | 1       |
| AT4G22666 | 0  | 0  | 0 | 0  | 0 | -1 | 0  | 0         | 0                | -1      |
| AT4G22690 | 0  | 0  | 0 | 0  | 0 | 1  | 0  | 1         | 0                | 1       |
| AT4G22710 | 0  | 0  | 0 | 0  | 0 | 1  | 0  | 1         | 0                | 1       |
| AT4G22730 | 0  | 1  | 0 | 0  | 0 | 1  | 0  | 0         | 0                | 1       |
| AT4G22753 | 0  | 0  | 0 | 0  | 0 | 1  | 0  | 0         | 0                | 1       |
| AT4G22780 | 0  | 1  | 0 | 0  | 0 | 0  | 1  | 0         | 0                | 1       |
| AT4G22810 | 0  | 0  | 0 | 0  | 0 | 1  | 0  | 0         | 0                | 1       |
| AT4G22820 | 0  | 0  | 0 | 0  | 0 | 0  | 1  | 0         | 0                | 1       |
| AT4G22890 | 0  | 0  | 0 | 0  | 0 | 0  | -1 | 0         | 0                | -1      |
| AT4G22920 | 0  | 0  | 0 | 0  | 0 | 0  | 1  | 0         | 0                | 1       |
| AT4G22930 | 0  | 0  | 0 | 0  | 0 | 0  | -1 | 0         | 0                | -1      |
| AT4G23010 | 0  | 0  | 0 | 1  | 0 | 0  | 0  | 0         | 0                | 1       |
| AT4G23030 | 0  | 1  | 0 | 0  | 0 | 0  | 0  | 0         | 0                | 1       |
| AT4G23070 | 1  | 1  | 0 | 0  | 0 | 0  | 0  | 0         | 0                | 1       |
| AT4G23100 | 0  | 0  | 0 | 0  | 0 | 0  | 1  | 0         | 0                | 1       |
| AT4G23130 | 0  | 0  | 0 | 1  | 0 | 0  | 0  | 0         | 0                | 1       |
| AT4G23150 | 0  | 0  | 0 | 1  | 0 | 0  | 0  | 0         | 0                | 1       |

Appendix Table S1

| Name      | 1  | 2 | 3  | 4  | 5 | 6  | 7  | bes1D_Col | bes1Dpif45_pif45 | ALL_BES |
|-----------|----|---|----|----|---|----|----|-----------|------------------|---------|
| AT4G23170 | 0  | 0 | 0  | 0  | 0 | 0  | 0  | 1         | 1                | 1       |
| AT4G23180 | 1  | 1 | 0  | 0  | 0 | 1  | 0  | 1         | 0                | 1       |
| AT4G23190 | 0  | 0 | 0  | 0  | 0 | 1  | 0  | 1         | 0                | 1       |
| AT4G23210 | 0  | 0 | 0  | 1  | 0 | 0  | 0  | 0         | 0                | 1       |
| AT4G23215 | 0  | 0 | 0  | 0  | 0 | 0  | 0  | 0         | 1                | 1       |
| AT4G23220 | 0  | 0 | 0  | 0  | 0 | 0  | 0  | 0         | 1                | 1       |
| AT4G23240 | 0  | 0 | 0  | 0  | 0 | 1  | 0  | 0         | 0                | 1       |
| AT4G23250 | 0  | 0 | 0  | 1  | 0 | 0  | 0  | 0         | 0                | 1       |
| AT4G23270 | 0  | 0 | 0  | 0  | 0 | 0  | 1  | 0         | 0                | 1       |
| AT4G23280 | 0  | 0 | 0  | 0  | 0 | 0  | 0  | 1         | 0                | 1       |
| AT4G23290 | 1  | 1 | 0  | 0  | 0 | 0  | 0  | 0         | 0                | 1       |
| AT4G23400 | 0  | 0 | 0  | 0  | 0 | 0  | 1  | 0         | 0                | 1       |
| AT4G23450 | 0  | 0 | 0  | 0  | 0 | 1  | 1  | 0         | 0                | 1       |
| AT4G23560 | 0  | 0 | 0  | 0  | 0 | 1  | 0  | 1         | 0                | 1       |
| AT4G23590 | 0  | 0 | 0  | 0  | 0 | -1 | 0  | 0         | 0                | -1      |
| AT4G23620 | 0  | 0 | -1 | 0  | 0 | 0  | 0  | 0         | 0                | -1      |
| AT4G23670 | 0  | 0 | 0  | 0  | 0 | 0  | 1  | 0         | 0                | 1       |
| AT4G23690 | 0  | 0 | 0  | 0  | 0 | 0  | 1  | 0         | 0                | 1       |
| AT4G23700 | 0  | 0 | 0  | 0  | 0 | 1  | 0  | 0         | 0                | 1       |
| AT4G23710 | 0  | 0 | 0  | 0  | 0 | 0  | 1  | 0         | 0                | 1       |
| AT4G23810 | 0  | 0 | 0  | 1  | 0 | 1  | 0  | 1         | 0                | 1       |
| AT4G23840 | 0  | 0 | 0  | 0  | 0 | 0  | -1 | 0         | 0                | -1      |
| AT4G23885 | 0  | 0 | 0  | 0  | 0 | 0  | 1  | 0         | 0                | 1       |
| AT4G23940 | 0  | 0 | 0  | -1 | 0 | 0  | 0  | 0         | 0                | -1      |
| AT4G24040 | 0  | 0 | 0  | -1 | 0 | 0  | 0  | 0         | 0                | -1      |
| AT4G24120 | 0  | 0 | 0  | 1  | 0 | 0  | 0  | 0         | 0                | 1       |
| AT4G24140 | 0  | 0 | 0  | 0  | 0 | 0  | 0  | 0         | 1                | 1       |
| AT4G24150 | 0  | 0 | 0  | 0  | 0 | 1  | 0  | 0         | 0                | 1       |
| AT4G24160 | 0  | 0 | 0  | 0  | 0 | 0  | 0  | 0         | 1                | 1       |
| AT4G24180 | 0  | 0 | 0  | 0  | 0 | 1  | 0  | 0         | 0                | 1       |
| AT4G24265 | 0  | 0 | 0  | 0  | 0 | 1  | 0  | 0         | 0                | 1       |
| AT4G24290 | 0  | 0 | 0  | 0  | 0 | 0  | 1  | 0         | 0                | 1       |
| AT4G24340 | 0  | 0 | 0  | 0  | 0 | -1 | 0  | 0         | 0                | -1      |
| AT4G24350 | 0  | 0 | 0  | 0  | 0 | 0  | 0  | -1        | 0                | -1      |
| AT4G24450 | 0  | 0 | 0  | 0  | 0 | -1 | 0  | 0         | 0                | -1      |
| AT4G24510 | 1  | 1 | 1  | 1  | 0 | 0  | 0  | 0         | 0                | 1       |
| AT4G24570 | 1  | 1 | 0  | 0  | 0 | 1  | 0  | 0         | 0                | 1       |
| AT4G24630 | 0  | 0 | 0  | 0  | 0 | 0  | 1  | 0         | 0                | 1       |
| AT4G24660 | 0  | 0 | 0  | 0  | 0 | 0  | -1 | 0         | 0                | -1      |
| AT4G24730 | 0  | 0 | 0  | 0  | 0 | 0  | -1 | 0         | 0                | -1      |
| AT4G24750 | 0  | 0 | 0  | 0  | 0 | 0  | -1 | 0         | 0                | -1      |
| AT4G24760 | 0  | 1 | 0  | 0  | 0 | 0  | 1  | 0         | 0                | 1       |
| AT4G24770 | 0  | 0 | 0  | 0  | 0 | 0  | -1 | 0         | 0                | -1      |
| AT4G24790 | -1 | 0 | 0  | 0  | 0 | 0  | 0  | 0         | 0                | -1      |
| AT4G24970 | 0  | 0 | 0  | 1  | 0 | 0  | 0  | 0         | 0                | 1       |
| AT4G25050 | 0  | 0 | 0  | 0  | 0 | 0  | -1 | 0         | 0                | -1      |
| AT4G25080 | 0  | 0 | 0  | 0  | 0 | 0  | -1 | 0         | 0                | -1      |
| AT4G25100 | 0  | 0 | 0  | 0  | 0 | -1 | 0  | 0         | 0                | -1      |
| AT4G25110 | 0  | 0 | 0  | 0  | 0 | 0  | 0  | 1         | 0                | 1       |
| AT4G25140 | 0  | 0 | 0  | 0  | 0 | -1 | 0  | 0         | 0                | -1      |
| AT4G25200 | 0  | 0 | 0  | 0  | 0 | 0  | 0  | 0         | 1                | 1       |
| AT4G25220 | 0  | 0 | 0  | 0  | 0 | -1 | 0  | 0         | 0                | -1      |
| AT4G25240 | 0  | 0 | -1 | 0  | 0 | 0  | 0  | 0         | 0                | -1      |
| AT4G25250 | 0  | 1 | 0  | 0  | 0 | 0  | 0  | 0         | 0                | 1       |
| AT4G25260 | 1  | 0 | 0  | 1  | 0 | 0  | 1  | 0         | 0                | 1       |
| AT4G25410 | 0  | 0 | 0  | 0  | 0 | -1 | 0  | 0         | 0                | -1      |
| AT4G25420 | 0  | 0 | 0  | 0  | 0 | 1  | 1  | 0         | 0                | 1       |
| AT4G25433 | 0  | 0 | 0  | 0  | 0 | 0  | 0  | -1        | 0                | -1      |
| AT4G25450 | 0  | 0 | 0  | 0  | 0 | 0  | -1 | 0         | 0                | -1      |
| AT4G25470 | 0  | 0 | 0  | 0  | 0 | 0  | -1 | 0         | 0                | -1      |
| AT4G25500 | 0  | 0 | 0  | 0  | 0 | 0  | -1 | 0         | 0                | -1      |

Appendix Table S1

| Name      | 1  | 2  | 3  | 4  | 5 | 6  | 7  | bes1D_Col | bes1Dpif45_pif45 | ALL_BES |
|-----------|----|----|----|----|---|----|----|-----------|------------------|---------|
| AT4G25560 | 0  | 0  | 0  | 0  | 0 | 0  | 0  | 1         | 1                | 1       |
| AT4G25620 | 0  | -1 | -1 | 0  | 0 | 0  | 0  | 0         | 0                | -1      |
| AT4G25650 | 0  | 0  | 0  | 0  | 0 | 0  | -1 | 0         | 0                | -1      |
| AT4G25680 | 0  | 0  | 0  | 0  | 0 | 0  | 1  | 0         | 0                | 1       |
| AT4G25700 | 0  | 0  | -1 | 0  | 0 | 0  | -1 | 0         | 0                | -1      |
| AT4G25720 | 0  | 0  | 0  | 0  | 0 | 0  | 1  | 0         | 0                | 1       |
| AT4G25740 | 0  | 0  | 0  | 0  | 0 | 0  | -1 | 0         | 0                | -1      |
| AT4G25780 | -1 | -1 | -1 | 0  | 0 | 0  | 0  | 0         | 0                | -1      |
| AT4G25810 | 1  | 1  | 1  | 1  | 0 | 1  | 0  | 0         | 0                | 1       |
| AT4G25820 | 0  | 0  | 0  | 0  | 0 | 1  | 0  | 0         | 0                | 1       |
| AT4G25830 | 0  | 1  | 0  | 0  | 0 | 0  | 1  | 0         | 0                | 1       |
| AT4G25900 | 0  | 0  | 0  | 0  | 0 | 0  | 1  | 0         | 0                | 1       |
| AT4G25910 | 0  | 0  | 0  | 0  | 0 | 0  | -1 | 0         | 0                | -1      |
| AT4G26010 | 0  | 0  | 0  | 0  | 0 | -1 | 0  | 0         | 0                | -1      |
| AT4G26050 | 0  | 0  | 0  | 0  | 0 | 1  | 0  | 0         | 0                | 1       |
| AT4G26140 | 0  | 0  | 0  | 0  | 0 | 0  | 1  | 0         | 0                | 1       |
| AT4G26150 | 0  | 0  | 0  | 0  | 0 | 0  | 0  | -1        | 0                | -1      |
| AT4G26220 | 0  | 0  | 0  | 0  | 0 | -1 | 0  | 0         | 0                | -1      |
| AT4G26250 | 0  | 0  | 0  | 1  | 0 | 0  | 0  | 0         | 0                | 1       |
| AT4G26260 | 1  | 0  | 0  | 0  | 0 | 0  | 0  | 1         | 1                | 1       |
| AT4G26320 | 0  | 1  | 0  | 0  | 0 | 1  | 1  | 0         | 1                | 1       |
| AT4G26390 | 0  | 0  | 0  | 0  | 0 | 0  | -1 | 0         | 0                | -1      |
| AT4G26400 | 0  | 0  | 0  | 0  | 0 | 0  | -1 | 0         | 0                | -1      |
| AT4G26480 | 0  | 0  | 0  | 0  | 0 | 0  | -1 | 0         | 0                | -1      |
| AT4G26490 | 0  | 1  | 0  | 0  | 0 | 0  | 0  | 0         | 0                | 1       |
| AT4G26520 | 0  | 0  | 0  | 0  | 0 | 0  | -1 | 0         | 0                | -1      |
| AT4G26530 | -1 | 0  | 0  | 0  | 0 | 0  | 0  | 0         | 0                | -1      |
| AT4G26555 | 0  | 0  | 0  | 0  | 0 | 0  | -1 | 0         | 0                | -1      |
| AT4G26660 | 0  | 0  | 0  | 0  | 0 | 1  | 0  | 0         | 0                | 1       |
| AT4G26670 | 0  | 0  | 0  | 0  | 0 | 0  | -1 | 0         | 0                | -1      |
| AT4G26690 | 1  | 1  | 0  | 0  | 0 | 0  | 1  | 0         | 0                | 1       |
| AT4G26940 | 0  | 0  | 0  | 0  | 0 | 0  | 1  | 0         | 0                | 1       |
| AT4G26950 | 0  | 0  | 0  | 1  | 0 | 0  | 0  | 0         | 0                | 1       |
| AT4G27120 | 0  | 0  | -1 | 0  | 0 | 0  | 0  | 0         | 0                | -1      |
| AT4G27150 | 0  | 0  | 0  | 0  | 0 | -1 | 0  | 0         | 0                | -1      |
| AT4G27160 | 0  | 0  | 0  | 0  | 0 | 0  | 0  | 0         | -1               | -1      |
| AT4G27170 | 0  | 0  | 0  | -1 | 0 | 0  | 0  | 0         | 0                | -1      |
| AT4G27180 | 0  | 0  | 0  | 0  | 0 | 0  | 1  | 0         | 0                | 1       |
| AT4G27240 | 0  | 0  | 0  | 0  | 0 | 0  | -1 | 0         | 0                | -1      |
| AT4G27260 | -1 | -1 | -1 | 0  | 0 | 0  | -1 | 0         | 0                | -1      |
| AT4G27280 | 0  | 0  | 1  | 1  | 0 | 0  | 0  | 0         | 0                | 1       |
| AT4G27300 | 0  | 0  | 0  | 0  | 0 | 1  | 0  | 1         | 1                | 1       |
| AT4G27410 | -1 | -1 | -1 | 0  | 0 | 0  | -1 | 0         | 0                | -1      |
| AT4G27430 | 0  | 1  | 0  | 0  | 0 | 0  | 1  | 0         | 0                | 1       |
| AT4G27450 | 0  | 0  | 0  | -1 | 0 | 0  | 0  | 0         | 0                | -1      |
| AT4G27520 | 0  | -1 | 0  | 0  | 0 | 0  | -1 | 0         | 0                | -1      |
| AT4G27590 | 0  | 0  | 0  | 0  | 0 | 1  | 0  | 0         | 0                | 1       |
| AT4G27600 | 0  | 0  | 0  | 0  | 0 | 0  | -1 | 0         | 0                | -1      |
| AT4G27657 | 0  | 0  | 0  | 0  | 0 | 0  | -1 | 0         | 0                | -1      |
| AT4G27700 | 0  | 0  | 0  | 0  | 0 | 0  | 0  | -1        | 0                | -1      |
| AT4G27710 | 0  | 0  | 0  | -1 | 0 | 0  | 0  | 0         | 0                | -1      |
| AT4G27720 | 1  | 1  | 0  | 1  | 0 | 0  | 0  | 0         | 0                | 1       |
| AT4G27750 | 0  | 0  | 0  | 0  | 0 | 0  | -1 | 0         | 0                | -1      |
| AT4G27800 | 0  | 0  | 0  | 0  | 0 | 0  | -1 | 0         | 0                | -1      |
| AT4G27860 | 0  | 0  | 0  | 0  | 0 | 0  | 1  | 0         | 0                | 1       |
| AT4G27950 | 0  | 0  | 0  | 0  | 0 | -1 | 0  | 0         | 0                | -1      |
| AT4G27970 | 1  | 1  | 1  | 0  | 0 | 0  | 0  | 0         | 0                | 1       |
| AT4G28085 | 0  | 0  | 0  | 0  | 0 | 1  | 0  | 1         | 0                | 1       |
| AT4G28170 | 0  | 0  | 0  | 0  | 0 | -1 | 0  | 0         | 0                | -1      |
| AT4G28180 | 0  | 0  | 0  | 0  | 0 | 0  | -1 | 0         | 0                | -1      |
| AT4G28190 | 0  | 0  | 0  | 0  | 0 | -1 | -1 | 0         | 0                | -1      |

Appendix Table S1

| Name      | 1  | 2  | 3  | 4  | 5 | 6  | 7  | bes1D_Col | bes1Dpif45_pif45 | ALL_BES |
|-----------|----|----|----|----|---|----|----|-----------|------------------|---------|
| AT4G28210 | 0  | 0  | 0  | 0  | 0 | 0  | -1 | 0         | 0                | -1      |
| AT4G28230 | 0  | 0  | 0  | 0  | 0 | 1  | 1  | 0         | 0                | 1       |
| AT4G28240 | -1 | -1 | -1 | 0  | 0 | 0  | -1 | 0         | 0                | -1      |
| AT4G28270 | 1  | 0  | 0  | 1  | 0 | 0  | 0  | 0         | 0                | 1       |
| AT4G28350 | 0  | 0  | 0  | 0  | 0 | 1  | 0  | 0         | 0                | 1       |
| AT4G28460 | 0  | 0  | 0  | 0  | 0 | 1  | 0  | 1         | 1                | 1       |
| AT4G28490 | 0  | 0  | 0  | 0  | 0 | 1  | 0  | 0         | 0                | 1       |
| AT4G28520 | 0  | 0  | 0  | -1 | 0 | -1 | 0  | 0         | 0                | -1      |
| AT4G28530 | 0  | 0  | 0  | 0  | 0 | 1  | 1  | 0         | 0                | 1       |
| AT4G28610 | 0  | 0  | -1 | 0  | 0 | 0  | 0  | 0         | 0                | -1      |
| AT4G28660 | 0  | 0  | 0  | 0  | 0 | 0  | -1 | -1        | 0                | -1      |
| AT4G28703 | 0  | 0  | 0  | 0  | 0 | 0  | -1 | 0         | 0                | -1      |
| AT4G28706 | 0  | 0  | 0  | 0  | 0 | 0  | -1 | 0         | 0                | -1      |
| AT4G28740 | 0  | 0  | 0  | 0  | 0 | 0  | -1 | 0         | 0                | -1      |
| AT4G28750 | 0  | 0  | 0  | 0  | 0 | 0  | -1 | 0         | 0                | -1      |
| AT4G28770 | 0  | 0  | 0  | 0  | 0 | 0  | 1  | 0         | 0                | 1       |
| AT4G28830 | 0  | 0  | 0  | 0  | 0 | 0  | -1 | 0         | 0                | -1      |
| AT4G28840 | 0  | 0  | 0  | 0  | 0 | -1 | 0  | 0         | 0                | -1      |
| AT4G28850 | 0  | 0  | 0  | 0  | 0 | -1 | 0  | 0         | 0                | -1      |
| AT4G28890 | 0  | 0  | 0  | 0  | 0 | 0  | 1  | 0         | 0                | 1       |
| AT4G28900 | 0  | 0  | 0  | 0  | 0 | 1  | 0  | 0         | 0                | 1       |
| AT4G29020 | 0  | 0  | 0  | 1  | 0 | 0  | 1  | 0         | 0                | 1       |
| AT4G29030 | 0  | 0  | 0  | 0  | 0 | 0  | -1 | 0         | 0                | -1      |
| AT4G29050 | 0  | 0  | 0  | 0  | 0 | 1  | 0  | 0         | 0                | 1       |
| AT4G29070 | -1 | -1 | 0  | 0  | 0 | 0  | 0  | 0         | 0                | -1      |
| AT4G29080 | 0  | 0  | 0  | 0  | 0 | -1 | -1 | 0         | 0                | -1      |
| AT4G29140 | 0  | 0  | 0  | 0  | 0 | 0  | -1 | 0         | 0                | -1      |
| AT4G29210 | 0  | 0  | 0  | 0  | 0 | 0  | 1  | 0         | 0                | 1       |
| AT4G29220 | 0  | 0  | 0  | 0  | 0 | 0  | 1  | 0         | 0                | 1       |
| AT4G29340 | 0  | 0  | 0  | 0  | 0 | 1  | 0  | 0         | 0                | 1       |
| AT4G29350 | 0  | 0  | 0  | 0  | 0 | 0  | 1  | 0         | 0                | 1       |
| AT4G29370 | 0  | 0  | 0  | 0  | 0 | -1 | -1 | 0         | 0                | -1      |
| AT4G29670 | 0  | 0  | 0  | 0  | 0 | 0  | -1 | 0         | 0                | -1      |
| AT4G29700 | 0  | 0  | 0  | 0  | 0 | 0  | 1  | 0         | 0                | 1       |
| AT4G29810 | 0  | 0  | 0  | 0  | 0 | 0  | 1  | 0         | 0                | 1       |
| AT4G29840 | 0  | 0  | 0  | 0  | 0 | 0  | -1 | 0         | 0                | -1      |
| AT4G29890 | 0  | 0  | 0  | 0  | 0 | 0  | -1 | 0         | 0                | -1      |
| AT4G30060 | 0  | 0  | 0  | 0  | 0 | 0  | 1  | 0         | 1                | 1       |
| AT4G30080 | -1 | -1 | 0  | 0  | 0 | 0  | 0  | 0         | 0                | -1      |
| AT4G30100 | 0  | 0  | 0  | 0  | 0 | 0  | 1  | 0         | 0                | 1       |
| AT4G30160 | 0  | 0  | 0  | 0  | 0 | 0  | 1  | 0         | 0                | 1       |
| AT4G30170 | 0  | 0  | 0  | 1  | 0 | 1  | 1  | 0         | 0                | 1       |
| AT4G30180 | 0  | 0  | 0  | 0  | 0 | 1  | 0  | 0         | 0                | 1       |
| AT4G30190 | 0  | 0  | 0  | 0  | 0 | 0  | 1  | 0         | 0                | 1       |
| AT4G30250 | 0  | 0  | 0  | 0  | 0 | -1 | 0  | 0         | 0                | -1      |
| AT4G30270 | -1 | -1 | 0  | 0  | 0 | 0  | 0  | 0         | 0                | -1      |
| AT4G30280 | 1  | 1  | 1  | 0  | 0 | 1  | 1  | 0         | 0                | 1       |
| AT4G30290 | 1  | 1  | 1  | 0  | 1 | 1  | 1  | 0         | 1                | 1       |
| AT4G30310 | 0  | 0  | 0  | 0  | 0 | 0  | -1 | 0         | 0                | -1      |
| AT4G30320 | 0  | 0  | 0  | 0  | 0 | 0  | 0  | 0         | -1               | -1      |
| AT4G30340 | 1  | 1  | 1  | 0  | 0 | 0  | 1  | 0         | 0                | 1       |
| AT4G30400 | 0  | 1  | 0  | 0  | 0 | 0  | 1  | 0         | 0                | 1       |
| AT4G30410 | 0  | 0  | 0  | 0  | 0 | 0  | 1  | 0         | 0                | 1       |
| AT4G30440 | 1  | 1  | 1  | 0  | 0 | 0  | 0  | 0         | 0                | 1       |
| AT4G30470 | 0  | 0  | 0  | 0  | 0 | 1  | 1  | 0         | 0                | 1       |
| AT4G30530 | 0  | 0  | 0  | 0  | 0 | 0  | 1  | 0         | 1                | 1       |
| AT4G30580 | 0  | 0  | 0  | 0  | 0 | 0  | -1 | 0         | 0                | -1      |
| AT4G30610 | 0  | 0  | 0  | 0  | 0 | 0  | 1  | 0         | 0                | 1       |
| AT4G30620 | 0  | 0  | 0  | 0  | 0 | 0  | -1 | 0         | 0                | -1      |
| AT4G30670 | 0  | 0  | 0  | 0  | 0 | 0  | 1  | 0         | 0                | 1       |
| AT4G30720 | 0  | 0  | 0  | 0  | 0 | 0  | -1 | 0         | 0                | -1      |

Appendix Table S1

| Name      | 1  | 2  | 3  | 4 | 5 | 6  | 7  | bes1D_Col | bes1Dpif45_pif45 | ALL_BES |
|-----------|----|----|----|---|---|----|----|-----------|------------------|---------|
| AT4G30760 | 0  | 0  | 0  | 0 | 0 | 0  | -1 | 0         | 0                | -1      |
| AT4G30950 | 0  | 0  | 0  | 0 | 0 | 0  | -1 | 0         | 0                | -1      |
| AT4G30960 | 0  | 0  | 0  | 0 | 0 | 0  | 1  | 0         | 0                | 1       |
| AT4G30996 | 1  | 0  | 0  | 0 | 0 | 0  | 0  | 0         | 0                | 1       |
| AT4G31000 | 1  | 1  | 1  | 1 | 0 | 0  | 0  | 0         | 0                | 1       |
| AT4G31040 | 0  | 0  | 0  | 0 | 0 | 0  | -1 | 0         | 0                | -1      |
| AT4G31060 | 0  | 0  | 0  | 0 | 0 | 0  | -1 | 0         | 0                | -1      |
| AT4G31080 | 0  | 0  | 0  | 0 | 0 | 0  | 1  | 0         | 0                | 1       |
| AT4G31120 | 0  | 0  | 0  | 0 | 0 | 0  | -1 | 0         | 0                | -1      |
| AT4G31320 | 0  | 0  | 0  | 0 | 0 | -1 | 0  | 0         | 0                | -1      |
| AT4G31330 | 0  | 0  | 0  | 0 | 0 | 0  | -1 | 0         | 0                | -1      |
| AT4G31450 | 0  | 0  | 0  | 0 | 0 | 0  | 1  | 0         | 0                | 1       |
| AT4G31470 | 0  | 0  | 0  | 0 | 0 | -1 | 0  | 0         | 0                | -1      |
| AT4G31500 | 0  | 0  | 0  | 0 | 0 | 0  | 1  | 0         | 1                | 1       |
| AT4G31530 | 0  | 0  | 0  | 0 | 0 | 0  | -1 | 0         | 0                | -1      |
| AT4G31550 | 0  | 0  | 0  | 0 | 0 | 0  | 1  | 0         | 0                | 1       |
| AT4G31590 | 0  | 0  | 1  | 0 | 0 | 0  | 1  | 0         | 0                | 1       |
| AT4G31710 | 0  | 0  | 0  | 0 | 0 | 1  | 0  | 0         | 0                | 1       |
| AT4G31720 | 0  | 0  | 0  | 0 | 0 | 0  | -1 | 0         | 0                | -1      |
| AT4G31750 | 0  | 0  | 0  | 0 | 0 | 0  | 1  | 0         | 0                | 1       |
| AT4G31780 | 0  | 0  | 0  | 0 | 0 | 0  | -1 | 0         | 0                | -1      |
| AT4G31800 | 1  | 1  | 1  | 0 | 0 | 0  | 0  | 0         | 1                | 1       |
| AT4G31820 | -1 | -1 | 0  | 0 | 0 | 0  | 0  | 0         | 0                | -1      |
| AT4G31850 | 0  | 0  | 0  | 0 | 0 | 0  | -1 | 0         | 0                | -1      |
| AT4G31910 | 0  | 0  | 0  | 0 | 0 | 0  | 1  | 0         | 0                | 1       |
| AT4G31920 | 0  | 0  | 0  | 0 | 0 | 0  | 1  | 0         | 0                | 1       |
| AT4G31950 | 0  | 0  | 0  | 0 | 0 | 0  | 0  | 1         | 1                | 1       |
| AT4G31970 | 0  | 0  | 0  | 0 | 0 | 1  | 0  | 1         | 1                | 1       |
| AT4G32070 | 0  | 0  | 0  | 0 | 0 | 1  | 1  | 0         | 0                | 1       |
| AT4G32180 | 0  | 0  | -1 | 0 | 0 | 0  | 0  | 0         | 0                | -1      |
| AT4G32250 | 0  | 0  | -1 | 0 | 0 | 0  | 0  | 0         | 0                | -1      |
| AT4G32260 | 0  | 0  | 0  | 0 | 0 | 0  | -1 | 0         | 0                | -1      |
| AT4G32280 | 0  | 0  | 0  | 0 | 0 | 0  | 0  | 0         | -1               | -1      |
| AT4G32290 | -1 | -1 | -1 | 0 | 0 | 0  | 0  | 0         | 0                | -1      |
| AT4G32350 | 1  | 1  | 0  | 0 | 0 | 1  | 1  | 0         | 0                | 1       |
| AT4G32410 | 0  | 1  | 0  | 0 | 0 | 0  | 0  | 0         | 0                | 1       |
| AT4G32440 | 0  | 0  | 0  | 0 | 0 | 0  | 1  | 0         | 0                | 1       |
| AT4G32460 | 0  | 1  | 0  | 0 | 0 | 0  | 1  | 0         | 0                | 1       |
| AT4G32500 | 0  | 0  | 0  | 0 | 0 | 1  | 0  | 0         | 0                | 1       |
| AT4G32540 | 0  | 0  | 0  | 1 | 0 | 0  | 0  | 0         | 0                | 1       |
| AT4G32810 | 0  | 0  | 0  | 0 | 0 | 1  | 0  | 0         | 0                | 1       |
| AT4G32830 | 0  | 0  | 0  | 0 | 0 | 1  | 1  | 0         | 0                | 1       |
| AT4G32870 | -1 | -1 | 0  | 0 | 0 | 0  | 0  | 0         | 0                | -1      |
| AT4G32910 | 0  | 0  | 0  | 0 | 0 | 0  | -1 | 0         | 0                | -1      |
| AT4G32940 | 0  | 0  | 0  | 1 | 0 | 1  | 1  | 0         | 0                | 1       |
| AT4G32950 | 0  | 0  | 0  | 0 | 0 | 0  | 0  | 0         | -1               | -1      |
| AT4G32980 | -1 | 0  | 0  | 0 | 0 | -1 | 0  | 0         | 0                | -1      |
| AT4G33000 | 0  | 0  | 0  | 0 | 0 | 0  | -1 | 0         | 0                | -1      |
| AT4G33010 | 0  | 0  | 0  | 0 | 0 | 0  | 0  | -1        | 0                | -1      |
| AT4G33040 | 0  | 0  | 0  | 0 | 0 | 1  | 0  | 0         | 0                | 1       |
| AT4G33050 | 0  | 0  | 0  | 1 | 0 | 0  | 0  | 1         | 0                | 1       |
| AT4G33100 | 0  | 0  | 0  | 1 | 0 | 0  | 0  | 0         | 0                | 1       |
| AT4G33220 | 0  | 0  | 0  | 0 | 0 | 1  | 1  | 0         | 0                | 1       |
| AT4G33260 | 0  | 0  | 0  | 0 | 0 | 1  | 1  | 0         | 0                | 1       |
| AT4G33270 | 0  | 0  | 0  | 0 | 0 | 0  | 1  | 0         | 0                | 1       |
| AT4G33420 | 0  | 0  | 0  | 0 | 0 | 0  | 1  | 0         | 0                | 1       |
| AT4G33467 | 0  | 0  | 0  | 0 | 0 | 1  | 0  | 0         | 0                | 1       |
| AT4G33470 | 0  | 0  | -1 | 0 | 0 | 0  | -1 | 0         | 0                | -1      |
| AT4G33480 | 0  | 0  | 0  | 0 | 0 | 0  | -1 | 0         | 0                | -1      |
| AT4G33520 | 0  | 0  | 0  | 0 | 0 | 0  | -1 | 0         | 0                | -1      |
| AT4G33550 | 0  | 0  | 0  | 0 | 0 | 0  | 0  | -1        | 0                | -1      |

Appendix Table S1

| Name      | 1  | 2  | 3  | 4  | 5 | 6  | 7  | bes1D_Col | bes1Dpif45_pif45 | ALL_BES |
|-----------|----|----|----|----|---|----|----|-----------|------------------|---------|
| AT4G33560 | 0  | 0  | 0  | -1 | 0 | 0  | 0  | 0         | 0                | -1      |
| AT4G33610 | 0  | 0  | 0  | 0  | 0 | 1  | 0  | 0         | 0                | 1       |
| AT4G33630 | 0  | 0  | -1 | 0  | 0 | 0  | 0  | 0         | 0                | -1      |
| AT4G33666 | 0  | 0  | 0  | 0  | 0 | 1  | 0  | 0         | 0                | 1       |
| AT4G33670 | -1 | -1 | 0  | 0  | 0 | 0  | -1 | 0         | 0                | -1      |
| AT4G33700 | -1 | -1 | 0  | 0  | 0 | 0  | 0  | 0         | 0                | -1      |
| AT4G33730 | 0  | 0  | 0  | 0  | 0 | -1 | 0  | 0         | 0                | -1      |
| AT4G33740 | 0  | 0  | 0  | 0  | 0 | 1  | 0  | 0         | 0                | 1       |
| AT4G33790 | 0  | 1  | 1  | 0  | 0 | 0  | 0  | 0         | 0                | 1       |
| AT4G33800 | 0  | 0  | 0  | 0  | 0 | -1 | 0  | 0         | 0                | -1      |
| AT4G33880 | 0  | 0  | 0  | 0  | 0 | -1 | 0  | 0         | 0                | -1      |
| AT4G33910 | 0  | 0  | 0  | 1  | 0 | 0  | 0  | 0         | 0                | 1       |
| AT4G33920 | 0  | 1  | 0  | 0  | 0 | 0  | 1  | 0         | 0                | 1       |
| AT4G33960 | 0  | 0  | 0  | 0  | 0 | 0  | -1 | 0         | 0                | -1      |
| AT4G34050 | 0  | 0  | 0  | 0  | 0 | 0  | 1  | 0         | 0                | 1       |
| AT4G34090 | 0  | 0  | 0  | 0  | 0 | 0  | -1 | 0         | 0                | -1      |
| AT4G34131 | 0  | 0  | 0  | 1  | 0 | 0  | 0  | 0         | 0                | 1       |
| AT4G34150 | 0  | 0  | 0  | 1  | 0 | 0  | 0  | 0         | 1                | 1       |
| AT4G34190 | 0  | 0  | 0  | 0  | 0 | 0  | -1 | 0         | 0                | -1      |
| AT4G34200 | 0  | -1 | 0  | 0  | 0 | 0  | -1 | 0         | 0                | -1      |
| AT4G34230 | 0  | 0  | 0  | 0  | 0 | 0  | 1  | 0         | 0                | 1       |
| AT4G34260 | 0  | 0  | 0  | 0  | 0 | -1 | 0  | 0         | 0                | -1      |
| AT4G34290 | 0  | 0  | 0  | 0  | 0 | 0  | -1 | -1        | 0                | -1      |
| AT4G34390 | 0  | 0  | 0  | 0  | 0 | 0  | 1  | 0         | 0                | 1       |
| AT4G34480 | 0  | 0  | 0  | 1  | 0 | 0  | 0  | 0         | 0                | 1       |
| AT4G34490 | 0  | 0  | 0  | 0  | 0 | 0  | 1  | 0         | 0                | 1       |
| AT4G34520 | 0  | 0  | 0  | 0  | 0 | 1  | 0  | 0         | 0                | 1       |
| AT4G34580 | 0  | 0  | 0  | 0  | 0 | -1 | 0  | 0         | 0                | -1      |
| AT4G34610 | -1 | -1 | -1 | 0  | 0 | 0  | 0  | -1        | -1               | -1      |
| AT4G34670 | 0  | 0  | 0  | 0  | 0 | 0  | -1 | 0         | 0                | -1      |
| AT4G34740 | 0  | 0  | 0  | 0  | 0 | 0  | -1 | 0         | 0                | -1      |
| AT4G34760 | 0  | 0  | 0  | 0  | 0 | 1  | 1  | 0         | 0                | 1       |
| AT4G34770 | 1  | 0  | 0  | 0  | 0 | 0  | 0  | 0         | 0                | 1       |
| AT4G34790 | 0  | 0  | 0  | 0  | 0 | 1  | 0  | 0         | 0                | 1       |
| AT4G34810 | 0  | 0  | 0  | 0  | 0 | 1  | 0  | 1         | 0                | 1       |
| AT4G34830 | 0  | 0  | 0  | 0  | 0 | 0  | 0  | -1        | 0                | -1      |
| AT4G34860 | -1 | -1 | 0  | 0  | 0 | 0  | 0  | 0         | 0                | -1      |
| AT4G34950 | 0  | 0  | 0  | 0  | 0 | 0  | -1 | 0         | 0                | -1      |
| AT4G34970 | 0  | 0  | 0  | -1 | 0 | 0  | -1 | 0         | 0                | -1      |
| AT4G35060 | 0  | 0  | 0  | 0  | 0 | 0  | 1  | 0         | 0                | 1       |
| AT4G35100 | 0  | 0  | 0  | 0  | 0 | 1  | 0  | 0         | 0                | 1       |
| AT4G35110 | 0  | 0  | 0  | 0  | 0 | 0  | 1  | 0         | 0                | 1       |
| AT4G35200 | 0  | 0  | 0  | 0  | 0 | -1 | 0  | 0         | 0                | -1      |
| AT4G35250 | 0  | 0  | 0  | 0  | 0 | 0  | -1 | 0         | 0                | -1      |
| AT4G35260 | 0  | 0  | 0  | 0  | 0 | 0  | 1  | 0         | 0                | 1       |
| AT4G35310 | 0  | 0  | 0  | 0  | 0 | 0  | 1  | 0         | 0                | 1       |
| AT4G35320 | 1  | 1  | 1  | 1  | 0 | 1  | 1  | 0         | 0                | 1       |
| AT4G35440 | 0  | 0  | 0  | 0  | 0 | 0  | -1 | 0         | 0                | -1      |
| AT4G35470 | 0  | 1  | 0  | 0  | 0 | 0  | 1  | 0         | 0                | 1       |
| AT4G35620 | 0  | 0  | 0  | 0  | 0 | 1  | 0  | 0         | 0                | 1       |
| AT4G35720 | 0  | 0  | 0  | -1 | 0 | 0  | 0  | 0         | 0                | -1      |
| AT4G35750 | 0  | 0  | 0  | 0  | 0 | 0  | 1  | 0         | 0                | 1       |
| AT4G35770 | 0  | 0  | 0  | -1 | 0 | 0  | 0  | 0         | 0                | -1      |
| AT4G35910 | 0  | 0  | 0  | 0  | 0 | 0  | -1 | 0         | 0                | -1      |
| AT4G35920 | 0  | 0  | 0  | 0  | 0 | 0  | -1 | 0         | 0                | -1      |
| AT4G35970 | 0  | 0  | 0  | 0  | 0 | 0  | 1  | 0         | 0                | 1       |
| AT4G36110 | 1  | 1  | 1  | 1  | 1 | 1  | 1  | 1         | 1                | 1       |
| AT4G36120 | 0  | 0  | 0  | 0  | 0 | 1  | 0  | 0         | 0                | 1       |
| AT4G36220 | 0  | 0  | 0  | 0  | 0 | -1 | 0  | 0         | 0                | -1      |
| AT4G36230 | 0  | 0  | 0  | 0  | 0 | 1  | 0  | 0         | 0                | 1       |
| AT4G36360 | 0  | 0  | 0  | 0  | 0 | 0  | 1  | 0         | 0                | 1       |

Appendix Table S1

| Name      | 1  | 2  | 3  | 4  | 5  | 6  | 7  | bes1D_Col | bes1Dpif45_pif45 | ALL_BES |
|-----------|----|----|----|----|----|----|----|-----------|------------------|---------|
| AT4G36380 | -1 | -1 | -1 | -1 | -1 | 0  | 0  | 0         | 0                | -1      |
| AT4G36430 | 0  | 0  | 0  | 1  | 0  | 1  | 1  | 1         | 1                | 1       |
| AT4G36500 | 0  | 0  | 0  | 0  | 0  | 1  | 1  | 0         | 0                | 1       |
| AT4G36530 | 0  | 0  | 0  | 0  | 0  | 0  | -1 | 0         | 0                | -1      |
| AT4G36550 | 0  | 0  | 0  | 1  | 0  | 0  | 0  | 0         | 0                | 1       |
| AT4G36570 | 0  | 0  | 0  | 0  | 0  | 1  | 0  | 0         | 0                | 1       |
| AT4G36610 | 0  | 0  | 0  | 0  | 0  | 1  | 0  | 1         | 1                | 1       |
| AT4G36670 | 0  | 0  | 0  | 0  | 0  | 0  | -1 | 0         | 0                | -1      |
| AT4G36700 | 0  | 0  | 0  | -1 | 0  | 0  | 0  | 0         | 0                | -1      |
| AT4G36780 | -1 | -1 | -1 | -1 | -1 | 0  | 0  | 0         | 0                | -1      |
| AT4G36790 | 0  | -1 | 0  | 0  | 0  | 0  | 0  | 0         | 0                | -1      |
| AT4G36810 | 0  | -1 | 0  | 0  | 0  | 0  | 0  | 0         | 0                | -1      |
| AT4G36830 | 0  | 0  | 0  | 0  | 0  | 0  | 0  | -1        | 0                | -1      |
| AT4G36880 | 0  | 0  | 0  | 0  | 0  | 1  | 1  | 0         | 0                | 1       |
| AT4G36890 | 0  | 0  | 0  | 0  | 0  | 0  | 1  | 0         | 0                | 1       |
| AT4G36930 | 0  | 0  | 0  | 0  | 0  | 0  | -1 | 0         | 0                | -1      |
| AT4G36960 | 0  | 0  | -1 | 0  | 0  | 0  | 0  | 0         | 0                | -1      |
| AT4G36990 | 0  | 0  | 0  | 0  | 0  | 0  | 1  | 0         | 0                | 1       |
| AT4G37000 | 0  | 0  | 0  | 0  | 0  | 0  | -1 | 0         | 0                | -1      |
| AT4G37010 | 0  | 0  | 0  | 0  | 0  | 1  | 1  | 0         | 0                | 1       |
| AT4G37050 | 0  | 0  | 0  | 0  | 0  | 1  | 0  | 0         | 0                | 1       |
| AT4G37060 | 0  | 0  | 0  | 0  | 0  | 1  | 1  | 0         | 0                | 1       |
| AT4G37070 | 0  | 0  | 0  | 0  | 0  | 1  | 1  | 0         | 0                | 1       |
| AT4G37080 | 0  | -1 | -1 | 0  | 0  | 0  | 0  | 0         | 0                | -1      |
| AT4G37120 | 0  | 0  | -1 | 0  | 0  | 0  | 0  | 0         | 0                | -1      |
| AT4G37160 | 0  | -1 | 0  | 0  | 0  | 0  | 0  | 0         | 0                | -1      |
| AT4G37180 | 0  | 0  | -1 | 0  | 0  | 0  | 0  | 0         | 0                | -1      |
| AT4G37220 | 0  | 0  | 0  | 0  | 0  | 0  | 1  | 0         | 0                | 1       |
| AT4G37240 | 1  | 1  | 1  | 1  | 0  | 1  | 1  | 0         | 0                | 1       |
| AT4G37250 | 0  | 0  | 0  | 0  | 0  | 0  | -1 | 0         | 0                | -1      |
| AT4G37290 | 0  | 0  | 0  | 0  | 0  | 0  | 0  | 1         | 0                | 1       |
| AT4G37295 | 0  | 0  | 0  | 0  | 0  | 1  | 0  | 0         | 0                | 1       |
| AT4G37310 | -1 | -1 | 0  | -1 | 0  | 0  | 0  | 0         | 0                | -1      |
| AT4G37390 | 0  | 0  | 0  | 1  | 0  | 1  | 0  | 0         | 1                | 1       |
| AT4G37410 | 0  | 0  | 0  | -1 | 0  | 0  | 0  | -1        | -1               | -1      |
| AT4G37450 | 1  | 1  | 1  | 1  | 0  | 0  | 0  | 0         | 0                | 1       |
| AT4G37510 | 0  | 0  | 0  | 0  | 0  | 0  | -1 | 0         | 0                | -1      |
| AT4G37530 | 0  | 0  | 0  | 0  | 0  | 1  | 0  | 0         | 0                | 1       |
| AT4G37540 | -1 | -1 | -1 | -1 | 0  | 0  | -1 | 0         | 0                | -1      |
| AT4G37550 | -1 | 0  | -1 | -1 | 0  | 0  | 0  | 0         | 0                | -1      |
| AT4G37560 | -1 | -1 | -1 | 0  | 0  | 0  | 0  | 0         | 0                | -1      |
| AT4G37580 | 0  | -1 | 0  | 0  | 0  | 0  | 0  | 0         | 0                | -1      |
| AT4G37590 | 0  | -1 | 0  | 0  | 0  | 0  | 0  | 0         | 0                | -1      |
| AT4G37700 | 0  | 0  | 0  | 0  | 0  | -1 | 0  | -1        | -1               | -1      |
| AT4G37790 | 0  | 0  | 0  | 0  | 0  | 0  | 1  | 0         | 0                | 1       |
| AT4G37850 | 0  | 0  | 0  | 0  | 0  | -1 | 0  | 0         | 0                | -1      |
| AT4G37890 | 0  | 0  | 0  | 0  | 0  | 1  | 1  | 0         | 0                | 1       |
| AT4G37920 | 0  | 0  | 0  | 0  | 0  | 0  | 0  | 0         | -1               | -1      |
| AT4G37930 | 0  | 0  | 0  | 0  | 0  | 0  | 0  | -1        | 0                | -1      |
| AT4G37940 | 0  | 0  | 0  | 0  | 0  | -1 | 0  | 0         | 0                | -1      |
| AT4G37980 | -1 | -1 | -1 | -1 | 0  | 0  | -1 | 0         | 0                | -1      |
| AT4G38030 | 0  | 0  | 0  | 1  | 0  | 0  | 0  | 0         | 0                | 1       |
| AT4G38060 | 0  | 0  | 0  | 0  | 0  | 1  | 1  | 0         | 0                | 1       |
| AT4G38080 | 0  | 0  | 0  | 0  | 0  | 1  | 0  | 1         | 1                | 1       |
| AT4G38090 | 0  | 0  | 0  | 0  | 0  | 0  | -1 | 0         | 0                | -1      |
| AT4G38150 | 0  | 0  | 0  | 0  | 0  | 0  | -1 | 0         | 0                | -1      |
| AT4G38160 | 0  | 0  | 0  | 0  | 0  | 0  | -1 | 0         | 0                | -1      |
| AT4G38225 | 0  | 0  | 0  | 0  | 0  | 0  | -1 | 0         | 0                | -1      |
| AT4G38260 | 0  | 0  | 0  | 0  | 0  | 0  | 1  | 0         | 0                | 1       |
| AT4G38290 | 0  | 0  | 0  | 0  | 0  | 0  | -1 | 0         | 0                | -1      |
| AT4G38390 | 0  | 0  | 0  | 0  | 0  | 1  | 0  | 0         | 0                | 1       |

Appendix Table S1

| Name      | 1  | 2  | 3  | 4  | 5  | 6  | 7  | bes1D_Col | bes1Dpif45_pif45 | ALL_BES |
|-----------|----|----|----|----|----|----|----|-----------|------------------|---------|
| AT4G38400 | 1  | 1  | 0  | 1  | 1  | 1  | 1  | 0         | 0                | 1       |
| AT4G38470 | 0  | 0  | 0  | 0  | 0  | 0  | 1  | 0         | 0                | 1       |
| AT4G38490 | 0  | 0  | 0  | 0  | 0  | 0  | -1 | 0         | 0                | -1      |
| AT4G38680 | 0  | 0  | 0  | 0  | 0  | 0  | 0  | 0         | -1               | -1      |
| AT4G38740 | 0  | 0  | 0  | 0  | 0  | -1 | 0  | 0         | 0                | -1      |
| AT4G38840 | 1  | 1  | 1  | 0  | 0  | 1  | 0  | 0         | 0                | 1       |
| AT4G38850 | 1  | 1  | 0  | 1  | 0  | 1  | 1  | 1         | 0                | 1       |
| AT4G38860 | 1  | 1  | 1  | 1  | 1  | 1  | 1  | 0         | 0                | 1       |
| AT4G38930 | 0  | 0  | 0  | 0  | 0  | 0  | 1  | 0         | 0                | 1       |
| AT4G38970 | 0  | 0  | 0  | 0  | 0  | 0  | -1 | 0         | 0                | -1      |
| AT4G39030 | 0  | 0  | 0  | 1  | 0  | 0  | 1  | 0         | 0                | 1       |
| AT4G39040 | 0  | 0  | 0  | -1 | 0  | 0  | -1 | 0         | 0                | -1      |
| AT4G39070 | 0  | 0  | 0  | 0  | 0  | 0  | -1 | 0         | 0                | -1      |
| AT4G39140 | 0  | 0  | 0  | 0  | 0  | 0  | 1  | 0         | 0                | 1       |
| AT4G39200 | 0  | 0  | 0  | 0  | 0  | 0  | -1 | 0         | 0                | -1      |
| AT4G39270 | 0  | 0  | 0  | 0  | 0  | 0  | 1  | 0         | 0                | 1       |
| AT4G39400 | -1 | -1 | -1 | 0  | 0  | 0  | 0  | 0         | 0                | -1      |
| AT4G39403 | 0  | 0  | 0  | 0  | 0  | -1 | 0  | 0         | 0                | -1      |
| AT4G39404 | 0  | 0  | 0  | 0  | 0  | -1 | 0  | 0         | -1               | -1      |
| AT4G39460 | 0  | 0  | 0  | 0  | 0  | 0  | -1 | 0         | 0                | -1      |
| AT4G39480 | 0  | 0  | 0  | -1 | 0  | 0  | 0  | 0         | 0                | -1      |
| AT4G39510 | 0  | 0  | 0  | 1  | 0  | 0  | 0  | 0         | 0                | 1       |
| AT4G39550 | 0  | 0  | 0  | 0  | 0  | 0  | -1 | 0         | 0                | -1      |
| AT4G39640 | 0  | 0  | 0  | 1  | 0  | 1  | 0  | 0         | 0                | 1       |
| AT4G39670 | 0  | 0  | 0  | 1  | 0  | 0  | 0  | 0         | 0                | 1       |
| AT4G39710 | 0  | 0  | 0  | 0  | 0  | 0  | -1 | 0         | 0                | -1      |
| AT4G39780 | 0  | 0  | 0  | 0  | 0  | 1  | 0  | 0         | 0                | 1       |
| AT4G39830 | 0  | 0  | 0  | 1  | 0  | 1  | 0  | 0         | 0                | 1       |
| AT4G39840 | 1  | 1  | 0  | 1  | 0  | 0  | 0  | 0         | 0                | 1       |
| AT4G39890 | 0  | 0  | 0  | 1  | 0  | 0  | 0  | 0         | 0                | 1       |
| AT4G39900 | 0  | -1 | 0  | 0  | 0  | 0  | -1 | 0         | 0                | -1      |
| AT4G39990 | 0  | 0  | 1  | 0  | 0  | 0  | 1  | 0         | 0                | 1       |
| AT4G40010 | 0  | 0  | 0  | 0  | 0  | 0  | 1  | 0         | 0                | 1       |
| AT4G40045 | 0  | 0  | 0  | 0  | 0  | 0  | -1 | 0         | 0                | -1      |
| AT5G01020 | 0  | 0  | 0  | 0  | 0  | 0  | -1 | 0         | 0                | -1      |
| AT5G01210 | 0  | 0  | 1  | 0  | 0  | 0  | 0  | 0         | 0                | 1       |
| AT5G01220 | 0  | 0  | 0  | 0  | 0  | 0  | 1  | 0         | 0                | 1       |
| AT5G01240 | 0  | 0  | 0  | 0  | 0  | 0  | -1 | 0         | 0                | -1      |
| AT5G01250 | 0  | 0  | 0  | 0  | 0  | 1  | 0  | 0         | 0                | 1       |
| AT5G01320 | 0  | 0  | 0  | 0  | 0  | 1  | 1  | 0         | 0                | 1       |
| AT5G01330 | 0  | 0  | 0  | 0  | 0  | 1  | 1  | 0         | 0                | 1       |
| AT5G01360 | 0  | 0  | 0  | 0  | 0  | 1  | 1  | 0         | 0                | 1       |
| AT5G01380 | 0  | 0  | 0  | 0  | 0  | 1  | 0  | 0         | 0                | 1       |
| AT5G01500 | 0  | -1 | 0  | 0  | 0  | 0  | 0  | 0         | 0                | -1      |
| AT5G01520 | 0  | 0  | 0  | 0  | 0  | 1  | 0  | 0         | 0                | 1       |
| AT5G01530 | 0  | 0  | 0  | 0  | 0  | 0  | -1 | 0         | 0                | -1      |
| AT5G01550 | 0  | 0  | 0  | 0  | 0  | 1  | 0  | 0         | 1                | 1       |
| AT5G01600 | 0  | 0  | 0  | 1  | 0  | 0  | 0  | 0         | 0                | 1       |
| AT5G01610 | 0  | 0  | 0  | 0  | 0  | 0  | 1  | 0         | 0                | 1       |
| AT5G01640 | 0  | 0  | 0  | 0  | 0  | 1  | 0  | 0         | 1                | 1       |
| AT5G01710 | 1  | 1  | 0  | 0  | 0  | 0  | 0  | 0         | 0                | 1       |
| AT5G01740 | -1 | -1 | -1 | 0  | -1 | -1 | -1 | 0         | -1               | -1      |
| AT5G01800 | 0  | 0  | 0  | 0  | 0  | 0  | 1  | 0         | 0                | 1       |
| AT5G01810 | 0  | 0  | 0  | 0  | 0  | 0  | 1  | 0         | 0                | 1       |
| AT5G01840 | 0  | 0  | 0  | 0  | 0  | -1 | 0  | 0         | 0                | -1      |
| AT5G01870 | 0  | 0  | 0  | 0  | 0  | -1 | -1 | 0         | 0                | -1      |
| AT5G01910 | 0  | 0  | 0  | 0  | 0  | 1  | 0  | 0         | 0                | 1       |
| AT5G01920 | 0  | 0  | 0  | 0  | 0  | 0  | -1 | 0         | 0                | -1      |
| AT5G01980 | 0  | 0  | 0  | 0  | 0  | 0  | -1 | 0         | 0                | -1      |
| AT5G01990 | 0  | 0  | -1 | 0  | 0  | 0  | 0  | 0         | 0                | -1      |
| AT5G02020 | 1  | 1  | 0  | 0  | 0  | 1  | 1  | 0         | 0                | 1       |



Appendix Table S1

| Name      | 1  | 2  | 3  | 4  | 5 | 6  | 7  | bes1D_Col | bes1Dpif45_pif45 | ALL_BES |
|-----------|----|----|----|----|---|----|----|-----------|------------------|---------|
| AT5G02030 | 0  | 0  | 0  | 0  | 0 | 0  | -1 | 0         | 0                | -1      |
| AT5G02120 | 0  | 0  | 0  | 0  | 0 | 0  | -1 | 0         | 0                | -1      |
| AT5G02150 | 0  | 0  | 0  | 0  | 0 | 0  | -1 | 0         | 0                | -1      |
| AT5G02180 | 0  | 0  | 0  | 0  | 0 | 1  | 0  | 0         | 0                | 1       |
| AT5G02200 | 0  | 0  | 0  | 0  | 0 | 0  | -1 | 0         | 0                | -1      |
| AT5G02230 | 0  | 0  | 0  | 0  | 0 | 0  | 1  | 0         | 0                | 1       |
| AT5G02260 | -1 | 0  | 0  | 0  | 0 | 0  | 0  | 0         | 0                | -1      |
| AT5G02270 | 0  | 0  | 0  | 0  | 0 | 0  | 1  | 0         | 0                | 1       |
| AT5G02430 | 0  | 0  | 0  | 0  | 0 | 1  | 0  | 0         | 0                | 1       |
| AT5G02440 | 0  | 0  | 0  | 0  | 0 | 0  | -1 | 0         | 0                | -1      |
| AT5G02490 | 0  | 0  | 0  | 1  | 0 | 0  | 0  | 0         | 1                | 1       |
| AT5G02540 | -1 | -1 | -1 | 0  | 0 | 0  | 0  | 0         | -1               | -1      |
| AT5G02560 | 0  | 0  | 0  | 0  | 0 | 1  | 1  | 0         | 0                | 1       |
| AT5G02760 | 0  | 0  | 0  | 0  | 0 | 0  | -1 | 0         | 0                | -1      |
| AT5G02780 | 0  | 0  | 0  | 0  | 0 | 0  | 0  | 0         | 1                | 1       |
| AT5G02890 | 1  | 1  | 0  | 0  | 0 | 0  | 0  | 0         | 0                | 1       |
| AT5G02930 | 0  | 0  | 0  | 0  | 0 | 1  | 0  | 0         | 0                | 1       |
| AT5G03040 | 1  | 1  | 0  | 0  | 0 | 0  | 1  | 0         | 0                | 1       |
| AT5G03050 | 0  | 0  | 0  | 0  | 0 | -1 | 0  | 0         | 0                | -1      |
| AT5G03120 | 1  | 1  | 0  | 0  | 0 | 0  | 0  | 0         | 0                | 1       |
| AT5G03140 | 0  | -1 | 0  | 0  | 0 | 0  | 0  | 0         | 0                | -1      |
| AT5G03180 | 0  | 0  | 0  | 0  | 0 | 0  | -1 | 0         | 0                | -1      |
| AT5G03190 | 0  | 0  | 0  | 0  | 0 | -1 | -1 | 0         | 0                | -1      |
| AT5G03230 | 0  | 0  | 0  | 0  | 0 | 0  | -1 | 0         | 0                | -1      |
| AT5G03240 | 0  | 0  | 0  | 0  | 0 | 0  | 0  | -1        | 0                | -1      |
| AT5G03310 | 0  | 0  | 0  | 0  | 0 | 0  | -1 | 0         | 0                | -1      |
| AT5G03350 | 0  | 0  | 0  | 0  | 0 | 1  | 0  | 0         | 0                | 1       |
| AT5G03380 | 0  | 0  | 0  | 0  | 0 | 1  | 1  | 0         | 0                | 1       |
| AT5G03430 | 0  | 0  | -1 | 0  | 0 | 0  | 0  | 0         | 0                | -1      |
| AT5G03520 | 1  | 1  | 1  | 0  | 0 | 0  | 1  | 0         | 0                | 1       |
| AT5G03630 | 0  | 0  | 0  | 0  | 0 | 0  | 1  | 0         | 0                | 1       |
| AT5G03640 | 0  | 0  | 0  | 0  | 0 | 1  | 0  | 0         | 0                | 1       |
| AT5G03670 | 0  | -1 | -1 | 0  | 0 | 0  | 0  | 0         | 0                | -1      |
| AT5G03730 | 0  | 0  | -1 | 0  | 0 | 0  | 0  | 0         | 0                | -1      |
| AT5G03740 | 0  | 0  | -1 | 0  | 0 | 0  | 0  | 0         | 0                | -1      |
| AT5G03760 | 0  | 1  | 0  | 0  | 0 | 0  | 0  | 0         | 0                | 1       |
| AT5G03770 | 0  | 0  | 0  | 0  | 0 | 0  | -1 | 0         | 0                | -1      |
| AT5G03880 | 0  | 0  | 0  | 0  | 0 | 0  | -1 | 0         | 0                | -1      |
| AT5G03960 | 0  | 1  | 1  | 0  | 0 | 0  | 0  | 0         | 0                | 1       |
| AT5G04160 | 0  | 0  | 1  | 0  | 0 | 0  | 0  | 0         | 0                | 1       |
| AT5G04190 | 1  | 0  | 0  | 0  | 0 | 0  | 0  | 0         | 0                | 1       |
| AT5G04200 | 0  | 0  | 0  | 0  | 0 | 0  | 1  | 0         | 0                | 1       |
| AT5G04230 | 0  | 0  | 0  | 0  | 0 | 0  | -1 | 0         | 0                | -1      |
| AT5G04240 | 0  | 0  | -1 | 0  | 0 | 0  | 0  | 0         | 0                | -1      |
| AT5G04310 | 0  | 0  | 0  | 0  | 0 | 1  | 1  | 0         | 1                | 1       |
| AT5G04340 | 0  | 0  | 0  | 0  | 0 | 1  | 0  | 0         | 0                | 1       |
| AT5G04440 | 0  | 0  | 0  | 0  | 0 | 0  | -1 | 0         | 0                | -1      |
| AT5G04490 | 0  | 0  | 0  | 0  | 0 | 0  | -1 | 0         | 0                | -1      |
| AT5G04520 | 0  | 0  | -1 | 0  | 0 | 0  | 0  | 0         | 0                | -1      |
| AT5G04540 | 0  | 0  | -1 | 0  | 0 | 0  | 0  | 0         | 0                | -1      |
| AT5G04590 | -1 | -1 | 0  | 0  | 0 | 0  | 0  | 0         | 0                | -1      |
| AT5G04710 | 0  | 0  | 0  | 0  | 0 | 0  | -1 | 0         | 0                | -1      |
| AT5G04750 | 0  | 0  | 0  | 0  | 0 | 0  | 1  | 0         | 0                | 1       |
| AT5G04870 | 0  | 0  | 1  | 0  | 0 | 0  | 0  | 0         | 0                | 1       |
| AT5G04880 | 0  | 0  | 0  | 0  | 0 | 0  | -1 | 0         | 0                | -1      |
| AT5G04900 | 0  | 0  | 0  | 0  | 0 | 0  | -1 | 0         | 0                | -1      |
| AT5G04950 | 0  | -1 | 0  | -1 | 0 | 0  | 0  | 0         | -1               | -1      |
| AT5G04960 | 0  | 0  | 0  | 0  | 0 | -1 | 0  | 0         | 0                | -1      |
| AT5G04970 | 0  | 0  | 0  | 0  | 0 | 1  | 0  | 0         | 0                | 1       |
| AT5G05090 | 0  | 1  | 1  | 0  | 0 | 0  | 0  | 0         | 0                | 1       |
| AT5G05100 | 0  | 0  | -1 | 0  | 0 | 0  | -1 | 0         | 0                | -1      |



Appendix Table S1

| Name      | 1  | 2  | 3  | 4 | 5 | 6  | 7  | bes1D_Col | bes1Dpif45_pif45 | ALL_BES |
|-----------|----|----|----|---|---|----|----|-----------|------------------|---------|
| AT5G08260 | 0  | 0  | 0  | 0 | 0 | 0  | -1 | 0         | 0                | -1      |
| AT5G08280 | 0  | 0  | 0  | 0 | 0 | 0  | -1 | 0         | 0                | -1      |
| AT5G08300 | 0  | 0  | 0  | 0 | 0 | 0  | 1  | 0         | 0                | 1       |
| AT5G08335 | 0  | 0  | -1 | 0 | 0 | 0  | 0  | 0         | 0                | -1      |
| AT5G08340 | 0  | 0  | 0  | 0 | 0 | 0  | -1 | 0         | 0                | -1      |
| AT5G08350 | 0  | 0  | 0  | 0 | 0 | 1  | 0  | 0         | 0                | 1       |
| AT5G08370 | 0  | 0  | 0  | 0 | 0 | 0  | 1  | 0         | 0                | 1       |
| AT5G08380 | 0  | 0  | 0  | 0 | 0 | 0  | -1 | 0         | 0                | -1      |
| AT5G08410 | 0  | 0  | 0  | 0 | 0 | 0  | -1 | 0         | 0                | -1      |
| AT5G08420 | 0  | 0  | -1 | 0 | 0 | 0  | 0  | 0         | 0                | -1      |
| AT5G08480 | 0  | 0  | 0  | 0 | 0 | 1  | 0  | 0         | 0                | 1       |
| AT5G08565 | -1 | -1 | 0  | 0 | 0 | 0  | -1 | 0         | 0                | -1      |
| AT5G08570 | 0  | 0  | 0  | 0 | 0 | 0  | -1 | 0         | 0                | -1      |
| AT5G08590 | 0  | 0  | 0  | 0 | 0 | 0  | 1  | 0         | 0                | 1       |
| AT5G08620 | 0  | 0  | 0  | 0 | 0 | 0  | -1 | 0         | 0                | -1      |
| AT5G09220 | 0  | 0  | 0  | 0 | 0 | -1 | 0  | 0         | 0                | -1      |
| AT5G09270 | 0  | 0  | 0  | 0 | 0 | -1 | 0  | 0         | 0                | -1      |
| AT5G09290 | 0  | 0  | 0  | 0 | 0 | 0  | 1  | 0         | 0                | 1       |
| AT5G09310 | 0  | 0  | -1 | 0 | 0 | 0  | 0  | 0         | 0                | -1      |
| AT5G09350 | 0  | 0  | 0  | 0 | 0 | 0  | -1 | 0         | 0                | -1      |
| AT5G09440 | -1 | -1 | -1 | 0 | 0 | 0  | 0  | 0         | 0                | -1      |
| AT5G09480 | 0  | 0  | 0  | 0 | 0 | 1  | 0  | 0         | 1                | 1       |
| AT5G09520 | 0  | 0  | 0  | 0 | 0 | 1  | 0  | 1         | 1                | 1       |
| AT5G09530 | 0  | 0  | 0  | 0 | 0 | 1  | 0  | 1         | 1                | 1       |
| AT5G09650 | 0  | 0  | 0  | 0 | 0 | 0  | -1 | 0         | 0                | -1      |
| AT5G09750 | 0  | 0  | 0  | 0 | 0 | 1  | 0  | 0         | 0                | 1       |
| AT5G09770 | 0  | 0  | 0  | 0 | 0 | 0  | -1 | 0         | 0                | -1      |
| AT5G09810 | 0  | 0  | 0  | 0 | 0 | 0  | 1  | 0         | 0                | 1       |
| AT5G09870 | 1  | 1  | 0  | 0 | 0 | 0  | 0  | 0         | 0                | 1       |
| AT5G09890 | 0  | 0  | 0  | 0 | 0 | 0  | 1  | 0         | 0                | 1       |
| AT5G09978 | 0  | 0  | 0  | 0 | 0 | -1 | 0  | 0         | 0                | -1      |
| AT5G10100 | 0  | 0  | -1 | 0 | 0 | 0  | 0  | 0         | 0                | -1      |
| AT5G10130 | 0  | 0  | 0  | 0 | 0 | -1 | 0  | 0         | 0                | -1      |
| AT5G10180 | 0  | 0  | 0  | 0 | 0 | 0  | -1 | 0         | 0                | -1      |
| AT5G10190 | 0  | 0  | 0  | 0 | 0 | 0  | 1  | 0         | 0                | 1       |
| AT5G10210 | 0  | 0  | 0  | 0 | 0 | 1  | 0  | 0         | 0                | 1       |
| AT5G10290 | -1 | -1 | -1 | 0 | 0 | 0  | 0  | 0         | 0                | -1      |
| AT5G10400 | 0  | 0  | 0  | 0 | 0 | 0  | 1  | 0         | 0                | 1       |
| AT5G10430 | 1  | 1  | 0  | 1 | 0 | 1  | 1  | 0         | 1                | 1       |
| AT5G10460 | 0  | 0  | 0  | 0 | 0 | 0  | -1 | 0         | 0                | -1      |
| AT5G10470 | 0  | 0  | -1 | 0 | 0 | 0  | 0  | 0         | 0                | -1      |
| AT5G10510 | -1 | -1 | 0  | 0 | 0 | 0  | 0  | 0         | 0                | -1      |
| AT5G10570 | 0  | 0  | 0  | 0 | 0 | 1  | 0  | 0         | 0                | 1       |
| AT5G10690 | 0  | 0  | 0  | 0 | 0 | 0  | -1 | 0         | 0                | -1      |
| AT5G10740 | 0  | 0  | 0  | 0 | 0 | 0  | 1  | 0         | 0                | 1       |
| AT5G10750 | 0  | 0  | -1 | 0 | 0 | 0  | 0  | 0         | 0                | -1      |
| AT5G10820 | 0  | 0  | -1 | 0 | 0 | 0  | 0  | 0         | 0                | -1      |
| AT5G10830 | 0  | 0  | 0  | 0 | 0 | 0  | 1  | 0         | 0                | 1       |
| AT5G10920 | 0  | 0  | 0  | 0 | 0 | 0  | -1 | 0         | 0                | -1      |
| AT5G10970 | 0  | 0  | 0  | 0 | 0 | 0  | 1  | 0         | 0                | 1       |
| AT5G11000 | 1  | 1  | 1  | 0 | 0 | 1  | 0  | 0         | 0                | 1       |
| AT5G11060 | 0  | 0  | 1  | 1 | 0 | 1  | 0  | 0         | 0                | 1       |
| AT5G11100 | 0  | 0  | 0  | 0 | 0 | 0  | 1  | 0         | 0                | 1       |
| AT5G11140 | 0  | 0  | 0  | 0 | 0 | 0  | 0  | 1         | 0                | 1       |
| AT5G11210 | 0  | 0  | 0  | 0 | 0 | 1  | 0  | 0         | 1                | 1       |
| AT5G11290 | 0  | 0  | 0  | 0 | 0 | 1  | 0  | 0         | 0                | 1       |
| AT5G11300 | 0  | 0  | 0  | 0 | 0 | 1  | 1  | 0         | 0                | 1       |
| AT5G11420 | 0  | 0  | -1 | 0 | 0 | 0  | 0  | 0         | 0                | -1      |
| AT5G11450 | 0  | 0  | 0  | 0 | 0 | 0  | -1 | 0         | 0                | -1      |
| AT5G11460 | 0  | 0  | 0  | 0 | 0 | 0  | -1 | 0         | 0                | -1      |
| AT5G11480 | 0  | 0  | 0  | 0 | 0 | 0  | -1 | 0         | 0                | -1      |

Appendix Table S1

| Name      | 1  | 2  | 3  | 4 | 5 | 6  | 7  | bes1D_Col | bes1Dpif45_pif45 | ALL_BES |
|-----------|----|----|----|---|---|----|----|-----------|------------------|---------|
| AT5G11500 | 0  | 0  | 0  | 0 | 0 | 0  | 1  | 0         | 0                | 1       |
| AT5G11540 | 0  | 0  | 0  | 0 | 0 | 1  | 1  | 0         | 0                | 1       |
| AT5G11670 | 0  | 0  | 0  | 0 | 0 | 0  | 1  | 0         | 0                | 1       |
| AT5G11710 | 0  | 0  | 0  | 0 | 0 | 0  | 1  | 0         | 0                | 1       |
| AT5G11740 | 1  | 1  | 0  | 0 | 0 | 0  | 0  | 0         | 0                | 1       |
| AT5G11790 | 0  | 1  | 0  | 0 | 0 | 0  | 0  | 0         | 0                | 1       |
| AT5G11800 | 0  | 0  | 1  | 0 | 0 | 0  | 0  | 0         | 0                | 1       |
| AT5G11840 | 0  | 0  | 0  | 0 | 0 | 0  | -1 | 0         | 0                | -1      |
| AT5G11850 | 0  | 0  | 0  | 0 | 0 | 0  | 1  | 0         | 0                | 1       |
| AT5G11920 | 0  | 0  | 0  | 0 | 0 | 1  | 0  | 1         | 1                | 1       |
| AT5G11970 | 0  | 0  | 0  | 0 | 0 | 0  | 1  | 0         | 0                | 1       |
| AT5G12020 | 0  | 0  | 0  | 0 | 0 | 0  | 0  | 0         | 1                | 1       |
| AT5G12050 | -1 | -1 | -1 | 0 | 0 | 0  | -1 | 0         | 0                | -1      |
| AT5G12110 | 0  | 0  | -1 | 0 | 0 | -1 | 0  | 0         | 0                | -1      |
| AT5G12130 | 0  | 0  | 0  | 0 | 0 | 0  | -1 | 0         | 0                | -1      |
| AT5G12200 | 0  | 0  | 0  | 0 | 0 | 0  | 1  | 0         | 0                | 1       |
| AT5G12330 | 0  | 0  | 0  | 0 | 0 | -1 | 0  | 0         | 0                | -1      |
| AT5G12410 | 0  | 0  | -1 | 0 | 0 | 0  | 0  | 0         | 0                | -1      |
| AT5G12420 | 0  | 0  | 0  | 0 | 0 | 1  | 0  | 1         | 1                | 1       |
| AT5G12840 | 0  | 0  | 0  | 0 | 0 | 0  | 1  | 0         | 0                | 1       |
| AT5G12860 | 0  | 0  | 0  | 0 | 0 | 0  | -1 | 0         | 0                | -1      |
| AT5G12870 | 0  | 0  | 0  | 0 | 0 | 1  | 0  | 0         | 0                | 1       |
| AT5G12940 | 0  | 0  | 0  | 0 | 0 | 1  | 1  | 0         | 1                | 1       |
| AT5G13000 | 0  | 0  | 0  | 0 | 0 | 0  | -1 | 0         | 0                | -1      |
| AT5G13030 | 0  | 0  | 0  | 0 | 0 | 0  | 1  | 0         | 0                | 1       |
| AT5G13100 | 0  | 0  | 0  | 0 | 0 | 0  | -1 | 0         | 0                | -1      |
| AT5G13140 | 0  | 0  | 0  | 0 | 0 | 0  | -1 | 0         | 0                | -1      |
| AT5G13180 | -1 | -1 | 0  | 0 | 0 | 0  | 0  | 0         | 0                | -1      |
| AT5G13200 | 0  | 0  | 0  | 0 | 0 | 0  | 1  | 0         | 0                | 1       |
| AT5G13280 | 0  | 0  | 0  | 0 | 0 | 0  | -1 | 0         | 0                | -1      |
| AT5G13290 | 0  | 0  | 0  | 0 | 0 | 0  | -1 | 0         | 0                | -1      |
| AT5G13320 | 0  | 0  | 0  | 0 | 0 | 0  | 0  | 1         | 1                | 1       |
| AT5G13330 | 0  | -1 | 0  | 0 | 0 | 0  | 0  | 0         | 0                | -1      |
| AT5G13400 | 1  | 0  | 0  | 0 | 0 | 0  | 0  | 0         | 0                | 1       |
| AT5G13410 | 0  | 0  | 0  | 0 | 0 | 0  | -1 | 0         | 0                | -1      |
| AT5G13420 | 0  | 0  | 0  | 0 | 0 | 0  | 1  | 0         | 0                | 1       |
| AT5G13470 | 0  | 0  | 0  | 0 | 0 | 0  | -1 | 0         | 0                | -1      |
| AT5G13510 | 0  | 0  | 0  | 0 | 0 | 0  | -1 | 0         | 0                | -1      |
| AT5G13580 | 0  | 0  | 0  | 0 | 0 | 1  | 0  | 0         | 1                | 1       |
| AT5G13630 | 0  | 0  | 0  | 0 | 0 | 0  | -1 | 0         | 0                | -1      |
| AT5G13700 | 0  | 0  | 0  | 0 | 0 | 1  | 0  | 0         | 0                | 1       |
| AT5G13720 | 0  | 0  | 0  | 0 | 0 | 0  | -1 | 0         | 0                | -1      |
| AT5G13740 | -1 | 0  | 0  | 0 | 0 | 0  | -1 | 0         | 0                | -1      |
| AT5G13770 | 0  | 0  | -1 | 0 | 0 | 0  | -1 | 0         | 0                | -1      |
| AT5G13780 | 0  | 0  | 0  | 0 | 0 | 0  | -1 | 0         | 0                | -1      |
| AT5G13810 | 0  | 0  | 0  | 0 | 0 | 0  | 1  | 0         | 0                | 1       |
| AT5G13870 | 0  | 0  | 0  | 0 | 0 | 1  | 1  | 0         | 0                | 1       |
| AT5G13900 | 0  | 0  | 0  | 0 | 0 | 0  | 0  | 0         | 1                | 1       |
| AT5G13930 | 0  | 0  | 0  | 0 | 0 | -1 | 0  | 0         | 0                | -1      |
| AT5G14020 | 0  | 0  | 0  | 0 | 0 | -1 | 0  | 0         | 0                | -1      |
| AT5G14070 | 0  | 0  | 0  | 0 | 0 | 0  | 1  | 0         | 0                | 1       |
| AT5G14080 | 0  | 0  | 0  | 0 | 0 | 0  | -1 | 0         | 0                | -1      |
| AT5G14100 | 0  | 0  | 0  | 0 | 0 | 0  | -1 | 0         | 0                | -1      |
| AT5G14130 | 0  | 0  | -1 | 0 | 0 | 0  | 0  | 0         | 0                | -1      |
| AT5G14150 | 0  | 0  | 0  | 0 | 0 | -1 | 0  | 0         | 0                | -1      |
| AT5G14200 | 0  | 0  | 0  | 0 | 0 | 0  | 0  | 0         | 1                | 1       |
| AT5G14230 | 0  | 0  | 0  | 0 | 0 | 0  | -1 | 0         | 0                | -1      |
| AT5G14240 | 0  | 0  | 0  | 0 | 0 | 0  | -1 | 0         | 0                | -1      |
| AT5G14320 | 0  | 0  | 0  | 0 | 0 | 0  | -1 | 0         | 0                | -1      |
| AT5G14330 | 0  | 0  | 0  | 0 | 0 | -1 | 0  | 0         | 0                | -1      |
| AT5G14500 | 0  | 0  | -1 | 0 | 0 | 0  | 0  | 0         | 0                | -1      |

Appendix Table S1

| Name      | 1  | 2  | 3  | 4  | 5 | 6  | 7  | bes1D_Col | bes1Dpif45_pif45 | ALL_BES |
|-----------|----|----|----|----|---|----|----|-----------|------------------|---------|
| AT5G14530 | 0  | 0  | 0  | 0  | 0 | 0  | -1 | 0         | 0                | -1      |
| AT5G14610 | 0  | 0  | 0  | 0  | 0 | 1  | 0  | 0         | 0                | 1       |
| AT5G14620 | 0  | 0  | 0  | 0  | 0 | 0  | -1 | 0         | 0                | -1      |
| AT5G14640 | 0  | 0  | 0  | 0  | 0 | 0  | 1  | 0         | 0                | 1       |
| AT5G14650 | 0  | 0  | -1 | 0  | 0 | 0  | 0  | 0         | 0                | -1      |
| AT5G14720 | 0  | 0  | 0  | 0  | 0 | 0  | 1  | 0         | 0                | 1       |
| AT5G14730 | 1  | 1  | 0  | 0  | 0 | 1  | 0  | 0         | 0                | 1       |
| AT5G14740 | 0  | 0  | 0  | -1 | 0 | 0  | 0  | 0         | 0                | -1      |
| AT5G14750 | 1  | 1  | 0  | 0  | 0 | 0  | 0  | 0         | 0                | 1       |
| AT5G14800 | 0  | 0  | 0  | 0  | 0 | 0  | -1 | 0         | 0                | -1      |
| AT5G14910 | 0  | 0  | 0  | 0  | 0 | 0  | -1 | 0         | 0                | -1      |
| AT5G14920 | 0  | 0  | 0  | 0  | 0 | -1 | -1 | 0         | 0                | -1      |
| AT5G15150 | 0  | 0  | 0  | 0  | 0 | 0  | 1  | 0         | 0                | 1       |
| AT5G15180 | 0  | 1  | 0  | 0  | 0 | 0  | 0  | 0         | 0                | 1       |
| AT5G15290 | 1  | 1  | 0  | 0  | 0 | 0  | 1  | 0         | 0                | 1       |
| AT5G15330 | 0  | 0  | 0  | 0  | 0 | 0  | -1 | 0         | 0                | -1      |
| AT5G15350 | 1  | 1  | 1  | 1  | 0 | 1  | 1  | 0         | 0                | 1       |
| AT5G15390 | 0  | 0  | 0  | 0  | 0 | 0  | -1 | 0         | 0                | -1      |
| AT5G15420 | 0  | 0  | 0  | 0  | 0 | -1 | 0  | 0         | 0                | -1      |
| AT5G15470 | 0  | 1  | 0  | 0  | 0 | 0  | 0  | 0         | 0                | 1       |
| AT5G15510 | 0  | 0  | 0  | 0  | 0 | 1  | 0  | 0         | 0                | 1       |
| AT5G15550 | 0  | 0  | 0  | 0  | 0 | 0  | -1 | 0         | 0                | -1      |
| AT5G15580 | 0  | 0  | 0  | 0  | 0 | 0  | 1  | 0         | 0                | 1       |
| AT5G15740 | -1 | 0  | 0  | 0  | 0 | 0  | -1 | 0         | 0                | -1      |
| AT5G15850 | 0  | 0  | -1 | 0  | 0 | 0  | 0  | 0         | 0                | -1      |
| AT5G15920 | 0  | 0  | 1  | 0  | 0 | 0  | 0  | 0         | 0                | 1       |
| AT5G15950 | 0  | 0  | -1 | 0  | 0 | 0  | 0  | 0         | 0                | -1      |
| AT5G15960 | 0  | 0  | 0  | 0  | 0 | 0  | 0  | -1        | -1               | -1      |
| AT5G15970 | 0  | 0  | 0  | -1 | 0 | 0  | 0  | -1        | -1               | -1      |
| AT5G16010 | 0  | 0  | 0  | 0  | 0 | 0  | -1 | 0         | 0                | -1      |
| AT5G16050 | 0  | 0  | 0  | 0  | 0 | 0  | 1  | 0         | 0                | 1       |
| AT5G16070 | 0  | 0  | 0  | 0  | 0 | 0  | -1 | 0         | 0                | -1      |
| AT5G16080 | 0  | 0  | 0  | 0  | 0 | 1  | 0  | 0         | 0                | 1       |
| AT5G16110 | 0  | 0  | -1 | 0  | 0 | 0  | 0  | 0         | 0                | -1      |
| AT5G16200 | 0  | -1 | 0  | 0  | 0 | 0  | 0  | 0         | 0                | -1      |
| AT5G16210 | 0  | 0  | -1 | 0  | 0 | 0  | 0  | 0         | 0                | -1      |
| AT5G16250 | 0  | 0  | 0  | 0  | 0 | 1  | 0  | 0         | 0                | 1       |
| AT5G16300 | 0  | 0  | 0  | 0  | 0 | 0  | 1  | 0         | 0                | 1       |
| AT5G16350 | 0  | 0  | 0  | 0  | 0 | 1  | 0  | 0         | 0                | 1       |
| AT5G16400 | 0  | 0  | 0  | 0  | 0 | 0  | -1 | 0         | 0                | -1      |
| AT5G16570 | 0  | 0  | 0  | 0  | 0 | 1  | 0  | 0         | 0                | 1       |
| AT5G16590 | 1  | 1  | 1  | 0  | 0 | 1  | 1  | 0         | 0                | 1       |
| AT5G16715 | 0  | 0  | 0  | 0  | 0 | 0  | -1 | 0         | 0                | -1      |
| AT5G16760 | 0  | 0  | -1 | 0  | 0 | 0  | 0  | 0         | 0                | -1      |
| AT5G16810 | 0  | 0  | 0  | 0  | 0 | 0  | -1 | 0         | 0                | -1      |
| AT5G16990 | 0  | 0  | 0  | 1  | 0 | 0  | 0  | 0         | 0                | 1       |
| AT5G17160 | 0  | 0  | 0  | 0  | 0 | 1  | 0  | 0         | 0                | 1       |
| AT5G17170 | 0  | 0  | 0  | 0  | 0 | 0  | -1 | 0         | 0                | -1      |
| AT5G17220 | 0  | 0  | 0  | 0  | 0 | 0  | 0  | 1         | 1                | 1       |
| AT5G17230 | 0  | 0  | 0  | 0  | 0 | 0  | 0  | -1        | 0                | -1      |
| AT5G17270 | 0  | 0  | 0  | 0  | 0 | 1  | 0  | 0         | 0                | 1       |
| AT5G17330 | 0  | 0  | 0  | 0  | 0 | 0  | 1  | 0         | 0                | 1       |
| AT5G17450 | 0  | 0  | 0  | 0  | 0 | -1 | 0  | 0         | 0                | -1      |
| AT5G17520 | 0  | 0  | 0  | 0  | 0 | 0  | -1 | 0         | 0                | -1      |
| AT5G17600 | 0  | 0  | 0  | 0  | 0 | 0  | -1 | 0         | 0                | -1      |
| AT5G17640 | 1  | 1  | 1  | 0  | 0 | 0  | 0  | 0         | 0                | 1       |
| AT5G17670 | 0  | 0  | 0  | 0  | 0 | 0  | -1 | 0         | 0                | -1      |
| AT5G17710 | 0  | 0  | 0  | 0  | 0 | 0  | -1 | 0         | 0                | -1      |
| AT5G17800 | 0  | 0  | 0  | 0  | 0 | -1 | 0  | 0         | 0                | -1      |
| AT5G17860 | -1 | -1 | 0  | 0  | 0 | 0  | 0  | 0         | 0                | -1      |
| AT5G17870 | 0  | 0  | 0  | 0  | 0 | 0  | -1 | 0         | 0                | -1      |

Appendix Table S1

| Name      | 1  | 2  | 3  | 4 | 5 | 6  | 7  | bes1D_Col | bes1Dpif45_pif45 | ALL_BES |
|-----------|----|----|----|---|---|----|----|-----------|------------------|---------|
| AT5G17910 | 0  | 0  | 0  | 0 | 0 | 0  | 1  | 0         | 0                | 1       |
| AT5G17930 | 0  | 0  | -1 | 0 | 0 | 0  | 0  | 0         | 0                | -1      |
| AT5G17960 | 0  | 0  | 0  | 0 | 0 | -1 | 0  | 0         | 0                | -1      |
| AT5G17990 | 0  | 0  | 0  | 0 | 0 | 0  | 0  | 0         | 1                | 1       |
| AT5G18010 | 0  | 0  | 0  | 0 | 0 | 1  | 0  | 0         | 0                | 1       |
| AT5G18020 | 0  | 0  | 0  | 0 | 0 | 1  | 0  | 0         | 0                | 1       |
| AT5G18030 | 0  | 0  | 0  | 0 | 0 | 1  | 0  | 0         | 0                | 1       |
| AT5G18050 | 0  | 0  | 0  | 0 | 0 | 1  | 0  | 0         | 0                | 1       |
| AT5G18060 | 0  | 1  | 0  | 0 | 0 | 1  | 1  | 0         | 0                | 1       |
| AT5G18080 | 0  | 0  | 0  | 0 | 0 | 1  | 0  | 0         | 0                | 1       |
| AT5G18100 | 0  | 0  | 0  | 0 | 0 | 0  | -1 | 0         | 0                | -1      |
| AT5G18130 | 0  | 0  | 0  | 0 | 0 | 0  | 1  | 0         | 0                | 1       |
| AT5G18150 | 0  | 0  | 1  | 0 | 0 | 0  | 0  | 0         | 0                | 1       |
| AT5G18170 | 0  | 0  | 0  | 0 | 0 | 0  | 1  | 0         | 0                | 1       |
| AT5G18200 | 0  | 0  | 0  | 0 | 0 | 0  | -1 | 0         | 0                | -1      |
| AT5G18270 | 0  | 0  | 0  | 0 | 0 | 0  | 1  | 0         | 0                | 1       |
| AT5G18280 | 0  | 1  | 0  | 0 | 0 | 0  | 0  | 0         | 0                | 1       |
| AT5G18460 | 0  | 0  | 0  | 0 | 0 | 0  | 1  | 0         | 0                | 1       |
| AT5G18570 | 0  | 0  | 0  | 0 | 0 | 0  | -1 | 0         | 0                | -1      |
| AT5G18630 | 0  | 0  | 0  | 0 | 0 | 0  | 1  | 0         | 0                | 1       |
| AT5G18660 | 0  | 0  | 0  | 0 | 0 | 0  | -1 | 0         | 0                | -1      |
| AT5G18710 | 0  | 0  | 0  | 0 | 0 | 1  | 0  | 0         | 0                | 1       |
| AT5G18800 | 0  | 0  | 0  | 0 | 0 | 0  | -1 | 0         | 0                | -1      |
| AT5G18830 | 0  | 0  | 0  | 0 | 0 | 0  | 1  | 0         | 0                | 1       |
| AT5G18840 | 0  | 0  | 0  | 0 | 0 | 1  | 0  | 0         | 0                | 1       |
| AT5G18970 | 0  | 0  | 0  | 0 | 0 | 0  | 1  | 0         | 0                | 1       |
| AT5G19030 | 0  | 0  | 0  | 0 | 0 | 0  | -1 | 0         | 0                | -1      |
| AT5G19100 | 0  | 0  | 0  | 0 | 0 | 1  | 0  | 0         | 0                | 1       |
| AT5G19150 | 0  | 0  | 0  | 0 | 0 | 0  | -1 | 0         | 0                | -1      |
| AT5G19200 | 0  | 0  | 0  | 0 | 0 | 0  | -1 | 0         | 0                | -1      |
| AT5G19210 | 0  | 0  | 0  | 0 | 0 | 0  | -1 | 0         | 0                | -1      |
| AT5G19230 | 0  | 0  | 0  | 0 | 0 | 1  | 0  | 0         | 0                | 1       |
| AT5G19240 | 1  | 0  | 0  | 0 | 0 | 1  | 1  | 1         | 1                | 1       |
| AT5G19250 | 0  | 0  | 0  | 0 | 0 | 0  | 1  | 0         | 1                | 1       |
| AT5G19370 | 0  | 0  | 0  | 0 | 0 | 0  | -1 | 0         | 0                | -1      |
| AT5G19400 | 0  | 0  | 0  | 0 | 0 | 0  | 1  | 0         | 0                | 1       |
| AT5G19410 | 0  | 0  | 0  | 0 | 0 | 0  | 0  | 0         | 1                | 1       |
| AT5G19440 | -1 | -1 | 0  | 0 | 0 | 0  | 0  | 0         | 0                | -1      |
| AT5G19520 | 0  | 0  | 0  | 0 | 0 | -1 | 0  | 0         | 0                | -1      |
| AT5G19590 | 0  | 0  | 0  | 0 | 0 | 0  | 1  | 0         | 0                | 1       |
| AT5G19600 | 0  | 0  | 0  | 0 | 0 | 1  | 0  | 0         | 0                | 1       |
| AT5G19730 | 0  | 0  | 0  | 0 | 0 | 0  | -1 | 0         | 0                | -1      |
| AT5G19770 | 0  | 0  | 0  | 0 | 0 | 0  | 1  | 0         | 0                | 1       |
| AT5G19780 | 0  | 0  | 0  | 0 | 0 | 0  | 1  | 0         | 0                | 1       |
| AT5G19790 | 0  | 0  | 0  | 0 | 0 | -1 | 0  | 0         | 0                | -1      |
| AT5G19810 | 0  | 0  | 0  | 0 | 0 | 1  | 0  | 0         | 0                | 1       |
| AT5G19850 | 0  | 0  | 0  | 0 | 0 | 0  | -1 | 0         | 0                | -1      |
| AT5G19870 | 0  | 0  | 0  | 0 | 0 | 1  | 0  | 0         | 0                | 1       |
| AT5G19940 | 0  | 0  | 0  | 0 | 0 | 0  | -1 | 0         | 0                | -1      |
| AT5G19970 | 0  | 0  | 0  | 0 | 0 | 0  | 1  | 0         | 0                | 1       |
| AT5G20070 | 0  | 0  | -1 | 0 | 0 | 0  | 0  | 0         | 0                | -1      |
| AT5G20110 | 1  | 1  | 1  | 0 | 0 | 0  | 0  | 0         | 0                | 1       |
| AT5G20130 | 0  | 0  | 0  | 0 | 0 | 0  | -1 | 0         | 0                | -1      |
| AT5G20150 | 0  | 0  | 0  | 0 | 0 | 0  | 1  | 0         | 0                | 1       |
| AT5G20220 | 0  | 0  | 0  | 0 | 0 | 0  | -1 | 0         | 0                | -1      |
| AT5G20230 | 0  | 0  | 0  | 1 | 0 | 1  | 0  | 1         | 1                | 1       |
| AT5G20250 | 0  | 0  | 0  | 0 | 0 | 0  | 0  | 1         | 0                | 1       |
| AT5G20270 | 1  | 1  | 0  | 0 | 0 | 1  | 1  | 0         | 0                | 1       |
| AT5G20410 | 0  | 0  | 0  | 0 | 0 | 1  | 0  | 0         | 0                | 1       |
| AT5G20470 | 0  | 0  | 0  | 0 | 0 | 0  | 1  | 0         | 0                | 1       |
| AT5G20490 | 0  | 0  | 0  | 0 | 0 | 0  | 1  | 0         | 0                | 1       |

Appendix Table S1

| Name      | 1  | 2  | 3  | 4  | 5 | 6  | 7  | bes1D_Col | bes1Dpif45_pif45 | ALL_BES |
|-----------|----|----|----|----|---|----|----|-----------|------------------|---------|
| AT5G20550 | 0  | 0  | 0  | 0  | 0 | 0  | 1  | 0         | 0                | 1       |
| AT5G20630 | 0  | 0  | 0  | 0  | 0 | 0  | -1 | 0         | 0                | -1      |
| AT5G20690 | 0  | 0  | 0  | 0  | 0 | 1  | 0  | 0         | 0                | 1       |
| AT5G20700 | 0  | 0  | 0  | 0  | 0 | 0  | 1  | 0         | 0                | 1       |
| AT5G20710 | 0  | 0  | 0  | 0  | 0 | 0  | 1  | 0         | 0                | 1       |
| AT5G20720 | 0  | 0  | 0  | 0  | 0 | 0  | -1 | 0         | 0                | -1      |
| AT5G20935 | 0  | 0  | -1 | 0  | 0 | 0  | -1 | 0         | 0                | -1      |
| AT5G20950 | -1 | -1 | 0  | 0  | 0 | 0  | 0  | 0         | 0                | -1      |
| AT5G20960 | 0  | 0  | 0  | 0  | 0 | 0  | 1  | 0         | 1                | 1       |
| AT5G20970 | 0  | 0  | 0  | 0  | 0 | 0  | 0  | 0         | 1                | 1       |
| AT5G21326 | 0  | 0  | 0  | 0  | 0 | 0  | 0  | 0         | 1                | 1       |
| AT5G21430 | 0  | 0  | 0  | 0  | 0 | 0  | 0  | -1        | 0                | -1      |
| AT5G22270 | -1 | -1 | 0  | 0  | 0 | 0  | 0  | 0         | 0                | -1      |
| AT5G22300 | 0  | 0  | 0  | 0  | 0 | 0  | 0  | 0         | 1                | 1       |
| AT5G22340 | 0  | 0  | 0  | 0  | 0 | 0  | -1 | 0         | 0                | -1      |
| AT5G22355 | 0  | 0  | 0  | 0  | 0 | 1  | 0  | 0         | 0                | 1       |
| AT5G22370 | 0  | 0  | 0  | 0  | 0 | 0  | -1 | 0         | 0                | -1      |
| AT5G22410 | 0  | 0  | 0  | 0  | 0 | -1 | 0  | 0         | 0                | -1      |
| AT5G22470 | 0  | 0  | 0  | 0  | 0 | -1 | 0  | 0         | 0                | -1      |
| AT5G22500 | -1 | -1 | 0  | -1 | 0 | 0  | 0  | 0         | 0                | -1      |
| AT5G22520 | 0  | 0  | 0  | 0  | 0 | 0  | 0  | 1         | 0                | 1       |
| AT5G22555 | 0  | 0  | 0  | 0  | 0 | 0  | 0  | 1         | 1                | 1       |
| AT5G22570 | 0  | 0  | 0  | 0  | 0 | 0  | 0  | 0         | 1                | 1       |
| AT5G22580 | -1 | -1 | -1 | 0  | 0 | -1 | -1 | -1        | -1               | -1      |
| AT5G22730 | 0  | 0  | 0  | 0  | 0 | 0  | -1 | 0         | 0                | -1      |
| AT5G22860 | 0  | 0  | 0  | 0  | 0 | 0  | 1  | 0         | 0                | 1       |
| AT5G22870 | 0  | 0  | 0  | 0  | 0 | 0  | 1  | 0         | 0                | 1       |
| AT5G22875 | 0  | 0  | -1 | 0  | 0 | 0  | -1 | 0         | 0                | -1      |
| AT5G22880 | 0  | 0  | 0  | 0  | 0 | 0  | 1  | 0         | 0                | 1       |
| AT5G22910 | 0  | 0  | 0  | 0  | 0 | 0  | 0  | 0         | 1                | 1       |
| AT5G22920 | 1  | 0  | 0  | 0  | 0 | 0  | 0  | 0         | 0                | 1       |
| AT5G22940 | 1  | 1  | 1  | 0  | 0 | 0  | 0  | 0         | 0                | 1       |
| AT5G23010 | -1 | 0  | 0  | 0  | 0 | 0  | 0  | 0         | 0                | -1      |
| AT5G23020 | 0  | 0  | 0  | 0  | 0 | -1 | -1 | 0         | 0                | -1      |
| AT5G23060 | 0  | 0  | 0  | 0  | 0 | 0  | -1 | -1        | 0                | -1      |
| AT5G23120 | 0  | 0  | 0  | 0  | 0 | 0  | -1 | 0         | 0                | -1      |
| AT5G23140 | 0  | 0  | 0  | 0  | 0 | 0  | -1 | 0         | 0                | -1      |
| AT5G23190 | 0  | 0  | 0  | 0  | 0 | 0  | 0  | 1         | 1                | 1       |
| AT5G23220 | -1 | -1 | -1 | 0  | 0 | 0  | 0  | 0         | 0                | -1      |
| AT5G23270 | 0  | 0  | 0  | 1  | 0 | 0  | 0  | 0         | 0                | 1       |
| AT5G23290 | 0  | 0  | 0  | 0  | 0 | 0  | -1 | 0         | 0                | -1      |
| AT5G23310 | 0  | 0  | 0  | -1 | 0 | 0  | -1 | 0         | 0                | -1      |
| AT5G23350 | 0  | 0  | 0  | 0  | 0 | 1  | 0  | 0         | 0                | 1       |
| AT5G23360 | 0  | 0  | 0  | 0  | 0 | 1  | 0  | 0         | 0                | 1       |
| AT5G23380 | 0  | 0  | 0  | 0  | 0 | 0  | -1 | 0         | 0                | -1      |
| AT5G23400 | 0  | 0  | 0  | 0  | 0 | 1  | 1  | 0         | 1                | 1       |
| AT5G23440 | 0  | 0  | 0  | 0  | 0 | 0  | -1 | 0         | 0                | -1      |
| AT5G23700 | 0  | 0  | 0  | 0  | 0 | 1  | 0  | 0         | 0                | 1       |
| AT5G23740 | 0  | 0  | 0  | 0  | 0 | 0  | -1 | 0         | 0                | -1      |
| AT5G23750 | 0  | 0  | 0  | 0  | 0 | 1  | 1  | 0         | 0                | 1       |
| AT5G23830 | 0  | 0  | 0  | 0  | 0 | -1 | 0  | 0         | 0                | -1      |
| AT5G23840 | 0  | 0  | 0  | 0  | 0 | -1 | 0  | 0         | 0                | -1      |
| AT5G23850 | 0  | 0  | 1  | 0  | 0 | 0  | 0  | 0         | 0                | 1       |
| AT5G23860 | 1  | 1  | 0  | 1  | 0 | 1  | 1  | 0         | 0                | 1       |
| AT5G23900 | 0  | 0  | 0  | 0  | 0 | 0  | -1 | 0         | 0                | -1      |
| AT5G23910 | 0  | 0  | 0  | 0  | 0 | 1  | 0  | 0         | 0                | 1       |
| AT5G23940 | 0  | 0  | 0  | 0  | 0 | 0  | -1 | 0         | 0                | -1      |
| AT5G23950 | 0  | 0  | 0  | 0  | 0 | 1  | 0  | 0         | 0                | 1       |
| AT5G23980 | 0  | 0  | 0  | 0  | 0 | -1 | 0  | 0         | 0                | -1      |
| AT5G24070 | -1 | -1 | 0  | 0  | 0 | 0  | 0  | 0         | 0                | -1      |
| AT5G24100 | 0  | 0  | 0  | 0  | 0 | 1  | 0  | 0         | 0                | 1       |

Appendix Table S1

| Name      | 1 | 2 | 3 | 4 | 5 | 6  | 7  | bes1D_Col | bes1Dpif45_pif45 | ALL_BES |
|-----------|---|---|---|---|---|----|----|-----------|------------------|---------|
| AT5G24105 | 0 | 0 | 0 | 0 | 0 | 1  | 0  | 0         | 0                | 1       |
| AT5G24110 | 0 | 0 | 0 | 0 | 0 | 0  | 0  | 0         | 1                | 1       |
| AT5G24120 | 0 | 0 | 0 | 0 | 0 | 0  | 0  | -1        | 0                | -1      |
| AT5G24140 | 0 | 0 | 0 | 0 | 0 | 0  | 0  | -1        | 0                | -1      |
| AT5G24240 | 0 | 0 | 0 | 0 | 0 | 1  | 0  | 0         | 0                | 1       |
| AT5G24270 | 0 | 0 | 0 | 0 | 0 | 1  | 0  | 0         | 0                | 1       |
| AT5G24290 | 0 | 0 | 0 | 0 | 0 | 0  | 1  | 0         | 0                | 1       |
| AT5G24313 | 0 | 0 | 0 | 0 | 0 | -1 | 0  | 0         | 0                | -1      |
| AT5G24410 | 0 | 0 | 0 | 0 | 0 | -1 | 0  | 0         | 0                | -1      |
| AT5G24530 | 0 | 0 | 0 | 0 | 0 | 0  | 1  | 0         | 0                | 1       |
| AT5G24570 | 1 | 1 | 1 | 0 | 0 | 0  | 0  | 0         | 0                | 1       |
| AT5G24580 | 1 | 1 | 1 | 0 | 0 | 1  | 1  | 0         | 0                | 1       |
| AT5G24610 | 0 | 0 | 0 | 0 | 0 | 0  | -1 | 0         | 0                | -1      |
| AT5G24770 | 0 | 0 | 0 | 0 | 0 | -1 | 0  | -1        | -1               | -1      |
| AT5G24780 | 0 | 0 | 0 | 0 | 0 | 0  | 0  | -1        | -1               | -1      |
| AT5G24870 | 0 | 0 | 0 | 0 | 0 | 1  | 0  | 0         | 0                | 1       |
| AT5G24970 | 0 | 0 | 0 | 0 | 0 | 0  | -1 | 0         | 0                | -1      |
| AT5G24990 | 0 | 0 | 0 | 0 | 0 | 1  | 0  | 0         | 0                | 1       |
| AT5G25020 | 0 | 0 | 0 | 0 | 0 | 1  | 0  | 0         | 0                | 1       |
| AT5G25110 | 0 | 0 | 1 | 0 | 0 | 1  | 0  | 0         | 0                | 1       |
| AT5G25120 | 0 | 0 | 0 | 0 | 0 | 1  | 0  | 0         | 0                | 1       |
| AT5G25130 | 0 | 0 | 0 | 0 | 0 | 1  | 0  | 0         | 0                | 1       |
| AT5G25140 | 0 | 0 | 0 | 0 | 0 | 1  | 0  | 0         | 0                | 1       |
| AT5G25160 | 0 | 0 | 0 | 0 | 0 | 0  | 1  | 0         | 0                | 1       |
| AT5G25170 | 1 | 1 | 1 | 0 | 0 | 0  | 0  | 0         | 0                | 1       |
| AT5G25205 | 0 | 0 | 0 | 0 | 0 | -1 | 0  | 0         | 0                | -1      |
| AT5G25240 | 1 | 1 | 0 | 0 | 0 | 0  | 0  | 0         | 0                | 1       |
| AT5G25250 | 0 | 0 | 0 | 0 | 0 | 1  | 0  | 1         | 1                | 1       |
| AT5G25260 | 0 | 0 | 0 | 0 | 0 | 1  | 0  | 1         | 1                | 1       |
| AT5G25460 | 0 | 0 | 0 | 0 | 0 | 0  | 1  | 0         | 0                | 1       |
| AT5G25470 | 0 | 0 | 0 | 0 | 0 | 0  | -1 | 0         | 0                | -1      |
| AT5G25475 | 0 | 0 | 0 | 0 | 0 | 0  | -1 | 0         | 0                | -1      |
| AT5G25490 | 0 | 0 | 0 | 0 | 0 | 0  | -1 | 0         | 0                | -1      |
| AT5G25610 | 0 | 0 | 0 | 0 | 0 | 1  | 0  | 0         | 0                | 1       |
| AT5G25750 | 0 | 0 | 0 | 0 | 0 | 0  | -1 | 0         | 0                | -1      |
| AT5G25770 | 0 | 0 | 0 | 0 | 0 | 0  | 1  | 0         | 0                | 1       |
| AT5G25820 | 0 | 0 | 0 | 0 | 0 | 0  | 1  | 0         | 0                | 1       |
| AT5G25840 | 0 | 0 | 0 | 0 | 0 | 0  | -1 | 0         | 0                | -1      |
| AT5G25980 | 0 | 0 | 0 | 0 | 0 | -1 | 0  | 0         | 0                | -1      |
| AT5G26147 | 0 | 0 | 0 | 0 | 0 | 1  | 0  | 0         | 0                | 1       |
| AT5G26230 | 0 | 0 | 0 | 0 | 0 | 0  | -1 | 0         | 0                | -1      |
| AT5G26310 | 0 | 0 | 0 | 0 | 0 | 0  | 1  | 0         | 0                | 1       |
| AT5G26330 | 0 | 0 | 0 | 0 | 0 | 1  | 0  | 0         | 0                | 1       |
| AT5G26690 | 0 | 0 | 0 | 0 | 0 | 0  | 0  | 1         | 1                | 1       |
| AT5G26800 | 0 | 0 | 0 | 0 | 0 | -1 | 0  | 0         | 0                | -1      |
| AT5G26820 | 0 | 0 | 0 | 0 | 0 | 0  | -1 | 0         | 0                | -1      |
| AT5G26920 | 0 | 0 | 0 | 0 | 0 | 0  | 0  | 1         | 1                | 1       |
| AT5G26930 | 0 | 0 | 0 | 0 | 0 | 1  | 0  | 0         | 0                | 1       |
| AT5G26970 | 0 | 0 | 0 | 0 | 0 | 1  | 0  | 0         | 0                | 1       |
| AT5G26980 | 0 | 0 | 0 | 0 | 0 | -1 | 0  | 0         | 0                | -1      |
| AT5G27100 | 0 | 0 | 0 | 0 | 0 | -1 | 0  | 0         | 0                | -1      |
| AT5G27110 | 0 | 0 | 0 | 0 | 0 | -1 | 0  | 0         | 0                | -1      |
| AT5G27120 | 0 | 0 | 0 | 0 | 0 | 0  | 1  | 0         | 0                | 1       |
| AT5G27140 | 0 | 0 | 0 | 0 | 0 | 0  | 1  | 0         | 0                | 1       |
| AT5G27200 | 0 | 0 | 0 | 0 | 0 | 1  | 0  | 0         | 0                | 1       |
| AT5G27220 | 0 | 0 | 0 | 0 | 0 | 1  | 0  | 0         | 0                | 1       |
| AT5G27230 | 0 | 0 | 0 | 0 | 0 | 1  | 0  | 0         | 0                | 1       |
| AT5G27240 | 0 | 0 | 0 | 0 | 0 | -1 | 0  | 0         | 0                | -1      |
| AT5G27247 | 0 | 0 | 0 | 0 | 0 | -1 | 0  | 0         | 0                | -1      |
| AT5G27250 | 0 | 0 | 0 | 0 | 0 | -1 | 0  | 0         | 0                | -1      |
| AT5G27345 | 0 | 0 | 0 | 0 | 0 | 1  | 0  | 0         | 0                | 1       |



Appendix Table S1

| Name      | 1  | 2  | 3  | 4 | 5 | 6  | 7  | bes1D_Col | bes1Dpif45_pif45 | ALL_BES |
|-----------|----|----|----|---|---|----|----|-----------|------------------|---------|
| AT5G27350 | 0  | 0  | 0  | 0 | 0 | 1  | 0  | 0         | 0                | 1       |
| AT5G27420 | 0  | 1  | 0  | 0 | 0 | 1  | 0  | 0         | 0                | 1       |
| AT5G27560 | 0  | 0  | 0  | 0 | 0 | 0  | -1 | 0         | 0                | -1      |
| AT5G27590 | 0  | 0  | 0  | 0 | 0 | 1  | 0  | 0         | 0                | 1       |
| AT5G27660 | 0  | 0  | 0  | 0 | 0 | 1  | 0  | 0         | 0                | 1       |
| AT5G27670 | -1 | -1 | -1 | 0 | 0 | 0  | 0  | 0         | 0                | -1      |
| AT5G27780 | 0  | 0  | 0  | 0 | 0 | 1  | 1  | 0         | 0                | 1       |
| AT5G27889 | 0  | 0  | 0  | 0 | 0 | -1 | 0  | 0         | 0                | -1      |
| AT5G27890 | 0  | 0  | 0  | 0 | 0 | -1 | 0  | 0         | 0                | -1      |
| AT5G27895 | 0  | 0  | 0  | 0 | 0 | -1 | 0  | 0         | 0                | -1      |
| AT5G27920 | 0  | 0  | 0  | 0 | 0 | 1  | 0  | 0         | 0                | 1       |
| AT5G27927 | 0  | 0  | 0  | 0 | 0 | 1  | 0  | 0         | 0                | 1       |
| AT5G27950 | 0  | 0  | 0  | 0 | 0 | 1  | 0  | 0         | 0                | 1       |
| AT5G27990 | 0  | 0  | 0  | 0 | 0 | -1 | 0  | 0         | 0                | -1      |
| AT5G28010 | 0  | 0  | 0  | 0 | 0 | 1  | 0  | 0         | 0                | 1       |
| AT5G28030 | 0  | 0  | 0  | 0 | 0 | 1  | 0  | 0         | 0                | 1       |
| AT5G28050 | 0  | 0  | 0  | 0 | 0 | -1 | 0  | 0         | 0                | -1      |
| AT5G28060 | 0  | 0  | 0  | 0 | 0 | -1 | -1 | 0         | 0                | -1      |
| AT5G28145 | 0  | 0  | 0  | 0 | 0 | -1 | 0  | 0         | 0                | -1      |
| AT5G28150 | 0  | 0  | 0  | 0 | 0 | 1  | 0  | 0         | 0                | 1       |
| AT5G28220 | 0  | 0  | -1 | 0 | 0 | 0  | 0  | 0         | 0                | -1      |
| AT5G28230 | 0  | 0  | 0  | 0 | 0 | 1  | 0  | 0         | 0                | 1       |
| AT5G28262 | 0  | 0  | 0  | 0 | 0 | -1 | 0  | 0         | 0                | -1      |
| AT5G28263 | 0  | 0  | 0  | 0 | 0 | -1 | 0  | 0         | 0                | -1      |
| AT5G28350 | 0  | 0  | 0  | 0 | 0 | -1 | 0  | 0         | 0                | -1      |
| AT5G28360 | 0  | 0  | 0  | 0 | 0 | -1 | 0  | 0         | 0                | -1      |
| AT5G28415 | 0  | 0  | 0  | 0 | 0 | -1 | 0  | 0         | 0                | -1      |
| AT5G28450 | 0  | 0  | 0  | 0 | 0 | 0  | -1 | 0         | 0                | -1      |
| AT5G28463 | 0  | 0  | 0  | 0 | 0 | 1  | 0  | 0         | 0                | 1       |
| AT5G28500 | 0  | 0  | 0  | 0 | 0 | 0  | -1 | 0         | 0                | -1      |
| AT5G28610 | 0  | 0  | 0  | 0 | 0 | -1 | 0  | 0         | 0                | -1      |
| AT5G28622 | 0  | 0  | 0  | 0 | 0 | -1 | 0  | 0         | 0                | -1      |
| AT5G28630 | 0  | 0  | 0  | 0 | 0 | 1  | 0  | 1         | 0                | 1       |
| AT5G28640 | 0  | 0  | 0  | 0 | 0 | 0  | -1 | 0         | 0                | -1      |
| AT5G28660 | 0  | 0  | 0  | 0 | 0 | 1  | 0  | 0         | 0                | 1       |
| AT5G28673 | 0  | 0  | 0  | 0 | 0 | 1  | 0  | 0         | 0                | 1       |
| AT5G28910 | 0  | 0  | 0  | 0 | 0 | 1  | 0  | 0         | 0                | 1       |
| AT5G28919 | 0  | 0  | 0  | 0 | 0 | -1 | 0  | 0         | 0                | -1      |
| AT5G29624 | 0  | 0  | 0  | 0 | 0 | 1  | 0  | 0         | 0                | 1       |
| AT5G30510 | 0  | 0  | 0  | 0 | 0 | 0  | -1 | 0         | 0                | -1      |
| AT5G32460 | 0  | 0  | 0  | 0 | 0 | 1  | 0  | 0         | 0                | 1       |
| AT5G33207 | 0  | 0  | 0  | 0 | 0 | 1  | 0  | 0         | 0                | 1       |
| AT5G33280 | 0  | 0  | 0  | 0 | 0 | 0  | -1 | 0         | 0                | -1      |
| AT5G33290 | 0  | 0  | 0  | 0 | 0 | 0  | 1  | 0         | 0                | 1       |
| AT5G33340 | 0  | 0  | 0  | 0 | 0 | -1 | 0  | 0         | 0                | -1      |
| AT5G33355 | 0  | 0  | 0  | 0 | 0 | -1 | -1 | 0         | 0                | -1      |
| AT5G33390 | 0  | 0  | 0  | 0 | 0 | -1 | 0  | 0         | 0                | -1      |
| AT5G33395 | 0  | 0  | 0  | 0 | 0 | -1 | 0  | 0         | 0                | -1      |
| AT5G34795 | 0  | 0  | 0  | 0 | 0 | -1 | 0  | 0         | 0                | -1      |
| AT5G34825 | 0  | 0  | 0  | 0 | 0 | -1 | 0  | 0         | 0                | -1      |
| AT5G34871 | 0  | 0  | 0  | 0 | 0 | -1 | 0  | 0         | 0                | -1      |
| AT5G35100 | 0  | 0  | 0  | 0 | 0 | 0  | -1 | 0         | 0                | -1      |
| AT5G35110 | 0  | 0  | 0  | 0 | 0 | 1  | 0  | 0         | 0                | 1       |
| AT5G35170 | 0  | 0  | 0  | 0 | 0 | 0  | -1 | 0         | 0                | -1      |
| AT5G35190 | 0  | 0  | 0  | 0 | 0 | -1 | 0  | 0         | 0                | -1      |
| AT5G35200 | 0  | 0  | 0  | 0 | 0 | 0  | 1  | 0         | 0                | 1       |
| AT5G35360 | 0  | 0  | 0  | 0 | 0 | 0  | 1  | 0         | 0                | 1       |
| AT5G35370 | 0  | 0  | 0  | 0 | 0 | 0  | 1  | 0         | 0                | 1       |
| AT5G35450 | 0  | 0  | 0  | 0 | 0 | -1 | 0  | 0         | 0                | -1      |
| AT5G35460 | 0  | 0  | 0  | 0 | 0 | 1  | 0  | 0         | 0                | 1       |
| AT5G35480 | 0  | 0  | 0  | 0 | 0 | 0  | -1 | 0         | 0                | -1      |

Appendix Table S1

| Name      | 1  | 2  | 3  | 4 | 5 | 6  | 7  | bes1D_Col | bes1Dpif45_pif45 | ALL_BES |
|-----------|----|----|----|---|---|----|----|-----------|------------------|---------|
| AT5G35530 | 0  | 0  | 0  | 0 | 0 | 0  | -1 | 0         | 0                | -1      |
| AT5G35630 | 0  | 0  | 0  | 0 | 0 | 0  | -1 | 0         | 0                | -1      |
| AT5G35660 | 0  | 0  | 0  | 0 | 0 | -1 | 0  | 0         | 0                | -1      |
| AT5G35700 | 0  | 0  | -1 | 0 | 0 | 0  | 0  | 0         | 0                | -1      |
| AT5G35735 | 0  | 0  | 0  | 0 | 0 | 1  | 1  | 0         | 0                | 1       |
| AT5G35796 | 0  | 0  | 0  | 0 | 0 | 1  | 0  | 0         | 0                | 1       |
| AT5G35914 | 0  | 0  | 0  | 0 | 0 | -1 | 0  | 0         | 0                | -1      |
| AT5G35932 | 0  | 0  | 0  | 0 | 0 | -1 | 0  | 0         | 0                | -1      |
| AT5G35935 | 0  | 0  | 0  | 0 | 0 | -1 | 0  | 0         | -1               | -1      |
| AT5G35940 | -1 | 0  | 0  | 0 | 0 | 0  | 0  | 0         | 0                | -1      |
| AT5G35980 | 0  | 0  | 0  | 0 | 0 | 0  | 1  | 0         | 0                | 1       |
| AT5G36150 | 0  | 0  | 0  | 0 | 0 | -1 | 0  | 0         | 0                | -1      |
| AT5G36180 | 0  | 0  | 0  | 0 | 0 | 0  | 1  | 0         | 0                | 1       |
| AT5G36220 | 0  | 0  | 0  | 0 | 0 | -1 | 0  | 0         | 0                | -1      |
| AT5G36240 | 0  | 0  | 0  | 0 | 0 | 1  | 0  | 0         | 0                | 1       |
| AT5G36260 | 0  | 0  | 0  | 0 | 0 | 1  | 0  | 0         | 0                | 1       |
| AT5G36700 | 0  | 0  | 0  | 0 | 0 | 0  | -1 | 0         | 0                | -1      |
| AT5G36790 | 0  | 0  | 0  | 0 | 0 | 0  | -1 | 0         | 0                | -1      |
| AT5G36870 | 0  | 0  | 0  | 0 | 0 | 1  | 0  | 0         | 0                | 1       |
| AT5G36910 | -1 | -1 | 0  | 0 | 0 | 0  | 0  | 0         | 0                | -1      |
| AT5G36925 | 0  | 0  | 0  | 0 | 0 | 0  | 0  | 1         | 0                | 1       |
| AT5G36930 | 0  | 0  | 0  | 0 | 0 | -1 | 0  | 0         | 0                | -1      |
| AT5G36940 | 0  | 0  | 0  | 0 | 0 | 1  | 0  | 0         | 0                | 1       |
| AT5G37020 | -1 | -1 | 0  | 0 | 0 | 0  | 0  | 0         | 0                | -1      |
| AT5G37130 | 0  | 0  | 0  | 0 | 0 | 1  | 0  | 0         | 0                | 1       |
| AT5G37210 | 0  | 0  | 0  | 0 | 0 | 1  | 0  | 0         | 0                | 1       |
| AT5G37250 | 0  | 0  | 0  | 0 | 0 | 1  | 0  | 0         | 0                | 1       |
| AT5G37300 | 0  | 0  | 0  | 0 | 0 | 1  | 0  | 0         | 0                | 1       |
| AT5G37360 | 0  | 0  | 0  | 0 | 0 | 0  | -1 | 0         | 0                | -1      |
| AT5G37370 | 0  | 0  | -1 | 0 | 0 | 0  | 0  | 0         | 0                | -1      |
| AT5G37420 | 0  | 0  | 0  | 0 | 0 | 1  | 0  | 0         | 0                | 1       |
| AT5G37440 | 0  | 0  | 0  | 0 | 0 | -1 | 0  | 0         | 0                | -1      |
| AT5G37450 | 0  | 0  | 0  | 0 | 0 | -1 | 0  | 0         | 0                | -1      |
| AT5G37485 | 0  | 0  | 0  | 0 | 0 | -1 | 0  | 0         | 0                | -1      |
| AT5G37490 | 0  | 0  | 0  | 0 | 0 | 0  | 0  | 1         | 0                | 1       |
| AT5G37500 | 0  | 0  | 0  | 0 | 0 | 1  | 0  | 0         | 0                | 1       |
| AT5G37600 | 0  | 0  | 0  | 0 | 0 | 0  | 1  | 0         | 0                | 1       |
| AT5G37740 | 0  | 0  | 0  | 0 | 0 | 0  | 1  | 0         | 0                | 1       |
| AT5G37770 | 1  | 1  | 1  | 1 | 0 | 0  | 0  | 0         | 0                | 1       |
| AT5G37780 | 0  | 0  | 0  | 0 | 0 | 0  | 1  | 0         | 0                | 1       |
| AT5G37790 | 0  | 0  | 0  | 0 | 0 | 0  | 1  | 0         | 0                | 1       |
| AT5G37840 | 0  | 0  | 0  | 0 | 0 | 1  | 0  | 1         | 1                | 1       |
| AT5G37890 | 0  | 0  | 0  | 0 | 0 | 0  | -1 | 0         | 0                | -1      |
| AT5G37940 | 0  | 0  | 0  | 0 | 0 | 0  | 0  | -1        | 0                | -1      |
| AT5G37950 | 0  | 0  | 0  | 0 | 0 | 0  | 1  | 0         | 0                | 1       |
| AT5G37990 | 0  | 0  | 0  | 0 | 0 | -1 | 0  | 0         | 0                | -1      |
| AT5G38000 | 0  | 0  | 0  | 0 | 0 | -1 | 0  | -1        | 0                | -1      |
| AT5G38010 | 0  | 0  | 0  | 0 | 0 | 0  | 1  | 0         | 0                | 1       |
| AT5G38020 | 0  | 0  | 0  | 0 | 0 | -1 | 0  | -1        | 0                | -1      |
| AT5G38030 | 0  | 0  | 0  | 0 | 0 | -1 | 0  | 0         | 0                | -1      |
| AT5G38050 | 0  | 0  | 0  | 0 | 0 | 1  | 0  | 0         | 0                | 1       |
| AT5G38100 | 0  | 0  | 0  | 0 | 0 | -1 | 0  | 0         | 0                | -1      |
| AT5G38200 | 0  | 0  | 0  | 0 | 0 | 0  | 0  | 0         | 1                | 1       |
| AT5G38230 | 0  | 0  | 0  | 0 | 0 | -1 | 0  | 0         | 0                | -1      |
| AT5G38250 | 0  | 0  | 0  | 0 | 0 | 1  | 0  | 0         | 0                | 1       |
| AT5G38260 | 0  | 0  | 0  | 0 | 0 | 1  | 0  | 0         | 0                | 1       |
| AT5G38290 | 0  | 0  | 0  | 0 | 0 | 0  | -1 | 0         | 0                | -1      |
| AT5G38300 | 0  | 0  | 0  | 0 | 0 | 1  | 0  | 0         | 0                | 1       |
| AT5G38344 | 0  | 0  | 0  | 0 | 0 | -1 | 0  | 0         | 0                | -1      |
| AT5G38350 | 0  | 0  | 0  | 0 | 0 | -1 | 0  | 0         | 0                | -1      |
| AT5G38430 | 0  | 0  | 0  | 0 | 0 | 0  | 0  | -1        | 0                | -1      |

Appendix Table S1

| Name      | 1 | 2  | 3  | 4  | 5 | 6  | 7  | bes1D_Col | bes1Dpif45_pif45 | ALL_BES |
|-----------|---|----|----|----|---|----|----|-----------|------------------|---------|
| AT5G38520 | 0 | 0  | 0  | 0  | 0 | 0  | -1 | 0         | 0                | -1      |
| AT5G38530 | 0 | 0  | 0  | 0  | 0 | 0  | 1  | 0         | 0                | 1       |
| AT5G38550 | 0 | 0  | 0  | 0  | 0 | 1  | 0  | 0         | 0                | 1       |
| AT5G38590 | 0 | 0  | 0  | 0  | 0 | 1  | 0  | 0         | 0                | 1       |
| AT5G38660 | 0 | 0  | 0  | 0  | 0 | 0  | -1 | 0         | 0                | -1      |
| AT5G38710 | 0 | 0  | 0  | 0  | 0 | 1  | 0  | 1         | 1                | 1       |
| AT5G38790 | 0 | 0  | 0  | 0  | 0 | 1  | 0  | 0         | 0                | 1       |
| AT5G38900 | 0 | 0  | 0  | 0  | 0 | 1  | 0  | 1         | 1                | 1       |
| AT5G38910 | 0 | 0  | 0  | 0  | 0 | 0  | 0  | 1         | 1                | 1       |
| AT5G38940 | 0 | 0  | 0  | 0  | 0 | 0  | -1 | 0         | 0                | -1      |
| AT5G38970 | 0 | 0  | 0  | 0  | 0 | -1 | 0  | 0         | 0                | -1      |
| AT5G38980 | 0 | 0  | 0  | 0  | 0 | -1 | -1 | 0         | 0                | -1      |
| AT5G39030 | 0 | 0  | 0  | 0  | 0 | 1  | 0  | 0         | 0                | 1       |
| AT5G39060 | 0 | 0  | 0  | 0  | 0 | -1 | 0  | 0         | 0                | -1      |
| AT5G39070 | 0 | 0  | 0  | 0  | 0 | 1  | 0  | 0         | 0                | 1       |
| AT5G39080 | 0 | 0  | 0  | 0  | 0 | 0  | -1 | 0         | 0                | -1      |
| AT5G39130 | 0 | 0  | 0  | 0  | 0 | -1 | -1 | 0         | 0                | -1      |
| AT5G39150 | 0 | 0  | 0  | 0  | 0 | -1 | 0  | 0         | 0                | -1      |
| AT5G39160 | 0 | 0  | 0  | 0  | 0 | -1 | -1 | 0         | 0                | -1      |
| AT5G39190 | 0 | 0  | 0  | 0  | 0 | -1 | -1 | 0         | 0                | -1      |
| AT5G39240 | 0 | 0  | 0  | 0  | 0 | 0  | 0  | 1         | 0                | 1       |
| AT5G39260 | 0 | 0  | 0  | 0  | 0 | -1 | 0  | 0         | 0                | -1      |
| AT5G39320 | 0 | 0  | 0  | 0  | 0 | 1  | 1  | 0         | 0                | 1       |
| AT5G39380 | 0 | 0  | 0  | 0  | 0 | 1  | 0  | 0         | 0                | 1       |
| AT5G39400 | 0 | 0  | 0  | 0  | 0 | 1  | 0  | 0         | 0                | 1       |
| AT5G39471 | 0 | 0  | 0  | 0  | 0 | -1 | 0  | 0         | 0                | -1      |
| AT5G39510 | 0 | 0  | 0  | 0  | 0 | 0  | 1  | 0         | 0                | 1       |
| AT5G39520 | 0 | 0  | 0  | 0  | 0 | 1  | 0  | 0         | 0                | 1       |
| AT5G39580 | 0 | 0  | 0  | 1  | 0 | 1  | 0  | 0         | 0                | 1       |
| AT5G39600 | 0 | 0  | 0  | 0  | 0 | 0  | -1 | 0         | 0                | -1      |
| AT5G39610 | 0 | 0  | -1 | 0  | 0 | 0  | 0  | 0         | 0                | -1      |
| AT5G39640 | 0 | 0  | 0  | 0  | 0 | 1  | 0  | 0         | 0                | 1       |
| AT5G39670 | 0 | 0  | 0  | 0  | 0 | 0  | 0  | 1         | 0                | 1       |
| AT5G39770 | 0 | 0  | 0  | 0  | 0 | 1  | 0  | 0         | 0                | 1       |
| AT5G39860 | 0 | 0  | 0  | 0  | 0 | 0  | 1  | 0         | 0                | 1       |
| AT5G39970 | 0 | 0  | 0  | 0  | 0 | 1  | 0  | 0         | 1                | 1       |
| AT5G40000 | 0 | 0  | 0  | 0  | 0 | 0  | 0  | 0         | 1                | 1       |
| AT5G40010 | 0 | 0  | 0  | 0  | 0 | 1  | 0  | 0         | 0                | 1       |
| AT5G40020 | 0 | 0  | 0  | 0  | 0 | 1  | 0  | 0         | 0                | 1       |
| AT5G40160 | 0 | 0  | 0  | -1 | 0 | 0  | 0  | 0         | 0                | -1      |
| AT5G40170 | 0 | 0  | -1 | 0  | 0 | 0  | 0  | 0         | 0                | -1      |
| AT5G40380 | 1 | 1  | 0  | 0  | 0 | 0  | 0  | 0         | 0                | 1       |
| AT5G40420 | 0 | 0  | 0  | 0  | 0 | -1 | 0  | 0         | 0                | -1      |
| AT5G40480 | 0 | 0  | -1 | 0  | 0 | 0  | 0  | 0         | 0                | -1      |
| AT5G40500 | 0 | 0  | 0  | 0  | 0 | -1 | 0  | 0         | 0                | -1      |
| AT5G40570 | 0 | 0  | 0  | 0  | 0 | 1  | 0  | 0         | 0                | 1       |
| AT5G40590 | 0 | 0  | 0  | 0  | 0 | 1  | 0  | 0         | 1                | 1       |
| AT5G40610 | 0 | 0  | 0  | 0  | 0 | -1 | 0  | 0         | 0                | -1      |
| AT5G40630 | 0 | 0  | 0  | 0  | 0 | -1 | 0  | -1        | 0                | -1      |
| AT5G40670 | 0 | 0  | 0  | 0  | 0 | 0  | 1  | 0         | 0                | 1       |
| AT5G40690 | 0 | 0  | 0  | 0  | 0 | 1  | 1  | 0         | 0                | 1       |
| AT5G40730 | 0 | 0  | 0  | 0  | 0 | 1  | 1  | 0         | 0                | 1       |
| AT5G40760 | 0 | 0  | 0  | 0  | 0 | 0  | 1  | 0         | 0                | 1       |
| AT5G40780 | 0 | 0  | 0  | 0  | 0 | 1  | 0  | 0         | 0                | 1       |
| AT5G40850 | 0 | -1 | -1 | 0  | 0 | 0  | 0  | 0         | 0                | -1      |
| AT5G40890 | 1 | 1  | 0  | 0  | 0 | 0  | 1  | 0         | 0                | 1       |
| AT5G40910 | 0 | 0  | 0  | 0  | 0 | -1 | 0  | 0         | 0                | -1      |
| AT5G40950 | 0 | 0  | 0  | 0  | 0 | 0  | -1 | 0         | 0                | -1      |
| AT5G40990 | 0 | 0  | 0  | 0  | 0 | 0  | 0  | 1         | 1                | 1       |
| AT5G41040 | 0 | 0  | 0  | 0  | 0 | 1  | 1  | 0         | 0                | 1       |
| AT5G41050 | 0 | 0  | 0  | 0  | 0 | 0  | -1 | 0         | 0                | -1      |

Appendix Table S1

| Name      | 1  | 2  | 3  | 4 | 5 | 6  | 7  | bes1D_Col | bes1Dpif45_pif45 | ALL_BES |
|-----------|----|----|----|---|---|----|----|-----------|------------------|---------|
| AT5G41080 | 1  | 1  | 0  | 0 | 0 | 1  | 1  | 0         | 0                | 1       |
| AT5G41260 | 0  | 0  | 0  | 0 | 0 | 0  | 1  | 0         | 0                | 1       |
| AT5G41315 | 0  | 0  | 0  | 0 | 0 | -1 | 0  | 0         | 0                | -1      |
| AT5G41350 | 0  | 0  | 0  | 0 | 0 | 0  | 1  | 0         | 0                | 1       |
| AT5G41410 | 0  | 0  | 0  | 0 | 0 | 1  | 1  | 0         | 0                | 1       |
| AT5G41600 | -1 | -1 | -1 | 0 | 0 | 0  | 0  | 0         | 0                | -1      |
| AT5G41650 | 0  | 0  | 0  | 0 | 0 | 0  | -1 | 0         | 0                | -1      |
| AT5G41740 | 0  | 0  | 0  | 0 | 0 | 1  | 0  | 1         | 1                | 1       |
| AT5G41750 | 0  | 0  | 0  | 0 | 0 | 1  | 0  | 1         | 1                | 1       |
| AT5G41800 | 0  | 0  | 0  | 0 | 0 | 0  | 1  | 0         | 0                | 1       |
| AT5G41830 | 0  | 0  | 0  | 0 | 0 | 1  | 0  | 0         | 0                | 1       |
| AT5G41900 | 1  | 1  | 0  | 0 | 0 | 1  | 1  | 1         | 0                | 1       |
| AT5G41920 | 0  | 0  | 0  | 0 | 0 | 0  | -1 | 0         | 0                | -1      |
| AT5G41970 | 0  | 0  | 0  | 0 | 0 | 0  | -1 | 0         | 0                | -1      |
| AT5G41990 | 0  | 0  | 0  | 0 | 0 | 0  | 1  | 0         | 0                | 1       |
| AT5G42030 | 0  | 0  | 0  | 0 | 0 | 0  | 1  | 0         | 0                | 1       |
| AT5G42070 | 0  | 0  | 0  | 0 | 0 | 0  | -1 | 0         | 0                | -1      |
| AT5G42150 | 0  | 0  | -1 | 0 | 0 | 0  | 0  | 0         | 0                | -1      |
| AT5G42180 | 0  | 0  | 0  | 0 | 0 | 1  | 1  | 0         | 0                | 1       |
| AT5G42210 | 0  | 0  | 0  | 0 | 0 | 1  | 0  | 0         | 0                | 1       |
| AT5G42240 | 0  | 0  | 0  | 0 | 0 | 0  | -1 | 0         | 0                | -1      |
| AT5G42250 | 0  | 0  | 0  | 0 | 0 | 0  | 1  | 0         | 0                | 1       |
| AT5G42270 | 0  | 0  | 0  | 0 | 0 | 0  | -1 | 0         | 0                | -1      |
| AT5G42280 | 0  | 0  | 0  | 0 | 0 | -1 | 0  | 0         | 0                | -1      |
| AT5G42330 | 0  | 0  | 0  | 0 | 0 | 1  | 0  | 0         | 0                | 1       |
| AT5G42380 | 0  | 0  | 0  | 0 | 0 | 0  | 0  | 1         | 0                | 1       |
| AT5G42460 | 0  | 0  | 0  | 0 | 0 | -1 | -1 | 0         | 0                | -1      |
| AT5G42500 | 0  | 0  | 0  | 0 | 0 | 1  | 1  | 0         | 0                | 1       |
| AT5G42510 | 0  | 0  | 0  | 0 | 0 | 0  | 1  | 0         | 0                | 1       |
| AT5G42530 | 0  | 0  | 0  | 0 | 0 | 1  | 0  | 1         | 1                | 1       |
| AT5G42580 | 0  | 0  | 0  | 0 | 0 | -1 | 0  | 0         | 0                | -1      |
| AT5G42590 | 0  | 0  | 0  | 0 | 0 | -1 | 0  | -1        | 0                | -1      |
| AT5G42600 | 0  | 0  | 0  | 0 | 0 | -1 | 0  | -1        | 0                | -1      |
| AT5G42620 | 0  | 0  | 0  | 0 | 0 | 0  | 1  | 0         | 0                | 1       |
| AT5G42630 | 0  | -1 | 0  | 0 | 0 | -1 | 0  | 0         | 0                | -1      |
| AT5G42650 | -1 | -1 | 0  | 0 | 0 | 0  | 0  | 0         | 0                | -1      |
| AT5G42655 | 0  | 0  | 0  | 0 | 0 | 1  | 0  | 0         | 0                | 1       |
| AT5G42660 | 0  | 0  | 0  | 0 | 0 | 1  | 0  | 0         | 0                | 1       |
| AT5G42700 | 0  | 0  | 0  | 0 | 0 | 1  | 0  | 0         | 0                | 1       |
| AT5G42750 | 0  | 0  | -1 | 0 | 0 | 0  | 0  | 0         | 0                | -1      |
| AT5G42760 | 0  | 0  | 0  | 0 | 0 | -1 | 0  | 0         | 0                | -1      |
| AT5G42810 | 0  | 0  | -1 | 0 | 0 | 0  | 0  | 0         | 0                | -1      |
| AT5G42825 | 0  | 0  | 0  | 0 | 0 | -1 | 0  | 0         | 0                | -1      |
| AT5G42830 | 0  | 0  | 0  | 0 | 0 | 0  | 0  | 1         | 1                | 1       |
| AT5G42860 | 0  | 0  | 0  | 0 | 0 | 0  | 1  | 0         | 0                | 1       |
| AT5G42930 | 0  | 0  | 0  | 0 | 0 | 1  | 0  | 0         | 0                | 1       |
| AT5G42990 | -1 | 0  | 0  | 0 | 0 | 0  | -1 | 0         | 0                | -1      |
| AT5G43030 | 0  | 0  | 0  | 0 | 0 | -1 | 0  | 0         | 0                | -1      |
| AT5G43040 | 0  | 0  | 0  | 0 | 0 | -1 | 0  | 0         | 0                | -1      |
| AT5G43050 | 0  | 0  | 0  | 0 | 0 | -1 | 0  | 0         | 0                | -1      |
| AT5G43060 | 0  | 0  | 0  | 0 | 0 | 1  | 1  | 0         | 0                | 1       |
| AT5G43330 | 0  | 0  | -1 | 0 | 0 | 0  | 0  | 0         | 0                | -1      |
| AT5G43360 | 0  | 0  | 0  | 0 | 0 | 1  | 0  | 0         | 0                | 1       |
| AT5G43370 | 0  | 0  | 0  | 0 | 0 | 1  | 0  | 0         | 0                | 1       |
| AT5G43403 | 0  | 0  | 0  | 0 | 0 | -1 | 0  | 0         | 0                | -1      |
| AT5G43440 | 0  | 0  | 0  | 0 | 0 | -1 | 0  | 0         | 0                | -1      |
| AT5G43450 | 0  | 0  | 0  | 0 | 0 | 0  | 0  | 0         | 1                | 1       |
| AT5G43500 | 0  | 0  | 0  | 0 | 0 | 1  | 0  | 0         | 0                | 1       |
| AT5G43570 | 0  | 0  | 0  | 0 | 0 | 1  | 0  | 0         | 0                | 1       |
| AT5G43580 | 0  | 0  | 0  | 0 | 0 | 1  | 0  | 0         | 0                | 1       |
| AT5G43660 | 0  | 0  | 0  | 0 | 0 | 1  | 0  | 0         | 0                | 1       |

Appendix Table S1

| Name      | 1  | 2 | 3  | 4 | 5 | 6  | 7  | bes1D_Col | bes1Dpif45_pif45 | ALL_BES |
|-----------|----|---|----|---|---|----|----|-----------|------------------|---------|
| AT5G43700 | 0  | 0 | 1  | 0 | 0 | 0  | 0  | 0         | 0                | 1       |
| AT5G43745 | 0  | 0 | 0  | 0 | 0 | -1 | 0  | 0         | 0                | -1      |
| AT5G43750 | 0  | 0 | 0  | 0 | 0 | 0  | -1 | 0         | 0                | -1      |
| AT5G43760 | 1  | 1 | 1  | 0 | 0 | 1  | 1  | 0         | 0                | 1       |
| AT5G43780 | 0  | 0 | 0  | 0 | 0 | 0  | 1  | 0         | 0                | 1       |
| AT5G43810 | 0  | 0 | 0  | 0 | 0 | 0  | -1 | 0         | 0                | -1      |
| AT5G43870 | -1 | 0 | 0  | 0 | 0 | 0  | 0  | 0         | 0                | -1      |
| AT5G43880 | 0  | 0 | 0  | 0 | 0 | 0  | 1  | 0         | 0                | 1       |
| AT5G43900 | 0  | 0 | 0  | 0 | 0 | 0  | 1  | 0         | 0                | 1       |
| AT5G44020 | 0  | 1 | 0  | 0 | 0 | 0  | 0  | 0         | 0                | 1       |
| AT5G44050 | 1  | 0 | 0  | 0 | 0 | 0  | 0  | 0         | 0                | 1       |
| AT5G44060 | 1  | 1 | 1  | 0 | 0 | 1  | 1  | 0         | 0                | 1       |
| AT5G44070 | 0  | 0 | 0  | 0 | 0 | 0  | 1  | 0         | 0                | 1       |
| AT5G44120 | 0  | 0 | 0  | 0 | 0 | -1 | 0  | 0         | 0                | -1      |
| AT5G44130 | 0  | 0 | 0  | 0 | 0 | 1  | 1  | 0         | 1                | 1       |
| AT5G44190 | 0  | 0 | 0  | 0 | 0 | 0  | -1 | 0         | 0                | -1      |
| AT5G44220 | 0  | 0 | 0  | 0 | 0 | 1  | 0  | 0         | 0                | 1       |
| AT5G44260 | 0  | 0 | 0  | 0 | 0 | 0  | -1 | 0         | 0                | -1      |
| AT5G44290 | 0  | 0 | 0  | 0 | 0 | 0  | 1  | 0         | 0                | 1       |
| AT5G44310 | 0  | 0 | 0  | 0 | 0 | -1 | 0  | 0         | 0                | -1      |
| AT5G44380 | 0  | 0 | 0  | 0 | 0 | 1  | 1  | 0         | 0                | 1       |
| AT5G44390 | 0  | 0 | 0  | 0 | 0 | 1  | 0  | 0         | 0                | 1       |
| AT5G44450 | 0  | 0 | 0  | 0 | 0 | 0  | -1 | 0         | 0                | -1      |
| AT5G44520 | 0  | 0 | 0  | 0 | 0 | 0  | -1 | 0         | 0                | -1      |
| AT5G44550 | 0  | 0 | 0  | 0 | 0 | 1  | 0  | 1         | 1                | 1       |
| AT5G44560 | 0  | 0 | 0  | 0 | 0 | 1  | 0  | 0         | 0                | 1       |
| AT5G44562 | 0  | 0 | 0  | 0 | 0 | 1  | 0  | 0         | 0                | 1       |
| AT5G44565 | 0  | 0 | 0  | 0 | 0 | 1  | 0  | 0         | 0                | 1       |
| AT5G44568 | 0  | 0 | 0  | 0 | 0 | 1  | 0  | 1         | 1                | 1       |
| AT5G44572 | 0  | 0 | 0  | 0 | 0 | 1  | 0  | 1         | 0                | 1       |
| AT5G44574 | 0  | 0 | 0  | 0 | 0 | 0  | 0  | 1         | 1                | 1       |
| AT5G44575 | 0  | 0 | 0  | 0 | 0 | 0  | 0  | 1         | 1                | 1       |
| AT5G44582 | 0  | 0 | 0  | 0 | 0 | -1 | 0  | 0         | 0                | -1      |
| AT5G44585 | 0  | 0 | 0  | 0 | 0 | 0  | 0  | 1         | 0                | 1       |
| AT5G44610 | 0  | 0 | 0  | 0 | 0 | 1  | 1  | 0         | 0                | 1       |
| AT5G44670 | 1  | 1 | 1  | 0 | 0 | 1  | 1  | 0         | 0                | 1       |
| AT5G44680 | 1  | 1 | 0  | 0 | 0 | 0  | 0  | 0         | 0                | 1       |
| AT5G44690 | 0  | 0 | 0  | 0 | 0 | 1  | 0  | 0         | 0                | 1       |
| AT5G44700 | 0  | 0 | 0  | 0 | 0 | 0  | 0  | 0         | 1                | 1       |
| AT5G44730 | 0  | 0 | 0  | 0 | 0 | 0  | -1 | 0         | 0                | -1      |
| AT5G44870 | 0  | 0 | -1 | 0 | 0 | 0  | 0  | 0         | 0                | -1      |
| AT5G44875 | 0  | 0 | 0  | 0 | 0 | 1  | 0  | 0         | 0                | 1       |
| AT5G44920 | 0  | 0 | 0  | 0 | 0 | -1 | 0  | 0         | 0                | -1      |
| AT5G44980 | 0  | 0 | 0  | 0 | 0 | -1 | 0  | 0         | 0                | -1      |
| AT5G44990 | 0  | 0 | 0  | 0 | 0 | 0  | 0  | 1         | 1                | 1       |
| AT5G45040 | 0  | 0 | 0  | 0 | 0 | 0  | -1 | 0         | 0                | -1      |
| AT5G45080 | 0  | 0 | 0  | 0 | 0 | -1 | 0  | 0         | 0                | -1      |
| AT5G45090 | 0  | 0 | 0  | 0 | 0 | 0  | 0  | 1         | 0                | 1       |
| AT5G45113 | 0  | 0 | 0  | 0 | 0 | 1  | 0  | 0         | 0                | 1       |
| AT5G45210 | 0  | 0 | 0  | 0 | 0 | 1  | 1  | 0         | 0                | 1       |
| AT5G45220 | 0  | 0 | 0  | 0 | 0 | -1 | 0  | 0         | 0                | -1      |
| AT5G45280 | 0  | 0 | 0  | 0 | 0 | 1  | 1  | 0         | 0                | 1       |
| AT5G45390 | 0  | 0 | 0  | 0 | 0 | 0  | -1 | 0         | 0                | -1      |
| AT5G45410 | 0  | 0 | 0  | 0 | 0 | 0  | 1  | 0         | 0                | 1       |
| AT5G45460 | 0  | 0 | 0  | 0 | 0 | -1 | 0  | 0         | 0                | -1      |
| AT5G45490 | 0  | 0 | 0  | 0 | 0 | -1 | 0  | 0         | 0                | -1      |
| AT5G45530 | 0  | 0 | 0  | 0 | 0 | -1 | 0  | 0         | 0                | -1      |
| AT5G45670 | 1  | 1 | 1  | 0 | 1 | 1  | 1  | 0         | 1                | 1       |
| AT5G45680 | 0  | 0 | 0  | 0 | 0 | 0  | -1 | 0         | 0                | -1      |
| AT5G45690 | 0  | 0 | 0  | 0 | 0 | -1 | 0  | 0         | 0                | -1      |
| AT5G45700 | 0  | 0 | 0  | 0 | 0 | 1  | 0  | 0         | 0                | 1       |

Appendix Table S1

| Name      | 1  | 2  | 3  | 4 | 5 | 6  | 7  | bes1D_Col | bes1Dpif45_pif45 | ALL_BES |
|-----------|----|----|----|---|---|----|----|-----------|------------------|---------|
| AT5G45820 | -1 | 0  | 0  | 0 | 0 | 0  | 0  | 0         | 0                | -1      |
| AT5G45950 | 0  | 1  | 1  | 0 | 0 | 1  | 1  | 0         | 0                | 1       |
| AT5G46040 | 0  | 0  | 0  | 0 | 0 | 1  | 0  | 0         | 0                | 1       |
| AT5G46050 | 0  | 0  | 0  | 0 | 0 | 1  | 0  | 0         | 0                | 1       |
| AT5G46060 | 0  | 0  | 0  | 0 | 0 | 1  | 0  | 0         | 0                | 1       |
| AT5G46110 | 0  | 0  | 0  | 0 | 0 | 0  | -1 | 0         | 0                | -1      |
| AT5G46270 | 0  | 0  | 0  | 0 | 0 | 1  | 0  | 0         | 0                | 1       |
| AT5G46295 | 0  | 0  | 0  | 0 | 0 | 0  | 0  | 1         | 0                | 1       |
| AT5G46330 | -1 | -1 | 0  | 0 | 0 | 0  | -1 | 0         | 0                | -1      |
| AT5G46350 | 0  | 0  | 0  | 0 | 0 | 0  | 0  | 0         | 1                | 1       |
| AT5G46450 | 0  | 0  | -1 | 0 | 0 | 0  | 0  | 0         | 0                | -1      |
| AT5G46490 | 0  | 0  | 0  | 0 | 0 | 1  | 0  | 0         | 0                | 1       |
| AT5G46500 | 0  | 0  | 0  | 0 | 0 | 1  | 0  | 0         | 0                | 1       |
| AT5G46510 | 0  | 0  | 0  | 0 | 0 | -1 | 0  | 0         | 0                | -1      |
| AT5G46520 | 0  | 0  | 0  | 0 | 0 | -1 | 0  | 0         | 0                | -1      |
| AT5G46580 | 0  | 0  | 0  | 0 | 0 | 0  | -1 | 0         | 0                | -1      |
| AT5G46590 | 1  | 1  | 1  | 0 | 0 | 1  | 1  | 0         | 1                | 1       |
| AT5G46670 | 0  | 0  | 0  | 0 | 0 | 1  | 0  | 0         | 0                | 1       |
| AT5G46710 | 0  | 0  | 0  | 0 | 0 | 0  | -1 | 0         | 0                | -1      |
| AT5G46730 | 0  | 0  | 0  | 0 | 0 | 1  | 0  | 0         | 0                | 1       |
| AT5G46760 | 0  | 0  | 0  | 0 | 0 | 0  | 1  | 0         | 0                | 1       |
| AT5G46790 | 0  | 0  | 1  | 0 | 0 | 0  | 0  | 0         | 0                | 1       |
| AT5G46800 | 0  | 0  | 0  | 0 | 0 | 0  | -1 | 0         | 0                | -1      |
| AT5G46880 | 0  | 0  | 0  | 0 | 0 | 1  | 0  | 0         | 0                | 1       |
| AT5G46900 | 0  | 0  | 0  | 0 | 0 | 0  | 1  | 0         | 0                | 1       |
| AT5G46940 | 0  | 0  | 0  | 0 | 0 | 1  | 0  | 0         | 0                | 1       |
| AT5G46950 | 0  | 0  | 0  | 0 | 0 | 1  | 0  | 1         | 1                | 1       |
| AT5G47050 | 0  | 0  | 0  | 0 | 0 | 1  | 0  | 0         | 0                | 1       |
| AT5G47100 | 0  | 0  | 0  | 0 | 0 | 1  | 0  | 0         | 0                | 1       |
| AT5G47190 | 0  | 0  | 0  | 0 | 0 | 0  | -1 | 0         | 0                | -1      |
| AT5G47200 | 0  | 0  | 0  | 0 | 0 | 0  | 1  | 0         | 0                | 1       |
| AT5G47220 | 0  | 0  | 0  | 0 | 0 | 0  | 0  | 1         | 0                | 1       |
| AT5G47240 | 0  | 0  | 0  | 0 | 0 | 1  | 0  | 0         | 0                | 1       |
| AT5G47370 | 0  | 0  | 0  | 0 | 0 | 0  | 1  | 0         | 0                | 1       |
| AT5G47380 | -1 | -1 | 0  | 0 | 0 | 0  | 0  | 0         | 0                | -1      |
| AT5G47435 | 0  | 0  | 0  | 0 | 0 | 0  | -1 | 0         | 0                | -1      |
| AT5G47450 | 0  | 0  | 0  | 0 | 0 | 1  | 1  | 0         | 0                | 1       |
| AT5G47480 | 0  | 0  | 0  | 0 | 0 | 0  | 1  | 0         | 0                | 1       |
| AT5G47540 | 1  | 1  | 1  | 0 | 0 | 0  | 0  | 0         | 0                | 1       |
| AT5G47550 | 1  | 1  | 0  | 0 | 0 | 0  | 1  | 0         | 0                | 1       |
| AT5G47560 | 0  | 0  | 0  | 0 | 0 | 0  | 1  | 0         | 0                | 1       |
| AT5G47590 | 0  | 0  | 0  | 0 | 0 | 0  | 0  | 1         | 0                | 1       |
| AT5G47610 | 0  | 0  | 0  | 0 | 0 | 0  | -1 | 0         | 0                | -1      |
| AT5G47650 | 0  | -1 | 0  | 0 | 0 | 0  | 0  | 0         | 0                | -1      |
| AT5G47730 | 0  | 0  | 0  | 0 | 0 | 0  | 1  | 0         | 0                | 1       |
| AT5G47740 | 0  | 0  | 0  | 0 | 0 | 1  | 0  | 0         | 0                | 1       |
| AT5G47770 | 0  | 0  | 0  | 0 | 0 | 0  | 1  | 0         | 0                | 1       |
| AT5G47810 | 0  | 0  | 0  | 0 | 0 | 0  | -1 | 0         | 0                | -1      |
| AT5G47830 | 0  | 0  | 0  | 0 | 0 | 0  | -1 | 0         | 0                | -1      |
| AT5G47840 | 0  | 0  | 0  | 0 | 0 | 0  | -1 | 0         | 0                | -1      |
| AT5G47890 | 0  | 0  | 0  | 0 | 0 | 0  | -1 | 0         | 0                | -1      |
| AT5G47910 | 0  | 0  | 0  | 0 | 0 | 0  | 1  | 0         | 1                | 1       |
| AT5G47950 | 0  | 0  | 0  | 0 | 0 | -1 | 0  | -1        | 0                | -1      |
| AT5G47960 | 0  | 0  | 0  | 0 | 0 | 0  | 1  | 0         | 0                | 1       |
| AT5G47980 | 0  | 0  | 0  | 0 | 0 | -1 | 0  | -1        | 0                | -1      |
| AT5G48090 | 0  | 0  | 0  | 0 | 0 | 1  | 0  | 0         | 0                | 1       |
| AT5G48220 | 0  | 0  | 0  | 0 | 0 | 0  | -1 | 0         | 0                | -1      |
| AT5G48290 | 0  | 0  | 0  | 0 | 0 | 1  | 0  | 0         | 0                | 1       |
| AT5G48310 | 0  | 0  | 0  | 0 | 0 | 1  | 0  | 0         | 0                | 1       |
| AT5G48350 | 0  | 0  | 0  | 0 | 0 | 1  | 0  | 0         | 0                | 1       |
| AT5G48380 | 0  | 0  | 0  | 0 | 0 | 0  | 1  | 0         | 0                | 1       |

Appendix Table S1

| Name      | 1  | 2  | 3  | 4 | 5 | 6  | 7  | bes1D_Col | bes1Dpif45_pif45 | ALL_BES |
|-----------|----|----|----|---|---|----|----|-----------|------------------|---------|
| AT5G48450 | 1  | 1  | 0  | 0 | 0 | 0  | 0  | 0         | 0                | 1       |
| AT5G48460 | 0  | 0  | 0  | 0 | 0 | 0  | 1  | 0         | 0                | 1       |
| AT5G48485 | 0  | 0  | 0  | 0 | 0 | 0  | -1 | 0         | 0                | -1      |
| AT5G48540 | 0  | 0  | 0  | 0 | 0 | 1  | 0  | 1         | 1                | 1       |
| AT5G48560 | 0  | 0  | 0  | 0 | 0 | 0  | 1  | 0         | 0                | 1       |
| AT5G48650 | 0  | 0  | 0  | 0 | 0 | -1 | 0  | 0         | 0                | -1      |
| AT5G48657 | 0  | 0  | 0  | 0 | 0 | 0  | 0  | 0         | 1                | 1       |
| AT5G48670 | 0  | 0  | 0  | 0 | 0 | 1  | 0  | 0         | 0                | 1       |
| AT5G48740 | 0  | 0  | 0  | 0 | 0 | 1  | 0  | 0         | 0                | 1       |
| AT5G48790 | 0  | 0  | 0  | 0 | 0 | 0  | -1 | 0         | 0                | -1      |
| AT5G48810 | 0  | 0  | 0  | 0 | 0 | 0  | -1 | 0         | 0                | -1      |
| AT5G48870 | 0  | 0  | 1  | 0 | 0 | 0  | 0  | 0         | 0                | 1       |
| AT5G48930 | 0  | 0  | -1 | 0 | 0 | 0  | 0  | 0         | 0                | -1      |
| AT5G48940 | 0  | 0  | 0  | 0 | 0 | -1 | 0  | 0         | 0                | -1      |
| AT5G48970 | 0  | 0  | -1 | 0 | 0 | 0  | 0  | 0         | 0                | -1      |
| AT5G49030 | 0  | 0  | 0  | 0 | 0 | 0  | -1 | 0         | 0                | -1      |
| AT5G49100 | -1 | -1 | -1 | 0 | 0 | 0  | 0  | 0         | 0                | -1      |
| AT5G49160 | 0  | 0  | 0  | 0 | 0 | 0  | -1 | 0         | 0                | -1      |
| AT5G49230 | 0  | 0  | -1 | 0 | 0 | 0  | 0  | 0         | 0                | -1      |
| AT5G49270 | 0  | 0  | 0  | 0 | 0 | -1 | 0  | 0         | 0                | -1      |
| AT5G49360 | 0  | 0  | 0  | 0 | 0 | 0  | 1  | 0         | 0                | 1       |
| AT5G49480 | 0  | 0  | -1 | 0 | 0 | 0  | 0  | 0         | 0                | -1      |
| AT5G49520 | 0  | 0  | 0  | 0 | 0 | 1  | 0  | 0         | 1                | 1       |
| AT5G49550 | 0  | 0  | 0  | 0 | 0 | 0  | -1 | 0         | 0                | -1      |
| AT5G49555 | 0  | 0  | 0  | 0 | 0 | 0  | -1 | 0         | 0                | -1      |
| AT5G49580 | 0  | 0  | 0  | 0 | 0 | 0  | 1  | 0         | 0                | 1       |
| AT5G49630 | 0  | 0  | 0  | 1 | 0 | 0  | 0  | 0         | 0                | 1       |
| AT5G49690 | 0  | 0  | 0  | 0 | 0 | 0  | 0  | 0         | 1                | 1       |
| AT5G49710 | 0  | 0  | 0  | 0 | 0 | 0  | 1  | 0         | 0                | 1       |
| AT5G49850 | 0  | 0  | 0  | 0 | 0 | 1  | 0  | 1         | 0                | 1       |
| AT5G49890 | 0  | 0  | 0  | 0 | 0 | 0  | 1  | 0         | 0                | 1       |
| AT5G50000 | 0  | 0  | 0  | 0 | 0 | 0  | 1  | 0         | 0                | 1       |
| AT5G50010 | 0  | 0  | 0  | 0 | 0 | 0  | 0  | -1        | -1               | -1      |
| AT5G50130 | 0  | 0  | 0  | 0 | 0 | -1 | 0  | 0         | 0                | -1      |
| AT5G50200 | 0  | 0  | 0  | 0 | 0 | 1  | 0  | 0         | 0                | 1       |
| AT5G50210 | 0  | 0  | -1 | 0 | 0 | 0  | 0  | 0         | 0                | -1      |
| AT5G50250 | 0  | 0  | 0  | 0 | 0 | 0  | -1 | 0         | 0                | -1      |
| AT5G50270 | 0  | 0  | 0  | 0 | 0 | 1  | 0  | 0         | 0                | 1       |
| AT5G50300 | 0  | 0  | 0  | 0 | 0 | -1 | 0  | 0         | 0                | -1      |
| AT5G50335 | 1  | 1  | 1  | 0 | 0 | 0  | 0  | 1         | 0                | 1       |
| AT5G50430 | 0  | 0  | 0  | 0 | 0 | 0  | 1  | 0         | 0                | 1       |
| AT5G50450 | 0  | 0  | 0  | 0 | 0 | 0  | -1 | 0         | 0                | -1      |
| AT5G50550 | 0  | 0  | 0  | 0 | 0 | -1 | 0  | 0         | 0                | -1      |
| AT5G50560 | 0  | 0  | 0  | 0 | 0 | -1 | 0  | 0         | 0                | -1      |
| AT5G50565 | 0  | 0  | 0  | 0 | 0 | -1 | 0  | 0         | 0                | -1      |
| AT5G50580 | 0  | 0  | 0  | 0 | 0 | -1 | -1 | 0         | 0                | -1      |
| AT5G50600 | 0  | 0  | 0  | 0 | 0 | -1 | 0  | 0         | 0                | -1      |
| AT5G50650 | 0  | 0  | 0  | 0 | 0 | -1 | 0  | 0         | 0                | -1      |
| AT5G50660 | 0  | 0  | 0  | 0 | 0 | -1 | 0  | 0         | 0                | -1      |
| AT5G50670 | 0  | 0  | 0  | 0 | 0 | -1 | 0  | 0         | 0                | -1      |
| AT5G50680 | 0  | 0  | 0  | 0 | 0 | -1 | -1 | 0         | 0                | -1      |
| AT5G50700 | 0  | 0  | 0  | 0 | 0 | -1 | 0  | 0         | 0                | -1      |
| AT5G50750 | 0  | 0  | 0  | 0 | 0 | 1  | 0  | 0         | 0                | 1       |
| AT5G50820 | 0  | 0  | 0  | 0 | 0 | -1 | 0  | 0         | 0                | -1      |
| AT5G50900 | 0  | 0  | 1  | 0 | 0 | 0  | 0  | 0         | 0                | 1       |
| AT5G51010 | 0  | 0  | 0  | 0 | 0 | 0  | -1 | 0         | 0                | -1      |
| AT5G51060 | 0  | 0  | 0  | 0 | 0 | 0  | 1  | 0         | 0                | 1       |
| AT5G51100 | 0  | 0  | 0  | 0 | 0 | -1 | -1 | 0         | 0                | -1      |
| AT5G51110 | 0  | 0  | 0  | 0 | 0 | 0  | -1 | 0         | 0                | -1      |
| AT5G51140 | 0  | 0  | 0  | 0 | 0 | 0  | -1 | 0         | 0                | -1      |
| AT5G51190 | 1  | 1  | 0  | 0 | 0 | 1  | 1  | 0         | 0                | 1       |

Appendix Table S1

| Name      | 1  | 2  | 3  | 4 | 5 | 6  | 7  | bes1D_Col | bes1Dpif45_pif45 | ALL_BES |
|-----------|----|----|----|---|---|----|----|-----------|------------------|---------|
| AT5G51200 | 0  | 0  | 0  | 0 | 0 | 0  | 1  | 0         | 0                | 1       |
| AT5G51210 | 0  | 0  | 0  | 0 | 0 | 1  | 0  | 0         | 0                | 1       |
| AT5G51300 | 0  | 0  | -1 | 0 | 0 | 0  | 0  | 0         | 0                | -1      |
| AT5G51460 | 0  | 0  | 0  | 0 | 0 | -1 | 0  | 0         | 0                | -1      |
| AT5G51470 | 0  | 0  | 0  | 0 | 0 | -1 | 0  | 0         | 0                | -1      |
| AT5G51500 | 0  | 0  | 0  | 0 | 0 | -1 | 0  | 0         | 0                | -1      |
| AT5G51545 | 0  | 0  | 0  | 0 | 0 | 0  | -1 | 0         | 0                | -1      |
| AT5G51550 | 1  | 1  | 1  | 0 | 0 | 0  | 0  | 0         | 0                | 1       |
| AT5G51580 | 0  | 0  | 0  | 0 | 0 | 1  | 0  | 0         | 0                | 1       |
| AT5G51600 | 0  | 0  | 0  | 0 | 0 | 1  | 0  | 0         | 0                | 1       |
| AT5G51620 | 0  | 0  | 1  | 0 | 0 | 0  | 0  | 0         | 0                | 1       |
| AT5G51640 | 0  | 0  | 0  | 0 | 0 | 0  | 1  | 0         | 0                | 1       |
| AT5G51660 | 0  | 0  | 0  | 0 | 0 | 0  | -1 | 0         | 0                | -1      |
| AT5G51730 | 0  | 0  | 0  | 0 | 0 | -1 | 0  | 0         | 0                | -1      |
| AT5G51820 | 0  | 0  | 0  | 0 | 0 | 0  | -1 | 0         | 0                | -1      |
| AT5G51830 | -1 | -1 | -1 | 0 | 0 | -1 | 0  | 0         | 0                | -1      |
| AT5G51850 | 0  | 0  | 0  | 0 | 0 | 1  | 0  | 0         | 0                | 1       |
| AT5G51910 | 0  | 0  | 0  | 0 | 0 | 0  | -1 | 0         | 0                | -1      |
| AT5G51960 | 0  | 0  | 0  | 0 | 0 | 0  | -1 | 0         | 0                | -1      |
| AT5G51980 | 0  | 0  | 0  | 0 | 0 | -1 | 0  | 0         | 0                | -1      |
| AT5G52060 | 0  | 0  | 0  | 0 | 0 | 0  | 1  | 0         | 0                | 1       |
| AT5G52100 | 0  | 0  | 0  | 0 | 0 | 0  | -1 | 0         | 0                | -1      |
| AT5G52110 | 0  | 0  | 0  | 0 | 0 | 0  | -1 | 0         | 0                | -1      |
| AT5G52120 | 1  | 1  | 0  | 0 | 0 | 1  | 1  | 0         | 0                | 1       |
| AT5G52190 | 0  | 0  | 0  | 0 | 0 | 0  | -1 | 0         | 0                | -1      |
| AT5G52310 | 0  | 0  | 0  | 0 | 0 | 0  | 0  | 0         | -1               | -1      |
| AT5G52320 | 0  | 0  | 0  | 0 | 0 | 1  | 0  | 0         | 1                | 1       |
| AT5G52420 | 0  | 0  | -1 | 0 | 0 | 0  | 0  | 0         | 0                | -1      |
| AT5G52470 | 0  | 0  | 0  | 0 | 0 | 0  | -1 | 0         | 0                | -1      |
| AT5G52560 | 0  | 0  | 0  | 0 | 0 | 0  | 1  | 0         | 0                | 1       |
| AT5G52580 | 0  | 0  | 0  | 0 | 0 | 0  | 1  | 0         | 0                | 1       |
| AT5G52650 | 0  | 0  | 0  | 0 | 0 | 0  | -1 | 0         | 0                | -1      |
| AT5G52670 | 0  | 0  | 0  | 0 | 0 | 1  | 0  | 1         | 0                | 1       |
| AT5G52720 | 0  | 0  | 0  | 0 | 0 | 1  | 0  | 1         | 1                | 1       |
| AT5G52750 | 0  | 0  | 0  | 0 | 0 | 0  | 0  | 1         | 0                | 1       |
| AT5G52760 | 0  | 0  | 0  | 0 | 0 | 0  | 0  | 1         | 0                | 1       |
| AT5G52790 | 0  | 0  | 0  | 0 | 0 | 1  | 0  | 0         | 0                | 1       |
| AT5G52800 | 0  | 0  | 0  | 0 | 0 | 1  | 0  | 0         | 0                | 1       |
| AT5G52810 | 0  | 0  | 0  | 0 | 0 | 1  | 0  | 0         | 0                | 1       |
| AT5G52870 | 0  | 0  | 0  | 0 | 0 | -1 | 0  | 0         | 0                | -1      |
| AT5G52890 | 0  | 0  | 0  | 0 | 0 | 1  | 0  | 0         | 0                | 1       |
| AT5G52900 | 0  | 0  | 1  | 0 | 0 | 1  | 0  | 0         | 0                | 1       |
| AT5G52910 | 0  | 0  | 0  | 0 | 0 | 1  | 0  | 0         | 0                | 1       |
| AT5G52960 | 0  | 0  | 0  | 0 | 0 | 0  | -1 | 0         | 0                | -1      |
| AT5G52970 | 0  | 0  | 0  | 0 | 0 | 0  | -1 | 0         | 0                | -1      |
| AT5G53010 | 0  | 0  | 0  | 0 | 0 | -1 | 0  | 0         | 0                | -1      |
| AT5G53045 | 0  | 0  | 0  | 0 | 0 | -1 | 0  | 0         | 0                | -1      |
| AT5G53080 | 0  | 0  | 0  | 0 | 0 | 0  | -1 | 0         | 0                | -1      |
| AT5G53160 | 0  | 0  | 0  | 0 | 0 | 0  | -1 | 0         | 0                | -1      |
| AT5G53190 | 0  | 0  | 0  | 0 | 0 | 0  | 1  | 0         | 0                | 1       |
| AT5G53250 | 0  | 1  | 0  | 0 | 0 | 1  | 1  | 0         | 0                | 1       |
| AT5G53280 | 0  | 0  | 0  | 0 | 0 | 0  | 1  | 0         | 0                | 1       |
| AT5G53350 | 0  | 0  | 0  | 0 | 0 | 0  | 1  | 0         | 0                | 1       |
| AT5G53370 | 0  | 0  | 0  | 0 | 0 | 1  | 0  | 0         | 0                | 1       |
| AT5G53450 | -1 | 0  | 0  | 0 | 0 | 0  | 0  | 0         | 0                | -1      |
| AT5G53480 | 0  | 0  | 0  | 0 | 0 | 0  | 1  | 0         | 0                | 1       |
| AT5G53500 | 0  | 0  | 0  | 0 | 0 | 0  | -1 | 0         | 0                | -1      |
| AT5G53590 | 0  | 0  | 0  | 0 | 0 | 0  | 1  | 0         | 0                | 1       |
| AT5G53730 | 0  | 0  | 0  | 0 | 0 | 1  | 0  | 0         | 0                | 1       |
| AT5G53820 | 0  | 0  | 0  | 0 | 0 | 0  | -1 | 0         | 0                | -1      |
| AT5G53870 | 0  | 0  | 0  | 0 | 0 | 0  | 0  | -1        | -1               | -1      |



Appendix Table S1

| Name      | 1  | 2  | 3  | 4 | 5  | 6  | 7  | bes1D_Col | bes1Dpif45_pif45 | ALL_BES |
|-----------|----|----|----|---|----|----|----|-----------|------------------|---------|
| AT5G53890 | 0  | -1 | 0  | 0 | 0  | 0  | -1 | 0         | 0                | -1      |
| AT5G53900 | 0  | 0  | 0  | 0 | 0  | 0  | -1 | 0         | 0                | -1      |
| AT5G53940 | 0  | 0  | 0  | 0 | 0  | 0  | -1 | 0         | 0                | -1      |
| AT5G53950 | 0  | 0  | 0  | 0 | 0  | -1 | 0  | 0         | 0                | -1      |
| AT5G53970 | 0  | 0  | 0  | 0 | 0  | -1 | 0  | 0         | 0                | -1      |
| AT5G53980 | -1 | -1 | 0  | 0 | -1 | 0  | 0  | 0         | 0                | -1      |
| AT5G53990 | 0  | 0  | 0  | 0 | 0  | 1  | 0  | 0         | 1                | 1       |
| AT5G54000 | 0  | 0  | 0  | 0 | 0  | -1 | 0  | 0         | 0                | -1      |
| AT5G54020 | 0  | 0  | 0  | 0 | 0  | -1 | 0  | 0         | 0                | -1      |
| AT5G54030 | 0  | 0  | 0  | 0 | 0  | 1  | 0  | 0         | 0                | 1       |
| AT5G54040 | 0  | 0  | 0  | 0 | 0  | -1 | 0  | 0         | 0                | -1      |
| AT5G54050 | 0  | 0  | 0  | 0 | 0  | 1  | 0  | 0         | 0                | 1       |
| AT5G54080 | 0  | 0  | 0  | 0 | 0  | 0  | 0  | 1         | 0                | 1       |
| AT5G54160 | 0  | 0  | 0  | 0 | 0  | 0  | 1  | 0         | 0                | 1       |
| AT5G54180 | 0  | 0  | 0  | 0 | 0  | 0  | -1 | 0         | 0                | -1      |
| AT5G54206 | 0  | 0  | 0  | 0 | 0  | 1  | 0  | 0         | 0                | 1       |
| AT5G54240 | 0  | 0  | 0  | 0 | 0  | 0  | 0  | 1         | 0                | 1       |
| AT5G54270 | 0  | 0  | 0  | 0 | 0  | 0  | -1 | 0         | 0                | -1      |
| AT5G54280 | 0  | 0  | 0  | 0 | 0  | 0  | -1 | 0         | 0                | -1      |
| AT5G54290 | 0  | 0  | 0  | 0 | 0  | 0  | -1 | 0         | 0                | -1      |
| AT5G54370 | 0  | 0  | 0  | 0 | 0  | -1 | 0  | 0         | 0                | -1      |
| AT5G54380 | 1  | 1  | 0  | 0 | 0  | 0  | 1  | 0         | 0                | 1       |
| AT5G54390 | -1 | -1 | -1 | 0 | 0  | 0  | 0  | 0         | 0                | -1      |
| AT5G54490 | 0  | 0  | 0  | 0 | 0  | 1  | 0  | 0         | 0                | 1       |
| AT5G54500 | 0  | 0  | 0  | 0 | 0  | 0  | 1  | 0         | 0                | 1       |
| AT5G54510 | -1 | -1 | 0  | 0 | 0  | 0  | -1 | 0         | 0                | -1      |
| AT5G54600 | 0  | 0  | 0  | 0 | 0  | 0  | -1 | 0         | 0                | -1      |
| AT5G54640 | 0  | 0  | 1  | 0 | 0  | 0  | 0  | 0         | 0                | 1       |
| AT5G54700 | 0  | 0  | 0  | 0 | 0  | 0  | 0  | 1         | 1                | 1       |
| AT5G54710 | 0  | 0  | 0  | 0 | 0  | 0  | 0  | 1         | 1                | 1       |
| AT5G54740 | 0  | 0  | 0  | 0 | 0  | -1 | 0  | 0         | 0                | -1      |
| AT5G54770 | 0  | 0  | 0  | 0 | 0  | 0  | -1 | 0         | 0                | -1      |
| AT5G54860 | 0  | 0  | 0  | 0 | 0  | 0  | 1  | 0         | 0                | 1       |
| AT5G54870 | 0  | 0  | 0  | 0 | 0  | 1  | 1  | 0         | 0                | 1       |
| AT5G54980 | 0  | 0  | 0  | 0 | 0  | 0  | -1 | 0         | 0                | -1      |
| AT5G55120 | -1 | 0  | 0  | 0 | 0  | 0  | 0  | 0         | 0                | -1      |
| AT5G55125 | 0  | 0  | 0  | 0 | 0  | -1 | 0  | 0         | 0                | -1      |
| AT5G55180 | 0  | 0  | 0  | 0 | 0  | 1  | 0  | 0         | 0                | 1       |
| AT5G55210 | 0  | 0  | -1 | 0 | 0  | 0  | 0  | 0         | 0                | -1      |
| AT5G55250 | 0  | 0  | 0  | 0 | 0  | -1 | 0  | 0         | 0                | -1      |
| AT5G55360 | 0  | 0  | 0  | 0 | 0  | 1  | 0  | 0         | 0                | 1       |
| AT5G55380 | 0  | 0  | 0  | 0 | 0  | 0  | 1  | 0         | 0                | 1       |
| AT5G55390 | 0  | -1 | 0  | 0 | 0  | 0  | 0  | 0         | 0                | -1      |
| AT5G55480 | 0  | 0  | 0  | 0 | 0  | 0  | 1  | 0         | 0                | 1       |
| AT5G55490 | 0  | 0  | 0  | 0 | 0  | -1 | 0  | 0         | 0                | -1      |
| AT5G55620 | 0  | 0  | 0  | 0 | 0  | 0  | -1 | 0         | 0                | -1      |
| AT5G55700 | 0  | 0  | 0  | 0 | 0  | 0  | -1 | 0         | 0                | -1      |
| AT5G55710 | 0  | 0  | 0  | 0 | 0  | 0  | -1 | 0         | 0                | -1      |
| AT5G55770 | 0  | 0  | 0  | 0 | 0  | 1  | 0  | 0         | 0                | 1       |
| AT5G55780 | 0  | 0  | 0  | 0 | 0  | 1  | 0  | 0         | 0                | 1       |
| AT5G55790 | 0  | 0  | 0  | 0 | 0  | 0  | -1 | 0         | 0                | -1      |
| AT5G55800 | 0  | 0  | 0  | 0 | 0  | 1  | 0  | 0         | 0                | 1       |
| AT5G55830 | 0  | 0  | 0  | 0 | 0  | 1  | 1  | 0         | 0                | 1       |
| AT5G55860 | 0  | 0  | 0  | 0 | 0  | 0  | 1  | 0         | 0                | 1       |
| AT5G55896 | 0  | 0  | 0  | 0 | 0  | -1 | 0  | 0         | 0                | -1      |
| AT5G55960 | 0  | 1  | 0  | 0 | 0  | 1  | 1  | 0         | 0                | 1       |
| AT5G55970 | 0  | 0  | 0  | 0 | 0  | 0  | 1  | 0         | 0                | 1       |
| AT5G56000 | 0  | 0  | 0  | 0 | 0  | 0  | 1  | 0         | 0                | 1       |
| AT5G56010 | 0  | 0  | 0  | 0 | 0  | 0  | 1  | 0         | 0                | 1       |
| AT5G56170 | 1  | 1  | 1  | 0 | 0  | 0  | 0  | 0         | 0                | 1       |
| AT5G56320 | 0  | 0  | 0  | 0 | 0  | 0  | 1  | 0         | 0                | 1       |

Appendix Table S1

| Name      | 1  | 2  | 3  | 4 | 5 | 6  | 7  | bes1D_Col | bes1Dpif45_pif45 | ALL_BES |
|-----------|----|----|----|---|---|----|----|-----------|------------------|---------|
| AT5G56350 | 0  | 0  | 0  | 0 | 0 | 0  | 1  | 0         | 0                | 1       |
| AT5G56370 | 0  | 0  | 0  | 0 | 0 | -1 | 0  | 0         | 0                | -1      |
| AT5G56380 | 0  | 0  | 0  | 0 | 0 | -1 | 0  | 0         | 0                | -1      |
| AT5G56540 | 0  | 0  | 0  | 0 | 0 | 0  | 1  | 0         | 0                | 1       |
| AT5G56580 | 0  | 0  | 0  | 0 | 0 | 1  | 0  | 0         | 0                | 1       |
| AT5G56650 | 0  | 0  | 0  | 0 | 0 | 0  | -1 | 0         | 0                | -1      |
| AT5G56660 | 0  | 0  | 0  | 0 | 0 | 0  | -1 | 0         | 0                | -1      |
| AT5G56747 | 0  | 0  | 0  | 0 | 0 | -1 | 0  | 0         | 0                | -1      |
| AT5G56750 | 1  | 0  | 0  | 0 | 0 | 0  | 0  | 0         | 0                | 1       |
| AT5G56810 | 0  | 0  | 0  | 0 | 0 | -1 | 0  | 0         | 0                | -1      |
| AT5G56850 | 0  | 0  | 0  | 0 | 0 | 0  | 0  | -1        | 0                | -1      |
| AT5G56860 | 0  | 0  | 0  | 0 | 0 | 0  | 1  | 0         | 0                | 1       |
| AT5G56870 | 0  | 0  | 0  | 0 | 0 | 0  | 1  | 0         | 0                | 1       |
| AT5G56910 | 0  | 0  | 0  | 0 | 0 | -1 | 0  | 0         | 0                | -1      |
| AT5G56960 | 0  | 0  | 0  | 0 | 0 | 0  | 0  | 1         | 0                | 1       |
| AT5G56970 | 0  | 0  | 0  | 0 | 0 | -1 | 0  | 0         | 0                | -1      |
| AT5G56980 | -1 | -1 | 0  | 0 | 0 | 0  | 0  | 0         | 0                | -1      |
| AT5G57000 | 0  | 0  | 0  | 0 | 0 | 0  | -1 | 0         | 0                | -1      |
| AT5G57020 | 0  | 0  | 0  | 0 | 0 | 0  | -1 | 0         | 0                | -1      |
| AT5G57040 | 0  | 0  | 0  | 0 | 0 | 0  | 1  | 0         | 0                | 1       |
| AT5G57080 | 0  | 0  | 0  | 0 | 0 | 0  | 1  | 0         | 0                | 1       |
| AT5G57090 | 0  | 0  | 0  | 0 | 0 | 0  | 1  | 0         | 0                | 1       |
| AT5G57150 | 0  | 0  | 0  | 0 | 0 | 0  | -1 | 0         | 0                | -1      |
| AT5G57170 | 0  | 0  | 0  | 0 | 0 | 0  | -1 | 0         | 0                | -1      |
| AT5G57220 | 0  | 0  | 0  | 0 | 0 | 1  | 0  | 1         | 0                | 1       |
| AT5G57230 | 0  | 0  | 0  | 0 | 0 | 0  | -1 | 0         | 0                | -1      |
| AT5G57300 | 0  | 0  | 0  | 0 | 0 | 0  | -1 | 0         | 0                | -1      |
| AT5G57345 | 0  | 0  | 0  | 0 | 0 | 0  | -1 | 0         | 0                | -1      |
| AT5G57370 | 0  | 0  | 0  | 0 | 0 | 0  | -1 | 0         | 0                | -1      |
| AT5G57440 | 0  | 0  | 0  | 0 | 0 | 0  | 1  | 0         | 0                | 1       |
| AT5G57480 | 0  | 0  | 0  | 0 | 0 | 0  | 1  | 0         | 0                | 1       |
| AT5G57510 | 0  | 0  | 0  | 0 | 0 | 1  | 0  | 1         | 1                | 1       |
| AT5G57530 | 0  | 0  | 0  | 0 | 0 | -1 | 0  | 0         | 0                | -1      |
| AT5G57550 | 0  | 0  | 0  | 1 | 0 | 1  | 0  | 0         | 0                | 1       |
| AT5G57560 | 1  | 1  | 1  | 1 | 1 | 0  | 0  | 0         | 0                | 1       |
| AT5G57590 | 0  | 0  | -1 | 0 | 0 | 0  | 0  | 0         | 0                | -1      |
| AT5G57610 | 0  | 0  | 0  | 0 | 0 | 0  | 1  | 0         | 0                | 1       |
| AT5G57620 | 0  | 0  | 0  | 0 | 0 | 0  | -1 | 0         | 0                | -1      |
| AT5G57625 | 0  | 0  | 0  | 0 | 0 | -1 | 0  | -1        | -1               | -1      |
| AT5G57740 | 0  | 0  | 0  | 0 | 0 | 0  | -1 | 0         | 0                | -1      |
| AT5G57780 | -1 | -1 | -1 | 0 | 0 | 0  | -1 | 0         | 0                | -1      |
| AT5G57790 | 0  | 0  | 0  | 0 | 0 | -1 | 0  | 0         | -1               | -1      |
| AT5G57920 | 0  | 0  | 1  | 0 | 0 | 0  | 0  | 0         | 0                | 1       |
| AT5G57930 | 0  | 0  | 0  | 0 | 0 | 0  | -1 | 0         | 0                | -1      |
| AT5G57940 | 0  | 0  | 0  | 0 | 0 | 0  | -1 | 0         | 0                | -1      |
| AT5G58010 | 0  | 0  | 0  | 0 | 0 | -1 | 0  | 0         | 0                | -1      |
| AT5G58120 | 0  | 0  | 0  | 0 | 0 | 1  | 0  | 0         | 0                | 1       |
| AT5G58210 | 0  | 0  | 0  | 0 | 0 | 0  | -1 | 0         | 0                | -1      |
| AT5G58220 | 0  | 0  | 0  | 0 | 0 | 0  | -1 | 0         | 0                | -1      |
| AT5G58240 | 0  | 0  | 0  | 0 | 0 | 0  | -1 | 0         | 0                | -1      |
| AT5G58250 | 0  | 0  | 0  | 0 | 0 | 0  | -1 | 0         | 0                | -1      |
| AT5G58260 | 0  | 0  | -1 | 0 | 0 | 0  | -1 | 0         | 0                | -1      |
| AT5G58320 | 0  | 0  | 0  | 0 | 0 | 1  | 0  | 0         | 0                | 1       |
| AT5G58330 | 0  | 0  | 0  | 0 | 0 | 0  | 1  | 0         | 0                | 1       |
| AT5G58350 | 0  | 0  | 0  | 0 | 0 | 1  | 0  | 0         | 0                | 1       |
| AT5G58360 | 0  | 0  | 0  | 0 | 0 | 1  | 0  | 0         | 0                | 1       |
| AT5G58410 | 0  | 0  | -1 | 0 | 0 | 0  | 0  | 0         | 0                | -1      |
| AT5G58440 | 0  | 0  | 0  | 0 | 0 | 0  | -1 | 0         | 0                | -1      |
| AT5G58480 | 0  | 0  | 0  | 0 | 0 | 0  | -1 | 0         | 0                | -1      |
| AT5G58490 | 0  | 0  | 0  | 0 | 0 | 0  | 1  | 0         | 0                | 1       |
| AT5G58520 | 0  | 0  | 0  | 0 | 0 | 0  | -1 | 0         | 0                | -1      |

Appendix Table S1

| Name      | 1  | 2  | 3  | 4 | 5 | 6  | 7  | bes1D_Col | bes1Dpif45_pif45 | ALL_BES |
|-----------|----|----|----|---|---|----|----|-----------|------------------|---------|
| AT5G58560 | 0  | 0  | 0  | 0 | 0 | 0  | -1 | 0         | 0                | -1      |
| AT5G58570 | 0  | 0  | 0  | 0 | 0 | 0  | -1 | 0         | 0                | -1      |
| AT5G58600 | 0  | 0  | 0  | 0 | 0 | -1 | -1 | 0         | 0                | -1      |
| AT5G58620 | 0  | 0  | 1  | 0 | 0 | 0  | 0  | 0         | 0                | 1       |
| AT5G58650 | 0  | 0  | -1 | 0 | 0 | 0  | 0  | 0         | 0                | -1      |
| AT5G58670 | 0  | 0  | 0  | 1 | 0 | 0  | 0  | 0         | 0                | 1       |
| AT5G58750 | 0  | 0  | 0  | 0 | 0 | 1  | 0  | 0         | 1                | 1       |
| AT5G58780 | 0  | 0  | 0  | 0 | 0 | -1 | 0  | 0         | 0                | -1      |
| AT5G58784 | 0  | 0  | 0  | 0 | 0 | -1 | 0  | 0         | 0                | -1      |
| AT5G58820 | 0  | 0  | 0  | 0 | 0 | 1  | 0  | 0         | 0                | 1       |
| AT5G58840 | 0  | 0  | 0  | 0 | 0 | 1  | 0  | 0         | 0                | 1       |
| AT5G58860 | 0  | 0  | 0  | 0 | 0 | 0  | 0  | 0         | 1                | 1       |
| AT5G58960 | 0  | 0  | 0  | 0 | 0 | 0  | 1  | 0         | 0                | 1       |
| AT5G59000 | 1  | 0  | 0  | 0 | 0 | 0  | 0  | 0         | 0                | 1       |
| AT5G59010 | 0  | 0  | 0  | 0 | 0 | 0  | 1  | 0         | 0                | 1       |
| AT5G59050 | 0  | 0  | 0  | 0 | 0 | 1  | 1  | 0         | 0                | 1       |
| AT5G59090 | 0  | 0  | 0  | 0 | 0 | 0  | -1 | 0         | 0                | -1      |
| AT5G59100 | 0  | 0  | 0  | 0 | 0 | 1  | 0  | 0         | 0                | 1       |
| AT5G59120 | 0  | 0  | 0  | 0 | 0 | 1  | 0  | 0         | 0                | 1       |
| AT5G59180 | 0  | 0  | 0  | 0 | 0 | 1  | 0  | 0         | 0                | 1       |
| AT5G59220 | 0  | 0  | 0  | 0 | 0 | 1  | 0  | 0         | 0                | 1       |
| AT5G59250 | 0  | 0  | 0  | 0 | 0 | 0  | 1  | 0         | 0                | 1       |
| AT5G59380 | 0  | 0  | 0  | 0 | 0 | 0  | -1 | 0         | 0                | -1      |
| AT5G59400 | -1 | 0  | 0  | 0 | 0 | 0  | 0  | 0         | 0                | -1      |
| AT5G59430 | 0  | 0  | -1 | 0 | 0 | 0  | 0  | 0         | 0                | -1      |
| AT5G59440 | 0  | 0  | 0  | 0 | 0 | 0  | -1 | 0         | 0                | -1      |
| AT5G59480 | 0  | 0  | -1 | 0 | 0 | 0  | 0  | 0         | 0                | -1      |
| AT5G59500 | 0  | 0  | 0  | 0 | 0 | 0  | 1  | 0         | 0                | 1       |
| AT5G59570 | 0  | 0  | 0  | 0 | 0 | 0  | -1 | 0         | 0                | -1      |
| AT5G59650 | 0  | 0  | 0  | 0 | 0 | 1  | 0  | 0         | 0                | 1       |
| AT5G59670 | 0  | 0  | 0  | 0 | 0 | 1  | 0  | 0         | 0                | 1       |
| AT5G59680 | 0  | 0  | 0  | 0 | 0 | 1  | 0  | 0         | 0                | 1       |
| AT5G59720 | 0  | 0  | 0  | 0 | 0 | 0  | 0  | 0         | 1                | 1       |
| AT5G59750 | 0  | 0  | 0  | 0 | 0 | 0  | 1  | 0         | 0                | 1       |
| AT5G59820 | 0  | 0  | 0  | 0 | 0 | 1  | 0  | 0         | 0                | 1       |
| AT5G59870 | 0  | 0  | 0  | 0 | 0 | 0  | 1  | 0         | 0                | 1       |
| AT5G59910 | 0  | 0  | 0  | 0 | 0 | 0  | 1  | 0         | 0                | 1       |
| AT5G59920 | 0  | 0  | 0  | 0 | 0 | 0  | -1 | 0         | 0                | -1      |
| AT5G59990 | 0  | 0  | 0  | 0 | 0 | -1 | 0  | 0         | 0                | -1      |
| AT5G60100 | 0  | 0  | 0  | 0 | 0 | 1  | 0  | 0         | 0                | 1       |
| AT5G60230 | 0  | 0  | 0  | 0 | 0 | 0  | 1  | 0         | 0                | 1       |
| AT5G60260 | 0  | 0  | 0  | 0 | 0 | -1 | 0  | 0         | 0                | -1      |
| AT5G60270 | 1  | 0  | 0  | 0 | 0 | 0  | 0  | 0         | 0                | 1       |
| AT5G60300 | 0  | 0  | 0  | 0 | 0 | 0  | 1  | 0         | 0                | 1       |
| AT5G60340 | 0  | 0  | 0  | 0 | 0 | -1 | 0  | 0         | 0                | -1      |
| AT5G60440 | 0  | 0  | 0  | 0 | 0 | -1 | 0  | 0         | 0                | -1      |
| AT5G60460 | 0  | 0  | 0  | 0 | 0 | -1 | 0  | 0         | 0                | -1      |
| AT5G60480 | 0  | 0  | 0  | 0 | 0 | 1  | 0  | 0         | 0                | 1       |
| AT5G60490 | 0  | 0  | 0  | 0 | 0 | 1  | 0  | 0         | 0                | 1       |
| AT5G60520 | 0  | 0  | 0  | 0 | 0 | -1 | 0  | 0         | 0                | -1      |
| AT5G60530 | 0  | 0  | 0  | 0 | 0 | -1 | 0  | 0         | 0                | -1      |
| AT5G60670 | 0  | 0  | 0  | 0 | 0 | 0  | -1 | 0         | 0                | -1      |
| AT5G60850 | -1 | -1 | 0  | 0 | 0 | 0  | -1 | 0         | 0                | -1      |
| AT5G60860 | 0  | 0  | 0  | 0 | 0 | 0  | 1  | 0         | 0                | 1       |
| AT5G60900 | 0  | 0  | 0  | 0 | 0 | 0  | 0  | 0         | 1                | 1       |
| AT5G60920 | 0  | 1  | 0  | 0 | 0 | 0  | 0  | 0         | 0                | 1       |
| AT5G60930 | 0  | 0  | 0  | 0 | 0 | 1  | 0  | 0         | 0                | 1       |
| AT5G60950 | 0  | -1 | 0  | 0 | 0 | -1 | 0  | 0         | 0                | -1      |
| AT5G61010 | 0  | 0  | 0  | 0 | 0 | 1  | 0  | 0         | 0                | 1       |
| AT5G61200 | 0  | 0  | 0  | 0 | 0 | 1  | 0  | 0         | 0                | 1       |
| AT5G61210 | 0  | 0  | 0  | 0 | 0 | 0  | 1  | 0         | 0                | 1       |

Appendix Table S1

| Name      | 1  | 2  | 3  | 4 | 5 | 6  | 7  | bes1D_Col | bes1Dpif45_pif45 | ALL_BES |
|-----------|----|----|----|---|---|----|----|-----------|------------------|---------|
| AT5G61410 | 0  | 0  | 0  | 0 | 0 | 0  | -1 | 0         | 0                | -1      |
| AT5G61420 | 0  | 0  | 0  | 0 | 0 | 0  | -1 | 0         | 0                | -1      |
| AT5G61440 | 1  | 1  | 0  | 0 | 0 | 0  | 0  | 0         | 0                | 1       |
| AT5G61450 | 0  | 0  | 1  | 0 | 0 | 0  | 0  | 0         | 0                | 1       |
| AT5G61520 | 1  | 1  | 0  | 0 | 0 | 0  | 1  | 0         | 0                | 1       |
| AT5G61570 | 1  | 1  | 0  | 0 | 0 | 0  | 1  | 0         | 0                | 1       |
| AT5G61650 | 0  | 0  | 0  | 0 | 0 | 1  | 0  | 0         | 0                | 1       |
| AT5G61660 | 0  | 0  | 0  | 0 | 0 | 1  | 1  | 0         | 0                | 1       |
| AT5G61900 | 0  | 0  | 0  | 0 | 0 | 0  | -1 | 0         | 0                | -1      |
| AT5G62090 | 0  | 0  | 1  | 0 | 0 | 0  | 0  | 0         | 0                | 1       |
| AT5G62220 | 1  | 1  | 1  | 0 | 0 | 0  | 0  | 0         | 0                | 1       |
| AT5G62290 | 0  | 0  | 0  | 0 | 0 | 0  | -1 | 0         | 0                | -1      |
| AT5G62340 | 0  | 0  | 0  | 0 | 0 | 0  | -1 | 0         | 0                | -1      |
| AT5G62430 | -1 | -1 | 0  | 0 | 0 | 0  | 0  | 0         | 0                | -1      |
| AT5G62480 | 0  | 0  | 0  | 0 | 0 | 1  | 0  | 0         | 0                | 1       |
| AT5G62490 | 0  | 0  | 0  | 0 | 0 | -1 | 0  | 0         | 0                | -1      |
| AT5G62550 | 0  | 0  | 0  | 0 | 0 | 1  | 0  | 0         | 0                | 1       |
| AT5G62575 | 0  | 0  | 0  | 0 | 0 | 0  | -1 | 0         | 0                | -1      |
| AT5G62730 | 1  | 0  | 0  | 0 | 0 | 0  | 0  | 0         | 0                | 1       |
| AT5G62770 | 0  | 0  | 0  | 0 | 0 | 1  | 0  | 0         | 0                | 1       |
| AT5G62900 | -1 | -1 | 0  | 0 | 0 | 0  | 0  | 0         | 0                | -1      |
| AT5G62910 | 0  | 0  | 0  | 0 | 0 | 0  | 1  | 0         | 0                | 1       |
| AT5G62920 | -1 | -1 | 0  | 0 | 0 | 0  | -1 | 0         | -1               | -1      |
| AT5G62980 | 0  | 0  | 0  | 0 | 0 | 0  | 1  | 0         | 0                | 1       |
| AT5G63110 | 0  | 0  | 0  | 0 | 0 | 0  | -1 | 0         | 0                | -1      |
| AT5G63200 | 0  | 0  | 0  | 0 | 0 | 0  | -1 | 0         | 0                | -1      |
| AT5G63250 | 0  | 0  | 0  | 0 | 0 | 0  | 0  | 1         | 1                | 1       |
| AT5G63310 | 0  | 0  | 0  | 0 | 0 | 0  | -1 | 0         | 0                | -1      |
| AT5G63350 | 0  | 0  | 0  | 0 | 0 | 1  | 0  | 0         | 0                | 1       |
| AT5G63400 | 0  | 0  | 0  | 0 | 0 | 0  | 1  | 0         | 0                | 1       |
| AT5G63410 | 1  | 1  | 0  | 0 | 0 | 0  | 0  | 0         | 0                | 1       |
| AT5G63470 | 0  | 0  | 1  | 0 | 0 | 0  | 0  | 0         | 0                | 1       |
| AT5G63570 | 0  | 0  | 0  | 0 | 0 | 0  | 1  | 0         | 0                | 1       |
| AT5G63590 | 0  | 0  | 0  | 0 | 0 | 0  | 1  | 0         | 0                | 1       |
| AT5G63600 | 0  | 0  | 0  | 0 | 0 | 0  | -1 | 0         | 0                | -1      |
| AT5G63630 | 0  | 0  | 0  | 0 | 0 | 0  | 1  | 0         | 0                | 1       |
| AT5G63650 | 0  | 0  | 0  | 0 | 0 | 0  | 1  | 0         | 0                | 1       |
| AT5G63660 | 0  | -1 | 0  | 0 | 0 | 0  | 0  | 0         | 0                | -1      |
| AT5G63770 | 0  | 0  | 0  | 0 | 0 | 0  | 1  | 0         | 0                | 1       |
| AT5G63790 | -1 | -1 | -1 | 0 | 0 | 0  | 0  | 0         | 0                | -1      |
| AT5G63800 | 0  | 0  | 0  | 0 | 0 | 1  | 1  | 0         | 0                | 1       |
| AT5G63810 | 1  | 0  | 0  | 0 | 0 | 0  | 1  | 0         | 0                | 1       |
| AT5G63820 | 0  | 0  | 0  | 0 | 0 | 1  | 0  | 0         | 1                | 1       |
| AT5G63850 | 0  | 0  | 0  | 0 | 0 | 0  | 0  | 0         | 1                | 1       |
| AT5G63910 | 0  | 0  | -1 | 0 | 0 | 0  | 0  | 0         | 0                | -1      |
| AT5G63970 | 0  | 0  | 0  | 0 | 0 | 0  | -1 | 0         | 0                | -1      |
| AT5G64040 | 0  | 0  | 0  | 0 | 0 | 0  | 1  | 0         | 0                | 1       |
| AT5G64070 | 0  | 0  | 0  | 0 | 0 | 0  | -1 | 0         | 0                | -1      |
| AT5G64100 | 0  | 0  | 0  | 1 | 0 | 0  | 0  | 0         | 0                | 1       |
| AT5G64110 | 0  | 0  | 0  | 0 | 0 | 0  | -1 | 0         | 0                | -1      |
| AT5G64120 | 0  | 0  | 0  | 0 | 0 | -1 | 0  | 0         | 0                | -1      |
| AT5G64150 | 0  | 0  | 0  | 0 | 0 | 0  | -1 | 0         | 0                | -1      |
| AT5G64190 | 0  | 0  | 0  | 0 | 0 | 1  | 0  | 0         | 0                | 1       |
| AT5G64240 | 0  | 0  | 0  | 0 | 0 | 0  | -1 | 0         | 0                | -1      |
| AT5G64250 | 0  | -1 | 0  | 0 | 0 | 0  | 0  | 0         | 0                | -1      |
| AT5G64260 | -1 | -1 | -1 | 0 | 0 | 0  | 0  | 0         | 0                | -1      |
| AT5G64280 | 0  | 0  | 0  | 0 | 0 | 0  | 1  | 0         | 0                | 1       |
| AT5G64370 | 0  | 0  | 0  | 0 | 0 | 0  | -1 | 0         | 0                | -1      |
| AT5G64380 | 0  | 0  | 0  | 0 | 0 | 0  | 1  | 0         | 0                | 1       |
| AT5G64440 | 0  | 0  | -1 | 0 | 0 | 0  | 0  | 0         | 0                | -1      |
| AT5G64570 | 0  | 0  | 0  | 0 | 0 | 0  | -1 | 0         | 0                | -1      |

Appendix Table S1

| Name      | 1  | 2  | 3  | 4 | 5 | 6  | 7  | bes1D_Col | bes1Dpif45_pif45 | ALL_BES |
|-----------|----|----|----|---|---|----|----|-----------|------------------|---------|
| AT5G64740 | 1  | 1  | 0  | 0 | 0 | 0  | 0  | 0         | 0                | 1       |
| AT5G64750 | 0  | 0  | 0  | 0 | 0 | 0  | 0  | 0         | 1                | 1       |
| AT5G64770 | 1  | 1  | 1  | 0 | 1 | 0  | 0  | 1         | 1                | 1       |
| AT5G64780 | 1  | 1  | 1  | 0 | 0 | 0  | 0  | 0         | 1                | 1       |
| AT5G64810 | 0  | 0  | 0  | 0 | 0 | 0  | 0  | 1         | 1                | 1       |
| AT5G64816 | 0  | 0  | 0  | 0 | 0 | 0  | -1 | 0         | 0                | -1      |
| AT5G64860 | 0  | 0  | 0  | 0 | 0 | 0  | 1  | 0         | 0                | 1       |
| AT5G64890 | 0  | 0  | 0  | 0 | 0 | 0  | 0  | 1         | 0                | 1       |
| AT5G64905 | 0  | 0  | 0  | 0 | 0 | 0  | 0  | 1         | 0                | 1       |
| AT5G65110 | 0  | 0  | 0  | 0 | 0 | 0  | 1  | 0         | 0                | 1       |
| AT5G65140 | 0  | 0  | 0  | 0 | 0 | 1  | 1  | 0         | 0                | 1       |
| AT5G65210 | 0  | 0  | 0  | 0 | 0 | 0  | -1 | 0         | 0                | -1      |
| AT5G65220 | 0  | 0  | 0  | 0 | 0 | 0  | 1  | 0         | 0                | 1       |
| AT5G65280 | 0  | 0  | 0  | 0 | 0 | -1 | 0  | 0         | 0                | -1      |
| AT5G65300 | 0  | -1 | -1 | 0 | 0 | 0  | 0  | 0         | 0                | -1      |
| AT5G65360 | 0  | 0  | 0  | 0 | 0 | 0  | 1  | 0         | 0                | 1       |
| AT5G65410 | 0  | 0  | 0  | 0 | 0 | 0  | 1  | 0         | 0                | 1       |
| AT5G65470 | 0  | 0  | 0  | 0 | 0 | 0  | 1  | 0         | 0                | 1       |
| AT5G65480 | 0  | 0  | 0  | 0 | 0 | 0  | 1  | 0         | 0                | 1       |
| AT5G65600 | 0  | 0  | 0  | 0 | 0 | 1  | 0  | 1         | 1                | 1       |
| AT5G65610 | 1  | 1  | 0  | 0 | 0 | 0  | 0  | 0         | 0                | 1       |
| AT5G65630 | 0  | 0  | 0  | 0 | 0 | 0  | 1  | 0         | 0                | 1       |
| AT5G65640 | 0  | 0  | 0  | 0 | 0 | 0  | 1  | 0         | 0                | 1       |
| AT5G65650 | 0  | 0  | -1 | 0 | 0 | 0  | 0  | 0         | 0                | -1      |
| AT5G65670 | 0  | 0  | 0  | 0 | 0 | 0  | 1  | 0         | 0                | 1       |
| AT5G65690 | 0  | 0  | 0  | 0 | 0 | 0  | 0  | 0         | 1                | 1       |
| AT5G65730 | 0  | 0  | 0  | 0 | 0 | -1 | 0  | -1        | -1               | -1      |
| AT5G65790 | 0  | 0  | 0  | 0 | 0 | 1  | 0  | 0         | 0                | 1       |
| AT5G65800 | 0  | 1  | 0  | 0 | 0 | 1  | 1  | 1         | 1                | 1       |
| AT5G65870 | 0  | 0  | -1 | 0 | 0 | 0  | 0  | 0         | 0                | -1      |
| AT5G65925 | 0  | 0  | 0  | 0 | 0 | 1  | 0  | 0         | 0                | 1       |
| AT5G65950 | 0  | 0  | 0  | 0 | 0 | 0  | -1 | 0         | 0                | -1      |
| AT5G65980 | 0  | 0  | 0  | 0 | 0 | 1  | 0  | 0         | 0                | 1       |
| AT5G66080 | -1 | -1 | 0  | 0 | 0 | 0  | -1 | 0         | 0                | -1      |
| AT5G66090 | 0  | 0  | 0  | 0 | 0 | 0  | -1 | 0         | 0                | -1      |
| AT5G66110 | 0  | 0  | 0  | 0 | 0 | 0  | -1 | 0         | 0                | -1      |
| AT5G66170 | 0  | 0  | 0  | 0 | 0 | 0  | 0  | 0         | -1               | -1      |
| AT5G66190 | 0  | 0  | 0  | 0 | 0 | 0  | 1  | 0         | 0                | 1       |
| AT5G66210 | 0  | 0  | 0  | 0 | 0 | 0  | 1  | 0         | 0                | 1       |
| AT5G66230 | 0  | 0  | 0  | 0 | 0 | 1  | 1  | 0         | 0                | 1       |
| AT5G66260 | 0  | 0  | 0  | 0 | 0 | 1  | 0  | 0         | 0                | 1       |
| AT5G66280 | 0  | 0  | 0  | 0 | 0 | 0  | 1  | 0         | 0                | 1       |
| AT5G66330 | 0  | -1 | 0  | 0 | 0 | 0  | 0  | 0         | 0                | -1      |
| AT5G66400 | 0  | 0  | 0  | 0 | 0 | -1 | 0  | -1        | 0                | -1      |
| AT5G66420 | 0  | -1 | 0  | 0 | 0 | 0  | 0  | 0         | 0                | -1      |
| AT5G66520 | 0  | 0  | -1 | 0 | 0 | 0  | 0  | 0         | 0                | -1      |
| AT5G66530 | 0  | 0  | 0  | 0 | 0 | 0  | -1 | 0         | 0                | -1      |
| AT5G66550 | 0  | 0  | 0  | 0 | 0 | 0  | -1 | 0         | 0                | -1      |
| AT5G66570 | 0  | 0  | 0  | 0 | 0 | 0  | 1  | 0         | 0                | 1       |
| AT5G66700 | 0  | 0  | 0  | 0 | 0 | 0  | 1  | 0         | 0                | 1       |
| AT5G66750 | 0  | 0  | 0  | 0 | 0 | 0  | 1  | 0         | 0                | 1       |
| AT5G66760 | 0  | 0  | 0  | 0 | 0 | 0  | 1  | 0         | 0                | 1       |
| AT5G66850 | 0  | 0  | -1 | 0 | 0 | 0  | 0  | 0         | 0                | -1      |
| AT5G66890 | 0  | 0  | 0  | 0 | 0 | 0  | 0  | 0         | 1                | 1       |
| AT5G66920 | 1  | 1  | 0  | 0 | 0 | 0  | 1  | 0         | 0                | 1       |
| AT5G66950 | 0  | 0  | 0  | 0 | 0 | 0  | -1 | 0         | 0                | -1      |
| AT5G66985 | 0  | 0  | -1 | 0 | 0 | -1 | 0  | 0         | 0                | -1      |
| AT5G67020 | 0  | 0  | 0  | 0 | 0 | 1  | 0  | 0         | 0                | 1       |
| AT5G67080 | 1  | 1  | 0  | 0 | 0 | 0  | 0  | 0         | 0                | 1       |
| AT5G67090 | 0  | 0  | 0  | 0 | 0 | 1  | 0  | 0         | 0                | 1       |
| AT5G67260 | 0  | 0  | 0  | 0 | 0 | 0  | 1  | 0         | 0                | 1       |

Appendix Table S1

| <b>Name</b> | <b>1</b> | <b>2</b> | <b>3</b> | <b>4</b> | <b>5</b> | <b>6</b> | <b>7</b> | <b>bes1D_Col</b> | <b>bes1Dpif45_pif45</b> | <b>ALL_BES</b> |
|-------------|----------|----------|----------|----------|----------|----------|----------|------------------|-------------------------|----------------|
| AT5G67270   | 0        | 0        | 0        | 0        | 0        | 1        | 0        | 0                | 0                       | 1              |
| AT5G67340   | 0        | 0        | 0        | 0        | 0        | 1        | 0        | 0                | 1                       | 1              |
| AT5G67370   | 0        | 0        | 0        | 0        | 0        | 1        | 0        | 0                | 0                       | 1              |
| AT5G67390   | 0        | 0        | 0        | 0        | 0        | 0        | -1       | 0                | 0                       | -1             |
| AT5G67400   | 0        | 0        | 0        | 0        | 0        | -1       | 0        | 0                | 0                       | -1             |
| AT5G67420   | 0        | 0        | -1       | 0        | 0        | 0        | -1       | 0                | 0                       | -1             |
| AT5G67480   | 0        | 0        | 0        | 0        | 0        | -1       | 0        | 0                | 0                       | -1             |
| AT5G67490   | 0        | 0        | 0        | 0        | 0        | 0        | 1        | 0                | 0                       | 1              |

Appendix Table S2

**Appendix Table S2.** PIF-regulated genes according to differential expression data. See legend for details.

| Name      | 1 | 2 | 3 | 4 | 5 | 6 | 7  | pif45_Col | pif45bes1D_bes1D | ALL_PIF |
|-----------|---|---|---|---|---|---|----|-----------|------------------|---------|
| AT1G01060 | 0 | 0 | 0 | 0 | 0 | 0 | -1 | 0         | 0                | -1      |
| AT1G01070 | 0 | 0 | 0 | 1 | 0 | 0 | 0  | 0         | 0                | 1       |
| AT1G01071 | 0 | 0 | 0 | 1 | 0 | 0 | 0  | 0         | 0                | 1       |
| AT1G01072 | 0 | 0 | 0 | 1 | 0 | 0 | 0  | 0         | 0                | 1       |
| AT1G01073 | 0 | 0 | 0 | 1 | 0 | 0 | 0  | 0         | 0                | 1       |
| AT1G01074 | 0 | 0 | 0 | 1 | 0 | 0 | 0  | 0         | 0                | 1       |
| AT1G01075 | 0 | 0 | 0 | 1 | 0 | 0 | 0  | 0         | 0                | 1       |
| AT1G01076 | 0 | 0 | 0 | 1 | 0 | 0 | 0  | 0         | 0                | 1       |
| AT1G01077 | 0 | 0 | 0 | 1 | 0 | 0 | 0  | 0         | 0                | 1       |
| AT1G01078 | 0 | 0 | 0 | 1 | 0 | 0 | 0  | 0         | 0                | 1       |
| AT1G01079 | 0 | 0 | 0 | 1 | 0 | 0 | 0  | 0         | 0                | 1       |
| AT1G01080 | 0 | 0 | 0 | 1 | 0 | 0 | 0  | 0         | 0                | 1       |
| AT1G01081 | 0 | 0 | 0 | 1 | 0 | 0 | 0  | 0         | 0                | 1       |
| AT1G01082 | 0 | 0 | 0 | 1 | 0 | 0 | 0  | 0         | 0                | 1       |
| AT1G01083 | 0 | 0 | 0 | 1 | 0 | 0 | 0  | 0         | 0                | 1       |
| AT1G01084 | 0 | 0 | 0 | 1 | 0 | 0 | 0  | 0         | 0                | 1       |
| AT1G01085 | 0 | 0 | 0 | 1 | 0 | 0 | 0  | 0         | 0                | 1       |
| AT1G01086 | 0 | 0 | 0 | 1 | 0 | 0 | 0  | 0         | 0                | 1       |
| AT1G01087 | 0 | 0 | 0 | 1 | 0 | 0 | 0  | 0         | 0                | 1       |
| AT1G01088 | 0 | 0 | 0 | 1 | 0 | 0 | 0  | 0         | 0                | 1       |
| AT1G01089 | 0 | 0 | 0 | 1 | 0 | 0 | 0  | 0         | 0                | 1       |
| AT1G01090 | 0 | 0 | 0 | 1 | 0 | 0 | 0  | 0         | 0                | 1       |
| AT1G01091 | 0 | 0 | 0 | 1 | 0 | 0 | 0  | 0         | 0                | 1       |
| AT1G01092 | 0 | 0 | 0 | 1 | 0 | 0 | 0  | 0         | 0                | 1       |
| AT1G01093 | 0 | 0 | 0 | 1 | 0 | 0 | 0  | 0         | 0                | 1       |
| AT1G01094 | 0 | 0 | 0 | 1 | 0 | 0 | 0  | 0         | 0                | 1       |
| AT1G01095 | 0 | 0 | 0 | 1 | 0 | 0 | 0  | 0         | 0                | 1       |
| AT1G01096 | 0 | 0 | 0 | 1 | 0 | 0 | 0  | 0         | 0                | 1       |
| AT1G01097 | 0 | 0 | 0 | 1 | 0 | 0 | 0  | 0         | 0                | 1       |
| AT1G01098 | 0 | 0 | 0 | 1 | 0 | 0 | 0  | 0         | 0                | 1       |
| AT1G01099 | 0 | 0 | 0 | 1 | 0 | 0 | 0  | 0         | 0                | 1       |
| AT1G01100 | 0 | 0 | 0 | 1 | 0 | 0 | 0  | 0         | 0                | 1       |
| AT1G01101 | 0 | 0 | 0 | 1 | 0 | 0 | 0  | 0         | 0                | 1       |
| AT1G01102 | 0 | 0 | 0 | 1 | 0 | 0 | 0  | 0         | 0                | 1       |
| AT1G01103 | 0 | 0 | 0 | 1 | 0 | 0 | 0  | 0         | 0                | 1       |
| AT1G01104 | 0 | 0 | 0 | 1 | 0 | 0 | 0  | 0         | 0                | 1       |
| AT1G01105 | 0 | 0 | 0 | 1 | 0 | 0 | 0  | 0         | 0                | 1       |
| AT1G01106 | 0 | 0 | 0 | 1 | 0 | 0 | 0  | 0         | 0                | 1       |
| AT1G01107 | 0 | 0 | 0 | 1 | 0 | 0 | 0  | 0         | 0                | 1       |
| AT1G01108 | 0 | 0 | 0 | 1 | 0 | 0 | 0  | 0         | 0                | 1       |
| AT1G01109 | 0 | 0 | 0 | 1 | 0 | 0 | 0  | 0         | 0                | 1       |
| AT1G01110 | 0 | 0 | 0 | 1 | 0 | 0 | 0  | 0         | 0                | 1       |
| AT1G01111 | 0 | 0 | 0 | 1 | 0 | 0 | 0  | 0         | 0                | 1       |
| AT1G01112 | 0 | 0 | 0 | 1 | 0 | 0 | 0  | 0         | 0                | 1       |
| AT1G01113 | 0 | 0 | 0 | 1 | 0 | 0 | 0  | 0         | 0                | 1       |
| AT1G01114 | 0 | 0 | 0 | 1 | 0 | 0 | 0  | 0         | 0                | 1       |
| AT1G01115 | 0 | 0 | 0 | 1 | 0 | 0 | 0  | 0         | 0                | 1       |
| AT1G01116 | 0 | 0 | 0 | 1 | 0 | 0 | 0  | 0         | 0                | 1       |
| AT1G01117 | 0 | 0 | 0 | 1 | 0 | 0 | 0  | 0         | 0                | 1       |
| AT1G01118 | 0 | 0 | 0 | 1 | 0 | 0 | 0  | 0         | 0                | 1       |
| AT1G01119 | 0 | 0 | 0 | 1 | 0 | 0 | 0  | 0         | 0                | 1       |
| AT1G01120 | 0 | 0 | 0 | 1 | 0 | 0 | 0  | 0         | 0                | 1       |
| AT1G01120 | 0 | 1 | 0 | 1 | 0 | 0 | 0  | 0         | 0                | 1       |
| AT1G01121 | 0 | 0 | 0 | 1 | 0 | 0 | 0  | 0         | 0                | 1       |
| AT1G01122 | 0 | 0 | 0 | 1 | 0 | 0 | 0  | 0         | 0                | 1       |
| AT1G01123 | 0 | 0 | 0 | 1 | 0 | 0 | 0  | 0         | 0                | 1       |
| AT1G01124 | 0 | 0 | 0 | 1 | 0 | 0 | 0  | 0         | 0                | 1       |
| AT1G01125 | 0 | 0 | 0 | 1 | 0 | 0 | 0  | 0         | 0                | 1       |
| AT1G01126 | 0 | 0 | 0 | 1 | 0 | 0 | 0  | 0         | 0                | 1       |

Appendix Table S2

| Name      | 1 | 2 | 3 | 4 | 5 | 6 | 7 | pif45_Col | pif45bes1D_bes1D | ALL_PIF |
|-----------|---|---|---|---|---|---|---|-----------|------------------|---------|
| AT1G01127 | 0 | 0 | 0 | 1 | 0 | 0 | 0 | 0         | 0                | 1       |
| AT1G01128 | 0 | 0 | 0 | 1 | 0 | 0 | 0 | 0         | 0                | 1       |
| AT1G01129 | 0 | 0 | 0 | 1 | 0 | 0 | 0 | 0         | 0                | 1       |
| AT1G01130 | 0 | 0 | 0 | 1 | 0 | 0 | 0 | 0         | 0                | 1       |
| AT1G01131 | 0 | 0 | 0 | 1 | 0 | 0 | 0 | 0         | 0                | 1       |
| AT1G01132 | 0 | 0 | 0 | 1 | 0 | 0 | 0 | 0         | 0                | 1       |
| AT1G01133 | 0 | 0 | 0 | 1 | 0 | 0 | 0 | 0         | 0                | 1       |
| AT1G01134 | 0 | 0 | 0 | 1 | 0 | 0 | 0 | 0         | 0                | 1       |
| AT1G01135 | 0 | 0 | 0 | 1 | 0 | 0 | 0 | 0         | 0                | 1       |
| AT1G01136 | 0 | 0 | 0 | 1 | 0 | 0 | 0 | 0         | 0                | 1       |
| AT1G01137 | 0 | 0 | 0 | 1 | 0 | 0 | 0 | 0         | 0                | 1       |
| AT1G01138 | 0 | 0 | 0 | 1 | 0 | 0 | 0 | 0         | 0                | 1       |
| AT1G01139 | 0 | 0 | 0 | 1 | 0 | 0 | 0 | 0         | 0                | 1       |
| AT1G01140 | 0 | 0 | 0 | 1 | 0 | 0 | 0 | 0         | 0                | 1       |
| AT1G01141 | 0 | 0 | 0 | 1 | 0 | 0 | 0 | 0         | 0                | 1       |
| AT1G01142 | 0 | 0 | 0 | 1 | 0 | 0 | 0 | 0         | 0                | 1       |
| AT1G01143 | 0 | 0 | 0 | 1 | 0 | 0 | 0 | 0         | 0                | 1       |
| AT1G01144 | 0 | 0 | 0 | 1 | 0 | 0 | 0 | 0         | 0                | 1       |
| AT1G01145 | 0 | 0 | 0 | 1 | 0 | 0 | 0 | 0         | 0                | 1       |
| AT1G01146 | 0 | 0 | 0 | 1 | 0 | 0 | 0 | 0         | 0                | 1       |
| AT1G01147 | 0 | 0 | 0 | 1 | 0 | 0 | 0 | 0         | 0                | 1       |
| AT1G01148 | 0 | 0 | 0 | 1 | 0 | 0 | 0 | 0         | 0                | 1       |
| AT1G01149 | 0 | 0 | 0 | 1 | 0 | 0 | 0 | 0         | 0                | 1       |
| AT1G01150 | 0 | 0 | 0 | 1 | 0 | 0 | 0 | 0         | 0                | 1       |
| AT1G01151 | 0 | 0 | 0 | 1 | 0 | 0 | 0 | 0         | 0                | 1       |
| AT1G01152 | 0 | 0 | 0 | 1 | 0 | 0 | 0 | 0         | 0                | 1       |
| AT1G01153 | 0 | 0 | 0 | 1 | 0 | 0 | 0 | 0         | 0                | 1       |
| AT1G01154 | 0 | 0 | 0 | 1 | 0 | 0 | 0 | 0         | 0                | 1       |
| AT1G01155 | 0 | 0 | 0 | 1 | 0 | 0 | 0 | 0         | 0                | 1       |
| AT1G01156 | 0 | 0 | 0 | 1 | 0 | 0 | 0 | 0         | 0                | 1       |
| AT1G01157 | 0 | 0 | 0 | 1 | 0 | 0 | 0 | 0         | 0                | 1       |
| AT1G01158 | 0 | 0 | 0 | 1 | 0 | 0 | 0 | 0         | 0                | 1       |
| AT1G01159 | 0 | 0 | 0 | 1 | 0 | 0 | 0 | 0         | 0                | 1       |
| AT1G01160 | 0 | 0 | 0 | 1 | 0 | 0 | 0 | 0         | 0                | 1       |
| AT1G01161 | 0 | 0 | 0 | 1 | 0 | 0 | 0 | 0         | 0                | 1       |
| AT1G01162 | 0 | 0 | 0 | 1 | 0 | 0 | 0 | 0         | 0                | 1       |
| AT1G01163 | 0 | 0 | 0 | 1 | 0 | 0 | 0 | 0         | 0                | 1       |
| AT1G01164 | 0 | 0 | 0 | 1 | 0 | 0 | 0 | 0         | 0                | 1       |
| AT1G01165 | 0 | 0 | 0 | 1 | 0 | 0 | 0 | 0         | 0                | 1       |
| AT1G01166 | 0 | 0 | 0 | 1 | 0 | 0 | 0 | 0         | 0                | 1       |
| AT1G01167 | 0 | 0 | 0 | 1 | 0 | 0 | 0 | 0         | 0                | 1       |
| AT1G01168 | 0 | 0 | 0 | 1 | 0 | 0 | 0 | 0         | 0                | 1       |
| AT1G01169 | 0 | 0 | 0 | 1 | 0 | 0 | 0 | 0         | 0                | 1       |
| AT1G01170 | 0 | 0 | 0 | 1 | 0 | 0 | 0 | 0         | 0                | 1       |
| AT1G01171 | 0 | 0 | 0 | 1 | 0 | 0 | 0 | 0         | 0                | 1       |
| AT1G01172 | 0 | 0 | 0 | 1 | 0 | 0 | 0 | 0         | 0                | 1       |
| AT1G01173 | 0 | 0 | 0 | 1 | 0 | 0 | 0 | 0         | 0                | 1       |
| AT1G01174 | 0 | 0 | 0 | 1 | 0 | 0 | 0 | 0         | 0                | 1       |
| AT1G01175 | 0 | 0 | 0 | 1 | 0 | 0 | 0 | 0         | 0                | 1       |
| AT1G01176 | 0 | 0 | 0 | 1 | 0 | 0 | 0 | 0         | 0                | 1       |
| AT1G01177 | 0 | 0 | 0 | 1 | 0 | 0 | 0 | 0         | 0                | 1       |
| AT1G01178 | 0 | 0 | 0 | 1 | 0 | 0 | 0 | 0         | 0                | 1       |
| AT1G01179 | 0 | 0 | 0 | 1 | 0 | 0 | 0 | 0         | 0                | 1       |
| AT1G01180 | 0 | 0 | 0 | 1 | 0 | 0 | 0 | 0         | 0                | 1       |
| AT1G01181 | 0 | 0 | 0 | 1 | 0 | 0 | 0 | 0         | 0                | 1       |
| AT1G01182 | 0 | 0 | 0 | 1 | 0 | 0 | 0 | 0         | 0                | 1       |
| AT1G01183 | 0 | 0 | 0 | 1 | 0 | 0 | 0 | 0         | 0                | 1       |
| AT1G01184 | 0 | 0 | 0 | 1 | 0 | 0 | 0 | 0         | 0                | 1       |
| AT1G01185 | 0 | 0 | 0 | 1 | 0 | 0 | 0 | 0         | 0                | 1       |
| AT1G01186 | 0 | 0 | 0 | 1 | 0 | 0 | 0 | 0         | 0                | 1       |
| AT1G01187 | 0 | 0 | 0 | 1 | 0 | 0 | 0 | 0         | 0                | 1       |



Appendix Table S2

| Name      | 1 | 2  | 3 | 4 | 5 | 6 | 7 | pif45_Col | pif45bes1D_bes1D | ALL_PIF |
|-----------|---|----|---|---|---|---|---|-----------|------------------|---------|
| AT1G01188 | 0 | 0  | 0 | 1 | 0 | 0 | 0 | 0         | 0                | 1       |
| AT1G01189 | 0 | 0  | 0 | 1 | 0 | 0 | 0 | 0         | 0                | 1       |
| AT1G01190 | 0 | 0  | 0 | 1 | 0 | 0 | 0 | 0         | 0                | 1       |
| AT1G01191 | 0 | 0  | 0 | 1 | 0 | 0 | 0 | 0         | 0                | 1       |
| AT1G01192 | 0 | 0  | 0 | 1 | 0 | 0 | 0 | 0         | 0                | 1       |
| AT1G01193 | 0 | 0  | 0 | 1 | 0 | 0 | 0 | 0         | 0                | 1       |
| AT1G01194 | 0 | 0  | 0 | 1 | 0 | 0 | 0 | 0         | 0                | 1       |
| AT1G01195 | 0 | 0  | 0 | 1 | 0 | 0 | 0 | 0         | 0                | 1       |
| AT1G01196 | 0 | 0  | 0 | 1 | 0 | 0 | 0 | 0         | 0                | 1       |
| AT1G01197 | 0 | 0  | 0 | 1 | 0 | 0 | 0 | 0         | 0                | 1       |
| AT1G01198 | 0 | 0  | 0 | 1 | 0 | 0 | 0 | 0         | 0                | 1       |
| AT1G01199 | 0 | 0  | 0 | 1 | 0 | 0 | 0 | 0         | 0                | 1       |
| AT1G01200 | 0 | 0  | 0 | 1 | 0 | 0 | 0 | 0         | 0                | 1       |
| AT1G01200 | 0 | 1  | 0 | 1 | 0 | 0 | 1 | 0         | 0                | 1       |
| AT1G01201 | 0 | 0  | 0 | 1 | 0 | 0 | 0 | 0         | 0                | 1       |
| AT1G01202 | 0 | 0  | 0 | 1 | 0 | 0 | 0 | 0         | 0                | 1       |
| AT1G01203 | 0 | 0  | 0 | 1 | 0 | 0 | 0 | 0         | 0                | 1       |
| AT1G01204 | 0 | 0  | 0 | 1 | 0 | 0 | 0 | 0         | 0                | 1       |
| AT1G01205 | 0 | 0  | 0 | 1 | 0 | 0 | 0 | 0         | 0                | 1       |
| AT1G01206 | 0 | 0  | 0 | 1 | 0 | 0 | 0 | 0         | 0                | 1       |
| AT1G01207 | 0 | 0  | 0 | 1 | 0 | 0 | 0 | 0         | 0                | 1       |
| AT1G01208 | 0 | 0  | 0 | 1 | 0 | 0 | 0 | 0         | 0                | 1       |
| AT1G01209 | 0 | 0  | 0 | 1 | 0 | 0 | 0 | 0         | 0                | 1       |
| AT1G01210 | 0 | 0  | 0 | 1 | 0 | 0 | 0 | 0         | 0                | 1       |
| AT1G01211 | 0 | 0  | 0 | 1 | 0 | 0 | 0 | 0         | 0                | 1       |
| AT1G01212 | 0 | 0  | 0 | 1 | 0 | 0 | 0 | 0         | 0                | 1       |
| AT1G01213 | 0 | 0  | 0 | 1 | 0 | 0 | 0 | 0         | 0                | 1       |
| AT1G01214 | 0 | 0  | 0 | 1 | 0 | 0 | 0 | 0         | 0                | 1       |
| AT1G01215 | 0 | 0  | 0 | 1 | 0 | 0 | 0 | 0         | 0                | 1       |
| AT1G01216 | 0 | 0  | 0 | 1 | 0 | 0 | 0 | 0         | 0                | 1       |
| AT1G01217 | 0 | 0  | 0 | 1 | 0 | 0 | 0 | 0         | 0                | 1       |
| AT1G01218 | 0 | 0  | 0 | 1 | 0 | 0 | 0 | 0         | 0                | 1       |
| AT1G01219 | 0 | 0  | 0 | 1 | 0 | 0 | 0 | 0         | 0                | 1       |
| AT1G01220 | 0 | 0  | 0 | 1 | 0 | 0 | 0 | 0         | 0                | 1       |
| AT1G01221 | 0 | 0  | 0 | 1 | 0 | 0 | 0 | 0         | 0                | 1       |
| AT1G01222 | 0 | 0  | 0 | 1 | 0 | 0 | 0 | 0         | 0                | 1       |
| AT1G01223 | 0 | 0  | 0 | 1 | 0 | 0 | 0 | 0         | 0                | 1       |
| AT1G01224 | 0 | 0  | 0 | 1 | 0 | 0 | 0 | 0         | 0                | 1       |
| AT1G01225 | 0 | -1 | 0 | 0 | 0 | 0 | 0 | 0         | 0                | -1      |
| AT1G01225 | 0 | 0  | 0 | 1 | 0 | 0 | 0 | 0         | 0                | 1       |
| AT1G01226 | 0 | 0  | 0 | 1 | 0 | 0 | 0 | 0         | 0                | 1       |
| AT1G01227 | 0 | 0  | 0 | 1 | 0 | 0 | 0 | 0         | 0                | 1       |
| AT1G01228 | 0 | 0  | 0 | 1 | 0 | 0 | 0 | 0         | 0                | 1       |
| AT1G01229 | 0 | 0  | 0 | 1 | 0 | 0 | 0 | 0         | 0                | 1       |
| AT1G01230 | 0 | 0  | 0 | 1 | 0 | 0 | 0 | 0         | 0                | 1       |
| AT1G01231 | 0 | 0  | 0 | 1 | 0 | 0 | 0 | 0         | 0                | 1       |
| AT1G01232 | 0 | 0  | 0 | 1 | 0 | 0 | 0 | 0         | 0                | 1       |
| AT1G01233 | 0 | 0  | 0 | 1 | 0 | 0 | 0 | 0         | 0                | 1       |
| AT1G01234 | 0 | 0  | 0 | 1 | 0 | 0 | 0 | 0         | 0                | 1       |
| AT1G01235 | 0 | 0  | 0 | 1 | 0 | 0 | 0 | 0         | 0                | 1       |
| AT1G01236 | 0 | 0  | 0 | 1 | 0 | 0 | 0 | 0         | 0                | 1       |
| AT1G01237 | 0 | 0  | 0 | 1 | 0 | 0 | 0 | 0         | 0                | 1       |
| AT1G01238 | 0 | 0  | 0 | 1 | 0 | 0 | 0 | 0         | 0                | 1       |
| AT1G01239 | 0 | 0  | 0 | 1 | 0 | 0 | 0 | 0         | 0                | 1       |
| AT1G01240 | 0 | 0  | 0 | 1 | 0 | 0 | 0 | 0         | 0                | 1       |
| AT1G01241 | 0 | 0  | 0 | 1 | 0 | 0 | 0 | 0         | 0                | 1       |
| AT1G01242 | 0 | 0  | 0 | 1 | 0 | 0 | 0 | 0         | 0                | 1       |
| AT1G01243 | 0 | 0  | 0 | 1 | 0 | 0 | 0 | 0         | 0                | 1       |
| AT1G01244 | 0 | 0  | 0 | 1 | 0 | 0 | 0 | 0         | 0                | 1       |
| AT1G01245 | 0 | 0  | 0 | 1 | 0 | 0 | 0 | 0         | 0                | 1       |
| AT1G01246 | 0 | 0  | 0 | 1 | 0 | 0 | 0 | 0         | 0                | 1       |

Appendix Table S2

| Name      | 1 | 2 | 3 | 4 | 5 | 6 | 7  | pif45_Col | pif45bes1D_bes1D | ALL_PIF |
|-----------|---|---|---|---|---|---|----|-----------|------------------|---------|
| AT1G01247 | 0 | 0 | 0 | 1 | 0 | 0 | 0  | 0         | 0                | 1       |
| AT1G01248 | 0 | 0 | 0 | 1 | 0 | 0 | 0  | 0         | 0                | 1       |
| AT1G01249 | 0 | 0 | 0 | 1 | 0 | 0 | 0  | 0         | 0                | 1       |
| AT1G01250 | 0 | 0 | 0 | 1 | 0 | 0 | 0  | 0         | 0                | 1       |
| AT1G01251 | 0 | 0 | 0 | 1 | 0 | 0 | 0  | 0         | 0                | 1       |
| AT1G01252 | 0 | 0 | 0 | 1 | 0 | 0 | 0  | 0         | 0                | 1       |
| AT1G01253 | 0 | 0 | 0 | 1 | 0 | 0 | 0  | 0         | 0                | 1       |
| AT1G01254 | 0 | 0 | 0 | 1 | 0 | 0 | 0  | 0         | 0                | 1       |
| AT1G01255 | 0 | 0 | 0 | 1 | 0 | 0 | 0  | 0         | 0                | 1       |
| AT1G01256 | 0 | 0 | 0 | 1 | 0 | 0 | 0  | 0         | 0                | 1       |
| AT1G01257 | 0 | 0 | 0 | 1 | 0 | 0 | 0  | 0         | 0                | 1       |
| AT1G01258 | 0 | 0 | 0 | 1 | 0 | 0 | 0  | 0         | 0                | 1       |
| AT1G01259 | 0 | 0 | 0 | 1 | 0 | 0 | 0  | 0         | 0                | 1       |
| AT1G01260 | 0 | 0 | 0 | 1 | 0 | 0 | 0  | 0         | 0                | 1       |
| AT1G01261 | 0 | 0 | 0 | 1 | 0 | 0 | 0  | 0         | 0                | 1       |
| AT1G01262 | 0 | 0 | 0 | 1 | 0 | 0 | 0  | 0         | 0                | 1       |
| AT1G01263 | 0 | 0 | 0 | 1 | 0 | 0 | 0  | 0         | 0                | 1       |
| AT1G01264 | 0 | 0 | 0 | 1 | 0 | 0 | 0  | 0         | 0                | 1       |
| AT1G01265 | 0 | 0 | 0 | 1 | 0 | 0 | 0  | 0         | 0                | 1       |
| AT1G01266 | 0 | 0 | 0 | 1 | 0 | 0 | 0  | 0         | 0                | 1       |
| AT1G01267 | 0 | 0 | 0 | 1 | 0 | 0 | 0  | 0         | 0                | 1       |
| AT1G01268 | 0 | 0 | 0 | 1 | 0 | 0 | 0  | 0         | 0                | 1       |
| AT1G01269 | 0 | 0 | 0 | 1 | 0 | 0 | 0  | 0         | 0                | 1       |
| AT1G01270 | 0 | 0 | 0 | 1 | 0 | 0 | 0  | 0         | 0                | 1       |
| AT1G01271 | 0 | 0 | 0 | 1 | 0 | 0 | 0  | 0         | 0                | 1       |
| AT1G01272 | 0 | 0 | 0 | 1 | 0 | 0 | 0  | 0         | 0                | 1       |
| AT1G01273 | 0 | 0 | 0 | 1 | 0 | 0 | 0  | 0         | 0                | 1       |
| AT1G01274 | 0 | 0 | 0 | 1 | 0 | 0 | 0  | 0         | 0                | 1       |
| AT1G01275 | 0 | 0 | 0 | 1 | 0 | 0 | 0  | 0         | 0                | 1       |
| AT1G01276 | 0 | 0 | 0 | 1 | 0 | 0 | 0  | 0         | 0                | 1       |
| AT1G01277 | 0 | 0 | 0 | 1 | 0 | 0 | 0  | 0         | 0                | 1       |
| AT1G01278 | 0 | 0 | 0 | 1 | 0 | 0 | 0  | 0         | 0                | 1       |
| AT1G01279 | 0 | 0 | 0 | 1 | 0 | 0 | 0  | 0         | 0                | 1       |
| AT1G01280 | 0 | 0 | 0 | 1 | 0 | 0 | 0  | 0         | 0                | 1       |
| AT1G01281 | 0 | 0 | 0 | 1 | 0 | 0 | 0  | 0         | 0                | 1       |
| AT1G01282 | 0 | 0 | 0 | 1 | 0 | 0 | 0  | 0         | 0                | 1       |
| AT1G01283 | 0 | 0 | 0 | 1 | 0 | 0 | 0  | 0         | 0                | 1       |
| AT1G01284 | 0 | 0 | 0 | 1 | 0 | 0 | 0  | 0         | 0                | 1       |
| AT1G01285 | 0 | 0 | 0 | 1 | 0 | 0 | 0  | 0         | 0                | 1       |
| AT1G01286 | 0 | 0 | 0 | 1 | 0 | 0 | 0  | 0         | 0                | 1       |
| AT1G01287 | 0 | 0 | 0 | 1 | 0 | 0 | 0  | 0         | 0                | 1       |
| AT1G01288 | 0 | 0 | 0 | 1 | 0 | 0 | 0  | 0         | 0                | 1       |
| AT1G01289 | 0 | 0 | 0 | 1 | 0 | 0 | 0  | 0         | 0                | 1       |
| AT1G01290 | 0 | 0 | 0 | 1 | 0 | 0 | 0  | 0         | 0                | 1       |
| AT1G01291 | 0 | 0 | 0 | 1 | 0 | 0 | 0  | 0         | 0                | 1       |
| AT1G01292 | 0 | 0 | 0 | 1 | 0 | 0 | 0  | 0         | 0                | 1       |
| AT1G01293 | 0 | 0 | 0 | 1 | 0 | 0 | 0  | 0         | 0                | 1       |
| AT1G01294 | 0 | 0 | 0 | 1 | 0 | 0 | 0  | 0         | 0                | 1       |
| AT1G01295 | 0 | 0 | 0 | 1 | 0 | 0 | 0  | 0         | 0                | 1       |
| AT1G01296 | 0 | 0 | 0 | 1 | 0 | 0 | 0  | 0         | 0                | 1       |
| AT1G01297 | 0 | 0 | 0 | 1 | 0 | 0 | 0  | 0         | 0                | 1       |
| AT1G01298 | 0 | 0 | 0 | 1 | 0 | 0 | 0  | 0         | 0                | 1       |
| AT1G01299 | 0 | 0 | 0 | 1 | 0 | 0 | 0  | 0         | 0                | 1       |
| AT1G01300 | 0 | 0 | 0 | 0 | 0 | 0 | -1 | 0         | 0                | -1      |
| AT1G01300 | 0 | 0 | 0 | 1 | 0 | 0 | 0  | 0         | 0                | 1       |
| AT1G01301 | 0 | 0 | 0 | 1 | 0 | 0 | 0  | 0         | 0                | 1       |
| AT1G01302 | 0 | 0 | 0 | 1 | 0 | 0 | 0  | 0         | 0                | 1       |
| AT1G01303 | 0 | 0 | 0 | 1 | 0 | 0 | 0  | 0         | 0                | 1       |
| AT1G01304 | 0 | 0 | 0 | 1 | 0 | 0 | 0  | 0         | 0                | 1       |
| AT1G01305 | 0 | 0 | 0 | 1 | 0 | 0 | 0  | 0         | 0                | 1       |
| AT1G01306 | 0 | 0 | 0 | 1 | 0 | 0 | 0  | 0         | 0                | 1       |

Appendix Table S2

| Name      | 1 | 2 | 3 | 4 | 5 | 6 | 7 | pif45_Col | pif45bes1D_bes1D | ALL_PIF |
|-----------|---|---|---|---|---|---|---|-----------|------------------|---------|
| AT1G01307 | 0 | 0 | 0 | 1 | 0 | 0 | 0 | 0         | 0                | 1       |
| AT1G01308 | 0 | 0 | 0 | 1 | 0 | 0 | 0 | 0         | 0                | 1       |
| AT1G01309 | 0 | 0 | 0 | 1 | 0 | 0 | 0 | 0         | 0                | 1       |
| AT1G01310 | 0 | 0 | 0 | 1 | 0 | 0 | 0 | 0         | 0                | 1       |
| AT1G01311 | 0 | 0 | 0 | 1 | 0 | 0 | 0 | 0         | 0                | 1       |
| AT1G01312 | 0 | 0 | 0 | 1 | 0 | 0 | 0 | 0         | 0                | 1       |
| AT1G01313 | 0 | 0 | 0 | 1 | 0 | 0 | 0 | 0         | 0                | 1       |
| AT1G01314 | 0 | 0 | 0 | 1 | 0 | 0 | 0 | 0         | 0                | 1       |
| AT1G01315 | 0 | 0 | 0 | 1 | 0 | 0 | 0 | 0         | 0                | 1       |
| AT1G01316 | 0 | 0 | 0 | 1 | 0 | 0 | 0 | 0         | 0                | 1       |
| AT1G01317 | 0 | 0 | 0 | 1 | 0 | 0 | 0 | 0         | 0                | 1       |
| AT1G01318 | 0 | 0 | 0 | 1 | 0 | 0 | 0 | 0         | 0                | 1       |
| AT1G01319 | 0 | 0 | 0 | 1 | 0 | 0 | 0 | 0         | 0                | 1       |
| AT1G01320 | 0 | 0 | 0 | 1 | 0 | 0 | 0 | 0         | 0                | 1       |
| AT1G01321 | 0 | 0 | 0 | 1 | 0 | 0 | 0 | 0         | 0                | 1       |
| AT1G01322 | 0 | 0 | 0 | 1 | 0 | 0 | 0 | 0         | 0                | 1       |
| AT1G01323 | 0 | 0 | 0 | 1 | 0 | 0 | 0 | 0         | 0                | 1       |
| AT1G01324 | 0 | 0 | 0 | 1 | 0 | 0 | 0 | 0         | 0                | 1       |
| AT1G01325 | 0 | 0 | 0 | 1 | 0 | 0 | 0 | 0         | 0                | 1       |
| AT1G01326 | 0 | 0 | 0 | 1 | 0 | 0 | 0 | 0         | 0                | 1       |
| AT1G01327 | 0 | 0 | 0 | 1 | 0 | 0 | 0 | 0         | 0                | 1       |
| AT1G01328 | 0 | 0 | 0 | 1 | 0 | 0 | 0 | 0         | 0                | 1       |
| AT1G01329 | 0 | 0 | 0 | 1 | 0 | 0 | 0 | 0         | 0                | 1       |
| AT1G01330 | 0 | 0 | 0 | 1 | 0 | 0 | 0 | 0         | 0                | 1       |
| AT1G01331 | 0 | 0 | 0 | 1 | 0 | 0 | 0 | 0         | 0                | 1       |
| AT1G01332 | 0 | 0 | 0 | 1 | 0 | 0 | 0 | 0         | 0                | 1       |
| AT1G01333 | 0 | 0 | 0 | 1 | 0 | 0 | 0 | 0         | 0                | 1       |
| AT1G01334 | 0 | 0 | 0 | 1 | 0 | 0 | 0 | 0         | 0                | 1       |
| AT1G01335 | 0 | 0 | 0 | 1 | 0 | 0 | 0 | 0         | 0                | 1       |
| AT1G01336 | 0 | 0 | 0 | 1 | 0 | 0 | 0 | 0         | 0                | 1       |
| AT1G01337 | 0 | 0 | 0 | 1 | 0 | 0 | 0 | 0         | 0                | 1       |
| AT1G01338 | 0 | 0 | 0 | 1 | 0 | 0 | 0 | 0         | 0                | 1       |
| AT1G01339 | 0 | 0 | 0 | 1 | 0 | 0 | 0 | 0         | 0                | 1       |
| AT1G01340 | 0 | 0 | 0 | 1 | 0 | 0 | 0 | 0         | 0                | 1       |
| AT1G01341 | 0 | 0 | 0 | 1 | 0 | 0 | 0 | 0         | 0                | 1       |
| AT1G01342 | 0 | 0 | 0 | 1 | 0 | 0 | 0 | 0         | 0                | 1       |
| AT1G01343 | 0 | 0 | 0 | 1 | 0 | 0 | 0 | 0         | 0                | 1       |
| AT1G01344 | 0 | 0 | 0 | 1 | 0 | 0 | 0 | 0         | 0                | 1       |
| AT1G01345 | 0 | 0 | 0 | 1 | 0 | 0 | 0 | 0         | 0                | 1       |
| AT1G01346 | 0 | 0 | 0 | 1 | 0 | 0 | 0 | 0         | 0                | 1       |
| AT1G01347 | 0 | 0 | 0 | 1 | 0 | 0 | 0 | 0         | 0                | 1       |
| AT1G01348 | 0 | 0 | 0 | 1 | 0 | 0 | 0 | 0         | 0                | 1       |
| AT1G01349 | 0 | 0 | 0 | 1 | 0 | 0 | 0 | 0         | 0                | 1       |
| AT1G01350 | 0 | 0 | 0 | 1 | 0 | 0 | 0 | 0         | 0                | 1       |
| AT1G01351 | 0 | 0 | 0 | 1 | 0 | 0 | 0 | 0         | 0                | 1       |
| AT1G01352 | 0 | 0 | 0 | 1 | 0 | 0 | 0 | 0         | 0                | 1       |
| AT1G01353 | 0 | 0 | 0 | 1 | 0 | 0 | 0 | 0         | 0                | 1       |
| AT1G01354 | 0 | 0 | 0 | 1 | 0 | 0 | 0 | 0         | 0                | 1       |
| AT1G01355 | 0 | 0 | 0 | 1 | 0 | 0 | 0 | 0         | 0                | 1       |
| AT1G01356 | 0 | 0 | 0 | 1 | 0 | 0 | 0 | 0         | 0                | 1       |
| AT1G01357 | 0 | 0 | 0 | 1 | 0 | 0 | 0 | 0         | 0                | 1       |
| AT1G01358 | 0 | 0 | 0 | 1 | 0 | 0 | 0 | 0         | 0                | 1       |
| AT1G01359 | 0 | 0 | 0 | 1 | 0 | 0 | 0 | 0         | 0                | 1       |
| AT1G01360 | 0 | 0 | 0 | 1 | 0 | 0 | 0 | 0         | 0                | 1       |
| AT1G01361 | 0 | 0 | 0 | 1 | 0 | 0 | 0 | 0         | 0                | 1       |
| AT1G01362 | 0 | 0 | 0 | 1 | 0 | 0 | 0 | 0         | 0                | 1       |
| AT1G01363 | 0 | 0 | 0 | 1 | 0 | 0 | 0 | 0         | 0                | 1       |
| AT1G01364 | 0 | 0 | 0 | 1 | 0 | 0 | 0 | 0         | 0                | 1       |
| AT1G01365 | 0 | 0 | 0 | 1 | 0 | 0 | 0 | 0         | 0                | 1       |
| AT1G01366 | 0 | 0 | 0 | 1 | 0 | 0 | 0 | 0         | 0                | 1       |
| AT1G01367 | 0 | 0 | 0 | 1 | 0 | 0 | 0 | 0         | 0                | 1       |

Appendix Table S2

| Name      | 1 | 2 | 3 | 4 | 5 | 6 | 7 | pif45_Col | pif45bes1D_bes1D | ALL_PIF |
|-----------|---|---|---|---|---|---|---|-----------|------------------|---------|
| AT1G01368 | 0 | 0 | 0 | 1 | 0 | 0 | 0 | 0         | 0                | 1       |
| AT1G01369 | 0 | 0 | 0 | 1 | 0 | 0 | 0 | 0         | 0                | 1       |
| AT1G01370 | 0 | 0 | 0 | 1 | 0 | 0 | 0 | 0         | 0                | 1       |
| AT1G01371 | 0 | 0 | 0 | 1 | 0 | 0 | 0 | 0         | 0                | 1       |
| AT1G01372 | 0 | 0 | 0 | 1 | 0 | 0 | 0 | 0         | 0                | 1       |
| AT1G01373 | 0 | 0 | 0 | 1 | 0 | 0 | 0 | 0         | 0                | 1       |
| AT1G01374 | 0 | 0 | 0 | 1 | 0 | 0 | 0 | 0         | 0                | 1       |
| AT1G01375 | 0 | 0 | 0 | 1 | 0 | 0 | 0 | 0         | 0                | 1       |
| AT1G01376 | 0 | 0 | 0 | 1 | 0 | 0 | 0 | 0         | 0                | 1       |
| AT1G01377 | 0 | 0 | 0 | 1 | 0 | 0 | 0 | 0         | 0                | 1       |
| AT1G01378 | 0 | 0 | 0 | 1 | 0 | 0 | 0 | 0         | 0                | 1       |
| AT1G01379 | 0 | 0 | 0 | 1 | 0 | 0 | 0 | 0         | 0                | 1       |
| AT1G01380 | 0 | 0 | 0 | 1 | 0 | 0 | 0 | 0         | 0                | 1       |
| AT1G01381 | 0 | 0 | 0 | 1 | 0 | 0 | 0 | 0         | 0                | 1       |
| AT1G01382 | 0 | 0 | 0 | 1 | 0 | 0 | 0 | 0         | 0                | 1       |
| AT1G01383 | 0 | 0 | 0 | 1 | 0 | 0 | 0 | 0         | 0                | 1       |
| AT1G01384 | 0 | 0 | 0 | 1 | 0 | 0 | 0 | 0         | 0                | 1       |
| AT1G01385 | 0 | 0 | 0 | 1 | 0 | 0 | 0 | 0         | 0                | 1       |
| AT1G01386 | 0 | 0 | 0 | 1 | 0 | 0 | 0 | 0         | 0                | 1       |
| AT1G01387 | 0 | 0 | 0 | 1 | 0 | 0 | 0 | 0         | 0                | 1       |
| AT1G01388 | 0 | 0 | 0 | 1 | 0 | 0 | 0 | 0         | 0                | 1       |
| AT1G01389 | 0 | 0 | 0 | 1 | 0 | 0 | 0 | 0         | 0                | 1       |
| AT1G01390 | 0 | 0 | 0 | 1 | 0 | 0 | 0 | 0         | 0                | 1       |
| AT1G01391 | 0 | 0 | 0 | 1 | 0 | 0 | 0 | 0         | 0                | 1       |
| AT1G01392 | 0 | 0 | 0 | 1 | 0 | 0 | 0 | 0         | 0                | 1       |
| AT1G01393 | 0 | 0 | 0 | 1 | 0 | 0 | 0 | 0         | 0                | 1       |
| AT1G01394 | 0 | 0 | 0 | 1 | 0 | 0 | 0 | 0         | 0                | 1       |
| AT1G01395 | 0 | 0 | 0 | 1 | 0 | 0 | 0 | 0         | 0                | 1       |
| AT1G01396 | 0 | 0 | 0 | 1 | 0 | 0 | 0 | 0         | 0                | 1       |
| AT1G01397 | 0 | 0 | 0 | 1 | 0 | 0 | 0 | 0         | 0                | 1       |
| AT1G01398 | 0 | 0 | 0 | 1 | 0 | 0 | 0 | 0         | 0                | 1       |
| AT1G01399 | 0 | 0 | 0 | 1 | 0 | 0 | 0 | 0         | 0                | 1       |
| AT1G01400 | 0 | 0 | 0 | 1 | 0 | 0 | 0 | 0         | 0                | 1       |
| AT1G01401 | 0 | 0 | 0 | 1 | 0 | 0 | 0 | 0         | 0                | 1       |
| AT1G01402 | 0 | 0 | 0 | 1 | 0 | 0 | 0 | 0         | 0                | 1       |
| AT1G01403 | 0 | 0 | 0 | 1 | 0 | 0 | 0 | 0         | 0                | 1       |
| AT1G01404 | 0 | 0 | 0 | 1 | 0 | 0 | 0 | 0         | 0                | 1       |
| AT1G01405 | 0 | 0 | 0 | 1 | 0 | 0 | 0 | 0         | 0                | 1       |
| AT1G01406 | 0 | 0 | 0 | 1 | 0 | 0 | 0 | 0         | 0                | 1       |
| AT1G01407 | 0 | 0 | 0 | 1 | 0 | 0 | 0 | 0         | 0                | 1       |
| AT1G01408 | 0 | 0 | 0 | 1 | 0 | 0 | 0 | 0         | 0                | 1       |
| AT1G01409 | 0 | 0 | 0 | 1 | 0 | 0 | 0 | 0         | 0                | 1       |
| AT1G01410 | 0 | 0 | 0 | 1 | 0 | 0 | 0 | 0         | 0                | 1       |
| AT1G01411 | 0 | 0 | 0 | 1 | 0 | 0 | 0 | 0         | 0                | 1       |
| AT1G01412 | 0 | 0 | 0 | 1 | 0 | 0 | 0 | 0         | 0                | 1       |
| AT1G01413 | 0 | 0 | 0 | 1 | 0 | 0 | 0 | 0         | 0                | 1       |
| AT1G01414 | 0 | 0 | 0 | 1 | 0 | 0 | 0 | 0         | 0                | 1       |
| AT1G01415 | 0 | 0 | 0 | 1 | 0 | 0 | 0 | 0         | 0                | 1       |
| AT1G01416 | 0 | 0 | 0 | 1 | 0 | 0 | 0 | 0         | 0                | 1       |
| AT1G01417 | 0 | 0 | 0 | 1 | 0 | 0 | 0 | 0         | 0                | 1       |
| AT1G01418 | 0 | 0 | 0 | 1 | 0 | 0 | 0 | 0         | 0                | 1       |
| AT1G01419 | 0 | 0 | 0 | 1 | 0 | 0 | 0 | 0         | 0                | 1       |
| AT1G01420 | 0 | 0 | 0 | 1 | 0 | 0 | 0 | 0         | 0                | 1       |
| AT1G01421 | 0 | 0 | 0 | 1 | 0 | 0 | 0 | 0         | 0                | 1       |
| AT1G01422 | 0 | 0 | 0 | 1 | 0 | 0 | 0 | 0         | 0                | 1       |
| AT1G01423 | 0 | 0 | 0 | 1 | 0 | 0 | 0 | 0         | 0                | 1       |
| AT1G01424 | 0 | 0 | 0 | 1 | 0 | 0 | 0 | 0         | 0                | 1       |
| AT1G01425 | 0 | 0 | 0 | 1 | 0 | 0 | 0 | 0         | 0                | 1       |
| AT1G01426 | 0 | 0 | 0 | 1 | 0 | 0 | 0 | 0         | 0                | 1       |
| AT1G01427 | 0 | 0 | 0 | 1 | 0 | 0 | 0 | 0         | 0                | 1       |
| AT1G01428 | 0 | 0 | 0 | 1 | 0 | 0 | 0 | 0         | 0                | 1       |

Appendix Table S2

| Name      | 1 | 2 | 3 | 4 | 5 | 6 | 7 | pif45_Col | pif45bes1D_bes1D | ALL_PIF |
|-----------|---|---|---|---|---|---|---|-----------|------------------|---------|
| AT1G01429 | 0 | 0 | 0 | 1 | 0 | 0 | 0 | 0         | 0                | 1       |
| AT1G01430 | 0 | 0 | 0 | 1 | 0 | 0 | 0 | 0         | 0                | 1       |
| AT1G01431 | 0 | 0 | 0 | 1 | 0 | 0 | 0 | 0         | 0                | 1       |
| AT1G01432 | 0 | 0 | 0 | 1 | 0 | 0 | 0 | 0         | 0                | 1       |
| AT1G01433 | 0 | 0 | 0 | 1 | 0 | 0 | 0 | 0         | 0                | 1       |
| AT1G01434 | 0 | 0 | 0 | 1 | 0 | 0 | 0 | 0         | 0                | 1       |
| AT1G01435 | 0 | 0 | 0 | 1 | 0 | 0 | 0 | 0         | 0                | 1       |
| AT1G01436 | 0 | 0 | 0 | 1 | 0 | 0 | 0 | 0         | 0                | 1       |
| AT1G01437 | 0 | 0 | 0 | 1 | 0 | 0 | 0 | 0         | 0                | 1       |
| AT1G01438 | 0 | 0 | 0 | 1 | 0 | 0 | 0 | 0         | 0                | 1       |
| AT1G01439 | 0 | 0 | 0 | 1 | 0 | 0 | 0 | 0         | 0                | 1       |
| AT1G01440 | 0 | 0 | 0 | 1 | 0 | 0 | 0 | 0         | 0                | 1       |
| AT1G01441 | 0 | 0 | 0 | 1 | 0 | 0 | 0 | 0         | 0                | 1       |
| AT1G01442 | 0 | 0 | 0 | 1 | 0 | 0 | 0 | 0         | 0                | 1       |
| AT1G01443 | 0 | 0 | 0 | 1 | 0 | 0 | 0 | 0         | 0                | 1       |
| AT1G01444 | 0 | 0 | 0 | 1 | 0 | 0 | 0 | 0         | 0                | 1       |
| AT1G01445 | 0 | 0 | 0 | 1 | 0 | 0 | 0 | 0         | 0                | 1       |
| AT1G01446 | 0 | 0 | 0 | 1 | 0 | 0 | 0 | 0         | 0                | 1       |
| AT1G01447 | 0 | 0 | 0 | 1 | 0 | 0 | 0 | 0         | 0                | 1       |
| AT1G01448 | 0 | 0 | 0 | 1 | 0 | 0 | 0 | 0         | 0                | 1       |
| AT1G01449 | 0 | 0 | 0 | 1 | 0 | 0 | 0 | 0         | 0                | 1       |
| AT1G01450 | 0 | 0 | 0 | 1 | 0 | 0 | 0 | 0         | 0                | 1       |
| AT1G01451 | 0 | 0 | 0 | 1 | 0 | 0 | 0 | 0         | 0                | 1       |
| AT1G01452 | 0 | 0 | 0 | 1 | 0 | 0 | 0 | 0         | 0                | 1       |
| AT1G01453 | 0 | 0 | 0 | 1 | 0 | 0 | 0 | 0         | 0                | 1       |
| AT1G01454 | 0 | 0 | 0 | 1 | 0 | 0 | 0 | 0         | 0                | 1       |
| AT1G01455 | 0 | 0 | 0 | 1 | 0 | 0 | 0 | 0         | 0                | 1       |
| AT1G01456 | 0 | 0 | 0 | 1 | 0 | 0 | 0 | 0         | 0                | 1       |
| AT1G01457 | 0 | 0 | 0 | 1 | 0 | 0 | 0 | 0         | 0                | 1       |
| AT1G01458 | 0 | 0 | 0 | 1 | 0 | 0 | 0 | 0         | 0                | 1       |
| AT1G01459 | 0 | 0 | 0 | 1 | 0 | 0 | 0 | 0         | 0                | 1       |
| AT1G01460 | 0 | 0 | 0 | 1 | 0 | 0 | 0 | 0         | 0                | 1       |
| AT1G01461 | 0 | 0 | 0 | 1 | 0 | 0 | 0 | 0         | 0                | 1       |
| AT1G01462 | 0 | 0 | 0 | 1 | 0 | 0 | 0 | 0         | 0                | 1       |
| AT1G01463 | 0 | 0 | 0 | 1 | 0 | 0 | 0 | 0         | 0                | 1       |
| AT1G01464 | 0 | 0 | 0 | 1 | 0 | 0 | 0 | 0         | 0                | 1       |
| AT1G01465 | 0 | 0 | 0 | 1 | 0 | 0 | 0 | 0         | 0                | 1       |
| AT1G01466 | 0 | 0 | 0 | 1 | 0 | 0 | 0 | 0         | 0                | 1       |
| AT1G01467 | 0 | 0 | 0 | 1 | 0 | 0 | 0 | 0         | 0                | 1       |
| AT1G01468 | 0 | 0 | 0 | 1 | 0 | 0 | 0 | 0         | 0                | 1       |
| AT1G01469 | 0 | 0 | 0 | 1 | 0 | 0 | 0 | 0         | 0                | 1       |
| AT1G01470 | 0 | 0 | 0 | 1 | 0 | 0 | 0 | 0         | 0                | 1       |
| AT1G01470 | 0 | 1 | 0 | 1 | 0 | 0 | 1 | 0         | 0                | 1       |
| AT1G01471 | 0 | 0 | 0 | 1 | 0 | 0 | 0 | 0         | 0                | 1       |
| AT1G01472 | 0 | 0 | 0 | 1 | 0 | 0 | 0 | 0         | 0                | 1       |
| AT1G01473 | 0 | 0 | 0 | 1 | 0 | 0 | 0 | 0         | 0                | 1       |
| AT1G01474 | 0 | 0 | 0 | 1 | 0 | 0 | 0 | 0         | 0                | 1       |
| AT1G01475 | 0 | 0 | 0 | 1 | 0 | 0 | 0 | 0         | 0                | 1       |
| AT1G01476 | 0 | 0 | 0 | 1 | 0 | 0 | 0 | 0         | 0                | 1       |
| AT1G01477 | 0 | 0 | 0 | 1 | 0 | 0 | 0 | 0         | 0                | 1       |
| AT1G01478 | 0 | 0 | 0 | 1 | 0 | 0 | 0 | 0         | 0                | 1       |
| AT1G01479 | 0 | 0 | 0 | 1 | 0 | 0 | 0 | 0         | 0                | 1       |
| AT1G01480 | 0 | 0 | 0 | 1 | 0 | 0 | 0 | 0         | 0                | 1       |
| AT1G01481 | 0 | 0 | 0 | 1 | 0 | 0 | 0 | 0         | 0                | 1       |
| AT1G01482 | 0 | 0 | 0 | 1 | 0 | 0 | 0 | 0         | 0                | 1       |
| AT1G01483 | 0 | 0 | 0 | 1 | 0 | 0 | 0 | 0         | 0                | 1       |
| AT1G01484 | 0 | 0 | 0 | 1 | 0 | 0 | 0 | 0         | 0                | 1       |
| AT1G01485 | 0 | 0 | 0 | 1 | 0 | 0 | 0 | 0         | 0                | 1       |
| AT1G01486 | 0 | 0 | 0 | 1 | 0 | 0 | 0 | 0         | 0                | 1       |
| AT1G01487 | 0 | 0 | 0 | 1 | 0 | 0 | 0 | 0         | 0                | 1       |
| AT1G01488 | 0 | 0 | 0 | 1 | 0 | 0 | 0 | 0         | 0                | 1       |

Appendix Table S2

| Name      | 1 | 2 | 3 | 4 | 5 | 6 | 7 | pif45_Col | pif45bes1D_bes1D | ALL_PIF |
|-----------|---|---|---|---|---|---|---|-----------|------------------|---------|
| AT1G01489 | 0 | 0 | 0 | 1 | 0 | 0 | 0 | 0         | 0                | 1       |
| AT1G01490 | 0 | 0 | 0 | 1 | 0 | 0 | 0 | 0         | 0                | 1       |
| AT1G01491 | 0 | 0 | 0 | 1 | 0 | 0 | 0 | 0         | 0                | 1       |
| AT1G01492 | 0 | 0 | 0 | 1 | 0 | 0 | 0 | 0         | 0                | 1       |
| AT1G01493 | 0 | 0 | 0 | 1 | 0 | 0 | 0 | 0         | 0                | 1       |
| AT1G01494 | 0 | 0 | 0 | 1 | 0 | 0 | 0 | 0         | 0                | 1       |
| AT1G01495 | 0 | 0 | 0 | 1 | 0 | 0 | 0 | 0         | 0                | 1       |
| AT1G01496 | 0 | 0 | 0 | 1 | 0 | 0 | 0 | 0         | 0                | 1       |
| AT1G01497 | 0 | 0 | 0 | 1 | 0 | 0 | 0 | 0         | 0                | 1       |
| AT1G01498 | 0 | 0 | 0 | 1 | 0 | 0 | 0 | 0         | 0                | 1       |
| AT1G01499 | 0 | 0 | 0 | 1 | 0 | 0 | 0 | 0         | 0                | 1       |
| AT1G01500 | 0 | 0 | 0 | 1 | 0 | 0 | 0 | 0         | 0                | 1       |
| AT1G01501 | 0 | 0 | 0 | 1 | 0 | 0 | 0 | 0         | 0                | 1       |
| AT1G01502 | 0 | 0 | 0 | 1 | 0 | 0 | 0 | 0         | 0                | 1       |
| AT1G01503 | 0 | 0 | 0 | 1 | 0 | 0 | 0 | 0         | 0                | 1       |
| AT1G01504 | 0 | 0 | 0 | 1 | 0 | 0 | 0 | 0         | 0                | 1       |
| AT1G01505 | 0 | 0 | 0 | 1 | 0 | 0 | 0 | 0         | 0                | 1       |
| AT1G01506 | 0 | 0 | 0 | 1 | 0 | 0 | 0 | 0         | 0                | 1       |
| AT1G01507 | 0 | 0 | 0 | 1 | 0 | 0 | 0 | 0         | 0                | 1       |
| AT1G01508 | 0 | 0 | 0 | 1 | 0 | 0 | 0 | 0         | 0                | 1       |
| AT1G01509 | 0 | 0 | 0 | 1 | 0 | 0 | 0 | 0         | 0                | 1       |
| AT1G01510 | 0 | 0 | 0 | 1 | 0 | 0 | 0 | 0         | 0                | 1       |
| AT1G01511 | 0 | 0 | 0 | 1 | 0 | 0 | 0 | 0         | 0                | 1       |
| AT1G01512 | 0 | 0 | 0 | 1 | 0 | 0 | 0 | 0         | 0                | 1       |
| AT1G01513 | 0 | 0 | 0 | 1 | 0 | 0 | 0 | 0         | 0                | 1       |
| AT1G01514 | 0 | 0 | 0 | 1 | 0 | 0 | 0 | 0         | 0                | 1       |
| AT1G01515 | 0 | 0 | 0 | 1 | 0 | 0 | 0 | 0         | 0                | 1       |
| AT1G01516 | 0 | 0 | 0 | 1 | 0 | 0 | 0 | 0         | 0                | 1       |
| AT1G01517 | 0 | 0 | 0 | 1 | 0 | 0 | 0 | 0         | 0                | 1       |
| AT1G01518 | 0 | 0 | 0 | 1 | 0 | 0 | 0 | 0         | 0                | 1       |
| AT1G01519 | 0 | 0 | 0 | 1 | 0 | 0 | 0 | 0         | 0                | 1       |
| AT1G01520 | 0 | 0 | 0 | 1 | 0 | 0 | 0 | 0         | 0                | 1       |
| AT1G01521 | 0 | 0 | 0 | 1 | 0 | 0 | 0 | 0         | 0                | 1       |
| AT1G01522 | 0 | 0 | 0 | 1 | 0 | 0 | 0 | 0         | 0                | 1       |
| AT1G01523 | 0 | 0 | 0 | 1 | 0 | 0 | 0 | 0         | 0                | 1       |
| AT1G01524 | 0 | 0 | 0 | 1 | 0 | 0 | 0 | 0         | 0                | 1       |
| AT1G01525 | 0 | 0 | 0 | 1 | 0 | 0 | 0 | 0         | 0                | 1       |
| AT1G01526 | 0 | 0 | 0 | 1 | 0 | 0 | 0 | 0         | 0                | 1       |
| AT1G01527 | 0 | 0 | 0 | 1 | 0 | 0 | 0 | 0         | 0                | 1       |
| AT1G01528 | 0 | 0 | 0 | 1 | 0 | 0 | 0 | 0         | 0                | 1       |
| AT1G01529 | 0 | 0 | 0 | 1 | 0 | 0 | 0 | 0         | 0                | 1       |
| AT1G01530 | 0 | 0 | 0 | 1 | 0 | 0 | 0 | 0         | 0                | 1       |
| AT1G01531 | 0 | 0 | 0 | 1 | 0 | 0 | 0 | 0         | 0                | 1       |
| AT1G01532 | 0 | 0 | 0 | 1 | 0 | 0 | 0 | 0         | 0                | 1       |
| AT1G01533 | 0 | 0 | 0 | 1 | 0 | 0 | 0 | 0         | 0                | 1       |
| AT1G01534 | 0 | 0 | 0 | 1 | 0 | 0 | 0 | 0         | 0                | 1       |
| AT1G01535 | 0 | 0 | 0 | 1 | 0 | 0 | 0 | 0         | 0                | 1       |
| AT1G01536 | 0 | 0 | 0 | 1 | 0 | 0 | 0 | 0         | 0                | 1       |
| AT1G01537 | 0 | 0 | 0 | 1 | 0 | 0 | 0 | 0         | 0                | 1       |
| AT1G01538 | 0 | 0 | 0 | 1 | 0 | 0 | 0 | 0         | 0                | 1       |
| AT1G01539 | 0 | 0 | 0 | 1 | 0 | 0 | 0 | 0         | 0                | 1       |
| AT1G01540 | 0 | 0 | 0 | 1 | 0 | 0 | 0 | 0         | 0                | 1       |
| AT1G01541 | 0 | 0 | 0 | 1 | 0 | 0 | 0 | 0         | 0                | 1       |
| AT1G01542 | 0 | 0 | 0 | 1 | 0 | 0 | 0 | 0         | 0                | 1       |
| AT1G01543 | 0 | 0 | 0 | 1 | 0 | 0 | 0 | 0         | 0                | 1       |
| AT1G01544 | 0 | 0 | 0 | 1 | 0 | 0 | 0 | 0         | 0                | 1       |
| AT1G01545 | 0 | 0 | 0 | 1 | 0 | 0 | 0 | 0         | 0                | 1       |
| AT1G01546 | 0 | 0 | 0 | 1 | 0 | 0 | 0 | 0         | 0                | 1       |
| AT1G01547 | 0 | 0 | 0 | 1 | 0 | 0 | 0 | 0         | 0                | 1       |
| AT1G01548 | 0 | 0 | 0 | 1 | 0 | 0 | 0 | 0         | 0                | 1       |
| AT1G01549 | 0 | 0 | 0 | 1 | 0 | 0 | 0 | 0         | 0                | 1       |

Appendix Table S2

| Name      | 1 | 2 | 3 | 4  | 5 | 6 | 7 | pif45_Col | pif45bes1D_bes1D | ALL_PIF |
|-----------|---|---|---|----|---|---|---|-----------|------------------|---------|
| AT1G01550 | 0 | 0 | 0 | 1  | 0 | 0 | 0 | 0         | 0                | 1       |
| AT1G01551 | 0 | 0 | 0 | 1  | 0 | 0 | 0 | 0         | 0                | 1       |
| AT1G01552 | 0 | 0 | 0 | 1  | 0 | 0 | 0 | 0         | 0                | 1       |
| AT1G01553 | 0 | 0 | 0 | 1  | 0 | 0 | 0 | 0         | 0                | 1       |
| AT1G01554 | 0 | 0 | 0 | 1  | 0 | 0 | 0 | 0         | 0                | 1       |
| AT1G01555 | 0 | 0 | 0 | 1  | 0 | 0 | 0 | 0         | 0                | 1       |
| AT1G01556 | 0 | 0 | 0 | 1  | 0 | 0 | 0 | 0         | 0                | 1       |
| AT1G01557 | 0 | 0 | 0 | 1  | 0 | 0 | 0 | 0         | 0                | 1       |
| AT1G01558 | 0 | 0 | 0 | 1  | 0 | 0 | 0 | 0         | 0                | 1       |
| AT1G01559 | 0 | 0 | 0 | 1  | 0 | 0 | 0 | 0         | 0                | 1       |
| AT1G01560 | 0 | 0 | 0 | -1 | 0 | 0 | 0 | 0         | 0                | -1      |
| AT1G01560 | 0 | 0 | 0 | 1  | 0 | 0 | 0 | 0         | 0                | 1       |
| AT1G01561 | 0 | 0 | 0 | 1  | 0 | 0 | 0 | 0         | 0                | 1       |
| AT1G01562 | 0 | 0 | 0 | 1  | 0 | 0 | 0 | 0         | 0                | 1       |
| AT1G01563 | 0 | 0 | 0 | 1  | 0 | 0 | 0 | 0         | 0                | 1       |
| AT1G01564 | 0 | 0 | 0 | 1  | 0 | 0 | 0 | 0         | 0                | 1       |
| AT1G01565 | 0 | 0 | 0 | 1  | 0 | 0 | 0 | 0         | 0                | 1       |
| AT1G01566 | 0 | 0 | 0 | 1  | 0 | 0 | 0 | 0         | 0                | 1       |
| AT1G01567 | 0 | 0 | 0 | 1  | 0 | 0 | 0 | 0         | 0                | 1       |
| AT1G01568 | 0 | 0 | 0 | 1  | 0 | 0 | 0 | 0         | 0                | 1       |
| AT1G01569 | 0 | 0 | 0 | 1  | 0 | 0 | 0 | 0         | 0                | 1       |
| AT1G01570 | 0 | 0 | 0 | 1  | 0 | 0 | 0 | 0         | 0                | 1       |
| AT1G01571 | 0 | 0 | 0 | 1  | 0 | 0 | 0 | 0         | 0                | 1       |
| AT1G01572 | 0 | 0 | 0 | 1  | 0 | 0 | 0 | 0         | 0                | 1       |
| AT1G01573 | 0 | 0 | 0 | 1  | 0 | 0 | 0 | 0         | 0                | 1       |
| AT1G01574 | 0 | 0 | 0 | 1  | 0 | 0 | 0 | 0         | 0                | 1       |
| AT1G01575 | 0 | 0 | 0 | 1  | 0 | 0 | 0 | 0         | 0                | 1       |
| AT1G01576 | 0 | 0 | 0 | 1  | 0 | 0 | 0 | 0         | 0                | 1       |
| AT1G01577 | 0 | 0 | 0 | 1  | 0 | 0 | 0 | 0         | 0                | 1       |
| AT1G01578 | 0 | 0 | 0 | 1  | 0 | 0 | 0 | 0         | 0                | 1       |
| AT1G01579 | 0 | 0 | 0 | 1  | 0 | 0 | 0 | 0         | 0                | 1       |
| AT1G01580 | 0 | 0 | 0 | -1 | 0 | 0 | 0 | 0         | 0                | -1      |
| AT1G01580 | 0 | 0 | 0 | 1  | 0 | 0 | 0 | 0         | 0                | 1       |
| AT1G01581 | 0 | 0 | 0 | 1  | 0 | 0 | 0 | 0         | 0                | 1       |
| AT1G01582 | 0 | 0 | 0 | 1  | 0 | 0 | 0 | 0         | 0                | 1       |
| AT1G01583 | 0 | 0 | 0 | 1  | 0 | 0 | 0 | 0         | 0                | 1       |
| AT1G01584 | 0 | 0 | 0 | 1  | 0 | 0 | 0 | 0         | 0                | 1       |
| AT1G01585 | 0 | 0 | 0 | 1  | 0 | 0 | 0 | 0         | 0                | 1       |
| AT1G01586 | 0 | 0 | 0 | 1  | 0 | 0 | 0 | 0         | 0                | 1       |
| AT1G01587 | 0 | 0 | 0 | 1  | 0 | 0 | 0 | 0         | 0                | 1       |
| AT1G01588 | 0 | 0 | 0 | 1  | 0 | 0 | 0 | 0         | 0                | 1       |
| AT1G01589 | 0 | 0 | 0 | 1  | 0 | 0 | 0 | 0         | 0                | 1       |
| AT1G01590 | 0 | 0 | 0 | 1  | 0 | 0 | 0 | 0         | 0                | 1       |
| AT1G01591 | 0 | 0 | 0 | 1  | 0 | 0 | 0 | 0         | 0                | 1       |
| AT1G01592 | 0 | 0 | 0 | 1  | 0 | 0 | 0 | 0         | 0                | 1       |
| AT1G01593 | 0 | 0 | 0 | 1  | 0 | 0 | 0 | 0         | 0                | 1       |
| AT1G01594 | 0 | 0 | 0 | 1  | 0 | 0 | 0 | 0         | 0                | 1       |
| AT1G01595 | 0 | 0 | 0 | 1  | 0 | 0 | 0 | 0         | 0                | 1       |
| AT1G01596 | 0 | 0 | 0 | 1  | 0 | 0 | 0 | 0         | 0                | 1       |
| AT1G01597 | 0 | 0 | 0 | 1  | 0 | 0 | 0 | 0         | 0                | 1       |
| AT1G01598 | 0 | 0 | 0 | 1  | 0 | 0 | 0 | 0         | 0                | 1       |
| AT1G01599 | 0 | 0 | 0 | 1  | 0 | 0 | 0 | 0         | 0                | 1       |
| AT1G01600 | 0 | 0 | 0 | 1  | 0 | 0 | 0 | 0         | 0                | 1       |
| AT1G01600 | 0 | 1 | 0 | 1  | 0 | 1 | 1 | 1         | 0                | 1       |
| AT1G01601 | 0 | 0 | 0 | 1  | 0 | 0 | 0 | 0         | 0                | 1       |
| AT1G01602 | 0 | 0 | 0 | 1  | 0 | 0 | 0 | 0         | 0                | 1       |
| AT1G01603 | 0 | 0 | 0 | 1  | 0 | 0 | 0 | 0         | 0                | 1       |
| AT1G01604 | 0 | 0 | 0 | 1  | 0 | 0 | 0 | 0         | 0                | 1       |
| AT1G01605 | 0 | 0 | 0 | 1  | 0 | 0 | 0 | 0         | 0                | 1       |
| AT1G01606 | 0 | 0 | 0 | 1  | 0 | 0 | 0 | 0         | 0                | 1       |
| AT1G01607 | 0 | 0 | 0 | 1  | 0 | 0 | 0 | 0         | 0                | 1       |

Appendix Table S2

| Name      | 1 | 2 | 3 | 4 | 5 | 6 | 7 | pif45_Col | pif45bes1D_bes1D | ALL_PIF |
|-----------|---|---|---|---|---|---|---|-----------|------------------|---------|
| AT1G01608 | 0 | 0 | 0 | 1 | 0 | 0 | 0 | 0         | 0                | 1       |
| AT1G01609 | 0 | 0 | 0 | 1 | 0 | 0 | 0 | 0         | 0                | 1       |
| AT1G01610 | 0 | 0 | 0 | 1 | 0 | 0 | 0 | 0         | 0                | 1       |
| AT1G01611 | 0 | 0 | 0 | 1 | 0 | 0 | 0 | 0         | 0                | 1       |
| AT1G01612 | 0 | 0 | 0 | 1 | 0 | 0 | 0 | 0         | 0                | 1       |
| AT1G01613 | 0 | 0 | 0 | 1 | 0 | 0 | 0 | 0         | 0                | 1       |
| AT1G01614 | 0 | 0 | 0 | 1 | 0 | 0 | 0 | 0         | 0                | 1       |
| AT1G01615 | 0 | 0 | 0 | 1 | 0 | 0 | 0 | 0         | 0                | 1       |
| AT1G01616 | 0 | 0 | 0 | 1 | 0 | 0 | 0 | 0         | 0                | 1       |
| AT1G01617 | 0 | 0 | 0 | 1 | 0 | 0 | 0 | 0         | 0                | 1       |
| AT1G01618 | 0 | 0 | 0 | 1 | 0 | 0 | 0 | 0         | 0                | 1       |
| AT1G01619 | 0 | 0 | 0 | 1 | 0 | 0 | 0 | 0         | 0                | 1       |
| AT1G01620 | 0 | 0 | 0 | 1 | 0 | 0 | 0 | 0         | 0                | 1       |
| AT1G01621 | 0 | 0 | 0 | 1 | 0 | 0 | 0 | 0         | 0                | 1       |
| AT1G01622 | 0 | 0 | 0 | 1 | 0 | 0 | 0 | 0         | 0                | 1       |
| AT1G01623 | 0 | 0 | 0 | 1 | 0 | 0 | 0 | 0         | 0                | 1       |
| AT1G01624 | 0 | 0 | 0 | 1 | 0 | 0 | 0 | 0         | 0                | 1       |
| AT1G01625 | 0 | 0 | 0 | 1 | 0 | 0 | 0 | 0         | 0                | 1       |
| AT1G01626 | 0 | 0 | 0 | 1 | 0 | 0 | 0 | 0         | 0                | 1       |
| AT1G01627 | 0 | 0 | 0 | 1 | 0 | 0 | 0 | 0         | 0                | 1       |
| AT1G01628 | 0 | 0 | 0 | 1 | 0 | 0 | 0 | 0         | 0                | 1       |
| AT1G01629 | 0 | 0 | 0 | 1 | 0 | 0 | 0 | 0         | 0                | 1       |
| AT1G01630 | 0 | 0 | 0 | 1 | 0 | 0 | 0 | 0         | 0                | 1       |
| AT1G01631 | 0 | 0 | 0 | 1 | 0 | 0 | 0 | 0         | 0                | 1       |
| AT1G01632 | 0 | 0 | 0 | 1 | 0 | 0 | 0 | 0         | 0                | 1       |
| AT1G01633 | 0 | 0 | 0 | 1 | 0 | 0 | 0 | 0         | 0                | 1       |
| AT1G01634 | 0 | 0 | 0 | 1 | 0 | 0 | 0 | 0         | 0                | 1       |
| AT1G01635 | 0 | 0 | 0 | 1 | 0 | 0 | 0 | 0         | 0                | 1       |
| AT1G01636 | 0 | 0 | 0 | 1 | 0 | 0 | 0 | 0         | 0                | 1       |
| AT1G01637 | 0 | 0 | 0 | 1 | 0 | 0 | 0 | 0         | 0                | 1       |
| AT1G01638 | 0 | 0 | 0 | 1 | 0 | 0 | 0 | 0         | 0                | 1       |
| AT1G01639 | 0 | 0 | 0 | 1 | 0 | 0 | 0 | 0         | 0                | 1       |
| AT1G01640 | 0 | 0 | 0 | 1 | 0 | 0 | 0 | 0         | 0                | 1       |
| AT1G01641 | 0 | 0 | 0 | 1 | 0 | 0 | 0 | 0         | 0                | 1       |
| AT1G01642 | 0 | 0 | 0 | 1 | 0 | 0 | 0 | 0         | 0                | 1       |
| AT1G01643 | 0 | 0 | 0 | 1 | 0 | 0 | 0 | 0         | 0                | 1       |
| AT1G01644 | 0 | 0 | 0 | 1 | 0 | 0 | 0 | 0         | 0                | 1       |
| AT1G01645 | 0 | 0 | 0 | 1 | 0 | 0 | 0 | 0         | 0                | 1       |
| AT1G01646 | 0 | 0 | 0 | 1 | 0 | 0 | 0 | 0         | 0                | 1       |
| AT1G01647 | 0 | 0 | 0 | 1 | 0 | 0 | 0 | 0         | 0                | 1       |
| AT1G01648 | 0 | 0 | 0 | 1 | 0 | 0 | 0 | 0         | 0                | 1       |
| AT1G01649 | 0 | 0 | 0 | 1 | 0 | 0 | 0 | 0         | 0                | 1       |
| AT1G01650 | 0 | 0 | 0 | 1 | 0 | 0 | 0 | 0         | 0                | 1       |
| AT1G01651 | 0 | 0 | 0 | 1 | 0 | 0 | 0 | 0         | 0                | 1       |
| AT1G01652 | 0 | 0 | 0 | 1 | 0 | 0 | 0 | 0         | 0                | 1       |
| AT1G01653 | 0 | 0 | 0 | 1 | 0 | 0 | 0 | 0         | 0                | 1       |
| AT1G01654 | 0 | 0 | 0 | 1 | 0 | 0 | 0 | 0         | 0                | 1       |
| AT1G01655 | 0 | 0 | 0 | 1 | 0 | 0 | 0 | 0         | 0                | 1       |
| AT1G01656 | 0 | 0 | 0 | 1 | 0 | 0 | 0 | 0         | 0                | 1       |
| AT1G01657 | 0 | 0 | 0 | 1 | 0 | 0 | 0 | 0         | 0                | 1       |
| AT1G01658 | 0 | 0 | 0 | 1 | 0 | 0 | 0 | 0         | 0                | 1       |
| AT1G01659 | 0 | 0 | 0 | 1 | 0 | 0 | 0 | 0         | 0                | 1       |
| AT1G01660 | 0 | 0 | 0 | 1 | 0 | 0 | 0 | 0         | 0                | 1       |
| AT1G01661 | 0 | 0 | 0 | 1 | 0 | 0 | 0 | 0         | 0                | 1       |
| AT1G01662 | 0 | 0 | 0 | 1 | 0 | 0 | 0 | 0         | 0                | 1       |
| AT1G01663 | 0 | 0 | 0 | 1 | 0 | 0 | 0 | 0         | 0                | 1       |
| AT1G01664 | 0 | 0 | 0 | 1 | 0 | 0 | 0 | 0         | 0                | 1       |
| AT1G01665 | 0 | 0 | 0 | 1 | 0 | 0 | 0 | 0         | 0                | 1       |
| AT1G01666 | 0 | 0 | 0 | 1 | 0 | 0 | 0 | 0         | 0                | 1       |
| AT1G01667 | 0 | 0 | 0 | 1 | 0 | 0 | 0 | 0         | 0                | 1       |
| AT1G01668 | 0 | 0 | 0 | 1 | 0 | 0 | 0 | 0         | 0                | 1       |



Appendix Table S2

| Name      | 1 | 2 | 3 | 4  | 5 | 6 | 7 | pif45_Col | pif45bes1D_bes1D | ALL_PIF |
|-----------|---|---|---|----|---|---|---|-----------|------------------|---------|
| AT1G01669 | 0 | 0 | 0 | 1  | 0 | 0 | 0 | 0         | 0                | 1       |
| AT1G01670 | 0 | 0 | 0 | 1  | 0 | 0 | 0 | 0         | 0                | 1       |
| AT1G01671 | 0 | 0 | 0 | 1  | 0 | 0 | 0 | 0         | 0                | 1       |
| AT1G01672 | 0 | 0 | 0 | 1  | 0 | 0 | 0 | 0         | 0                | 1       |
| AT1G01673 | 0 | 0 | 0 | 1  | 0 | 0 | 0 | 0         | 0                | 1       |
| AT1G01674 | 0 | 0 | 0 | 1  | 0 | 0 | 0 | 0         | 0                | 1       |
| AT1G01675 | 0 | 0 | 0 | 1  | 0 | 0 | 0 | 0         | 0                | 1       |
| AT1G01676 | 0 | 0 | 0 | 1  | 0 | 0 | 0 | 0         | 0                | 1       |
| AT1G01677 | 0 | 0 | 0 | 1  | 0 | 0 | 0 | 0         | 0                | 1       |
| AT1G01678 | 0 | 0 | 0 | 1  | 0 | 0 | 0 | 0         | 0                | 1       |
| AT1G01679 | 0 | 0 | 0 | 1  | 0 | 0 | 0 | 0         | 0                | 1       |
| AT1G01680 | 0 | 0 | 0 | 1  | 0 | 0 | 0 | 0         | 0                | 1       |
| AT1G01681 | 0 | 0 | 0 | 1  | 0 | 0 | 0 | 0         | 0                | 1       |
| AT1G01682 | 0 | 0 | 0 | 1  | 0 | 0 | 0 | 0         | 0                | 1       |
| AT1G01683 | 0 | 0 | 0 | 1  | 0 | 0 | 0 | 0         | 0                | 1       |
| AT1G01684 | 0 | 0 | 0 | 1  | 0 | 0 | 0 | 0         | 0                | 1       |
| AT1G01685 | 0 | 0 | 0 | 1  | 0 | 0 | 0 | 0         | 0                | 1       |
| AT1G01686 | 0 | 0 | 0 | 1  | 0 | 0 | 0 | 0         | 0                | 1       |
| AT1G01687 | 0 | 0 | 0 | 1  | 0 | 0 | 0 | 0         | 0                | 1       |
| AT1G01688 | 0 | 0 | 0 | 1  | 0 | 0 | 0 | 0         | 0                | 1       |
| AT1G01689 | 0 | 0 | 0 | 1  | 0 | 0 | 0 | 0         | 0                | 1       |
| AT1G01690 | 0 | 0 | 0 | 1  | 0 | 0 | 0 | 0         | 0                | 1       |
| AT1G01691 | 0 | 0 | 0 | 1  | 0 | 0 | 0 | 0         | 0                | 1       |
| AT1G01692 | 0 | 0 | 0 | 1  | 0 | 0 | 0 | 0         | 0                | 1       |
| AT1G01693 | 0 | 0 | 0 | 1  | 0 | 0 | 0 | 0         | 0                | 1       |
| AT1G01694 | 0 | 0 | 0 | 1  | 0 | 0 | 0 | 0         | 0                | 1       |
| AT1G01695 | 0 | 0 | 0 | 1  | 0 | 0 | 0 | 0         | 0                | 1       |
| AT1G01696 | 0 | 0 | 0 | 1  | 0 | 0 | 0 | 0         | 0                | 1       |
| AT1G01697 | 0 | 0 | 0 | 1  | 0 | 0 | 0 | 0         | 0                | 1       |
| AT1G01698 | 0 | 0 | 0 | 1  | 0 | 0 | 0 | 0         | 0                | 1       |
| AT1G01699 | 0 | 0 | 0 | 1  | 0 | 0 | 0 | 0         | 0                | 1       |
| AT1G01700 | 0 | 0 | 0 | 1  | 0 | 0 | 0 | 0         | 0                | 1       |
| AT1G01701 | 0 | 0 | 0 | 1  | 0 | 0 | 0 | 0         | 0                | 1       |
| AT1G01702 | 0 | 0 | 0 | 1  | 0 | 0 | 0 | 0         | 0                | 1       |
| AT1G01703 | 0 | 0 | 0 | 1  | 0 | 0 | 0 | 0         | 0                | 1       |
| AT1G01704 | 0 | 0 | 0 | 1  | 0 | 0 | 0 | 0         | 0                | 1       |
| AT1G01705 | 0 | 0 | 0 | 1  | 0 | 0 | 0 | 0         | 0                | 1       |
| AT1G01706 | 0 | 0 | 0 | 1  | 0 | 0 | 0 | 0         | 0                | 1       |
| AT1G01707 | 0 | 0 | 0 | 1  | 0 | 0 | 0 | 0         | 0                | 1       |
| AT1G01708 | 0 | 0 | 0 | 1  | 0 | 0 | 0 | 0         | 0                | 1       |
| AT1G01709 | 0 | 0 | 0 | 1  | 0 | 0 | 0 | 0         | 0                | 1       |
| AT1G01710 | 0 | 0 | 0 | 1  | 0 | 0 | 0 | 0         | 0                | 1       |
| AT1G01711 | 0 | 0 | 0 | 1  | 0 | 0 | 0 | 0         | 0                | 1       |
| AT1G01712 | 0 | 0 | 0 | 1  | 0 | 0 | 0 | 0         | 0                | 1       |
| AT1G01713 | 0 | 0 | 0 | 1  | 0 | 0 | 0 | 0         | 0                | 1       |
| AT1G01714 | 0 | 0 | 0 | 1  | 0 | 0 | 0 | 0         | 0                | 1       |
| AT1G01715 | 0 | 0 | 0 | 1  | 0 | 0 | 0 | 0         | 0                | 1       |
| AT1G01716 | 0 | 0 | 0 | 1  | 0 | 0 | 0 | 0         | 0                | 1       |
| AT1G01717 | 0 | 0 | 0 | 1  | 0 | 0 | 0 | 0         | 0                | 1       |
| AT1G01718 | 0 | 0 | 0 | 1  | 0 | 0 | 0 | 0         | 0                | 1       |
| AT1G01719 | 0 | 0 | 0 | 1  | 0 | 0 | 0 | 0         | 0                | 1       |
| AT1G01720 | 0 | 0 | 0 | 1  | 0 | 0 | 0 | 0         | 0                | 1       |
| AT1G01721 | 0 | 0 | 0 | 1  | 0 | 0 | 0 | 0         | 0                | 1       |
| AT1G01722 | 0 | 0 | 0 | 1  | 0 | 0 | 0 | 0         | 0                | 1       |
| AT1G01723 | 0 | 0 | 0 | 1  | 0 | 0 | 0 | 0         | 0                | 1       |
| AT1G01724 | 0 | 0 | 0 | 1  | 0 | 0 | 0 | 0         | 0                | 1       |
| AT1G01725 | 0 | 0 | 0 | -1 | 0 | 0 | 0 | 0         | 0                | -1      |
| AT1G01725 | 0 | 0 | 0 | 1  | 0 | 0 | 0 | 0         | 0                | 1       |
| AT1G01726 | 0 | 0 | 0 | 1  | 0 | 0 | 0 | 0         | 0                | 1       |
| AT1G01727 | 0 | 0 | 0 | 1  | 0 | 0 | 0 | 0         | 0                | 1       |
| AT1G01728 | 0 | 0 | 0 | 1  | 0 | 0 | 0 | 0         | 0                | 1       |

Appendix Table S2

| Name      | 1 | 2 | 3 | 4 | 5 | 6 | 7 | pif45_Col | pif45bes1D_bes1D | ALL_PIF |
|-----------|---|---|---|---|---|---|---|-----------|------------------|---------|
| AT1G01729 | 0 | 0 | 0 | 1 | 0 | 0 | 0 | 0         | 0                | 1       |
| AT1G01730 | 0 | 0 | 0 | 1 | 0 | 0 | 0 | 0         | 0                | 1       |
| AT1G01731 | 0 | 0 | 0 | 1 | 0 | 0 | 0 | 0         | 0                | 1       |
| AT1G01732 | 0 | 0 | 0 | 1 | 0 | 0 | 0 | 0         | 0                | 1       |
| AT1G01733 | 0 | 0 | 0 | 1 | 0 | 0 | 0 | 0         | 0                | 1       |
| AT1G01734 | 0 | 0 | 0 | 1 | 0 | 0 | 0 | 0         | 0                | 1       |
| AT1G01735 | 0 | 0 | 0 | 1 | 0 | 0 | 0 | 0         | 0                | 1       |
| AT1G01736 | 0 | 0 | 0 | 1 | 0 | 0 | 0 | 0         | 0                | 1       |
| AT1G01737 | 0 | 0 | 0 | 1 | 0 | 0 | 0 | 0         | 0                | 1       |
| AT1G01738 | 0 | 0 | 0 | 1 | 0 | 0 | 0 | 0         | 0                | 1       |
| AT1G01739 | 0 | 0 | 0 | 1 | 0 | 0 | 0 | 0         | 0                | 1       |
| AT1G01740 | 0 | 0 | 0 | 1 | 0 | 0 | 0 | 0         | 0                | 1       |
| AT1G01741 | 0 | 0 | 0 | 1 | 0 | 0 | 0 | 0         | 0                | 1       |
| AT1G01742 | 0 | 0 | 0 | 1 | 0 | 0 | 0 | 0         | 0                | 1       |
| AT1G01743 | 0 | 0 | 0 | 1 | 0 | 0 | 0 | 0         | 0                | 1       |
| AT1G01744 | 0 | 0 | 0 | 1 | 0 | 0 | 0 | 0         | 0                | 1       |
| AT1G01745 | 0 | 0 | 0 | 1 | 0 | 0 | 0 | 0         | 0                | 1       |
| AT1G01746 | 0 | 0 | 0 | 1 | 0 | 0 | 0 | 0         | 0                | 1       |
| AT1G01747 | 0 | 0 | 0 | 1 | 0 | 0 | 0 | 0         | 0                | 1       |
| AT1G01748 | 0 | 0 | 0 | 1 | 0 | 0 | 0 | 0         | 0                | 1       |
| AT1G01749 | 0 | 0 | 0 | 1 | 0 | 0 | 0 | 0         | 0                | 1       |
| AT1G01750 | 0 | 0 | 0 | 1 | 0 | 0 | 0 | 0         | 0                | 1       |
| AT1G01751 | 0 | 0 | 0 | 1 | 0 | 0 | 0 | 0         | 0                | 1       |
| AT1G01752 | 0 | 0 | 0 | 1 | 0 | 0 | 0 | 0         | 0                | 1       |
| AT1G01753 | 0 | 0 | 0 | 1 | 0 | 0 | 0 | 0         | 0                | 1       |
| AT1G01754 | 0 | 0 | 0 | 1 | 0 | 0 | 0 | 0         | 0                | 1       |
| AT1G01755 | 0 | 0 | 0 | 1 | 0 | 0 | 0 | 0         | 0                | 1       |
| AT1G01756 | 0 | 0 | 0 | 1 | 0 | 0 | 0 | 0         | 0                | 1       |
| AT1G01757 | 0 | 0 | 0 | 1 | 0 | 0 | 0 | 0         | 0                | 1       |
| AT1G01758 | 0 | 0 | 0 | 1 | 0 | 0 | 0 | 0         | 0                | 1       |
| AT1G01759 | 0 | 0 | 0 | 1 | 0 | 0 | 0 | 0         | 0                | 1       |
| AT1G01760 | 0 | 0 | 0 | 1 | 0 | 0 | 0 | 0         | 0                | 1       |
| AT1G01761 | 0 | 0 | 0 | 1 | 0 | 0 | 0 | 0         | 0                | 1       |
| AT1G01762 | 0 | 0 | 0 | 1 | 0 | 0 | 0 | 0         | 0                | 1       |
| AT1G01763 | 0 | 0 | 0 | 1 | 0 | 0 | 0 | 0         | 0                | 1       |
| AT1G01764 | 0 | 0 | 0 | 1 | 0 | 0 | 0 | 0         | 0                | 1       |
| AT1G01765 | 0 | 0 | 0 | 1 | 0 | 0 | 0 | 0         | 0                | 1       |
| AT1G01766 | 0 | 0 | 0 | 1 | 0 | 0 | 0 | 0         | 0                | 1       |
| AT1G01767 | 0 | 0 | 0 | 1 | 0 | 0 | 0 | 0         | 0                | 1       |
| AT1G01768 | 0 | 0 | 0 | 1 | 0 | 0 | 0 | 0         | 0                | 1       |
| AT1G01769 | 0 | 0 | 0 | 1 | 0 | 0 | 0 | 0         | 0                | 1       |
| AT1G01770 | 0 | 0 | 0 | 1 | 0 | 0 | 0 | 0         | 0                | 1       |
| AT1G01771 | 0 | 0 | 0 | 1 | 0 | 0 | 0 | 0         | 0                | 1       |
| AT1G01772 | 0 | 0 | 0 | 1 | 0 | 0 | 0 | 0         | 0                | 1       |
| AT1G01773 | 0 | 0 | 0 | 1 | 0 | 0 | 0 | 0         | 0                | 1       |
| AT1G01774 | 0 | 0 | 0 | 1 | 0 | 0 | 0 | 0         | 0                | 1       |
| AT1G01775 | 0 | 0 | 0 | 1 | 0 | 0 | 0 | 0         | 0                | 1       |
| AT1G01776 | 0 | 0 | 0 | 1 | 0 | 0 | 0 | 0         | 0                | 1       |
| AT1G01777 | 0 | 0 | 0 | 1 | 0 | 0 | 0 | 0         | 0                | 1       |
| AT1G01778 | 0 | 0 | 0 | 1 | 0 | 0 | 0 | 0         | 0                | 1       |
| AT1G01779 | 0 | 0 | 0 | 1 | 0 | 0 | 0 | 0         | 0                | 1       |
| AT1G01780 | 0 | 0 | 0 | 1 | 0 | 0 | 0 | 0         | 0                | 1       |
| AT1G01781 | 0 | 0 | 0 | 1 | 0 | 0 | 0 | 0         | 0                | 1       |
| AT1G01782 | 0 | 0 | 0 | 1 | 0 | 0 | 0 | 0         | 0                | 1       |
| AT1G01783 | 0 | 0 | 0 | 1 | 0 | 0 | 0 | 0         | 0                | 1       |
| AT1G01784 | 0 | 0 | 0 | 1 | 0 | 0 | 0 | 0         | 0                | 1       |
| AT1G01785 | 0 | 0 | 0 | 1 | 0 | 0 | 0 | 0         | 0                | 1       |
| AT1G01786 | 0 | 0 | 0 | 1 | 0 | 0 | 0 | 0         | 0                | 1       |
| AT1G01787 | 0 | 0 | 0 | 1 | 0 | 0 | 0 | 0         | 0                | 1       |
| AT1G01788 | 0 | 0 | 0 | 1 | 0 | 0 | 0 | 0         | 0                | 1       |
| AT1G01789 | 0 | 0 | 0 | 1 | 0 | 0 | 0 | 0         | 0                | 1       |

Appendix Table S2

| Name      | 1 | 2 | 3 | 4 | 5 | 6 | 7  | pif45_Col | pif45bes1D_bes1D | ALL_PIF |
|-----------|---|---|---|---|---|---|----|-----------|------------------|---------|
| AT1G01790 | 0 | 0 | 0 | 0 | 0 | 0 | -1 | 0         | 0                | -1      |
| AT1G01790 | 0 | 0 | 0 | 1 | 0 | 0 | 0  | 0         | 0                | 1       |
| AT1G01791 | 0 | 0 | 0 | 1 | 0 | 0 | 0  | 0         | 0                | 1       |
| AT1G01792 | 0 | 0 | 0 | 1 | 0 | 0 | 0  | 0         | 0                | 1       |
| AT1G01793 | 0 | 0 | 0 | 1 | 0 | 0 | 0  | 0         | 0                | 1       |
| AT1G01794 | 0 | 0 | 0 | 1 | 0 | 0 | 0  | 0         | 0                | 1       |
| AT1G01795 | 0 | 0 | 0 | 1 | 0 | 0 | 0  | 0         | 0                | 1       |
| AT1G01796 | 0 | 0 | 0 | 1 | 0 | 0 | 0  | 0         | 0                | 1       |
| AT1G01797 | 0 | 0 | 0 | 1 | 0 | 0 | 0  | 0         | 0                | 1       |
| AT1G01798 | 0 | 0 | 0 | 1 | 0 | 0 | 0  | 0         | 0                | 1       |
| AT1G01799 | 0 | 0 | 0 | 1 | 0 | 0 | 0  | 0         | 0                | 1       |
| AT1G01800 | 0 | 0 | 0 | 1 | 0 | 0 | 0  | 0         | 0                | 1       |
| AT1G01801 | 0 | 0 | 0 | 1 | 0 | 0 | 0  | 0         | 0                | 1       |
| AT1G01802 | 0 | 0 | 0 | 1 | 0 | 0 | 0  | 0         | 0                | 1       |
| AT1G01803 | 0 | 0 | 0 | 1 | 0 | 0 | 0  | 0         | 0                | 1       |
| AT1G01804 | 0 | 0 | 0 | 1 | 0 | 0 | 0  | 0         | 0                | 1       |
| AT1G01805 | 0 | 0 | 0 | 1 | 0 | 0 | 0  | 0         | 0                | 1       |
| AT1G01806 | 0 | 0 | 0 | 1 | 0 | 0 | 0  | 0         | 0                | 1       |
| AT1G01807 | 0 | 0 | 0 | 1 | 0 | 0 | 0  | 0         | 0                | 1       |
| AT1G01808 | 0 | 0 | 0 | 1 | 0 | 0 | 0  | 0         | 0                | 1       |
| AT1G01809 | 0 | 0 | 0 | 1 | 0 | 0 | 0  | 0         | 0                | 1       |
| AT1G01810 | 0 | 0 | 0 | 1 | 0 | 0 | 0  | 0         | 0                | 1       |
| AT1G01811 | 0 | 0 | 0 | 1 | 0 | 0 | 0  | 0         | 0                | 1       |
| AT1G01812 | 0 | 0 | 0 | 1 | 0 | 0 | 0  | 0         | 0                | 1       |
| AT1G01813 | 0 | 0 | 0 | 1 | 0 | 0 | 0  | 0         | 0                | 1       |
| AT1G01814 | 0 | 0 | 0 | 1 | 0 | 0 | 0  | 0         | 0                | 1       |
| AT1G01815 | 0 | 0 | 0 | 1 | 0 | 0 | 0  | 0         | 0                | 1       |
| AT1G01816 | 0 | 0 | 0 | 1 | 0 | 0 | 0  | 0         | 0                | 1       |
| AT1G01817 | 0 | 0 | 0 | 1 | 0 | 0 | 0  | 0         | 0                | 1       |
| AT1G01818 | 0 | 0 | 0 | 1 | 0 | 0 | 0  | 0         | 0                | 1       |
| AT1G01819 | 0 | 0 | 0 | 1 | 0 | 0 | 0  | 0         | 0                | 1       |
| AT1G01820 | 0 | 0 | 0 | 1 | 0 | 0 | 0  | 0         | 0                | 1       |
| AT1G01821 | 0 | 0 | 0 | 1 | 0 | 0 | 0  | 0         | 0                | 1       |
| AT1G01822 | 0 | 0 | 0 | 1 | 0 | 0 | 0  | 0         | 0                | 1       |
| AT1G01823 | 0 | 0 | 0 | 1 | 0 | 0 | 0  | 0         | 0                | 1       |
| AT1G01824 | 0 | 0 | 0 | 1 | 0 | 0 | 0  | 0         | 0                | 1       |
| AT1G01825 | 0 | 0 | 0 | 1 | 0 | 0 | 0  | 0         | 0                | 1       |
| AT1G01826 | 0 | 0 | 0 | 1 | 0 | 0 | 0  | 0         | 0                | 1       |
| AT1G01827 | 0 | 0 | 0 | 1 | 0 | 0 | 0  | 0         | 0                | 1       |
| AT1G01828 | 0 | 0 | 0 | 1 | 0 | 0 | 0  | 0         | 0                | 1       |
| AT1G01829 | 0 | 0 | 0 | 1 | 0 | 0 | 0  | 0         | 0                | 1       |
| AT1G01830 | 0 | 0 | 0 | 1 | 0 | 0 | 0  | 0         | 0                | 1       |
| AT1G01831 | 0 | 0 | 0 | 1 | 0 | 0 | 0  | 0         | 0                | 1       |
| AT1G01832 | 0 | 0 | 0 | 1 | 0 | 0 | 0  | 0         | 0                | 1       |
| AT1G01833 | 0 | 0 | 0 | 1 | 0 | 0 | 0  | 0         | 0                | 1       |
| AT1G01834 | 0 | 0 | 0 | 1 | 0 | 0 | 0  | 0         | 0                | 1       |
| AT1G01835 | 0 | 0 | 0 | 1 | 0 | 0 | 0  | 0         | 0                | 1       |
| AT1G01836 | 0 | 0 | 0 | 1 | 0 | 0 | 0  | 0         | 0                | 1       |
| AT1G01837 | 0 | 0 | 0 | 1 | 0 | 0 | 0  | 0         | 0                | 1       |
| AT1G01838 | 0 | 0 | 0 | 1 | 0 | 0 | 0  | 0         | 0                | 1       |
| AT1G01839 | 0 | 0 | 0 | 1 | 0 | 0 | 0  | 0         | 0                | 1       |
| AT1G01840 | 0 | 0 | 0 | 1 | 0 | 0 | 0  | 0         | 0                | 1       |
| AT1G01841 | 0 | 0 | 0 | 1 | 0 | 0 | 0  | 0         | 0                | 1       |
| AT1G01842 | 0 | 0 | 0 | 1 | 0 | 0 | 0  | 0         | 0                | 1       |
| AT1G01843 | 0 | 0 | 0 | 1 | 0 | 0 | 0  | 0         | 0                | 1       |
| AT1G01844 | 0 | 0 | 0 | 1 | 0 | 0 | 0  | 0         | 0                | 1       |
| AT1G01845 | 0 | 0 | 0 | 1 | 0 | 0 | 0  | 0         | 0                | 1       |
| AT1G01846 | 0 | 0 | 0 | 1 | 0 | 0 | 0  | 0         | 0                | 1       |
| AT1G01847 | 0 | 0 | 0 | 1 | 0 | 0 | 0  | 0         | 0                | 1       |
| AT1G01848 | 0 | 0 | 0 | 1 | 0 | 0 | 0  | 0         | 0                | 1       |
| AT1G01849 | 0 | 0 | 0 | 1 | 0 | 0 | 0  | 0         | 0                | 1       |

Appendix Table S2

| Name      | 1 | 2 | 3 | 4 | 5 | 6 | 7 | pif45_Col | pif45bes1D_bes1D | ALL_PIF |
|-----------|---|---|---|---|---|---|---|-----------|------------------|---------|
| AT1G01850 | 0 | 0 | 0 | 1 | 0 | 0 | 0 | 0         | 0                | 1       |
| AT1G01851 | 0 | 0 | 0 | 1 | 0 | 0 | 0 | 0         | 0                | 1       |
| AT1G01852 | 0 | 0 | 0 | 1 | 0 | 0 | 0 | 0         | 0                | 1       |
| AT1G01853 | 0 | 0 | 0 | 1 | 0 | 0 | 0 | 0         | 0                | 1       |
| AT1G01854 | 0 | 0 | 0 | 1 | 0 | 0 | 0 | 0         | 0                | 1       |
| AT1G01855 | 0 | 0 | 0 | 1 | 0 | 0 | 0 | 0         | 0                | 1       |
| AT1G01856 | 0 | 0 | 0 | 1 | 0 | 0 | 0 | 0         | 0                | 1       |
| AT1G01857 | 0 | 0 | 0 | 1 | 0 | 0 | 0 | 0         | 0                | 1       |
| AT1G01858 | 0 | 0 | 0 | 1 | 0 | 0 | 0 | 0         | 0                | 1       |
| AT1G01859 | 0 | 0 | 0 | 1 | 0 | 0 | 0 | 0         | 0                | 1       |
| AT1G01860 | 0 | 0 | 0 | 1 | 0 | 0 | 0 | 0         | 0                | 1       |
| AT1G01861 | 0 | 0 | 0 | 1 | 0 | 0 | 0 | 0         | 0                | 1       |
| AT1G01862 | 0 | 0 | 0 | 1 | 0 | 0 | 0 | 0         | 0                | 1       |
| AT1G01863 | 0 | 0 | 0 | 1 | 0 | 0 | 0 | 0         | 0                | 1       |
| AT1G01864 | 0 | 0 | 0 | 1 | 0 | 0 | 0 | 0         | 0                | 1       |
| AT1G01865 | 0 | 0 | 0 | 1 | 0 | 0 | 0 | 0         | 0                | 1       |
| AT1G01866 | 0 | 0 | 0 | 1 | 0 | 0 | 0 | 0         | 0                | 1       |
| AT1G01867 | 0 | 0 | 0 | 1 | 0 | 0 | 0 | 0         | 0                | 1       |
| AT1G01868 | 0 | 0 | 0 | 1 | 0 | 0 | 0 | 0         | 0                | 1       |
| AT1G01869 | 0 | 0 | 0 | 1 | 0 | 0 | 0 | 0         | 0                | 1       |
| AT1G01870 | 0 | 0 | 0 | 1 | 0 | 0 | 0 | 0         | 0                | 1       |
| AT1G01871 | 0 | 0 | 0 | 1 | 0 | 0 | 0 | 0         | 0                | 1       |
| AT1G01872 | 0 | 0 | 0 | 1 | 0 | 0 | 0 | 0         | 0                | 1       |
| AT1G01873 | 0 | 0 | 0 | 1 | 0 | 0 | 0 | 0         | 0                | 1       |
| AT1G01874 | 0 | 0 | 0 | 1 | 0 | 0 | 0 | 0         | 0                | 1       |
| AT1G01875 | 0 | 0 | 0 | 1 | 0 | 0 | 0 | 0         | 0                | 1       |
| AT1G01876 | 0 | 0 | 0 | 1 | 0 | 0 | 0 | 0         | 0                | 1       |
| AT1G01877 | 0 | 0 | 0 | 1 | 0 | 0 | 0 | 0         | 0                | 1       |
| AT1G01878 | 0 | 0 | 0 | 1 | 0 | 0 | 0 | 0         | 0                | 1       |
| AT1G01879 | 0 | 0 | 0 | 1 | 0 | 0 | 0 | 0         | 0                | 1       |
| AT1G01880 | 0 | 0 | 0 | 1 | 0 | 0 | 0 | 0         | 0                | 1       |
| AT1G01881 | 0 | 0 | 0 | 1 | 0 | 0 | 0 | 0         | 0                | 1       |
| AT1G01882 | 0 | 0 | 0 | 1 | 0 | 0 | 0 | 0         | 0                | 1       |
| AT1G01883 | 0 | 0 | 0 | 1 | 0 | 0 | 0 | 0         | 0                | 1       |
| AT1G01884 | 0 | 0 | 0 | 1 | 0 | 0 | 0 | 0         | 0                | 1       |
| AT1G01885 | 0 | 0 | 0 | 1 | 0 | 0 | 0 | 0         | 0                | 1       |
| AT1G01886 | 0 | 0 | 0 | 1 | 0 | 0 | 0 | 0         | 0                | 1       |
| AT1G01887 | 0 | 0 | 0 | 1 | 0 | 0 | 0 | 0         | 0                | 1       |
| AT1G01888 | 0 | 0 | 0 | 1 | 0 | 0 | 0 | 0         | 0                | 1       |
| AT1G01889 | 0 | 0 | 0 | 1 | 0 | 0 | 0 | 0         | 0                | 1       |
| AT1G01890 | 0 | 0 | 0 | 1 | 0 | 0 | 0 | 0         | 0                | 1       |
| AT1G01891 | 0 | 0 | 0 | 1 | 0 | 0 | 0 | 0         | 0                | 1       |
| AT1G01892 | 0 | 0 | 0 | 1 | 0 | 0 | 0 | 0         | 0                | 1       |
| AT1G01893 | 0 | 0 | 0 | 1 | 0 | 0 | 0 | 0         | 0                | 1       |
| AT1G01894 | 0 | 0 | 0 | 1 | 0 | 0 | 0 | 0         | 0                | 1       |
| AT1G01895 | 0 | 0 | 0 | 1 | 0 | 0 | 0 | 0         | 0                | 1       |
| AT1G01896 | 0 | 0 | 0 | 1 | 0 | 0 | 0 | 0         | 0                | 1       |
| AT1G01897 | 0 | 0 | 0 | 1 | 0 | 0 | 0 | 0         | 0                | 1       |
| AT1G01898 | 0 | 0 | 0 | 1 | 0 | 0 | 0 | 0         | 0                | 1       |
| AT1G01899 | 0 | 0 | 0 | 1 | 0 | 0 | 0 | 0         | 0                | 1       |
| AT1G01900 | 0 | 0 | 0 | 1 | 0 | 0 | 0 | 0         | 0                | 1       |
| AT1G01901 | 0 | 0 | 0 | 1 | 0 | 0 | 0 | 0         | 0                | 1       |
| AT1G01902 | 0 | 0 | 0 | 1 | 0 | 0 | 0 | 0         | 0                | 1       |
| AT1G01903 | 0 | 0 | 0 | 1 | 0 | 0 | 0 | 0         | 0                | 1       |
| AT1G01904 | 0 | 0 | 0 | 1 | 0 | 0 | 0 | 0         | 0                | 1       |
| AT1G01905 | 0 | 0 | 0 | 1 | 0 | 0 | 0 | 0         | 0                | 1       |
| AT1G01906 | 0 | 0 | 0 | 1 | 0 | 0 | 0 | 0         | 0                | 1       |
| AT1G01907 | 0 | 0 | 0 | 1 | 0 | 0 | 0 | 0         | 0                | 1       |
| AT1G01908 | 0 | 0 | 0 | 1 | 0 | 0 | 0 | 0         | 0                | 1       |
| AT1G01909 | 0 | 0 | 0 | 1 | 0 | 0 | 0 | 0         | 0                | 1       |
| AT1G01910 | 0 | 0 | 0 | 1 | 0 | 0 | 0 | 0         | 0                | 1       |

Appendix Table S2

| Name      | 1 | 2 | 3 | 4 | 5 | 6 | 7 | pif45_Col | pif45bes1D_bes1D | ALL_PIF |
|-----------|---|---|---|---|---|---|---|-----------|------------------|---------|
| AT1G01911 | 0 | 0 | 0 | 1 | 0 | 0 | 0 | 0         | 0                | 1       |
| AT1G01912 | 0 | 0 | 0 | 1 | 0 | 0 | 0 | 0         | 0                | 1       |
| AT1G01913 | 0 | 0 | 0 | 1 | 0 | 0 | 0 | 0         | 0                | 1       |
| AT1G01914 | 0 | 0 | 0 | 1 | 0 | 0 | 0 | 0         | 0                | 1       |
| AT1G01915 | 0 | 0 | 0 | 1 | 0 | 0 | 0 | 0         | 0                | 1       |
| AT1G01916 | 0 | 0 | 0 | 1 | 0 | 0 | 0 | 0         | 0                | 1       |
| AT1G01917 | 0 | 0 | 0 | 1 | 0 | 0 | 0 | 0         | 0                | 1       |
| AT1G01918 | 0 | 0 | 0 | 1 | 0 | 0 | 0 | 0         | 0                | 1       |
| AT1G01919 | 0 | 0 | 0 | 1 | 0 | 0 | 0 | 0         | 0                | 1       |
| AT1G01920 | 0 | 0 | 0 | 1 | 0 | 0 | 0 | 0         | 0                | 1       |
| AT1G01921 | 0 | 0 | 0 | 1 | 0 | 0 | 0 | 0         | 0                | 1       |
| AT1G01922 | 0 | 0 | 0 | 1 | 0 | 0 | 0 | 0         | 0                | 1       |
| AT1G01923 | 0 | 0 | 0 | 1 | 0 | 0 | 0 | 0         | 0                | 1       |
| AT1G01924 | 0 | 0 | 0 | 1 | 0 | 0 | 0 | 0         | 0                | 1       |
| AT1G01925 | 0 | 0 | 0 | 1 | 0 | 0 | 0 | 0         | 0                | 1       |
| AT1G01926 | 0 | 0 | 0 | 1 | 0 | 0 | 0 | 0         | 0                | 1       |
| AT1G01927 | 0 | 0 | 0 | 1 | 0 | 0 | 0 | 0         | 0                | 1       |
| AT1G01928 | 0 | 0 | 0 | 1 | 0 | 0 | 0 | 0         | 0                | 1       |
| AT1G01929 | 0 | 0 | 0 | 1 | 0 | 0 | 0 | 0         | 0                | 1       |
| AT1G01930 | 0 | 0 | 0 | 1 | 0 | 0 | 0 | 0         | 0                | 1       |
| AT1G01931 | 0 | 0 | 0 | 1 | 0 | 0 | 0 | 0         | 0                | 1       |
| AT1G01932 | 0 | 0 | 0 | 1 | 0 | 0 | 0 | 0         | 0                | 1       |
| AT1G01933 | 0 | 0 | 0 | 1 | 0 | 0 | 0 | 0         | 0                | 1       |
| AT1G01934 | 0 | 0 | 0 | 1 | 0 | 0 | 0 | 0         | 0                | 1       |
| AT1G01935 | 0 | 0 | 0 | 1 | 0 | 0 | 0 | 0         | 0                | 1       |
| AT1G01936 | 0 | 0 | 0 | 1 | 0 | 0 | 0 | 0         | 0                | 1       |
| AT1G01937 | 0 | 0 | 0 | 1 | 0 | 0 | 0 | 0         | 0                | 1       |
| AT1G01938 | 0 | 0 | 0 | 1 | 0 | 0 | 0 | 0         | 0                | 1       |
| AT1G01939 | 0 | 0 | 0 | 1 | 0 | 0 | 0 | 0         | 0                | 1       |
| AT1G01940 | 0 | 0 | 0 | 1 | 0 | 0 | 0 | 0         | 0                | 1       |
| AT1G01941 | 0 | 0 | 0 | 1 | 0 | 0 | 0 | 0         | 0                | 1       |
| AT1G01942 | 0 | 0 | 0 | 1 | 0 | 0 | 0 | 0         | 0                | 1       |
| AT1G01943 | 0 | 0 | 0 | 1 | 0 | 0 | 0 | 0         | 0                | 1       |
| AT1G01944 | 0 | 0 | 0 | 1 | 0 | 0 | 0 | 0         | 0                | 1       |
| AT1G01945 | 0 | 0 | 0 | 1 | 0 | 0 | 0 | 0         | 0                | 1       |
| AT1G01946 | 0 | 0 | 0 | 1 | 0 | 0 | 0 | 0         | 0                | 1       |
| AT1G01947 | 0 | 0 | 0 | 1 | 0 | 0 | 0 | 0         | 0                | 1       |
| AT1G01948 | 0 | 0 | 0 | 1 | 0 | 0 | 0 | 0         | 0                | 1       |
| AT1G01949 | 0 | 0 | 0 | 1 | 0 | 0 | 0 | 0         | 0                | 1       |
| AT1G01950 | 0 | 0 | 0 | 1 | 0 | 0 | 0 | 0         | 0                | 1       |
| AT1G01951 | 0 | 0 | 0 | 1 | 0 | 0 | 0 | 0         | 0                | 1       |
| AT1G01952 | 0 | 0 | 0 | 1 | 0 | 0 | 0 | 0         | 0                | 1       |
| AT1G01953 | 0 | 0 | 0 | 1 | 0 | 0 | 0 | 0         | 0                | 1       |
| AT1G01954 | 0 | 0 | 0 | 1 | 0 | 0 | 0 | 0         | 0                | 1       |
| AT1G01955 | 0 | 0 | 0 | 1 | 0 | 0 | 0 | 0         | 0                | 1       |
| AT1G01956 | 0 | 0 | 0 | 1 | 0 | 0 | 0 | 0         | 0                | 1       |
| AT1G01957 | 0 | 0 | 0 | 1 | 0 | 0 | 0 | 0         | 0                | 1       |
| AT1G01958 | 0 | 0 | 0 | 1 | 0 | 0 | 0 | 0         | 0                | 1       |
| AT1G01959 | 0 | 0 | 0 | 1 | 0 | 0 | 0 | 0         | 0                | 1       |
| AT1G01960 | 0 | 0 | 0 | 1 | 0 | 0 | 0 | 0         | 0                | 1       |
| AT1G01961 | 0 | 0 | 0 | 1 | 0 | 0 | 0 | 0         | 0                | 1       |
| AT1G01962 | 0 | 0 | 0 | 1 | 0 | 0 | 0 | 0         | 0                | 1       |
| AT1G01963 | 0 | 0 | 0 | 1 | 0 | 0 | 0 | 0         | 0                | 1       |
| AT1G01964 | 0 | 0 | 0 | 1 | 0 | 0 | 0 | 0         | 0                | 1       |
| AT1G01965 | 0 | 0 | 0 | 1 | 0 | 0 | 0 | 0         | 0                | 1       |
| AT1G01966 | 0 | 0 | 0 | 1 | 0 | 0 | 0 | 0         | 0                | 1       |
| AT1G01967 | 0 | 0 | 0 | 1 | 0 | 0 | 0 | 0         | 0                | 1       |
| AT1G01968 | 0 | 0 | 0 | 1 | 0 | 0 | 0 | 0         | 0                | 1       |
| AT1G01969 | 0 | 0 | 0 | 1 | 0 | 0 | 0 | 0         | 0                | 1       |
| AT1G01970 | 0 | 0 | 0 | 1 | 0 | 0 | 0 | 0         | 0                | 1       |
| AT1G01971 | 0 | 0 | 0 | 1 | 0 | 0 | 0 | 0         | 0                | 1       |

Appendix Table S2

| Name      | 1 | 2 | 3 | 4 | 5 | 6 | 7 | pif45_Col | pif45bes1D_bes1D | ALL_PIF |
|-----------|---|---|---|---|---|---|---|-----------|------------------|---------|
| AT1G01972 | 0 | 0 | 0 | 1 | 0 | 0 | 0 | 0         | 0                | 1       |
| AT1G01973 | 0 | 0 | 0 | 1 | 0 | 0 | 0 | 0         | 0                | 1       |
| AT1G01974 | 0 | 0 | 0 | 1 | 0 | 0 | 0 | 0         | 0                | 1       |
| AT1G01975 | 0 | 0 | 0 | 1 | 0 | 0 | 0 | 0         | 0                | 1       |
| AT1G01976 | 0 | 0 | 0 | 1 | 0 | 0 | 0 | 0         | 0                | 1       |
| AT1G01977 | 0 | 0 | 0 | 1 | 0 | 0 | 0 | 0         | 0                | 1       |
| AT1G01978 | 0 | 0 | 0 | 1 | 0 | 0 | 0 | 0         | 0                | 1       |
| AT1G01979 | 0 | 0 | 0 | 1 | 0 | 0 | 0 | 0         | 0                | 1       |
| AT1G01980 | 0 | 0 | 0 | 1 | 0 | 0 | 0 | 0         | 0                | 1       |
| AT1G01981 | 0 | 0 | 0 | 1 | 0 | 0 | 0 | 0         | 0                | 1       |
| AT1G01982 | 0 | 0 | 0 | 1 | 0 | 0 | 0 | 0         | 0                | 1       |
| AT1G01983 | 0 | 0 | 0 | 1 | 0 | 0 | 0 | 0         | 0                | 1       |
| AT1G01984 | 0 | 0 | 0 | 1 | 0 | 0 | 0 | 0         | 0                | 1       |
| AT1G01985 | 0 | 0 | 0 | 1 | 0 | 0 | 0 | 0         | 0                | 1       |
| AT1G01986 | 0 | 0 | 0 | 1 | 0 | 0 | 0 | 0         | 0                | 1       |
| AT1G01987 | 0 | 0 | 0 | 1 | 0 | 0 | 0 | 0         | 0                | 1       |
| AT1G01988 | 0 | 0 | 0 | 1 | 0 | 0 | 0 | 0         | 0                | 1       |
| AT1G01989 | 0 | 0 | 0 | 1 | 0 | 0 | 0 | 0         | 0                | 1       |
| AT1G01990 | 0 | 0 | 0 | 1 | 0 | 0 | 0 | 0         | 0                | 1       |
| AT1G01991 | 0 | 0 | 0 | 1 | 0 | 0 | 0 | 0         | 0                | 1       |
| AT1G01992 | 0 | 0 | 0 | 1 | 0 | 0 | 0 | 0         | 0                | 1       |
| AT1G01993 | 0 | 0 | 0 | 1 | 0 | 0 | 0 | 0         | 0                | 1       |
| AT1G01994 | 0 | 0 | 0 | 1 | 0 | 0 | 0 | 0         | 0                | 1       |
| AT1G01995 | 0 | 0 | 0 | 1 | 0 | 0 | 0 | 0         | 0                | 1       |
| AT1G01996 | 0 | 0 | 0 | 1 | 0 | 0 | 0 | 0         | 0                | 1       |
| AT1G01997 | 0 | 0 | 0 | 1 | 0 | 0 | 0 | 0         | 0                | 1       |
| AT1G01998 | 0 | 0 | 0 | 1 | 0 | 0 | 0 | 0         | 0                | 1       |
| AT1G01999 | 0 | 0 | 0 | 1 | 0 | 0 | 0 | 0         | 0                | 1       |
| AT1G02000 | 0 | 0 | 0 | 1 | 0 | 0 | 0 | 0         | 0                | 1       |
| AT1G02001 | 0 | 0 | 0 | 1 | 0 | 0 | 0 | 0         | 0                | 1       |
| AT1G02002 | 0 | 0 | 0 | 1 | 0 | 0 | 0 | 0         | 0                | 1       |
| AT1G02003 | 0 | 0 | 0 | 1 | 0 | 0 | 0 | 0         | 0                | 1       |
| AT1G02004 | 0 | 0 | 0 | 1 | 0 | 0 | 0 | 0         | 0                | 1       |
| AT1G02005 | 0 | 0 | 0 | 1 | 0 | 0 | 0 | 0         | 0                | 1       |
| AT1G02006 | 0 | 0 | 0 | 1 | 0 | 0 | 0 | 0         | 0                | 1       |
| AT1G02007 | 0 | 0 | 0 | 1 | 0 | 0 | 0 | 0         | 0                | 1       |
| AT1G02008 | 0 | 0 | 0 | 1 | 0 | 0 | 0 | 0         | 0                | 1       |
| AT1G02009 | 0 | 0 | 0 | 1 | 0 | 0 | 0 | 0         | 0                | 1       |
| AT1G02010 | 0 | 0 | 0 | 1 | 0 | 0 | 0 | 0         | 0                | 1       |
| AT1G02011 | 0 | 0 | 0 | 1 | 0 | 0 | 0 | 0         | 0                | 1       |
| AT1G02012 | 0 | 0 | 0 | 1 | 0 | 0 | 0 | 0         | 0                | 1       |
| AT1G02013 | 0 | 0 | 0 | 1 | 0 | 0 | 0 | 0         | 0                | 1       |
| AT1G02014 | 0 | 0 | 0 | 1 | 0 | 0 | 0 | 0         | 0                | 1       |
| AT1G02015 | 0 | 0 | 0 | 1 | 0 | 0 | 0 | 0         | 0                | 1       |
| AT1G02016 | 0 | 0 | 0 | 1 | 0 | 0 | 0 | 0         | 0                | 1       |
| AT1G02017 | 0 | 0 | 0 | 1 | 0 | 0 | 0 | 0         | 0                | 1       |
| AT1G02018 | 0 | 0 | 0 | 1 | 0 | 0 | 0 | 0         | 0                | 1       |
| AT1G02019 | 0 | 0 | 0 | 1 | 0 | 0 | 0 | 0         | 0                | 1       |
| AT1G02020 | 0 | 0 | 0 | 1 | 0 | 0 | 0 | 0         | 0                | 1       |
| AT1G02021 | 0 | 0 | 0 | 1 | 0 | 0 | 0 | 0         | 0                | 1       |
| AT1G02022 | 0 | 0 | 0 | 1 | 0 | 0 | 0 | 0         | 0                | 1       |
| AT1G02023 | 0 | 0 | 0 | 1 | 0 | 0 | 0 | 0         | 0                | 1       |
| AT1G02024 | 0 | 0 | 0 | 1 | 0 | 0 | 0 | 0         | 0                | 1       |
| AT1G02025 | 0 | 0 | 0 | 1 | 0 | 0 | 0 | 0         | 0                | 1       |
| AT1G02026 | 0 | 0 | 0 | 1 | 0 | 0 | 0 | 0         | 0                | 1       |
| AT1G02027 | 0 | 0 | 0 | 1 | 0 | 0 | 0 | 0         | 0                | 1       |
| AT1G02028 | 0 | 0 | 0 | 1 | 0 | 0 | 0 | 0         | 0                | 1       |
| AT1G02029 | 0 | 0 | 0 | 1 | 0 | 0 | 0 | 0         | 0                | 1       |
| AT1G02030 | 0 | 0 | 0 | 1 | 0 | 0 | 0 | 0         | 0                | 1       |
| AT1G02031 | 0 | 0 | 0 | 1 | 0 | 0 | 0 | 0         | 0                | 1       |
| AT1G02032 | 0 | 0 | 0 | 1 | 0 | 0 | 0 | 0         | 0                | 1       |

Appendix Table S2

| Name      | 1 | 2 | 3 | 4 | 5 | 6 | 7 | pif45_Col | pif45bes1D_bes1D | ALL_PIF |
|-----------|---|---|---|---|---|---|---|-----------|------------------|---------|
| AT1G02033 | 0 | 0 | 0 | 1 | 0 | 0 | 0 | 0         | 0                | 1       |
| AT1G02034 | 0 | 0 | 0 | 1 | 0 | 0 | 0 | 0         | 0                | 1       |
| AT1G02035 | 0 | 0 | 0 | 1 | 0 | 0 | 0 | 0         | 0                | 1       |
| AT1G02036 | 0 | 0 | 0 | 1 | 0 | 0 | 0 | 0         | 0                | 1       |
| AT1G02037 | 0 | 0 | 0 | 1 | 0 | 0 | 0 | 0         | 0                | 1       |
| AT1G02038 | 0 | 0 | 0 | 1 | 0 | 0 | 0 | 0         | 0                | 1       |
| AT1G02039 | 0 | 0 | 0 | 1 | 0 | 0 | 0 | 0         | 0                | 1       |
| AT1G02040 | 0 | 0 | 0 | 1 | 0 | 0 | 0 | 0         | 0                | 1       |
| AT1G02041 | 0 | 0 | 0 | 1 | 0 | 0 | 0 | 0         | 0                | 1       |
| AT1G02042 | 0 | 0 | 0 | 1 | 0 | 0 | 0 | 0         | 0                | 1       |
| AT1G02043 | 0 | 0 | 0 | 1 | 0 | 0 | 0 | 0         | 0                | 1       |
| AT1G02044 | 0 | 0 | 0 | 1 | 0 | 0 | 0 | 0         | 0                | 1       |
| AT1G02045 | 0 | 0 | 0 | 1 | 0 | 0 | 0 | 0         | 0                | 1       |
| AT1G02046 | 0 | 0 | 0 | 1 | 0 | 0 | 0 | 0         | 0                | 1       |
| AT1G02047 | 0 | 0 | 0 | 1 | 0 | 0 | 0 | 0         | 0                | 1       |
| AT1G02048 | 0 | 0 | 0 | 1 | 0 | 0 | 0 | 0         | 0                | 1       |
| AT1G02049 | 0 | 0 | 0 | 1 | 0 | 0 | 0 | 0         | 0                | 1       |
| AT1G02050 | 0 | 0 | 0 | 1 | 0 | 0 | 0 | 0         | 0                | 1       |
| AT1G02051 | 0 | 0 | 0 | 1 | 0 | 0 | 0 | 0         | 0                | 1       |
| AT1G02052 | 0 | 0 | 0 | 1 | 0 | 0 | 0 | 0         | 0                | 1       |
| AT1G02053 | 0 | 0 | 0 | 1 | 0 | 0 | 0 | 0         | 0                | 1       |
| AT1G02054 | 0 | 0 | 0 | 1 | 0 | 0 | 0 | 0         | 0                | 1       |
| AT1G02055 | 0 | 0 | 0 | 1 | 0 | 0 | 0 | 0         | 0                | 1       |
| AT1G02056 | 0 | 0 | 0 | 1 | 0 | 0 | 0 | 0         | 0                | 1       |
| AT1G02057 | 0 | 0 | 0 | 1 | 0 | 0 | 0 | 0         | 0                | 1       |
| AT1G02058 | 0 | 0 | 0 | 1 | 0 | 0 | 0 | 0         | 0                | 1       |
| AT1G02059 | 0 | 0 | 0 | 1 | 0 | 0 | 0 | 0         | 0                | 1       |
| AT1G02060 | 0 | 0 | 0 | 1 | 0 | 0 | 0 | 0         | 0                | 1       |
| AT1G02061 | 0 | 0 | 0 | 1 | 0 | 0 | 0 | 0         | 0                | 1       |
| AT1G02062 | 0 | 0 | 0 | 1 | 0 | 0 | 0 | 0         | 0                | 1       |
| AT1G02063 | 0 | 0 | 0 | 1 | 0 | 0 | 0 | 0         | 0                | 1       |
| AT1G02064 | 0 | 0 | 0 | 1 | 0 | 0 | 0 | 0         | 0                | 1       |
| AT1G02065 | 0 | 0 | 0 | 1 | 0 | 0 | 0 | 0         | 0                | 1       |
| AT1G02066 | 0 | 0 | 0 | 1 | 0 | 0 | 0 | 0         | 0                | 1       |
| AT1G02067 | 0 | 0 | 0 | 1 | 0 | 0 | 0 | 0         | 0                | 1       |
| AT1G02068 | 0 | 0 | 0 | 1 | 0 | 0 | 0 | 0         | 0                | 1       |
| AT1G02069 | 0 | 0 | 0 | 1 | 0 | 0 | 0 | 0         | 0                | 1       |
| AT1G02070 | 0 | 0 | 0 | 1 | 0 | 0 | 0 | 0         | 0                | 1       |
| AT1G02071 | 0 | 0 | 0 | 1 | 0 | 0 | 0 | 0         | 0                | 1       |
| AT1G02072 | 0 | 0 | 0 | 1 | 0 | 0 | 0 | 0         | 0                | 1       |
| AT1G02073 | 0 | 0 | 0 | 1 | 0 | 0 | 0 | 0         | 0                | 1       |
| AT1G02074 | 0 | 0 | 0 | 1 | 0 | 0 | 0 | 0         | 0                | 1       |
| AT1G02075 | 0 | 0 | 0 | 1 | 0 | 0 | 0 | 0         | 0                | 1       |
| AT1G02076 | 0 | 0 | 0 | 1 | 0 | 0 | 0 | 0         | 0                | 1       |
| AT1G02077 | 0 | 0 | 0 | 1 | 0 | 0 | 0 | 0         | 0                | 1       |
| AT1G02078 | 0 | 0 | 0 | 1 | 0 | 0 | 0 | 0         | 0                | 1       |
| AT1G02079 | 0 | 0 | 0 | 1 | 0 | 0 | 0 | 0         | 0                | 1       |
| AT1G02080 | 0 | 0 | 0 | 1 | 0 | 0 | 0 | 0         | 0                | 1       |
| AT1G02081 | 0 | 0 | 0 | 1 | 0 | 0 | 0 | 0         | 0                | 1       |
| AT1G02082 | 0 | 0 | 0 | 1 | 0 | 0 | 0 | 0         | 0                | 1       |
| AT1G02083 | 0 | 0 | 0 | 1 | 0 | 0 | 0 | 0         | 0                | 1       |
| AT1G02084 | 0 | 0 | 0 | 1 | 0 | 0 | 0 | 0         | 0                | 1       |
| AT1G02085 | 0 | 0 | 0 | 1 | 0 | 0 | 0 | 0         | 0                | 1       |
| AT1G02086 | 0 | 0 | 0 | 1 | 0 | 0 | 0 | 0         | 0                | 1       |
| AT1G02087 | 0 | 0 | 0 | 1 | 0 | 0 | 0 | 0         | 0                | 1       |
| AT1G02088 | 0 | 0 | 0 | 1 | 0 | 0 | 0 | 0         | 0                | 1       |
| AT1G02089 | 0 | 0 | 0 | 1 | 0 | 0 | 0 | 0         | 0                | 1       |
| AT1G02090 | 0 | 0 | 0 | 1 | 0 | 0 | 0 | 0         | 0                | 1       |
| AT1G02091 | 0 | 0 | 0 | 1 | 0 | 0 | 0 | 0         | 0                | 1       |
| AT1G02092 | 0 | 0 | 0 | 1 | 0 | 0 | 0 | 0         | 0                | 1       |
| AT1G02093 | 0 | 0 | 0 | 1 | 0 | 0 | 0 | 0         | 0                | 1       |

Appendix Table S2

| Name      | 1 | 2 | 3 | 4 | 5 | 6 | 7 | pif45_Col | pif45bes1D_bes1D | ALL_PIF |
|-----------|---|---|---|---|---|---|---|-----------|------------------|---------|
| AT1G02094 | 0 | 0 | 0 | 1 | 0 | 0 | 0 | 0         | 0                | 1       |
| AT1G02095 | 0 | 0 | 0 | 1 | 0 | 0 | 0 | 0         | 0                | 1       |
| AT1G02096 | 0 | 0 | 0 | 1 | 0 | 0 | 0 | 0         | 0                | 1       |
| AT1G02097 | 0 | 0 | 0 | 1 | 0 | 0 | 0 | 0         | 0                | 1       |
| AT1G02098 | 0 | 0 | 0 | 1 | 0 | 0 | 0 | 0         | 0                | 1       |
| AT1G02099 | 0 | 0 | 0 | 1 | 0 | 0 | 0 | 0         | 0                | 1       |
| AT1G02100 | 0 | 0 | 0 | 1 | 0 | 0 | 0 | 0         | 0                | 1       |
| AT1G02101 | 0 | 0 | 0 | 1 | 0 | 0 | 0 | 0         | 0                | 1       |
| AT1G02102 | 0 | 0 | 0 | 1 | 0 | 0 | 0 | 0         | 0                | 1       |
| AT1G02103 | 0 | 0 | 0 | 1 | 0 | 0 | 0 | 0         | 0                | 1       |
| AT1G02104 | 0 | 0 | 0 | 1 | 0 | 0 | 0 | 0         | 0                | 1       |
| AT1G02105 | 0 | 0 | 0 | 1 | 0 | 0 | 0 | 0         | 0                | 1       |
| AT1G02106 | 0 | 0 | 0 | 1 | 0 | 0 | 0 | 0         | 0                | 1       |
| AT1G02107 | 0 | 0 | 0 | 1 | 0 | 0 | 0 | 0         | 0                | 1       |
| AT1G02108 | 0 | 0 | 0 | 1 | 0 | 0 | 0 | 0         | 0                | 1       |
| AT1G02109 | 0 | 0 | 0 | 1 | 0 | 0 | 0 | 0         | 0                | 1       |
| AT1G02110 | 0 | 0 | 0 | 1 | 0 | 0 | 0 | 0         | 0                | 1       |
| AT1G02111 | 0 | 0 | 0 | 1 | 0 | 0 | 0 | 0         | 0                | 1       |
| AT1G02112 | 0 | 0 | 0 | 1 | 0 | 0 | 0 | 0         | 0                | 1       |
| AT1G02113 | 0 | 0 | 0 | 1 | 0 | 0 | 0 | 0         | 0                | 1       |
| AT1G02114 | 0 | 0 | 0 | 1 | 0 | 0 | 0 | 0         | 0                | 1       |
| AT1G02115 | 0 | 0 | 0 | 1 | 0 | 0 | 0 | 0         | 0                | 1       |
| AT1G02116 | 0 | 0 | 0 | 1 | 0 | 0 | 0 | 0         | 0                | 1       |
| AT1G02117 | 0 | 0 | 0 | 1 | 0 | 0 | 0 | 0         | 0                | 1       |
| AT1G02118 | 0 | 0 | 0 | 1 | 0 | 0 | 0 | 0         | 0                | 1       |
| AT1G02119 | 0 | 0 | 0 | 1 | 0 | 0 | 0 | 0         | 0                | 1       |
| AT1G02120 | 0 | 0 | 0 | 1 | 0 | 0 | 0 | 0         | 0                | 1       |
| AT1G02121 | 0 | 0 | 0 | 1 | 0 | 0 | 0 | 0         | 0                | 1       |
| AT1G02122 | 0 | 0 | 0 | 1 | 0 | 0 | 0 | 0         | 0                | 1       |
| AT1G02123 | 0 | 0 | 0 | 1 | 0 | 0 | 0 | 0         | 0                | 1       |
| AT1G02124 | 0 | 0 | 0 | 1 | 0 | 0 | 0 | 0         | 0                | 1       |
| AT1G02125 | 0 | 0 | 0 | 1 | 0 | 0 | 0 | 0         | 0                | 1       |
| AT1G02126 | 0 | 0 | 0 | 1 | 0 | 0 | 0 | 0         | 0                | 1       |
| AT1G02127 | 0 | 0 | 0 | 1 | 0 | 0 | 0 | 0         | 0                | 1       |
| AT1G02128 | 0 | 0 | 0 | 1 | 0 | 0 | 0 | 0         | 0                | 1       |
| AT1G02129 | 0 | 0 | 0 | 1 | 0 | 0 | 0 | 0         | 0                | 1       |
| AT1G02130 | 0 | 0 | 0 | 1 | 0 | 0 | 0 | 0         | 0                | 1       |
| AT1G02131 | 0 | 0 | 0 | 1 | 0 | 0 | 0 | 0         | 0                | 1       |
| AT1G02132 | 0 | 0 | 0 | 1 | 0 | 0 | 0 | 0         | 0                | 1       |
| AT1G02133 | 0 | 0 | 0 | 1 | 0 | 0 | 0 | 0         | 0                | 1       |
| AT1G02134 | 0 | 0 | 0 | 1 | 0 | 0 | 0 | 0         | 0                | 1       |
| AT1G02135 | 0 | 0 | 0 | 1 | 0 | 0 | 0 | 0         | 0                | 1       |
| AT1G02136 | 0 | 0 | 0 | 1 | 0 | 0 | 0 | 0         | 0                | 1       |
| AT1G02137 | 0 | 0 | 0 | 1 | 0 | 0 | 0 | 0         | 0                | 1       |
| AT1G02138 | 0 | 0 | 0 | 1 | 0 | 0 | 0 | 0         | 0                | 1       |
| AT1G02139 | 0 | 0 | 0 | 1 | 0 | 0 | 0 | 0         | 0                | 1       |
| AT1G02140 | 0 | 0 | 0 | 1 | 0 | 0 | 0 | 0         | 0                | 1       |
| AT1G02141 | 0 | 0 | 0 | 1 | 0 | 0 | 0 | 0         | 0                | 1       |
| AT1G02142 | 0 | 0 | 0 | 1 | 0 | 0 | 0 | 0         | 0                | 1       |
| AT1G02143 | 0 | 0 | 0 | 1 | 0 | 0 | 0 | 0         | 0                | 1       |
| AT1G02144 | 0 | 0 | 0 | 1 | 0 | 0 | 0 | 0         | 0                | 1       |
| AT1G02145 | 0 | 0 | 0 | 1 | 0 | 0 | 0 | 0         | 0                | 1       |
| AT1G02146 | 0 | 0 | 0 | 1 | 0 | 0 | 0 | 0         | 0                | 1       |
| AT1G02147 | 0 | 0 | 0 | 1 | 0 | 0 | 0 | 0         | 0                | 1       |
| AT1G02148 | 0 | 0 | 0 | 1 | 0 | 0 | 0 | 0         | 0                | 1       |
| AT1G02149 | 0 | 0 | 0 | 1 | 0 | 0 | 0 | 0         | 0                | 1       |
| AT1G02150 | 0 | 0 | 0 | 1 | 0 | 0 | 0 | 0         | 0                | 1       |
| AT1G02151 | 0 | 0 | 0 | 1 | 0 | 0 | 0 | 0         | 0                | 1       |
| AT1G02152 | 0 | 0 | 0 | 1 | 0 | 0 | 0 | 0         | 0                | 1       |
| AT1G02153 | 0 | 0 | 0 | 1 | 0 | 0 | 0 | 0         | 0                | 1       |
| AT1G02154 | 0 | 0 | 0 | 1 | 0 | 0 | 0 | 0         | 0                | 1       |



Appendix Table S2

| Name      | 1 | 2 | 3 | 4 | 5 | 6 | 7 | pif45_Col | pif45bes1D_bes1D | ALL_PIF |
|-----------|---|---|---|---|---|---|---|-----------|------------------|---------|
| AT1G02155 | 0 | 0 | 0 | 1 | 0 | 0 | 0 | 0         | 0                | 1       |
| AT1G02156 | 0 | 0 | 0 | 1 | 0 | 0 | 0 | 0         | 0                | 1       |
| AT1G02157 | 0 | 0 | 0 | 1 | 0 | 0 | 0 | 0         | 0                | 1       |
| AT1G02158 | 0 | 0 | 0 | 1 | 0 | 0 | 0 | 0         | 0                | 1       |
| AT1G02159 | 0 | 0 | 0 | 1 | 0 | 0 | 0 | 0         | 0                | 1       |
| AT1G02160 | 0 | 0 | 0 | 1 | 0 | 0 | 0 | 0         | 0                | 1       |
| AT1G02161 | 0 | 0 | 0 | 1 | 0 | 0 | 0 | 0         | 0                | 1       |
| AT1G02162 | 0 | 0 | 0 | 1 | 0 | 0 | 0 | 0         | 0                | 1       |
| AT1G02163 | 0 | 0 | 0 | 1 | 0 | 0 | 0 | 0         | 0                | 1       |
| AT1G02164 | 0 | 0 | 0 | 1 | 0 | 0 | 0 | 0         | 0                | 1       |
| AT1G02165 | 0 | 0 | 0 | 1 | 0 | 0 | 0 | 0         | 0                | 1       |
| AT1G02166 | 0 | 0 | 0 | 1 | 0 | 0 | 0 | 0         | 0                | 1       |
| AT1G02167 | 0 | 0 | 0 | 1 | 0 | 0 | 0 | 0         | 0                | 1       |
| AT1G02168 | 0 | 0 | 0 | 1 | 0 | 0 | 0 | 0         | 0                | 1       |
| AT1G02169 | 0 | 0 | 0 | 1 | 0 | 0 | 0 | 0         | 0                | 1       |
| AT1G02170 | 0 | 0 | 0 | 1 | 0 | 0 | 0 | 0         | 0                | 1       |
| AT1G02171 | 0 | 0 | 0 | 1 | 0 | 0 | 0 | 0         | 0                | 1       |
| AT1G02172 | 0 | 0 | 0 | 1 | 0 | 0 | 0 | 0         | 0                | 1       |
| AT1G02173 | 0 | 0 | 0 | 1 | 0 | 0 | 0 | 0         | 0                | 1       |
| AT1G02174 | 0 | 0 | 0 | 1 | 0 | 0 | 0 | 0         | 0                | 1       |
| AT1G02175 | 0 | 0 | 0 | 1 | 0 | 0 | 0 | 0         | 0                | 1       |
| AT1G02176 | 0 | 0 | 0 | 1 | 0 | 0 | 0 | 0         | 0                | 1       |
| AT1G02177 | 0 | 0 | 0 | 1 | 0 | 0 | 0 | 0         | 0                | 1       |
| AT1G02178 | 0 | 0 | 0 | 1 | 0 | 0 | 0 | 0         | 0                | 1       |
| AT1G02179 | 0 | 0 | 0 | 1 | 0 | 0 | 0 | 0         | 0                | 1       |
| AT1G02180 | 0 | 0 | 0 | 1 | 0 | 0 | 0 | 0         | 0                | 1       |
| AT1G02181 | 0 | 0 | 0 | 1 | 0 | 0 | 0 | 0         | 0                | 1       |
| AT1G02182 | 0 | 0 | 0 | 1 | 0 | 0 | 0 | 0         | 0                | 1       |
| AT1G02183 | 0 | 0 | 0 | 1 | 0 | 0 | 0 | 0         | 0                | 1       |
| AT1G02184 | 0 | 0 | 0 | 1 | 0 | 0 | 0 | 0         | 0                | 1       |
| AT1G02185 | 0 | 0 | 0 | 1 | 0 | 0 | 0 | 0         | 0                | 1       |
| AT1G02186 | 0 | 0 | 0 | 1 | 0 | 0 | 0 | 0         | 0                | 1       |
| AT1G02187 | 0 | 0 | 0 | 1 | 0 | 0 | 0 | 0         | 0                | 1       |
| AT1G02188 | 0 | 0 | 0 | 1 | 0 | 0 | 0 | 0         | 0                | 1       |
| AT1G02189 | 0 | 0 | 0 | 1 | 0 | 0 | 0 | 0         | 0                | 1       |
| AT1G02190 | 0 | 0 | 0 | 1 | 0 | 0 | 0 | 0         | 0                | 1       |
| AT1G02191 | 0 | 0 | 0 | 1 | 0 | 0 | 0 | 0         | 0                | 1       |
| AT1G02192 | 0 | 0 | 0 | 1 | 0 | 0 | 0 | 0         | 0                | 1       |
| AT1G02193 | 0 | 0 | 0 | 1 | 0 | 0 | 0 | 0         | 0                | 1       |
| AT1G02194 | 0 | 0 | 0 | 1 | 0 | 0 | 0 | 0         | 0                | 1       |
| AT1G02195 | 0 | 0 | 0 | 1 | 0 | 0 | 0 | 0         | 0                | 1       |
| AT1G02196 | 0 | 0 | 0 | 1 | 0 | 0 | 0 | 0         | 0                | 1       |
| AT1G02197 | 0 | 0 | 0 | 1 | 0 | 0 | 0 | 0         | 0                | 1       |
| AT1G02198 | 0 | 0 | 0 | 1 | 0 | 0 | 0 | 0         | 0                | 1       |
| AT1G02199 | 0 | 0 | 0 | 1 | 0 | 0 | 0 | 0         | 0                | 1       |
| AT1G02200 | 0 | 0 | 0 | 1 | 0 | 0 | 0 | 0         | 0                | 1       |
| AT1G02201 | 0 | 0 | 0 | 1 | 0 | 0 | 0 | 0         | 0                | 1       |
| AT1G02202 | 0 | 0 | 0 | 1 | 0 | 0 | 0 | 0         | 0                | 1       |
| AT1G02203 | 0 | 0 | 0 | 1 | 0 | 0 | 0 | 0         | 0                | 1       |
| AT1G02204 | 0 | 0 | 0 | 1 | 0 | 0 | 0 | 0         | 0                | 1       |
| AT1G02205 | 0 | 0 | 0 | 1 | 0 | 0 | 0 | 0         | 0                | 1       |
| AT1G02205 | 0 | 1 | 0 | 1 | 0 | 1 | 1 | 1         | 0                | 1       |
| AT1G02206 | 0 | 0 | 0 | 1 | 0 | 0 | 0 | 0         | 0                | 1       |
| AT1G02207 | 0 | 0 | 0 | 1 | 0 | 0 | 0 | 0         | 0                | 1       |
| AT1G02208 | 0 | 0 | 0 | 1 | 0 | 0 | 0 | 0         | 0                | 1       |
| AT1G02209 | 0 | 0 | 0 | 1 | 0 | 0 | 0 | 0         | 0                | 1       |
| AT1G02210 | 0 | 0 | 0 | 1 | 0 | 0 | 0 | 0         | 0                | 1       |
| AT1G02211 | 0 | 0 | 0 | 1 | 0 | 0 | 0 | 0         | 0                | 1       |
| AT1G02212 | 0 | 0 | 0 | 1 | 0 | 0 | 0 | 0         | 0                | 1       |
| AT1G02213 | 0 | 0 | 0 | 1 | 0 | 0 | 0 | 0         | 0                | 1       |
| AT1G02214 | 0 | 0 | 0 | 1 | 0 | 0 | 0 | 0         | 0                | 1       |

Appendix Table S2

| Name      | 1 | 2 | 3 | 4 | 5 | 6 | 7 | pif45_Col | pif45bes1D_bes1D | ALL_PIF |
|-----------|---|---|---|---|---|---|---|-----------|------------------|---------|
| AT1G02215 | 0 | 0 | 0 | 1 | 0 | 0 | 0 | 0         | 0                | 1       |
| AT1G02216 | 0 | 0 | 0 | 1 | 0 | 0 | 0 | 0         | 0                | 1       |
| AT1G02217 | 0 | 0 | 0 | 1 | 0 | 0 | 0 | 0         | 0                | 1       |
| AT1G02218 | 0 | 0 | 0 | 1 | 0 | 0 | 0 | 0         | 0                | 1       |
| AT1G02219 | 0 | 0 | 0 | 1 | 0 | 0 | 0 | 0         | 0                | 1       |
| AT1G02220 | 0 | 0 | 0 | 1 | 0 | 0 | 0 | 0         | 0                | 1       |
| AT1G02220 | 0 | 0 | 0 | 1 | 0 | 0 | 1 | 0         | 0                | 1       |
| AT1G02221 | 0 | 0 | 0 | 1 | 0 | 0 | 0 | 0         | 0                | 1       |
| AT1G02222 | 0 | 0 | 0 | 1 | 0 | 0 | 0 | 0         | 0                | 1       |
| AT1G02223 | 0 | 0 | 0 | 1 | 0 | 0 | 0 | 0         | 0                | 1       |
| AT1G02224 | 0 | 0 | 0 | 1 | 0 | 0 | 0 | 0         | 0                | 1       |
| AT1G02225 | 0 | 0 | 0 | 1 | 0 | 0 | 0 | 0         | 0                | 1       |
| AT1G02226 | 0 | 0 | 0 | 1 | 0 | 0 | 0 | 0         | 0                | 1       |
| AT1G02227 | 0 | 0 | 0 | 1 | 0 | 0 | 0 | 0         | 0                | 1       |
| AT1G02228 | 0 | 0 | 0 | 1 | 0 | 0 | 0 | 0         | 0                | 1       |
| AT1G02229 | 0 | 0 | 0 | 1 | 0 | 0 | 0 | 0         | 0                | 1       |
| AT1G02230 | 0 | 0 | 0 | 1 | 0 | 0 | 0 | 0         | 0                | 1       |
| AT1G02231 | 0 | 0 | 0 | 1 | 0 | 0 | 0 | 0         | 0                | 1       |
| AT1G02232 | 0 | 0 | 0 | 1 | 0 | 0 | 0 | 0         | 0                | 1       |
| AT1G02233 | 0 | 0 | 0 | 1 | 0 | 0 | 0 | 0         | 0                | 1       |
| AT1G02234 | 0 | 0 | 0 | 1 | 0 | 0 | 0 | 0         | 0                | 1       |
| AT1G02235 | 0 | 0 | 0 | 1 | 0 | 0 | 0 | 0         | 0                | 1       |
| AT1G02236 | 0 | 0 | 0 | 1 | 0 | 0 | 0 | 0         | 0                | 1       |
| AT1G02237 | 0 | 0 | 0 | 1 | 0 | 0 | 0 | 0         | 0                | 1       |
| AT1G02238 | 0 | 0 | 0 | 1 | 0 | 0 | 0 | 0         | 0                | 1       |
| AT1G02239 | 0 | 0 | 0 | 1 | 0 | 0 | 0 | 0         | 0                | 1       |
| AT1G02240 | 0 | 0 | 0 | 1 | 0 | 0 | 0 | 0         | 0                | 1       |
| AT1G02241 | 0 | 0 | 0 | 1 | 0 | 0 | 0 | 0         | 0                | 1       |
| AT1G02242 | 0 | 0 | 0 | 1 | 0 | 0 | 0 | 0         | 0                | 1       |
| AT1G02243 | 0 | 0 | 0 | 1 | 0 | 0 | 0 | 0         | 0                | 1       |
| AT1G02244 | 0 | 0 | 0 | 1 | 0 | 0 | 0 | 0         | 0                | 1       |
| AT1G02245 | 0 | 0 | 0 | 1 | 0 | 0 | 0 | 0         | 0                | 1       |
| AT1G02246 | 0 | 0 | 0 | 1 | 0 | 0 | 0 | 0         | 0                | 1       |
| AT1G02247 | 0 | 0 | 0 | 1 | 0 | 0 | 0 | 0         | 0                | 1       |
| AT1G02248 | 0 | 0 | 0 | 1 | 0 | 0 | 0 | 0         | 0                | 1       |
| AT1G02249 | 0 | 0 | 0 | 1 | 0 | 0 | 0 | 0         | 0                | 1       |
| AT1G02250 | 0 | 0 | 0 | 1 | 0 | 0 | 0 | 0         | 0                | 1       |
| AT1G02251 | 0 | 0 | 0 | 1 | 0 | 0 | 0 | 0         | 0                | 1       |
| AT1G02252 | 0 | 0 | 0 | 1 | 0 | 0 | 0 | 0         | 0                | 1       |
| AT1G02253 | 0 | 0 | 0 | 1 | 0 | 0 | 0 | 0         | 0                | 1       |
| AT1G02254 | 0 | 0 | 0 | 1 | 0 | 0 | 0 | 0         | 0                | 1       |
| AT1G02255 | 0 | 0 | 0 | 1 | 0 | 0 | 0 | 0         | 0                | 1       |
| AT1G02256 | 0 | 0 | 0 | 1 | 0 | 0 | 0 | 0         | 0                | 1       |
| AT1G02257 | 0 | 0 | 0 | 1 | 0 | 0 | 0 | 0         | 0                | 1       |
| AT1G02258 | 0 | 0 | 0 | 1 | 0 | 0 | 0 | 0         | 0                | 1       |
| AT1G02259 | 0 | 0 | 0 | 1 | 0 | 0 | 0 | 0         | 0                | 1       |
| AT1G02260 | 0 | 0 | 0 | 1 | 0 | 0 | 0 | 0         | 0                | 1       |
| AT1G02261 | 0 | 0 | 0 | 1 | 0 | 0 | 0 | 0         | 0                | 1       |
| AT1G02262 | 0 | 0 | 0 | 1 | 0 | 0 | 0 | 0         | 0                | 1       |
| AT1G02263 | 0 | 0 | 0 | 1 | 0 | 0 | 0 | 0         | 0                | 1       |
| AT1G02264 | 0 | 0 | 0 | 1 | 0 | 0 | 0 | 0         | 0                | 1       |
| AT1G02265 | 0 | 0 | 0 | 1 | 0 | 0 | 0 | 0         | 0                | 1       |
| AT1G02266 | 0 | 0 | 0 | 1 | 0 | 0 | 0 | 0         | 0                | 1       |
| AT1G02267 | 0 | 0 | 0 | 1 | 0 | 0 | 0 | 0         | 0                | 1       |
| AT1G02268 | 0 | 0 | 0 | 1 | 0 | 0 | 0 | 0         | 0                | 1       |
| AT1G02269 | 0 | 0 | 0 | 1 | 0 | 0 | 0 | 0         | 0                | 1       |
| AT1G02270 | 0 | 0 | 0 | 1 | 0 | 0 | 0 | 0         | 0                | 1       |
| AT1G02271 | 0 | 0 | 0 | 1 | 0 | 0 | 0 | 0         | 0                | 1       |
| AT1G02272 | 0 | 0 | 0 | 1 | 0 | 0 | 0 | 0         | 0                | 1       |
| AT1G02273 | 0 | 0 | 0 | 1 | 0 | 0 | 0 | 0         | 0                | 1       |
| AT1G02274 | 0 | 0 | 0 | 1 | 0 | 0 | 0 | 0         | 0                | 1       |

Appendix Table S2

| Name      | 1 | 2 | 3 | 4 | 5 | 6 | 7  | pif45_Col | pif45bes1D_bes1D | ALL_PIF |
|-----------|---|---|---|---|---|---|----|-----------|------------------|---------|
| AT1G02275 | 0 | 0 | 0 | 1 | 0 | 0 | 0  | 0         | 0                | 1       |
| AT1G02276 | 0 | 0 | 0 | 1 | 0 | 0 | 0  | 0         | 0                | 1       |
| AT1G02277 | 0 | 0 | 0 | 1 | 0 | 0 | 0  | 0         | 0                | 1       |
| AT1G02278 | 0 | 0 | 0 | 1 | 0 | 0 | 0  | 0         | 0                | 1       |
| AT1G02279 | 0 | 0 | 0 | 1 | 0 | 0 | 0  | 0         | 0                | 1       |
| AT1G02280 | 0 | 0 | 0 | 1 | 0 | 0 | 0  | 0         | 0                | 1       |
| AT1G02281 | 0 | 0 | 0 | 1 | 0 | 0 | 0  | 0         | 0                | 1       |
| AT1G02282 | 0 | 0 | 0 | 1 | 0 | 0 | 0  | 0         | 0                | 1       |
| AT1G02283 | 0 | 0 | 0 | 1 | 0 | 0 | 0  | 0         | 0                | 1       |
| AT1G02284 | 0 | 0 | 0 | 1 | 0 | 0 | 0  | 0         | 0                | 1       |
| AT1G02285 | 0 | 0 | 0 | 1 | 0 | 0 | 0  | 0         | 0                | 1       |
| AT1G02286 | 0 | 0 | 0 | 1 | 0 | 0 | 0  | 0         | 0                | 1       |
| AT1G02287 | 0 | 0 | 0 | 1 | 0 | 0 | 0  | 0         | 0                | 1       |
| AT1G02288 | 0 | 0 | 0 | 1 | 0 | 0 | 0  | 0         | 0                | 1       |
| AT1G02289 | 0 | 0 | 0 | 1 | 0 | 0 | 0  | 0         | 0                | 1       |
| AT1G02290 | 0 | 0 | 0 | 1 | 0 | 0 | 0  | 0         | 0                | 1       |
| AT1G02291 | 0 | 0 | 0 | 1 | 0 | 0 | 0  | 0         | 0                | 1       |
| AT1G02292 | 0 | 0 | 0 | 1 | 0 | 0 | 0  | 0         | 0                | 1       |
| AT1G02293 | 0 | 0 | 0 | 1 | 0 | 0 | 0  | 0         | 0                | 1       |
| AT1G02294 | 0 | 0 | 0 | 1 | 0 | 0 | 0  | 0         | 0                | 1       |
| AT1G02295 | 0 | 0 | 0 | 1 | 0 | 0 | 0  | 0         | 0                | 1       |
| AT1G02296 | 0 | 0 | 0 | 1 | 0 | 0 | 0  | 0         | 0                | 1       |
| AT1G02297 | 0 | 0 | 0 | 1 | 0 | 0 | 0  | 0         | 0                | 1       |
| AT1G02298 | 0 | 0 | 0 | 1 | 0 | 0 | 0  | 0         | 0                | 1       |
| AT1G02299 | 0 | 0 | 0 | 1 | 0 | 0 | 0  | 0         | 0                | 1       |
| AT1G02300 | 0 | 0 | 0 | 0 | 0 | 0 | -1 | 0         | 0                | -1      |
| AT1G02300 | 0 | 0 | 0 | 1 | 0 | 0 | 0  | 0         | 0                | 1       |
| AT1G02301 | 0 | 0 | 0 | 1 | 0 | 0 | 0  | 0         | 0                | 1       |
| AT1G02302 | 0 | 0 | 0 | 1 | 0 | 0 | 0  | 0         | 0                | 1       |
| AT1G02303 | 0 | 0 | 0 | 1 | 0 | 0 | 0  | 0         | 0                | 1       |
| AT1G02304 | 0 | 0 | 0 | 1 | 0 | 0 | 0  | 0         | 0                | 1       |
| AT1G02305 | 0 | 0 | 0 | 1 | 0 | 0 | 0  | 0         | 0                | 1       |
| AT1G02306 | 0 | 0 | 0 | 1 | 0 | 0 | 0  | 0         | 0                | 1       |
| AT1G02307 | 0 | 0 | 0 | 1 | 0 | 0 | 0  | 0         | 0                | 1       |
| AT1G02308 | 0 | 0 | 0 | 1 | 0 | 0 | 0  | 0         | 0                | 1       |
| AT1G02309 | 0 | 0 | 0 | 1 | 0 | 0 | 0  | 0         | 0                | 1       |
| AT1G02310 | 0 | 0 | 0 | 1 | 0 | 0 | 0  | 0         | 0                | 1       |
| AT1G02311 | 0 | 0 | 0 | 1 | 0 | 0 | 0  | 0         | 0                | 1       |
| AT1G02312 | 0 | 0 | 0 | 1 | 0 | 0 | 0  | 0         | 0                | 1       |
| AT1G02313 | 0 | 0 | 0 | 1 | 0 | 0 | 0  | 0         | 0                | 1       |
| AT1G02314 | 0 | 0 | 0 | 1 | 0 | 0 | 0  | 0         | 0                | 1       |
| AT1G02315 | 0 | 0 | 0 | 1 | 0 | 0 | 0  | 0         | 0                | 1       |
| AT1G02316 | 0 | 0 | 0 | 1 | 0 | 0 | 0  | 0         | 0                | 1       |
| AT1G02317 | 0 | 0 | 0 | 1 | 0 | 0 | 0  | 0         | 0                | 1       |
| AT1G02318 | 0 | 0 | 0 | 1 | 0 | 0 | 0  | 0         | 0                | 1       |
| AT1G02319 | 0 | 0 | 0 | 1 | 0 | 0 | 0  | 0         | 0                | 1       |
| AT1G02320 | 0 | 0 | 0 | 1 | 0 | 0 | 0  | 0         | 0                | 1       |
| AT1G02321 | 0 | 0 | 0 | 1 | 0 | 0 | 0  | 0         | 0                | 1       |
| AT1G02322 | 0 | 0 | 0 | 1 | 0 | 0 | 0  | 0         | 0                | 1       |
| AT1G02323 | 0 | 0 | 0 | 1 | 0 | 0 | 0  | 0         | 0                | 1       |
| AT1G02324 | 0 | 0 | 0 | 1 | 0 | 0 | 0  | 0         | 0                | 1       |
| AT1G02325 | 0 | 0 | 0 | 1 | 0 | 0 | 0  | 0         | 0                | 1       |
| AT1G02326 | 0 | 0 | 0 | 1 | 0 | 0 | 0  | 0         | 0                | 1       |
| AT1G02327 | 0 | 0 | 0 | 1 | 0 | 0 | 0  | 0         | 0                | 1       |
| AT1G02328 | 0 | 0 | 0 | 1 | 0 | 0 | 0  | 0         | 0                | 1       |
| AT1G02329 | 0 | 0 | 0 | 1 | 0 | 0 | 0  | 0         | 0                | 1       |
| AT1G02330 | 0 | 0 | 0 | 1 | 0 | 0 | 0  | 0         | 0                | 1       |
| AT1G02331 | 0 | 0 | 0 | 1 | 0 | 0 | 0  | 0         | 0                | 1       |
| AT1G02332 | 0 | 0 | 0 | 1 | 0 | 0 | 0  | 0         | 0                | 1       |
| AT1G02333 | 0 | 0 | 0 | 1 | 0 | 0 | 0  | 0         | 0                | 1       |
| AT1G02334 | 0 | 0 | 0 | 1 | 0 | 0 | 0  | 0         | 0                | 1       |

Appendix Table S2

| Name      | 1 | 2 | 3 | 4 | 5 | 6 | 7 | pif45_Col | pif45bes1D_bes1D | ALL_PIF |
|-----------|---|---|---|---|---|---|---|-----------|------------------|---------|
| AT1G02335 | 0 | 0 | 0 | 1 | 0 | 0 | 0 | 0         | 0                | 1       |
| AT1G02336 | 0 | 0 | 0 | 1 | 0 | 0 | 0 | 0         | 0                | 1       |
| AT1G02337 | 0 | 0 | 0 | 1 | 0 | 0 | 0 | 0         | 0                | 1       |
| AT1G02338 | 0 | 0 | 0 | 1 | 0 | 0 | 0 | 0         | 0                | 1       |
| AT1G02339 | 0 | 0 | 0 | 1 | 0 | 0 | 0 | 0         | 0                | 1       |
| AT1G02340 | 0 | 0 | 0 | 1 | 0 | 0 | 0 | 0         | 0                | 1       |
| AT1G02340 | 1 | 1 | 1 | 1 | 1 | 1 | 1 | 0         | 0                | 1       |
| AT1G02341 | 0 | 0 | 0 | 1 | 0 | 0 | 0 | 0         | 0                | 1       |
| AT1G02342 | 0 | 0 | 0 | 1 | 0 | 0 | 0 | 0         | 0                | 1       |
| AT1G02343 | 0 | 0 | 0 | 1 | 0 | 0 | 0 | 0         | 0                | 1       |
| AT1G02344 | 0 | 0 | 0 | 1 | 0 | 0 | 0 | 0         | 0                | 1       |
| AT1G02345 | 0 | 0 | 0 | 1 | 0 | 0 | 0 | 0         | 0                | 1       |
| AT1G02346 | 0 | 0 | 0 | 1 | 0 | 0 | 0 | 0         | 0                | 1       |
| AT1G02347 | 0 | 0 | 0 | 1 | 0 | 0 | 0 | 0         | 0                | 1       |
| AT1G02348 | 0 | 0 | 0 | 1 | 0 | 0 | 0 | 0         | 0                | 1       |
| AT1G02349 | 0 | 0 | 0 | 1 | 0 | 0 | 0 | 0         | 0                | 1       |
| AT1G02350 | 0 | 0 | 0 | 1 | 0 | 0 | 0 | 0         | 0                | 1       |
| AT1G02351 | 0 | 0 | 0 | 1 | 0 | 0 | 0 | 0         | 0                | 1       |
| AT1G02352 | 0 | 0 | 0 | 1 | 0 | 0 | 0 | 0         | 0                | 1       |
| AT1G02353 | 0 | 0 | 0 | 1 | 0 | 0 | 0 | 0         | 0                | 1       |
| AT1G02354 | 0 | 0 | 0 | 1 | 0 | 0 | 0 | 0         | 0                | 1       |
| AT1G02355 | 0 | 0 | 0 | 1 | 0 | 0 | 0 | 0         | 0                | 1       |
| AT1G02356 | 0 | 0 | 0 | 1 | 0 | 0 | 0 | 0         | 0                | 1       |
| AT1G02357 | 0 | 0 | 0 | 1 | 0 | 0 | 0 | 0         | 0                | 1       |
| AT1G02358 | 0 | 0 | 0 | 1 | 0 | 0 | 0 | 0         | 0                | 1       |
| AT1G02359 | 0 | 0 | 0 | 1 | 0 | 0 | 0 | 0         | 0                | 1       |
| AT1G02360 | 0 | 0 | 0 | 1 | 0 | 0 | 0 | 0         | 0                | 1       |
| AT1G02361 | 0 | 0 | 0 | 1 | 0 | 0 | 0 | 0         | 0                | 1       |
| AT1G02362 | 0 | 0 | 0 | 1 | 0 | 0 | 0 | 0         | 0                | 1       |
| AT1G02363 | 0 | 0 | 0 | 1 | 0 | 0 | 0 | 0         | 0                | 1       |
| AT1G02364 | 0 | 0 | 0 | 1 | 0 | 0 | 0 | 0         | 0                | 1       |
| AT1G02365 | 0 | 0 | 0 | 1 | 0 | 0 | 0 | 0         | 0                | 1       |
| AT1G02366 | 0 | 0 | 0 | 1 | 0 | 0 | 0 | 0         | 0                | 1       |
| AT1G02367 | 0 | 0 | 0 | 1 | 0 | 0 | 0 | 0         | 0                | 1       |
| AT1G02368 | 0 | 0 | 0 | 1 | 0 | 0 | 0 | 0         | 0                | 1       |
| AT1G02369 | 0 | 0 | 0 | 1 | 0 | 0 | 0 | 0         | 0                | 1       |
| AT1G02370 | 0 | 0 | 0 | 1 | 0 | 0 | 0 | 0         | 0                | 1       |
| AT1G02371 | 0 | 0 | 0 | 1 | 0 | 0 | 0 | 0         | 0                | 1       |
| AT1G02372 | 0 | 0 | 0 | 1 | 0 | 0 | 0 | 0         | 0                | 1       |
| AT1G02373 | 0 | 0 | 0 | 1 | 0 | 0 | 0 | 0         | 0                | 1       |
| AT1G02374 | 0 | 0 | 0 | 1 | 0 | 0 | 0 | 0         | 0                | 1       |
| AT1G02375 | 0 | 0 | 0 | 1 | 0 | 0 | 0 | 0         | 0                | 1       |
| AT1G02376 | 0 | 0 | 0 | 1 | 0 | 0 | 0 | 0         | 0                | 1       |
| AT1G02377 | 0 | 0 | 0 | 1 | 0 | 0 | 0 | 0         | 0                | 1       |
| AT1G02378 | 0 | 0 | 0 | 1 | 0 | 0 | 0 | 0         | 0                | 1       |
| AT1G02379 | 0 | 0 | 0 | 1 | 0 | 0 | 0 | 0         | 0                | 1       |
| AT1G02380 | 0 | 0 | 0 | 1 | 0 | 0 | 0 | 0         | 0                | 1       |
| AT1G02381 | 0 | 0 | 0 | 1 | 0 | 0 | 0 | 0         | 0                | 1       |
| AT1G02382 | 0 | 0 | 0 | 1 | 0 | 0 | 0 | 0         | 0                | 1       |
| AT1G02383 | 0 | 0 | 0 | 1 | 0 | 0 | 0 | 0         | 0                | 1       |
| AT1G02384 | 0 | 0 | 0 | 1 | 0 | 0 | 0 | 0         | 0                | 1       |
| AT1G02385 | 0 | 0 | 0 | 1 | 0 | 0 | 0 | 0         | 0                | 1       |
| AT1G02386 | 0 | 0 | 0 | 1 | 0 | 0 | 0 | 0         | 0                | 1       |
| AT1G02387 | 0 | 0 | 0 | 1 | 0 | 0 | 0 | 0         | 0                | 1       |
| AT1G02388 | 0 | 0 | 0 | 1 | 0 | 0 | 0 | 0         | 0                | 1       |
| AT1G02389 | 0 | 0 | 0 | 1 | 0 | 0 | 0 | 0         | 0                | 1       |
| AT1G02390 | 0 | 0 | 0 | 1 | 0 | 0 | 0 | 0         | 0                | 1       |
| AT1G02391 | 0 | 0 | 0 | 1 | 0 | 0 | 0 | 0         | 0                | 1       |
| AT1G02392 | 0 | 0 | 0 | 1 | 0 | 0 | 0 | 0         | 0                | 1       |
| AT1G02393 | 0 | 0 | 0 | 1 | 0 | 0 | 0 | 0         | 0                | 1       |
| AT1G02394 | 0 | 0 | 0 | 1 | 0 | 0 | 0 | 0         | 0                | 1       |

Appendix Table S2

| Name      | 1 | 2 | 3 | 4 | 5 | 6 | 7 | pif45_Col | pif45bes1D_bes1D | ALL_PIF |
|-----------|---|---|---|---|---|---|---|-----------|------------------|---------|
| AT1G02395 | 0 | 0 | 0 | 1 | 0 | 0 | 0 | 0         | 0                | 1       |
| AT1G02396 | 0 | 0 | 0 | 1 | 0 | 0 | 0 | 0         | 0                | 1       |
| AT1G02397 | 0 | 0 | 0 | 1 | 0 | 0 | 0 | 0         | 0                | 1       |
| AT1G02398 | 0 | 0 | 0 | 1 | 0 | 0 | 0 | 0         | 0                | 1       |
| AT1G02399 | 0 | 0 | 0 | 1 | 0 | 0 | 0 | 0         | 0                | 1       |
| AT1G02400 | 0 | 0 | 0 | 1 | 0 | 0 | 0 | 0         | 0                | 1       |
| AT1G02400 | 0 | 1 | 1 | 1 | 0 | 0 | 0 | 0         | 0                | 1       |
| AT1G02401 | 0 | 0 | 0 | 1 | 0 | 0 | 0 | 0         | 0                | 1       |
| AT1G02402 | 0 | 0 | 0 | 1 | 0 | 0 | 0 | 0         | 0                | 1       |
| AT1G02403 | 0 | 0 | 0 | 1 | 0 | 0 | 0 | 0         | 0                | 1       |
| AT1G02404 | 0 | 0 | 0 | 1 | 0 | 0 | 0 | 0         | 0                | 1       |
| AT1G02405 | 0 | 0 | 0 | 1 | 0 | 0 | 0 | 0         | 0                | 1       |
| AT1G02406 | 0 | 0 | 0 | 1 | 0 | 0 | 0 | 0         | 0                | 1       |
| AT1G02407 | 0 | 0 | 0 | 1 | 0 | 0 | 0 | 0         | 0                | 1       |
| AT1G02408 | 0 | 0 | 0 | 1 | 0 | 0 | 0 | 0         | 0                | 1       |
| AT1G02409 | 0 | 0 | 0 | 1 | 0 | 0 | 0 | 0         | 0                | 1       |
| AT1G02410 | 0 | 0 | 0 | 1 | 0 | 0 | 0 | 0         | 0                | 1       |
| AT1G02411 | 0 | 0 | 0 | 1 | 0 | 0 | 0 | 0         | 0                | 1       |
| AT1G02412 | 0 | 0 | 0 | 1 | 0 | 0 | 0 | 0         | 0                | 1       |
| AT1G02413 | 0 | 0 | 0 | 1 | 0 | 0 | 0 | 0         | 0                | 1       |
| AT1G02414 | 0 | 0 | 0 | 1 | 0 | 0 | 0 | 0         | 0                | 1       |
| AT1G02415 | 0 | 0 | 0 | 1 | 0 | 0 | 0 | 0         | 0                | 1       |
| AT1G02416 | 0 | 0 | 0 | 1 | 0 | 0 | 0 | 0         | 0                | 1       |
| AT1G02417 | 0 | 0 | 0 | 1 | 0 | 0 | 0 | 0         | 0                | 1       |
| AT1G02418 | 0 | 0 | 0 | 1 | 0 | 0 | 0 | 0         | 0                | 1       |
| AT1G02419 | 0 | 0 | 0 | 1 | 0 | 0 | 0 | 0         | 0                | 1       |
| AT1G02420 | 0 | 0 | 0 | 1 | 0 | 0 | 0 | 0         | 0                | 1       |
| AT1G02421 | 0 | 0 | 0 | 1 | 0 | 0 | 0 | 0         | 0                | 1       |
| AT1G02422 | 0 | 0 | 0 | 1 | 0 | 0 | 0 | 0         | 0                | 1       |
| AT1G02423 | 0 | 0 | 0 | 1 | 0 | 0 | 0 | 0         | 0                | 1       |
| AT1G02424 | 0 | 0 | 0 | 1 | 0 | 0 | 0 | 0         | 0                | 1       |
| AT1G02425 | 0 | 0 | 0 | 1 | 0 | 0 | 0 | 0         | 0                | 1       |
| AT1G02426 | 0 | 0 | 0 | 1 | 0 | 0 | 0 | 0         | 0                | 1       |
| AT1G02427 | 0 | 0 | 0 | 1 | 0 | 0 | 0 | 0         | 0                | 1       |
| AT1G02428 | 0 | 0 | 0 | 1 | 0 | 0 | 0 | 0         | 0                | 1       |
| AT1G02429 | 0 | 0 | 0 | 1 | 0 | 0 | 0 | 0         | 0                | 1       |
| AT1G02430 | 0 | 0 | 0 | 1 | 0 | 0 | 0 | 0         | 0                | 1       |
| AT1G02431 | 0 | 0 | 0 | 1 | 0 | 0 | 0 | 0         | 0                | 1       |
| AT1G02432 | 0 | 0 | 0 | 1 | 0 | 0 | 0 | 0         | 0                | 1       |
| AT1G02433 | 0 | 0 | 0 | 1 | 0 | 0 | 0 | 0         | 0                | 1       |
| AT1G02434 | 0 | 0 | 0 | 1 | 0 | 0 | 0 | 0         | 0                | 1       |
| AT1G02435 | 0 | 0 | 0 | 1 | 0 | 0 | 0 | 0         | 0                | 1       |
| AT1G02436 | 0 | 0 | 0 | 1 | 0 | 0 | 0 | 0         | 0                | 1       |
| AT1G02437 | 0 | 0 | 0 | 1 | 0 | 0 | 0 | 0         | 0                | 1       |
| AT1G02438 | 0 | 0 | 0 | 1 | 0 | 0 | 0 | 0         | 0                | 1       |
| AT1G02439 | 0 | 0 | 0 | 1 | 0 | 0 | 0 | 0         | 0                | 1       |
| AT1G02440 | 0 | 0 | 0 | 1 | 0 | 0 | 0 | 0         | 0                | 1       |
| AT1G02441 | 0 | 0 | 0 | 1 | 0 | 0 | 0 | 0         | 0                | 1       |
| AT1G02442 | 0 | 0 | 0 | 1 | 0 | 0 | 0 | 0         | 0                | 1       |
| AT1G02443 | 0 | 0 | 0 | 1 | 0 | 0 | 0 | 0         | 0                | 1       |
| AT1G02444 | 0 | 0 | 0 | 1 | 0 | 0 | 0 | 0         | 0                | 1       |
| AT1G02445 | 0 | 0 | 0 | 1 | 0 | 0 | 0 | 0         | 0                | 1       |
| AT1G02446 | 0 | 0 | 0 | 1 | 0 | 0 | 0 | 0         | 0                | 1       |
| AT1G02447 | 0 | 0 | 0 | 1 | 0 | 0 | 0 | 0         | 0                | 1       |
| AT1G02448 | 0 | 0 | 0 | 1 | 0 | 0 | 0 | 0         | 0                | 1       |
| AT1G02449 | 0 | 0 | 0 | 1 | 0 | 0 | 0 | 0         | 0                | 1       |
| AT1G02450 | 0 | 0 | 0 | 1 | 0 | 0 | 0 | 0         | 0                | 1       |
| AT1G02451 | 0 | 0 | 0 | 1 | 0 | 0 | 0 | 0         | 0                | 1       |
| AT1G02452 | 0 | 0 | 0 | 1 | 0 | 0 | 0 | 0         | 0                | 1       |
| AT1G02453 | 0 | 0 | 0 | 1 | 0 | 0 | 0 | 0         | 0                | 1       |
| AT1G02454 | 0 | 0 | 0 | 1 | 0 | 0 | 0 | 0         | 0                | 1       |

Appendix Table S2

| Name      | 1 | 2 | 3 | 4 | 5 | 6 | 7 | pif45_Col | pif45bes1D_bes1D | ALL_PIF |
|-----------|---|---|---|---|---|---|---|-----------|------------------|---------|
| AT1G02455 | 0 | 0 | 0 | 1 | 0 | 0 | 0 | 0         | 0                | 1       |
| AT1G02456 | 0 | 0 | 0 | 1 | 0 | 0 | 0 | 0         | 0                | 1       |
| AT1G02457 | 0 | 0 | 0 | 1 | 0 | 0 | 0 | 0         | 0                | 1       |
| AT1G02458 | 0 | 0 | 0 | 1 | 0 | 0 | 0 | 0         | 0                | 1       |
| AT1G02459 | 0 | 0 | 0 | 1 | 0 | 0 | 0 | 0         | 0                | 1       |
| AT1G02460 | 0 | 0 | 0 | 1 | 0 | 0 | 0 | 0         | 0                | 1       |
| AT1G02461 | 0 | 0 | 0 | 1 | 0 | 0 | 0 | 0         | 0                | 1       |
| AT1G02462 | 0 | 0 | 0 | 1 | 0 | 0 | 0 | 0         | 0                | 1       |
| AT1G02463 | 0 | 0 | 0 | 1 | 0 | 0 | 0 | 0         | 0                | 1       |
| AT1G02464 | 0 | 0 | 0 | 1 | 0 | 0 | 0 | 0         | 0                | 1       |
| AT1G02465 | 0 | 0 | 0 | 1 | 0 | 0 | 0 | 0         | 0                | 1       |
| AT1G02466 | 0 | 0 | 0 | 1 | 0 | 0 | 0 | 0         | 0                | 1       |
| AT1G02467 | 0 | 0 | 0 | 1 | 0 | 0 | 0 | 0         | 0                | 1       |
| AT1G02468 | 0 | 0 | 0 | 1 | 0 | 0 | 0 | 0         | 0                | 1       |
| AT1G02469 | 0 | 0 | 0 | 1 | 0 | 0 | 0 | 0         | 0                | 1       |
| AT1G02470 | 0 | 0 | 0 | 1 | 0 | 0 | 0 | 0         | 0                | 1       |
| AT1G02471 | 0 | 0 | 0 | 1 | 0 | 0 | 0 | 0         | 0                | 1       |
| AT1G02472 | 0 | 0 | 0 | 1 | 0 | 0 | 0 | 0         | 0                | 1       |
| AT1G02473 | 0 | 0 | 0 | 1 | 0 | 0 | 0 | 0         | 0                | 1       |
| AT1G02474 | 0 | 0 | 0 | 1 | 0 | 0 | 0 | 0         | 0                | 1       |
| AT1G02475 | 0 | 0 | 0 | 1 | 0 | 0 | 0 | 0         | 0                | 1       |
| AT1G02476 | 0 | 0 | 0 | 1 | 0 | 0 | 0 | 0         | 0                | 1       |
| AT1G02477 | 0 | 0 | 0 | 1 | 0 | 0 | 0 | 0         | 0                | 1       |
| AT1G02478 | 0 | 0 | 0 | 1 | 0 | 0 | 0 | 0         | 0                | 1       |
| AT1G02479 | 0 | 0 | 0 | 1 | 0 | 0 | 0 | 0         | 0                | 1       |
| AT1G02480 | 0 | 0 | 0 | 1 | 0 | 0 | 0 | 0         | 0                | 1       |
| AT1G02481 | 0 | 0 | 0 | 1 | 0 | 0 | 0 | 0         | 0                | 1       |
| AT1G02482 | 0 | 0 | 0 | 1 | 0 | 0 | 0 | 0         | 0                | 1       |
| AT1G02483 | 0 | 0 | 0 | 1 | 0 | 0 | 0 | 0         | 0                | 1       |
| AT1G02484 | 0 | 0 | 0 | 1 | 0 | 0 | 0 | 0         | 0                | 1       |
| AT1G02485 | 0 | 0 | 0 | 1 | 0 | 0 | 0 | 0         | 0                | 1       |
| AT1G02486 | 0 | 0 | 0 | 1 | 0 | 0 | 0 | 0         | 0                | 1       |
| AT1G02487 | 0 | 0 | 0 | 1 | 0 | 0 | 0 | 0         | 0                | 1       |
| AT1G02488 | 0 | 0 | 0 | 1 | 0 | 0 | 0 | 0         | 0                | 1       |
| AT1G02489 | 0 | 0 | 0 | 1 | 0 | 0 | 0 | 0         | 0                | 1       |
| AT1G02490 | 0 | 0 | 0 | 1 | 0 | 0 | 0 | 0         | 0                | 1       |
| AT1G02491 | 0 | 0 | 0 | 1 | 0 | 0 | 0 | 0         | 0                | 1       |
| AT1G02492 | 0 | 0 | 0 | 1 | 0 | 0 | 0 | 0         | 0                | 1       |
| AT1G02493 | 0 | 0 | 0 | 1 | 0 | 0 | 0 | 0         | 0                | 1       |
| AT1G02494 | 0 | 0 | 0 | 1 | 0 | 0 | 0 | 0         | 0                | 1       |
| AT1G02495 | 0 | 0 | 0 | 1 | 0 | 0 | 0 | 0         | 0                | 1       |
| AT1G02496 | 0 | 0 | 0 | 1 | 0 | 0 | 0 | 0         | 0                | 1       |
| AT1G02497 | 0 | 0 | 0 | 1 | 0 | 0 | 0 | 0         | 0                | 1       |
| AT1G02498 | 0 | 0 | 0 | 1 | 0 | 0 | 0 | 0         | 0                | 1       |
| AT1G02499 | 0 | 0 | 0 | 1 | 0 | 0 | 0 | 0         | 0                | 1       |
| AT1G02500 | 0 | 0 | 0 | 1 | 0 | 0 | 0 | 0         | 0                | 1       |
| AT1G02501 | 0 | 0 | 0 | 1 | 0 | 0 | 0 | 0         | 0                | 1       |
| AT1G02502 | 0 | 0 | 0 | 1 | 0 | 0 | 0 | 0         | 0                | 1       |
| AT1G02503 | 0 | 0 | 0 | 1 | 0 | 0 | 0 | 0         | 0                | 1       |
| AT1G02504 | 0 | 0 | 0 | 1 | 0 | 0 | 0 | 0         | 0                | 1       |
| AT1G02505 | 0 | 0 | 0 | 1 | 0 | 0 | 0 | 0         | 0                | 1       |
| AT1G02506 | 0 | 0 | 0 | 1 | 0 | 0 | 0 | 0         | 0                | 1       |
| AT1G02507 | 0 | 0 | 0 | 1 | 0 | 0 | 0 | 0         | 0                | 1       |
| AT1G02508 | 0 | 0 | 0 | 1 | 0 | 0 | 0 | 0         | 0                | 1       |
| AT1G02509 | 0 | 0 | 0 | 1 | 0 | 0 | 0 | 0         | 0                | 1       |
| AT1G02510 | 0 | 0 | 0 | 1 | 0 | 0 | 0 | 0         | 0                | 1       |
| AT1G02511 | 0 | 0 | 0 | 1 | 0 | 0 | 0 | 0         | 0                | 1       |
| AT1G02512 | 0 | 0 | 0 | 1 | 0 | 0 | 0 | 0         | 0                | 1       |
| AT1G02513 | 0 | 0 | 0 | 1 | 0 | 0 | 0 | 0         | 0                | 1       |
| AT1G02514 | 0 | 0 | 0 | 1 | 0 | 0 | 0 | 0         | 0                | 1       |
| AT1G02515 | 0 | 0 | 0 | 1 | 0 | 0 | 0 | 0         | 0                | 1       |

Appendix Table S2

| Name      | 1 | 2 | 3 | 4 | 5 | 6 | 7 | pif45_Col | pif45bes1D_bes1D | ALL_PIF |
|-----------|---|---|---|---|---|---|---|-----------|------------------|---------|
| AT1G02516 | 0 | 0 | 0 | 1 | 0 | 0 | 0 | 0         | 0                | 1       |
| AT1G02517 | 0 | 0 | 0 | 1 | 0 | 0 | 0 | 0         | 0                | 1       |
| AT1G02518 | 0 | 0 | 0 | 1 | 0 | 0 | 0 | 0         | 0                | 1       |
| AT1G02519 | 0 | 0 | 0 | 1 | 0 | 0 | 0 | 0         | 0                | 1       |
| AT1G02520 | 0 | 0 | 0 | 1 | 0 | 0 | 0 | 0         | 0                | 1       |
| AT1G02521 | 0 | 0 | 0 | 1 | 0 | 0 | 0 | 0         | 0                | 1       |
| AT1G02522 | 0 | 0 | 0 | 1 | 0 | 0 | 0 | 0         | 0                | 1       |
| AT1G02523 | 0 | 0 | 0 | 1 | 0 | 0 | 0 | 0         | 0                | 1       |
| AT1G02524 | 0 | 0 | 0 | 1 | 0 | 0 | 0 | 0         | 0                | 1       |
| AT1G02525 | 0 | 0 | 0 | 1 | 0 | 0 | 0 | 0         | 0                | 1       |
| AT1G02526 | 0 | 0 | 0 | 1 | 0 | 0 | 0 | 0         | 0                | 1       |
| AT1G02527 | 0 | 0 | 0 | 1 | 0 | 0 | 0 | 0         | 0                | 1       |
| AT1G02528 | 0 | 0 | 0 | 1 | 0 | 0 | 0 | 0         | 0                | 1       |
| AT1G02529 | 0 | 0 | 0 | 1 | 0 | 0 | 0 | 0         | 0                | 1       |
| AT1G02530 | 0 | 0 | 0 | 1 | 0 | 0 | 0 | 0         | 0                | 1       |
| AT1G02531 | 0 | 0 | 0 | 1 | 0 | 0 | 0 | 0         | 0                | 1       |
| AT1G02532 | 0 | 0 | 0 | 1 | 0 | 0 | 0 | 0         | 0                | 1       |
| AT1G02533 | 0 | 0 | 0 | 1 | 0 | 0 | 0 | 0         | 0                | 1       |
| AT1G02534 | 0 | 0 | 0 | 1 | 0 | 0 | 0 | 0         | 0                | 1       |
| AT1G02535 | 0 | 0 | 0 | 1 | 0 | 0 | 0 | 0         | 0                | 1       |
| AT1G02536 | 0 | 0 | 0 | 1 | 0 | 0 | 0 | 0         | 0                | 1       |
| AT1G02537 | 0 | 0 | 0 | 1 | 0 | 0 | 0 | 0         | 0                | 1       |
| AT1G02538 | 0 | 0 | 0 | 1 | 0 | 0 | 0 | 0         | 0                | 1       |
| AT1G02539 | 0 | 0 | 0 | 1 | 0 | 0 | 0 | 0         | 0                | 1       |
| AT1G02540 | 0 | 0 | 0 | 1 | 0 | 0 | 0 | 0         | 0                | 1       |
| AT1G02541 | 0 | 0 | 0 | 1 | 0 | 0 | 0 | 0         | 0                | 1       |
| AT1G02542 | 0 | 0 | 0 | 1 | 0 | 0 | 0 | 0         | 0                | 1       |
| AT1G02543 | 0 | 0 | 0 | 1 | 0 | 0 | 0 | 0         | 0                | 1       |
| AT1G02544 | 0 | 0 | 0 | 1 | 0 | 0 | 0 | 0         | 0                | 1       |
| AT1G02545 | 0 | 0 | 0 | 1 | 0 | 0 | 0 | 0         | 0                | 1       |
| AT1G02546 | 0 | 0 | 0 | 1 | 0 | 0 | 0 | 0         | 0                | 1       |
| AT1G02547 | 0 | 0 | 0 | 1 | 0 | 0 | 0 | 0         | 0                | 1       |
| AT1G02548 | 0 | 0 | 0 | 1 | 0 | 0 | 0 | 0         | 0                | 1       |
| AT1G02549 | 0 | 0 | 0 | 1 | 0 | 0 | 0 | 0         | 0                | 1       |
| AT1G02550 | 0 | 0 | 0 | 1 | 0 | 0 | 0 | 0         | 0                | 1       |
| AT1G02551 | 0 | 0 | 0 | 1 | 0 | 0 | 0 | 0         | 0                | 1       |
| AT1G02552 | 0 | 0 | 0 | 1 | 0 | 0 | 0 | 0         | 0                | 1       |
| AT1G02553 | 0 | 0 | 0 | 1 | 0 | 0 | 0 | 0         | 0                | 1       |
| AT1G02554 | 0 | 0 | 0 | 1 | 0 | 0 | 0 | 0         | 0                | 1       |
| AT1G02555 | 0 | 0 | 0 | 1 | 0 | 0 | 0 | 0         | 0                | 1       |
| AT1G02556 | 0 | 0 | 0 | 1 | 0 | 0 | 0 | 0         | 0                | 1       |
| AT1G02557 | 0 | 0 | 0 | 1 | 0 | 0 | 0 | 0         | 0                | 1       |
| AT1G02558 | 0 | 0 | 0 | 1 | 0 | 0 | 0 | 0         | 0                | 1       |
| AT1G02559 | 0 | 0 | 0 | 1 | 0 | 0 | 0 | 0         | 0                | 1       |
| AT1G02560 | 0 | 0 | 0 | 1 | 0 | 0 | 0 | 0         | 0                | 1       |
| AT1G02561 | 0 | 0 | 0 | 1 | 0 | 0 | 0 | 0         | 0                | 1       |
| AT1G02562 | 0 | 0 | 0 | 1 | 0 | 0 | 0 | 0         | 0                | 1       |
| AT1G02563 | 0 | 0 | 0 | 1 | 0 | 0 | 0 | 0         | 0                | 1       |
| AT1G02564 | 0 | 0 | 0 | 1 | 0 | 0 | 0 | 0         | 0                | 1       |
| AT1G02565 | 0 | 0 | 0 | 1 | 0 | 0 | 0 | 0         | 0                | 1       |
| AT1G02566 | 0 | 0 | 0 | 1 | 0 | 0 | 0 | 0         | 0                | 1       |
| AT1G02567 | 0 | 0 | 0 | 1 | 0 | 0 | 0 | 0         | 0                | 1       |
| AT1G02568 | 0 | 0 | 0 | 1 | 0 | 0 | 0 | 0         | 0                | 1       |
| AT1G02569 | 0 | 0 | 0 | 1 | 0 | 0 | 0 | 0         | 0                | 1       |
| AT1G02570 | 0 | 0 | 0 | 1 | 0 | 0 | 0 | 0         | 0                | 1       |
| AT1G02571 | 0 | 0 | 0 | 1 | 0 | 0 | 0 | 0         | 0                | 1       |
| AT1G02572 | 0 | 0 | 0 | 1 | 0 | 0 | 0 | 0         | 0                | 1       |
| AT1G02573 | 0 | 0 | 0 | 1 | 0 | 0 | 0 | 0         | 0                | 1       |
| AT1G02574 | 0 | 0 | 0 | 1 | 0 | 0 | 0 | 0         | 0                | 1       |
| AT1G02575 | 0 | 0 | 0 | 1 | 0 | 0 | 0 | 0         | 0                | 1       |
| AT1G02576 | 0 | 0 | 0 | 1 | 0 | 0 | 0 | 0         | 0                | 1       |

Appendix Table S2

| Name      | 1 | 2 | 3 | 4 | 5 | 6 | 7 | pif45_Col | pif45bes1D_bes1D | ALL_PIF |
|-----------|---|---|---|---|---|---|---|-----------|------------------|---------|
| AT1G02577 | 0 | 0 | 0 | 1 | 0 | 0 | 0 | 0         | 0                | 1       |
| AT1G02578 | 0 | 0 | 0 | 1 | 0 | 0 | 0 | 0         | 0                | 1       |
| AT1G02579 | 0 | 0 | 0 | 1 | 0 | 0 | 0 | 0         | 0                | 1       |
| AT1G02580 | 0 | 0 | 0 | 1 | 0 | 0 | 0 | 0         | 0                | 1       |
| AT1G02581 | 0 | 0 | 0 | 1 | 0 | 0 | 0 | 0         | 0                | 1       |
| AT1G02582 | 0 | 0 | 0 | 1 | 0 | 0 | 0 | 0         | 0                | 1       |
| AT1G02583 | 0 | 0 | 0 | 1 | 0 | 0 | 0 | 0         | 0                | 1       |
| AT1G02584 | 0 | 0 | 0 | 1 | 0 | 0 | 0 | 0         | 0                | 1       |
| AT1G02585 | 0 | 0 | 0 | 1 | 0 | 0 | 0 | 0         | 0                | 1       |
| AT1G02586 | 0 | 0 | 0 | 1 | 0 | 0 | 0 | 0         | 0                | 1       |
| AT1G02587 | 0 | 0 | 0 | 1 | 0 | 0 | 0 | 0         | 0                | 1       |
| AT1G02588 | 0 | 0 | 0 | 1 | 0 | 0 | 0 | 0         | 0                | 1       |
| AT1G02589 | 0 | 0 | 0 | 1 | 0 | 0 | 0 | 0         | 0                | 1       |
| AT1G02590 | 0 | 0 | 0 | 1 | 0 | 0 | 0 | 0         | 0                | 1       |
| AT1G02591 | 0 | 0 | 0 | 1 | 0 | 0 | 0 | 0         | 0                | 1       |
| AT1G02592 | 0 | 0 | 0 | 1 | 0 | 0 | 0 | 0         | 0                | 1       |
| AT1G02593 | 0 | 0 | 0 | 1 | 0 | 0 | 0 | 0         | 0                | 1       |
| AT1G02594 | 0 | 0 | 0 | 1 | 0 | 0 | 0 | 0         | 0                | 1       |
| AT1G02595 | 0 | 0 | 0 | 1 | 0 | 0 | 0 | 0         | 0                | 1       |
| AT1G02596 | 0 | 0 | 0 | 1 | 0 | 0 | 0 | 0         | 0                | 1       |
| AT1G02597 | 0 | 0 | 0 | 1 | 0 | 0 | 0 | 0         | 0                | 1       |
| AT1G02598 | 0 | 0 | 0 | 1 | 0 | 0 | 0 | 0         | 0                | 1       |
| AT1G02599 | 0 | 0 | 0 | 1 | 0 | 0 | 0 | 0         | 0                | 1       |
| AT1G02600 | 0 | 0 | 0 | 1 | 0 | 0 | 0 | 0         | 0                | 1       |
| AT1G02601 | 0 | 0 | 0 | 1 | 0 | 0 | 0 | 0         | 0                | 1       |
| AT1G02602 | 0 | 0 | 0 | 1 | 0 | 0 | 0 | 0         | 0                | 1       |
| AT1G02603 | 0 | 0 | 0 | 1 | 0 | 0 | 0 | 0         | 0                | 1       |
| AT1G02604 | 0 | 0 | 0 | 1 | 0 | 0 | 0 | 0         | 0                | 1       |
| AT1G02605 | 0 | 0 | 0 | 1 | 0 | 0 | 0 | 0         | 0                | 1       |
| AT1G02606 | 0 | 0 | 0 | 1 | 0 | 0 | 0 | 0         | 0                | 1       |
| AT1G02607 | 0 | 0 | 0 | 1 | 0 | 0 | 0 | 0         | 0                | 1       |
| AT1G02608 | 0 | 0 | 0 | 1 | 0 | 0 | 0 | 0         | 0                | 1       |
| AT1G02609 | 0 | 0 | 0 | 1 | 0 | 0 | 0 | 0         | 0                | 1       |
| AT1G02610 | 0 | 0 | 0 | 1 | 0 | 0 | 0 | 0         | 0                | 1       |
| AT1G02611 | 0 | 0 | 0 | 1 | 0 | 0 | 0 | 0         | 0                | 1       |
| AT1G02612 | 0 | 0 | 0 | 1 | 0 | 0 | 0 | 0         | 0                | 1       |
| AT1G02613 | 0 | 0 | 0 | 1 | 0 | 0 | 0 | 0         | 0                | 1       |
| AT1G02614 | 0 | 0 | 0 | 1 | 0 | 0 | 0 | 0         | 0                | 1       |
| AT1G02615 | 0 | 0 | 0 | 1 | 0 | 0 | 0 | 0         | 0                | 1       |
| AT1G02616 | 0 | 0 | 0 | 1 | 0 | 0 | 0 | 0         | 0                | 1       |
| AT1G02617 | 0 | 0 | 0 | 1 | 0 | 0 | 0 | 0         | 0                | 1       |
| AT1G02618 | 0 | 0 | 0 | 1 | 0 | 0 | 0 | 0         | 0                | 1       |
| AT1G02619 | 0 | 0 | 0 | 1 | 0 | 0 | 0 | 0         | 0                | 1       |
| AT1G02620 | 0 | 0 | 0 | 1 | 0 | 0 | 0 | 0         | 0                | 1       |
| AT1G02621 | 0 | 0 | 0 | 1 | 0 | 0 | 0 | 0         | 0                | 1       |
| AT1G02622 | 0 | 0 | 0 | 1 | 0 | 0 | 0 | 0         | 0                | 1       |
| AT1G02623 | 0 | 0 | 0 | 1 | 0 | 0 | 0 | 0         | 0                | 1       |
| AT1G02624 | 0 | 0 | 0 | 1 | 0 | 0 | 0 | 0         | 0                | 1       |
| AT1G02625 | 0 | 0 | 0 | 1 | 0 | 0 | 0 | 0         | 0                | 1       |
| AT1G02626 | 0 | 0 | 0 | 1 | 0 | 0 | 0 | 0         | 0                | 1       |
| AT1G02627 | 0 | 0 | 0 | 1 | 0 | 0 | 0 | 0         | 0                | 1       |
| AT1G02628 | 0 | 0 | 0 | 1 | 0 | 0 | 0 | 0         | 0                | 1       |
| AT1G02629 | 0 | 0 | 0 | 1 | 0 | 0 | 0 | 0         | 0                | 1       |
| AT1G02630 | 0 | 0 | 0 | 1 | 0 | 0 | 0 | 0         | 0                | 1       |
| AT1G02631 | 0 | 0 | 0 | 1 | 0 | 0 | 0 | 0         | 0                | 1       |
| AT1G02632 | 0 | 0 | 0 | 1 | 0 | 0 | 0 | 0         | 0                | 1       |
| AT1G02633 | 0 | 0 | 0 | 1 | 0 | 0 | 0 | 0         | 0                | 1       |
| AT1G02634 | 0 | 0 | 0 | 1 | 0 | 0 | 0 | 0         | 0                | 1       |
| AT1G02635 | 0 | 0 | 0 | 1 | 0 | 0 | 0 | 0         | 0                | 1       |
| AT1G02636 | 0 | 0 | 0 | 1 | 0 | 0 | 0 | 0         | 0                | 1       |
| AT1G02637 | 0 | 0 | 0 | 1 | 0 | 0 | 0 | 0         | 0                | 1       |



Appendix Table S2

| Name      | 1 | 2  | 3 | 4 | 5 | 6 | 7  | pif45_Col | pif45bes1D_bes1D | ALL_PIF |
|-----------|---|----|---|---|---|---|----|-----------|------------------|---------|
| AT1G02638 | 0 | 0  | 0 | 1 | 0 | 0 | 0  | 0         | 0                | 1       |
| AT1G02639 | 0 | 0  | 0 | 1 | 0 | 0 | 0  | 0         | 0                | 1       |
| AT1G02640 | 0 | 0  | 0 | 0 | 0 | 0 | -1 | 0         | 0                | -1      |
| AT1G02640 | 0 | 0  | 0 | 1 | 0 | 0 | 0  | 0         | 0                | 1       |
| AT1G02641 | 0 | 0  | 0 | 1 | 0 | 0 | 0  | 0         | 0                | 1       |
| AT1G02642 | 0 | 0  | 0 | 1 | 0 | 0 | 0  | 0         | 0                | 1       |
| AT1G02643 | 0 | 0  | 0 | 1 | 0 | 0 | 0  | 0         | 0                | 1       |
| AT1G02644 | 0 | 0  | 0 | 1 | 0 | 0 | 0  | 0         | 0                | 1       |
| AT1G02645 | 0 | 0  | 0 | 1 | 0 | 0 | 0  | 0         | 0                | 1       |
| AT1G02646 | 0 | 0  | 0 | 1 | 0 | 0 | 0  | 0         | 0                | 1       |
| AT1G02647 | 0 | 0  | 0 | 1 | 0 | 0 | 0  | 0         | 0                | 1       |
| AT1G02648 | 0 | 0  | 0 | 1 | 0 | 0 | 0  | 0         | 0                | 1       |
| AT1G02649 | 0 | 0  | 0 | 1 | 0 | 0 | 0  | 0         | 0                | 1       |
| AT1G02650 | 0 | 0  | 0 | 1 | 0 | 0 | 0  | 0         | 0                | 1       |
| AT1G02651 | 0 | 0  | 0 | 1 | 0 | 0 | 0  | 0         | 0                | 1       |
| AT1G02652 | 0 | 0  | 0 | 1 | 0 | 0 | 0  | 0         | 0                | 1       |
| AT1G02653 | 0 | 0  | 0 | 1 | 0 | 0 | 0  | 0         | 0                | 1       |
| AT1G02654 | 0 | 0  | 0 | 1 | 0 | 0 | 0  | 0         | 0                | 1       |
| AT1G02655 | 0 | 0  | 0 | 1 | 0 | 0 | 0  | 0         | 0                | 1       |
| AT1G02656 | 0 | 0  | 0 | 1 | 0 | 0 | 0  | 0         | 0                | 1       |
| AT1G02657 | 0 | 0  | 0 | 1 | 0 | 0 | 0  | 0         | 0                | 1       |
| AT1G02658 | 0 | 0  | 0 | 1 | 0 | 0 | 0  | 0         | 0                | 1       |
| AT1G02659 | 0 | 0  | 0 | 1 | 0 | 0 | 0  | 0         | 0                | 1       |
| AT1G02660 | 0 | 0  | 0 | 1 | 0 | 0 | 0  | 0         | 0                | 1       |
| AT1G02661 | 0 | 0  | 0 | 1 | 0 | 0 | 0  | 0         | 0                | 1       |
| AT1G02662 | 0 | 0  | 0 | 1 | 0 | 0 | 0  | 0         | 0                | 1       |
| AT1G02663 | 0 | 0  | 0 | 1 | 0 | 0 | 0  | 0         | 0                | 1       |
| AT1G02664 | 0 | 0  | 0 | 1 | 0 | 0 | 0  | 0         | 0                | 1       |
| AT1G02665 | 0 | 0  | 0 | 1 | 0 | 0 | 0  | 0         | 0                | 1       |
| AT1G02666 | 0 | 0  | 0 | 1 | 0 | 0 | 0  | 0         | 0                | 1       |
| AT1G02667 | 0 | 0  | 0 | 1 | 0 | 0 | 0  | 0         | 0                | 1       |
| AT1G02668 | 0 | 0  | 0 | 1 | 0 | 0 | 0  | 0         | 0                | 1       |
| AT1G02669 | 0 | 0  | 0 | 1 | 0 | 0 | 0  | 0         | 0                | 1       |
| AT1G02670 | 0 | 0  | 0 | 1 | 0 | 0 | 0  | 0         | 0                | 1       |
| AT1G02671 | 0 | 0  | 0 | 1 | 0 | 0 | 0  | 0         | 0                | 1       |
| AT1G02672 | 0 | 0  | 0 | 1 | 0 | 0 | 0  | 0         | 0                | 1       |
| AT1G02673 | 0 | 0  | 0 | 1 | 0 | 0 | 0  | 0         | 0                | 1       |
| AT1G02674 | 0 | 0  | 0 | 1 | 0 | 0 | 0  | 0         | 0                | 1       |
| AT1G02675 | 0 | 0  | 0 | 1 | 0 | 0 | 0  | 0         | 0                | 1       |
| AT1G02676 | 0 | 0  | 0 | 1 | 0 | 0 | 0  | 0         | 0                | 1       |
| AT1G02677 | 0 | 0  | 0 | 1 | 0 | 0 | 0  | 0         | 0                | 1       |
| AT1G02678 | 0 | 0  | 0 | 1 | 0 | 0 | 0  | 0         | 0                | 1       |
| AT1G02679 | 0 | 0  | 0 | 1 | 0 | 0 | 0  | 0         | 0                | 1       |
| AT1G02680 | 0 | 0  | 0 | 1 | 0 | 0 | 0  | 0         | 0                | 1       |
| AT1G02681 | 0 | 0  | 0 | 1 | 0 | 0 | 0  | 0         | 0                | 1       |
| AT1G02682 | 0 | 0  | 0 | 1 | 0 | 0 | 0  | 0         | 0                | 1       |
| AT1G02683 | 0 | 0  | 0 | 1 | 0 | 0 | 0  | 0         | 0                | 1       |
| AT1G02684 | 0 | 0  | 0 | 1 | 0 | 0 | 0  | 0         | 0                | 1       |
| AT1G02685 | 0 | 0  | 0 | 1 | 0 | 0 | 0  | 0         | 0                | 1       |
| AT1G02686 | 0 | 0  | 0 | 1 | 0 | 0 | 0  | 0         | 0                | 1       |
| AT1G02687 | 0 | 0  | 0 | 1 | 0 | 0 | 0  | 0         | 0                | 1       |
| AT1G02688 | 0 | 0  | 0 | 1 | 0 | 0 | 0  | 0         | 0                | 1       |
| AT1G02689 | 0 | 0  | 0 | 1 | 0 | 0 | 0  | 0         | 0                | 1       |
| AT1G02690 | 0 | -1 | 0 | 0 | 0 | 0 | 0  | 0         | 0                | -1      |
| AT1G02690 | 0 | 0  | 0 | 1 | 0 | 0 | 0  | 0         | 0                | 1       |
| AT1G02691 | 0 | 0  | 0 | 1 | 0 | 0 | 0  | 0         | 0                | 1       |
| AT1G02692 | 0 | 0  | 0 | 1 | 0 | 0 | 0  | 0         | 0                | 1       |
| AT1G02693 | 0 | 0  | 0 | 1 | 0 | 0 | 0  | 0         | 0                | 1       |
| AT1G02694 | 0 | 0  | 0 | 1 | 0 | 0 | 0  | 0         | 0                | 1       |
| AT1G02695 | 0 | 0  | 0 | 1 | 0 | 0 | 0  | 0         | 0                | 1       |
| AT1G02696 | 0 | 0  | 0 | 1 | 0 | 0 | 0  | 0         | 0                | 1       |

Appendix Table S2

| Name      | 1 | 2 | 3 | 4 | 5 | 6 | 7 | pif45_Col | pif45bes1D_bes1D | ALL_PIF |
|-----------|---|---|---|---|---|---|---|-----------|------------------|---------|
| AT1G02697 | 0 | 0 | 0 | 1 | 0 | 0 | 0 | 0         | 0                | 1       |
| AT1G02698 | 0 | 0 | 0 | 1 | 0 | 0 | 0 | 0         | 0                | 1       |
| AT1G02699 | 0 | 0 | 0 | 1 | 0 | 0 | 0 | 0         | 0                | 1       |
| AT1G02700 | 0 | 0 | 0 | 1 | 0 | 0 | 0 | 0         | 0                | 1       |
| AT1G02701 | 0 | 0 | 0 | 1 | 0 | 0 | 0 | 0         | 0                | 1       |
| AT1G02702 | 0 | 0 | 0 | 1 | 0 | 0 | 0 | 0         | 0                | 1       |
| AT1G02703 | 0 | 0 | 0 | 1 | 0 | 0 | 0 | 0         | 0                | 1       |
| AT1G02704 | 0 | 0 | 0 | 1 | 0 | 0 | 0 | 0         | 0                | 1       |
| AT1G02705 | 0 | 0 | 0 | 1 | 0 | 0 | 0 | 0         | 0                | 1       |
| AT1G02706 | 0 | 0 | 0 | 1 | 0 | 0 | 0 | 0         | 0                | 1       |
| AT1G02707 | 0 | 0 | 0 | 1 | 0 | 0 | 0 | 0         | 0                | 1       |
| AT1G02708 | 0 | 0 | 0 | 1 | 0 | 0 | 0 | 0         | 0                | 1       |
| AT1G02709 | 0 | 0 | 0 | 1 | 0 | 0 | 0 | 0         | 0                | 1       |
| AT1G02710 | 0 | 0 | 0 | 1 | 0 | 0 | 0 | 0         | 0                | 1       |
| AT1G02711 | 0 | 0 | 0 | 1 | 0 | 0 | 0 | 0         | 0                | 1       |
| AT1G02712 | 0 | 0 | 0 | 1 | 0 | 0 | 0 | 0         | 0                | 1       |
| AT1G02713 | 0 | 0 | 0 | 1 | 0 | 0 | 0 | 0         | 0                | 1       |
| AT1G02714 | 0 | 0 | 0 | 1 | 0 | 0 | 0 | 0         | 0                | 1       |
| AT1G02715 | 0 | 0 | 0 | 1 | 0 | 0 | 0 | 0         | 0                | 1       |
| AT1G02716 | 0 | 0 | 0 | 1 | 0 | 0 | 0 | 0         | 0                | 1       |
| AT1G02717 | 0 | 0 | 0 | 1 | 0 | 0 | 0 | 0         | 0                | 1       |
| AT1G02718 | 0 | 0 | 0 | 1 | 0 | 0 | 0 | 0         | 0                | 1       |
| AT1G02719 | 0 | 0 | 0 | 1 | 0 | 0 | 0 | 0         | 0                | 1       |
| AT1G02720 | 0 | 0 | 0 | 1 | 0 | 0 | 0 | 0         | 0                | 1       |
| AT1G02721 | 0 | 0 | 0 | 1 | 0 | 0 | 0 | 0         | 0                | 1       |
| AT1G02722 | 0 | 0 | 0 | 1 | 0 | 0 | 0 | 0         | 0                | 1       |
| AT1G02723 | 0 | 0 | 0 | 1 | 0 | 0 | 0 | 0         | 0                | 1       |
| AT1G02724 | 0 | 0 | 0 | 1 | 0 | 0 | 0 | 0         | 0                | 1       |
| AT1G02725 | 0 | 0 | 0 | 1 | 0 | 0 | 0 | 0         | 0                | 1       |
| AT1G02726 | 0 | 0 | 0 | 1 | 0 | 0 | 0 | 0         | 0                | 1       |
| AT1G02727 | 0 | 0 | 0 | 1 | 0 | 0 | 0 | 0         | 0                | 1       |
| AT1G02728 | 0 | 0 | 0 | 1 | 0 | 0 | 0 | 0         | 0                | 1       |
| AT1G02729 | 0 | 0 | 0 | 1 | 0 | 0 | 0 | 0         | 0                | 1       |
| AT1G02730 | 0 | 0 | 0 | 1 | 0 | 0 | 0 | 0         | 0                | 1       |
| AT1G02731 | 0 | 0 | 0 | 1 | 0 | 0 | 0 | 0         | 0                | 1       |
| AT1G02732 | 0 | 0 | 0 | 1 | 0 | 0 | 0 | 0         | 0                | 1       |
| AT1G02733 | 0 | 0 | 0 | 1 | 0 | 0 | 0 | 0         | 0                | 1       |
| AT1G02734 | 0 | 0 | 0 | 1 | 0 | 0 | 0 | 0         | 0                | 1       |
| AT1G02735 | 0 | 0 | 0 | 1 | 0 | 0 | 0 | 0         | 0                | 1       |
| AT1G02736 | 0 | 0 | 0 | 1 | 0 | 0 | 0 | 0         | 0                | 1       |
| AT1G02737 | 0 | 0 | 0 | 1 | 0 | 0 | 0 | 0         | 0                | 1       |
| AT1G02738 | 0 | 0 | 0 | 1 | 0 | 0 | 0 | 0         | 0                | 1       |
| AT1G02739 | 0 | 0 | 0 | 1 | 0 | 0 | 0 | 0         | 0                | 1       |
| AT1G02740 | 0 | 0 | 0 | 1 | 0 | 0 | 0 | 0         | 0                | 1       |
| AT1G02741 | 0 | 0 | 0 | 1 | 0 | 0 | 0 | 0         | 0                | 1       |
| AT1G02742 | 0 | 0 | 0 | 1 | 0 | 0 | 0 | 0         | 0                | 1       |
| AT1G02743 | 0 | 0 | 0 | 1 | 0 | 0 | 0 | 0         | 0                | 1       |
| AT1G02744 | 0 | 0 | 0 | 1 | 0 | 0 | 0 | 0         | 0                | 1       |
| AT1G02745 | 0 | 0 | 0 | 1 | 0 | 0 | 0 | 0         | 0                | 1       |
| AT1G02746 | 0 | 0 | 0 | 1 | 0 | 0 | 0 | 0         | 0                | 1       |
| AT1G02747 | 0 | 0 | 0 | 1 | 0 | 0 | 0 | 0         | 0                | 1       |
| AT1G02748 | 0 | 0 | 0 | 1 | 0 | 0 | 0 | 0         | 0                | 1       |
| AT1G02749 | 0 | 0 | 0 | 1 | 0 | 0 | 0 | 0         | 0                | 1       |
| AT1G02750 | 0 | 0 | 0 | 1 | 0 | 0 | 0 | 0         | 0                | 1       |
| AT1G02751 | 0 | 0 | 0 | 1 | 0 | 0 | 0 | 0         | 0                | 1       |
| AT1G02752 | 0 | 0 | 0 | 1 | 0 | 0 | 0 | 0         | 0                | 1       |
| AT1G02753 | 0 | 0 | 0 | 1 | 0 | 0 | 0 | 0         | 0                | 1       |
| AT1G02754 | 0 | 0 | 0 | 1 | 0 | 0 | 0 | 0         | 0                | 1       |
| AT1G02755 | 0 | 0 | 0 | 1 | 0 | 0 | 0 | 0         | 0                | 1       |
| AT1G02756 | 0 | 0 | 0 | 1 | 0 | 0 | 0 | 0         | 0                | 1       |
| AT1G02757 | 0 | 0 | 0 | 1 | 0 | 0 | 0 | 0         | 0                | 1       |

Appendix Table S2

| Name      | 1 | 2 | 3 | 4 | 5 | 6 | 7 | pif45_Col | pif45bes1D_bes1D | ALL_PIF |
|-----------|---|---|---|---|---|---|---|-----------|------------------|---------|
| AT1G02758 | 0 | 0 | 0 | 1 | 0 | 0 | 0 | 0         | 0                | 1       |
| AT1G02759 | 0 | 0 | 0 | 1 | 0 | 0 | 0 | 0         | 0                | 1       |
| AT1G02760 | 0 | 0 | 0 | 1 | 0 | 0 | 0 | 0         | 0                | 1       |
| AT1G02761 | 0 | 0 | 0 | 1 | 0 | 0 | 0 | 0         | 0                | 1       |
| AT1G02762 | 0 | 0 | 0 | 1 | 0 | 0 | 0 | 0         | 0                | 1       |
| AT1G02763 | 0 | 0 | 0 | 1 | 0 | 0 | 0 | 0         | 0                | 1       |
| AT1G02764 | 0 | 0 | 0 | 1 | 0 | 0 | 0 | 0         | 0                | 1       |
| AT1G02765 | 0 | 0 | 0 | 1 | 0 | 0 | 0 | 0         | 0                | 1       |
| AT1G02766 | 0 | 0 | 0 | 1 | 0 | 0 | 0 | 0         | 0                | 1       |
| AT1G02767 | 0 | 0 | 0 | 1 | 0 | 0 | 0 | 0         | 0                | 1       |
| AT1G02768 | 0 | 0 | 0 | 1 | 0 | 0 | 0 | 0         | 0                | 1       |
| AT1G02769 | 0 | 0 | 0 | 1 | 0 | 0 | 0 | 0         | 0                | 1       |
| AT1G02770 | 0 | 0 | 0 | 1 | 0 | 0 | 0 | 0         | 0                | 1       |
| AT1G02771 | 0 | 0 | 0 | 1 | 0 | 0 | 0 | 0         | 0                | 1       |
| AT1G02772 | 0 | 0 | 0 | 1 | 0 | 0 | 0 | 0         | 0                | 1       |
| AT1G02773 | 0 | 0 | 0 | 1 | 0 | 0 | 0 | 0         | 0                | 1       |
| AT1G02774 | 0 | 0 | 0 | 1 | 0 | 0 | 0 | 0         | 0                | 1       |
| AT1G02775 | 0 | 0 | 0 | 1 | 0 | 0 | 0 | 0         | 0                | 1       |
| AT1G02776 | 0 | 0 | 0 | 1 | 0 | 0 | 0 | 0         | 0                | 1       |
| AT1G02777 | 0 | 0 | 0 | 1 | 0 | 0 | 0 | 0         | 0                | 1       |
| AT1G02778 | 0 | 0 | 0 | 1 | 0 | 0 | 0 | 0         | 0                | 1       |
| AT1G02779 | 0 | 0 | 0 | 1 | 0 | 0 | 0 | 0         | 0                | 1       |
| AT1G02780 | 0 | 0 | 0 | 1 | 0 | 0 | 0 | 0         | 0                | 1       |
| AT1G02781 | 0 | 0 | 0 | 1 | 0 | 0 | 0 | 0         | 0                | 1       |
| AT1G02782 | 0 | 0 | 0 | 1 | 0 | 0 | 0 | 0         | 0                | 1       |
| AT1G02783 | 0 | 0 | 0 | 1 | 0 | 0 | 0 | 0         | 0                | 1       |
| AT1G02784 | 0 | 0 | 0 | 1 | 0 | 0 | 0 | 0         | 0                | 1       |
| AT1G02785 | 0 | 0 | 0 | 1 | 0 | 0 | 0 | 0         | 0                | 1       |
| AT1G02786 | 0 | 0 | 0 | 1 | 0 | 0 | 0 | 0         | 0                | 1       |
| AT1G02787 | 0 | 0 | 0 | 1 | 0 | 0 | 0 | 0         | 0                | 1       |
| AT1G02788 | 0 | 0 | 0 | 1 | 0 | 0 | 0 | 0         | 0                | 1       |
| AT1G02789 | 0 | 0 | 0 | 1 | 0 | 0 | 0 | 0         | 0                | 1       |
| AT1G02790 | 0 | 0 | 0 | 1 | 0 | 0 | 0 | 0         | 0                | 1       |
| AT1G02791 | 0 | 0 | 0 | 1 | 0 | 0 | 0 | 0         | 0                | 1       |
| AT1G02792 | 0 | 0 | 0 | 1 | 0 | 0 | 0 | 0         | 0                | 1       |
| AT1G02793 | 0 | 0 | 0 | 1 | 0 | 0 | 0 | 0         | 0                | 1       |
| AT1G02794 | 0 | 0 | 0 | 1 | 0 | 0 | 0 | 0         | 0                | 1       |
| AT1G02795 | 0 | 0 | 0 | 1 | 0 | 0 | 0 | 0         | 0                | 1       |
| AT1G02796 | 0 | 0 | 0 | 1 | 0 | 0 | 0 | 0         | 0                | 1       |
| AT1G02797 | 0 | 0 | 0 | 1 | 0 | 0 | 0 | 0         | 0                | 1       |
| AT1G02798 | 0 | 0 | 0 | 1 | 0 | 0 | 0 | 0         | 0                | 1       |
| AT1G02799 | 0 | 0 | 0 | 1 | 0 | 0 | 0 | 0         | 0                | 1       |
| AT1G02800 | 0 | 0 | 0 | 1 | 0 | 0 | 0 | 0         | 0                | 1       |
| AT1G02800 | 0 | 1 | 0 | 1 | 0 | 1 | 1 | 1         | 0                | 1       |
| AT1G02801 | 0 | 0 | 0 | 1 | 0 | 0 | 0 | 0         | 0                | 1       |
| AT1G02802 | 0 | 0 | 0 | 1 | 0 | 0 | 0 | 0         | 0                | 1       |
| AT1G02803 | 0 | 0 | 0 | 1 | 0 | 0 | 0 | 0         | 0                | 1       |
| AT1G02804 | 0 | 0 | 0 | 1 | 0 | 0 | 0 | 0         | 0                | 1       |
| AT1G02805 | 0 | 0 | 0 | 1 | 0 | 0 | 0 | 0         | 0                | 1       |
| AT1G02806 | 0 | 0 | 0 | 1 | 0 | 0 | 0 | 0         | 0                | 1       |
| AT1G02807 | 0 | 0 | 0 | 1 | 0 | 0 | 0 | 0         | 0                | 1       |
| AT1G02808 | 0 | 0 | 0 | 1 | 0 | 0 | 0 | 0         | 0                | 1       |
| AT1G02809 | 0 | 0 | 0 | 1 | 0 | 0 | 0 | 0         | 0                | 1       |
| AT1G02810 | 0 | 0 | 0 | 1 | 0 | 0 | 0 | 0         | 0                | 1       |
| AT1G02810 | 0 | 0 | 0 | 1 | 0 | 0 | 1 | 0         | 0                | 1       |
| AT1G02811 | 0 | 0 | 0 | 1 | 0 | 0 | 0 | 0         | 0                | 1       |
| AT1G02812 | 0 | 0 | 0 | 1 | 0 | 0 | 0 | 0         | 0                | 1       |
| AT1G02813 | 0 | 0 | 0 | 1 | 0 | 0 | 0 | 0         | 0                | 1       |
| AT1G02814 | 0 | 0 | 0 | 1 | 0 | 0 | 0 | 0         | 0                | 1       |
| AT1G02815 | 0 | 0 | 0 | 1 | 0 | 0 | 0 | 0         | 0                | 1       |
| AT1G02816 | 0 | 0 | 0 | 1 | 0 | 0 | 0 | 0         | 0                | 1       |

Appendix Table S2

| Name      | 1 | 2  | 3 | 4  | 5 | 6 | 7 | pif45_Col | pif45bes1D_bes1D | ALL_PIF |
|-----------|---|----|---|----|---|---|---|-----------|------------------|---------|
| AT1G02817 | 0 | 0  | 0 | 1  | 0 | 0 | 0 | 0         | 0                | 1       |
| AT1G02818 | 0 | 0  | 0 | 1  | 0 | 0 | 0 | 0         | 0                | 1       |
| AT1G02819 | 0 | 0  | 0 | 1  | 0 | 0 | 0 | 0         | 0                | 1       |
| AT1G02820 | 0 | -1 | 0 | 0  | 0 | 0 | 0 | 0         | 0                | -1      |
| AT1G02820 | 0 | 0  | 0 | 1  | 0 | 0 | 0 | 0         | 0                | 1       |
| AT1G02821 | 0 | 0  | 0 | 1  | 0 | 0 | 0 | 0         | 0                | 1       |
| AT1G02822 | 0 | 0  | 0 | 1  | 0 | 0 | 0 | 0         | 0                | 1       |
| AT1G02823 | 0 | 0  | 0 | 1  | 0 | 0 | 0 | 0         | 0                | 1       |
| AT1G02824 | 0 | 0  | 0 | 1  | 0 | 0 | 0 | 0         | 0                | 1       |
| AT1G02825 | 0 | 0  | 0 | 1  | 0 | 0 | 0 | 0         | 0                | 1       |
| AT1G02826 | 0 | 0  | 0 | 1  | 0 | 0 | 0 | 0         | 0                | 1       |
| AT1G02827 | 0 | 0  | 0 | 1  | 0 | 0 | 0 | 0         | 0                | 1       |
| AT1G02828 | 0 | 0  | 0 | 1  | 0 | 0 | 0 | 0         | 0                | 1       |
| AT1G02829 | 0 | 0  | 0 | 1  | 0 | 0 | 0 | 0         | 0                | 1       |
| AT1G02830 | 0 | 0  | 0 | 1  | 0 | 0 | 0 | 0         | 0                | 1       |
| AT1G02831 | 0 | 0  | 0 | 1  | 0 | 0 | 0 | 0         | 0                | 1       |
| AT1G02832 | 0 | 0  | 0 | 1  | 0 | 0 | 0 | 0         | 0                | 1       |
| AT1G02833 | 0 | 0  | 0 | 1  | 0 | 0 | 0 | 0         | 0                | 1       |
| AT1G02834 | 0 | 0  | 0 | 1  | 0 | 0 | 0 | 0         | 0                | 1       |
| AT1G02835 | 0 | 0  | 0 | 1  | 0 | 0 | 0 | 0         | 0                | 1       |
| AT1G02836 | 0 | 0  | 0 | 1  | 0 | 0 | 0 | 0         | 0                | 1       |
| AT1G02837 | 0 | 0  | 0 | 1  | 0 | 0 | 0 | 0         | 0                | 1       |
| AT1G02838 | 0 | 0  | 0 | 1  | 0 | 0 | 0 | 0         | 0                | 1       |
| AT1G02839 | 0 | 0  | 0 | 1  | 0 | 0 | 0 | 0         | 0                | 1       |
| AT1G02840 | 0 | 0  | 0 | 1  | 0 | 0 | 0 | 0         | 0                | 1       |
| AT1G02841 | 0 | 0  | 0 | 1  | 0 | 0 | 0 | 0         | 0                | 1       |
| AT1G02842 | 0 | 0  | 0 | 1  | 0 | 0 | 0 | 0         | 0                | 1       |
| AT1G02843 | 0 | 0  | 0 | 1  | 0 | 0 | 0 | 0         | 0                | 1       |
| AT1G02844 | 0 | 0  | 0 | 1  | 0 | 0 | 0 | 0         | 0                | 1       |
| AT1G02845 | 0 | 0  | 0 | 1  | 0 | 0 | 0 | 0         | 0                | 1       |
| AT1G02846 | 0 | 0  | 0 | 1  | 0 | 0 | 0 | 0         | 0                | 1       |
| AT1G02847 | 0 | 0  | 0 | 1  | 0 | 0 | 0 | 0         | 0                | 1       |
| AT1G02848 | 0 | 0  | 0 | 1  | 0 | 0 | 0 | 0         | 0                | 1       |
| AT1G02849 | 0 | 0  | 0 | 1  | 0 | 0 | 0 | 0         | 0                | 1       |
| AT1G02850 | 0 | 0  | 0 | -1 | 0 | 0 | 0 | 0         | 0                | -1      |
| AT1G02850 | 0 | 0  | 0 | 1  | 0 | 0 | 0 | 0         | 0                | 1       |
| AT1G02851 | 0 | 0  | 0 | 1  | 0 | 0 | 0 | 0         | 0                | 1       |
| AT1G02852 | 0 | 0  | 0 | 1  | 0 | 0 | 0 | 0         | 0                | 1       |
| AT1G02853 | 0 | 0  | 0 | 1  | 0 | 0 | 0 | 0         | 0                | 1       |
| AT1G02854 | 0 | 0  | 0 | 1  | 0 | 0 | 0 | 0         | 0                | 1       |
| AT1G02855 | 0 | 0  | 0 | 1  | 0 | 0 | 0 | 0         | 0                | 1       |
| AT1G02856 | 0 | 0  | 0 | 1  | 0 | 0 | 0 | 0         | 0                | 1       |
| AT1G02857 | 0 | 0  | 0 | 1  | 0 | 0 | 0 | 0         | 0                | 1       |
| AT1G02858 | 0 | 0  | 0 | 1  | 0 | 0 | 0 | 0         | 0                | 1       |
| AT1G02859 | 0 | 0  | 0 | 1  | 0 | 0 | 0 | 0         | 0                | 1       |
| AT1G02860 | 0 | 0  | 0 | 1  | 0 | 0 | 0 | 0         | 0                | 1       |
| AT1G02861 | 0 | 0  | 0 | 1  | 0 | 0 | 0 | 0         | 0                | 1       |
| AT1G02862 | 0 | 0  | 0 | 1  | 0 | 0 | 0 | 0         | 0                | 1       |
| AT1G02863 | 0 | 0  | 0 | 1  | 0 | 0 | 0 | 0         | 0                | 1       |
| AT1G02864 | 0 | 0  | 0 | 1  | 0 | 0 | 0 | 0         | 0                | 1       |
| AT1G02865 | 0 | 0  | 0 | 1  | 0 | 0 | 0 | 0         | 0                | 1       |
| AT1G02866 | 0 | 0  | 0 | 1  | 0 | 0 | 0 | 0         | 0                | 1       |
| AT1G02867 | 0 | 0  | 0 | 1  | 0 | 0 | 0 | 0         | 0                | 1       |
| AT1G02868 | 0 | 0  | 0 | 1  | 0 | 0 | 0 | 0         | 0                | 1       |
| AT1G02869 | 0 | 0  | 0 | 1  | 0 | 0 | 0 | 0         | 0                | 1       |
| AT1G02870 | 0 | 0  | 0 | 1  | 0 | 0 | 0 | 0         | 0                | 1       |
| AT1G02871 | 0 | 0  | 0 | 1  | 0 | 0 | 0 | 0         | 0                | 1       |
| AT1G02872 | 0 | 0  | 0 | 1  | 0 | 0 | 0 | 0         | 0                | 1       |
| AT1G02873 | 0 | 0  | 0 | 1  | 0 | 0 | 0 | 0         | 0                | 1       |
| AT1G02874 | 0 | 0  | 0 | 1  | 0 | 0 | 0 | 0         | 0                | 1       |
| AT1G02875 | 0 | 0  | 0 | 1  | 0 | 0 | 0 | 0         | 0                | 1       |

Appendix Table S2

| Name      | 1 | 2 | 3 | 4 | 5 | 6 | 7  | pif45_Col | pif45bes1D_bes1D | ALL_PIF |
|-----------|---|---|---|---|---|---|----|-----------|------------------|---------|
| AT1G02876 | 0 | 0 | 0 | 1 | 0 | 0 | 0  | 0         | 0                | 1       |
| AT1G02877 | 0 | 0 | 0 | 1 | 0 | 0 | 0  | 0         | 0                | 1       |
| AT1G02878 | 0 | 0 | 0 | 1 | 0 | 0 | 0  | 0         | 0                | 1       |
| AT1G02879 | 0 | 0 | 0 | 1 | 0 | 0 | 0  | 0         | 0                | 1       |
| AT1G02880 | 0 | 0 | 0 | 1 | 0 | 0 | 0  | 0         | 0                | 1       |
| AT1G02881 | 0 | 0 | 0 | 1 | 0 | 0 | 0  | 0         | 0                | 1       |
| AT1G02882 | 0 | 0 | 0 | 1 | 0 | 0 | 0  | 0         | 0                | 1       |
| AT1G02883 | 0 | 0 | 0 | 1 | 0 | 0 | 0  | 0         | 0                | 1       |
| AT1G02884 | 0 | 0 | 0 | 1 | 0 | 0 | 0  | 0         | 0                | 1       |
| AT1G02885 | 0 | 0 | 0 | 1 | 0 | 0 | 0  | 0         | 0                | 1       |
| AT1G02886 | 0 | 0 | 0 | 1 | 0 | 0 | 0  | 0         | 0                | 1       |
| AT1G02887 | 0 | 0 | 0 | 1 | 0 | 0 | 0  | 0         | 0                | 1       |
| AT1G02888 | 0 | 0 | 0 | 1 | 0 | 0 | 0  | 0         | 0                | 1       |
| AT1G02889 | 0 | 0 | 0 | 1 | 0 | 0 | 0  | 0         | 0                | 1       |
| AT1G02890 | 0 | 0 | 0 | 1 | 0 | 0 | 0  | 0         | 0                | 1       |
| AT1G02891 | 0 | 0 | 0 | 1 | 0 | 0 | 0  | 0         | 0                | 1       |
| AT1G02892 | 0 | 0 | 0 | 1 | 0 | 0 | 0  | 0         | 0                | 1       |
| AT1G02893 | 0 | 0 | 0 | 1 | 0 | 0 | 0  | 0         | 0                | 1       |
| AT1G02894 | 0 | 0 | 0 | 1 | 0 | 0 | 0  | 0         | 0                | 1       |
| AT1G02895 | 0 | 0 | 0 | 1 | 0 | 0 | 0  | 0         | 0                | 1       |
| AT1G02896 | 0 | 0 | 0 | 1 | 0 | 0 | 0  | 0         | 0                | 1       |
| AT1G02897 | 0 | 0 | 0 | 1 | 0 | 0 | 0  | 0         | 0                | 1       |
| AT1G02898 | 0 | 0 | 0 | 1 | 0 | 0 | 0  | 0         | 0                | 1       |
| AT1G02899 | 0 | 0 | 0 | 1 | 0 | 0 | 0  | 0         | 0                | 1       |
| AT1G02900 | 0 | 0 | 0 | 0 | 0 | 0 | -1 | 0         | 0                | -1      |
| AT1G02900 | 0 | 0 | 0 | 1 | 0 | 0 | 0  | 0         | 0                | 1       |
| AT1G02901 | 0 | 0 | 0 | 1 | 0 | 0 | 0  | 0         | 0                | 1       |
| AT1G02902 | 0 | 0 | 0 | 1 | 0 | 0 | 0  | 0         | 0                | 1       |
| AT1G02903 | 0 | 0 | 0 | 1 | 0 | 0 | 0  | 0         | 0                | 1       |
| AT1G02904 | 0 | 0 | 0 | 1 | 0 | 0 | 0  | 0         | 0                | 1       |
| AT1G02905 | 0 | 0 | 0 | 1 | 0 | 0 | 0  | 0         | 0                | 1       |
| AT1G02906 | 0 | 0 | 0 | 1 | 0 | 0 | 0  | 0         | 0                | 1       |
| AT1G02907 | 0 | 0 | 0 | 1 | 0 | 0 | 0  | 0         | 0                | 1       |
| AT1G02908 | 0 | 0 | 0 | 1 | 0 | 0 | 0  | 0         | 0                | 1       |
| AT1G02909 | 0 | 0 | 0 | 1 | 0 | 0 | 0  | 0         | 0                | 1       |
| AT1G02910 | 0 | 0 | 0 | 1 | 0 | 0 | 0  | 0         | 0                | 1       |
| AT1G02911 | 0 | 0 | 0 | 1 | 0 | 0 | 0  | 0         | 0                | 1       |
| AT1G02912 | 0 | 0 | 0 | 1 | 0 | 0 | 0  | 0         | 0                | 1       |
| AT1G02913 | 0 | 0 | 0 | 1 | 0 | 0 | 0  | 0         | 0                | 1       |
| AT1G02914 | 0 | 0 | 0 | 1 | 0 | 0 | 0  | 0         | 0                | 1       |
| AT1G02915 | 0 | 0 | 0 | 1 | 0 | 0 | 0  | 0         | 0                | 1       |
| AT1G02916 | 0 | 0 | 0 | 1 | 0 | 0 | 0  | 0         | 0                | 1       |
| AT1G02917 | 0 | 0 | 0 | 1 | 0 | 0 | 0  | 0         | 0                | 1       |
| AT1G02918 | 0 | 0 | 0 | 1 | 0 | 0 | 0  | 0         | 0                | 1       |
| AT1G02919 | 0 | 0 | 0 | 1 | 0 | 0 | 0  | 0         | 0                | 1       |
| AT1G02920 | 0 | 0 | 0 | 1 | 0 | 0 | 0  | 0         | 0                | 1       |
| AT1G02921 | 0 | 0 | 0 | 1 | 0 | 0 | 0  | 0         | 0                | 1       |
| AT1G02922 | 0 | 0 | 0 | 1 | 0 | 0 | 0  | 0         | 0                | 1       |
| AT1G02923 | 0 | 0 | 0 | 1 | 0 | 0 | 0  | 0         | 0                | 1       |
| AT1G02924 | 0 | 0 | 0 | 1 | 0 | 0 | 0  | 0         | 0                | 1       |
| AT1G02925 | 0 | 0 | 0 | 1 | 0 | 0 | 0  | 0         | 0                | 1       |
| AT1G02926 | 0 | 0 | 0 | 1 | 0 | 0 | 0  | 0         | 0                | 1       |
| AT1G02927 | 0 | 0 | 0 | 1 | 0 | 0 | 0  | 0         | 0                | 1       |
| AT1G02928 | 0 | 0 | 0 | 1 | 0 | 0 | 0  | 0         | 0                | 1       |
| AT1G02929 | 0 | 0 | 0 | 1 | 0 | 0 | 0  | 0         | 0                | 1       |
| AT1G02930 | 0 | 0 | 0 | 1 | 0 | 0 | 0  | 0         | 0                | 1       |
| AT1G02931 | 0 | 0 | 0 | 1 | 0 | 0 | 0  | 0         | 0                | 1       |
| AT1G02932 | 0 | 0 | 0 | 1 | 0 | 0 | 0  | 0         | 0                | 1       |
| AT1G02933 | 0 | 0 | 0 | 1 | 0 | 0 | 0  | 0         | 0                | 1       |
| AT1G02934 | 0 | 0 | 0 | 1 | 0 | 0 | 0  | 0         | 0                | 1       |
| AT1G02935 | 0 | 0 | 0 | 1 | 0 | 0 | 0  | 0         | 0                | 1       |

Appendix Table S2

| Name      | 1 | 2 | 3 | 4 | 5 | 6 | 7 | pif45_Col | pif45bes1D_bes1D | ALL_PIF |
|-----------|---|---|---|---|---|---|---|-----------|------------------|---------|
| AT1G02936 | 0 | 0 | 0 | 1 | 0 | 0 | 0 | 0         | 0                | 1       |
| AT1G02937 | 0 | 0 | 0 | 1 | 0 | 0 | 0 | 0         | 0                | 1       |
| AT1G02938 | 0 | 0 | 0 | 1 | 0 | 0 | 0 | 0         | 0                | 1       |
| AT1G02939 | 0 | 0 | 0 | 1 | 0 | 0 | 0 | 0         | 0                | 1       |
| AT1G02940 | 0 | 0 | 0 | 1 | 0 | 0 | 0 | 0         | 0                | 1       |
| AT1G02941 | 0 | 0 | 0 | 1 | 0 | 0 | 0 | 0         | 0                | 1       |
| AT1G02942 | 0 | 0 | 0 | 1 | 0 | 0 | 0 | 0         | 0                | 1       |
| AT1G02943 | 0 | 0 | 0 | 1 | 0 | 0 | 0 | 0         | 0                | 1       |
| AT1G02944 | 0 | 0 | 0 | 1 | 0 | 0 | 0 | 0         | 0                | 1       |
| AT1G02945 | 0 | 0 | 0 | 1 | 0 | 0 | 0 | 0         | 0                | 1       |
| AT1G02946 | 0 | 0 | 0 | 1 | 0 | 0 | 0 | 0         | 0                | 1       |
| AT1G02947 | 0 | 0 | 0 | 1 | 0 | 0 | 0 | 0         | 0                | 1       |
| AT1G02948 | 0 | 0 | 0 | 1 | 0 | 0 | 0 | 0         | 0                | 1       |
| AT1G02949 | 0 | 0 | 0 | 1 | 0 | 0 | 0 | 0         | 0                | 1       |
| AT1G02950 | 0 | 0 | 0 | 1 | 0 | 0 | 0 | 0         | 0                | 1       |
| AT1G02951 | 0 | 0 | 0 | 1 | 0 | 0 | 0 | 0         | 0                | 1       |
| AT1G02952 | 0 | 0 | 0 | 1 | 0 | 0 | 0 | 0         | 0                | 1       |
| AT1G02953 | 0 | 0 | 0 | 1 | 0 | 0 | 0 | 0         | 0                | 1       |
| AT1G02954 | 0 | 0 | 0 | 1 | 0 | 0 | 0 | 0         | 0                | 1       |
| AT1G02955 | 0 | 0 | 0 | 1 | 0 | 0 | 0 | 0         | 0                | 1       |
| AT1G02956 | 0 | 0 | 0 | 1 | 0 | 0 | 0 | 0         | 0                | 1       |
| AT1G02957 | 0 | 0 | 0 | 1 | 0 | 0 | 0 | 0         | 0                | 1       |
| AT1G02958 | 0 | 0 | 0 | 1 | 0 | 0 | 0 | 0         | 0                | 1       |
| AT1G02959 | 0 | 0 | 0 | 1 | 0 | 0 | 0 | 0         | 0                | 1       |
| AT1G02960 | 0 | 0 | 0 | 1 | 0 | 0 | 0 | 0         | 0                | 1       |
| AT1G02961 | 0 | 0 | 0 | 1 | 0 | 0 | 0 | 0         | 0                | 1       |
| AT1G02962 | 0 | 0 | 0 | 1 | 0 | 0 | 0 | 0         | 0                | 1       |
| AT1G02963 | 0 | 0 | 0 | 1 | 0 | 0 | 0 | 0         | 0                | 1       |
| AT1G02964 | 0 | 0 | 0 | 1 | 0 | 0 | 0 | 0         | 0                | 1       |
| AT1G02965 | 0 | 0 | 0 | 1 | 0 | 0 | 0 | 0         | 0                | 1       |
| AT1G02966 | 0 | 0 | 0 | 1 | 0 | 0 | 0 | 0         | 0                | 1       |
| AT1G02967 | 0 | 0 | 0 | 1 | 0 | 0 | 0 | 0         | 0                | 1       |
| AT1G02968 | 0 | 0 | 0 | 1 | 0 | 0 | 0 | 0         | 0                | 1       |
| AT1G02969 | 0 | 0 | 0 | 1 | 0 | 0 | 0 | 0         | 0                | 1       |
| AT1G02970 | 0 | 0 | 0 | 1 | 0 | 0 | 0 | 0         | 0                | 1       |
| AT1G02971 | 0 | 0 | 0 | 1 | 0 | 0 | 0 | 0         | 0                | 1       |
| AT1G02972 | 0 | 0 | 0 | 1 | 0 | 0 | 0 | 0         | 0                | 1       |
| AT1G02973 | 0 | 0 | 0 | 1 | 0 | 0 | 0 | 0         | 0                | 1       |
| AT1G02974 | 0 | 0 | 0 | 1 | 0 | 0 | 0 | 0         | 0                | 1       |
| AT1G02975 | 0 | 0 | 0 | 1 | 0 | 0 | 0 | 0         | 0                | 1       |
| AT1G02976 | 0 | 0 | 0 | 1 | 0 | 0 | 0 | 0         | 0                | 1       |
| AT1G02977 | 0 | 0 | 0 | 1 | 0 | 0 | 0 | 0         | 0                | 1       |
| AT1G02978 | 0 | 0 | 0 | 1 | 0 | 0 | 0 | 0         | 0                | 1       |
| AT1G02979 | 0 | 0 | 0 | 1 | 0 | 0 | 0 | 0         | 0                | 1       |
| AT1G02980 | 0 | 0 | 0 | 1 | 0 | 0 | 0 | 0         | 0                | 1       |
| AT1G02981 | 0 | 0 | 0 | 1 | 0 | 0 | 0 | 0         | 0                | 1       |
| AT1G02982 | 0 | 0 | 0 | 1 | 0 | 0 | 0 | 0         | 0                | 1       |
| AT1G02983 | 0 | 0 | 0 | 1 | 0 | 0 | 0 | 0         | 0                | 1       |
| AT1G02984 | 0 | 0 | 0 | 1 | 0 | 0 | 0 | 0         | 0                | 1       |
| AT1G02985 | 0 | 0 | 0 | 1 | 0 | 0 | 0 | 0         | 0                | 1       |
| AT1G02986 | 0 | 0 | 0 | 1 | 0 | 0 | 0 | 0         | 0                | 1       |
| AT1G02987 | 0 | 0 | 0 | 1 | 0 | 0 | 0 | 0         | 0                | 1       |
| AT1G02988 | 0 | 0 | 0 | 1 | 0 | 0 | 0 | 0         | 0                | 1       |
| AT1G02989 | 0 | 0 | 0 | 1 | 0 | 0 | 0 | 0         | 0                | 1       |
| AT1G02990 | 0 | 0 | 0 | 1 | 0 | 0 | 0 | 0         | 0                | 1       |
| AT1G02991 | 0 | 0 | 0 | 1 | 0 | 0 | 0 | 0         | 0                | 1       |
| AT1G02992 | 0 | 0 | 0 | 1 | 0 | 0 | 0 | 0         | 0                | 1       |
| AT1G02993 | 0 | 0 | 0 | 1 | 0 | 0 | 0 | 0         | 0                | 1       |
| AT1G02994 | 0 | 0 | 0 | 1 | 0 | 0 | 0 | 0         | 0                | 1       |
| AT1G02995 | 0 | 0 | 0 | 1 | 0 | 0 | 0 | 0         | 0                | 1       |
| AT1G02996 | 0 | 0 | 0 | 1 | 0 | 0 | 0 | 0         | 0                | 1       |



Appendix Table S2

| Name      | 1  | 2  | 3  | 4  | 5  | 6  | 7  | pif45_Col | pif45bes1D_bes1D | ALL_PIF |
|-----------|----|----|----|----|----|----|----|-----------|------------------|---------|
| AT1G06137 | 0  | 0  | 0  | 0  | 0  | 0  | 0  | -1        | 0                | -1      |
| AT1G06160 | 0  | -1 | 0  | 0  | 0  | 0  | 0  | 0         | 0                | -1      |
| AT1G06180 | 0  | 0  | 0  | -1 | 0  | 0  | 0  | 0         | 0                | -1      |
| AT1G06250 | 0  | 0  | 0  | -1 | 0  | 0  | 0  | 0         | 0                | -1      |
| AT1G06265 | 0  | 0  | 0  | -1 | 0  | 0  | 0  | 0         | 0                | -1      |
| AT1G06350 | 0  | 1  | 0  | 1  | 0  | 0  | 0  | 0         | 0                | 1       |
| AT1G06460 | 0  | 0  | 0  | -1 | 0  | 0  | -1 | 0         | 0                | -1      |
| AT1G06500 | 0  | 0  | 0  | -1 | 0  | 0  | 0  | 0         | 0                | -1      |
| AT1G06560 | 0  | 0  | 0  | -1 | 0  | 0  | 0  | 0         | 0                | -1      |
| AT1G06640 | 0  | 0  | 0  | -1 | 0  | 0  | 0  | 0         | 0                | -1      |
| AT1G06650 | 0  | 0  | 0  | 0  | 0  | 0  | -1 | 0         | 0                | -1      |
| AT1G06680 | 0  | -1 | -1 | 0  | 0  | -1 | -1 | 0         | 0                | -1      |
| AT1G06830 | -1 | -1 | 0  | -1 | 0  | 0  | -1 | 0         | 0                | -1      |
| AT1G06980 | 0  | 1  | 0  | 1  | 0  | 0  | 1  | 0         | 0                | 1       |
| AT1G07010 | 0  | 0  | 0  | 0  | 0  | 0  | -1 | 0         | 0                | -1      |
| AT1G07070 | 0  | -1 | 0  | 0  | 0  | 0  | 0  | 0         | 0                | -1      |
| AT1G07090 | 1  | 0  | 0  | 1  | 0  | 0  | 1  | 0         | 0                | 1       |
| AT1G07120 | 0  | -1 | 0  | 0  | 0  | 0  | 0  | 0         | 0                | -1      |
| AT1G07180 | 0  | 0  | 0  | 0  | -1 | 0  | 0  | 0         | 0                | -1      |
| AT1G07340 | -1 | 0  | 0  | 0  | 0  | 0  | 0  | 0         | 0                | -1      |
| AT1G07370 | 0  | -1 | 0  | 0  | 0  | 0  | 0  | 0         | 0                | -1      |
| AT1G07400 | 0  | -1 | 0  | 0  | 0  | 0  | 0  | 0         | 0                | -1      |
| AT1G07420 | 0  | 0  | 0  | 1  | 0  | 0  | 1  | 0         | 0                | 1       |
| AT1G07440 | 0  | 0  | 0  | 0  | 0  | 0  | -1 | 0         | 0                | -1      |
| AT1G07700 | 0  | 0  | 0  | 0  | 0  | 0  | -1 | 0         | 0                | -1      |
| AT1G07795 | 0  | -1 | 0  | 0  | 0  | 0  | 0  | 0         | 0                | -1      |
| AT1G07880 | 0  | -1 | 0  | 0  | 0  | 0  | 0  | 0         | 0                | -1      |
| AT1G07890 | 0  | 0  | 0  | 0  | 0  | -1 | 0  | 0         | 0                | -1      |
| AT1G08105 | 0  | 0  | 0  | -1 | 0  | 0  | 0  | 0         | 0                | -1      |
| AT1G08165 | 0  | 0  | 0  | -1 | 0  | 0  | 0  | 0         | 0                | -1      |
| AT1G08180 | 0  | -1 | 0  | 0  | 0  | 0  | -1 | 0         | 0                | -1      |
| AT1G08380 | 0  | -1 | -1 | -1 | 0  | -1 | -1 | 0         | 0                | -1      |
| AT1G08500 | 0  | 0  | 0  | 1  | 0  | 0  | 1  | 0         | 0                | 1       |
| AT1G08550 | 0  | 0  | 0  | 0  | 0  | 0  | -1 | 0         | 0                | -1      |
| AT1G08580 | 0  | -1 | 0  | 0  | 0  | 0  | 0  | 0         | 0                | -1      |
| AT1G08730 | 0  | -1 | 0  | 0  | 0  | 0  | 0  | 0         | 0                | -1      |
| AT1G08810 | 0  | 0  | 0  | 0  | 0  | 0  | -1 | 0         | 0                | -1      |
| AT1G08830 | 1  | 0  | 0  | 0  | 0  | 0  | 1  | 0         | 0                | 1       |
| AT1G09190 | 0  | -1 | 0  | 0  | 0  | 0  | 0  | 0         | 0                | -1      |
| AT1G09340 | 0  | -1 | 0  | 0  | 0  | 0  | -1 | 0         | 0                | -1      |
| AT1G09415 | 0  | 0  | 0  | 0  | 0  | 0  | -1 | 0         | 0                | -1      |
| AT1G09500 | -1 | 0  | 0  | 0  | 0  | 0  | 0  | 0         | 0                | -1      |
| AT1G09530 | 0  | 1  | 0  | 0  | 0  | 0  | 1  | 0         | 0                | 1       |
| AT1G09540 | 0  | 0  | 0  | 1  | 0  | 0  | 1  | 0         | 0                | 1       |
| AT1G09610 | 0  | -1 | 0  | 0  | 0  | 0  | 0  | 0         | 0                | -1      |
| AT1G09770 | 0  | 0  | 0  | -1 | 0  | 0  | 0  | 0         | 0                | -1      |
| AT1G09995 | 0  | 0  | 0  | -1 | 0  | 0  | 0  | 0         | 0                | -1      |
| AT1G10000 | 0  | -1 | 0  | -1 | 0  | 0  | 0  | 0         | 0                | -1      |
| AT1G10140 | 0  | 0  | 0  | 1  | 0  | 1  | 0  | 0         | 0                | 1       |
| AT1G10160 | 0  | 0  | 0  | -1 | 0  | 0  | 0  | 0         | 0                | -1      |
| AT1G10270 | 0  | -1 | 0  | 0  | 0  | 0  | 0  | 0         | 0                | -1      |
| AT1G10360 | 0  | 0  | 0  | 0  | 0  | 0  | -1 | 0         | 0                | -1      |
| AT1G10470 | 0  | 0  | 0  | -1 | 0  | 0  | 0  | 0         | 0                | -1      |
| AT1G10550 | 0  | 1  | 0  | 1  | 0  | 0  | 1  | 0         | 0                | 1       |
| AT1G10560 | 0  | 1  | 0  | 1  | 0  | 0  | 0  | 0         | 0                | 1       |
| AT1G10570 | -1 | 0  | 0  | 0  | 0  | 0  | 0  | 0         | 0                | -1      |
| AT1G10640 | 0  | 0  | 0  | 0  | 0  | 0  | -1 | 0         | 0                | -1      |
| AT1G10657 | 0  | -1 | 0  | -1 | 0  | 0  | 0  | 0         | 0                | -1      |
| AT1G10810 | 0  | -1 | 0  | 0  | 0  | 0  | 0  | 0         | 0                | -1      |
| AT1G10960 | 0  | -1 | 0  | 0  | 0  | 0  | 0  | 0         | 0                | -1      |
| AT1G11070 | -1 | -1 | 0  | -1 | 0  | 0  | 0  | 0         | 0                | -1      |



Appendix Table S2

| Name      | 1  | 2  | 3  | 4  | 5  | 6  | 7  | pif45_Col | pif45bes1D_bes1D | ALL_PIF |
|-----------|----|----|----|----|----|----|----|-----------|------------------|---------|
| AT1G11112 | 0  | -1 | 0  | 0  | 0  | 0  | 0  | 0         | 0                | -1      |
| AT1G11130 | 0  | 0  | 0  | -1 | 0  | 0  | 0  | 0         | 0                | -1      |
| AT1G11150 | 0  | 0  | 0  | -1 | 0  | 0  | 0  | 0         | 0                | -1      |
| AT1G11160 | 0  | -1 | 0  | 0  | 0  | 0  | 0  | 0         | 0                | -1      |
| AT1G11210 | 1  | 0  | 0  | 1  | 0  | 0  | 1  | 0         | 0                | 1       |
| AT1G11300 | 0  | 0  | 0  | 0  | 0  | 0  | -1 | 0         | 0                | -1      |
| AT1G11320 | 0  | 0  | 0  | -1 | 0  | 0  | 0  | 0         | 0                | -1      |
| AT1G11330 | 0  | -1 | 0  | -1 | 0  | 0  | 0  | 0         | 0                | -1      |
| AT1G11340 | 0  | 0  | 0  | -1 | 0  | 0  | 0  | 0         | 0                | -1      |
| AT1G11350 | 0  | 0  | 0  | 0  | 0  | 0  | -1 | 0         | 0                | -1      |
| AT1G11490 | 0  | -1 | 0  | 0  | 0  | 0  | 0  | 0         | 0                | -1      |
| AT1G11545 | 1  | 0  | 0  | 1  | 0  | 0  | 0  | 0         | 0                | 1       |
| AT1G11580 | 0  | -1 | 0  | 0  | 0  | 0  | 0  | 0         | 0                | -1      |
| AT1G11590 | 0  | 0  | 0  | -1 | 0  | 0  | 0  | 0         | 0                | -1      |
| AT1G11610 | 0  | 0  | 0  | -1 | 0  | 0  | 0  | 0         | 0                | -1      |
| AT1G11700 | 0  | -1 | 0  | 0  | 0  | 0  | 0  | 0         | 0                | -1      |
| AT1G11720 | 0  | 0  | 0  | 0  | 0  | 0  | -1 | 0         | 0                | -1      |
| AT1G11850 | 0  | -1 | -1 | 0  | 0  | 0  | -1 | 0         | 0                | -1      |
| AT1G11960 | 0  | 1  | 0  | 1  | 0  | 0  | 0  | 0         | 0                | 1       |
| AT1G12020 | 0  | 0  | 0  | -1 | 0  | 0  | 0  | 0         | 0                | -1      |
| AT1G12080 | 1  | 1  | 0  | 1  | 0  | 0  | 0  | 0         | 0                | 1       |
| AT1G12160 | 0  | 0  | 0  | -1 | 0  | 0  | 0  | 0         | 0                | -1      |
| AT1G12220 | 0  | 0  | 0  | -1 | 0  | 0  | 0  | 0         | 0                | -1      |
| AT1G12250 | 0  | 0  | 0  | 0  | 0  | 0  | -1 | 0         | 0                | -1      |
| AT1G12340 | 0  | -1 | 0  | 0  | 0  | 0  | 0  | 0         | 0                | -1      |
| AT1G12410 | 0  | 0  | 0  | -1 | 0  | 0  | 0  | 0         | 0                | -1      |
| AT1G12460 | 0  | 0  | 0  | 0  | 0  | 0  | -1 | 0         | 0                | -1      |
| AT1G12570 | 0  | -1 | 0  | 0  | 0  | 0  | 0  | 0         | 0                | -1      |
| AT1G12740 | 0  | 0  | 0  | -1 | 0  | 0  | 0  | 0         | 0                | -1      |
| AT1G12750 | 0  | 0  | 0  | -1 | 0  | 0  | 0  | 0         | 0                | -1      |
| AT1G12845 | 0  | 0  | 0  | 1  | 0  | 0  | 1  | 0         | 0                | 1       |
| AT1G12860 | 0  | 0  | 0  | 0  | 0  | 0  | -1 | 0         | 0                | -1      |
| AT1G12900 | 0  | -1 | 0  | -1 | 0  | -1 | -1 | 0         | 0                | -1      |
| AT1G12980 | 0  | 0  | 0  | -1 | 0  | 0  | 0  | 0         | 0                | -1      |
| AT1G13080 | 0  | 0  | 0  | 0  | 0  | 0  | -1 | 0         | 0                | -1      |
| AT1G13150 | 0  | 0  | 0  | -1 | 0  | 0  | 0  | 0         | 0                | -1      |
| AT1G13245 | 0  | 0  | 0  | -1 | 0  | 0  | 0  | 0         | 0                | -1      |
| AT1G13260 | 0  | 0  | 0  | 0  | 0  | 0  | -1 | 0         | 0                | -1      |
| AT1G13270 | 0  | 0  | 0  | -1 | 0  | -1 | 0  | 0         | 0                | -1      |
| AT1G13280 | 1  | 0  | 0  | 1  | 0  | 0  | 0  | 0         | 0                | 1       |
| AT1G13300 | 0  | -1 | 0  | 0  | 0  | 0  | 0  | 0         | 0                | -1      |
| AT1G13340 | 0  | 1  | 0  | 1  | 0  | 0  | 0  | 0         | 0                | 1       |
| AT1G13410 | 0  | 0  | 0  | -1 | 0  | 0  | 0  | 0         | 0                | -1      |
| AT1G13440 | 0  | 0  | 0  | 0  | 0  | -1 | 0  | 0         | 0                | -1      |
| AT1G13480 | 0  | 0  | 0  | -1 | 0  | 0  | 0  | 0         | 0                | -1      |
| AT1G13510 | 0  | 0  | 0  | -1 | 0  | 0  | 0  | 0         | 0                | -1      |
| AT1G13520 | 0  | 0  | 0  | -1 | 0  | 0  | 0  | -1        | 0                | -1      |
| AT1G13609 | 0  | 0  | 0  | -1 | 0  | 0  | 0  | 0         | 0                | -1      |
| AT1G13620 | 0  | -1 | 0  | 0  | 0  | 0  | 0  | 0         | 0                | -1      |
| AT1G13650 | -1 | 0  | 0  | 0  | -1 | 0  | -1 | 0         | 0                | -1      |
| AT1G13700 | 0  | -1 | 0  | 0  | 0  | 0  | -1 | 0         | 0                | -1      |
| AT1G13710 | 0  | 0  | 0  | -1 | 0  | 0  | 0  | 0         | 0                | -1      |
| AT1G13750 | 0  | 0  | 0  | -1 | 0  | 0  | 0  | 0         | 0                | -1      |
| AT1G14060 | 0  | -1 | 0  | 0  | 0  | 0  | 0  | 0         | 0                | -1      |
| AT1G14071 | 0  | 0  | 0  | -1 | 0  | 0  | 0  | 0         | 0                | -1      |
| AT1G14080 | 0  | 0  | 0  | -1 | 0  | 0  | 0  | 0         | 0                | -1      |
| AT1G14150 | 0  | 0  | 0  | 0  | 0  | 0  | -1 | 0         | 0                | -1      |
| AT1G14185 | 0  | 0  | 0  | -1 | 0  | 0  | 0  | 0         | 0                | -1      |
| AT1G14260 | 0  | -1 | 0  | 0  | 0  | 0  | 0  | 0         | 0                | -1      |
| AT1G14345 | 0  | -1 | 0  | 0  | 0  | 0  | -1 | 0         | 0                | -1      |
| AT1G14350 | 1  | 1  | 0  | 1  | 0  | 0  | 0  | 0         | 0                | 1       |

Appendix Table S2

| Name      | 1  | 2  | 3  | 4  | 5 | 6  | 7  | pif45_Col | pif45bes1D_bes1D | ALL_PIF |
|-----------|----|----|----|----|---|----|----|-----------|------------------|---------|
| AT1G14430 | 0  | -1 | 0  | 0  | 0 | 0  | 0  | 0         | 0                | -1      |
| AT1G14500 | 0  | -1 | 0  | 0  | 0 | 0  | 0  | 0         | 0                | -1      |
| AT1G14520 | 0  | 1  | 0  | 1  | 0 | 0  | 0  | 0         | 0                | 1       |
| AT1G14540 | 0  | 0  | 0  | -1 | 0 | 0  | 0  | -1        | 0                | -1      |
| AT1G14550 | 0  | 0  | 0  | -1 | 0 | 0  | 0  | -1        | 0                | -1      |
| AT1G14630 | 0  | -1 | 0  | 0  | 0 | 0  | 0  | 0         | 0                | -1      |
| AT1G14640 | 0  | -1 | 0  | 0  | 0 | 0  | 0  | 0         | 0                | -1      |
| AT1G14700 | 0  | -1 | 0  | 0  | 0 | -1 | -1 | 0         | 0                | -1      |
| AT1G14930 | 0  | 1  | 0  | 0  | 0 | 0  | 1  | 0         | 0                | 1       |
| AT1G14980 | 0  | -1 | 0  | 0  | 0 | 0  | 0  | 0         | 0                | -1      |
| AT1G15010 | 0  | 1  | 0  | 0  | 0 | 0  | 1  | 0         | 0                | 1       |
| AT1G15080 | 0  | -1 | 0  | 0  | 0 | 0  | 0  | 0         | 0                | -1      |
| AT1G15125 | 0  | 0  | 0  | -1 | 0 | 0  | 0  | 0         | 0                | -1      |
| AT1G15175 | 0  | -1 | 0  | 0  | 0 | 0  | 0  | 0         | 0                | -1      |
| AT1G15180 | 0  | 0  | 0  | 0  | 0 | 0  | -1 | 0         | 0                | -1      |
| AT1G15260 | 0  | -1 | 0  | 0  | 0 | 0  | -1 | 0         | 0                | -1      |
| AT1G15290 | 0  | 0  | 0  | 0  | 0 | 0  | -1 | 0         | 0                | -1      |
| AT1G15460 | 0  | -1 | 0  | 0  | 0 | 0  | 0  | 0         | 0                | -1      |
| AT1G15480 | 0  | 0  | 0  | -1 | 0 | 0  | 0  | 0         | 0                | -1      |
| AT1G15520 | 0  | 0  | 0  | -1 | 0 | 0  | 0  | 0         | 0                | -1      |
| AT1G15580 | 0  | -1 | 0  | 0  | 0 | 0  | -1 | 0         | 0                | -1      |
| AT1G15760 | 0  | 1  | 0  | 0  | 0 | 1  | 0  | 0         | 0                | 1       |
| AT1G15790 | 0  | 0  | 0  | -1 | 0 | 0  | 0  | 0         | 0                | -1      |
| AT1G15820 | 0  | -1 | -1 | -1 | 0 | -1 | -1 | 0         | -1               | -1      |
| AT1G15825 | 0  | 0  | 0  | -1 | 0 | 0  | 0  | 0         | 0                | -1      |
| AT1G15880 | 0  | 0  | 0  | -1 | 0 | 0  | 0  | 0         | 0                | -1      |
| AT1G15885 | 0  | 0  | 0  | -1 | 0 | 0  | 0  | 0         | 0                | -1      |
| AT1G15890 | 0  | 0  | 0  | -1 | 0 | 0  | 0  | 0         | 0                | -1      |
| AT1G15960 | 0  | 0  | 0  | -1 | 0 | 0  | 0  | 0         | 0                | -1      |
| AT1G15980 | 0  | -1 | 0  | 0  | 0 | -1 | -1 | 0         | 0                | -1      |
| AT1G16090 | 0  | 0  | 0  | -1 | 0 | 0  | -1 | 0         | 0                | -1      |
| AT1G16230 | 0  | -1 | 0  | 0  | 0 | 0  | 0  | 0         | 0                | -1      |
| AT1G16260 | 0  | 0  | 0  | -1 | 0 | 0  | -1 | 0         | 0                | -1      |
| AT1G16370 | 0  | 0  | 0  | -1 | 0 | 0  | 0  | 0         | 0                | -1      |
| AT1G16445 | 0  | -1 | 0  | 0  | 0 | 0  | 0  | 0         | 0                | -1      |
| AT1G16500 | 0  | 0  | 0  | -1 | 0 | 0  | 0  | 0         | 0                | -1      |
| AT1G16510 | -1 | 0  | 0  | -1 | 0 | 0  | 0  | 0         | 0                | -1      |
| AT1G16620 | 0  | 0  | 0  | -1 | 0 | 0  | 0  | 0         | 0                | -1      |
| AT1G16720 | 0  | 0  | 0  | 0  | 0 | 0  | -1 | 0         | 0                | -1      |
| AT1G16730 | 0  | 0  | 0  | 1  | 0 | 0  | 1  | 0         | 0                | 1       |
| AT1G16850 | 0  | 1  | 0  | 1  | 0 | 1  | 1  | 0         | 0                | 1       |
| AT1G16905 | 0  | -1 | 0  | 0  | 0 | 0  | 0  | 0         | 0                | -1      |
| AT1G16910 | 0  | 0  | 0  | -1 | 0 | 0  | 0  | 0         | 0                | -1      |
| AT1G17060 | 0  | 1  | 0  | 1  | 0 | 0  | 0  | 0         | 0                | 1       |
| AT1G17090 | 0  | 0  | 0  | -1 | 0 | 0  | 0  | 0         | 0                | -1      |
| AT1G17180 | 0  | 0  | 0  | -1 | 0 | 0  | 0  | 0         | 0                | -1      |
| AT1G17200 | 0  | 0  | 0  | -1 | 0 | 0  | -1 | 0         | 0                | -1      |
| AT1G17220 | 0  | 0  | 0  | 0  | 0 | 0  | -1 | 0         | 0                | -1      |
| AT1G17240 | 0  | 0  | 0  | -1 | 0 | 0  | 0  | 0         | 0                | -1      |
| AT1G17255 | 0  | 0  | 0  | -1 | 0 | 0  | 0  | 0         | 0                | -1      |
| AT1G17300 | 0  | 1  | 0  | 1  | 0 | 0  | 0  | 0         | 0                | 1       |
| AT1G17420 | 0  | -1 | 0  | -1 | 0 | 0  | 0  | 0         | 0                | -1      |
| AT1G17430 | 0  | 1  | 0  | 1  | 0 | 1  | 0  | 0         | 0                | 1       |
| AT1G17480 | 0  | -1 | 0  | 0  | 0 | 0  | 0  | 0         | 0                | -1      |
| AT1G17590 | 1  | 0  | 0  | 1  | 0 | 0  | 0  | 0         | 0                | 1       |
| AT1G17600 | 0  | 0  | 0  | -1 | 0 | 0  | 0  | 0         | 0                | -1      |
| AT1G17610 | 0  | 0  | 0  | -1 | 0 | 0  | 0  | 0         | 0                | -1      |
| AT1G17620 | 1  | 0  | 0  | 1  | 0 | 0  | 1  | 0         | 0                | 1       |
| AT1G17650 | 0  | 0  | -1 | 0  | 0 | 0  | 0  | 0         | 0                | -1      |
| AT1G17700 | 0  | 0  | 0  | 1  | 0 | 0  | 1  | 0         | 0                | 1       |
| AT1G17810 | 0  | 1  | 1  | 1  | 0 | 0  | 1  | 0         | 0                | 1       |



Appendix Table S2

| Name      | 1  | 2  | 3  | 4  | 5  | 6  | 7  | pif45_Col | pif45bes1D_bes1D | ALL_PIF |
|-----------|----|----|----|----|----|----|----|-----------|------------------|---------|
| AT1G21880 | 0  | 0  | 0  | 0  | 0  | 0  | -1 | 0         | 0                | -1      |
| AT1G21980 | 0  | 1  | 0  | 1  | 0  | 0  | 0  | 0         | 0                | 1       |
| AT1G22220 | 0  | -1 | 0  | 0  | 0  | 0  | 0  | 0         | 0                | -1      |
| AT1G22250 | 0  | 0  | 0  | -1 | 0  | 0  | 0  | 0         | 0                | -1      |
| AT1G22400 | 0  | -1 | 0  | -1 | 0  | 0  | -1 | 0         | 0                | -1      |
| AT1G22430 | 0  | 0  | 0  | 0  | 0  | 0  | -1 | 0         | 0                | -1      |
| AT1G22470 | 0  | 1  | 0  | 1  | 0  | 0  | 0  | 0         | 0                | 1       |
| AT1G22480 | -1 | -1 | 0  | 0  | 0  | 0  | 0  | 0         | 0                | -1      |
| AT1G22530 | 0  | 0  | 0  | 1  | 0  | 0  | 1  | 1         | 0                | 1       |
| AT1G22570 | -1 | 0  | 0  | -1 | 0  | 0  | 0  | 0         | 0                | -1      |
| AT1G22590 | 0  | -1 | 0  | 0  | 0  | 0  | -1 | 0         | 0                | -1      |
| AT1G22630 | 0  | -1 | 0  | -1 | 0  | 0  | -1 | 0         | 0                | -1      |
| AT1G22650 | 0  | -1 | 0  | -1 | 0  | 0  | -1 | 0         | 0                | -1      |
| AT1G22690 | 0  | 0  | 0  | -1 | -1 | -1 | -1 | 0         | 0                | -1      |
| AT1G22710 | 0  | 0  | 0  | -1 | 0  | 0  | 0  | 0         | 0                | -1      |
| AT1G22880 | 0  | 0  | 0  | -1 | 0  | 0  | 0  | 0         | 0                | -1      |
| AT1G22885 | 0  | 0  | 0  | 0  | 0  | 0  | -1 | 0         | 0                | -1      |
| AT1G22890 | 0  | 0  | 0  | 0  | 0  | 0  | -1 | -1        | 0                | -1      |
| AT1G22900 | 0  | -1 | 0  | 0  | 0  | 0  | 0  | 0         | 0                | -1      |
| AT1G22980 | 0  | -1 | 0  | 0  | 0  | 0  | 0  | 0         | 0                | -1      |
| AT1G23010 | 0  | 0  | 0  | -1 | 0  | 0  | 0  | 0         | 0                | -1      |
| AT1G23020 | 0  | 0  | 0  | -1 | 0  | 0  | 0  | 0         | 0                | -1      |
| AT1G23060 | 0  | 0  | 0  | 1  | 0  | 0  | 1  | 0         | 0                | 1       |
| AT1G23100 | 0  | -1 | 0  | 0  | 0  | 0  | 0  | 0         | 0                | -1      |
| AT1G23130 | 0  | -1 | 0  | -1 | -1 | -1 | -1 | -1        | 0                | -1      |
| AT1G23205 | 0  | 0  | 0  | 0  | 0  | 0  | -1 | 0         | 0                | -1      |
| AT1G23310 | 0  | 0  | 0  | 0  | 0  | 0  | -1 | 0         | 0                | -1      |
| AT1G23360 | 0  | 0  | 0  | -1 | 0  | 0  | 0  | 0         | 0                | -1      |
| AT1G23390 | 0  | 0  | 0  | 0  | 0  | 0  | -1 | 0         | 0                | -1      |
| AT1G23410 | 0  | -1 | 0  | -1 | 0  | 0  | 0  | 0         | 0                | -1      |
| AT1G23450 | 0  | 0  | 0  | -1 | 0  | 0  | 0  | 0         | 0                | -1      |
| AT1G23480 | 0  | 0  | 0  | 0  | 0  | 0  | -1 | 0         | 0                | -1      |
| AT1G23730 | 0  | 0  | 0  | -1 | 0  | 0  | 0  | 0         | 0                | -1      |
| AT1G23790 | 0  | -1 | 0  | 0  | 0  | 0  | 0  | 0         | 0                | -1      |
| AT1G24020 | 0  | -1 | -1 | -1 | 0  | -1 | -1 | 0         | 0                | -1      |
| AT1G24070 | 0  | -1 | 0  | 0  | 0  | 0  | 0  | 0         | 0                | -1      |
| AT1G24090 | 0  | -1 | 0  | 0  | 0  | 0  | 0  | 0         | 0                | -1      |
| AT1G24140 | 0  | 0  | 0  | 0  | 0  | 0  | 0  | -1        | 0                | -1      |
| AT1G24145 | 0  | 0  | 0  | -1 | 0  | 0  | 0  | 0         | 0                | -1      |
| AT1G24260 | 0  | 0  | 0  | -1 | 0  | 0  | 0  | 0         | 0                | -1      |
| AT1G24280 | 0  | -1 | 0  | 0  | 0  | 0  | 0  | 0         | 0                | -1      |
| AT1G24320 | 0  | 0  | 0  | -1 | 0  | 0  | 0  | 0         | 0                | -1      |
| AT1G24530 | 0  | -1 | 0  | -1 | 0  | 0  | -1 | 0         | 0                | -1      |
| AT1G24577 | 0  | -1 | 0  | 0  | 0  | 0  | 0  | 0         | 0                | -1      |
| AT1G24580 | 0  | -1 | 0  | 0  | 0  | 0  | 0  | 0         | 0                | -1      |
| AT1G24792 | 0  | 0  | 0  | -1 | 0  | 0  | 0  | 0         | 0                | -1      |
| AT1G24793 | 0  | 0  | 0  | -1 | 0  | 0  | 0  | 0         | 0                | -1      |
| AT1G24879 | 0  | 0  | 0  | -1 | 0  | 0  | 0  | 0         | 0                | -1      |
| AT1G24880 | 0  | 0  | 0  | -1 | 0  | 0  | 0  | 0         | 0                | -1      |
| AT1G24909 | 0  | 0  | 0  | 0  | 0  | 0  | 0  | -1        | -1               | -1      |
| AT1G24996 | 0  | 0  | 0  | -1 | 0  | 0  | 0  | 0         | 0                | -1      |
| AT1G25053 | 0  | 0  | 0  | -1 | 0  | 0  | 0  | 0         | 0                | -1      |
| AT1G25210 | 0  | 0  | 0  | -1 | 0  | 0  | 0  | 0         | 0                | -1      |
| AT1G25275 | 0  | 0  | 0  | 0  | 0  | 0  | 0  | -1        | 0                | -1      |
| AT1G25440 | 0  | -1 | 0  | -1 | 0  | 0  | 0  | 0         | 0                | -1      |
| AT1G25510 | 0  | -1 | 0  | 0  | 0  | 0  | 0  | 0         | 0                | -1      |
| AT1G25560 | 0  | 0  | 0  | 0  | 0  | 0  | -1 | 0         | 0                | -1      |
| AT1G26150 | 0  | 0  | 0  | -1 | 0  | 0  | 0  | 0         | 0                | -1      |
| AT1G26220 | 0  | 0  | 0  | 0  | 0  | 0  | -1 | 0         | 0                | -1      |
| AT1G26240 | 0  | 0  | 0  | -1 | 0  | 0  | 0  | 0         | 0                | -1      |
| AT1G26290 | 0  | 1  | 0  | 0  | 0  | 0  | 1  | 0         | 0                | 1       |



Appendix Table S2

| Name      | 1  | 2  | 3  | 4  | 5 | 6  | 7  | pif45_Col | pif45bes1D_bes1D | ALL_PIF |
|-----------|----|----|----|----|---|----|----|-----------|------------------|---------|
| AT1G30720 | 0  | 1  | 0  | 1  | 0 | 0  | 0  | 0         | 0                | 1       |
| AT1G30730 | 0  | 1  | 0  | 1  | 0 | 0  | 0  | 0         | 0                | 1       |
| AT1G30750 | 0  | 0  | 0  | 1  | 0 | 0  | 1  | 0         | 0                | 1       |
| AT1G30760 | 0  | 1  | 0  | 1  | 0 | 0  | 0  | 0         | 0                | 1       |
| AT1G30835 | 0  | 0  | 0  | -1 | 0 | 0  | 0  | 0         | 0                | -1      |
| AT1G31200 | 0  | -1 | 0  | 0  | 0 | 0  | 0  | 0         | 0                | -1      |
| AT1G31330 | 0  | -1 | -1 | 0  | 0 | -1 | -1 | 0         | 0                | -1      |
| AT1G31335 | 0  | 0  | 0  | 0  | 0 | 0  | -1 | 0         | 0                | -1      |
| AT1G31355 | 0  | 0  | 0  | -1 | 0 | 0  | 0  | 0         | 0                | -1      |
| AT1G31360 | 0  | 0  | 0  | 0  | 0 | 0  | 0  | -1        | 0                | -1      |
| AT1G31430 | 0  | 0  | 0  | -1 | 0 | 0  | 0  | 0         | 0                | -1      |
| AT1G31550 | 0  | -1 | 0  | -1 | 0 | 0  | 0  | 0         | 0                | -1      |
| AT1G31600 | 0  | 0  | 0  | -1 | 0 | 0  | 0  | 0         | 0                | -1      |
| AT1G31660 | 0  | -1 | 0  | 0  | 0 | 0  | 0  | 0         | 0                | -1      |
| AT1G31710 | 0  | -1 | 0  | 0  | 0 | 0  | 0  | 0         | 0                | -1      |
| AT1G31790 | 0  | 0  | 0  | -1 | 0 | 0  | 0  | 0         | 0                | -1      |
| AT1G31814 | 0  | 0  | 0  | -1 | 0 | 0  | 0  | 0         | 0                | -1      |
| AT1G31820 | 0  | -1 | 0  | -1 | 0 | 0  | 0  | 0         | 0                | -1      |
| AT1G31835 | 0  | -1 | 0  | -1 | 0 | 0  | 0  | 0         | 0                | -1      |
| AT1G31840 | 0  | 0  | 0  | -1 | 0 | 0  | 0  | 0         | 0                | -1      |
| AT1G31900 | 0  | 0  | 0  | -1 | 0 | 0  | 0  | 0         | 0                | -1      |
| AT1G31920 | 0  | 0  | 0  | 0  | 0 | 0  | -1 | 0         | 0                | -1      |
| AT1G32090 | 0  | 0  | 0  | 1  | 0 | 0  | 1  | 0         | 0                | 1       |
| AT1G32100 | 0  | 0  | 0  | 1  | 0 | 0  | 0  | 1         | 0                | 1       |
| AT1G32170 | 0  | 1  | 0  | 1  | 0 | 0  | 0  | 0         | 0                | 1       |
| AT1G32172 | 0  | 0  | 0  | -1 | 0 | 0  | 0  | 0         | 0                | -1      |
| AT1G32270 | 0  | 0  | 0  | -1 | 0 | 0  | 0  | 0         | 0                | -1      |
| AT1G32350 | 0  | 0  | 0  | -1 | 0 | 0  | 0  | 0         | 0                | -1      |
| AT1G32520 | 0  | 0  | 0  | 0  | 0 | 0  | -1 | 0         | 0                | -1      |
| AT1G32540 | 0  | 0  | 0  | 0  | 0 | 0  | -1 | 0         | 0                | -1      |
| AT1G32583 | 0  | 0  | 0  | -1 | 0 | 0  | 0  | 0         | 0                | -1      |
| AT1G32640 | 0  | 0  | 0  | 1  | 0 | 0  | 1  | 0         | 0                | 1       |
| AT1G32860 | 0  | 0  | 0  | -1 | 0 | 0  | 0  | 0         | 0                | -1      |
| AT1G32900 | 0  | -1 | 0  | 0  | 0 | 0  | -1 | 0         | 0                | -1      |
| AT1G32940 | 0  | 0  | 0  | -1 | 0 | 0  | 0  | 0         | 0                | -1      |
| AT1G32950 | 0  | 0  | 0  | -1 | 0 | 0  | 0  | 0         | 0                | -1      |
| AT1G33030 | 0  | 0  | 0  | -1 | 0 | 0  | 0  | 0         | 0                | -1      |
| AT1G33080 | 0  | 0  | 0  | -1 | 0 | 0  | 0  | 0         | 0                | -1      |
| AT1G33110 | 0  | 0  | 0  | 0  | 0 | 0  | -1 | 0         | 0                | -1      |
| AT1G33350 | 0  | 0  | 0  | -1 | 0 | 0  | 0  | 0         | 0                | -1      |
| AT1G33590 | 0  | -1 | -1 | 0  | 0 | -1 | -1 | 0         | 0                | -1      |
| AT1G33600 | 0  | -1 | 0  | -1 | 0 | -1 | -1 | 0         | 0                | -1      |
| AT1G33720 | 0  | 0  | 0  | -1 | 0 | 0  | 0  | 0         | 0                | -1      |
| AT1G33790 | 0  | 0  | 0  | -1 | 0 | 0  | 0  | 0         | 0                | -1      |
| AT1G33811 | 0  | -1 | 0  | 0  | 0 | 0  | -1 | 0         | 0                | -1      |
| AT1G33813 | 0  | 0  | 0  | -1 | 0 | 0  | 0  | 0         | 0                | -1      |
| AT1G33840 | 0  | 0  | 0  | -1 | 0 | 0  | 0  | 0         | 0                | -1      |
| AT1G33950 | 0  | 0  | 0  | -1 | 0 | 0  | 0  | 0         | 0                | -1      |
| AT1G33960 | 0  | 0  | 0  | -1 | 0 | 0  | 0  | 0         | 0                | -1      |
| AT1G34000 | 0  | 0  | 0  | 0  | 0 | 0  | -1 | 0         | 0                | -1      |
| AT1G34040 | 0  | 0  | 0  | -1 | 0 | 0  | 0  | 0         | 0                | -1      |
| AT1G34050 | 0  | 0  | 0  | -1 | 0 | 0  | 0  | 0         | 0                | -1      |
| AT1G34110 | 0  | 1  | 0  | 0  | 0 | 1  | 0  | 0         | 0                | 1       |
| AT1G34245 | 0  | -1 | 0  | -1 | 0 | 0  | -1 | 0         | 0                | -1      |
| AT1G34315 | 0  | 0  | 0  | -1 | 0 | 0  | 0  | 0         | 0                | -1      |
| AT1G34360 | 0  | -1 | 0  | 0  | 0 | 0  | 0  | 0         | 0                | -1      |
| AT1G34420 | 0  | 0  | 0  | -1 | 0 | 0  | 0  | 0         | 0                | -1      |
| AT1G34570 | 0  | -1 | 0  | 0  | 0 | 0  | 0  | 0         | 0                | -1      |
| AT1G34630 | 0  | 1  | 0  | 0  | 0 | 1  | 1  | 0         | 0                | 1       |
| AT1G34760 | -1 | 0  | 0  | 0  | 0 | 0  | 0  | 0         | 0                | -1      |
| AT1G34780 | 0  | 0  | 0  | -1 | 0 | 0  | 0  | 0         | 0                | -1      |

Appendix Table S2

| Name      | 1  | 2  | 3 | 4  | 5 | 6  | 7  | pif45_Col | pif45bes1D_bes1D | ALL_PIF |
|-----------|----|----|---|----|---|----|----|-----------|------------------|---------|
| AT1G34844 | 0  | 0  | 0 | -1 | 0 | 0  | 0  | 0         | 0                | -1      |
| AT1G35112 | 0  | 0  | 0 | -1 | 0 | 0  | 0  | 0         | 0                | -1      |
| AT1G35140 | 0  | 0  | 0 | -1 | 0 | 0  | 0  | 0         | 0                | -1      |
| AT1G35170 | 0  | 0  | 0 | -1 | 0 | 0  | 0  | 0         | 0                | -1      |
| AT1G35180 | 0  | 0  | 0 | -1 | 0 | 0  | 0  | 0         | 0                | -1      |
| AT1G35210 | 0  | 0  | 0 | 0  | 0 | 0  | 0  | -1        | 0                | -1      |
| AT1G35290 | 0  | -1 | 0 | 0  | 0 | 0  | -1 | 0         | 0                | -1      |
| AT1G35310 | 0  | -1 | 0 | 0  | 0 | 0  | 0  | 0         | 0                | -1      |
| AT1G35320 | 0  | 0  | 0 | -1 | 0 | 0  | 0  | 0         | 0                | -1      |
| AT1G35330 | 0  | 0  | 0 | -1 | 0 | 0  | 0  | 0         | 0                | -1      |
| AT1G35340 | 0  | 0  | 0 | 0  | 0 | 0  | -1 | 0         | 0                | -1      |
| AT1G35420 | 0  | 0  | 0 | 0  | 0 | 0  | -1 | 0         | 0                | -1      |
| AT1G35560 | 0  | 0  | 0 | -1 | 0 | 0  | 0  | 0         | 0                | -1      |
| AT1G35612 | 0  | 0  | 0 | -1 | 0 | 0  | -1 | 0         | 0                | -1      |
| AT1G35625 | 0  | 0  | 0 | -1 | 0 | 0  | 0  | 0         | 0                | -1      |
| AT1G35720 | 1  | 0  | 0 | 1  | 0 | 0  | 1  | 0         | 0                | 1       |
| AT1G35830 | 0  | 0  | 0 | -1 | 0 | 0  | 0  | 0         | 0                | -1      |
| AT1G35910 | 0  | 1  | 0 | 1  | 0 | 0  | 0  | 0         | 0                | 1       |
| AT1G36640 | 0  | 0  | 0 | 0  | 0 | 0  | 0  | -1        | 0                | -1      |
| AT1G37130 | 0  | -1 | 0 | -1 | 0 | -1 | -1 | 0         | 0                | -1      |
| AT1G41880 | 0  | 0  | 0 | 0  | 0 | -1 | 0  | 0         | 0                | -1      |
| AT1G42350 | 0  | 0  | 0 | -1 | 0 | 0  | 0  | 0         | 0                | -1      |
| AT1G42560 | -1 | 0  | 0 | 0  | 0 | 0  | 0  | 0         | 0                | -1      |
| AT1G42970 | 0  | 0  | 0 | 0  | 0 | 0  | -1 | 0         | 0                | -1      |
| AT1G43160 | 0  | 0  | 0 | -1 | 0 | 0  | 0  | 0         | 0                | -1      |
| AT1G43170 | 0  | -1 | 0 | 0  | 0 | 0  | 0  | 0         | 0                | -1      |
| AT1G43560 | 0  | -1 | 0 | 0  | 0 | 0  | 0  | 0         | 0                | -1      |
| AT1G43590 | 0  | 0  | 0 | 0  | 0 | 0  | -1 | 0         | 0                | -1      |
| AT1G43670 | 0  | 0  | 0 | 0  | 0 | 0  | -1 | 0         | 0                | -1      |
| AT1G43775 | 0  | 0  | 0 | -1 | 0 | 0  | 0  | 0         | 0                | -1      |
| AT1G43780 | 0  | -1 | 0 | 0  | 0 | 0  | -1 | 0         | 0                | -1      |
| AT1G44000 | 0  | -1 | 0 | 0  | 0 | 0  | -1 | 0         | 0                | -1      |
| AT1G44446 | 0  | -1 | 0 | -1 | 0 | -1 | -1 | 0         | 0                | -1      |
| AT1G44790 | 0  | 0  | 0 | 0  | 0 | 0  | -1 | 0         | 0                | -1      |
| AT1G44830 | 0  | 1  | 0 | 1  | 0 | 0  | 1  | 0         | 0                | 1       |
| AT1G44970 | 0  | 0  | 0 | 1  | 0 | 0  | 1  | 0         | 0                | 1       |
| AT1G45110 | 0  | 0  | 0 | -1 | 0 | 0  | 0  | 0         | 0                | -1      |
| AT1G45130 | 1  | 1  | 0 | 1  | 0 | 0  | 1  | 0         | 0                | 1       |
| AT1G45201 | 0  | -1 | 0 | -1 | 0 | 0  | 0  | 0         | 0                | -1      |
| AT1G45474 | 0  | 0  | 0 | 0  | 0 | 0  | -1 | 0         | 0                | -1      |
| AT1G47395 | 0  | 0  | 0 | -1 | 0 | 0  | 0  | 0         | 0                | -1      |
| AT1G47400 | 0  | 0  | 0 | -1 | 0 | 0  | 0  | 0         | 0                | -1      |
| AT1G47480 | 0  | 0  | 0 | 1  | 0 | 0  | 1  | 0         | 0                | 1       |
| AT1G47540 | 0  | 0  | 0 | -1 | 0 | 0  | 0  | 0         | 0                | -1      |
| AT1G47610 | 0  | 0  | 0 | 1  | 0 | 0  | 0  | 1         | 0                | 1       |
| AT1G47620 | 0  | -1 | 0 | 0  | 0 | 0  | 0  | 0         | 0                | -1      |
| AT1G47630 | 0  | 1  | 0 | 1  | 0 | 0  | 0  | 0         | 0                | 1       |
| AT1G47820 | 0  | -1 | 0 | 0  | 0 | 0  | 0  | 0         | 0                | -1      |
| AT1G47890 | 0  | 0  | 0 | 0  | 0 | 0  | 0  | 0         | -1               | -1      |
| AT1G48280 | 0  | 0  | 0 | 0  | 0 | 0  | -1 | 0         | 0                | -1      |
| AT1G48630 | 0  | -1 | 0 | 0  | 0 | 0  | 0  | 0         | 0                | -1      |
| AT1G48820 | 0  | 1  | 0 | 0  | 0 | 1  | 0  | 0         | 0                | 1       |
| AT1G49010 | 0  | 0  | 0 | 0  | 0 | 0  | -1 | 0         | 0                | -1      |
| AT1G49030 | 0  | 0  | 0 | -1 | 0 | 0  | 0  | 0         | 0                | -1      |
| AT1G49200 | 0  | 0  | 0 | -1 | 0 | 0  | -1 | 0         | 0                | -1      |
| AT1G49220 | 0  | 0  | 0 | -1 | 0 | 0  | 0  | 0         | 0                | -1      |
| AT1G49410 | 0  | -1 | 0 | 0  | 0 | 0  | 0  | 0         | 0                | -1      |
| AT1G49430 | 0  | 0  | 0 | 0  | 0 | 0  | -1 | 0         | 0                | -1      |
| AT1G49450 | 0  | -1 | 0 | 0  | 0 | 0  | 0  | 0         | 0                | -1      |
| AT1G49500 | 0  | 0  | 0 | 0  | 0 | 0  | -1 | 0         | 0                | -1      |
| AT1G49570 | 0  | 1  | 0 | 0  | 0 | 1  | 0  | 0         | 0                | 1       |

Appendix Table S2

| Name      | 1  | 2  | 3  | 4  | 5 | 6  | 7  | pif45_Col | pif45bes1D_bes1D | ALL_PIF |
|-----------|----|----|----|----|---|----|----|-----------|------------------|---------|
| AT1G49700 | 0  | -1 | 0  | 0  | 0 | 0  | 0  | 0         | 0                | -1      |
| AT1G49750 | 0  | -1 | 0  | 0  | 0 | 0  | -1 | 0         | 0                | -1      |
| AT1G49860 | 0  | 0  | 0  | -1 | 0 | 0  | 0  | 0         | 0                | -1      |
| AT1G49920 | 0  | -1 | 0  | 0  | 0 | 0  | 0  | 0         | 0                | -1      |
| AT1G49975 | 0  | 0  | 0  | 0  | 0 | 0  | -1 | 0         | 0                | -1      |
| AT1G49990 | 0  | -1 | 0  | 0  | 0 | 0  | 0  | 0         | 0                | -1      |
| AT1G50055 | 0  | -1 | 0  | 0  | 0 | 0  | 0  | 0         | 0                | -1      |
| AT1G50060 | 0  | -1 | 0  | 0  | 0 | 0  | 0  | 0         | 0                | -1      |
| AT1G50090 | 0  | -1 | 0  | 0  | 0 | 0  | 0  | 0         | 0                | -1      |
| AT1G50180 | 0  | 0  | 0  | -1 | 0 | 0  | 0  | 0         | 0                | -1      |
| AT1G50280 | 0  | -1 | 0  | -1 | 0 | 0  | 0  | 0         | 0                | -1      |
| AT1G50320 | -1 | 0  | 0  | 0  | 0 | 0  | -1 | 0         | 0                | -1      |
| AT1G50490 | 0  | -1 | 0  | 0  | 0 | 0  | 0  | 0         | 0                | -1      |
| AT1G50580 | 0  | 0  | 0  | -1 | 0 | 0  | 0  | 0         | 0                | -1      |
| AT1G50730 | 0  | 0  | 0  | 0  | 0 | 0  | -1 | 0         | 0                | -1      |
| AT1G50732 | 0  | -1 | 0  | 0  | 0 | 0  | 0  | 0         | 0                | -1      |
| AT1G51080 | 0  | -1 | 0  | 0  | 0 | 0  | 0  | 0         | 0                | -1      |
| AT1G51100 | 0  | 0  | 0  | 0  | 0 | 0  | -1 | 0         | 0                | -1      |
| AT1G51110 | 0  | 0  | 0  | 0  | 0 | 0  | -1 | 0         | 0                | -1      |
| AT1G51190 | 0  | 0  | 0  | -1 | 0 | 0  | 0  | 0         | 0                | -1      |
| AT1G51270 | 0  | 0  | 0  | -1 | 0 | 0  | 0  | 0         | 0                | -1      |
| AT1G51380 | 0  | -1 | 0  | 0  | 0 | 0  | 0  | 0         | 0                | -1      |
| AT1G51400 | 0  | -1 | 0  | 0  | 0 | 0  | -1 | 0         | 0                | -1      |
| AT1G51430 | 0  | 0  | 0  | 0  | 0 | 0  | -1 | 0         | 0                | -1      |
| AT1G51700 | 0  | 0  | 0  | 0  | 0 | 0  | -1 | 0         | 0                | -1      |
| AT1G51805 | 0  | -1 | -1 | -1 | 0 | -1 | -1 | -1        | 0                | -1      |
| AT1G51913 | 0  | 0  | 0  | -1 | 0 | 0  | 0  | 0         | 0                | -1      |
| AT1G51920 | 0  | 0  | 0  | 0  | 0 | 0  | 0  | -1        | 0                | -1      |
| AT1G52050 | 0  | -1 | 0  | 0  | 0 | 0  | 0  | 0         | 0                | -1      |
| AT1G52060 | 0  | -1 | 0  | 0  | 0 | 0  | 0  | 0         | 0                | -1      |
| AT1G52070 | 0  | -1 | 0  | 0  | 0 | 0  | -1 | 0         | 0                | -1      |
| AT1G52100 | 0  | -1 | -1 | -1 | 0 | 0  | -1 | 0         | 0                | -1      |
| AT1G52190 | 1  | 0  | 0  | 0  | 1 | 0  | 0  | 0         | 0                | 1       |
| AT1G52220 | 0  | -1 | 0  | 0  | 0 | 0  | -1 | 0         | 0                | -1      |
| AT1G52230 | 0  | -1 | -1 | -1 | 0 | -1 | -1 | 0         | -1               | -1      |
| AT1G52270 | 0  | -1 | 0  | 0  | 0 | 0  | 0  | -1        | 0                | -1      |
| AT1G52290 | 1  | 0  | 0  | 1  | 0 | 0  | 0  | 0         | 0                | 1       |
| AT1G52400 | 0  | -1 | 0  | -1 | 0 | 0  | 0  | 0         | 0                | -1      |
| AT1G52750 | 0  | 1  | 0  | 1  | 0 | 0  | 0  | 0         | 0                | 1       |
| AT1G52770 | 0  | -1 | 0  | 0  | 0 | 0  | 0  | 0         | 0                | -1      |
| AT1G52830 | 1  | 1  | 0  | 1  | 1 | 0  | 0  | 0         | 0                | 1       |
| AT1G52870 | 0  | 0  | 0  | 0  | 0 | 0  | -1 | 0         | 0                | -1      |
| AT1G52905 | 0  | 0  | 0  | -1 | 0 | 0  | 0  | 0         | 0                | -1      |
| AT1G52930 | 0  | -1 | 0  | 0  | 0 | 0  | 0  | 0         | 0                | -1      |
| AT1G53060 | 0  | -1 | 0  | 0  | 0 | 0  | 0  | 0         | 0                | -1      |
| AT1G53070 | 0  | -1 | 0  | 0  | 0 | 0  | 0  | 0         | 0                | -1      |
| AT1G53080 | 0  | 1  | 0  | 1  | 0 | 0  | 1  | 0         | 0                | 1       |
| AT1G53130 | 0  | -1 | 0  | 0  | 0 | 0  | 0  | 0         | 0                | -1      |
| AT1G53230 | 0  | 0  | 0  | 0  | 0 | 0  | -1 | 0         | 0                | -1      |
| AT1G53470 | 0  | 1  | 0  | 1  | 0 | 0  | 0  | 0         | 0                | 1       |
| AT1G53520 | 0  | -1 | 0  | 0  | 0 | 0  | -1 | 0         | 0                | -1      |
| AT1G53625 | 0  | 0  | 0  | -1 | 0 | 0  | 0  | 0         | 0                | -1      |
| AT1G53635 | 0  | -1 | 0  | 0  | 0 | 0  | 0  | 0         | 0                | -1      |
| AT1G53670 | 0  | 0  | 0  | 0  | 0 | 0  | -1 | 0         | 0                | -1      |
| AT1G53680 | 0  | -1 | 0  | 0  | 0 | 0  | 0  | 0         | 0                | -1      |
| AT1G53690 | 0  | 0  | 0  | 1  | 0 | 1  | 1  | 0         | 0                | 1       |
| AT1G53700 | 0  | 1  | 0  | 1  | 0 | 0  | 1  | 0         | 0                | 1       |
| AT1G53708 | 0  | -1 | 0  | 0  | 0 | 0  | 0  | 0         | 0                | -1      |
| AT1G53830 | 0  | 0  | 1  | 1  | 0 | 0  | 1  | 0         | 0                | 1       |
| AT1G53920 | 0  | 0  | 0  | -1 | 0 | 0  | 0  | 0         | 0                | -1      |
| AT1G53990 | 0  | 0  | 0  | 0  | 0 | 0  | 0  | -1        | 0                | -1      |



Appendix Table S2

| Name      | 1  | 2  | 3  | 4  | 5 | 6  | 7  | pif45_Col | pif45bes1D_bes1D | ALL_PIF |
|-----------|----|----|----|----|---|----|----|-----------|------------------|---------|
| AT1G54000 | 0  | -1 | 0  | -1 | 0 | 0  | -1 | 0         | 0                | -1      |
| AT1G54010 | 0  | 0  | 0  | -1 | 0 | -1 | 0  | 0         | 0                | -1      |
| AT1G54020 | 0  | -1 | 0  | 0  | 0 | 0  | 0  | 0         | 0                | -1      |
| AT1G54050 | 0  | -1 | 0  | 0  | 0 | 0  | -1 | 0         | 0                | -1      |
| AT1G54200 | 1  | 0  | 0  | 1  | 0 | 0  | 0  | 0         | 0                | 1       |
| AT1G54350 | 0  | 0  | 0  | 0  | 0 | 0  | -1 | 0         | 0                | -1      |
| AT1G54500 | 0  | 0  | 0  | 0  | 0 | 0  | -1 | 0         | 0                | -1      |
| AT1G54540 | 0  | -1 | 0  | 0  | 0 | 0  | 0  | 0         | 0                | -1      |
| AT1G54740 | 0  | 0  | 0  | 0  | 0 | 0  | -1 | 0         | 0                | -1      |
| AT1G54780 | 0  | 0  | 0  | 0  | 0 | 0  | -1 | 0         | 0                | -1      |
| AT1G54820 | 0  | -1 | 0  | -1 | 0 | -1 | -1 | 0         | 0                | -1      |
| AT1G54860 | 0  | 0  | 0  | 1  | 0 | 0  | 1  | 0         | 0                | 1       |
| AT1G54870 | 0  | 1  | 0  | 0  | 0 | 0  | 1  | 0         | 0                | 1       |
| AT1G54890 | 0  | 0  | 0  | -1 | 0 | 0  | 0  | 0         | 0                | -1      |
| AT1G54950 | 0  | 0  | 0  | -1 | 0 | 0  | 0  | 0         | 0                | -1      |
| AT1G55200 | 0  | -1 | 0  | -1 | 0 | 0  | -1 | 0         | 0                | -1      |
| AT1G55205 | 0  | -1 | 0  | 0  | 0 | 0  | 0  | 0         | 0                | -1      |
| AT1G55370 | 0  | 0  | 0  | 0  | 0 | 0  | -1 | 0         | 0                | -1      |
| AT1G55480 | 0  | 0  | 0  | 0  | 0 | 0  | -1 | 0         | 0                | -1      |
| AT1G55490 | 0  | 0  | 0  | 0  | 0 | -1 | 0  | 0         | 0                | -1      |
| AT1G55670 | 0  | -1 | 0  | -1 | 0 | -1 | -1 | 0         | 0                | -1      |
| AT1G55760 | 0  | 0  | 0  | 0  | 0 | 0  | -1 | 0         | 0                | -1      |
| AT1G55850 | 0  | 0  | 0  | 0  | 0 | 0  | -1 | 0         | 0                | -1      |
| AT1G55910 | 0  | -1 | 0  | 0  | 0 | 0  | -1 | 0         | 0                | -1      |
| AT1G55920 | 0  | 0  | 0  | 0  | 0 | 0  | -1 | 0         | 0                | -1      |
| AT1G56050 | 0  | 0  | -1 | 0  | 0 | 0  | 0  | 0         | 0                | -1      |
| AT1G56110 | 0  | -1 | 0  | 0  | 0 | 0  | 0  | 0         | 0                | -1      |
| AT1G56240 | 0  | 0  | 0  | 0  | 0 | 0  | 0  | -1        | 0                | -1      |
| AT1G56250 | 0  | 0  | 0  | -1 | 0 | 0  | 0  | 0         | 0                | -1      |
| AT1G56300 | 0  | 1  | 0  | 0  | 0 | 0  | 1  | 0         | 0                | 1       |
| AT1G56320 | 0  | -1 | 0  | 0  | 0 | 0  | 0  | 0         | 0                | -1      |
| AT1G56430 | 0  | -1 | 0  | -1 | 0 | 0  | 0  | 0         | 0                | -1      |
| AT1G56500 | 0  | 0  | 0  | 0  | 0 | 0  | -1 | 0         | 0                | -1      |
| AT1G56510 | 0  | 0  | 0  | -1 | 0 | 0  | 0  | -1        | -1               | -1      |
| AT1G56540 | 0  | 1  | 0  | 1  | 0 | 0  | 0  | 0         | 0                | 1       |
| AT1G56630 | 0  | -1 | 0  | 0  | 0 | 0  | 0  | 0         | 0                | -1      |
| AT1G56660 | 0  | 1  | 0  | 1  | 0 | 0  | 0  | 0         | 0                | 1       |
| AT1G56680 | 0  | -1 | 0  | 0  | 0 | 0  | 0  | 0         | 0                | -1      |
| AT1G56690 | 0  | 0  | 0  | -1 | 0 | 0  | 0  | 0         | 0                | -1      |
| AT1G57570 | 0  | 1  | 0  | 1  | 0 | 0  | 0  | 0         | 0                | 1       |
| AT1G57590 | 0  | -1 | 0  | 0  | 0 | 0  | 0  | 0         | 0                | -1      |
| AT1G57660 | 0  | -1 | 0  | 0  | 0 | 0  | 0  | 0         | 0                | -1      |
| AT1G57750 | 0  | -1 | 0  | 0  | 0 | 0  | 0  | 0         | 0                | -1      |
| AT1G57860 | 0  | -1 | 0  | 0  | 0 | 0  | 0  | 0         | 0                | -1      |
| AT1G57980 | 0  | -1 | 0  | 0  | 0 | 0  | 0  | 0         | 0                | -1      |
| AT1G58150 | 0  | 0  | 0  | 0  | 0 | 0  | -1 | 0         | 0                | -1      |
| AT1G58170 | 0  | -1 | 0  | 0  | 0 | 0  | 0  | 0         | 0                | -1      |
| AT1G58290 | 0  | -1 | -1 | -1 | 0 | -1 | -1 | 0         | 0                | -1      |
| AT1G58320 | 0  | 0  | 0  | -1 | 0 | 0  | 0  | 0         | 0                | -1      |
| AT1G58340 | 0  | -1 | 0  | -1 | 0 | 0  | 0  | 0         | 0                | -1      |
| AT1G58410 | 0  | 1  | 0  | 0  | 0 | 1  | 0  | 0         | 0                | 1       |
| AT1G58460 | 0  | -1 | 0  | 0  | 0 | 0  | 0  | 0         | 0                | -1      |
| AT1G58561 | 0  | 0  | 0  | -1 | 0 | 0  | 0  | 0         | 0                | -1      |
| AT1G58725 | 0  | 0  | 0  | -1 | 0 | 0  | 0  | 0         | 0                | -1      |
| AT1G58848 | -1 | 0  | 0  | 0  | 0 | 0  | 0  | 0         | 0                | -1      |
| AT1G59030 | 0  | 0  | 0  | -1 | 0 | -1 | 0  | 0         | 0                | -1      |
| AT1G59124 | -1 | 0  | 0  | 0  | 0 | 0  | 0  | 0         | 0                | -1      |
| AT1G59406 | 0  | 0  | 0  | -1 | 0 | 0  | 0  | 0         | 0                | -1      |
| AT1G59540 | 0  | -1 | 0  | 0  | 0 | 0  | 0  | 0         | 0                | -1      |
| AT1G59730 | 0  | -1 | 0  | 0  | 0 | 0  | 0  | 0         | 0                | -1      |
| AT1G59940 | 0  | 0  | 0  | -1 | 0 | 0  | 0  | 0         | 0                | -1      |

Appendix Table S2

| Name      | 1  | 2  | 3 | 4  | 5 | 6  | 7  | pif45_Col | pif45bes1D_bes1D | ALL_PIF |
|-----------|----|----|---|----|---|----|----|-----------|------------------|---------|
| AT1G59960 | 0  | 0  | 0 | -1 | 0 | 0  | 0  | 0         | 0                | -1      |
| AT1G60000 | 0  | -1 | 0 | -1 | 0 | 0  | -1 | 0         | 0                | -1      |
| AT1G60060 | 0  | 1  | 0 | 1  | 0 | 1  | 1  | 0         | 0                | 1       |
| AT1G60190 | 1  | 0  | 0 | 1  | 0 | 0  | 0  | 0         | 0                | 1       |
| AT1G60260 | 0  | -1 | 0 | 0  | 0 | 0  | 0  | 0         | 0                | -1      |
| AT1G60270 | 0  | 0  | 0 | 0  | 0 | 0  | 0  | 0         | -1               | -1      |
| AT1G60450 | 0  | 0  | 0 | 1  | 0 | 1  | 0  | 0         | 0                | 1       |
| AT1G60550 | 0  | 0  | 0 | 0  | 0 | 0  | -1 | 0         | 0                | -1      |
| AT1G60590 | 0  | -1 | 0 | 0  | 0 | 0  | -1 | 0         | 0                | -1      |
| AT1G60610 | 0  | 0  | 0 | 1  | 0 | 1  | 0  | 0         | 0                | 1       |
| AT1G60950 | 0  | -1 | 0 | -1 | 0 | -1 | -1 | 0         | 0                | -1      |
| AT1G61255 | 0  | 0  | 0 | 1  | 0 | 0  | 0  | 1         | 0                | 1       |
| AT1G61300 | 0  | 0  | 0 | 0  | 0 | 0  | 0  | 0         | -1               | -1      |
| AT1G61440 | 0  | 0  | 0 | 0  | 0 | 0  | 0  | 0         | -1               | -1      |
| AT1G61490 | 0  | 0  | 0 | 0  | 0 | 0  | 0  | 0         | -1               | -1      |
| AT1G61520 | 0  | -1 | 0 | -1 | 0 | -1 | -1 | -1        | 0                | -1      |
| AT1G61560 | 0  | 0  | 0 | -1 | 0 | 0  | 0  | -1        | 0                | -1      |
| AT1G61930 | 0  | -1 | 0 | 0  | 0 | 0  | 0  | 0         | 0                | -1      |
| AT1G61970 | 0  | 0  | 0 | -1 | 0 | 0  | 0  | 0         | 0                | -1      |
| AT1G62000 | -1 | 0  | 0 | 0  | 0 | 0  | 0  | 0         | 0                | -1      |
| AT1G62060 | -1 | 0  | 0 | 0  | 0 | 0  | 0  | 0         | 0                | -1      |
| AT1G62080 | -1 | 0  | 0 | 0  | 0 | 0  | 0  | 0         | 0                | -1      |
| AT1G62110 | 0  | -1 | 0 | 0  | 0 | 0  | 0  | 0         | 0                | -1      |
| AT1G62220 | -1 | 0  | 0 | 0  | 0 | 0  | 0  | 0         | 0                | -1      |
| AT1G62250 | 0  | 0  | 0 | 0  | 0 | 0  | -1 | 0         | 0                | -1      |
| AT1G62280 | 0  | 1  | 0 | 1  | 0 | 0  | 0  | 0         | 0                | 1       |
| AT1G62290 | -1 | 0  | 0 | 0  | 0 | 0  | 0  | 0         | 0                | -1      |
| AT1G62400 | 0  | -1 | 0 | 0  | 0 | 0  | 0  | 0         | 0                | -1      |
| AT1G62440 | 0  | 0  | 1 | 1  | 0 | 0  | 0  | 0         | 0                | 1       |
| AT1G62490 | 0  | 0  | 0 | -1 | 0 | 0  | 0  | 0         | 0                | -1      |
| AT1G62500 | 0  | -1 | 0 | 0  | 0 | 0  | 0  | 0         | 0                | -1      |
| AT1G62610 | 0  | 1  | 0 | 1  | 0 | 0  | 0  | 0         | 1                | 1       |
| AT1G62660 | 0  | 0  | 0 | 1  | 0 | 0  | 1  | 0         | 0                | 1       |
| AT1G62690 | 0  | -1 | 0 | 0  | 0 | 0  | 0  | 0         | 0                | -1      |
| AT1G62760 | 0  | 0  | 0 | 1  | 0 | 0  | 0  | 0         | 1                | 1       |
| AT1G62766 | 0  | 0  | 0 | -1 | 0 | 0  | 0  | 0         | 0                | -1      |
| AT1G62780 | 0  | 0  | 0 | 0  | 0 | 0  | -1 | 0         | 0                | -1      |
| AT1G62850 | 0  | -1 | 0 | 0  | 0 | 0  | 0  | 0         | 0                | -1      |
| AT1G62935 | 0  | -1 | 0 | 0  | 0 | 0  | 0  | 0         | 0                | -1      |
| AT1G62960 | 0  | 0  | 0 | 0  | 0 | 0  | -1 | 0         | 0                | -1      |
| AT1G62975 | 0  | -1 | 0 | -1 | 0 | 0  | 0  | 0         | 0                | -1      |
| AT1G63100 | 0  | -1 | 0 | 0  | 0 | 0  | 0  | 0         | 0                | -1      |
| AT1G63380 | 0  | 0  | 0 | 1  | 0 | 0  | 1  | 0         | 0                | 1       |
| AT1G63650 | 0  | -1 | 0 | 0  | 0 | 0  | 0  | 0         | 0                | -1      |
| AT1G63800 | -1 | 0  | 0 | 0  | 0 | 0  | 0  | 0         | 0                | -1      |
| AT1G63930 | 0  | -1 | 0 | 0  | 0 | 0  | 0  | 0         | 0                | -1      |
| AT1G64110 | 0  | 1  | 0 | 1  | 0 | 1  | 1  | 0         | 0                | 1       |
| AT1G64160 | 0  | 0  | 0 | -1 | 0 | 0  | 0  | 0         | -1               | -1      |
| AT1G64170 | 0  | 0  | 0 | -1 | 0 | 0  | 0  | 0         | 0                | -1      |
| AT1G64185 | 0  | 0  | 0 | -1 | 0 | 0  | 0  | 0         | 0                | -1      |
| AT1G64210 | 0  | 0  | 0 | -1 | 0 | 0  | 0  | 0         | 0                | -1      |
| AT1G64220 | 0  | 0  | 0 | -1 | 0 | 0  | 0  | 0         | 0                | -1      |
| AT1G64250 | 0  | 0  | 0 | -1 | 0 | 0  | 0  | 0         | 0                | -1      |
| AT1G64390 | 1  | 1  | 0 | 1  | 0 | 0  | 1  | 0         | 0                | 1       |
| AT1G64400 | 0  | 0  | 0 | -1 | 0 | 0  | 0  | 0         | 0                | -1      |
| AT1G64450 | 0  | -1 | 0 | 0  | 0 | 0  | 0  | 0         | 0                | -1      |
| AT1G64500 | 0  | 0  | 0 | -1 | 0 | 0  | 0  | 0         | 0                | -1      |
| AT1G64640 | 1  | 1  | 1 | 1  | 0 | 0  | 1  | 0         | 0                | 1       |
| AT1G64660 | 0  | 1  | 1 | 1  | 1 | 1  | 1  | 0         | 1                | 1       |
| AT1G64670 | 0  | 0  | 0 | 1  | 0 | 0  | 0  | 1         | 0                | 1       |
| AT1G64720 | 0  | 0  | 0 | -1 | 0 | 0  | -1 | 0         | 0                | -1      |

Appendix Table S2

| Name      | 1  | 2  | 3  | 4  | 5  | 6  | 7  | pif45_Col | pif45bes1D_bes1D | ALL_PIF |
|-----------|----|----|----|----|----|----|----|-----------|------------------|---------|
| AT1G64780 | 0  | -1 | 0  | -1 | 0  | 0  | 0  | 0         | 0                | -1      |
| AT1G64860 | 0  | 0  | 0  | -1 | 0  | 0  | -1 | 0         | 0                | -1      |
| AT1G64900 | 0  | 0  | 0  | -1 | -1 | 0  | 0  | 0         | 0                | -1      |
| AT1G64910 | 0  | -1 | 0  | 0  | 0  | 0  | 0  | 0         | 0                | -1      |
| AT1G64920 | 0  | -1 | 0  | 0  | 0  | 0  | 0  | 0         | 0                | -1      |
| AT1G64950 | 0  | 0  | 0  | -1 | 0  | 0  | 0  | 0         | 0                | -1      |
| AT1G65060 | 0  | -1 | 0  | -1 | 0  | 0  | -1 | 0         | 0                | -1      |
| AT1G65190 | 0  | 0  | 0  | -1 | 0  | 0  | 0  | 0         | 0                | -1      |
| AT1G65230 | 0  | 0  | 0  | 0  | 0  | 0  | -1 | 0         | -1               | -1      |
| AT1G65310 | 1  | 0  | 1  | 1  | 0  | 0  | 0  | 0         | 0                | 1       |
| AT1G65390 | -1 | 0  | 0  | 0  | 0  | 0  | 0  | 0         | 0                | -1      |
| AT1G65410 | 0  | 0  | 0  | -1 | 0  | 0  | 0  | 0         | 0                | -1      |
| AT1G65481 | 0  | 0  | 0  | -1 | 0  | 0  | 0  | 0         | 0                | -1      |
| AT1G65484 | 0  | 0  | 0  | -1 | 0  | 0  | 0  | 0         | 0                | -1      |
| AT1G65490 | 0  | 0  | 0  | 0  | -1 | 0  | 0  | 0         | 0                | -1      |
| AT1G65541 | 0  | 0  | 0  | -1 | 0  | 0  | 0  | 0         | 0                | -1      |
| AT1G65710 | 0  | -1 | 0  | 0  | 0  | 0  | 0  | 0         | 0                | -1      |
| AT1G65840 | 0  | 0  | 0  | 1  | 0  | 0  | 1  | 0         | 0                | 1       |
| AT1G65875 | 0  | 1  | 0  | 1  | 0  | 0  | 0  | 0         | 0                | 1       |
| AT1G65900 | 0  | -1 | 0  | 0  | 0  | 0  | -1 | 0         | 0                | -1      |
| AT1G65920 | 1  | 1  | 0  | 1  | 1  | 0  | 1  | 0         | 0                | 1       |
| AT1G65950 | 0  | 0  | 0  | -1 | 0  | 0  | 0  | 0         | 0                | -1      |
| AT1G65960 | 1  | 0  | 0  | 0  | 0  | 0  | 1  | 0         | 0                | 1       |
| AT1G65970 | 0  | 1  | 0  | 1  | 0  | 0  | 0  | 0         | 0                | 1       |
| AT1G65985 | 0  | 0  | 0  | -1 | 0  | 0  | 0  | 0         | 0                | -1      |
| AT1G66100 | 0  | 0  | 0  | 0  | -1 | 0  | 0  | 0         | 0                | -1      |
| AT1G66130 | 0  | 0  | 0  | 0  | 0  | 0  | -1 | 0         | 0                | -1      |
| AT1G66230 | 0  | 1  | 0  | 1  | 0  | 0  | 0  | 0         | 0                | 1       |
| AT1G66270 | 0  | -1 | 0  | 0  | 0  | 0  | 0  | 0         | 0                | -1      |
| AT1G66360 | 0  | -1 | 0  | 0  | 0  | 0  | 0  | 0         | 0                | -1      |
| AT1G66650 | 0  | 0  | 0  | -1 | 0  | 0  | 0  | 0         | 0                | -1      |
| AT1G66700 | 0  | 0  | 0  | -1 | 0  | 0  | 0  | -1        | 0                | -1      |
| AT1G66760 | 0  | 0  | 0  | 0  | 0  | 0  | -1 | 0         | 0                | -1      |
| AT1G66780 | 0  | 1  | 0  | 1  | 0  | 0  | 0  | 0         | 0                | 1       |
| AT1G66800 | 0  | 0  | 0  | -1 | 0  | 0  | 0  | 0         | 0                | -1      |
| AT1G66870 | 0  | 0  | 0  | -1 | 0  | 0  | 0  | 0         | 0                | -1      |
| AT1G66890 | 0  | 0  | 0  | 0  | 0  | 0  | -1 | 0         | 0                | -1      |
| AT1G66910 | 0  | 0  | 0  | -1 | 0  | 0  | 0  | 0         | 0                | -1      |
| AT1G66970 | 0  | -1 | 0  | 0  | 0  | -1 | -1 | 0         | 0                | -1      |
| AT1G67035 | 0  | -1 | 0  | 0  | 0  | 0  | 0  | 0         | 0                | -1      |
| AT1G67090 | 0  | 0  | 0  | 0  | 0  | -1 | 0  | 0         | 0                | -1      |
| AT1G67105 | 0  | 0  | 0  | -1 | 0  | 0  | 0  | 0         | 0                | -1      |
| AT1G67110 | 0  | -1 | 0  | 0  | 0  | 0  | 0  | 0         | 0                | -1      |
| AT1G67265 | 0  | 1  | 0  | 1  | 0  | 0  | 0  | 0         | 0                | 1       |
| AT1G67365 | 0  | 0  | 0  | -1 | 0  | 0  | 0  | 0         | 0                | -1      |
| AT1G67400 | 0  | 0  | 0  | -1 | 0  | 0  | -1 | 0         | 0                | -1      |
| AT1G67590 | 0  | 1  | 0  | 1  | 0  | 0  | 0  | 0         | 0                | 1       |
| AT1G67700 | 0  | 0  | 0  | 0  | 0  | 0  | -1 | 0         | 0                | -1      |
| AT1G67740 | 0  | -1 | 0  | 0  | 0  | 0  | -1 | 0         | 0                | -1      |
| AT1G67820 | 0  | -1 | 0  | 0  | 0  | 0  | 0  | 0         | 0                | -1      |
| AT1G67920 | 0  | 0  | 0  | 1  | 0  | 0  | 1  | 0         | 0                | 1       |
| AT1G68010 | 0  | 0  | 0  | 0  | 0  | 0  | -1 | 0         | 0                | -1      |
| AT1G68080 | 0  | 0  | 0  | 0  | 0  | 0  | -1 | 0         | 0                | -1      |
| AT1G68120 | 0  | -1 | 0  | 0  | 0  | 0  | 0  | 0         | 0                | -1      |
| AT1G68190 | 0  | 0  | 0  | 0  | 0  | 0  | -1 | 0         | 0                | -1      |
| AT1G68238 | 0  | 0  | 0  | -1 | 0  | 0  | 0  | 0         | 0                | -1      |
| AT1G68430 | 0  | -1 | 0  | 0  | 0  | 0  | 0  | 0         | 0                | -1      |
| AT1G68480 | 0  | 0  | 0  | -1 | 0  | 0  | 0  | 0         | 0                | -1      |
| AT1G68510 | 0  | -1 | 0  | 0  | 0  | 0  | 0  | 0         | 0                | -1      |
| AT1G68520 | 0  | -1 | -1 | -1 | 0  | 0  | -1 | 0         | 0                | -1      |
| AT1G68560 | 1  | 0  | 0  | 1  | 0  | 0  | 1  | 0         | 0                | 1       |

Appendix Table S2

| Name      | 1 | 2  | 3  | 4  | 5  | 6  | 7  | pif45_Col | pif45bes1D_bes1D | ALL_PIF |
|-----------|---|----|----|----|----|----|----|-----------|------------------|---------|
| AT1G68585 | 0 | 0  | 0  | 0  | 0  | 0  | -1 | 0         | 0                | -1      |
| AT1G68590 | 0 | -1 | 0  | 0  | 0  | 0  | 0  | 0         | 0                | -1      |
| AT1G68620 | 1 | 1  | 0  | 1  | 0  | 0  | 0  | 0         | 0                | 1       |
| AT1G68800 | 0 | 1  | 0  | 1  | 0  | 0  | 0  | 0         | 0                | 1       |
| AT1G68830 | 0 | 0  | 0  | 0  | 0  | 0  | -1 | 0         | 0                | -1      |
| AT1G68840 | 0 | 0  | 0  | 0  | 0  | 0  | -1 | -1        | 0                | -1      |
| AT1G68850 | 0 | -1 | 0  | 0  | 0  | 0  | 0  | 0         | 0                | -1      |
| AT1G68862 | 0 | 0  | 0  | -1 | 0  | 0  | 0  | 0         | 0                | -1      |
| AT1G68870 | 0 | 0  | 0  | -1 | 0  | 0  | 0  | 0         | 0                | -1      |
| AT1G68880 | 0 | 0  | 0  | -1 | 0  | 0  | 0  | 0         | 0                | -1      |
| AT1G69230 | 0 | -1 | 0  | -1 | 0  | 0  | 0  | 0         | 0                | -1      |
| AT1G69490 | 0 | 1  | 0  | 1  | 0  | 1  | 0  | 0         | 0                | 1       |
| AT1G69523 | 0 | 0  | 0  | 0  | 0  | 0  | -1 | 0         | 0                | -1      |
| AT1G69530 | 0 | -1 | 0  | -1 | 0  | 0  | -1 | 0         | 0                | -1      |
| AT1G69570 | 0 | 1  | 0  | 1  | 1  | 0  | 0  | 0         | 0                | 1       |
| AT1G69690 | 0 | 1  | 0  | 0  | 0  | 0  | 1  | 0         | 0                | 1       |
| AT1G69700 | 0 | 0  | 0  | 0  | 0  | 0  | -1 | 0         | 0                | -1      |
| AT1G69920 | 0 | 0  | 0  | -1 | 0  | 0  | 0  | -1        | 0                | -1      |
| AT1G69970 | 0 | 0  | 0  | -1 | 0  | 0  | 0  | 0         | 0                | -1      |
| AT1G70260 | 0 | 0  | 0  | 1  | 0  | 1  | 0  | 1         | 1                | 1       |
| AT1G70270 | 0 | 0  | 0  | 0  | 0  | 1  | 1  | 0         | 0                | 1       |
| AT1G70310 | 0 | 0  | 0  | -1 | 0  | 0  | 0  | 0         | 0                | -1      |
| AT1G70410 | 0 | 0  | 0  | 0  | 0  | 0  | -1 | 0         | 0                | -1      |
| AT1G70430 | 0 | 0  | 0  | -1 | 0  | 0  | -1 | 0         | 0                | -1      |
| AT1G70440 | 0 | 1  | 0  | 1  | 0  | 0  | 0  | 0         | 0                | 1       |
| AT1G70530 | 0 | 0  | 0  | 0  | 0  | 0  | -1 | 0         | 0                | -1      |
| AT1G70580 | 0 | 0  | 0  | 0  | 0  | 0  | -1 | 0         | 0                | -1      |
| AT1G70600 | 0 | -1 | 0  | 0  | 0  | 0  | 0  | 0         | 0                | -1      |
| AT1G70610 | 0 | 0  | 0  | 0  | 0  | 0  | -1 | 0         | 0                | -1      |
| AT1G70690 | 0 | 0  | 0  | 1  | 0  | 0  | 1  | 0         | 0                | 1       |
| AT1G70700 | 0 | 0  | 0  | -1 | -1 | 0  | 0  | 0         | 0                | -1      |
| AT1G70710 | 0 | 1  | 0  | 1  | 0  | 1  | 1  | 0         | 0                | 1       |
| AT1G70760 | 0 | 0  | 0  | 0  | 0  | 0  | -1 | 0         | 0                | -1      |
| AT1G70820 | 0 | -1 | 0  | -1 | 0  | -1 | 0  | 0         | 0                | -1      |
| AT1G70830 | 1 | 0  | 0  | 1  | 0  | 0  | 0  | 0         | 0                | 1       |
| AT1G70840 | 0 | 1  | 0  | 0  | 0  | 0  | 1  | 0         | 0                | 1       |
| AT1G70850 | 0 | -1 | 0  | 0  | 0  | 0  | 0  | 0         | 0                | -1      |
| AT1G70940 | 1 | 0  | 0  | 0  | 1  | 0  | 0  | 0         | 0                | 1       |
| AT1G70990 | 0 | 0  | 0  | 1  | 0  | 0  | 1  | 0         | 0                | 1       |
| AT1G71250 | 0 | 1  | 0  | 0  | 0  | 0  | 1  | 0         | 0                | 1       |
| AT1G71420 | 0 | -1 | 0  | 0  | 0  | 0  | 0  | 0         | 0                | -1      |
| AT1G71480 | 0 | 0  | 0  | 0  | 0  | 0  | -1 | 0         | 0                | -1      |
| AT1G71528 | 0 | 0  | 0  | -1 | 0  | 0  | 0  | 0         | 0                | -1      |
| AT1G71692 | 0 | -1 | 0  | 0  | 0  | 0  | 0  | 0         | 0                | -1      |
| AT1G71730 | 0 | 0  | 0  | 0  | 0  | 0  | 0  | -1        | 0                | -1      |
| AT1G71810 | 0 | 0  | 0  | 0  | 0  | 0  | -1 | 0         | 0                | -1      |
| AT1G71850 | 0 | -1 | 0  | 0  | 0  | 0  | 0  | 0         | 0                | -1      |
| AT1G71880 | 0 | 0  | 0  | 0  | 0  | 0  | -1 | 0         | 0                | -1      |
| AT1G71890 | 0 | -1 | 0  | -1 | 0  | 0  | 0  | 0         | 0                | -1      |
| AT1G72030 | 0 | -1 | 0  | 0  | 0  | 0  | -1 | 0         | 0                | -1      |
| AT1G72060 | 0 | 0  | 0  | 0  | 0  | 0  | -1 | 0         | 0                | -1      |
| AT1G72210 | 0 | 0  | 0  | -1 | 0  | 0  | 0  | 0         | 0                | -1      |
| AT1G72230 | 1 | 0  | 0  | 1  | 0  | 0  | 0  | 0         | 0                | 1       |
| AT1G72240 | 0 | 0  | 0  | 1  | 0  | 0  | 1  | 0         | 0                | 1       |
| AT1G72250 | 0 | -1 | 0  | 0  | 0  | 0  | 0  | 0         | 0                | -1      |
| AT1G72290 | 0 | 1  | 0  | 1  | 0  | 1  | 1  | 0         | 0                | 1       |
| AT1G72370 | 0 | -1 | 0  | 0  | 0  | 0  | 0  | 0         | 0                | -1      |
| AT1G72416 | 0 | 0  | 0  | -1 | 0  | 0  | 0  | 0         | 0                | -1      |
| AT1G72470 | 0 | 0  | 0  | 1  | 0  | 0  | 1  | 0         | 0                | 1       |
| AT1G72490 | 0 | 1  | 0  | 1  | 0  | 0  | 0  | 0         | 0                | 1       |
| AT1G72610 | 0 | -1 | -1 | -1 | 0  | -1 | -1 | 0         | 0                | -1      |



Appendix Table S2

| Name      | 1  | 2  | 3  | 4  | 5 | 6  | 7  | pif45_Col | pif45bes1D_bes1D | ALL_PIF |
|-----------|----|----|----|----|---|----|----|-----------|------------------|---------|
| AT1G77120 | 0  | -1 | 0  | 0  | 0 | 0  | 0  | 0         | 0                | -1      |
| AT1G77200 | 0  | 1  | 0  | 1  | 0 | 1  | 1  | 0         | 0                | 1       |
| AT1G77210 | 0  | 0  | 0  | 0  | 0 | 0  | -1 | 0         | 0                | -1      |
| AT1G77330 | 0  | 1  | 1  | 1  | 0 | 1  | 1  | 0         | 0                | 1       |
| AT1G77360 | 0  | 0  | 0  | -1 | 0 | 0  | 0  | 0         | 0                | -1      |
| AT1G77490 | 0  | 0  | 0  | 0  | 0 | 0  | -1 | 0         | 0                | -1      |
| AT1G77520 | 0  | 1  | 0  | 0  | 0 | 0  | 0  | 1         | 0                | 1       |
| AT1G77630 | 0  | -1 | 0  | 0  | 0 | 0  | 0  | 0         | 0                | -1      |
| AT1G77640 | 0  | 1  | 0  | 1  | 0 | 0  | 0  | 0         | 0                | 1       |
| AT1G77760 | 0  | 0  | 0  | 0  | 0 | 0  | -1 | 0         | 0                | -1      |
| AT1G77940 | 0  | 0  | 0  | 0  | 0 | -1 | 0  | 0         | 0                | -1      |
| AT1G77950 | 0  | 1  | 0  | 1  | 0 | 0  | 1  | 0         | 0                | 1       |
| AT1G77990 | 0  | -1 | 0  | 0  | 0 | 0  | 0  | 0         | 0                | -1      |
| AT1G78020 | 0  | -1 | 0  | -1 | 0 | 0  | 0  | 0         | 0                | -1      |
| AT1G78030 | 0  | -1 | 0  | 0  | 0 | 0  | 0  | 0         | 0                | -1      |
| AT1G78140 | -1 | 0  | 0  | 0  | 0 | 0  | 0  | 0         | 0                | -1      |
| AT1G78230 | 0  | 1  | 0  | 1  | 0 | 0  | 0  | 0         | 0                | 1       |
| AT1G78320 | 0  | -1 | 0  | 0  | 0 | 0  | 0  | 0         | 0                | -1      |
| AT1G78370 | 0  | -1 | -1 | 0  | 0 | 0  | 0  | 0         | 0                | -1      |
| AT1G78410 | 0  | 0  | 0  | 0  | 0 | 0  | 0  | -1        | 0                | -1      |
| AT1G78430 | 0  | -1 | 0  | 0  | 0 | 0  | 0  | 0         | 0                | -1      |
| AT1G78460 | 0  | -1 | 0  | -1 | 0 | 0  | -1 | 0         | 0                | -1      |
| AT1G78480 | 0  | -1 | 0  | 0  | 0 | 0  | 0  | 0         | 0                | -1      |
| AT1G78570 | 0  | 0  | 0  | 1  | 0 | 0  | 1  | 0         | 0                | 1       |
| AT1G78580 | 0  | -1 | 0  | -1 | 0 | 0  | 0  | 0         | 0                | -1      |
| AT1G78630 | 0  | 0  | 0  | 0  | 0 | -1 | 0  | 0         | 0                | -1      |
| AT1G78750 | 0  | 0  | 0  | -1 | 0 | 0  | 0  | 0         | 0                | -1      |
| AT1G78820 | 0  | -1 | 0  | -1 | 0 | 0  | -1 | 0         | 0                | -1      |
| AT1G78970 | 1  | 1  | 1  | 1  | 0 | 0  | 0  | 0         | 0                | 1       |
| AT1G78995 | 0  | -1 | 0  | 0  | 0 | 0  | -1 | 0         | 0                | -1      |
| AT1G79040 | 0  | -1 | 0  | 0  | 0 | -1 | -1 | 0         | 0                | -1      |
| AT1G79580 | 0  | 0  | 0  | -1 | 0 | 0  | 0  | 0         | 0                | -1      |
| AT1G79680 | 0  | 0  | 0  | -1 | 0 | 0  | 0  | -1        | -1               | -1      |
| AT1G79760 | 0  | 0  | 0  | -1 | 0 | 0  | 0  | 0         | 0                | -1      |
| AT1G79770 | 0  | -1 | 0  | 0  | 0 | 0  | 0  | 0         | 0                | -1      |
| AT1G79790 | 0  | -1 | 0  | 0  | 0 | 0  | -1 | 0         | 0                | -1      |
| AT1G79850 | 0  | -1 | 0  | 0  | 0 | 0  | 0  | 0         | 0                | -1      |
| AT1G79910 | 0  | 0  | 0  | -1 | 0 | 0  | 0  | 0         | 0                | -1      |
| AT1G80100 | 0  | 0  | 0  | -1 | 0 | 0  | 0  | 0         | 0                | -1      |
| AT1G80120 | 0  | -1 | 0  | 0  | 0 | 0  | 0  | 0         | 0                | -1      |
| AT1G80130 | 1  | 0  | 0  | 1  | 0 | 0  | 0  | 0         | 0                | 1       |
| AT1G80270 | 0  | -1 | 0  | 0  | 0 | 0  | 0  | 0         | 0                | -1      |
| AT1G80340 | 0  | -1 | 0  | 0  | 0 | 0  | 0  | 0         | 0                | -1      |
| AT1G80380 | 0  | 0  | 0  | 0  | 0 | 0  | -1 | 0         | 0                | -1      |
| AT1G80440 | 0  | 0  | 0  | 0  | 0 | 0  | -1 | 0         | 0                | -1      |
| AT1G80450 | 0  | -1 | 0  | 0  | 0 | 0  | 0  | 0         | 0                | -1      |
| AT1G80640 | 0  | 0  | 0  | 0  | 0 | 0  | -1 | 0         | 0                | -1      |
| AT1G80720 | 0  | -1 | 0  | 0  | 0 | 0  | 0  | 0         | 0                | -1      |
| AT1G80730 | 0  | 0  | 0  | -1 | 0 | 0  | 0  | 0         | 0                | -1      |
| AT1G80740 | 0  | -1 | 0  | 0  | 0 | 0  | 0  | 0         | 0                | -1      |
| AT1G80850 | 0  | 0  | 0  | 0  | 0 | 0  | -1 | 0         | 0                | -1      |
| AT2G01020 | 0  | 0  | 0  | -1 | 0 | 0  | 0  | 0         | 0                | -1      |
| AT2G01021 | 0  | 0  | 0  | -1 | 0 | 0  | 0  | 0         | 0                | -1      |
| AT2G01150 | 1  | 0  | 0  | 1  | 0 | 0  | 0  | 0         | 0                | 1       |
| AT2G01590 | 0  | 0  | -1 | 0  | 0 | 0  | -1 | 0         | 0                | -1      |
| AT2G01610 | 0  | 1  | 0  | 1  | 0 | 0  | 0  | 0         | 0                | 1       |
| AT2G01760 | 0  | -1 | 0  | -1 | 0 | 0  | -1 | 0         | 0                | -1      |
| AT2G01770 | 0  | 0  | 0  | 1  | 0 | 1  | 0  | 0         | 0                | 1       |
| AT2G01870 | 0  | 0  | 0  | 0  | 0 | 0  | -1 | 0         | 0                | -1      |
| AT2G01890 | 0  | -1 | 0  | 0  | 0 | -1 | -1 | 0         | 0                | -1      |
| AT2G01913 | 0  | -1 | 0  | -1 | 0 | 0  | 0  | 0         | 0                | -1      |



Appendix Table S2

| Name      | 1 | 2  | 3  | 4  | 5 | 6 | 7  | pif45_Col | pif45bes1D_bes1D | ALL_PIF |
|-----------|---|----|----|----|---|---|----|-----------|------------------|---------|
| AT2G15010 | 0 | 1  | 0  | 0  | 0 | 0 | 1  | 0         | 0                | 1       |
| AT2G15050 | 0 | 0  | 0  | -1 | 0 | 0 | -1 | -1        | 0                | -1      |
| AT2G15080 | 0 | 0  | 0  | 0  | 0 | 0 | 0  | -1        | 0                | -1      |
| AT2G15090 | 0 | -1 | 0  | 0  | 0 | 0 | -1 | 0         | 0                | -1      |
| AT2G15220 | 0 | 0  | 0  | -1 | 0 | 0 | 0  | 0         | 0                | -1      |
| AT2G15370 | 0 | -1 | 0  | 0  | 0 | 0 | 0  | 0         | 0                | -1      |
| AT2G15390 | 0 | 0  | 0  | -1 | 0 | 0 | 0  | 0         | 0                | -1      |
| AT2G15620 | 0 | -1 | 0  | 0  | 0 | 0 | 0  | 0         | 0                | -1      |
| AT2G15880 | 0 | 0  | 0  | -1 | 0 | 0 | 0  | 0         | 0                | -1      |
| AT2G15960 | 0 | 0  | 0  | 0  | 0 | 0 | -1 | 0         | 0                | -1      |
| AT2G16060 | 0 | -1 | 0  | 0  | 0 | 0 | 0  | 0         | 0                | -1      |
| AT2G16230 | 0 | -1 | 0  | 0  | 0 | 0 | 0  | 0         | 0                | -1      |
| AT2G16380 | 0 | 0  | 0  | -1 | 0 | 0 | 0  | 0         | 0                | -1      |
| AT2G16430 | 0 | -1 | 0  | 0  | 0 | 0 | 0  | 0         | 0                | -1      |
| AT2G16570 | 0 | -1 | 0  | 0  | 0 | 0 | 0  | 0         | 0                | -1      |
| AT2G16586 | 0 | -1 | 0  | -1 | 0 | 0 | 0  | 0         | 0                | -1      |
| AT2G16630 | 0 | 0  | 0  | 1  | 0 | 0 | 0  | 1         | 0                | 1       |
| AT2G16660 | 0 | -1 | 0  | 0  | 0 | 0 | 0  | 0         | 0                | -1      |
| AT2G16850 | 0 | -1 | 0  | 0  | 0 | 0 | 0  | 0         | 0                | -1      |
| AT2G17040 | 0 | 0  | 0  | -1 | 0 | 0 | 0  | -1        | 0                | -1      |
| AT2G17230 | 0 | 0  | 0  | 0  | 0 | 0 | -1 | 0         | 0                | -1      |
| AT2G17525 | 0 | 0  | 0  | -1 | 0 | 0 | 0  | 0         | 0                | -1      |
| AT2G17640 | 0 | 0  | 0  | 0  | 0 | 0 | -1 | 0         | 0                | -1      |
| AT2G17780 | 0 | 0  | 0  | -1 | 0 | 0 | 0  | 0         | 0                | -1      |
| AT2G17840 | 0 | 0  | 0  | 1  | 0 | 0 | 1  | 0         | 0                | 1       |
| AT2G17880 | 0 | 0  | 0  | 0  | 0 | 0 | -1 | 0         | 0                | -1      |
| AT2G17972 | 0 | -1 | 0  | 0  | 0 | 0 | -1 | 0         | 0                | -1      |
| AT2G18050 | 0 | 1  | 1  | 0  | 0 | 0 | 1  | 0         | 0                | 1       |
| AT2G18210 | 0 | -1 | 0  | 0  | 0 | 0 | 0  | 0         | 0                | -1      |
| AT2G18290 | 0 | 0  | 0  | 0  | 0 | 0 | -1 | 0         | 0                | -1      |
| AT2G18300 | 0 | 0  | 0  | 0  | 0 | 0 | -1 | 0         | 0                | -1      |
| AT2G18328 | 0 | -1 | 0  | -1 | 0 | 0 | 0  | 0         | 0                | -1      |
| AT2G18340 | 0 | -1 | 0  | 0  | 0 | 0 | 0  | 0         | 0                | -1      |
| AT2G18670 | 0 | 0  | 0  | 0  | 0 | 0 | 0  | 0         | -1               | -1      |
| AT2G18690 | 0 | 0  | 0  | 1  | 0 | 0 | 1  | 0         | 0                | 1       |
| AT2G18800 | 0 | -1 | 0  | 0  | 0 | 0 | 0  | 0         | 0                | -1      |
| AT2G18969 | 0 | 1  | 0  | 1  | 0 | 0 | 0  | 0         | 0                | 1       |
| AT2G19060 | 0 | -1 | 0  | 0  | 0 | 0 | 0  | 0         | 0                | -1      |
| AT2G19190 | 0 | 0  | 0  | -1 | 0 | 0 | 0  | 0         | 0                | -1      |
| AT2G19385 | 0 | -1 | 0  | 0  | 0 | 0 | 0  | 0         | 0                | -1      |
| AT2G19660 | 1 | 1  | 1  | 1  | 1 | 1 | 1  | 0         | 0                | 1       |
| AT2G19670 | 0 | -1 | 0  | 0  | 0 | 0 | 0  | 0         | 0                | -1      |
| AT2G19730 | 0 | -1 | 0  | 0  | 0 | 0 | 0  | 0         | 0                | -1      |
| AT2G19750 | 0 | -1 | 0  | 0  | 0 | 0 | 0  | 0         | 0                | -1      |
| AT2G19900 | 0 | 1  | 0  | 0  | 0 | 0 | 1  | 0         | 0                | 1       |
| AT2G19960 | 0 | 0  | 0  | -1 | 0 | 0 | 0  | 0         | 0                | -1      |
| AT2G19990 | 0 | -1 | 0  | -1 | 0 | 0 | 0  | 0         | 0                | -1      |
| AT2G20180 | 0 | 1  | 0  | 1  | 0 | 0 | 1  | 0         | 0                | 1       |
| AT2G20250 | 0 | -1 | 0  | 0  | 0 | 0 | 0  | 0         | 0                | -1      |
| AT2G20260 | 0 | -1 | -1 | 0  | 0 | 0 | -1 | 0         | 0                | -1      |
| AT2G20340 | 0 | -1 | 0  | 0  | 0 | 0 | 0  | 0         | 0                | -1      |
| AT2G20450 | 0 | -1 | 0  | 0  | 0 | 0 | 0  | 0         | 0                | -1      |
| AT2G20635 | 0 | -1 | 0  | 0  | 0 | 0 | 0  | 0         | 0                | -1      |
| AT2G20750 | 0 | 0  | 0  | 1  | 0 | 0 | 0  | 1         | 0                | 1       |
| AT2G20880 | 0 | 1  | 0  | 1  | 0 | 0 | 0  | 0         | 0                | 1       |
| AT2G20940 | 0 | -1 | 0  | 0  | 0 | 0 | 0  | 0         | 0                | -1      |
| AT2G21080 | 0 | -1 | 0  | 0  | 0 | 0 | 0  | 0         | 0                | -1      |
| AT2G21100 | 0 | 0  | 0  | 1  | 0 | 0 | 1  | 0         | 0                | 1       |
| AT2G21140 | 0 | 1  | 0  | 1  | 0 | 0 | 1  | 0         | 0                | 1       |
| AT2G21185 | 0 | 0  | 0  | 0  | 0 | 0 | -1 | 0         | 0                | -1      |
| AT2G21210 | 0 | -1 | 0  | 0  | 0 | 0 | -1 | 0         | 0                | -1      |



Appendix Table S2

| Name      | 1  | 2  | 3  | 4  | 5 | 6  | 7  | pif45_Col | pif45bes1D_bes1D | ALL_PIF |
|-----------|----|----|----|----|---|----|----|-----------|------------------|---------|
| AT2G21220 | 0  | 0  | 0  | 0  | 0 | 0  | -1 | 0         | 0                | -1      |
| AT2G21320 | 0  | 0  | 0  | 0  | 0 | 0  | -1 | 0         | 0                | -1      |
| AT2G21330 | 0  | -1 | -1 | 0  | 0 | -1 | -1 | 0         | 0                | -1      |
| AT2G21400 | 0  | 0  | 0  | -1 | 0 | 0  | 0  | 0         | 0                | -1      |
| AT2G21540 | 1  | 1  | 0  | 0  | 0 | 0  | 0  | 0         | 0                | 1       |
| AT2G21620 | 0  | 0  | 0  | 1  | 0 | 0  | 1  | 0         | 0                | 1       |
| AT2G21650 | 0  | -1 | 0  | -1 | 0 | 0  | 0  | 0         | 0                | -1      |
| AT2G21860 | 0  | -1 | 0  | 0  | 0 | 0  | 0  | 0         | 0                | -1      |
| AT2G21910 | 0  | 1  | 0  | 1  | 0 | 1  | 1  | 1         | 1                | 1       |
| AT2G21960 | 0  | 0  | 0  | 0  | 0 | 0  | -1 | 0         | 0                | -1      |
| AT2G22190 | 0  | -1 | 0  | 0  | 0 | 0  | 0  | 0         | 0                | -1      |
| AT2G22330 | 0  | 0  | 0  | 0  | 0 | 0  | 0  | 0         | -1               | -1      |
| AT2G22420 | 0  | 0  | 0  | 0  | 0 | 0  | -1 | 0         | 0                | -1      |
| AT2G22470 | 0  | 0  | 0  | 1  | 0 | 0  | 1  | 0         | 0                | 1       |
| AT2G22510 | 0  | -1 | 0  | 0  | 0 | 0  | 0  | 0         | 0                | -1      |
| AT2G22600 | 0  | -1 | 0  | 0  | 0 | 0  | 0  | 0         | 0                | -1      |
| AT2G22810 | 0  | -1 | 0  | 0  | 0 | 0  | 0  | 0         | 0                | -1      |
| AT2G22980 | 0  | 0  | 0  | 0  | 0 | 0  | -1 | 0         | 0                | -1      |
| AT2G22990 | 0  | -1 | 0  | 0  | 0 | 0  | -1 | 0         | 0                | -1      |
| AT2G23050 | 0  | 0  | 0  | -1 | 0 | 0  | 0  | 0         | 0                | -1      |
| AT2G23130 | 0  | 0  | 0  | -1 | 0 | 0  | 0  | 0         | 0                | -1      |
| AT2G23170 | 0  | 0  | 0  | 0  | 1 | 0  | 1  | 0         | 0                | 1       |
| AT2G23180 | 0  | -1 | 0  | 0  | 0 | 0  | 0  | 0         | 0                | -1      |
| AT2G23260 | 0  | 0  | 0  | 0  | 0 | 0  | 0  | 0         | -1               | -1      |
| AT2G23270 | 0  | 0  | 0  | -1 | 0 | 0  | 0  | -1        | 0                | -1      |
| AT2G23330 | 0  | 0  | 0  | -1 | 0 | 0  | 0  | 0         | 0                | -1      |
| AT2G23410 | 0  | -1 | 0  | 0  | 0 | 0  | 0  | 0         | 0                | -1      |
| AT2G23420 | 0  | 0  | 0  | 0  | 0 | 0  | -1 | 0         | 0                | -1      |
| AT2G23430 | -1 | 0  | 0  | 0  | 0 | 0  | 0  | 0         | 0                | -1      |
| AT2G23540 | 0  | -1 | 0  | 0  | 0 | 0  | 0  | 0         | 0                | -1      |
| AT2G23600 | 0  | 0  | 0  | -1 | 0 | 0  | -1 | 0         | 0                | -1      |
| AT2G23630 | 0  | -1 | 0  | 0  | 0 | 0  | 0  | 0         | 0                | -1      |
| AT2G23640 | 0  | 1  | 0  | 0  | 0 | 0  | 1  | 0         | 0                | 1       |
| AT2G23670 | 0  | -1 | -1 | 0  | 0 | 0  | -1 | 0         | 0                | -1      |
| AT2G23760 | 0  | 0  | 0  | 0  | 0 | 0  | -1 | 0         | 0                | -1      |
| AT2G24170 | 0  | 0  | 0  | 1  | 0 | 0  | 1  | 0         | 0                | 1       |
| AT2G24270 | 0  | 0  | 0  | 0  | 0 | 0  | 0  | -1        | 0                | -1      |
| AT2G24280 | 0  | 0  | 0  | 0  | 0 | 0  | -1 | 0         | 0                | -1      |
| AT2G24300 | 0  | 1  | 1  | 1  | 0 | 0  | 1  | 0         | 0                | 1       |
| AT2G24400 | 0  | -1 | 0  | -1 | 0 | 0  | 0  | 0         | 0                | -1      |
| AT2G24450 | 0  | -1 | 0  | 0  | 0 | 0  | 0  | 0         | 0                | -1      |
| AT2G24560 | 0  | -1 | 0  | 0  | 0 | 0  | 0  | 0         | 0                | -1      |
| AT2G24600 | 0  | 0  | 0  | -1 | 0 | 0  | 0  | 0         | 0                | -1      |
| AT2G24645 | 0  | -1 | 0  | 0  | 0 | 0  | 0  | 0         | 0                | -1      |
| AT2G24790 | 0  | 0  | 0  | 0  | 0 | 0  | 0  | -1        | 0                | -1      |
| AT2G24820 | 0  | 0  | 0  | 0  | 0 | 0  | -1 | 0         | 0                | -1      |
| AT2G24850 | 0  | -1 | 0  | 0  | 0 | 0  | 0  | 0         | 0                | -1      |
| AT2G25060 | 0  | -1 | 0  | 0  | 0 | 0  | 0  | 0         | 0                | -1      |
| AT2G25130 | 0  | 1  | 0  | 1  | 0 | 1  | 0  | 0         | 0                | 1       |
| AT2G25150 | 0  | -1 | 0  | 0  | 0 | 0  | 0  | 0         | 0                | -1      |
| AT2G25270 | 0  | -1 | 0  | 0  | 0 | 0  | 0  | 0         | 0                | -1      |
| AT2G25450 | 0  | 1  | 0  | 1  | 0 | 0  | 0  | 0         | 0                | 1       |
| AT2G25470 | 0  | 0  | 0  | -1 | 0 | 0  | 0  | 0         | 0                | -1      |
| AT2G25735 | 0  | 0  | 0  | -1 | 0 | 0  | 0  | 0         | 0                | -1      |
| AT2G25890 | 0  | 0  | 0  | 1  | 0 | 0  | 1  | 0         | 0                | 1       |
| AT2G25900 | 0  | 0  | 0  | 0  | 0 | 0  | -1 | 0         | 0                | -1      |
| AT2G25980 | 0  | 0  | 0  | -1 | 0 | 0  | 0  | 0         | 0                | -1      |
| AT2G26030 | 0  | 0  | 0  | 0  | 0 | 0  | 0  | -1        | 0                | -1      |
| AT2G26040 | 0  | -1 | 0  | 0  | 0 | 0  | 0  | 0         | 0                | -1      |
| AT2G26180 | 0  | -1 | 0  | 0  | 0 | 0  | 0  | 0         | 0                | -1      |
| AT2G26211 | 0  | 0  | 0  | -1 | 0 | 0  | 0  | 0         | 0                | -1      |

Appendix Table S2

| Name      | 1  | 2  | 3  | 4  | 5 | 6  | 7  | pif45_Col | pif45bes1D_bes1D | ALL_PIF |
|-----------|----|----|----|----|---|----|----|-----------|------------------|---------|
| AT2G26215 | 0  | 0  | 0  | -1 | 0 | 0  | 0  | 0         | 0                | -1      |
| AT2G26440 | 0  | 1  | 1  | 0  | 0 | 0  | 1  | 0         | 0                | 1       |
| AT2G26450 | 0  | -1 | 0  | 0  | 0 | 0  | 0  | 0         | 0                | -1      |
| AT2G26500 | 0  | -1 | 0  | 0  | 0 | 0  | -1 | 0         | 0                | -1      |
| AT2G26520 | 0  | -1 | 0  | 0  | 0 | 0  | 0  | 0         | 0                | -1      |
| AT2G26530 | 0  | 0  | 0  | -1 | 0 | 0  | -1 | -1        | 0                | -1      |
| AT2G26580 | 0  | -1 | 0  | -1 | 0 | 0  | -1 | 0         | 0                | -1      |
| AT2G26695 | 0  | 1  | 0  | 1  | 0 | 0  | 0  | 0         | 0                | 1       |
| AT2G26900 | 0  | -1 | 0  | 0  | 0 | 0  | 0  | 0         | 0                | -1      |
| AT2G27290 | 0  | 0  | 0  | 0  | 0 | 0  | -1 | 0         | 0                | -1      |
| AT2G27300 | 0  | 1  | 0  | 0  | 0 | 0  | 1  | 0         | 0                | 1       |
| AT2G27370 | 0  | 0  | 0  | 1  | 0 | 0  | 1  | 0         | 0                | 1       |
| AT2G27380 | 0  | 0  | 0  | -1 | 0 | 0  | 0  | 0         | 0                | -1      |
| AT2G27402 | 0  | -1 | 0  | 0  | 0 | -1 | 0  | 0         | 0                | -1      |
| AT2G27550 | 0  | -1 | 0  | 0  | 0 | 0  | 0  | 0         | 0                | -1      |
| AT2G27610 | 0  | -1 | 0  | 0  | 0 | 0  | 0  | 0         | 0                | -1      |
| AT2G27710 | 0  | -1 | 0  | 0  | 0 | 0  | 0  | 0         | 0                | -1      |
| AT2G27775 | 0  | -1 | 0  | 0  | 0 | 0  | 0  | -1        | 0                | -1      |
| AT2G27830 | 1  | 1  | 0  | 0  | 0 | 0  | 0  | 0         | 0                | 1       |
| AT2G27840 | 0  | -1 | 0  | 0  | 0 | 0  | 0  | 0         | 0                | -1      |
| AT2G27930 | 0  | 1  | 0  | 1  | 0 | 0  | 0  | 0         | 0                | 1       |
| AT2G27970 | 1  | 0  | 0  | 1  | 0 | 0  | 0  | 0         | 0                | 1       |
| AT2G28110 | 0  | 1  | 0  | 1  | 0 | 0  | 0  | 0         | 0                | 1       |
| AT2G28140 | 0  | -1 | 0  | 0  | 0 | 0  | 0  | 0         | 0                | -1      |
| AT2G28200 | 0  | 1  | 1  | 0  | 0 | 0  | 0  | 0         | 0                | 1       |
| AT2G28210 | 0  | 0  | 0  | 0  | 0 | 0  | 0  | -1        | 0                | -1      |
| AT2G28260 | 0  | 1  | 0  | 1  | 0 | 0  | 0  | 0         | 0                | 1       |
| AT2G28270 | 0  | -1 | 0  | 0  | 0 | 0  | 0  | 0         | 0                | -1      |
| AT2G28400 | 0  | 1  | 0  | 1  | 0 | 0  | 1  | 0         | 0                | 1       |
| AT2G28470 | 1  | 0  | 0  | 1  | 0 | 0  | 0  | 0         | 0                | 1       |
| AT2G28605 | 0  | 0  | -1 | 0  | 0 | 0  | -1 | 0         | 0                | -1      |
| AT2G28630 | 0  | 1  | 0  | 1  | 0 | 1  | 1  | 0         | 0                | 1       |
| AT2G28650 | 0  | -1 | 0  | 0  | 0 | 0  | 0  | 0         | 0                | -1      |
| AT2G28780 | 0  | 1  | 0  | 1  | 0 | 1  | 0  | 0         | 0                | 1       |
| AT2G28860 | 0  | 0  | 0  | -1 | 0 | 0  | 0  | 0         | 0                | -1      |
| AT2G28900 | 0  | 0  | 0  | 0  | 0 | 0  | -1 | 0         | 0                | -1      |
| AT2G28950 | 0  | 0  | 0  | 0  | 0 | 0  | -1 | 0         | 0                | -1      |
| AT2G29180 | 0  | 0  | 0  | 0  | 0 | 0  | -1 | 0         | 0                | -1      |
| AT2G29220 | 0  | 0  | 0  | -1 | 0 | 0  | 0  | 0         | 0                | -1      |
| AT2G29260 | 0  | -1 | 0  | 0  | 0 | 0  | 0  | 0         | 0                | -1      |
| AT2G29290 | 0  | 0  | 0  | 0  | 0 | 0  | -1 | 0         | 0                | -1      |
| AT2G29310 | 0  | 0  | 0  | 0  | 0 | 0  | -1 | 0         | 0                | -1      |
| AT2G29320 | 0  | -1 | 0  | 0  | 0 | 0  | 0  | 0         | 0                | -1      |
| AT2G29340 | 0  | 0  | 0  | 0  | 0 | 0  | -1 | 0         | 0                | -1      |
| AT2G29360 | 0  | -1 | 0  | -1 | 0 | 0  | -1 | 0         | 0                | -1      |
| AT2G29440 | 0  | 1  | 0  | 1  | 0 | 0  | 1  | 0         | 0                | 1       |
| AT2G29490 | 0  | 0  | 0  | 0  | 0 | 0  | -1 | 0         | 0                | -1      |
| AT2G29630 | 0  | 0  | 0  | 0  | 0 | 0  | -1 | 0         | 0                | -1      |
| AT2G29650 | 0  | 0  | 0  | 0  | 0 | 0  | -1 | 0         | 0                | -1      |
| AT2G29670 | 0  | 0  | 0  | 0  | 0 | 0  | -1 | 0         | 0                | -1      |
| AT2G29740 | -1 | 0  | 0  | 0  | 0 | 0  | 0  | 0         | 0                | -1      |
| AT2G30010 | 0  | 0  | 0  | -1 | 0 | 0  | -1 | 0         | 0                | -1      |
| AT2G30070 | 0  | 0  | 0  | 0  | 0 | 0  | -1 | 0         | 0                | -1      |
| AT2G30130 | 0  | 0  | 0  | -1 | 0 | 0  | 0  | 0         | 0                | -1      |
| AT2G30170 | 0  | 0  | 0  | 0  | 0 | 0  | -1 | 0         | 0                | -1      |
| AT2G30210 | 0  | 0  | 0  | 1  | 0 | 0  | 1  | 0         | 0                | 1       |
| AT2G30420 | 0  | -1 | 0  | 0  | 0 | 0  | 0  | 0         | 0                | -1      |
| AT2G30424 | 0  | 0  | 0  | -1 | 0 | 0  | 0  | 0         | 0                | -1      |
| AT2G30520 | 0  | -1 | -1 | -1 | 0 | -1 | -1 | 0         | 0                | -1      |
| AT2G30540 | 0  | -1 | -1 | -1 | 0 | 0  | -1 | 0         | 0                | -1      |
| AT2G30550 | 0  | 0  | 0  | 1  | 0 | 0  | 1  | 0         | 0                | 1       |

Appendix Table S2

| Name      | 1 | 2  | 3  | 4  | 5  | 6  | 7  | pif45_Col | pif45bes1D_bes1D | ALL_PIF |
|-----------|---|----|----|----|----|----|----|-----------|------------------|---------|
| AT2G30570 | 0 | -1 | 0  | 0  | 0  | -1 | -1 | 0         | 0                | -1      |
| AT2G30600 | 0 | 0  | 0  | 0  | 0  | 0  | -1 | 0         | 0                | -1      |
| AT2G30750 | 0 | 0  | 0  | -1 | 0  | 0  | 0  | -1        | 0                | -1      |
| AT2G30766 | 0 | 0  | 0  | -1 | 0  | 0  | 0  | 0         | 0                | -1      |
| AT2G30770 | 0 | 0  | 0  | -1 | 0  | 0  | 0  | 0         | -1               | -1      |
| AT2G30790 | 0 | 0  | 0  | -1 | 0  | 0  | 0  | 0         | 0                | -1      |
| AT2G30820 | 0 | -1 | 0  | 0  | 0  | 0  | 0  | 0         | 0                | -1      |
| AT2G31070 | 0 | -1 | 0  | 0  | 0  | 0  | -1 | 0         | 0                | -1      |
| AT2G31085 | 0 | 1  | 0  | 1  | 0  | 0  | 0  | 0         | 0                | 1       |
| AT2G31230 | 0 | 0  | 0  | -1 | 0  | 0  | 0  | 0         | 0                | -1      |
| AT2G31380 | 0 | -1 | 0  | -1 | 0  | -1 | -1 | 0         | -1               | -1      |
| AT2G31400 | 0 | 0  | 0  | 0  | 0  | -1 | 0  | 0         | 0                | -1      |
| AT2G31560 | 0 | -1 | 0  | 0  | 0  | 0  | 0  | 0         | 0                | -1      |
| AT2G31790 | 0 | -1 | 0  | 0  | 0  | 0  | 0  | 0         | 0                | -1      |
| AT2G31865 | 0 | -1 | 0  | -1 | 0  | 0  | 0  | 0         | 0                | -1      |
| AT2G31945 | 0 | 1  | 0  | 1  | 0  | 0  | 0  | 0         | 0                | 1       |
| AT2G31980 | 0 | 1  | 0  | 1  | 0  | 1  | 1  | 0         | 1                | 1       |
| AT2G32020 | 0 | 0  | 0  | -1 | 0  | 0  | 0  | 0         | 0                | -1      |
| AT2G32060 | 0 | -1 | 0  | 0  | 0  | 0  | 0  | 0         | 0                | -1      |
| AT2G32100 | 0 | -1 | -1 | -1 | -1 | 0  | -1 | 0         | 0                | -1      |
| AT2G32180 | 0 | 0  | 0  | -1 | 0  | 0  | 0  | 0         | 0                | -1      |
| AT2G32210 | 0 | -1 | 0  | 0  | 0  | 0  | 0  | 0         | 0                | -1      |
| AT2G32220 | 0 | -1 | 0  | 0  | 0  | 0  | 0  | 0         | 0                | -1      |
| AT2G32300 | 0 | 0  | 0  | 1  | 0  | 0  | 1  | 0         | 0                | 1       |
| AT2G32430 | 0 | 1  | 0  | 1  | 0  | 0  | 1  | 0         | 0                | 1       |
| AT2G32500 | 0 | 0  | 0  | 0  | 0  | 0  | -1 | 0         | 0                | -1      |
| AT2G32510 | 0 | -1 | 0  | 0  | 0  | 0  | 0  | 0         | 0                | -1      |
| AT2G32540 | 0 | -1 | 0  | -1 | 0  | 0  | -1 | 0         | 0                | -1      |
| AT2G32550 | 0 | -1 | 0  | 0  | 0  | 0  | 0  | 0         | 0                | -1      |
| AT2G32560 | 0 | 0  | 0  | 0  | 0  | 0  | -1 | 0         | 0                | -1      |
| AT2G32610 | 0 | 1  | 0  | 0  | 0  | 0  | 1  | 0         | 0                | 1       |
| AT2G32640 | 0 | 0  | 0  | 0  | 0  | 0  | -1 | 0         | 0                | -1      |
| AT2G32860 | 0 | 0  | 0  | -1 | 0  | 0  | 0  | 0         | 0                | -1      |
| AT2G32870 | 0 | 0  | 0  | -1 | 0  | 0  | 0  | 0         | 0                | -1      |
| AT2G32880 | 0 | -1 | 0  | -1 | 0  | 0  | 0  | 0         | 0                | -1      |
| AT2G32990 | 1 | 1  | 0  | 1  | 0  | 1  | 1  | 0         | 0                | 1       |
| AT2G33180 | 0 | 0  | 0  | 0  | 0  | 0  | -1 | 0         | 0                | -1      |
| AT2G33230 | 0 | -1 | 0  | 0  | 0  | 0  | 0  | 0         | 0                | -1      |
| AT2G33330 | 0 | -1 | 0  | -1 | 0  | 0  | -1 | 0         | 0                | -1      |
| AT2G33370 | 0 | -1 | 0  | 0  | 0  | 0  | 0  | 0         | 0                | -1      |
| AT2G33380 | 1 | 1  | 0  | 1  | 0  | 1  | 1  | 0         | 0                | 1       |
| AT2G33400 | 0 | -1 | 0  | 0  | 0  | 0  | 0  | 0         | 0                | -1      |
| AT2G33570 | 1 | 0  | 0  | 0  | 0  | 0  | 0  | 1         | 0                | 1       |
| AT2G33790 | 0 | -1 | 0  | 0  | 0  | 0  | 0  | 0         | 0                | -1      |
| AT2G33847 | 0 | -1 | 0  | 0  | 0  | 0  | 0  | 0         | 0                | -1      |
| AT2G33880 | 0 | -1 | 0  | 0  | 0  | 0  | 0  | 0         | 0                | -1      |
| AT2G34070 | 1 | 1  | 0  | 0  | 0  | 0  | 0  | 0         | 0                | 1       |
| AT2G34170 | 0 | 0  | 0  | -1 | 0  | 0  | 0  | 0         | 0                | -1      |
| AT2G34300 | 1 | 1  | 0  | 0  | 0  | 0  | 1  | 0         | 0                | 1       |
| AT2G34420 | 0 | -1 | -1 | -1 | 0  | -1 | 0  | 0         | 0                | -1      |
| AT2G34430 | 0 | -1 | -1 | -1 | 0  | -1 | -1 | -1        | -1               | -1      |
| AT2G34460 | 0 | 0  | 0  | 0  | 0  | 0  | -1 | 0         | 0                | -1      |
| AT2G34500 | 0 | 1  | 0  | 1  | 0  | 0  | 1  | 0         | 0                | 1       |
| AT2G34510 | 0 | -1 | 0  | -1 | 0  | 0  | -1 | 0         | 0                | -1      |
| AT2G34530 | 0 | 0  | 0  | -1 | 0  | 0  | 0  | 0         | 0                | -1      |
| AT2G34540 | 0 | -1 | 0  | 0  | 0  | 0  | 0  | 0         | 0                | -1      |
| AT2G34610 | 0 | 1  | 0  | 1  | 0  | 0  | 0  | 0         | 0                | 1       |
| AT2G34620 | 0 | -1 | -1 | -1 | 0  | -1 | -1 | 0         | -1               | -1      |
| AT2G34650 | 0 | 0  | 0  | 1  | 0  | 0  | 1  | 0         | 0                | 1       |
| AT2G34810 | 0 | -1 | 0  | 0  | 0  | 0  | 0  | 0         | 0                | -1      |
| AT2G34860 | 0 | 0  | 0  | 0  | 0  | 0  | -1 | 0         | 0                | -1      |





Appendix Table S2

| Name      | 1  | 2  | 3  | 4  | 5 | 6 | 7  | pif45_Col | pif45bes1D_bes1D | ALL_PIF |
|-----------|----|----|----|----|---|---|----|-----------|------------------|---------|
| AT2G42980 | 0  | 0  | 0  | -1 | 0 | 0 | 0  | 0         | 0                | -1      |
| AT2G43000 | 0  | 0  | 0  | -1 | 0 | 0 | 0  | 0         | 0                | -1      |
| AT2G43050 | 0  | 1  | 0  | 1  | 1 | 1 | 1  | 0         | 0                | 1       |
| AT2G43060 | 1  | 1  | 0  | 1  | 0 | 1 | 1  | 0         | 0                | 1       |
| AT2G43140 | 0  | 0  | 0  | -1 | 0 | 0 | -1 | 0         | 0                | -1      |
| AT2G43220 | 0  | 0  | 0  | -1 | 0 | 0 | 0  | 0         | 0                | -1      |
| AT2G43480 | 0  | -1 | 0  | 0  | 0 | 0 | 0  | 0         | 0                | -1      |
| AT2G43510 | 0  | 0  | 0  | 1  | 0 | 0 | 1  | 0         | 0                | 1       |
| AT2G43520 | 0  | -1 | 0  | -1 | 0 | 0 | -1 | 0         | 0                | -1      |
| AT2G43530 | 0  | 0  | 0  | -1 | 0 | 0 | -1 | 0         | 0                | -1      |
| AT2G43535 | -1 | 0  | 0  | 0  | 0 | 0 | 0  | 0         | 0                | -1      |
| AT2G43560 | 0  | 0  | -1 | 0  | 0 | 0 | -1 | 0         | 0                | -1      |
| AT2G43600 | 0  | -1 | 0  | 0  | 0 | 0 | 0  | 0         | 0                | -1      |
| AT2G43620 | 0  | 0  | 0  | -1 | 0 | 0 | 0  | 0         | 0                | -1      |
| AT2G43780 | 0  | -1 | 0  | 0  | 0 | 0 | 0  | 0         | 0                | -1      |
| AT2G43800 | 0  | -1 | 0  | 0  | 0 | 0 | -1 | 0         | 0                | -1      |
| AT2G43820 | -1 | 0  | 0  | 0  | 0 | 0 | 0  | 0         | 0                | -1      |
| AT2G43860 | 0  | 0  | 0  | -1 | 0 | 0 | 0  | 0         | 0                | -1      |
| AT2G43880 | 0  | -1 | 0  | 0  | 0 | 0 | 0  | 0         | 0                | -1      |
| AT2G44110 | 0  | 0  | 0  | -1 | 0 | 0 | 0  | 0         | 0                | -1      |
| AT2G44190 | 0  | -1 | 0  | 0  | 0 | 0 | 0  | 0         | 0                | -1      |
| AT2G44210 | 0  | 0  | 0  | 0  | 0 | 0 | -1 | 0         | 0                | -1      |
| AT2G44220 | 0  | 0  | 0  | -1 | 0 | 0 | 0  | 0         | 0                | -1      |
| AT2G44230 | 0  | 0  | 0  | -1 | 0 | 0 | -1 | 0         | 0                | -1      |
| AT2G44290 | 0  | -1 | 0  | 0  | 0 | 0 | 0  | 0         | 0                | -1      |
| AT2G44370 | 0  | 0  | 0  | -1 | 0 | 0 | 0  | 0         | 0                | -1      |
| AT2G44570 | 0  | 1  | 0  | 1  | 0 | 1 | 0  | 1         | 0                | 1       |
| AT2G44578 | 0  | 0  | 0  | 0  | 0 | 0 | 0  | -1        | 0                | -1      |
| AT2G44630 | 0  | -1 | 0  | 0  | 0 | 0 | 0  | 0         | 0                | -1      |
| AT2G44690 | 0  | 0  | 0  | 0  | 0 | 0 | -1 | 0         | 0                | -1      |
| AT2G44910 | 1  | 1  | 0  | 1  | 0 | 0 | 0  | 0         | 0                | 1       |
| AT2G44930 | 0  | 0  | 0  | -1 | 0 | 0 | 0  | 0         | 0                | -1      |
| AT2G45120 | 0  | 0  | 0  | -1 | 0 | 0 | 0  | 0         | 0                | -1      |
| AT2G45170 | 0  | 0  | 0  | 0  | 0 | 0 | 0  | -1        | 0                | -1      |
| AT2G45180 | 0  | 0  | 0  | 0  | 0 | 0 | -1 | 0         | 0                | -1      |
| AT2G45550 | 0  | 0  | 0  | -1 | 0 | 0 | 0  | 0         | 0                | -1      |
| AT2G45660 | 0  | 0  | 0  | -1 | 0 | 0 | 0  | 0         | 0                | -1      |
| AT2G45685 | 0  | -1 | 0  | 0  | 0 | 0 | 0  | 0         | 0                | -1      |
| AT2G45780 | 0  | -1 | 0  | 0  | 0 | 0 | 0  | 0         | 0                | -1      |
| AT2G45800 | 0  | 0  | 0  | -1 | 0 | 0 | 0  | 0         | 0                | -1      |
| AT2G45850 | 0  | 0  | 0  | 0  | 0 | 0 | -1 | 0         | 0                | -1      |
| AT2G46070 | 0  | 0  | 0  | -1 | 0 | 0 | 0  | 0         | 0                | -1      |
| AT2G46160 | 0  | 0  | 0  | -1 | 0 | 0 | 0  | 0         | 0                | -1      |
| AT2G46220 | -1 | 0  | 0  | 0  | 0 | 0 | -1 | 0         | 0                | -1      |
| AT2G46270 | 0  | 1  | 0  | 0  | 0 | 0 | 1  | 0         | 0                | 1       |
| AT2G46430 | 0  | 0  | 0  | -1 | 0 | 0 | 0  | 0         | 0                | -1      |
| AT2G46440 | 0  | 0  | 0  | -1 | 0 | 0 | 0  | 0         | 0                | -1      |
| AT2G46450 | 0  | -1 | 0  | -1 | 0 | 0 | -1 | 0         | 0                | -1      |
| AT2G46455 | 0  | 0  | 0  | -1 | 0 | 0 | 0  | 0         | 0                | -1      |
| AT2G46630 | 0  | -1 | 0  | 0  | 0 | 0 | 0  | 0         | 0                | -1      |
| AT2G46660 | 0  | 1  | 0  | 1  | 0 | 0 | 0  | 0         | 0                | 1       |
| AT2G46670 | 0  | 0  | 0  | -1 | 0 | 0 | 0  | 0         | 0                | -1      |
| AT2G46680 | 0  | 0  | 0  | 1  | 0 | 0 | 1  | 0         | 0                | 1       |
| AT2G46790 | 0  | 0  | 0  | -1 | 0 | 0 | 0  | 0         | 0                | -1      |
| AT2G46820 | 0  | 0  | 0  | 0  | 0 | 0 | -1 | 0         | 0                | -1      |
| AT2G46830 | 0  | 0  | 0  | 0  | 0 | 0 | -1 | 0         | 0                | -1      |
| AT2G46850 | 0  | 0  | 0  | -1 | 0 | 0 | 0  | 0         | 0                | -1      |
| AT2G46970 | 0  | 1  | 0  | 1  | 0 | 1 | 0  | 1         | 1                | 1       |
| AT2G47000 | 0  | 0  | 0  | 1  | 0 | 0 | 1  | 0         | 0                | 1       |
| AT2G47050 | 0  | -1 | 0  | 0  | 0 | 0 | 0  | 0         | 0                | -1      |
| AT2G47160 | 0  | 1  | 0  | 1  | 0 | 1 | 1  | 0         | 0                | 1       |

Appendix Table S2

| Name      | 1 | 2  | 3  | 4  | 5  | 6  | 7  | pif45_Col | pif45bes1D_bes1D | ALL_PIF |
|-----------|---|----|----|----|----|----|----|-----------|------------------|---------|
| AT2G47260 | 0 | 0  | 0  | -1 | 0  | 0  | 0  | 0         | 0                | -1      |
| AT2G47270 | 0 | 1  | 1  | 1  | 0  | 0  | 0  | 0         | 0                | 1       |
| AT2G47450 | 0 | -1 | -1 | -1 | 0  | 0  | -1 | 0         | 0                | -1      |
| AT2G47520 | 0 | -1 | 0  | 0  | 0  | 0  | 0  | 0         | 0                | -1      |
| AT2G47550 | 0 | 0  | 0  | -1 | 0  | 0  | 0  | 0         | 0                | -1      |
| AT2G47560 | 0 | 0  | 0  | -1 | 0  | 0  | 0  | 0         | 0                | -1      |
| AT2G47590 | 0 | 0  | -1 | 0  | 0  | 0  | 0  | 0         | 0                | -1      |
| AT2G47750 | 0 | -1 | 0  | 0  | 0  | 0  | 0  | 0         | 0                | -1      |
| AT2G47780 | 0 | 0  | 1  | 1  | 0  | 0  | 1  | 1         | 1                | 1       |
| AT2G47840 | 0 | -1 | 0  | 0  | 0  | 0  | 0  | 0         | 0                | -1      |
| AT2G48070 | 0 | 0  | 0  | 0  | 0  | -1 | 0  | 0         | 0                | -1      |
| AT2G48080 | 0 | -1 | 0  | 0  | 0  | 0  | 0  | 0         | 0                | -1      |
| AT3G01015 | 0 | -1 | 0  | 0  | 0  | 0  | 0  | 0         | 0                | -1      |
| AT3G01060 | 0 | 0  | 0  | 0  | 0  | 0  | -1 | 0         | 0                | -1      |
| AT3G01070 | 0 | -1 | 0  | 0  | 0  | 0  | 0  | 0         | 0                | -1      |
| AT3G01140 | 0 | -1 | 0  | 0  | 0  | 0  | 0  | 0         | 0                | -1      |
| AT3G01220 | 0 | 1  | 0  | 1  | 0  | 0  | 1  | 0         | 0                | 1       |
| AT3G01440 | 0 | 0  | 0  | 0  | 0  | 0  | -1 | 0         | 0                | -1      |
| AT3G01480 | 0 | 0  | 0  | 0  | 0  | 0  | -1 | 0         | 0                | -1      |
| AT3G01500 | 0 | -1 | -1 | 0  | 0  | -1 | -1 | 0         | 0                | -1      |
| AT3G01510 | 0 | 0  | -1 | 0  | 0  | 0  | 0  | 0         | 0                | -1      |
| AT3G01550 | 0 | 0  | 0  | 0  | -1 | 0  | 0  | 0         | 0                | -1      |
| AT3G01600 | 0 | 0  | 0  | -1 | 0  | 0  | 0  | 0         | 0                | -1      |
| AT3G01660 | 0 | 0  | 0  | 0  | 0  | 0  | -1 | 0         | 0                | -1      |
| AT3G01960 | 0 | 0  | 0  | -1 | 0  | 0  | 0  | 0         | 0                | -1      |
| AT3G01990 | 0 | 0  | 0  | 0  | 0  | 0  | 0  | 0         | -1               | -1      |
| AT3G02020 | 0 | -1 | 0  | 0  | 0  | 0  | -1 | 0         | 0                | -1      |
| AT3G02110 | 0 | 0  | 0  | 0  | 0  | 0  | -1 | 0         | 0                | -1      |
| AT3G02120 | 0 | -1 | 0  | 0  | 0  | 0  | 0  | 0         | 0                | -1      |
| AT3G02170 | 1 | 0  | 0  | 0  | 1  | 0  | 0  | 0         | 0                | 1       |
| AT3G02330 | 0 | 0  | 0  | -1 | 0  | 0  | 0  | 0         | 0                | -1      |
| AT3G02380 | 0 | -1 | -1 | 0  | 0  | 0  | -1 | 0         | 0                | -1      |
| AT3G02620 | 0 | 0  | 0  | -1 | 0  | 0  | 0  | 0         | 0                | -1      |
| AT3G02670 | 0 | -1 | -1 | 0  | 0  | 0  | -1 | 0         | 0                | -1      |
| AT3G02690 | 0 | 0  | 0  | 0  | 0  | 0  | -1 | 0         | 0                | -1      |
| AT3G02730 | 0 | -1 | -1 | 0  | 0  | 0  | -1 | 0         | 0                | -1      |
| AT3G02830 | 0 | -1 | 0  | -1 | 0  | 0  | -1 | 0         | 0                | -1      |
| AT3G02832 | 0 | -1 | 0  | 0  | 0  | 0  | 0  | 0         | 0                | -1      |
| AT3G02840 | 0 | 0  | 0  | 0  | 0  | 0  | 0  | -1        | 0                | -1      |
| AT3G02870 | 0 | -1 | 0  | 0  | 0  | 0  | 0  | 0         | 0                | -1      |
| AT3G02885 | 0 | -1 | 0  | 0  | 0  | 0  | 0  | 0         | 0                | -1      |
| AT3G03060 | 0 | -1 | 0  | 0  | 0  | 0  | 0  | 0         | 0                | -1      |
| AT3G03130 | 0 | -1 | 0  | 0  | 0  | 0  | 0  | 0         | 0                | -1      |
| AT3G03170 | 0 | 0  | 0  | 1  | 0  | 0  | 1  | 0         | 0                | 1       |
| AT3G03240 | 0 | 1  | 0  | 1  | 0  | 0  | 0  | 0         | 0                | 1       |
| AT3G03270 | 0 | -1 | 0  | 0  | 0  | 0  | 0  | 0         | 0                | -1      |
| AT3G03341 | 0 | -1 | 0  | 0  | 0  | 0  | 0  | 0         | 0                | -1      |
| AT3G03470 | 0 | 0  | 1  | 0  | 0  | 0  | 1  | 0         | 0                | 1       |
| AT3G03670 | 0 | 0  | 0  | -1 | 0  | 0  | 0  | 0         | -1               | -1      |
| AT3G03680 | 0 | -1 | 0  | 0  | 0  | 0  | 0  | 0         | 0                | -1      |
| AT3G03770 | 0 | 0  | 0  | 0  | 0  | 0  | -1 | 0         | 0                | -1      |
| AT3G03776 | 0 | 0  | 0  | -1 | 0  | 0  | 0  | 0         | 0                | -1      |
| AT3G03830 | 1 | 0  | 0  | 1  | 0  | 0  | 0  | 0         | 0                | 1       |
| AT3G03840 | 1 | 0  | 0  | 1  | 0  | 0  | 0  | 0         | 0                | 1       |
| AT3G03855 | 0 | 0  | 0  | -1 | 0  | 0  | 0  | 0         | 0                | -1      |
| AT3G03920 | 0 | -1 | 0  | 0  | 0  | 0  | 0  | 0         | 0                | -1      |
| AT3G04000 | 0 | -1 | 0  | 0  | 0  | 0  | 0  | 0         | 0                | -1      |
| AT3G04010 | 0 | 1  | 0  | 1  | 0  | 0  | 1  | 0         | 0                | 1       |
| AT3G04060 | 0 | 0  | 0  | 1  | 0  | 0  | 1  | 0         | 0                | 1       |
| AT3G04290 | 0 | -1 | -1 | 0  | 0  | -1 | -1 | 0         | 0                | -1      |
| AT3G04320 | 0 | 0  | 0  | -1 | 0  | 0  | 0  | 0         | 0                | -1      |







Appendix Table S2

| Name      | 1 | 2  | 3  | 4  | 5  | 6  | 7  | pif45_Col | pif45bes1D_bes1D | ALL_PIF |
|-----------|---|----|----|----|----|----|----|-----------|------------------|---------|
| AT3G15360 | 0 | 0  | 0  | 0  | 0  | 0  | -1 | 0         | 0                | -1      |
| AT3G15370 | 0 | 0  | 0  | 1  | 0  | 0  | 0  | 1         | 0                | 1       |
| AT3G15450 | 0 | 1  | 0  | 0  | 0  | 0  | 1  | 0         | 0                | 1       |
| AT3G15520 | 0 | 0  | -1 | 0  | 0  | 0  | 0  | 0         | 0                | -1      |
| AT3G15540 | 1 | 1  | 1  | 1  | 1  | 0  | 1  | 0         | 0                | 1       |
| AT3G15570 | 0 | -1 | 0  | 0  | 0  | 0  | -1 | 0         | 0                | -1      |
| AT3G15650 | 0 | -1 | 0  | 0  | 0  | 0  | 0  | 0         | 0                | -1      |
| AT3G15680 | 0 | -1 | 0  | 0  | 0  | 0  | 0  | 0         | 0                | -1      |
| AT3G15720 | 0 | 0  | 0  | 0  | 0  | 0  | -1 | 0         | 0                | -1      |
| AT3G15840 | 0 | 0  | 0  | -1 | 0  | 0  | -1 | 0         | 0                | -1      |
| AT3G15850 | 0 | -1 | 0  | -1 | -1 | -1 | -1 | -1        | 0                | -1      |
| AT3G15950 | 0 | 0  | 0  | -1 | 0  | 0  | 0  | 0         | 0                | -1      |
| AT3G15990 | 0 | 0  | 0  | -1 | 0  | 0  | -1 | 0         | 0                | -1      |
| AT3G16000 | 0 | 0  | -1 | -1 | 0  | 0  | -1 | 0         | 0                | -1      |
| AT3G16010 | 0 | 0  | 0  | 0  | 0  | 0  | -1 | 0         | 0                | -1      |
| AT3G16080 | 0 | -1 | 0  | 0  | 0  | 0  | 0  | 0         | 0                | -1      |
| AT3G16130 | 0 | 0  | 0  | -1 | 0  | 0  | 0  | 0         | 0                | -1      |
| AT3G16140 | 0 | -1 | -1 | 0  | 0  | 0  | -1 | 0         | 0                | -1      |
| AT3G16180 | 0 | 1  | 0  | 1  | 0  | 0  | 1  | 0         | 0                | 1       |
| AT3G16220 | 0 | 0  | 0  | 0  | 0  | 0  | -1 | 0         | 0                | -1      |
| AT3G16250 | 0 | 0  | -1 | 0  | 0  | 0  | -1 | 0         | 0                | -1      |
| AT3G16350 | 0 | 0  | 0  | 1  | 0  | 0  | 1  | 0         | 0                | 1       |
| AT3G16360 | 0 | -1 | 0  | 0  | 0  | 0  | 0  | 0         | 0                | -1      |
| AT3G16380 | 0 | 0  | 0  | -1 | 0  | 0  | 0  | 0         | 0                | -1      |
| AT3G16410 | 0 | -1 | 0  | 0  | 0  | 0  | 0  | 0         | 0                | -1      |
| AT3G16470 | 0 | -1 | 0  | 0  | 0  | 0  | -1 | 0         | 0                | -1      |
| AT3G16520 | 0 | -1 | 0  | -1 | 0  | 0  | -1 | 0         | 0                | -1      |
| AT3G16660 | 0 | -1 | 0  | -1 | 0  | -1 | 0  | 0         | 0                | -1      |
| AT3G16670 | 0 | -1 | 0  | -1 | -1 | -1 | -1 | 0         | 0                | -1      |
| AT3G16750 | 0 | 0  | 0  | -1 | 0  | 0  | 0  | 0         | 0                | -1      |
| AT3G16780 | 0 | -1 | 0  | 0  | 0  | 0  | 0  | 0         | 0                | -1      |
| AT3G16800 | 1 | 0  | 0  | 1  | 0  | 0  | 0  | 0         | 0                | 1       |
| AT3G16870 | 0 | -1 | 0  | -1 | 0  | 0  | 0  | 0         | 0                | -1      |
| AT3G17010 | 0 | 1  | 0  | 1  | 0  | 0  | 0  | 0         | 0                | 1       |
| AT3G17040 | 0 | -1 | -1 | -1 | 0  | 0  | -1 | 0         | 0                | -1      |
| AT3G17050 | 0 | 1  | 0  | 1  | 0  | 0  | 0  | 0         | 0                | 1       |
| AT3G17110 | 0 | 1  | 0  | 1  | 0  | 0  | 0  | 0         | 0                | 1       |
| AT3G17120 | 1 | 0  | 0  | 1  | 0  | 0  | 0  | 0         | 1                | 1       |
| AT3G17170 | 0 | 0  | 0  | 0  | 0  | -1 | 0  | 0         | 0                | -1      |
| AT3G17350 | 0 | 0  | 0  | -1 | 0  | 0  | 0  | 0         | 0                | -1      |
| AT3G17420 | 0 | 0  | 0  | 1  | 0  | 0  | 1  | 0         | 0                | 1       |
| AT3G17510 | 0 | 0  | 0  | 0  | 0  | 0  | -1 | 0         | 0                | -1      |
| AT3G17580 | 0 | 1  | 0  | 1  | 0  | 1  | 0  | 0         | 0                | 1       |
| AT3G17609 | 0 | 0  | 0  | 0  | 0  | 0  | 0  | 0         | -1               | -1      |
| AT3G17690 | 0 | -1 | 0  | 0  | 0  | 0  | 0  | 0         | 0                | -1      |
| AT3G17790 | 0 | 0  | 0  | 1  | 0  | 0  | 1  | 0         | 0                | 1       |
| AT3G18130 | 0 | -1 | 0  | 0  | 0  | 0  | 0  | 0         | 0                | -1      |
| AT3G18250 | 0 | 0  | 0  | 0  | 0  | 0  | 0  | 0         | -1               | -1      |
| AT3G18320 | 0 | 0  | 0  | -1 | 0  | 0  | 0  | 0         | 0                | -1      |
| AT3G18510 | 0 | 0  | 0  | -1 | 0  | 0  | 0  | 0         | 0                | -1      |
| AT3G18530 | 0 | 1  | 1  | 0  | 0  | 0  | 1  | 0         | 0                | 1       |
| AT3G18890 | 0 | -1 | -1 | 0  | 0  | 0  | -1 | 0         | 0                | -1      |
| AT3G18900 | 0 | -1 | 0  | -1 | 0  | 0  | 0  | 0         | 0                | -1      |
| AT3G18950 | 0 | 1  | 0  | 1  | 0  | 0  | 0  | 0         | 0                | 1       |
| AT3G18960 | 0 | 0  | 0  | 0  | 0  | 0  | -1 | 0         | 0                | -1      |
| AT3G18980 | 0 | 0  | 0  | 0  | 0  | 0  | -1 | 0         | 0                | -1      |
| AT3G19000 | 0 | 0  | 0  | 0  | 0  | 0  | -1 | 0         | 0                | -1      |
| AT3G19030 | 0 | 0  | 0  | -1 | 0  | 0  | -1 | 0         | 0                | -1      |
| AT3G19040 | 0 | 0  | 0  | -1 | 0  | 0  | 0  | 0         | 0                | -1      |
| AT3G19250 | 0 | 0  | 0  | -1 | 0  | 0  | 0  | 0         | 0                | -1      |
| AT3G19430 | 0 | -1 | 0  | 0  | -1 | 0  | 0  | 0         | 0                | -1      |



Appendix Table S2

| Name      | 1  | 2  | 3  | 4  | 5  | 6  | 7  | pif45_Col | pif45bes1D_bes1D | ALL_PIF |
|-----------|----|----|----|----|----|----|----|-----------|------------------|---------|
| AT3G23410 | -1 | -1 | -1 | -1 | 0  | 0  | -1 | 0         | 0                | -1      |
| AT3G23470 | 0  | 0  | 0  | -1 | 0  | 0  | 0  | 0         | 0                | -1      |
| AT3G23550 | -1 | 0  | 0  | 0  | 0  | 0  | 0  | 0         | 0                | -1      |
| AT3G23570 | 0  | 0  | 0  | -1 | 0  | 0  | 0  | 0         | 0                | -1      |
| AT3G23580 | 0  | -1 | 0  | 0  | 0  | 0  | 0  | 0         | 0                | -1      |
| AT3G23800 | 0  | 0  | 0  | 1  | 0  | 0  | 1  | 0         | 0                | 1       |
| AT3G23810 | 1  | 0  | 0  | 1  | 0  | 0  | 1  | 1         | 0                | 1       |
| AT3G23830 | 0  | -1 | 0  | -1 | 0  | 0  | 0  | 0         | 0                | -1      |
| AT3G23840 | 0  | -1 | 0  | 0  | 0  | 0  | 0  | 0         | 0                | -1      |
| AT3G23880 | 0  | 0  | 0  | 0  | 0  | 0  | -1 | 0         | 0                | -1      |
| AT3G23990 | 0  | -1 | 0  | 0  | 0  | 0  | 0  | 0         | 0                | -1      |
| AT3G24450 | 0  | 1  | 0  | 1  | 0  | 0  | 0  | 0         | 0                | 1       |
| AT3G24510 | 0  | 0  | 0  | 0  | 0  | 0  | 0  | 0         | -1               | -1      |
| AT3G24715 | 0  | 1  | 0  | 1  | 0  | 0  | 0  | 0         | 0                | 1       |
| AT3G24750 | 0  | 0  | 0  | 1  | 0  | 0  | 1  | 0         | 0                | 1       |
| AT3G24780 | 0  | -1 | 0  | 0  | 0  | 0  | 0  | 0         | 0                | -1      |
| AT3G24830 | 0  | -1 | 0  | 0  | 0  | 0  | 0  | 0         | 0                | -1      |
| AT3G24840 | 0  | 1  | 0  | 1  | 0  | 0  | 1  | 0         | 0                | 1       |
| AT3G25020 | 0  | -1 | 0  | 0  | 0  | 0  | 0  | 0         | 0                | -1      |
| AT3G25190 | 0  | 0  | 0  | 0  | -1 | 0  | 0  | 0         | 0                | -1      |
| AT3G25250 | 0  | 0  | 0  | -1 | 0  | 0  | 0  | 0         | 0                | -1      |
| AT3G25290 | 0  | 0  | 0  | 1  | 0  | 0  | 1  | 0         | 0                | 1       |
| AT3G25690 | 0  | 0  | 0  | 0  | 0  | 0  | -1 | 0         | 0                | -1      |
| AT3G25730 | 0  | 1  | 0  | 1  | 0  | 1  | 1  | 0         | 0                | 1       |
| AT3G25760 | 0  | 0  | 0  | -1 | 0  | 0  | -1 | 0         | 0                | -1      |
| AT3G25770 | 0  | -1 | 0  | 0  | 0  | -1 | 0  | 0         | 0                | -1      |
| AT3G25790 | 0  | -1 | 0  | 0  | 0  | 0  | 0  | 0         | 0                | -1      |
| AT3G25890 | 0  | 0  | 0  | -1 | 0  | 0  | 0  | 0         | 0                | -1      |
| AT3G25920 | 0  | 0  | 0  | 0  | 0  | -1 | 0  | 0         | 0                | -1      |
| AT3G26050 | 0  | -1 | 0  | 0  | 0  | 0  | 0  | 0         | 0                | -1      |
| AT3G26060 | 0  | 0  | -1 | 0  | 0  | 0  | 0  | 0         | 0                | -1      |
| AT3G26230 | 0  | 0  | 0  | 0  | 0  | 0  | 0  | 0         | -1               | -1      |
| AT3G26290 | 0  | 0  | 0  | -1 | 0  | 0  | 0  | 0         | 0                | -1      |
| AT3G26320 | -1 | -1 | 0  | -1 | 0  | 0  | 0  | 0         | 0                | -1      |
| AT3G26520 | 0  | 0  | 0  | 0  | 0  | -1 | 0  | 0         | 0                | -1      |
| AT3G26570 | 0  | -1 | 0  | 0  | 0  | 0  | -1 | 0         | 0                | -1      |
| AT3G26650 | 0  | 0  | 0  | 0  | 0  | -1 | -1 | 0         | 0                | -1      |
| AT3G26740 | 0  | 0  | 0  | -1 | 0  | 0  | -1 | 0         | 0                | -1      |
| AT3G26782 | 0  | 0  | 0  | -1 | 0  | 0  | 0  | 0         | 0                | -1      |
| AT3G26830 | 0  | 0  | 0  | -1 | 0  | 0  | 0  | -1        | -1               | -1      |
| AT3G26932 | 0  | 0  | 0  | 0  | 0  | 0  | -1 | 0         | 0                | -1      |
| AT3G26960 | 0  | -1 | 0  | 0  | 0  | 0  | 0  | 0         | 0                | -1      |
| AT3G27050 | 0  | 0  | 0  | 0  | 0  | 0  | -1 | 0         | 0                | -1      |
| AT3G27070 | 0  | -1 | 0  | 0  | 0  | 0  | 0  | 0         | 0                | -1      |
| AT3G27210 | 0  | 1  | 0  | 1  | 0  | 0  | 1  | 0         | 0                | 1       |
| AT3G27250 | 0  | 1  | 0  | 1  | 0  | 0  | 0  | 0         | 0                | 1       |
| AT3G27400 | 0  | -1 | 0  | 0  | 0  | 0  | 0  | 0         | 0                | -1      |
| AT3G27550 | 0  | -1 | 0  | 0  | 0  | 0  | 0  | 0         | 0                | -1      |
| AT3G27620 | 0  | -1 | 0  | 0  | 0  | 0  | 0  | 0         | 0                | -1      |
| AT3G27690 | 0  | -1 | -1 | 0  | 0  | -1 | -1 | 0         | -1               | -1      |
| AT3G27750 | 0  | -1 | 0  | 0  | 0  | 0  | 0  | 0         | 0                | -1      |
| AT3G27830 | 0  | 0  | 0  | 0  | 0  | -1 | 0  | 0         | 0                | -1      |
| AT3G27925 | 0  | 0  | 0  | 0  | 0  | 0  | -1 | 0         | 0                | -1      |
| AT3G27950 | 0  | -1 | 0  | -1 | 0  | 0  | 0  | 0         | 0                | -1      |
| AT3G27980 | 0  | 0  | 0  | -1 | 0  | 0  | 0  | 0         | 0                | -1      |
| AT3G28070 | 0  | -1 | 0  | -1 | 0  | 0  | 0  | 0         | 0                | -1      |
| AT3G28080 | 0  | 0  | 0  | -1 | 0  | 0  | 0  | 0         | 0                | -1      |
| AT3G28160 | 0  | 0  | 0  | -1 | 0  | 0  | 0  | 0         | 0                | -1      |
| AT3G28180 | 1  | 0  | 0  | 1  | 1  | 0  | 0  | 0         | 0                | 1       |
| AT3G28220 | 0  | -1 | 0  | 0  | 0  | 0  | -1 | 0         | 0                | -1      |
| AT3G28340 | 0  | 1  | 0  | 1  | 0  | 1  | 1  | 0         | 0                | 1       |

Appendix Table S2

| Name      | 1  | 2  | 3  | 4  | 5 | 6  | 7  | pif45_Col | pif45bes1D_bes1D | ALL_PIF |
|-----------|----|----|----|----|---|----|----|-----------|------------------|---------|
| AT3G28420 | 0  | -1 | 0  | 0  | 0 | 0  | 0  | 0         | 0                | -1      |
| AT3G28580 | 0  | -1 | 0  | -1 | 0 | 0  | 0  | 0         | 0                | -1      |
| AT3G28650 | 0  | 0  | 0  | -1 | 0 | 0  | 0  | 0         | 0                | -1      |
| AT3G28740 | 0  | 1  | 0  | 1  | 0 | 0  | 0  | 0         | 0                | 1       |
| AT3G28857 | 0  | 1  | 0  | 1  | 0 | 1  | 0  | 0         | 0                | 1       |
| AT3G28880 | 0  | 1  | 0  | 1  | 0 | 0  | 0  | 0         | 0                | 1       |
| AT3G28930 | 0  | 0  | 0  | 0  | 0 | 0  | 0  | 0         | -1               | -1      |
| AT3G29000 | 0  | 0  | 0  | 0  | 0 | 0  | 0  | -1        | 0                | -1      |
| AT3G29120 | 0  | 0  | 0  | -1 | 0 | 0  | 0  | 0         | 0                | -1      |
| AT3G29140 | 0  | 0  | 0  | -1 | 0 | 0  | 0  | 0         | 0                | -1      |
| AT3G29240 | 0  | 0  | 0  | 0  | 0 | 0  | -1 | 0         | 0                | -1      |
| AT3G29250 | 0  | 0  | 0  | -1 | 0 | 0  | 0  | 0         | 0                | -1      |
| AT3G29252 | 0  | 0  | 0  | -1 | 0 | 0  | 0  | 0         | 0                | -1      |
| AT3G29320 | 0  | 0  | -1 | 0  | 0 | 0  | 0  | 0         | 0                | -1      |
| AT3G29380 | -1 | 0  | 0  | 0  | 0 | 0  | 0  | 0         | 0                | -1      |
| AT3G29410 | 0  | 1  | 0  | 1  | 0 | 1  | 1  | 0         | 0                | 1       |
| AT3G29575 | 1  | 1  | 0  | 1  | 0 | 0  | 1  | 0         | 0                | 1       |
| AT3G29639 | 0  | 1  | 0  | 1  | 0 | 0  | 0  | 0         | 0                | 1       |
| AT3G29680 | 0  | -1 | 0  | -1 | 0 | 0  | 0  | 0         | 0                | -1      |
| AT3G30180 | 0  | 1  | 0  | 1  | 0 | 0  | 0  | 0         | 0                | 1       |
| AT3G30214 | 0  | 0  | 0  | -1 | 0 | 0  | 0  | 0         | 0                | -1      |
| AT3G30720 | 0  | -1 | 0  | 0  | 0 | 0  | -1 | 0         | 0                | -1      |
| AT3G30737 | 0  | 0  | 0  | -1 | 0 | 0  | 0  | 0         | 0                | -1      |
| AT3G32990 | 0  | 0  | 0  | -1 | 0 | 0  | 0  | 0         | 0                | -1      |
| AT3G41979 | 0  | 0  | 0  | -1 | 0 | 0  | 0  | 0         | 0                | -1      |
| AT3G42725 | 0  | -1 | 0  | 0  | 0 | 0  | 0  | 0         | 0                | -1      |
| AT3G42800 | 1  | 0  | 0  | 1  | 1 | 0  | 0  | 0         | 0                | 1       |
| AT3G43110 | 0  | -1 | 0  | 0  | 0 | 0  | 0  | 0         | 0                | -1      |
| AT3G43270 | 0  | 1  | 0  | 1  | 0 | 1  | 1  | 0         | 0                | 1       |
| AT3G43400 | 0  | 0  | 0  | -1 | 0 | 0  | 0  | 0         | 0                | -1      |
| AT3G43430 | 0  | 1  | 0  | 1  | 0 | 0  | 0  | 0         | 0                | 1       |
| AT3G43670 | 0  | 0  | 0  | 0  | 0 | 0  | -1 | 0         | 0                | -1      |
| AT3G43715 | 0  | -1 | 0  | -1 | 0 | 0  | 0  | 0         | 0                | -1      |
| AT3G43720 | 0  | 0  | 0  | 0  | 0 | 0  | -1 | 0         | 0                | -1      |
| AT3G43800 | 0  | 0  | 0  | 0  | 0 | 0  | -1 | 0         | 0                | -1      |
| AT3G44020 | 0  | 0  | 0  | 0  | 0 | 0  | -1 | 0         | 0                | -1      |
| AT3G44042 | 0  | 0  | 0  | 1  | 0 | 0  | 0  | 1         | 0                | 1       |
| AT3G44320 | 0  | -1 | 0  | 0  | 0 | 0  | 0  | 0         | 0                | -1      |
| AT3G44510 | 0  | 1  | 0  | 1  | 0 | 0  | 1  | 0         | 0                | 1       |
| AT3G44590 | 0  | -1 | 0  | 0  | 0 | 0  | 0  | 0         | 0                | -1      |
| AT3G44630 | 0  | 0  | 0  | 0  | 0 | 0  | -1 | 0         | 0                | -1      |
| AT3G44710 | 0  | -1 | 0  | 0  | 0 | 0  | 0  | 0         | 0                | -1      |
| AT3G44720 | 0  | 0  | 0  | -1 | 0 | 0  | 0  | 0         | 0                | -1      |
| AT3G44735 | 1  | 0  | 0  | 1  | 0 | 0  | 0  | 0         | 0                | 1       |
| AT3G44750 | 0  | -1 | 0  | -1 | 0 | 0  | 0  | 0         | 0                | -1      |
| AT3G44860 | 0  | 0  | 0  | 0  | 0 | 0  | 0  | -1        | 0                | -1      |
| AT3G44960 | 0  | -1 | 0  | 0  | 0 | 0  | 0  | 0         | 0                | -1      |
| AT3G44970 | -1 | 0  | 0  | 0  | 0 | 0  | -1 | 0         | 0                | -1      |
| AT3G45050 | 0  | -1 | 0  | 0  | 0 | -1 | -1 | 0         | 0                | -1      |
| AT3G45070 | 0  | -1 | 0  | 0  | 0 | 0  | 0  | 0         | 0                | -1      |
| AT3G45080 | 0  | -1 | 0  | 0  | 0 | 0  | 0  | 0         | 0                | -1      |
| AT3G45160 | 0  | 0  | -1 | 0  | 0 | 0  | 0  | 0         | 0                | -1      |
| AT3G45210 | 0  | -1 | 0  | 0  | 0 | 0  | -1 | 0         | 0                | -1      |
| AT3G45330 | 0  | 0  | 0  | -1 | 0 | 0  | 0  | 0         | 0                | -1      |
| AT3G45680 | 0  | -1 | 0  | 0  | 0 | 0  | 0  | 0         | 0                | -1      |
| AT3G45700 | 0  | 0  | 0  | 1  | 0 | 0  | 0  | 1         | 0                | 1       |
| AT3G46230 | 0  | 0  | 0  | 0  | 0 | 0  | 1  | 1         | 0                | 1       |
| AT3G46300 | 0  | -1 | 0  | 0  | 0 | 0  | 0  | 0         | 0                | -1      |
| AT3G46400 | 0  | 0  | 0  | -1 | 0 | 0  | 0  | 0         | 0                | -1      |
| AT3G46530 | 0  | 0  | 0  | -1 | 0 | 0  | -1 | 0         | 0                | -1      |
| AT3G46540 | 0  | 0  | 0  | 0  | 0 | 0  | -1 | 0         | 0                | -1      |

Appendix Table S2

| Name      | 1  | 2  | 3  | 4  | 5  | 6  | 7  | pif45_Col | pif45bes1D_bes1D | ALL_PIF |
|-----------|----|----|----|----|----|----|----|-----------|------------------|---------|
| AT3G46630 | 0  | -1 | 0  | 0  | 0  | 0  | -1 | 0         | 0                | -1      |
| AT3G46780 | 0  | -1 | -1 | 0  | 0  | 0  | -1 | 0         | 0                | -1      |
| AT3G46870 | 0  | -1 | 0  | 0  | 0  | 0  | 0  | 0         | 0                | -1      |
| AT3G46890 | 0  | -1 | 0  | 0  | 0  | 0  | 0  | 0         | 0                | -1      |
| AT3G46900 | 0  | -1 | 0  | 0  | -1 | 0  | 0  | 0         | 0                | -1      |
| AT3G46940 | 0  | -1 | 0  | 0  | 0  | 0  | 0  | 0         | 0                | -1      |
| AT3G47070 | 0  | 0  | 0  | 0  | 0  | 0  | -1 | 0         | 0                | -1      |
| AT3G47180 | 0  | 0  | 0  | -1 | 0  | 0  | 0  | 0         | 0                | -1      |
| AT3G47220 | 0  | 1  | 0  | 1  | 0  | 0  | 0  | 0         | 0                | 1       |
| AT3G47250 | 0  | -1 | 0  | -1 | 0  | -1 | -1 | 0         | 0                | -1      |
| AT3G47295 | 0  | 0  | 0  | 0  | 0  | 0  | -1 | 0         | 0                | -1      |
| AT3G47370 | 0  | -1 | 0  | 0  | 0  | 0  | 0  | 0         | 0                | -1      |
| AT3G47380 | 0  | 0  | 0  | 0  | 0  | 0  | -1 | 0         | 0                | -1      |
| AT3G47430 | 0  | 0  | 0  | 0  | 0  | 0  | -1 | 0         | 0                | -1      |
| AT3G47470 | 0  | -1 | 0  | -1 | 0  | -1 | -1 | 0         | -1               | -1      |
| AT3G47480 | 0  | 0  | 0  | -1 | 0  | 0  | 0  | 0         | 0                | -1      |
| AT3G47500 | 0  | 0  | 0  | 0  | 0  | 0  | -1 | 0         | 0                | -1      |
| AT3G47540 | 0  | 0  | 0  | 1  | 0  | 0  | 1  | 0         | 0                | 1       |
| AT3G47560 | 0  | 0  | 0  | 0  | 0  | 0  | -1 | 0         | 0                | -1      |
| AT3G47620 | 0  | 0  | 0  | 0  | 0  | 0  | -1 | 0         | 0                | -1      |
| AT3G47650 | 0  | 0  | -1 | 0  | 0  | 0  | 0  | 0         | 0                | -1      |
| AT3G47750 | 0  | 0  | 0  | -1 | 0  | 0  | 0  | 0         | 0                | -1      |
| AT3G47840 | 0  | 0  | 0  | -1 | 0  | 0  | 0  | 0         | 0                | -1      |
| AT3G48100 | 0  | 0  | 0  | -1 | 0  | 0  | 0  | 0         | 0                | -1      |
| AT3G48200 | 0  | 0  | 0  | 0  | 0  | 0  | -1 | 0         | 0                | -1      |
| AT3G48250 | 0  | 0  | 0  | -1 | 0  | 0  | 0  | 0         | 0                | -1      |
| AT3G48260 | 0  | 1  | 0  | 1  | 0  | 1  | 0  | 0         | 0                | 1       |
| AT3G48280 | 0  | -1 | 0  | 0  | 0  | 0  | 0  | 0         | 0                | -1      |
| AT3G48340 | 0  | -1 | 0  | 0  | 0  | 0  | 0  | 0         | 0                | -1      |
| AT3G48350 | 0  | -1 | 0  | 0  | 0  | -1 | -1 | 0         | 0                | -1      |
| AT3G48360 | 0  | 0  | 0  | 0  | 0  | 0  | -1 | 0         | 0                | -1      |
| AT3G48420 | 0  | 0  | 0  | 0  | 0  | 0  | -1 | 0         | 0                | -1      |
| AT3G48450 | 0  | 0  | 0  | 0  | 0  | 0  | 0  | 0         | -1               | -1      |
| AT3G48460 | 0  | 0  | 0  | 1  | 0  | 0  | 1  | 0         | 0                | 1       |
| AT3G48480 | 0  | -1 | 0  | 0  | 0  | 0  | 0  | 0         | 0                | -1      |
| AT3G48510 | 0  | 1  | 0  | 1  | 0  | 0  | 1  | 0         | 0                | 1       |
| AT3G48540 | 0  | -1 | 0  | 0  | 0  | 0  | 0  | 0         | 0                | -1      |
| AT3G48650 | 0  | 0  | 0  | -1 | 0  | 0  | 0  | 0         | 0                | -1      |
| AT3G48700 | 0  | 0  | 0  | 0  | -1 | 0  | 0  | 0         | 0                | -1      |
| AT3G48720 | 0  | -1 | -1 | -1 | 0  | -1 | -1 | 0         | 0                | -1      |
| AT3G48730 | 0  | 0  | -1 | 0  | 0  | 0  | 0  | 0         | 0                | -1      |
| AT3G48930 | 0  | -1 | 0  | 0  | 0  | 0  | 0  | 0         | 0                | -1      |
| AT3G48940 | 0  | 1  | 0  | 1  | 0  | 0  | 1  | 0         | 0                | 1       |
| AT3G48970 | 1  | 0  | 0  | 1  | 1  | 0  | 0  | 0         | 0                | 1       |
| AT3G49060 | -1 | 0  | 0  | 0  | 0  | 0  | 0  | 0         | 0                | -1      |
| AT3G49140 | 0  | 0  | 0  | 0  | 0  | 0  | -1 | 0         | 0                | -1      |
| AT3G49160 | 0  | 0  | 0  | 0  | 0  | 0  | -1 | 0         | 0                | -1      |
| AT3G49220 | 1  | 0  | 0  | 1  | 0  | 0  | 0  | 0         | 0                | 1       |
| AT3G49260 | 0  | 0  | -1 | 0  | 0  | 0  | -1 | 0         | 0                | -1      |
| AT3G49320 | 0  | -1 | 0  | 0  | 0  | 0  | 0  | 0         | 0                | -1      |
| AT3G49360 | 0  | 1  | 0  | 0  | 0  | 0  | 1  | 0         | 0                | 1       |
| AT3G49620 | 0  | 0  | 0  | -1 | 0  | 0  | 0  | 0         | -1               | -1      |
| AT3G49930 | 0  | 0  | 0  | 1  | 0  | 0  | 1  | 0         | 0                | 1       |
| AT3G49970 | 0  | 1  | 0  | 0  | 0  | 1  | 0  | 0         | 0                | 1       |
| AT3G50010 | 0  | 0  | 0  | -1 | 0  | 0  | 0  | 0         | 0                | -1      |
| AT3G50070 | 0  | -1 | 0  | 0  | 0  | 0  | 0  | 0         | 0                | -1      |
| AT3G50120 | 0  | 1  | 0  | 1  | 0  | 0  | 0  | 0         | 0                | 1       |
| AT3G50160 | 0  | 0  | 0  | -1 | 0  | 0  | 0  | 0         | 0                | -1      |
| AT3G50240 | 0  | 0  | 0  | 0  | 0  | 0  | -1 | 0         | 0                | -1      |
| AT3G50270 | 0  | -1 | 0  | -1 | 0  | -1 | -1 | 0         | 0                | -1      |
| AT3G50330 | 0  | 0  | 0  | 1  | 0  | 1  | 0  | 0         | 0                | 1       |

Appendix Table S2

| Name      | 1  | 2  | 3  | 4  | 5 | 6  | 7  | pif45_Col | pif45bes1D_bes1D | ALL_PIF |
|-----------|----|----|----|----|---|----|----|-----------|------------------|---------|
| AT3G50420 | 0  | 0  | 0  | -1 | 0 | 0  | 0  | 0         | 0                | -1      |
| AT3G50560 | 0  | 0  | 0  | 0  | 0 | 0  | -1 | 0         | 0                | -1      |
| AT3G50570 | -1 | -1 | 0  | 0  | 0 | 0  | 0  | 0         | 0                | -1      |
| AT3G50685 | 0  | -1 | 0  | 0  | 0 | 0  | -1 | 0         | 0                | -1      |
| AT3G50700 | 0  | 0  | 0  | -1 | 0 | 0  | 0  | 0         | 0                | -1      |
| AT3G50750 | 0  | 0  | 0  | 0  | 0 | 0  | -1 | 0         | 0                | -1      |
| AT3G50760 | 1  | 0  | 0  | 1  | 0 | 0  | 0  | 0         | 0                | 1       |
| AT3G50790 | 0  | 0  | 0  | 0  | 0 | 0  | -1 | 0         | 0                | -1      |
| AT3G50800 | 0  | 1  | 0  | 1  | 0 | 0  | 0  | 0         | 0                | 1       |
| AT3G50820 | 0  | -1 | -1 | 0  | 0 | -1 | -1 | 0         | 0                | -1      |
| AT3G50870 | 0  | -1 | 0  | 0  | 0 | 0  | 0  | 0         | 0                | -1      |
| AT3G50890 | 0  | 0  | 0  | 1  | 1 | 0  | 0  | 0         | 0                | 1       |
| AT3G50900 | 0  | 0  | 0  | 1  | 0 | 0  | 1  | 0         | 0                | 1       |
| AT3G51230 | 0  | -1 | 0  | 0  | 0 | 0  | 0  | 0         | 0                | -1      |
| AT3G51350 | 0  | 0  | 0  | -1 | 0 | 0  | 0  | 0         | 0                | -1      |
| AT3G51400 | 0  | 0  | 0  | 1  | 0 | 1  | 0  | 0         | 0                | 1       |
| AT3G51420 | 0  | 0  | 0  | 0  | 0 | 0  | -1 | 0         | 0                | -1      |
| AT3G51480 | 0  | -1 | 0  | 0  | 0 | 0  | 0  | 0         | 0                | -1      |
| AT3G51490 | 0  | 0  | 0  | -1 | 0 | 0  | 0  | 0         | 0                | -1      |
| AT3G51660 | 0  | -1 | 0  | 0  | 0 | 0  | 0  | 0         | 0                | -1      |
| AT3G51720 | 0  | -1 | 0  | 0  | 0 | 0  | 0  | 0         | 0                | -1      |
| AT3G51740 | 0  | -1 | 0  | 0  | 0 | 0  | 0  | 0         | 0                | -1      |
| AT3G51895 | 0  | 1  | 0  | 1  | 0 | 1  | 1  | 0         | 0                | 1       |
| AT3G52070 | 0  | -1 | 0  | 0  | 0 | 0  | -1 | 0         | 0                | -1      |
| AT3G52150 | 0  | 0  | 0  | 0  | 0 | -1 | 0  | 0         | 0                | -1      |
| AT3G52290 | 0  | 0  | 0  | 0  | 0 | 0  | -1 | 0         | 0                | -1      |
| AT3G52340 | 0  | 0  | 0  | 0  | 0 | 0  | -1 | 0         | 0                | -1      |
| AT3G52370 | 0  | 0  | 0  | 1  | 0 | 0  | 1  | 0         | 0                | 1       |
| AT3G52390 | 0  | -1 | 0  | 0  | 0 | 0  | 0  | 0         | 0                | -1      |
| AT3G52525 | 0  | -1 | 0  | 0  | 0 | 0  | 0  | 0         | 0                | -1      |
| AT3G52720 | 0  | 0  | 0  | 0  | 0 | 0  | -1 | 0         | 0                | -1      |
| AT3G52748 | 0  | 0  | 0  | -1 | 0 | 0  | 0  | 0         | 0                | -1      |
| AT3G52910 | 0  | 0  | 0  | -1 | 0 | 0  | 0  | 0         | 0                | -1      |
| AT3G53190 | 0  | -1 | 0  | 0  | 0 | 0  | -1 | 0         | 0                | -1      |
| AT3G53200 | 0  | 1  | 0  | 1  | 0 | 0  | 0  | 0         | 0                | 1       |
| AT3G53250 | 0  | 0  | 0  | 0  | 0 | -1 | -1 | 0         | 0                | -1      |
| AT3G53280 | 0  | 0  | 0  | 0  | 0 | 0  | -1 | 0         | 0                | -1      |
| AT3G53360 | 0  | 0  | 0  | -1 | 0 | 0  | 0  | 0         | 0                | -1      |
| AT3G53430 | 0  | -1 | 0  | 0  | 0 | 0  | 0  | 0         | 0                | -1      |
| AT3G53460 | 0  | 0  | 0  | 0  | 0 | -1 | 0  | 0         | 0                | -1      |
| AT3G53470 | 0  | 0  | 0  | 0  | 0 | 0  | -1 | 0         | 0                | -1      |
| AT3G53480 | 0  | 0  | 0  | 0  | 0 | 0  | -1 | 0         | 0                | -1      |
| AT3G53530 | 0  | 0  | 0  | -1 | 0 | 0  | 0  | 0         | 0                | -1      |
| AT3G53590 | 0  | 0  | 0  | -1 | 0 | 0  | 0  | 0         | 0                | -1      |
| AT3G53600 | 0  | 0  | 0  | 0  | 0 | 0  | 0  | 0         | -1               | -1      |
| AT3G53800 | 0  | 0  | 0  | 0  | 0 | 0  | -1 | 0         | 0                | -1      |
| AT3G53890 | 0  | -1 | 0  | 0  | 0 | 0  | 0  | 0         | 0                | -1      |
| AT3G53920 | 0  | 0  | 0  | 0  | 0 | 0  | -1 | 0         | 0                | -1      |
| AT3G53990 | 0  | 0  | 0  | 1  | 0 | 0  | 1  | 0         | 0                | 1       |
| AT3G54000 | 0  | 1  | 0  | 1  | 0 | 0  | 0  | 0         | 0                | 1       |
| AT3G54050 | 0  | 0  | -1 | 0  | 0 | 0  | -1 | 0         | 0                | -1      |
| AT3G54090 | 0  | 0  | 0  | 0  | 0 | -1 | 0  | 0         | 0                | -1      |
| AT3G54150 | 0  | 0  | 0  | 0  | 0 | 0  | 0  | -1        | 0                | -1      |
| AT3G54200 | 1  | 0  | 0  | 1  | 0 | 0  | 0  | 0         | 0                | 1       |
| AT3G54400 | 1  | 0  | 0  | 1  | 0 | 0  | 0  | 0         | 0                | 1       |
| AT3G54500 | 0  | 0  | 0  | 0  | 0 | 0  | -1 | 0         | 0                | -1      |
| AT3G54510 | 0  | 1  | 1  | 1  | 1 | 1  | 1  | 0         | 0                | 1       |
| AT3G54530 | 0  | 0  | 0  | -1 | 0 | 0  | 0  | 0         | 0                | -1      |
| AT3G54600 | 0  | -1 | 0  | 0  | 0 | 0  | 0  | 0         | 0                | -1      |
| AT3G54710 | 0  | -1 | 0  | 0  | 0 | 0  | 0  | 0         | 0                | -1      |
| AT3G54770 | 0  | 0  | 1  | 1  | 0 | 0  | 1  | 0         | 0                | 1       |

Appendix Table S2

| Name      | 1  | 2  | 3  | 4  | 5 | 6  | 7  | pif45_Col | pif45bes1D_bes1D | ALL_PIF |
|-----------|----|----|----|----|---|----|----|-----------|------------------|---------|
| AT3G54830 | 0  | 1  | 0  | 1  | 0 | 1  | 0  | 0         | 0                | 1       |
| AT3G54890 | 0  | -1 | -1 | -1 | 0 | -1 | -1 | 0         | -1               | -1      |
| AT3G54900 | 0  | -1 | 0  | 0  | 0 | -1 | -1 | 0         | 0                | -1      |
| AT3G55010 | 0  | -1 | 0  | 0  | 0 | 0  | 0  | 0         | 0                | -1      |
| AT3G55040 | 0  | 0  | 0  | 0  | 0 | 0  | -1 | 0         | 0                | -1      |
| AT3G55110 | 0  | -1 | 0  | 0  | 0 | 0  | 0  | 0         | 0                | -1      |
| AT3G55120 | 0  | -1 | 0  | 0  | 0 | 0  | -1 | 0         | 0                | -1      |
| AT3G55130 | 0  | -1 | 0  | 0  | 0 | 0  | -1 | 0         | 0                | -1      |
| AT3G55280 | 0  | -1 | 0  | 0  | 0 | 0  | 0  | 0         | 0                | -1      |
| AT3G55330 | 0  | 0  | 0  | 0  | 0 | 0  | -1 | 0         | 0                | -1      |
| AT3G55500 | 0  | 0  | 0  | -1 | 0 | 0  | 0  | 0         | 0                | -1      |
| AT3G55550 | 0  | 0  | 0  | -1 | 0 | 0  | 0  | 0         | 0                | -1      |
| AT3G55605 | 0  | -1 | 0  | 0  | 0 | 0  | 0  | 0         | 0                | -1      |
| AT3G55630 | 0  | 0  | 0  | 0  | 0 | 0  | -1 | 0         | 0                | -1      |
| AT3G55710 | 0  | -1 | 0  | 0  | 0 | 0  | -1 | 0         | 0                | -1      |
| AT3G55750 | 0  | -1 | 0  | 0  | 0 | 0  | 0  | 0         | 0                | -1      |
| AT3G55790 | 0  | 0  | 0  | 0  | 0 | 0  | 0  | 0         | -1               | -1      |
| AT3G55800 | 0  | 0  | 0  | 0  | 0 | 0  | -1 | 0         | 0                | -1      |
| AT3G55840 | 0  | 0  | 1  | 1  | 0 | 0  | 0  | 0         | 0                | 1       |
| AT3G55940 | 0  | 1  | 1  | 1  | 0 | 1  | 1  | 0         | 0                | 1       |
| AT3G55960 | -1 | 0  | 0  | 0  | 0 | 0  | 0  | 0         | 0                | -1      |
| AT3G55970 | 0  | -1 | 0  | 0  | 0 | 0  | 0  | 0         | -1               | -1      |
| AT3G56010 | 0  | 0  | 0  | 0  | 0 | 0  | -1 | 0         | 0                | -1      |
| AT3G56040 | 0  | 0  | 0  | 0  | 0 | -1 | -1 | 0         | 0                | -1      |
| AT3G56070 | 0  | -1 | 0  | 0  | 0 | 0  | 0  | 0         | 0                | -1      |
| AT3G56080 | 0  | -1 | 0  | 0  | 0 | 0  | -1 | 0         | 0                | -1      |
| AT3G56200 | 1  | 0  | 0  | 1  | 0 | 0  | 0  | 0         | 0                | 1       |
| AT3G56220 | 0  | -1 | 0  | -1 | 0 | 0  | 0  | 0         | 0                | -1      |
| AT3G56330 | 0  | -1 | 0  | -1 | 0 | 0  | 0  | 0         | 0                | -1      |
| AT3G56570 | 0  | 0  | 0  | -1 | 0 | 0  | 0  | 0         | 0                | -1      |
| AT3G56650 | 0  | 0  | 0  | 0  | 0 | 0  | -1 | 0         | 0                | -1      |
| AT3G56705 | 0  | 0  | 0  | -1 | 0 | 0  | 0  | 0         | 0                | -1      |
| AT3G56730 | 0  | -1 | 0  | 0  | 0 | 0  | 0  | 0         | 0                | -1      |
| AT3G56825 | 0  | -1 | 0  | -1 | 0 | 0  | 0  | 0         | 0                | -1      |
| AT3G56940 | 0  | -1 | -1 | -1 | 0 | 0  | -1 | 0         | 0                | -1      |
| AT3G56960 | 0  | 0  | 0  | -1 | 0 | 0  | 0  | 0         | 0                | -1      |
| AT3G56970 | 0  | 0  | 0  | -1 | 0 | 0  | 0  | 0         | 0                | -1      |
| AT3G56980 | 0  | 0  | -1 | 0  | 0 | 0  | 0  | 0         | 0                | -1      |
| AT3G56990 | 0  | -1 | 0  | 0  | 0 | 0  | 0  | 0         | 0                | -1      |
| AT3G57010 | 0  | -1 | 0  | 0  | 0 | 0  | 0  | 0         | 0                | -1      |
| AT3G57020 | 0  | 0  | 0  | -1 | 0 | 0  | 0  | 0         | 0                | -1      |
| AT3G57040 | 0  | 0  | 0  | -1 | 0 | 0  | 0  | 0         | 0                | -1      |
| AT3G57160 | 0  | -1 | 0  | 0  | 0 | 0  | 0  | 0         | 0                | -1      |
| AT3G57370 | -1 | 0  | 0  | 0  | 0 | 0  | 0  | 0         | 0                | -1      |
| AT3G57500 | 0  | -1 | 0  | 0  | 0 | 0  | 0  | 0         | 0                | -1      |
| AT3G57645 | 0  | 0  | 0  | -1 | 0 | 0  | 0  | 0         | 0                | -1      |
| AT3G57765 | 0  | -1 | 0  | 0  | 0 | 0  | 0  | 0         | 0                | -1      |
| AT3G57780 | 0  | 0  | 0  | 1  | 0 | 0  | 1  | 0         | 0                | 1       |
| AT3G58060 | 0  | 0  | 0  | 1  | 0 | 0  | 1  | 0         | 0                | 1       |
| AT3G58070 | 0  | -1 | 0  | 0  | 0 | 0  | 0  | 0         | 0                | -1      |
| AT3G58270 | 0  | -1 | 0  | 0  | 0 | 0  | 0  | 0         | 0                | -1      |
| AT3G58450 | 0  | 1  | 0  | 0  | 0 | 0  | 1  | 0         | 0                | 1       |
| AT3G58610 | 0  | -1 | 0  | 0  | 0 | 0  | 0  | 0         | 0                | -1      |
| AT3G58650 | 0  | -1 | 0  | 0  | 0 | 0  | 0  | 0         | 0                | -1      |
| AT3G58850 | 0  | 1  | 0  | 1  | 0 | 0  | 0  | 0         | 0                | 1       |
| AT3G59060 | 1  | 1  | 0  | 0  | 0 | 0  | 1  | 1         | 1                | 1       |
| AT3G59080 | -1 | 0  | 0  | -1 | 0 | 0  | 0  | 0         | 0                | -1      |
| AT3G59200 | 0  | -1 | 0  | 0  | 0 | 0  | 0  | 0         | 0                | -1      |
| AT3G59250 | 0  | -1 | 0  | -1 | 0 | 0  | 0  | 0         | 0                | -1      |
| AT3G59300 | 0  | 0  | 0  | 0  | 0 | 0  | -1 | 0         | 0                | -1      |
| AT3G59340 | 0  | -1 | 0  | -1 | 0 | 0  | -1 | 0         | 0                | -1      |



Appendix Table S2

| Name      | 1  | 2  | 3  | 4  | 5 | 6  | 7  | pif45_Col | pif45bes1D_bes1D | ALL_PIF |
|-----------|----|----|----|----|---|----|----|-----------|------------------|---------|
| AT3G59370 | 0  | 0  | 1  | 1  | 0 | 0  | 1  | 0         | 0                | 1       |
| AT3G59400 | 0  | -1 | -1 | -1 | 0 | 0  | -1 | 0         | -1               | -1      |
| AT3G59480 | -1 | 0  | 0  | 0  | 0 | 0  | 0  | 0         | 0                | -1      |
| AT3G59690 | 0  | 1  | 0  | 1  | 0 | 1  | 0  | 0         | 0                | 1       |
| AT3G59710 | 0  | 0  | 0  | 1  | 0 | 0  | 1  | 0         | 0                | 1       |
| AT3G59780 | 0  | 0  | 0  | 0  | 0 | 0  | -1 | 0         | 0                | -1      |
| AT3G59900 | 1  | 1  | 1  | 0  | 1 | 0  | 0  | 0         | 0                | 1       |
| AT3G60120 | 0  | 0  | 0  | -1 | 0 | 0  | 0  | -1        | -1               | -1      |
| AT3G60140 | 0  | 1  | 0  | 1  | 0 | 0  | 0  | 0         | 0                | 1       |
| AT3G60290 | 0  | 0  | 0  | -1 | 0 | 0  | 0  | -1        | 0                | -1      |
| AT3G60330 | 0  | 0  | 0  | -1 | 0 | 0  | 0  | 0         | 0                | -1      |
| AT3G60370 | 0  | 0  | 0  | 0  | 0 | 0  | -1 | 0         | 0                | -1      |
| AT3G60520 | 0  | 1  | 0  | 1  | 0 | 0  | 0  | 0         | 0                | 1       |
| AT3G60530 | 0  | 0  | 0  | 0  | 0 | 0  | -1 | 0         | 0                | -1      |
| AT3G60540 | 0  | 0  | 0  | 0  | 0 | 0  | -1 | 0         | 0                | -1      |
| AT3G60900 | 0  | -1 | 0  | 0  | 0 | 0  | 0  | 0         | 0                | -1      |
| AT3G61060 | 0  | 1  | 0  | 1  | 0 | 0  | 0  | 0         | 0                | 1       |
| AT3G61198 | 0  | 0  | 0  | -1 | 0 | 0  | 0  | -1        | 0                | -1      |
| AT3G61210 | 0  | 0  | 0  | -1 | 0 | 0  | 0  | 0         | 0                | -1      |
| AT3G61220 | 0  | 0  | 0  | 0  | 0 | 0  | 1  | 1         | 0                | 1       |
| AT3G61250 | 0  | -1 | 0  | 0  | 0 | 0  | 0  | 0         | 0                | -1      |
| AT3G61310 | 0  | 0  | 0  | 0  | 0 | 0  | -1 | 0         | 0                | -1      |
| AT3G61460 | 1  | 0  | 0  | 0  | 1 | 0  | 0  | 0         | 0                | 1       |
| AT3G61470 | 0  | -1 | 0  | 0  | 0 | -1 | -1 | 0         | 0                | -1      |
| AT3G61550 | 0  | 0  | 0  | 0  | 0 | 0  | -1 | 0         | 0                | -1      |
| AT3G61680 | 0  | 1  | 0  | 1  | 0 | 0  | 0  | 0         | 0                | 1       |
| AT3G61830 | 0  | 1  | 0  | 0  | 0 | 1  | 1  | 0         | 0                | 1       |
| AT3G61870 | 0  | 0  | 0  | 0  | 0 | 0  | -1 | 0         | 0                | -1      |
| AT3G61890 | 0  | 0  | 0  | 0  | 0 | 0  | -1 | 0         | 0                | -1      |
| AT3G61920 | 0  | -1 | 0  | 0  | 0 | 0  | 0  | 0         | 0                | -1      |
| AT3G61950 | 0  | -1 | 0  | -1 | 0 | 0  | 0  | 0         | 0                | -1      |
| AT3G61990 | 0  | -1 | 0  | 0  | 0 | 0  | 0  | 0         | 0                | -1      |
| AT3G62020 | 0  | 0  | 0  | 1  | 0 | 0  | 0  | 1         | 0                | 1       |
| AT3G62030 | 0  | 0  | 0  | 0  | 0 | -1 | 0  | 0         | 0                | -1      |
| AT3G62090 | 0  | 1  | 0  | 1  | 0 | 1  | 1  | 0         | 1                | 1       |
| AT3G62150 | 0  | 0  | 0  | -1 | 0 | 0  | 0  | 0         | 0                | -1      |
| AT3G62410 | 0  | 0  | 0  | 0  | 0 | 0  | -1 | 0         | 0                | -1      |
| AT3G62530 | 0  | -1 | 0  | 0  | 0 | 0  | 0  | 0         | 0                | -1      |
| AT3G62550 | 0  | 0  | 0  | -1 | 0 | 0  | -1 | 0         | 0                | -1      |
| AT3G62750 | 0  | 0  | 0  | 0  | 0 | 0  | -1 | 0         | 0                | -1      |
| AT3G62760 | 0  | -1 | 0  | 0  | 0 | 0  | 0  | 0         | 0                | -1      |
| AT3G62820 | 0  | 0  | 0  | 0  | 0 | 0  | -1 | 0         | 0                | -1      |
| AT3G62930 | 0  | 0  | 0  | -1 | 0 | 0  | 0  | 0         | 0                | -1      |
| AT3G63140 | 0  | -1 | -1 | 0  | 0 | 0  | -1 | 0         | 0                | -1      |
| AT3G63160 | 0  | 0  | 0  | -1 | 0 | 0  | 0  | 0         | 0                | -1      |
| AT3G63200 | 0  | 0  | 0  | 0  | 0 | 0  | -1 | 0         | 0                | -1      |
| AT3G63350 | 0  | 1  | 0  | 1  | 0 | 0  | 1  | 0         | 0                | 1       |
| AT3G63470 | 0  | 1  | 0  | 1  | 0 | 0  | 1  | 0         | 0                | 1       |
| AT3G63490 | 0  | 0  | 0  | 0  | 0 | -1 | 0  | 0         | 0                | -1      |
| AT4G00165 | 0  | -1 | 0  | 0  | 0 | 0  | 0  | 0         | 0                | -1      |
| AT4G00360 | 1  | 0  | 0  | 1  | 0 | 0  | 0  | 0         | 0                | 1       |
| AT4G00390 | 0  | -1 | 0  | 0  | 0 | 0  | 0  | 0         | 0                | -1      |
| AT4G00480 | 0  | -1 | 0  | 0  | 0 | 0  | -1 | 0         | 0                | -1      |
| AT4G00750 | 0  | 0  | 0  | 0  | 0 | 0  | -1 | 0         | 0                | -1      |
| AT4G00810 | 0  | -1 | 0  | 0  | 0 | 0  | 0  | 0         | 0                | -1      |
| AT4G00820 | 1  | 0  | 0  | 0  | 1 | 0  | 0  | 0         | 0                | 1       |
| AT4G00880 | 0  | -1 | 0  | 0  | 0 | 0  | 0  | 0         | 0                | -1      |
| AT4G00910 | 0  | 1  | 0  | 1  | 0 | 0  | 0  | 0         | 0                | 1       |
| AT4G00950 | 0  | -1 | 0  | -1 | 0 | 0  | -1 | 0         | 0                | -1      |
| AT4G00970 | 0  | 0  | 0  | 0  | 0 | 0  | 0  | 0         | -1               | -1      |
| AT4G01050 | 0  | -1 | -1 | 0  | 0 | 0  | -1 | -1        | 0                | -1      |



Appendix Table S2

| Name      | 1  | 2  | 3  | 4  | 5 | 6  | 7  | pif45_Col | pif45bes1D_bes1D | ALL_PIF |
|-----------|----|----|----|----|---|----|----|-----------|------------------|---------|
| AT4G08780 | 0  | 0  | 0  | -1 | 0 | 0  | 0  | 0         | 0                | -1      |
| AT4G09010 | -1 | -1 | -1 | 0  | 0 | -1 | -1 | 0         | 0                | -1      |
| AT4G09320 | 0  | -1 | 0  | 0  | 0 | 0  | 0  | 0         | 0                | -1      |
| AT4G09350 | 0  | 0  | 0  | 0  | 0 | 0  | -1 | 0         | 0                | -1      |
| AT4G09380 | 0  | 0  | 0  | -1 | 0 | 0  | 0  | 0         | 0                | -1      |
| AT4G09600 | 0  | 1  | 0  | 0  | 0 | 0  | 1  | 0         | 0                | 1       |
| AT4G09610 | 0  | 1  | 0  | 0  | 0 | 0  | 1  | 0         | 0                | 1       |
| AT4G09620 | 0  | 0  | 0  | 0  | 0 | 0  | -1 | 0         | 0                | -1      |
| AT4G09650 | 0  | -1 | -1 | 0  | 0 | -1 | -1 | 0         | 0                | -1      |
| AT4G09900 | 0  | -1 | 0  | 0  | 0 | 0  | 0  | 0         | 0                | -1      |
| AT4G09990 | 0  | -1 | 0  | 0  | 0 | 0  | 0  | 0         | 0                | -1      |
| AT4G10020 | 0  | 1  | 1  | 1  | 0 | 1  | 1  | 0         | 0                | 1       |
| AT4G10060 | 0  | 0  | 0  | 0  | 0 | 0  | -1 | 0         | 0                | -1      |
| AT4G10150 | 1  | 1  | 1  | 1  | 0 | 0  | 0  | 0         | 0                | 1       |
| AT4G10160 | 1  | 1  | 1  | 1  | 0 | 0  | 0  | 0         | 0                | 1       |
| AT4G10240 | 0  | 1  | 0  | 1  | 0 | 1  | 1  | 0         | 1                | 1       |
| AT4G10250 | 0  | 1  | 0  | 1  | 0 | 0  | 1  | 0         | 0                | 1       |
| AT4G10270 | 0  | 0  | 0  | 0  | 0 | 0  | -1 | 0         | 0                | -1      |
| AT4G10280 | 0  | 0  | 0  | 0  | 0 | 0  | 0  | -1        | 0                | -1      |
| AT4G10300 | 0  | 0  | 0  | 0  | 0 | 0  | -1 | 0         | 0                | -1      |
| AT4G10310 | 1  | 0  | 0  | 1  | 0 | 0  | 0  | 0         | 0                | 1       |
| AT4G10340 | 0  | -1 | 0  | 0  | 0 | -1 | -1 | 0         | 0                | -1      |
| AT4G10380 | 0  | 0  | 0  | 0  | 0 | 0  | -1 | 0         | 0                | -1      |
| AT4G10450 | 0  | -1 | 0  | 0  | 0 | 0  | 0  | 0         | 0                | -1      |
| AT4G10500 | 0  | 0  | 0  | 0  | 0 | 0  | 0  | 0         | -1               | -1      |
| AT4G10530 | 0  | 0  | 0  | -1 | 0 | 0  | 0  | 0         | 0                | -1      |
| AT4G10620 | 0  | -1 | 0  | 0  | 0 | 0  | 0  | 0         | 0                | -1      |
| AT4G10640 | 0  | 0  | 0  | -1 | 0 | 0  | 0  | 0         | 0                | -1      |
| AT4G11000 | 0  | 1  | 0  | 1  | 0 | 0  | 0  | 0         | 0                | 1       |
| AT4G11020 | 0  | 0  | 0  | 1  | 0 | 0  | 1  | 0         | 0                | 1       |
| AT4G11050 | 0  | 1  | 0  | 1  | 0 | 1  | 1  | 0         | 0                | 1       |
| AT4G11100 | 0  | 0  | 0  | 0  | 0 | 0  | -1 | 0         | 0                | -1      |
| AT4G11140 | 0  | -1 | 0  | -1 | 0 | 0  | 0  | 0         | 0                | -1      |
| AT4G11190 | 1  | 0  | 0  | 1  | 1 | 0  | 1  | 1         | 1                | 1       |
| AT4G11211 | 0  | 0  | 0  | -1 | 0 | 0  | 0  | 0         | 0                | -1      |
| AT4G11290 | 0  | 0  | 0  | 1  | 0 | 1  | 1  | 0         | 0                | 1       |
| AT4G11320 | 0  | -1 | 0  | -1 | 0 | 0  | -1 | 0         | 0                | -1      |
| AT4G11450 | 0  | 0  | 0  | -1 | 0 | 0  | 0  | 0         | 0                | -1      |
| AT4G11460 | -1 | -1 | 0  | -1 | 0 | -1 | -1 | 0         | 0                | -1      |
| AT4G11610 | 0  | 1  | 1  | 1  | 0 | 1  | 1  | 1         | 0                | 1       |
| AT4G11650 | 0  | 1  | 0  | 0  | 0 | 0  | 1  | 0         | 0                | 1       |
| AT4G11890 | 0  | 0  | 0  | -1 | 0 | 0  | 0  | 0         | 0                | -1      |
| AT4G11900 | 0  | 0  | 0  | -1 | 0 | 0  | 0  | 0         | 0                | -1      |
| AT4G12310 | 0  | -1 | 0  | -1 | 0 | 0  | 0  | 0         | 0                | -1      |
| AT4G12320 | 0  | 0  | 0  | -1 | 0 | 0  | -1 | 0         | 0                | -1      |
| AT4G12390 | 0  | 0  | 0  | 0  | 0 | 0  | -1 | 0         | 0                | -1      |
| AT4G12410 | 0  | 0  | 0  | 0  | 0 | 1  | 1  | 0         | 0                | 1       |
| AT4G12430 | 0  | 0  | 0  | 0  | 0 | 0  | -1 | 0         | 0                | -1      |
| AT4G12510 | 0  | 1  | 1  | 1  | 0 | 0  | 1  | 0         | 0                | 1       |
| AT4G12545 | 0  | 0  | 0  | -1 | 0 | 0  | 0  | 0         | 0                | -1      |
| AT4G12550 | 0  | 0  | -1 | -1 | 0 | 0  | 0  | 0         | 0                | -1      |
| AT4G12600 | 0  | -1 | 0  | 0  | 0 | 0  | 0  | 0         | 0                | -1      |
| AT4G12730 | 1  | 0  | 0  | 1  | 0 | 0  | 1  | 0         | 1                | 1       |
| AT4G12735 | 0  | 0  | 0  | -1 | 0 | 0  | 0  | 0         | 0                | -1      |
| AT4G12800 | 0  | -1 | 0  | 0  | 0 | -1 | -1 | 0         | 0                | -1      |
| AT4G12830 | 0  | 0  | 0  | 0  | 0 | 0  | -1 | 0         | 0                | -1      |
| AT4G12870 | 0  | -1 | 0  | 0  | 0 | 0  | 0  | 0         | 0                | -1      |
| AT4G12880 | 1  | 0  | 0  | 1  | 0 | 0  | 0  | 0         | 0                | 1       |
| AT4G12900 | 0  | -1 | 0  | 0  | 0 | 0  | 0  | 0         | 0                | -1      |
| AT4G12910 | 0  | 0  | 0  | 0  | 0 | 0  | -1 | 0         | 0                | -1      |
| AT4G12970 | 0  | 0  | 0  | 0  | 0 | 0  | -1 | 0         | 0                | -1      |

Appendix Table S2

| Name      | 1  | 2  | 3  | 4  | 5  | 6 | 7  | pif45_Col | pif45bes1D_bes1D | ALL_PIF |
|-----------|----|----|----|----|----|---|----|-----------|------------------|---------|
| AT4G12980 | 0  | 0  | 0  | 0  | 0  | 0 | -1 | 0         | 0                | -1      |
| AT4G13100 | 0  | 0  | 0  | 0  | 0  | 0 | -1 | 0         | 0                | -1      |
| AT4G13170 | 0  | -1 | 0  | 0  | 0  | 0 | 0  | 0         | 0                | -1      |
| AT4G13210 | 0  | 1  | 0  | 1  | 0  | 1 | 1  | 0         | 0                | 1       |
| AT4G13220 | -1 | 0  | 0  | 0  | 0  | 0 | -1 | 0         | 0                | -1      |
| AT4G13320 | 0  | 0  | 0  | -1 | 0  | 0 | 0  | 0         | 0                | -1      |
| AT4G13493 | 0  | 0  | 0  | -1 | 0  | 0 | 0  | -1        | 0                | -1      |
| AT4G13494 | 0  | 0  | 0  | -1 | 0  | 0 | 0  | -1        | -1               | -1      |
| AT4G13495 | 0  | -1 | 0  | -1 | 0  | 0 | 0  | -1        | -1               | -1      |
| AT4G13500 | 0  | 0  | 0  | 0  | 0  | 0 | -1 | 0         | 0                | -1      |
| AT4G13540 | 0  | 1  | 0  | 1  | 0  | 0 | 0  | 0         | 0                | 1       |
| AT4G13564 | 0  | 0  | 0  | -1 | 0  | 0 | 0  | 0         | 0                | -1      |
| AT4G13570 | 0  | 0  | 0  | -1 | 0  | 0 | 0  | 0         | 0                | -1      |
| AT4G13575 | 0  | 0  | 0  | -1 | 0  | 0 | 0  | -1        | 0                | -1      |
| AT4G13580 | 0  | 0  | 0  | 1  | 0  | 0 | 1  | 0         | 0                | 1       |
| AT4G13690 | 0  | -1 | 0  | 0  | 0  | 0 | 0  | 0         | 0                | -1      |
| AT4G13790 | 0  | 1  | 1  | 1  | 1  | 1 | 1  | 0         | 0                | 1       |
| AT4G13840 | 0  | 0  | 0  | -1 | 0  | 0 | 0  | 0         | 0                | -1      |
| AT4G13880 | 0  | 0  | 0  | -1 | 0  | 0 | 0  | 0         | 0                | -1      |
| AT4G14090 | 0  | 0  | 0  | 0  | -1 | 0 | 0  | 0         | 0                | -1      |
| AT4G14130 | 0  | 1  | 1  | 1  | 1  | 0 | 1  | 1         | 1                | 1       |
| AT4G14320 | 0  | -1 | 0  | 0  | 0  | 0 | 0  | 0         | 0                | -1      |
| AT4G14380 | 0  | 1  | 0  | 1  | 0  | 0 | 0  | 0         | 0                | 1       |
| AT4G14465 | 0  | 1  | 0  | 1  | 0  | 1 | 1  | 0         | 0                | 1       |
| AT4G14480 | 0  | -1 | 0  | 0  | 0  | 0 | 0  | 0         | 0                | -1      |
| AT4G14540 | 0  | 0  | 0  | 0  | 0  | 0 | -1 | 0         | 0                | -1      |
| AT4G14630 | 0  | 0  | 0  | -1 | 0  | 0 | 0  | 0         | 0                | -1      |
| AT4G14660 | 0  | 0  | 0  | -1 | 0  | 0 | 0  | 0         | 0                | -1      |
| AT4G14723 | 0  | -1 | 0  | 0  | 0  | 0 | 0  | 0         | 0                | -1      |
| AT4G14750 | 1  | 0  | 0  | 1  | 0  | 0 | 0  | 0         | 0                | 1       |
| AT4G14790 | 0  | -1 | 0  | 0  | 0  | 0 | 0  | 0         | 0                | -1      |
| AT4G15000 | 0  | -1 | 0  | 0  | 0  | 0 | 0  | 0         | 0                | -1      |
| AT4G15140 | 0  | -1 | 0  | 0  | 0  | 0 | 0  | 0         | 0                | -1      |
| AT4G15250 | -1 | 0  | 0  | 0  | 0  | 0 | 0  | 0         | 0                | -1      |
| AT4G15258 | 0  | 0  | 0  | -1 | 0  | 0 | 0  | 0         | 0                | -1      |
| AT4G15360 | 0  | -1 | 0  | 0  | 0  | 0 | 0  | 0         | 0                | -1      |
| AT4G15393 | 0  | 0  | 0  | -1 | 0  | 0 | 0  | 0         | 0                | -1      |
| AT4G15490 | 0  | 0  | 0  | -1 | 0  | 0 | 0  | 0         | 0                | -1      |
| AT4G15500 | 0  | -1 | 0  | -1 | 0  | 0 | 0  | 0         | 0                | -1      |
| AT4G15510 | 0  | -1 | 0  | 0  | 0  | 0 | -1 | 0         | 0                | -1      |
| AT4G15560 | 0  | 0  | 0  | 0  | 0  | 0 | -1 | 0         | 0                | -1      |
| AT4G15610 | 0  | 1  | 0  | 1  | 0  | 0 | 0  | 0         | 0                | 1       |
| AT4G15620 | 0  | -1 | 0  | -1 | 0  | 0 | -1 | 0         | 0                | -1      |
| AT4G15660 | 0  | -1 | 0  | 0  | 0  | 0 | 0  | 0         | 0                | -1      |
| AT4G15670 | 0  | 0  | 0  | 1  | 0  | 0 | 0  | 1         | 0                | 1       |
| AT4G15690 | 0  | -1 | 0  | 0  | 0  | 0 | 0  | 0         | 0                | -1      |
| AT4G15770 | 0  | -1 | 0  | 0  | 0  | 0 | 0  | 0         | 0                | -1      |
| AT4G15910 | 0  | 0  | -1 | -1 | 0  | 0 | 0  | 0         | 0                | -1      |
| AT4G15975 | 0  | 0  | 0  | -1 | 0  | 0 | 0  | 0         | 0                | -1      |
| AT4G16015 | 0  | 0  | 0  | -1 | 0  | 0 | 0  | 0         | 0                | -1      |
| AT4G16140 | 0  | 0  | 0  | -1 | 0  | 0 | -1 | 0         | 0                | -1      |
| AT4G16270 | 0  | 0  | 0  | -1 | 0  | 0 | 0  | 0         | 0                | -1      |
| AT4G16370 | 0  | 0  | 0  | -1 | 0  | 0 | 0  | 0         | 0                | -1      |
| AT4G16410 | 0  | -1 | 0  | -1 | 0  | 0 | -1 | 0         | 0                | -1      |
| AT4G16442 | 0  | 1  | 0  | 1  | 0  | 1 | 1  | 0         | 0                | 1       |
| AT4G16670 | 0  | 1  | 1  | 0  | 1  | 1 | 1  | 0         | 1                | 1       |
| AT4G16690 | 0  | 0  | 0  | 0  | 0  | 0 | -1 | 0         | 0                | -1      |
| AT4G16750 | 1  | 0  | 0  | 1  | 0  | 0 | 0  | 0         | 0                | 1       |
| AT4G16780 | 1  | 1  | 1  | 1  | 1  | 1 | 1  | 0         | 0                | 1       |
| AT4G16860 | 0  | 0  | 0  | -1 | 0  | 0 | 0  | 0         | -1               | -1      |
| AT4G16920 | 0  | 0  | 0  | -1 | 0  | 0 | 0  | 0         | 0                | -1      |

Appendix Table S2

| Name      | 1  | 2  | 3  | 4  | 5  | 6  | 7  | pif45_Col | pif45bes1D_bes1D | ALL_PIF |
|-----------|----|----|----|----|----|----|----|-----------|------------------|---------|
| AT4G16950 | 0  | 0  | 0  | -1 | 0  | 0  | -1 | 0         | 0                | -1      |
| AT4G16980 | 0  | -1 | 0  | 0  | 0  | 0  | 0  | 0         | 0                | -1      |
| AT4G16990 | 0  | 0  | 0  | -1 | 0  | 0  | -1 | 0         | 0                | -1      |
| AT4G17090 | 0  | 0  | 0  | 0  | -1 | 0  | 0  | 0         | 0                | -1      |
| AT4G17245 | 0  | 0  | 0  | 0  | 0  | 0  | -1 | 0         | 0                | -1      |
| AT4G17280 | 0  | 0  | 0  | 1  | 0  | 0  | 1  | 0         | 0                | 1       |
| AT4G17420 | 1  | 0  | 0  | 1  | 0  | 0  | 0  | 0         | 0                | 1       |
| AT4G17470 | 0  | -1 | 0  | 0  | 0  | -1 | -1 | 0         | 0                | -1      |
| AT4G17480 | 0  | -1 | 0  | 0  | 0  | 0  | 0  | 0         | 0                | -1      |
| AT4G17490 | 0  | 0  | 0  | 0  | 0  | 0  | 0  | -1        | 0                | -1      |
| AT4G17670 | 0  | 0  | 0  | 1  | 0  | 0  | 1  | 0         | 0                | 1       |
| AT4G17695 | 1  | 0  | 0  | 0  | 1  | 0  | 0  | 0         | 0                | 1       |
| AT4G17810 | -1 | 0  | 0  | 0  | 0  | 0  | -1 | 0         | 0                | -1      |
| AT4G18010 | 0  | 0  | 0  | -1 | 0  | 0  | 0  | 0         | 0                | -1      |
| AT4G18100 | 0  | -1 | 0  | 0  | 0  | 0  | 0  | 0         | 0                | -1      |
| AT4G18140 | -1 | 0  | 0  | 0  | 0  | 0  | 0  | 0         | 0                | -1      |
| AT4G18170 | 0  | -1 | 0  | -1 | 0  | 0  | 0  | 0         | 0                | -1      |
| AT4G18250 | 0  | 0  | 0  | -1 | 0  | 0  | 0  | 0         | 0                | -1      |
| AT4G18340 | 0  | 0  | 0  | 0  | 0  | 0  | -1 | 0         | 0                | -1      |
| AT4G18370 | 0  | 0  | 0  | 0  | 0  | 0  | -1 | 0         | 0                | -1      |
| AT4G18440 | 0  | -1 | 0  | 0  | 0  | 0  | 0  | 0         | 0                | -1      |
| AT4G18480 | 0  | -1 | 0  | 0  | 0  | -1 | -1 | 0         | 0                | -1      |
| AT4G18501 | 0  | -1 | 0  | 0  | 0  | 0  | 0  | 0         | 0                | -1      |
| AT4G18570 | 0  | 0  | 0  | -1 | 0  | 0  | 0  | 0         | 0                | -1      |
| AT4G18650 | 0  | 1  | 0  | 0  | 0  | 0  | 1  | 0         | 0                | 1       |
| AT4G18690 | 0  | 1  | 0  | 1  | 0  | 0  | 0  | 0         | 0                | 1       |
| AT4G18740 | 0  | -1 | 0  | -1 | 0  | 0  | -1 | 0         | -1               | -1      |
| AT4G18940 | 0  | 0  | 0  | -1 | 0  | 0  | 0  | 0         | 0                | -1      |
| AT4G19030 | 0  | -1 | 0  | 0  | 0  | 0  | 0  | 0         | 0                | -1      |
| AT4G19080 | 0  | 0  | 0  | -1 | 0  | 0  | 0  | 0         | 0                | -1      |
| AT4G19120 | 0  | 1  | 0  | 1  | 0  | 0  | 1  | 0         | 0                | 1       |
| AT4G19130 | 0  | -1 | 0  | 0  | 0  | 0  | 0  | 0         | 0                | -1      |
| AT4G19170 | 0  | -1 | 0  | 0  | 0  | 0  | 0  | 0         | 0                | -1      |
| AT4G19380 | 0  | 0  | 0  | -1 | 0  | 0  | 0  | 0         | 0                | -1      |
| AT4G19420 | 0  | 0  | 0  | 0  | 0  | 0  | -1 | 0         | 0                | -1      |
| AT4G19520 | 0  | -1 | 0  | 0  | 0  | 0  | 0  | 0         | 0                | -1      |
| AT4G19530 | 0  | -1 | 0  | -1 | 0  | 0  | -1 | 0         | 0                | -1      |
| AT4G19645 | 0  | -1 | 0  | 0  | 0  | 0  | 0  | 0         | 0                | -1      |
| AT4G19690 | 0  | 0  | 0  | -1 | 0  | 0  | 0  | 0         | 0                | -1      |
| AT4G19820 | 0  | 0  | 0  | -1 | 0  | 0  | 0  | 0         | 0                | -1      |
| AT4G19830 | 0  | 0  | 0  | 0  | 0  | 0  | -1 | 0         | 0                | -1      |
| AT4G19940 | -1 | 0  | 0  | 0  | 0  | 0  | 0  | 0         | 0                | -1      |
| AT4G19970 | 0  | -1 | 0  | 0  | 0  | 0  | 0  | 0         | 0                | -1      |
| AT4G20000 | 0  | 0  | 0  | -1 | 0  | 0  | 0  | -1        | 0                | -1      |
| AT4G20070 | 0  | 0  | 0  | 0  | 0  | 0  | -1 | 0         | 0                | -1      |
| AT4G20210 | 0  | -1 | 0  | -1 | 0  | 0  | 0  | 0         | 0                | -1      |
| AT4G20230 | 0  | -1 | 0  | 0  | 0  | 0  | 0  | 0         | 0                | -1      |
| AT4G20260 | 0  | 1  | 0  | 1  | 0  | 0  | 0  | 0         | 0                | 1       |
| AT4G20390 | 0  | -1 | 0  | 0  | 0  | 0  | 0  | 0         | 0                | -1      |
| AT4G20430 | 0  | -1 | 0  | 0  | 0  | 0  | 0  | 0         | 0                | -1      |
| AT4G20510 | 0  | 0  | 0  | -1 | 0  | 0  | 0  | 0         | 0                | -1      |
| AT4G21180 | 0  | 0  | 0  | 0  | 0  | 0  | -1 | 0         | 0                | -1      |
| AT4G21210 | 0  | 0  | 0  | 0  | 0  | 0  | -1 | 0         | 0                | -1      |
| AT4G21280 | 0  | -1 | -1 | 0  | 0  | 0  | -1 | 0         | 0                | -1      |
| AT4G21380 | 0  | 0  | 0  | -1 | 0  | 0  | 0  | 0         | 0                | -1      |
| AT4G21470 | -1 | 0  | 0  | 0  | 0  | 0  | 0  | 0         | 0                | -1      |
| AT4G21650 | 0  | 0  | 0  | -1 | 0  | 0  | 0  | 0         | 0                | -1      |
| AT4G21830 | 0  | 1  | 0  | 1  | 0  | 0  | 1  | 0         | 0                | 1       |
| AT4G21850 | 0  | 0  | 1  | 1  | 0  | 0  | 1  | 0         | 0                | 1       |
| AT4G21870 | 0  | 0  | 0  | -1 | 0  | 0  | -1 | 0         | 0                | -1      |
| AT4G21903 | 0  | 0  | 0  | -1 | 0  | 0  | 0  | 0         | 0                | -1      |

Appendix Table S2

| Name      | 1 | 2  | 3  | 4  | 5  | 6  | 7  | pif45_Col | pif45bes1D_bes1D | ALL_PIF |
|-----------|---|----|----|----|----|----|----|-----------|------------------|---------|
| AT4G21910 | 0 | 0  | 0  | -1 | 0  | 0  | 0  | 0         | 0                | -1      |
| AT4G21926 | 0 | -1 | 0  | 0  | 0  | 0  | 0  | 0         | 0                | -1      |
| AT4G22130 | 1 | 0  | 0  | 1  | 0  | 0  | 0  | 0         | 0                | 1       |
| AT4G22200 | 0 | 0  | 0  | 0  | 0  | 0  | -1 | 0         | 0                | -1      |
| AT4G22212 | 0 | -1 | 0  | -1 | 0  | 0  | 0  | 0         | 0                | -1      |
| AT4G22214 | 0 | -1 | 0  | 0  | 0  | 0  | 0  | 0         | 0                | -1      |
| AT4G22380 | 0 | -1 | 0  | 0  | 0  | 0  | 0  | 0         | 0                | -1      |
| AT4G22460 | 0 | 0  | 0  | 1  | 0  | 1  | 1  | 0         | 0                | 1       |
| AT4G22485 | 0 | 0  | 0  | -1 | 0  | 0  | 0  | 0         | 0                | -1      |
| AT4G22490 | 0 | 0  | 0  | 1  | 0  | 0  | 1  | 0         | 0                | 1       |
| AT4G22505 | 0 | 0  | 0  | -1 | 0  | 0  | 0  | 0         | 0                | -1      |
| AT4G22513 | 0 | 0  | 0  | -1 | 0  | 0  | 0  | 0         | 0                | -1      |
| AT4G22570 | 0 | -1 | 0  | 0  | 0  | 0  | -1 | 0         | 0                | -1      |
| AT4G22690 | 0 | -1 | 0  | 0  | 0  | 0  | 0  | -1        | 0                | -1      |
| AT4G22710 | 0 | 0  | 0  | 0  | 0  | 0  | -1 | -1        | 0                | -1      |
| AT4G22730 | 0 | -1 | 0  | 0  | 0  | 0  | -1 | 0         | 0                | -1      |
| AT4G22753 | 0 | -1 | 0  | -1 | 0  | 0  | -1 | 0         | 0                | -1      |
| AT4G22780 | 0 | 0  | 0  | 1  | 1  | 0  | 0  | 0         | 0                | 1       |
| AT4G22890 | 0 | 0  | 0  | 0  | 0  | 0  | -1 | 0         | 0                | -1      |
| AT4G22960 | 0 | 0  | 0  | -1 | 0  | 0  | 0  | 0         | 0                | -1      |
| AT4G23130 | 0 | 0  | 0  | -1 | 0  | 0  | 0  | 0         | 0                | -1      |
| AT4G23210 | 0 | 0  | 0  | -1 | 0  | 0  | 0  | 0         | 0                | -1      |
| AT4G23280 | 0 | 0  | 0  | 0  | 0  | 0  | 0  | -1        | -1               | -1      |
| AT4G23290 | 0 | -1 | 0  | -1 | -1 | 0  | 0  | 0         | 0                | -1      |
| AT4G23300 | 0 | -1 | 0  | -1 | 0  | 0  | 0  | 0         | 0                | -1      |
| AT4G23400 | 0 | 1  | 0  | 1  | 0  | 0  | 0  | 0         | 0                | 1       |
| AT4G23560 | 0 | 0  | 0  | 1  | 0  | 0  | 0  | 0         | 1                | 1       |
| AT4G23600 | 0 | 0  | 0  | 0  | -1 | 0  | 0  | 0         | 0                | -1      |
| AT4G23670 | 0 | 0  | 0  | 0  | 0  | -1 | 0  | 0         | 0                | -1      |
| AT4G23680 | 0 | -1 | 0  | 0  | 0  | -1 | -1 | 0         | 0                | -1      |
| AT4G23690 | 0 | 0  | 0  | 1  | 0  | 0  | 1  | 0         | 0                | 1       |
| AT4G23700 | 0 | 1  | 0  | 1  | 0  | 0  | 1  | 0         | 0                | 1       |
| AT4G23800 | 0 | -1 | 0  | 0  | 0  | 0  | 0  | 0         | 0                | -1      |
| AT4G23810 | 0 | 0  | 0  | -1 | 0  | 0  | 0  | 0         | 0                | -1      |
| AT4G23870 | 1 | 1  | 0  | 0  | 0  | 0  | 0  | 0         | 0                | 1       |
| AT4G23885 | 0 | 0  | 0  | 1  | 0  | 0  | 1  | 0         | 0                | 1       |
| AT4G23890 | 0 | 0  | 0  | 0  | 0  | 0  | -1 | 0         | 0                | -1      |
| AT4G24110 | 0 | -1 | 0  | 0  | 0  | 0  | 0  | 0         | 0                | -1      |
| AT4G24120 | 0 | 0  | 0  | 0  | 0  | 0  | -1 | 0         | 0                | -1      |
| AT4G24140 | 0 | -1 | 0  | 0  | 0  | 0  | 0  | 0         | 0                | -1      |
| AT4G24150 | 0 | 0  | 0  | 1  | 0  | 0  | 1  | 0         | 0                | 1       |
| AT4G24340 | 0 | 0  | 0  | -1 | 0  | 0  | -1 | 0         | 0                | -1      |
| AT4G24350 | 0 | 0  | 0  | 0  | 0  | 0  | -1 | 0         | 0                | -1      |
| AT4G24450 | 0 | 0  | 0  | -1 | 0  | 0  | 0  | 0         | 0                | -1      |
| AT4G24600 | 0 | 0  | 0  | -1 | 0  | 0  | 0  | 0         | 0                | -1      |
| AT4G24660 | 0 | -1 | 0  | 0  | 0  | 0  | 0  | 0         | 0                | -1      |
| AT4G24700 | 0 | -1 | 0  | 0  | 0  | 0  | -1 | 0         | 0                | -1      |
| AT4G24780 | 0 | 0  | -1 | -1 | 0  | 0  | -1 | 0         | 0                | -1      |
| AT4G24810 | 0 | 0  | 0  | 0  | 0  | 0  | -1 | 0         | 0                | -1      |
| AT4G24930 | 0 | 0  | 0  | 0  | 0  | 0  | -1 | 0         | 0                | -1      |
| AT4G24972 | 0 | -1 | 0  | -1 | 0  | 0  | 0  | 0         | 0                | -1      |
| AT4G25010 | 0 | -1 | 0  | 0  | 0  | 0  | 0  | 0         | 0                | -1      |
| AT4G25050 | 0 | -1 | 0  | -1 | 0  | -1 | -1 | 0         | 0                | -1      |
| AT4G25070 | 0 | 0  | 0  | -1 | 0  | 0  | 0  | 0         | 0                | -1      |
| AT4G25080 | 0 | 0  | 0  | 0  | 0  | 0  | -1 | 0         | 0                | -1      |
| AT4G25100 | 0 | 0  | -1 | 0  | 0  | 0  | 0  | 0         | 0                | -1      |
| AT4G25260 | 1 | 1  | 1  | 1  | 1  | 1  | 1  | 1         | 0                | 1       |
| AT4G25310 | 0 | 0  | 0  | -1 | 0  | 0  | 0  | 0         | 0                | -1      |
| AT4G25315 | 0 | 0  | 0  | -1 | 0  | 0  | 0  | 0         | 0                | -1      |
| AT4G25390 | 0 | 1  | 0  | 1  | 0  | 0  | 1  | 0         | 0                | 1       |
| AT4G25420 | 0 | 0  | 0  | 1  | 1  | 0  | 0  | 0         | 0                | 1       |

Appendix Table S2

| Name      | 1 | 2  | 3  | 4  | 5 | 6  | 7  | pif45_Col | pif45bes1D_bes1D | ALL_PIF |
|-----------|---|----|----|----|---|----|----|-----------|------------------|---------|
| AT4G25470 | 0 | 0  | 0  | 0  | 0 | 0  | 0  | -1        | 0                | -1      |
| AT4G25580 | 0 | 1  | 1  | 0  | 0 | 0  | 0  | 0         | 0                | 1       |
| AT4G25630 | 0 | -1 | 0  | 0  | 0 | 0  | 0  | 0         | 0                | -1      |
| AT4G25707 | 0 | 0  | 0  | -1 | 0 | 0  | 0  | 0         | 0                | -1      |
| AT4G25790 | 0 | -1 | 0  | 0  | 0 | 0  | 0  | 0         | 0                | -1      |
| AT4G25810 | 0 | 1  | 0  | 1  | 0 | 0  | 0  | 0         | 0                | 1       |
| AT4G25820 | 0 | 0  | 0  | 1  | 0 | 0  | 1  | 0         | 0                | 1       |
| AT4G25890 | 0 | -1 | 0  | 0  | 0 | 0  | 0  | 0         | 0                | -1      |
| AT4G25910 | 0 | 0  | 0  | 0  | 0 | 0  | -1 | 0         | 0                | -1      |
| AT4G26150 | 0 | -1 | 0  | -1 | 0 | 0  | 0  | 0         | 0                | -1      |
| AT4G26220 | 0 | -1 | 0  | 0  | 0 | 0  | 0  | 0         | 0                | -1      |
| AT4G26320 | 0 | 0  | 1  | 1  | 0 | 0  | 1  | 1         | 0                | 1       |
| AT4G26390 | 0 | 0  | 0  | 1  | 0 | 1  | 0  | 0         | 0                | 1       |
| AT4G26520 | 0 | 0  | 0  | -1 | 0 | 0  | -1 | 0         | 0                | -1      |
| AT4G26530 | 0 | 0  | 0  | 0  | 0 | 0  | -1 | 0         | 0                | -1      |
| AT4G26555 | 0 | 0  | 0  | 0  | 0 | 0  | -1 | 0         | 0                | -1      |
| AT4G26600 | 0 | -1 | 0  | 0  | 0 | 0  | 0  | 0         | 0                | -1      |
| AT4G26780 | 0 | -1 | 0  | 0  | 0 | 0  | 0  | 0         | 0                | -1      |
| AT4G26790 | 0 | -1 | 0  | 0  | 0 | 0  | 0  | 0         | 0                | -1      |
| AT4G26890 | 0 | 1  | 0  | 1  | 0 | 0  | 0  | 0         | 0                | 1       |
| AT4G26940 | 0 | 1  | 0  | 1  | 0 | 0  | 1  | 0         | 0                | 1       |
| AT4G26960 | 0 | -1 | 0  | 0  | 0 | 0  | 0  | 0         | 0                | -1      |
| AT4G27170 | 0 | 0  | 0  | -1 | 0 | 0  | 0  | 0         | 0                | -1      |
| AT4G27300 | 0 | 0  | 0  | 0  | 0 | 0  | -1 | -1        | 0                | -1      |
| AT4G27310 | 0 | 1  | 0  | 1  | 0 | 1  | 0  | 0         | 0                | 1       |
| AT4G27400 | 0 | -1 | 0  | 0  | 0 | 0  | 0  | 0         | 0                | -1      |
| AT4G27460 | 0 | 1  | 0  | 1  | 0 | 1  | 0  | 0         | 0                | 1       |
| AT4G27520 | 0 | -1 | -1 | -1 | 0 | -1 | -1 | 0         | 0                | -1      |
| AT4G27670 | 0 | -1 | 0  | 0  | 0 | 0  | 0  | 0         | 0                | -1      |
| AT4G27700 | 0 | -1 | 0  | 0  | 0 | 0  | -1 | 0         | -1               | -1      |
| AT4G27710 | 0 | 0  | 0  | 0  | 0 | 0  | -1 | 0         | 0                | -1      |
| AT4G27820 | 0 | 0  | 0  | 0  | 0 | 0  | -1 | 0         | 0                | -1      |
| AT4G27860 | 0 | 0  | 0  | -1 | 0 | 0  | 0  | 0         | 0                | -1      |
| AT4G27950 | 0 | 0  | 0  | -1 | 0 | 0  | 0  | 0         | 0                | -1      |
| AT4G27980 | 0 | 0  | 0  | -1 | 0 | 0  | 0  | 0         | 0                | -1      |
| AT4G28030 | 0 | 0  | 0  | 0  | 0 | 0  | -1 | 0         | 0                | -1      |
| AT4G28080 | 0 | 0  | 0  | 0  | 0 | 0  | -1 | 0         | 0                | -1      |
| AT4G28170 | 0 | 0  | 0  | -1 | 0 | 0  | 0  | 0         | 0                | -1      |
| AT4G28180 | 0 | 0  | 0  | -1 | 0 | 0  | 0  | 0         | 0                | -1      |
| AT4G28190 | 0 | 0  | 0  | -1 | 0 | 0  | -1 | 0         | 0                | -1      |
| AT4G28250 | 0 | -1 | 0  | 0  | 0 | 0  | 0  | 0         | 0                | -1      |
| AT4G28350 | 0 | 1  | 0  | 1  | 0 | 0  | 0  | 0         | 0                | 1       |
| AT4G28410 | 0 | 1  | 0  | 1  | 0 | 1  | 0  | 0         | 0                | 1       |
| AT4G28420 | 0 | 0  | 0  | -1 | 0 | 0  | 0  | 0         | 0                | -1      |
| AT4G28460 | 0 | 0  | 0  | -1 | 0 | 0  | 0  | -1        | 0                | -1      |
| AT4G28560 | 0 | 1  | 0  | 1  | 0 | 0  | 0  | 0         | 0                | 1       |
| AT4G28660 | 0 | 0  | -1 | 0  | 0 | 0  | -1 | 0         | 0                | -1      |
| AT4G28680 | 0 | -1 | 0  | 0  | 0 | 0  | 0  | 0         | 0                | -1      |
| AT4G28706 | 0 | 0  | 0  | 0  | 0 | 0  | -1 | 0         | 0                | -1      |
| AT4G28720 | 1 | 0  | 0  | 1  | 1 | 0  | 0  | 0         | 0                | 1       |
| AT4G28750 | 0 | -1 | -1 | -1 | 0 | -1 | -1 | 0         | -1               | -1      |
| AT4G28780 | 0 | -1 | 0  | -1 | 0 | -1 | -1 | 0         | 0                | -1      |
| AT4G28950 | 0 | -1 | 0  | 0  | 0 | 0  | 0  | 0         | 0                | -1      |
| AT4G29030 | 0 | -1 | 0  | 0  | 0 | 0  | 0  | 0         | 0                | -1      |
| AT4G29140 | 0 | 1  | 0  | 1  | 0 | 0  | 1  | 0         | 0                | 1       |
| AT4G29270 | 0 | 0  | 1  | 1  | 0 | 0  | 1  | 1         | 0                | 1       |
| AT4G29370 | 0 | 0  | 0  | -1 | 0 | 0  | 0  | 0         | 0                | -1      |
| AT4G29690 | 0 | 0  | 0  | 1  | 0 | 0  | 1  | 0         | 0                | 1       |
| AT4G29700 | 0 | 0  | 0  | 1  | 0 | 0  | 1  | 1         | 0                | 1       |
| AT4G29905 | 0 | 0  | 0  | 0  | 0 | 0  | 0  | -1        | 0                | -1      |
| AT4G30060 | 0 | 1  | 0  | 1  | 0 | 0  | 1  | 0         | 0                | 1       |

Appendix Table S2

| Name      | 1  | 2  | 3  | 4  | 5 | 6  | 7  | pif45_Col | pif45bes1D_bes1D | ALL_PIF |
|-----------|----|----|----|----|---|----|----|-----------|------------------|---------|
| AT4G30170 | 0  | 0  | 0  | 1  | 0 | 0  | 1  | 0         | 0                | 1       |
| AT4G30180 | 0  | 1  | 0  | 1  | 0 | 1  | 0  | 0         | 0                | 1       |
| AT4G30230 | 0  | -1 | 0  | 0  | 0 | 0  | 0  | 0         | 0                | -1      |
| AT4G30280 | 0  | 0  | 0  | 1  | 0 | 0  | 1  | 0         | 0                | 1       |
| AT4G30410 | 0  | 1  | 1  | 1  | 0 | 0  | 0  | 0         | 0                | 1       |
| AT4G30440 | 0  | 0  | 0  | 0  | 0 | 0  | -1 | 0         | 0                | -1      |
| AT4G30470 | 1  | 0  | 0  | 1  | 0 | 0  | 0  | 0         | 0                | 1       |
| AT4G30690 | 0  | 0  | 0  | 0  | 0 | 0  | -1 | 0         | 0                | -1      |
| AT4G30800 | 0  | -1 | 0  | 0  | 0 | 0  | 0  | 0         | 0                | -1      |
| AT4G30810 | 0  | 0  | 0  | 0  | 0 | 0  | -1 | 0         | 0                | -1      |
| AT4G30990 | 0  | 0  | 0  | -1 | 0 | 0  | 0  | 0         | 0                | -1      |
| AT4G31000 | 0  | 1  | 0  | 1  | 0 | 0  | 0  | 0         | 0                | 1       |
| AT4G31320 | 0  | -1 | 0  | 0  | 0 | 0  | 0  | 0         | 0                | -1      |
| AT4G31351 | 0  | 0  | 0  | 0  | 0 | 0  | 0  | -1        | 0                | -1      |
| AT4G31370 | 0  | 1  | 0  | 1  | 0 | 0  | 0  | 0         | 0                | 1       |
| AT4G31380 | 0  | 1  | 0  | 1  | 0 | 1  | 0  | 0         | 1                | 1       |
| AT4G31610 | 0  | 1  | 0  | 1  | 0 | 0  | 0  | 0         | 0                | 1       |
| AT4G31700 | 0  | -1 | 0  | 0  | 0 | 0  | 0  | 0         | 0                | -1      |
| AT4G31760 | 0  | -1 | 0  | 0  | 0 | 0  | 0  | 0         | 0                | -1      |
| AT4G31805 | 0  | -1 | 0  | 0  | 0 | 0  | -1 | 0         | 0                | -1      |
| AT4G31830 | 0  | 1  | 0  | 0  | 0 | 0  | 1  | 0         | 0                | 1       |
| AT4G31840 | 0  | -1 | 0  | 0  | 0 | 0  | 0  | 0         | 0                | -1      |
| AT4G31900 | 0  | -1 | 0  | 0  | 0 | 0  | 0  | 0         | 0                | -1      |
| AT4G31940 | 0  | 0  | 0  | -1 | 0 | 0  | 0  | 0         | 0                | -1      |
| AT4G31950 | 0  | 0  | 0  | -1 | 0 | 0  | 0  | 0         | -1               | -1      |
| AT4G31970 | 0  | 0  | 0  | -1 | 0 | 0  | 0  | 0         | -1               | -1      |
| AT4G32070 | 0  | 0  | 0  | 1  | 0 | 0  | 1  | 0         | 0                | 1       |
| AT4G32260 | 0  | 0  | 0  | 0  | 0 | 0  | -1 | 0         | 0                | -1      |
| AT4G32280 | 1  | 1  | 0  | 1  | 1 | 1  | 1  | 0         | 1                | 1       |
| AT4G32340 | 0  | 0  | 0  | -1 | 0 | 0  | 0  | 0         | 0                | -1      |
| AT4G32350 | 1  | 0  | 0  | 1  | 0 | 0  | 0  | 0         | 0                | 1       |
| AT4G32500 | 0  | 1  | 0  | 1  | 0 | 1  | 0  | 0         | 0                | 1       |
| AT4G32590 | 0  | 0  | 0  | 0  | 0 | 0  | -1 | 0         | 0                | -1      |
| AT4G32800 | 0  | -1 | 0  | 0  | 0 | 0  | 0  | 0         | 0                | -1      |
| AT4G32950 | 0  | 1  | 0  | 1  | 0 | 0  | 0  | 0         | 0                | 1       |
| AT4G32980 | 0  | 0  | 0  | -1 | 0 | 0  | 0  | 0         | 0                | -1      |
| AT4G33000 | 0  | 0  | 0  | -1 | 0 | 0  | -1 | 0         | 0                | -1      |
| AT4G33010 | 0  | 0  | 0  | 0  | 0 | 0  | -1 | 0         | 0                | -1      |
| AT4G33040 | 1  | 0  | 0  | 1  | 0 | 0  | 1  | 0         | 0                | 1       |
| AT4G33070 | 0  | -1 | 0  | 0  | 0 | 0  | 0  | 0         | 0                | -1      |
| AT4G33260 | 1  | 0  | 0  | 1  | 0 | 0  | 0  | 0         | 0                | 1       |
| AT4G33470 | 0  | 0  | 0  | 0  | 0 | 0  | -1 | 0         | 0                | -1      |
| AT4G33540 | -1 | 0  | 0  | 0  | 0 | 0  | 0  | 0         | 0                | -1      |
| AT4G33550 | 0  | 0  | 0  | 1  | 0 | 0  | 0  | 1         | 0                | 1       |
| AT4G33660 | 0  | -1 | 0  | 0  | 0 | 0  | -1 | 0         | 0                | -1      |
| AT4G33905 | 0  | -1 | 0  | 0  | 0 | 0  | 0  | 0         | 0                | -1      |
| AT4G34090 | 0  | 0  | 0  | 0  | 0 | 0  | -1 | 0         | 0                | -1      |
| AT4G34131 | 0  | 0  | 0  | 0  | 0 | 0  | -1 | 0         | 0                | -1      |
| AT4G34160 | 0  | 0  | 0  | 0  | 0 | 0  | -1 | 0         | 0                | -1      |
| AT4G34190 | 0  | -1 | 0  | 0  | 0 | 0  | 0  | 0         | 0                | -1      |
| AT4G34220 | 0  | -1 | 0  | -1 | 0 | 0  | -1 | 0         | 0                | -1      |
| AT4G34290 | 0  | 0  | -1 | 0  | 0 | 0  | 0  | 0         | 0                | -1      |
| AT4G34419 | 0  | -1 | 0  | 0  | 0 | 0  | 0  | 0         | 0                | -1      |
| AT4G34440 | -1 | 0  | 0  | 0  | 0 | 0  | 0  | 0         | 0                | -1      |
| AT4G34510 | 0  | -1 | 0  | 0  | 0 | 0  | 0  | 0         | 0                | -1      |
| AT4G34530 | 0  | 1  | 0  | 0  | 0 | 1  | 0  | 0         | 0                | 1       |
| AT4G34540 | 0  | 0  | 0  | -1 | 0 | 0  | 0  | 0         | 0                | -1      |
| AT4G34590 | 0  | 0  | 0  | 0  | 0 | 0  | -1 | 0         | 0                | -1      |
| AT4G34610 | 0  | -1 | 0  | 0  | 0 | -1 | -1 | 0         | 0                | -1      |
| AT4G34740 | 0  | -1 | 0  | 0  | 0 | 0  | 0  | 0         | 0                | -1      |
| AT4G34770 | 1  | 1  | 0  | 1  | 1 | 1  | 1  | 0         | 0                | 1       |



Appendix Table S2

| Name      | 1 | 2  | 3  | 4  | 5 | 6  | 7  | pif45_Col | pif45bes1D_bes1D | ALL_PIF |
|-----------|---|----|----|----|---|----|----|-----------|------------------|---------|
| AT4G34790 | 0 | -1 | 0  | 0  | 0 | 0  | 0  | 0         | 0                | -1      |
| AT4G34930 | 0 | 0  | 0  | 0  | 0 | 0  | -1 | 0         | 0                | -1      |
| AT4G34950 | 0 | -1 | 0  | -1 | 0 | -1 | 0  | 0         | 0                | -1      |
| AT4G34980 | 0 | 0  | 0  | 0  | 0 | 0  | -1 | 0         | 0                | -1      |
| AT4G35070 | 0 | 0  | 0  | 1  | 0 | 1  | 0  | 0         | 0                | 1       |
| AT4G35190 | 0 | 1  | 0  | 1  | 0 | 1  | 0  | 0         | 0                | 1       |
| AT4G35250 | 0 | 0  | 0  | 0  | 0 | 0  | -1 | 0         | 0                | -1      |
| AT4G35320 | 1 | 0  | 0  | 1  | 0 | 0  | 0  | 0         | 0                | 1       |
| AT4G35560 | 0 | 0  | 0  | 1  | 0 | 0  | 1  | 0         | 0                | 1       |
| AT4G35720 | 0 | 1  | 1  | 1  | 1 | 1  | 1  | 0         | 1                | 1       |
| AT4G35730 | 0 | -1 | 0  | 0  | 0 | 0  | 0  | 0         | 0                | -1      |
| AT4G35770 | 0 | 1  | 0  | 0  | 0 | 0  | 1  | 0         | 0                | 1       |
| AT4G35810 | 0 | 0  | 0  | -1 | 0 | 0  | 0  | 0         | 0                | -1      |
| AT4G35930 | 0 | -1 | 0  | 0  | 0 | 0  | 0  | 0         | 0                | -1      |
| AT4G36010 | 0 | 1  | 0  | 1  | 0 | 0  | 1  | 0         | 0                | 1       |
| AT4G36110 | 0 | 1  | 1  | 1  | 1 | 0  | 1  | 0         | 0                | 1       |
| AT4G36220 | 0 | -1 | 0  | 0  | 0 | 0  | -1 | 0         | 0                | -1      |
| AT4G36240 | 0 | -1 | 0  | 0  | 0 | 0  | 0  | 0         | 0                | -1      |
| AT4G36360 | 1 | 0  | 0  | 1  | 0 | 0  | 0  | 1         | 0                | 1       |
| AT4G36600 | 0 | -1 | 0  | 0  | 0 | 0  | 0  | 0         | 0                | -1      |
| AT4G36610 | 0 | -1 | 0  | 0  | 0 | 0  | 0  | 0         | 0                | -1      |
| AT4G36700 | 0 | -1 | 0  | 0  | 0 | 0  | 0  | 0         | 0                | -1      |
| AT4G36770 | 0 | -1 | 0  | 0  | 0 | 0  | 0  | 0         | 0                | -1      |
| AT4G36830 | 0 | -1 | 0  | 0  | 0 | 0  | 0  | 0         | 0                | -1      |
| AT4G37050 | 0 | 1  | 0  | 1  | 0 | 0  | 0  | 0         | 0                | 1       |
| AT4G37080 | 0 | 0  | 0  | 0  | 0 | 0  | -1 | 0         | 0                | -1      |
| AT4G37150 | 0 | -1 | 0  | 0  | 0 | 0  | -1 | 0         | 0                | -1      |
| AT4G37160 | 0 | -1 | 0  | 0  | 0 | 0  | 0  | 0         | 0                | -1      |
| AT4G37235 | 0 | -1 | 0  | 0  | 0 | 0  | 0  | 0         | 0                | -1      |
| AT4G37240 | 0 | 0  | 0  | 1  | 0 | 0  | 1  | 0         | 0                | 1       |
| AT4G37290 | 0 | 0  | 0  | 0  | 0 | 0  | 0  | -1        | 0                | -1      |
| AT4G37295 | 0 | -1 | 0  | 0  | 0 | 0  | 0  | 0         | 0                | -1      |
| AT4G37300 | 0 | 0  | 0  | 0  | 0 | 0  | -1 | 0         | 0                | -1      |
| AT4G37370 | 0 | 0  | 0  | -1 | 0 | 0  | 0  | 0         | 0                | -1      |
| AT4G37430 | 0 | -1 | 0  | 0  | 0 | 0  | 0  | 0         | 0                | -1      |
| AT4G37470 | 0 | -1 | 0  | -1 | 0 | 0  | -1 | 0         | 0                | -1      |
| AT4G37490 | 0 | -1 | 0  | 0  | 0 | 0  | 0  | 0         | 0                | -1      |
| AT4G37530 | 0 | 0  | 0  | 1  | 0 | 0  | 1  | 0         | 0                | 1       |
| AT4G37540 | 0 | 0  | 0  | 0  | 0 | 0  | -1 | 0         | 0                | -1      |
| AT4G37550 | 0 | 0  | 0  | 0  | 0 | 0  | -1 | 0         | 0                | -1      |
| AT4G37560 | 0 | 0  | 0  | 0  | 0 | 0  | -1 | 0         | 0                | -1      |
| AT4G37580 | 0 | 0  | 0  | 1  | 0 | 1  | 0  | 0         | 0                | 1       |
| AT4G37670 | 0 | 0  | 0  | -1 | 0 | 0  | 0  | 0         | 0                | -1      |
| AT4G37740 | 0 | 1  | 0  | 1  | 0 | 1  | 1  | 0         | 0                | 1       |
| AT4G37760 | 0 | 1  | 0  | 0  | 0 | 0  | 1  | 0         | 0                | 1       |
| AT4G37770 | 1 | 1  | 0  | 1  | 1 | 0  | 0  | 0         | 0                | 1       |
| AT4G37800 | 0 | -1 | -1 | -1 | 0 | 0  | -1 | 0         | 0                | -1      |
| AT4G37810 | 0 | -1 | 0  | -1 | 0 | 0  | 0  | 0         | 0                | -1      |
| AT4G37850 | 0 | 0  | 0  | -1 | 0 | 0  | 0  | 0         | 0                | -1      |
| AT4G37890 | 0 | 0  | 0  | 1  | 1 | 0  | 0  | 0         | 0                | 1       |
| AT4G37930 | 0 | 0  | 0  | 0  | 0 | 0  | -1 | 0         | 0                | -1      |
| AT4G38080 | 0 | -1 | 0  | 0  | 0 | 0  | 0  | 0         | 0                | -1      |
| AT4G38100 | 0 | -1 | 0  | 0  | 0 | 0  | 0  | 0         | 0                | -1      |
| AT4G38400 | 1 | 1  | 1  | 1  | 0 | 0  | 1  | 0         | 0                | 1       |
| AT4G38410 | 0 | 0  | 0  | -1 | 0 | 0  | 0  | 0         | 0                | -1      |
| AT4G38420 | 0 | 0  | 0  | 0  | 0 | 0  | -1 | 0         | 0                | -1      |
| AT4G38560 | 0 | 0  | 0  | -1 | 0 | 0  | 0  | 0         | 0                | -1      |
| AT4G38580 | 0 | 1  | 0  | 1  | 0 | 0  | 1  | 0         | 0                | 1       |
| AT4G38690 | 0 | 0  | 0  | 0  | 0 | 0  | -1 | 0         | 0                | -1      |
| AT4G38700 | 0 | -1 | 0  | 0  | 0 | 0  | 0  | 0         | 0                | -1      |
| AT4G38740 | 0 | 0  | 0  | -1 | 0 | 0  | 0  | 0         | 0                | -1      |

Appendix Table S2

| Name      | 1  | 2  | 3  | 4  | 5 | 6  | 7  | pif45_Col | pif45bes1D_bes1D | ALL_PIF |
|-----------|----|----|----|----|---|----|----|-----------|------------------|---------|
| AT4G38840 | 0  | -1 | 0  | -1 | 0 | -1 | -1 | 0         | 0                | -1      |
| AT4G38970 | 0  | -1 | 0  | 0  | 0 | -1 | -1 | 0         | 0                | -1      |
| AT4G39110 | 0  | 0  | 0  | -1 | 0 | 0  | 0  | 0         | 0                | -1      |
| AT4G39235 | 0  | 0  | 0  | 0  | 0 | 0  | -1 | 0         | 0                | -1      |
| AT4G39300 | 0  | -1 | 0  | 0  | 0 | 0  | 0  | 0         | 0                | -1      |
| AT4G39330 | 0  | 0  | 0  | 0  | 0 | 0  | -1 | 0         | 0                | -1      |
| AT4G39480 | 0  | -1 | 0  | 0  | 0 | 0  | 0  | 0         | 0                | -1      |
| AT4G39510 | 0  | -1 | -1 | 0  | 0 | -1 | -1 | 0         | 0                | -1      |
| AT4G39710 | 0  | 0  | -1 | 0  | 0 | 0  | -1 | 0         | 0                | -1      |
| AT4G39740 | 0  | -1 | 0  | 0  | 0 | 0  | 0  | 0         | 0                | -1      |
| AT4G39900 | 0  | 0  | 0  | 0  | 0 | 0  | 0  | -1        | 0                | -1      |
| AT4G39940 | 0  | 0  | 0  | -1 | 0 | 0  | 0  | 0         | -1               | -1      |
| AT4G39950 | 0  | 0  | 0  | -1 | 0 | 0  | 0  | 0         | -1               | -1      |
| AT4G39970 | 0  | 0  | 0  | 0  | 0 | 0  | -1 | 0         | 0                | -1      |
| AT4G40090 | 0  | 0  | 0  | 1  | 0 | 0  | 1  | 0         | 0                | 1       |
| AT5G01050 | 0  | 0  | 0  | 0  | 0 | 0  | -1 | 0         | 0                | -1      |
| AT5G01240 | 0  | 0  | 0  | 0  | 0 | 0  | -1 | 0         | 0                | -1      |
| AT5G01320 | 0  | 0  | 0  | 1  | 0 | 0  | 1  | 0         | 0                | 1       |
| AT5G01330 | 0  | 1  | 0  | 1  | 0 | 1  | 0  | 0         | 0                | 1       |
| AT5G01420 | 0  | -1 | 0  | 0  | 0 | 0  | 0  | 0         | 0                | -1      |
| AT5G01520 | 0  | 0  | 0  | 1  | 0 | 0  | 1  | 0         | 0                | 1       |
| AT5G01530 | 0  | -1 | 0  | 0  | 0 | -1 | -1 | 0         | 0                | -1      |
| AT5G01790 | 0  | 1  | 0  | 1  | 0 | 0  | 1  | 0         | 0                | 1       |
| AT5G02020 | 0  | 1  | 0  | 1  | 0 | 0  | 0  | 0         | 0                | 1       |
| AT5G02050 | 0  | -1 | 0  | 0  | 0 | 0  | 0  | 0         | 0                | -1      |
| AT5G02120 | 0  | 0  | 0  | 0  | 0 | 0  | -1 | 0         | 0                | -1      |
| AT5G02160 | 0  | 0  | 0  | 0  | 0 | -1 | -1 | 0         | 0                | -1      |
| AT5G02200 | 1  | 1  | 0  | 1  | 0 | 0  | 1  | 0         | 0                | 1       |
| AT5G02230 | 1  | 1  | 0  | 1  | 0 | 0  | 0  | 0         | 0                | 1       |
| AT5G02440 | -1 | 0  | 0  | 0  | 0 | 0  | -1 | 0         | 0                | -1      |
| AT5G02490 | 0  | -1 | 0  | 0  | 0 | 0  | 0  | 0         | 0                | -1      |
| AT5G02540 | 1  | 1  | 1  | 1  | 1 | 1  | 1  | 0         | 1                | 1       |
| AT5G02580 | 0  | 1  | 1  | 1  | 0 | 1  | 1  | 0         | 1                | 1       |
| AT5G02780 | 0  | 0  | 0  | 0  | 0 | 0  | 0  | 0         | -1               | -1      |
| AT5G02810 | 0  | 0  | 0  | 0  | 0 | 0  | -1 | 0         | 0                | -1      |
| AT5G02830 | 0  | 0  | 0  | 0  | 0 | 0  | -1 | 0         | 0                | -1      |
| AT5G02840 | 0  | 0  | 0  | 0  | 0 | 0  | -1 | 0         | 0                | -1      |
| AT5G02890 | 1  | 0  | 0  | 0  | 0 | 0  | 0  | 1         | 0                | 1       |
| AT5G02940 | 0  | 0  | 0  | 0  | 0 | 0  | -1 | 0         | 0                | -1      |
| AT5G03150 | 1  | 0  | 0  | 0  | 1 | 0  | 0  | 0         | 0                | 1       |
| AT5G03160 | 0  | 0  | 0  | 0  | 0 | -1 | 0  | 0         | 0                | -1      |
| AT5G03210 | 0  | 1  | 0  | 1  | 0 | 0  | 0  | 0         | 0                | 1       |
| AT5G03230 | 1  | 0  | 0  | 0  | 0 | 0  | 1  | 0         | 0                | 1       |
| AT5G03390 | 0  | -1 | 0  | 0  | 0 | 0  | 0  | 0         | 0                | -1      |
| AT5G03555 | 0  | 0  | 0  | -1 | 0 | 0  | -1 | 0         | 0                | -1      |
| AT5G03570 | 0  | 0  | 0  | -1 | 0 | 0  | 0  | 0         | 0                | -1      |
| AT5G03760 | 1  | 0  | 0  | 1  | 0 | 0  | 0  | 0         | 0                | 1       |
| AT5G03790 | 0  | 0  | 0  | -1 | 0 | 0  | 0  | 0         | 0                | -1      |
| AT5G03840 | 0  | -1 | 0  | 0  | 0 | 0  | 0  | 0         | 0                | -1      |
| AT5G03995 | 0  | 0  | 0  | -1 | 0 | 0  | 0  | 0         | 0                | -1      |
| AT5G04120 | 0  | 1  | 1  | 0  | 0 | 1  | 1  | 0         | 0                | 1       |
| AT5G04140 | 0  | 0  | 0  | 0  | 0 | 0  | -1 | 0         | 0                | -1      |
| AT5G04180 | 0  | 0  | 0  | -1 | 0 | 0  | 0  | 0         | 0                | -1      |
| AT5G04230 | 0  | -1 | 0  | -1 | 0 | 0  | 0  | 0         | 0                | -1      |
| AT5G04470 | 0  | 0  | 0  | 1  | 0 | 0  | 1  | 0         | 0                | 1       |
| AT5G04490 | -1 | 0  | 0  | 0  | 0 | 0  | -1 | 0         | 0                | -1      |
| AT5G04530 | 0  | 0  | 0  | 0  | 0 | 0  | -1 | 0         | 0                | -1      |
| AT5G04690 | 0  | 0  | 0  | -1 | 0 | 0  | 0  | 0         | 0                | -1      |
| AT5G04770 | 0  | 1  | 0  | 0  | 0 | 0  | 1  | 0         | 0                | 1       |
| AT5G04950 | 0  | -1 | 0  | -1 | 0 | 0  | 0  | 0         | 0                | -1      |
| AT5G05250 | 0  | 0  | 0  | -1 | 0 | 0  | 0  | 0         | 0                | -1      |



Appendix Table S2

| Name      | 1 | 2  | 3  | 4  | 5  | 6  | 7  | pif45_Col | pif45bes1D_bes1D | ALL_PIF |
|-----------|---|----|----|----|----|----|----|-----------|------------------|---------|
| AT5G11000 | 0 | 0  | 0  | 1  | 0  | 0  | 1  | 0         | 0                | 1       |
| AT5G11060 | 0 | -1 | 0  | 0  | 0  | 0  | 0  | 0         | 0                | -1      |
| AT5G11070 | 0 | 0  | -1 | -1 | 0  | 0  | -1 | 0         | 0                | -1      |
| AT5G11100 | 0 | 1  | 0  | 1  | 0  | 0  | 0  | 0         | 0                | 1       |
| AT5G11140 | 0 | 0  | 0  | -1 | 0  | 0  | 0  | -1        | 0                | -1      |
| AT5G11240 | 0 | -1 | 0  | 0  | 0  | 0  | 0  | 0         | 0                | -1      |
| AT5G11260 | 0 | 1  | 0  | 0  | 0  | 0  | 1  | 0         | 0                | 1       |
| AT5G11320 | 0 | 0  | 0  | -1 | 0  | 0  | 0  | 0         | 0                | -1      |
| AT5G11412 | 0 | -1 | 0  | -1 | 0  | 0  | 0  | 0         | 0                | -1      |
| AT5G11450 | 0 | 0  | -1 | 0  | 0  | 0  | 0  | 0         | 0                | -1      |
| AT5G11590 | 0 | -1 | 0  | 0  | 0  | 0  | 0  | 0         | 0                | -1      |
| AT5G11920 | 0 | 1  | 0  | 1  | 0  | 0  | 1  | 0         | 0                | 1       |
| AT5G11970 | 1 | 0  | 0  | 1  | 0  | 0  | 0  | 0         | 0                | 1       |
| AT5G12110 | 0 | -1 | 0  | 0  | 0  | 0  | -1 | 0         | 0                | -1      |
| AT5G12250 | 1 | 0  | 0  | 1  | 0  | 0  | 0  | 0         | 0                | 1       |
| AT5G12860 | 0 | -1 | 0  | 0  | 0  | 0  | -1 | 0         | 0                | -1      |
| AT5G12940 | 1 | 0  | 1  | 1  | 0  | 0  | 1  | 0         | 0                | 1       |
| AT5G13210 | 0 | -1 | 0  | -1 | 0  | 0  | 0  | 0         | 0                | -1      |
| AT5G13230 | 0 | 0  | 0  | -1 | 0  | 0  | 0  | 0         | 0                | -1      |
| AT5G13270 | 0 | -1 | 0  | 0  | 0  | 0  | 0  | 0         | 0                | -1      |
| AT5G13320 | 1 | 1  | 0  | 0  | 0  | 0  | 0  | 0         | 0                | 1       |
| AT5G13630 | 0 | -1 | -1 | 0  | 0  | 0  | -1 | 0         | 0                | -1      |
| AT5G13720 | 0 | 0  | 0  | 0  | 0  | 0  | -1 | 0         | 0                | -1      |
| AT5G13730 | 0 | 0  | 0  | 0  | 0  | 0  | -1 | 0         | 0                | -1      |
| AT5G13770 | 0 | -1 | -1 | 0  | 0  | 0  | -1 | 0         | -1               | -1      |
| AT5G13870 | 0 | 0  | 0  | 1  | 0  | 0  | 1  | 0         | 0                | 1       |
| AT5G13930 | 0 | -1 | -1 | -1 | -1 | 0  | 0  | 0         | 0                | -1      |
| AT5G14060 | 0 | -1 | 0  | -1 | 0  | 0  | 0  | 0         | 0                | -1      |
| AT5G14100 | 0 | -1 | 0  | 0  | 0  | 0  | 0  | 0         | 0                | -1      |
| AT5G14110 | 0 | -1 | 0  | 0  | 0  | 0  | 0  | 0         | 0                | -1      |
| AT5G14120 | 0 | 0  | 0  | 0  | 0  | 0  | -1 | 0         | 0                | -1      |
| AT5G14200 | 0 | -1 | 0  | 0  | 0  | 0  | 0  | 0         | -1               | -1      |
| AT5G14240 | 0 | 0  | 0  | 0  | 0  | 0  | 0  | -1        | 0                | -1      |
| AT5G14320 | 0 | 0  | 0  | 0  | 0  | -1 | 0  | 0         | 0                | -1      |
| AT5G14360 | 0 | 1  | 0  | 0  | 0  | 1  | 0  | 0         | 0                | 1       |
| AT5G14370 | 0 | 0  | 0  | -1 | 0  | 0  | 0  | 0         | 0                | -1      |
| AT5G14410 | 0 | 0  | 0  | 0  | 0  | 0  | -1 | 0         | 0                | -1      |
| AT5G14450 | 0 | -1 | 0  | -1 | 0  | 0  | -1 | 0         | 0                | -1      |
| AT5G14510 | 0 | 0  | 0  | -1 | 0  | 0  | 0  | 0         | 0                | -1      |
| AT5G14580 | 0 | -1 | 0  | 0  | 0  | 0  | 0  | 0         | 0                | -1      |
| AT5G14650 | 0 | 0  | 0  | -1 | 0  | 0  | 0  | 0         | 0                | -1      |
| AT5G14730 | 0 | 0  | 0  | 0  | 0  | 0  | -1 | 0         | 0                | -1      |
| AT5G14780 | 0 | 1  | 0  | 0  | 0  | 0  | 1  | 0         | 0                | 1       |
| AT5G14830 | 0 | 0  | 0  | -1 | 0  | 0  | 0  | 0         | 0                | -1      |
| AT5G14920 | 1 | 1  | 0  | 0  | 0  | 0  | 1  | 0         | 0                | 1       |
| AT5G15150 | 1 | 1  | 1  | 1  | 0  | 0  | 1  | 0         | 0                | 1       |
| AT5G15230 | 0 | 0  | 0  | 1  | 0  | 0  | 0  | 1         | 0                | 1       |
| AT5G15265 | 0 | 0  | 0  | 1  | 0  | 0  | 0  | 0         | 1                | 1       |
| AT5G15310 | 0 | -1 | 0  | -1 | 0  | 0  | -1 | 0         | 0                | -1      |
| AT5G15420 | 0 | 0  | 0  | -1 | 0  | 0  | 0  | 0         | 0                | -1      |
| AT5G15490 | 1 | 0  | 0  | 1  | 0  | 0  | 1  | 0         | 0                | 1       |
| AT5G15580 | 1 | 0  | 0  | 0  | 1  | 0  | 0  | 0         | 0                | 1       |
| AT5G15720 | 0 | 0  | 0  | 1  | 0  | 1  | 0  | 0         | 0                | 1       |
| AT5G15830 | 0 | 1  | 0  | 0  | 0  | 0  | 1  | 0         | 0                | 1       |
| AT5G15850 | 0 | 0  | 0  | 0  | 0  | 0  | -1 | -1        | 0                | -1      |
| AT5G15960 | 1 | 0  | 0  | 0  | 0  | 0  | 1  | 0         | 0                | 1       |
| AT5G16010 | 0 | 0  | 0  | 0  | 0  | 0  | -1 | 0         | 0                | -1      |
| AT5G16030 | 0 | -1 | 0  | -1 | 0  | -1 | -1 | 0         | 0                | -1      |
| AT5G16190 | 0 | 0  | 0  | 0  | 0  | 0  | -1 | 0         | 0                | -1      |
| AT5G16240 | 0 | 0  | 0  | 0  | 0  | 0  | -1 | 0         | 0                | -1      |
| AT5G16360 | 0 | 1  | 0  | 1  | 0  | 0  | 0  | 0         | 0                | 1       |

Appendix Table S2

| Name      | 1 | 2  | 3  | 4  | 5  | 6  | 7  | pif45_Col | pif45bes1D_bes1D | ALL_PIF |
|-----------|---|----|----|----|----|----|----|-----------|------------------|---------|
| AT5G16400 | 0 | 0  | 0  | 0  | 0  | 0  | -1 | 0         | 0                | -1      |
| AT5G16540 | 0 | 0  | 0  | 0  | 0  | 0  | -1 | 0         | 0                | -1      |
| AT5G16590 | 0 | 0  | 0  | 1  | 0  | 0  | 1  | 0         | 0                | 1       |
| AT5G16810 | 0 | 0  | 0  | 0  | 0  | 0  | -1 | 0         | 0                | -1      |
| AT5G16980 | 0 | 0  | 0  | 0  | 0  | 0  | -1 | 0         | 0                | -1      |
| AT5G17170 | 0 | 0  | 0  | 0  | 0  | 0  | -1 | 0         | 0                | -1      |
| AT5G17220 | 0 | 0  | 0  | 0  | -1 | 0  | 0  | -1        | -1               | -1      |
| AT5G17230 | 0 | -1 | -1 | 0  | 0  | 0  | -1 | 0         | -1               | -1      |
| AT5G17300 | 0 | 0  | 0  | -1 | -1 | 0  | -1 | 0         | 0                | -1      |
| AT5G17590 | 0 | -1 | 0  | 0  | 0  | 0  | 0  | 0         | 0                | -1      |
| AT5G17670 | 0 | 0  | 0  | 0  | 0  | 0  | -1 | 0         | 0                | -1      |
| AT5G17780 | 0 | 0  | 0  | 1  | 0  | 0  | 0  | 1         | 0                | 1       |
| AT5G17850 | 0 | 1  | 0  | 1  | 0  | 0  | 1  | 0         | 0                | 1       |
| AT5G17880 | 0 | 0  | 0  | -1 | 0  | 0  | 0  | 0         | 0                | -1      |
| AT5G18000 | 0 | 1  | 0  | 0  | 0  | 1  | 0  | 0         | 0                | 1       |
| AT5G18010 | 0 | 1  | 0  | 1  | 0  | 0  | 0  | 0         | 0                | 1       |
| AT5G18030 | 0 | 1  | 0  | 1  | 0  | 0  | 0  | 0         | 0                | 1       |
| AT5G18060 | 1 | 1  | 1  | 1  | 1  | 0  | 1  | 0         | 0                | 1       |
| AT5G18140 | 0 | 0  | 0  | 0  | 0  | 0  | -1 | 0         | 0                | -1      |
| AT5G18340 | 0 | 0  | 0  | -1 | 0  | 0  | 0  | 0         | 0                | -1      |
| AT5G18430 | 0 | -1 | 0  | 0  | 0  | 0  | 0  | 0         | 0                | -1      |
| AT5G18600 | 0 | 0  | 0  | 0  | 0  | 0  | -1 | 0         | 0                | -1      |
| AT5G18660 | 0 | -1 | -1 | 0  | 0  | 0  | -1 | 0         | 0                | -1      |
| AT5G18690 | 0 | 0  | 0  | 1  | 0  | 0  | 1  | 0         | 0                | 1       |
| AT5G18770 | 0 | 0  | 0  | -1 | 0  | 0  | 0  | 0         | 0                | -1      |
| AT5G18840 | 0 | 0  | 0  | -1 | 0  | 0  | 0  | 0         | 0                | -1      |
| AT5G18850 | 0 | 0  | 0  | 0  | 0  | 0  | -1 | 0         | 0                | -1      |
| AT5G19120 | 0 | 0  | 0  | 0  | 0  | 0  | -1 | 0         | 0                | -1      |
| AT5G19210 | 0 | -1 | 0  | 0  | 0  | 0  | 0  | 0         | 0                | -1      |
| AT5G19220 | 0 | 0  | 0  | 0  | 0  | 0  | -1 | 0         | 0                | -1      |
| AT5G19230 | 0 | 1  | 0  | 1  | 0  | 0  | 0  | 0         | 0                | 1       |
| AT5G19500 | 0 | -1 | 0  | -1 | 0  | 0  | -1 | 0         | 0                | -1      |
| AT5G19520 | 0 | 0  | 0  | -1 | 0  | 0  | 0  | 0         | 0                | -1      |
| AT5G19600 | 0 | 1  | 0  | 1  | 0  | 0  | 0  | 0         | 0                | 1       |
| AT5G19750 | 0 | -1 | 0  | 0  | 0  | 0  | 0  | 0         | 0                | -1      |
| AT5G19875 | 0 | 1  | 0  | 1  | 0  | 0  | 0  | 0         | 0                | 1       |
| AT5G19880 | 0 | 0  | 0  | -1 | 0  | 0  | 0  | 0         | 0                | -1      |
| AT5G19940 | 0 | -1 | -1 | 0  | 0  | 0  | -1 | 0         | 0                | -1      |
| AT5G20160 | 0 | -1 | 0  | 0  | 0  | 0  | 0  | 0         | 0                | -1      |
| AT5G20220 | 0 | 0  | 0  | -1 | 0  | 0  | -1 | 0         | 0                | -1      |
| AT5G20230 | 0 | 0  | 0  | -1 | 0  | 0  | 0  | -1        | 0                | -1      |
| AT5G20320 | 0 | 0  | 0  | 0  | 0  | 0  | -1 | 0         | 0                | -1      |
| AT5G20630 | 0 | -1 | 0  | 0  | 0  | -1 | 0  | 0         | 0                | -1      |
| AT5G20635 | 0 | 0  | 0  | -1 | 0  | 0  | 0  | 0         | 0                | -1      |
| AT5G20670 | 0 | 1  | 0  | 1  | 0  | 0  | 0  | 0         | 0                | 1       |
| AT5G20710 | 0 | 0  | 0  | 1  | 0  | 0  | 1  | 0         | 0                | 1       |
| AT5G20935 | 0 | 0  | 0  | 0  | 0  | 0  | -1 | 0         | 0                | -1      |
| AT5G21430 | 0 | -1 | 0  | 0  | 0  | 0  | 0  | 0         | -1               | -1      |
| AT5G21482 | 0 | -1 | 0  | -1 | 0  | 0  | 0  | 0         | 0                | -1      |
| AT5G22100 | 0 | -1 | 0  | 0  | 0  | 0  | 0  | 0         | 0                | -1      |
| AT5G22270 | 0 | 0  | 0  | 0  | 0  | 0  | -1 | 0         | 0                | -1      |
| AT5G22310 | 1 | 1  | 0  | 0  | 0  | 0  | 0  | 0         | 0                | 1       |
| AT5G22355 | 0 | 1  | 0  | 1  | 0  | 0  | 0  | 0         | 0                | 1       |
| AT5G22390 | 0 | -1 | 0  | -1 | 0  | 0  | -1 | 0         | 0                | -1      |
| AT5G22440 | 0 | -1 | 0  | 0  | 0  | 0  | 0  | 0         | 0                | -1      |
| AT5G22500 | 1 | 1  | 1  | 1  | 1  | 0  | 1  | 0         | 0                | 1       |
| AT5G22520 | 0 | 0  | 0  | 0  | 0  | 0  | 0  | -1        | 0                | -1      |
| AT5G22530 | 0 | 0  | 0  | 0  | 0  | 0  | 0  | -1        | 0                | -1      |
| AT5G22555 | 0 | -1 | 0  | 0  | 0  | 0  | 0  | 0         | -1               | -1      |
| AT5G22580 | 1 | 0  | 0  | 1  | 1  | 0  | 0  | 0         | 0                | 1       |
| AT5G22620 | 0 | 0  | 0  | 0  | 0  | 0  | -1 | 0         | 0                | -1      |



Appendix Table S2

| Name      | 1  | 2  | 3 | 4  | 5  | 6  | 7  | pif45_Col | pif45bes1D_bes1D | ALL_PIF |
|-----------|----|----|---|----|----|----|----|-----------|------------------|---------|
| AT5G27350 | 0  | 0  | 0 | 0  | 0  | 0  | -1 | 0         | 0                | -1      |
| AT5G27360 | 0  | -1 | 0 | 0  | 0  | 0  | -1 | 0         | 0                | -1      |
| AT5G27770 | 0  | -1 | 0 | 0  | 0  | 0  | 0  | 0         | 0                | -1      |
| AT5G27850 | 0  | -1 | 0 | 0  | 0  | 0  | 0  | 0         | 0                | -1      |
| AT5G27889 | 0  | 0  | 0 | -1 | 0  | 0  | 0  | 0         | 0                | -1      |
| AT5G27890 | 0  | 0  | 0 | -1 | 0  | 0  | 0  | 0         | 0                | -1      |
| AT5G27895 | 0  | 0  | 0 | -1 | 0  | 0  | 0  | 0         | 0                | -1      |
| AT5G28010 | 0  | 0  | 0 | 0  | 0  | -1 | 0  | 0         | 0                | -1      |
| AT5G28020 | 0  | 0  | 0 | 1  | 0  | 0  | 1  | 0         | 0                | 1       |
| AT5G28050 | 0  | 0  | 0 | -1 | 0  | 0  | 0  | 0         | 0                | -1      |
| AT5G28080 | 0  | 1  | 0 | 1  | 0  | 0  | 1  | 0         | 0                | 1       |
| AT5G28145 | 0  | 0  | 0 | -1 | 0  | 0  | 0  | 0         | 0                | -1      |
| AT5G28263 | 0  | 0  | 0 | -1 | 0  | 0  | 0  | 0         | 0                | -1      |
| AT5G28470 | -1 | 0  | 0 | 0  | 0  | 0  | 0  | 0         | 0                | -1      |
| AT5G28610 | 0  | 0  | 0 | -1 | 0  | 0  | 0  | 0         | 0                | -1      |
| AT5G28622 | 0  | 0  | 0 | -1 | 0  | 0  | 0  | 0         | 0                | -1      |
| AT5G28770 | 0  | 0  | 0 | 0  | 0  | 0  | -1 | 0         | 0                | -1      |
| AT5G28773 | 0  | -1 | 0 | 0  | 0  | 0  | 0  | 0         | 0                | -1      |
| AT5G28919 | 0  | 0  | 0 | -1 | 0  | 0  | 0  | 0         | 0                | -1      |
| AT5G28960 | 0  | -1 | 0 | 0  | 0  | 0  | 0  | 0         | 0                | -1      |
| AT5G33390 | 0  | 0  | 0 | -1 | 0  | 0  | 0  | 0         | 0                | -1      |
| AT5G33395 | 0  | 0  | 0 | -1 | 0  | 0  | 0  | 0         | 0                | -1      |
| AT5G34795 | 0  | 0  | 0 | -1 | 0  | 0  | 0  | 0         | 0                | -1      |
| AT5G34871 | 0  | 0  | 0 | -1 | 0  | 0  | 0  | 0         | 0                | -1      |
| AT5G35170 | 0  | 0  | 0 | 0  | 0  | 0  | -1 | 0         | 0                | -1      |
| AT5G35407 | 0  | 0  | 0 | -1 | 0  | 0  | 0  | 0         | 0                | -1      |
| AT5G35420 | 0  | -1 | 0 | 0  | 0  | 0  | 0  | 0         | 0                | -1      |
| AT5G35450 | 0  | 0  | 0 | -1 | 0  | 0  | 0  | 0         | 0                | -1      |
| AT5G35480 | 0  | 0  | 0 | 0  | 0  | -1 | 0  | 0         | 0                | -1      |
| AT5G35525 | 0  | 1  | 0 | 1  | 0  | 0  | 0  | 0         | 0                | 1       |
| AT5G35777 | 0  | 0  | 0 | -1 | 0  | 0  | 0  | 0         | 0                | -1      |
| AT5G35790 | 0  | 0  | 0 | 0  | 0  | 0  | -1 | 0         | 0                | -1      |
| AT5G35914 | 0  | 0  | 0 | -1 | 0  | 0  | 0  | 0         | 0                | -1      |
| AT5G35935 | 0  | 0  | 0 | -1 | 0  | 0  | 0  | -1        | 0                | -1      |
| AT5G35970 | 0  | -1 | 0 | -1 | 0  | 0  | -1 | 0         | 0                | -1      |
| AT5G36120 | 0  | -1 | 0 | 0  | 0  | 0  | 0  | 0         | 0                | -1      |
| AT5G36220 | 0  | 0  | 0 | -1 | 0  | 0  | 0  | 0         | 0                | -1      |
| AT5G36270 | 0  | -1 | 0 | 0  | 0  | 0  | 0  | 0         | 0                | -1      |
| AT5G36790 | 0  | -1 | 0 | 0  | 0  | 0  | -1 | 0         | 0                | -1      |
| AT5G36930 | 0  | 0  | 0 | -1 | 0  | 0  | 0  | 0         | 0                | -1      |
| AT5G37160 | -1 | 0  | 0 | 0  | 0  | 0  | 0  | 0         | 0                | -1      |
| AT5G37300 | 0  | 1  | 0 | 1  | 0  | 0  | 1  | 0         | 0                | 1       |
| AT5G37360 | 0  | 0  | 0 | 0  | 0  | 0  | -1 | 0         | 0                | -1      |
| AT5G37440 | 0  | 0  | 0 | -1 | 0  | 0  | 0  | 0         | 0                | -1      |
| AT5G37450 | 0  | 0  | 0 | -1 | 0  | 0  | 0  | 0         | 0                | -1      |
| AT5G37485 | 0  | 0  | 0 | -1 | 0  | 0  | 0  | 0         | 0                | -1      |
| AT5G37490 | 0  | 0  | 0 | -1 | 0  | 0  | 0  | 0         | 0                | -1      |
| AT5G37500 | 0  | 1  | 0 | 1  | 0  | 0  | 0  | 0         | 0                | 1       |
| AT5G37550 | 0  | 0  | 0 | 1  | 0  | 0  | 1  | 0         | 0                | 1       |
| AT5G37670 | 0  | 0  | 0 | 0  | -1 | 0  | 0  | 0         | 0                | -1      |
| AT5G37790 | 1  | 0  | 0 | 0  | 0  | 0  | 1  | 0         | 0                | 1       |
| AT5G37970 | 0  | 1  | 0 | 0  | 0  | 0  | 1  | 0         | 0                | 1       |
| AT5G38030 | 0  | -1 | 0 | -1 | 0  | 0  | 0  | 0         | 0                | -1      |
| AT5G38070 | 0  | -1 | 0 | 0  | 0  | 0  | 0  | 0         | 0                | -1      |
| AT5G38160 | 0  | 0  | 0 | -1 | 0  | 0  | 0  | 0         | 0                | -1      |
| AT5G38280 | 0  | 1  | 0 | 1  | 0  | 0  | 0  | 0         | 0                | 1       |
| AT5G38344 | 0  | 0  | 0 | -1 | 0  | 0  | 0  | 0         | 0                | -1      |
| AT5G38350 | 0  | 0  | 0 | -1 | 0  | 0  | 0  | 0         | 0                | -1      |
| AT5G38410 | 0  | 0  | 0 | 0  | 0  | -1 | 0  | 0         | 0                | -1      |
| AT5G38430 | 0  | -1 | 0 | 0  | 0  | -1 | 0  | 0         | -1               | -1      |
| AT5G38510 | 0  | 0  | 0 | 0  | 0  | 0  | -1 | 0         | 0                | -1      |





Appendix Table S2

| Name      | 1  | 2  | 3  | 4  | 5 | 6  | 7  | pif45_Col | pif45bes1D_bes1D | ALL_PIF |
|-----------|----|----|----|----|---|----|----|-----------|------------------|---------|
| AT5G43290 | 0  | 1  | 0  | 1  | 0 | 0  | 0  | 0         | 0                | 1       |
| AT5G43300 | 0  | 1  | 0  | 1  | 0 | 0  | 0  | 0         | 0                | 1       |
| AT5G43420 | 0  | -1 | 0  | -1 | 0 | 0  | 0  | 0         | 0                | -1      |
| AT5G43440 | 0  | -1 | 0  | -1 | 0 | 0  | 0  | 0         | 0                | -1      |
| AT5G43450 | 0  | 0  | 0  | -1 | 0 | 0  | 0  | 0         | 0                | -1      |
| AT5G43470 | 0  | -1 | 0  | -1 | 0 | 0  | 0  | -1        | 0                | -1      |
| AT5G43520 | 0  | 1  | 0  | 0  | 0 | 0  | 1  | 0         | 0                | 1       |
| AT5G43630 | 0  | -1 | 0  | -1 | 0 | 0  | 0  | 0         | 0                | -1      |
| AT5G43745 | 0  | 0  | 0  | 0  | 0 | 0  | -1 | 0         | 0                | -1      |
| AT5G43750 | 0  | 0  | 0  | 0  | 0 | 0  | -1 | 0         | 0                | -1      |
| AT5G43760 | 0  | 0  | 0  | 0  | 0 | 0  | -1 | 0         | 0                | -1      |
| AT5G43770 | 0  | 1  | 0  | 0  | 0 | 0  | 1  | 0         | 0                | 1       |
| AT5G44040 | 0  | -1 | 0  | 0  | 0 | 0  | 0  | 0         | 0                | -1      |
| AT5G44130 | 0  | 1  | 0  | 1  | 0 | 0  | 1  | 0         | 0                | 1       |
| AT5G44190 | 0  | 0  | 0  | -1 | 0 | -1 | -1 | 0         | 0                | -1      |
| AT5G44260 | 1  | 1  | 0  | 0  | 0 | 0  | 1  | 0         | 0                | 1       |
| AT5G44400 | 0  | -1 | 0  | 0  | 0 | 0  | 0  | 0         | 0                | -1      |
| AT5G44440 | 0  | 0  | 0  | 0  | 1 | 0  | 0  | 1         | 0                | 1       |
| AT5G44520 | 0  | 0  | 0  | 0  | 0 | 0  | -1 | 0         | 0                | -1      |
| AT5G44550 | 0  | -1 | 0  | 0  | 0 | 0  | 0  | 0         | 0                | -1      |
| AT5G44580 | 0  | 0  | 0  | -1 | 0 | 0  | -1 | 0         | 0                | -1      |
| AT5G44582 | 0  | 0  | 0  | -1 | 0 | 0  | 0  | 0         | 0                | -1      |
| AT5G44585 | 0  | 0  | 0  | -1 | 0 | 0  | 0  | 0         | 0                | -1      |
| AT5G44660 | 0  | 0  | 0  | 0  | 0 | 0  | -1 | 0         | 0                | -1      |
| AT5G44670 | 0  | 1  | 0  | 1  | 0 | 0  | 0  | 0         | 0                | 1       |
| AT5G44680 | 0  | 0  | 0  | -1 | 0 | 0  | -1 | 0         | 0                | -1      |
| AT5G44690 | 0  | 0  | 0  | -1 | 0 | 0  | 0  | 0         | 0                | -1      |
| AT5G44700 | 0  | 0  | 0  | 0  | 0 | 0  | -1 | 0         | 0                | -1      |
| AT5G44870 | 0  | 0  | 0  | 0  | 0 | 0  | -1 | 0         | 0                | -1      |
| AT5G44990 | 0  | 0  | 0  | -1 | 0 | 0  | 0  | -1        | 0                | -1      |
| AT5G45070 | 0  | 0  | 0  | -1 | 0 | 0  | 0  | 0         | 0                | -1      |
| AT5G45080 | 0  | 0  | 0  | -1 | 0 | 0  | 0  | 0         | 0                | -1      |
| AT5G45210 | 0  | 1  | 0  | 1  | 0 | 0  | 0  | 0         | 0                | 1       |
| AT5G45220 | 0  | 0  | 0  | -1 | 0 | 0  | 0  | 0         | 0                | -1      |
| AT5G45280 | 0  | 0  | 0  | 1  | 0 | 0  | 1  | 0         | 0                | 1       |
| AT5G45310 | 0  | 1  | 0  | 0  | 0 | 0  | 1  | 0         | 0                | 1       |
| AT5G45490 | 0  | 0  | 0  | -1 | 0 | 0  | 0  | 0         | 0                | -1      |
| AT5G45520 | 0  | 0  | 0  | -1 | 0 | 0  | 0  | 0         | 0                | -1      |
| AT5G45530 | 0  | -1 | 0  | -1 | 0 | 0  | 0  | 0         | 0                | -1      |
| AT5G45650 | 0  | -1 | 0  | 0  | 0 | 0  | -1 | 0         | 0                | -1      |
| AT5G45680 | -1 | 0  | 0  | 0  | 0 | 0  | 0  | 0         | 0                | -1      |
| AT5G45820 | 0  | 0  | 0  | 0  | 0 | 0  | -1 | 0         | 0                | -1      |
| AT5G45830 | 0  | 0  | 0  | -1 | 0 | 0  | 0  | 0         | -1               | -1      |
| AT5G45850 | 0  | -1 | 0  | 0  | 0 | 0  | 0  | 0         | 0                | -1      |
| AT5G45930 | 0  | -1 | 0  | 0  | 0 | -1 | -1 | 0         | 0                | -1      |
| AT5G46110 | 0  | -1 | 0  | 0  | 0 | 0  | -1 | 0         | 0                | -1      |
| AT5G46240 | 1  | 1  | 0  | 0  | 1 | 0  | 0  | 0         | 0                | 1       |
| AT5G46440 | 0  | 0  | 0  | -1 | 0 | 0  | 0  | 0         | 0                | -1      |
| AT5G46450 | 0  | 0  | 0  | -1 | 0 | 0  | -1 | 0         | 0                | -1      |
| AT5G46460 | 0  | 0  | 0  | -1 | 0 | 0  | 0  | 0         | 0                | -1      |
| AT5G46470 | 0  | 0  | 0  | -1 | 0 | 0  | 0  | 0         | 0                | -1      |
| AT5G46665 | 0  | 0  | 0  | -1 | 0 | 0  | 0  | 0         | 0                | -1      |
| AT5G46690 | 0  | -1 | 0  | -1 | 0 | -1 | -1 | 0         | 0                | -1      |
| AT5G46900 | 0  | 1  | 0  | 1  | 0 | 0  | 1  | 0         | 0                | 1       |
| AT5G47040 | 0  | 0  | 0  | 0  | 0 | 0  | -1 | 0         | 0                | -1      |
| AT5G47240 | 0  | 1  | 0  | 1  | 0 | 0  | 0  | 0         | 0                | 1       |
| AT5G47250 | 0  | 0  | 0  | -1 | 0 | 0  | 0  | 0         | 0                | -1      |
| AT5G47370 | 1  | 0  | 0  | 0  | 1 | 0  | 0  | 0         | 0                | 1       |
| AT5G47440 | 0  | 0  | -1 | 0  | 0 | 0  | 0  | 0         | 0                | -1      |
| AT5G47450 | 0  | 1  | 0  | 1  | 0 | 0  | 0  | 0         | 0                | 1       |
| AT5G47500 | 0  | -1 | 0  | 0  | 0 | 0  | -1 | 0         | 0                | -1      |

Appendix Table S2

| Name      | 1  | 2  | 3  | 4  | 5  | 6  | 7  | pif45_Col | pif45bes1D_bes1D | ALL_PIF |
|-----------|----|----|----|----|----|----|----|-----------|------------------|---------|
| AT5G47610 | -1 | -1 | 0  | 0  | 0  | 0  | -1 | 0         | 0                | -1      |
| AT5G47950 | 0  | 0  | 0  | -1 | 0  | 0  | 0  | 0         | 0                | -1      |
| AT5G48000 | 0  | -1 | 0  | -1 | 0  | 0  | -1 | 0         | 0                | -1      |
| AT5G48070 | 0  | -1 | 0  | 0  | 0  | 0  | 0  | 0         | 0                | -1      |
| AT5G48090 | 0  | 0  | 0  | -1 | 0  | 0  | 0  | 0         | 0                | -1      |
| AT5G48170 | 0  | 0  | 0  | -1 | 0  | 0  | 0  | 0         | 0                | -1      |
| AT5G48320 | 0  | -1 | 0  | 0  | 0  | 0  | 0  | 0         | 0                | -1      |
| AT5G48460 | 1  | 0  | 0  | 1  | 0  | 0  | 0  | 0         | 0                | 1       |
| AT5G48470 | 0  | 0  | 0  | -1 | 0  | 0  | 0  | 0         | 0                | -1      |
| AT5G48485 | 0  | -1 | 0  | -1 | 0  | 0  | -1 | 0         | 0                | -1      |
| AT5G48490 | 0  | 0  | -1 | -1 | 0  | -1 | -1 | -1        | -1               | -1      |
| AT5G48690 | 0  | -1 | 0  | 0  | 0  | 0  | 0  | 0         | 0                | -1      |
| AT5G48790 | 0  | 0  | 0  | 0  | 0  | 0  | -1 | 0         | 0                | -1      |
| AT5G48800 | 0  | 1  | 0  | 1  | 0  | 0  | 0  | 0         | 0                | 1       |
| AT5G48880 | 0  | -1 | 0  | 0  | -1 | 0  | 0  | 0         | 0                | -1      |
| AT5G48900 | 1  | 1  | 0  | 1  | 0  | 1  | 1  | 0         | 0                | 1       |
| AT5G48940 | 0  | 0  | 0  | -1 | 0  | 0  | 0  | 0         | 0                | -1      |
| AT5G49160 | 0  | 0  | -1 | 0  | 0  | 0  | -1 | 0         | 0                | -1      |
| AT5G49190 | 0  | 0  | 0  | -1 | 0  | 0  | 0  | 0         | 0                | -1      |
| AT5G49215 | 0  | 0  | 0  | -1 | 0  | 0  | 0  | 0         | 0                | -1      |
| AT5G49360 | -1 | 0  | 0  | 0  | 0  | 0  | 0  | 0         | 0                | -1      |
| AT5G49520 | 0  | 1  | 0  | 1  | 0  | 0  | 0  | 0         | 0                | 1       |
| AT5G49690 | 0  | 1  | 0  | 1  | 0  | 0  | 0  | 0         | 0                | 1       |
| AT5G50160 | 0  | -1 | 0  | 0  | 0  | 0  | 0  | 0         | 0                | -1      |
| AT5G50175 | 0  | 1  | 0  | 1  | 0  | 0  | 0  | 0         | 0                | 1       |
| AT5G50340 | 0  | 0  | 0  | 0  | 0  | 0  | -1 | 0         | 0                | -1      |
| AT5G50360 | 0  | -1 | 0  | 0  | 0  | 0  | 0  | 0         | 0                | -1      |
| AT5G50550 | 0  | 0  | 0  | -1 | 0  | 0  | 0  | 0         | 0                | -1      |
| AT5G50560 | 0  | 0  | 0  | -1 | 0  | 0  | 0  | 0         | 0                | -1      |
| AT5G50565 | 0  | 0  | 0  | -1 | 0  | 0  | 0  | 0         | 0                | -1      |
| AT5G50570 | 1  | 1  | 0  | 0  | 0  | 0  | 0  | 0         | 0                | 1       |
| AT5G50590 | 0  | 0  | 0  | -1 | 0  | 0  | 0  | 0         | 0                | -1      |
| AT5G50650 | 0  | 0  | 0  | -1 | 0  | 0  | 0  | 0         | 0                | -1      |
| AT5G50740 | 0  | -1 | 0  | 0  | 0  | 0  | -1 | 0         | 0                | -1      |
| AT5G50750 | 0  | 1  | 0  | 1  | 0  | 0  | 0  | 0         | 0                | 1       |
| AT5G50800 | 0  | -1 | 0  | 0  | 0  | 0  | 0  | 0         | 0                | -1      |
| AT5G51010 | 0  | 0  | 0  | 0  | 0  | 0  | -1 | 0         | 0                | -1      |
| AT5G51060 | 0  | 0  | 0  | 1  | 0  | 0  | 1  | 0         | 0                | 1       |
| AT5G51100 | 0  | 0  | -1 | -1 | 0  | 0  | 0  | 0         | 0                | -1      |
| AT5G51210 | 0  | 1  | 1  | 1  | 0  | 1  | 1  | 0         | 0                | 1       |
| AT5G51390 | 0  | 0  | 0  | 0  | 0  | 0  | -1 | 0         | 0                | -1      |
| AT5G51440 | 0  | -1 | 0  | 0  | -1 | 0  | 0  | 0         | 0                | -1      |
| AT5G51460 | 0  | 0  | 0  | 0  | 0  | 0  | -1 | 0         | 0                | -1      |
| AT5G51520 | 0  | -1 | 0  | 0  | 0  | 0  | 0  | 0         | 0                | -1      |
| AT5G51550 | 0  | 0  | 0  | 0  | 0  | 0  | -1 | 0         | 0                | -1      |
| AT5G51670 | 1  | 1  | 0  | 1  | 0  | 1  | 1  | 0         | 0                | 1       |
| AT5G51710 | -1 | 0  | 0  | 0  | 0  | 0  | 0  | 0         | 0                | -1      |
| AT5G51720 | 0  | 0  | 0  | 0  | 0  | 0  | -1 | 0         | 0                | -1      |
| AT5G51730 | 0  | 0  | 0  | -1 | 0  | 0  | 0  | 0         | 0                | -1      |
| AT5G51810 | 0  | 0  | 0  | 1  | 0  | 0  | 1  | 0         | 0                | 1       |
| AT5G51890 | 0  | 0  | 0  | 0  | 0  | 0  | -1 | 0         | 0                | -1      |
| AT5G52050 | 0  | -1 | 0  | 0  | 0  | 0  | 0  | 0         | 0                | -1      |
| AT5G52070 | -1 | 0  | 0  | 0  | 0  | 0  | 0  | 0         | 0                | -1      |
| AT5G52170 | 0  | -1 | 0  | 0  | 0  | 0  | 0  | 0         | 0                | -1      |
| AT5G52260 | 0  | -1 | 0  | 0  | 0  | 0  | 0  | 0         | 0                | -1      |
| AT5G52280 | 0  | 1  | 0  | 0  | 0  | 0  | 1  | 0         | 0                | 1       |
| AT5G52310 | 1  | 1  | 0  | 1  | 0  | 0  | 0  | 0         | 0                | 1       |
| AT5G52570 | 0  | 0  | 0  | 0  | 0  | 0  | -1 | 0         | 0                | -1      |
| AT5G52780 | 0  | 0  | 0  | 0  | 0  | 0  | -1 | 0         | 0                | -1      |
| AT5G52860 | 0  | -1 | 0  | -1 | 0  | 0  | 0  | 0         | 0                | -1      |
| AT5G52900 | 1  | 0  | 0  | 0  | 1  | 0  | 0  | 0         | 0                | 1       |



Appendix Table S2

| Name      | 1 | 2  | 3  | 4  | 5  | 6  | 7  | pif45_Col | pif45bes1D_bes1D | ALL_PIF |
|-----------|---|----|----|----|----|----|----|-----------|------------------|---------|
| AT5G57220 | 0 | 0  | 0  | -1 | 0  | 0  | 0  | -1        | 0                | -1      |
| AT5G57240 | 0 | 1  | 0  | 0  | 1  | 0  | 0  | 0         | 0                | 1       |
| AT5G57345 | 0 | -1 | -1 | 0  | 0  | 0  | -1 | 0         | 0                | -1      |
| AT5G57350 | 0 | 0  | 0  | -1 | 0  | 0  | 0  | 0         | 0                | -1      |
| AT5G57480 | 0 | 1  | 0  | 1  | 0  | 0  | 0  | 0         | 0                | 1       |
| AT5G57500 | 0 | -1 | 0  | 0  | 0  | 0  | 0  | 0         | 0                | -1      |
| AT5G57550 | 0 | 0  | 0  | 1  | 0  | 0  | 1  | 0         | 0                | 1       |
| AT5G57670 | 0 | 0  | 1  | 1  | 0  | 0  | 0  | 0         | 0                | 1       |
| AT5G57760 | 1 | 1  | 0  | 1  | 0  | 1  | 1  | 0         | 0                | 1       |
| AT5G57780 | 0 | 0  | 1  | 1  | 0  | 0  | 0  | 0         | 0                | 1       |
| AT5G57810 | 0 | 0  | 0  | 0  | 0  | -1 | 0  | 0         | 0                | -1      |
| AT5G57980 | 0 | -1 | 0  | 0  | 0  | 0  | 0  | 0         | 0                | -1      |
| AT5G58140 | 0 | 0  | 0  | 0  | 0  | 0  | -1 | 0         | 0                | -1      |
| AT5G58250 | 0 | 0  | -1 | 0  | 0  | 0  | 0  | 0         | 0                | -1      |
| AT5G58260 | 0 | 0  | 0  | 0  | 0  | 0  | -1 | 0         | 0                | -1      |
| AT5G58320 | 0 | 1  | 0  | 1  | 0  | 0  | 0  | 0         | 0                | 1       |
| AT5G58330 | 0 | 0  | 0  | 0  | 0  | 0  | -1 | 0         | 0                | -1      |
| AT5G58570 | 0 | 0  | 0  | -1 | 0  | 0  | 0  | 0         | 0                | -1      |
| AT5G58580 | 0 | -1 | 0  | 0  | 0  | 0  | 0  | 0         | 0                | -1      |
| AT5G58750 | 0 | 1  | 0  | 1  | 0  | 0  | 1  | 1         | 0                | 1       |
| AT5G58784 | 0 | -1 | 0  | 0  | 0  | 0  | 0  | 0         | 0                | -1      |
| AT5G58860 | 0 | -1 | 0  | 0  | 0  | 0  | 0  | 0         | 0                | -1      |
| AT5G59010 | 1 | 1  | 0  | 1  | 0  | 0  | 1  | 1         | 0                | 1       |
| AT5G59040 | 0 | 1  | 0  | 1  | 0  | 1  | 0  | 0         | 0                | 1       |
| AT5G59050 | 0 | 1  | 0  | 1  | 0  | 0  | 1  | 0         | 0                | 1       |
| AT5G59080 | 0 | 0  | 0  | 0  | 0  | 0  | -1 | 0         | 0                | -1      |
| AT5G59170 | 0 | 0  | 0  | -1 | 0  | 0  | 0  | 0         | 0                | -1      |
| AT5G59240 | 0 | -1 | 0  | 0  | 0  | 0  | 0  | 0         | 0                | -1      |
| AT5G59250 | 0 | 0  | 0  | 0  | 0  | 0  | -1 | 0         | 0                | -1      |
| AT5G59430 | 0 | 0  | 0  | 0  | 0  | 0  | -1 | 0         | 0                | -1      |
| AT5G59540 | 0 | 0  | 0  | 0  | 0  | 0  | -1 | 0         | 0                | -1      |
| AT5G59570 | 0 | 1  | 0  | 0  | 0  | 0  | 1  | 0         | 0                | 1       |
| AT5G59750 | 0 | 0  | 0  | 0  | 0  | 0  | -1 | 0         | 0                | -1      |
| AT5G59850 | 0 | -1 | 0  | 0  | 0  | 0  | 0  | 0         | 0                | -1      |
| AT5G60150 | 0 | -1 | 0  | 0  | 0  | 0  | 0  | 0         | 0                | -1      |
| AT5G60250 | 0 | -1 | 0  | -1 | 0  | 0  | 0  | 0         | 0                | -1      |
| AT5G60260 | 0 | 0  | 0  | -1 | 0  | 0  | 0  | 0         | 0                | -1      |
| AT5G60270 | 0 | 0  | 0  | -1 | 0  | 0  | 0  | 0         | 0                | -1      |
| AT5G60340 | 0 | 0  | 0  | -1 | 0  | 0  | 0  | 0         | 0                | -1      |
| AT5G60390 | 0 | 0  | 0  | 0  | 0  | -1 | 0  | 0         | 0                | -1      |
| AT5G60440 | 0 | 0  | 0  | -1 | 0  | 0  | 0  | 0         | 0                | -1      |
| AT5G60520 | 0 | -1 | 0  | 0  | 0  | 0  | 0  | 0         | 0                | -1      |
| AT5G60660 | 0 | 1  | 0  | 1  | 0  | 1  | 1  | 0         | 0                | 1       |
| AT5G60680 | 1 | 1  | 0  | 1  | 0  | 0  | 0  | 0         | 0                | 1       |
| AT5G60760 | 0 | 1  | 0  | 1  | 0  | 0  | 1  | 0         | 0                | 1       |
| AT5G60860 | 1 | 0  | 0  | 1  | 0  | 0  | 0  | 0         | 0                | 1       |
| AT5G60880 | 0 | -1 | 0  | 0  | 0  | 0  | 0  | 0         | 0                | -1      |
| AT5G60890 | 0 | 0  | 0  | 0  | 0  | 0  | -1 | 0         | 0                | -1      |
| AT5G60950 | 0 | 0  | 0  | -1 | 0  | 0  | 0  | 0         | 0                | -1      |
| AT5G61030 | 0 | -1 | 0  | 0  | 0  | 0  | 0  | 0         | 0                | -1      |
| AT5G61170 | 0 | -1 | 0  | 0  | 0  | 0  | 0  | 0         | 0                | -1      |
| AT5G61270 | 0 | -1 | 0  | -1 | 0  | 0  | 0  | -1        | 0                | -1      |
| AT5G61330 | 0 | 0  | 0  | -1 | 0  | 0  | 0  | 0         | 0                | -1      |
| AT5G61340 | 0 | 0  | 0  | 1  | 0  | 0  | 1  | 0         | 0                | 1       |
| AT5G61410 | 0 | 0  | 0  | 0  | 0  | 0  | -1 | 0         | 0                | -1      |
| AT5G61420 | 0 | -1 | 0  | -1 | 0  | 0  | 0  | 0         | 0                | -1      |
| AT5G61455 | 0 | 0  | 0  | -1 | 0  | 0  | 0  | 0         | 0                | -1      |
| AT5G61520 | 0 | -1 | 0  | 0  | 0  | 0  | -1 | 0         | 0                | -1      |
| AT5G61590 | 0 | 0  | 0  | 0  | 0  | 0  | -1 | 0         | 0                | -1      |
| AT5G62070 | 1 | 0  | 0  | 0  | 0  | 0  | 1  | 0         | 0                | 1       |
| AT5G62210 | 0 | 0  | 0  | 0  | -1 | 0  | 0  | 0         | 0                | -1      |

Appendix Table S2

| Name      | 1  | 2  | 3  | 4  | 5  | 6  | 7  | pif45_Col | pif45bes1D_bes1D | ALL_PIF |
|-----------|----|----|----|----|----|----|----|-----------|------------------|---------|
| AT5G62280 | 1  | 0  | 0  | 0  | 1  | 0  | 0  | 0         | 0                | 1       |
| AT5G62330 | 0  | -1 | 0  | 0  | 0  | 0  | 0  | 0         | 0                | -1      |
| AT5G62350 | 0  | 0  | 0  | 0  | 0  | 0  | -1 | 0         | 0                | -1      |
| AT5G62360 | 0  | -1 | 0  | 0  | 0  | 0  | 0  | -1        | 0                | -1      |
| AT5G62430 | 0  | 0  | 0  | 0  | 0  | 0  | -1 | 0         | 0                | -1      |
| AT5G62440 | 0  | -1 | 0  | 0  | 0  | 0  | 0  | 0         | 0                | -1      |
| AT5G62580 | 1  | 0  | 0  | 1  | 0  | 0  | 0  | 0         | 0                | 1       |
| AT5G62630 | -1 | -1 | 0  | 0  | 0  | 0  | -1 | 0         | 0                | -1      |
| AT5G62680 | 0  | 0  | 0  | 0  | 0  | 0  | -1 | 0         | 0                | -1      |
| AT5G62710 | 0  | -1 | 0  | 0  | 0  | 0  | 0  | 0         | 0                | -1      |
| AT5G62720 | 0  | -1 | 0  | 0  | 0  | 0  | 0  | 0         | 0                | -1      |
| AT5G62800 | 0  | 1  | 0  | 0  | 0  | 0  | 1  | 0         | 0                | 1       |
| AT5G62900 | 0  | 0  | 0  | -1 | 0  | 0  | 0  | 0         | 0                | -1      |
| AT5G62920 | 0  | 0  | 0  | -1 | 0  | 0  | 0  | 0         | 0                | -1      |
| AT5G62990 | 0  | 0  | 0  | -1 | 0  | 0  | 0  | 0         | 0                | -1      |
| AT5G63250 | 0  | 0  | 0  | -1 | 0  | 0  | 0  | 0         | 0                | -1      |
| AT5G63595 | 0  | 1  | 0  | 1  | 0  | 0  | 0  | 0         | 0                | 1       |
| AT5G63650 | 1  | 1  | 1  | 1  | 1  | 1  | 1  | 0         | 0                | 1       |
| AT5G63800 | 0  | 0  | 0  | 1  | 0  | 0  | 1  | 0         | 0                | 1       |
| AT5G63850 | 0  | -1 | 0  | -1 | 0  | 0  | 0  | 0         | 0                | -1      |
| AT5G64040 | 0  | -1 | -1 | 0  | 0  | -1 | -1 | -1        | 0                | -1      |
| AT5G64060 | 0  | -1 | 0  | 0  | 0  | 0  | 0  | 0         | 0                | -1      |
| AT5G64080 | 0  | -1 | 0  | 0  | 0  | 0  | 0  | 0         | 0                | -1      |
| AT5G64260 | 0  | 0  | 0  | 1  | 0  | 0  | 1  | 0         | 0                | 1       |
| AT5G64300 | 0  | 1  | 0  | 0  | 0  | 0  | 1  | 0         | 0                | 1       |
| AT5G64310 | 1  | 0  | 0  | 1  | 0  | 0  | 0  | 0         | 0                | 1       |
| AT5G64460 | 0  | 0  | 0  | 0  | 0  | 0  | -1 | 0         | 0                | -1      |
| AT5G64530 | 0  | -1 | 0  | 0  | 0  | 0  | 0  | 0         | 0                | -1      |
| AT5G64570 | 0  | 0  | 0  | 0  | 0  | 0  | -1 | 0         | 0                | -1      |
| AT5G64620 | 0  | -1 | 0  | 0  | 0  | 0  | 0  | 0         | 0                | -1      |
| AT5G64685 | 0  | 0  | 0  | -1 | 0  | 0  | 0  | 0         | 0                | -1      |
| AT5G64770 | 0  | -1 | 0  | -1 | 0  | -1 | -1 | -1        | -1               | -1      |
| AT5G64780 | 0  | 0  | 0  | 0  | 0  | 0  | 0  | 0         | -1               | -1      |
| AT5G64840 | 0  | 0  | 0  | 0  | 0  | 0  | -1 | 0         | 0                | -1      |
| AT5G64850 | 0  | -1 | 0  | -1 | 0  | 0  | -1 | 0         | 0                | -1      |
| AT5G64905 | 0  | 0  | 0  | -1 | 0  | 0  | 0  | -1        | 0                | -1      |
| AT5G64940 | 0  | 0  | -1 | 0  | 0  | 0  | -1 | 0         | 0                | -1      |
| AT5G65010 | 0  | -1 | 0  | -1 | 0  | -1 | -1 | 0         | 0                | -1      |
| AT5G65030 | 0  | -1 | 0  | -1 | 0  | 0  | 0  | 0         | 0                | -1      |
| AT5G65140 | 0  | 1  | 0  | 1  | 0  | 0  | 0  | 0         | 0                | 1       |
| AT5G65220 | 0  | 0  | 0  | 0  | 0  | 0  | -1 | 0         | 0                | -1      |
| AT5G65280 | 0  | -1 | 0  | -1 | 0  | 0  | 0  | 0         | 0                | -1      |
| AT5G65310 | 0  | 0  | 0  | 0  | 0  | 0  | -1 | 0         | 0                | -1      |
| AT5G65390 | 1  | 0  | 0  | 0  | 0  | 0  | 1  | 0         | 0                | 1       |
| AT5G65600 | 0  | 0  | 0  | -1 | 0  | 0  | 0  | -1        | 0                | -1      |
| AT5G65730 | 0  | -1 | 0  | -1 | -1 | 0  | -1 | 0         | 0                | -1      |
| AT5G65790 | 0  | 1  | 0  | 1  | 0  | 0  | 0  | 0         | 0                | 1       |
| AT5G65800 | 0  | 1  | 0  | 1  | 0  | 1  | 1  | 0         | 0                | 1       |
| AT5G65850 | 0  | -1 | 0  | 0  | 0  | 0  | 0  | 0         | 0                | -1      |
| AT5G65890 | 0  | 0  | 0  | 0  | 0  | 0  | -1 | 0         | 0                | -1      |
| AT5G66080 | 1  | 1  | 0  | 1  | 0  | 0  | 1  | 0         | 0                | 1       |
| AT5G66190 | 0  | 0  | 0  | 0  | 0  | 0  | -1 | 0         | 0                | -1      |
| AT5G66210 | 0  | 1  | 0  | 1  | 0  | 0  | 0  | 0         | 0                | 1       |
| AT5G66270 | 0  | -1 | 0  | 0  | 0  | 0  | 0  | 0         | 0                | -1      |
| AT5G66280 | 0  | 0  | 0  | 1  | 0  | 0  | 1  | 0         | 0                | 1       |
| AT5G66350 | 0  | 0  | 0  | -1 | 0  | 0  | 0  | 0         | 0                | -1      |
| AT5G66390 | 0  | 0  | 0  | 1  | 0  | 0  | 1  | 0         | 0                | 1       |
| AT5G66400 | 1  | 1  | 0  | 0  | 0  | 0  | 1  | 0         | 0                | 1       |
| AT5G66570 | 0  | -1 | 0  | 0  | 0  | -1 | -1 | 0         | 0                | -1      |
| AT5G66590 | 1  | 1  | 1  | 1  | 0  | 1  | 1  | 1         | 0                | 1       |
| AT5G66650 | 0  | 1  | 0  | 1  | 0  | 1  | 0  | 0         | 0                | 1       |



Appendix Table S3

**Appendix Table S3.** BES1 and BZR1 targets, compiled from CHIP-CHIP and CHIP-seq experiments.

| <b>Name</b> | <b>BES_target</b> | <b>BZR1_target</b> | <b>BESBZR_target</b> |
|-------------|-------------------|--------------------|----------------------|
| AT1G01060   | 1                 | 0                  | 1                    |
| AT1G01110   | 0                 | 1                  | 1                    |
| AT1G01120   | 0                 | 1                  | 1                    |
| AT1G01130   | 0                 | 1                  | 1                    |
| AT1G01190   | 1                 | 0                  | 1                    |
| AT1G01250   | 0                 | 1                  | 1                    |
| AT1G01260   | 1                 | 1                  | 1                    |
| AT1G01290   | 0                 | 1                  | 1                    |
| AT1G01300   | 0                 | 1                  | 1                    |
| AT1G01310   | 1                 | 1                  | 1                    |
| AT1G01420   | 1                 | 1                  | 1                    |
| AT1G01430   | 0                 | 1                  | 1                    |
| AT1G01440   | 0                 | 1                  | 1                    |
| AT1G01460   | 0                 | 1                  | 1                    |
| AT1G01470   | 1                 | 1                  | 1                    |
| AT1G01480   | 1                 | 1                  | 1                    |
| AT1G01490   | 0                 | 1                  | 1                    |
| AT1G01500   | 0                 | 1                  | 1                    |
| AT1G01520   | 1                 | 0                  | 1                    |
| AT1G01540   | 1                 | 1                  | 1                    |
| AT1G01550   | 0                 | 1                  | 1                    |
| AT1G01560   | 0                 | 1                  | 1                    |
| AT1G01570   | 1                 | 1                  | 1                    |
| AT1G01580   | 1                 | 1                  | 1                    |
| AT1G01650   | 1                 | 1                  | 1                    |
| AT1G01660   | 0                 | 1                  | 1                    |
| AT1G01710   | 0                 | 1                  | 1                    |
| AT1G01720   | 1                 | 1                  | 1                    |
| AT1G01725   | 0                 | 1                  | 1                    |
| AT1G01900   | 1                 | 0                  | 1                    |
| AT1G01910   | 1                 | 0                  | 1                    |
| AT1G02065   | 1                 | 1                  | 1                    |
| AT1G02070   | 0                 | 1                  | 1                    |
| AT1G02228   | 0                 | 1                  | 1                    |
| AT1G02230   | 0                 | 1                  | 1                    |
| AT1G02250   | 0                 | 1                  | 1                    |
| AT1G02340   | 0                 | 1                  | 1                    |
| AT1G02350   | 1                 | 1                  | 1                    |
| AT1G02360   | 0                 | 1                  | 1                    |
| AT1G02390   | 0                 | 1                  | 1                    |
| AT1G02400   | 1                 | 1                  | 1                    |
| AT1G02405   | 0                 | 1                  | 1                    |
| AT1G02630   | 0                 | 1                  | 1                    |
| AT1G02640   | 1                 | 1                  | 1                    |
| AT1G02650   | 0                 | 1                  | 1                    |
| AT1G02660   | 0                 | 1                  | 1                    |
| AT1G02670   | 1                 | 1                  | 1                    |
| AT1G02730   | 1                 | 0                  | 1                    |
| AT1G03030   | 1                 | 0                  | 1                    |

Appendix Table S3

| Name      | BES_target | BZR1_target | BESBZR_target |
|-----------|------------|-------------|---------------|
| AT1G03060 | 1          | 0           | 1             |
| AT1G03120 | 0          | 1           | 1             |
| AT1G03130 | 0          | 1           | 1             |
| AT1G03140 | 0          | 1           | 1             |
| AT1G03210 | 0          | 1           | 1             |
| AT1G03220 | 0          | 1           | 1             |
| AT1G03310 | 1          | 0           | 1             |
| AT1G03590 | 0          | 1           | 1             |
| AT1G03600 | 1          | 1           | 1             |
| AT1G03610 | 1          | 1           | 1             |
| AT1G03790 | 0          | 1           | 1             |
| AT1G03800 | 1          | 1           | 1             |
| AT1G03810 | 0          | 1           | 1             |
| AT1G03840 | 0          | 1           | 1             |
| AT1G03850 | 0          | 1           | 1             |
| AT1G03870 | 0          | 1           | 1             |
| AT1G03880 | 0          | 1           | 1             |
| AT1G04120 | 0          | 1           | 1             |
| AT1G04130 | 0          | 1           | 1             |
| AT1G04150 | 0          | 1           | 1             |
| AT1G04160 | 0          | 1           | 1             |
| AT1G04240 | 0          | 1           | 1             |
| AT1G04250 | 0          | 1           | 1             |
| AT1G04360 | 0          | 1           | 1             |
| AT1G04370 | 0          | 1           | 1             |
| AT1G04420 | 0          | 1           | 1             |
| AT1G04430 | 0          | 1           | 1             |
| AT1G04530 | 1          | 1           | 1             |
| AT1G04540 | 1          | 1           | 1             |
| AT1G04650 | 1          | 0           | 1             |
| AT1G04670 | 0          | 1           | 1             |
| AT1G04680 | 0          | 1           | 1             |
| AT1G04690 | 0          | 1           | 1             |
| AT1G04970 | 0          | 1           | 1             |
| AT1G05000 | 0          | 1           | 1             |
| AT1G05010 | 0          | 1           | 1             |
| AT1G05020 | 0          | 1           | 1             |
| AT1G05060 | 1          | 0           | 1             |
| AT1G05090 | 1          | 0           | 1             |
| AT1G05340 | 0          | 1           | 1             |
| AT1G05350 | 0          | 1           | 1             |
| AT1G05410 | 1          | 1           | 1             |
| AT1G05420 | 0          | 1           | 1             |
| AT1G05530 | 1          | 0           | 1             |
| AT1G05570 | 0          | 1           | 1             |
| AT1G05575 | 0          | 1           | 1             |
| AT1G05690 | 0          | 1           | 1             |
| AT1G05700 | 1          | 1           | 1             |
| AT1G05710 | 1          | 1           | 1             |
| AT1G05800 | 0          | 1           | 1             |
| AT1G05805 | 0          | 1           | 1             |



Appendix Table S3

| Name      | BES_target | BZR1_target | BESBZR_target |
|-----------|------------|-------------|---------------|
| AT1G05810 | 0          | 1           | 1             |
| AT1G05870 | 0          | 1           | 1             |
| AT1G05880 | 0          | 1           | 1             |
| AT1G06148 | 0          | 1           | 1             |
| AT1G06150 | 1          | 0           | 1             |
| AT1G06160 | 0          | 1           | 1             |
| AT1G06520 | 0          | 1           | 1             |
| AT1G06530 | 0          | 1           | 1             |
| AT1G06640 | 1          | 0           | 1             |
| AT1G06645 | 1          | 0           | 1             |
| AT1G06670 | 1          | 0           | 1             |
| AT1G06920 | 0          | 1           | 1             |
| AT1G06923 | 1          | 1           | 1             |
| AT1G07040 | 1          | 1           | 1             |
| AT1G07050 | 1          | 1           | 1             |
| AT1G07060 | 0          | 1           | 1             |
| AT1G07080 | 0          | 1           | 1             |
| AT1G07090 | 1          | 1           | 1             |
| AT1G07100 | 0          | 1           | 1             |
| AT1G07130 | 0          | 1           | 1             |
| AT1G07135 | 0          | 1           | 1             |
| AT1G07150 | 0          | 1           | 1             |
| AT1G07160 | 0          | 1           | 1             |
| AT1G07200 | 0          | 1           | 1             |
| AT1G07210 | 0          | 1           | 1             |
| AT1G07240 | 1          | 0           | 1             |
| AT1G07270 | 0          | 1           | 1             |
| AT1G07280 | 1          | 1           | 1             |
| AT1G07290 | 0          | 1           | 1             |
| AT1G07420 | 0          | 1           | 1             |
| AT1G07430 | 1          | 1           | 1             |
| AT1G07440 | 0          | 1           | 1             |
| AT1G07570 | 0          | 1           | 1             |
| AT1G07580 | 0          | 1           | 1             |
| AT1G07620 | 0          | 1           | 1             |
| AT1G07630 | 0          | 1           | 1             |
| AT1G07720 | 1          | 0           | 1             |
| AT1G07880 | 0          | 1           | 1             |
| AT1G07890 | 1          | 1           | 1             |
| AT1G07900 | 0          | 1           | 1             |
| AT1G08500 | 0          | 1           | 1             |
| AT1G08510 | 0          | 1           | 1             |
| AT1G08630 | 1          | 0           | 1             |
| AT1G08650 | 0          | 1           | 1             |
| AT1G08660 | 0          | 1           | 1             |
| AT1G08920 | 1          | 0           | 1             |
| AT1G09060 | 0          | 1           | 1             |
| AT1G09070 | 0          | 1           | 1             |
| AT1G09080 | 0          | 1           | 1             |
| AT1G09230 | 0          | 1           | 1             |
| AT1G09240 | 0          | 1           | 1             |

Appendix Table S3

| Name      | BES_target | BZR1_target | BESBZR_target |
|-----------|------------|-------------|---------------|
| AT1G09250 | 1          | 1           | 1             |
| AT1G09260 | 1          | 1           | 1             |
| AT1G09340 | 0          | 1           | 1             |
| AT1G09350 | 1          | 1           | 1             |
| AT1G09380 | 0          | 1           | 1             |
| AT1G09390 | 1          | 1           | 1             |
| AT1G09520 | 0          | 1           | 1             |
| AT1G09530 | 0          | 1           | 1             |
| AT1G09935 | 0          | 1           | 1             |
| AT1G09940 | 0          | 1           | 1             |
| AT1G09950 | 0          | 1           | 1             |
| AT1G09960 | 0          | 1           | 1             |
| AT1G09970 | 0          | 1           | 1             |
| AT1G10060 | 0          | 1           | 1             |
| AT1G10070 | 0          | 1           | 1             |
| AT1G10090 | 1          | 0           | 1             |
| AT1G10130 | 1          | 0           | 1             |
| AT1G10140 | 0          | 1           | 1             |
| AT1G10150 | 0          | 1           | 1             |
| AT1G10270 | 1          | 0           | 1             |
| AT1G10370 | 0          | 1           | 1             |
| AT1G10380 | 0          | 1           | 1             |
| AT1G10410 | 0          | 1           | 1             |
| AT1G10417 | 0          | 1           | 1             |
| AT1G10460 | 1          | 0           | 1             |
| AT1G10470 | 0          | 1           | 1             |
| AT1G10480 | 0          | 1           | 1             |
| AT1G10550 | 0          | 1           | 1             |
| AT1G10560 | 0          | 1           | 1             |
| AT1G10585 | 0          | 1           | 1             |
| AT1G10588 | 0          | 1           | 1             |
| AT1G10640 | 1          | 0           | 1             |
| AT1G10760 | 1          | 0           | 1             |
| AT1G10910 | 1          | 0           | 1             |
| AT1G10950 | 0          | 1           | 1             |
| AT1G10960 | 0          | 1           | 1             |
| AT1G11040 | 0          | 1           | 1             |
| AT1G11050 | 0          | 1           | 1             |
| AT1G11210 | 0          | 1           | 1             |
| AT1G11220 | 0          | 1           | 1             |
| AT1G11250 | 0          | 1           | 1             |
| AT1G11260 | 0          | 1           | 1             |
| AT1G11270 | 0          | 1           | 1             |
| AT1G11300 | 0          | 1           | 1             |
| AT1G11310 | 0          | 1           | 1             |
| AT1G11320 | 0          | 1           | 1             |
| AT1G11330 | 0          | 1           | 1             |
| AT1G11370 | 0          | 1           | 1             |
| AT1G11380 | 0          | 1           | 1             |
| AT1G11630 | 1          | 0           | 1             |
| AT1G11940 | 1          | 0           | 1             |

Appendix Table S3

| Name      | BES_target | BZR1_target | BESBZR_target |
|-----------|------------|-------------|---------------|
| AT1G12030 | 0          | 1           | 1             |
| AT1G12100 | 0          | 1           | 1             |
| AT1G12110 | 0          | 1           | 1             |
| AT1G12244 | 1          | 0           | 1             |
| AT1G12250 | 1          | 0           | 1             |
| AT1G12310 | 0          | 1           | 1             |
| AT1G12320 | 0          | 1           | 1             |
| AT1G12370 | 1          | 0           | 1             |
| AT1G12420 | 1          | 1           | 1             |
| AT1G12430 | 1          | 1           | 1             |
| AT1G12440 | 0          | 1           | 1             |
| AT1G12450 | 0          | 1           | 1             |
| AT1G12500 | 0          | 1           | 1             |
| AT1G12510 | 0          | 1           | 1             |
| AT1G12610 | 0          | 1           | 1             |
| AT1G12620 | 0          | 1           | 1             |
| AT1G12840 | 1          | 0           | 1             |
| AT1G12935 | 1          | 0           | 1             |
| AT1G13070 | 0          | 1           | 1             |
| AT1G13080 | 0          | 1           | 1             |
| AT1G13240 | 0          | 1           | 1             |
| AT1G13245 | 0          | 1           | 1             |
| AT1G13250 | 1          | 1           | 1             |
| AT1G13260 | 0          | 1           | 1             |
| AT1G13360 | 0          | 1           | 1             |
| AT1G13370 | 0          | 1           | 1             |
| AT1G13550 | 0          | 1           | 1             |
| AT1G13560 | 1          | 1           | 1             |
| AT1G13570 | 0          | 1           | 1             |
| AT1G13630 | 1          | 0           | 1             |
| AT1G13940 | 0          | 1           | 1             |
| AT1G13950 | 1          | 1           | 1             |
| AT1G14000 | 1          | 0           | 1             |
| AT1G14010 | 1          | 0           | 1             |
| AT1G14270 | 0          | 1           | 1             |
| AT1G14280 | 0          | 1           | 1             |
| AT1G14290 | 0          | 1           | 1             |
| AT1G14330 | 0          | 1           | 1             |
| AT1G14340 | 0          | 1           | 1             |
| AT1G14430 | 1          | 0           | 1             |
| AT1G14530 | 0          | 1           | 1             |
| AT1G14590 | 0          | 1           | 1             |
| AT1G14600 | 0          | 1           | 1             |
| AT1G14610 | 0          | 1           | 1             |
| AT1G14685 | 1          | 0           | 1             |
| AT1G14770 | 0          | 1           | 1             |
| AT1G14780 | 0          | 1           | 1             |
| AT1G14790 | 1          | 0           | 1             |
| AT1G14800 | 1          | 0           | 1             |
| AT1G14880 | 1          | 0           | 1             |
| AT1G14890 | 0          | 1           | 1             |

Appendix Table S3

| Name      | BES_target | BZR1_target | BESBZR_target |
|-----------|------------|-------------|---------------|
| AT1G14900 | 0          | 1           | 1             |
| AT1G14910 | 0          | 1           | 1             |
| AT1G14920 | 1          | 1           | 1             |
| AT1G14930 | 0          | 1           | 1             |
| AT1G15000 | 0          | 1           | 1             |
| AT1G15010 | 0          | 1           | 1             |
| AT1G15110 | 1          | 0           | 1             |
| AT1G15120 | 0          | 1           | 1             |
| AT1G15125 | 0          | 1           | 1             |
| AT1G15130 | 1          | 0           | 1             |
| AT1G15220 | 1          | 0           | 1             |
| AT1G15250 | 1          | 0           | 1             |
| AT1G15260 | 1          | 0           | 1             |
| AT1G15350 | 0          | 1           | 1             |
| AT1G15360 | 0          | 1           | 1             |
| AT1G15660 | 0          | 1           | 1             |
| AT1G15670 | 1          | 1           | 1             |
| AT1G15720 | 1          | 0           | 1             |
| AT1G15750 | 1          | 1           | 1             |
| AT1G15757 | 0          | 1           | 1             |
| AT1G15800 | 1          | 0           | 1             |
| AT1G15810 | 1          | 0           | 1             |
| AT1G16090 | 1          | 0           | 1             |
| AT1G16130 | 1          | 0           | 1             |
| AT1G16140 | 0          | 1           | 1             |
| AT1G16150 | 0          | 1           | 1             |
| AT1G16340 | 0          | 1           | 1             |
| AT1G16350 | 0          | 1           | 1             |
| AT1G16360 | 0          | 1           | 1             |
| AT1G16500 | 0          | 1           | 1             |
| AT1G16510 | 0          | 1           | 1             |
| AT1G16520 | 1          | 0           | 1             |
| AT1G16760 | 1          | 0           | 1             |
| AT1G16850 | 1          | 0           | 1             |
| AT1G17220 | 0          | 1           | 1             |
| AT1G17230 | 0          | 1           | 1             |
| AT1G17260 | 1          | 0           | 1             |
| AT1G17285 | 0          | 1           | 1             |
| AT1G17290 | 0          | 1           | 1             |
| AT1G17300 | 0          | 1           | 1             |
| AT1G17360 | 0          | 1           | 1             |
| AT1G17370 | 0          | 1           | 1             |
| AT1G17380 | 1          | 1           | 1             |
| AT1G17410 | 0          | 1           | 1             |
| AT1G17420 | 0          | 1           | 1             |
| AT1G17430 | 0          | 1           | 1             |
| AT1G17495 | 0          | 1           | 1             |
| AT1G17500 | 0          | 1           | 1             |
| AT1G17610 | 1          | 0           | 1             |
| AT1G17840 | 1          | 0           | 1             |
| AT1G17940 | 0          | 1           | 1             |

Appendix Table S3

| Name      | BES_target | BZR1_target | BESBZR_target |
|-----------|------------|-------------|---------------|
| AT1G17950 | 0          | 1           | 1             |
| AT1G17980 | 0          | 1           | 1             |
| AT1G17990 | 1          | 1           | 1             |
| AT1G18000 | 0          | 1           | 1             |
| AT1G18080 | 1          | 0           | 1             |
| AT1G18200 | 0          | 1           | 1             |
| AT1G18210 | 0          | 1           | 1             |
| AT1G18290 | 0          | 1           | 1             |
| AT1G18300 | 0          | 1           | 1             |
| AT1G18310 | 0          | 1           | 1             |
| AT1G18400 | 0          | 1           | 1             |
| AT1G18410 | 0          | 1           | 1             |
| AT1G18550 | 0          | 1           | 1             |
| AT1G18560 | 0          | 1           | 1             |
| AT1G18570 | 1          | 1           | 1             |
| AT1G18670 | 1          | 0           | 1             |
| AT1G18700 | 0          | 1           | 1             |
| AT1G18710 | 0          | 1           | 1             |
| AT1G18720 | 0          | 1           | 1             |
| AT1G18730 | 0          | 1           | 1             |
| AT1G18735 | 0          | 1           | 1             |
| AT1G18740 | 0          | 1           | 1             |
| AT1G18750 | 0          | 1           | 1             |
| AT1G18860 | 0          | 1           | 1             |
| AT1G18870 | 0          | 1           | 1             |
| AT1G19110 | 1          | 0           | 1             |
| AT1G19170 | 0          | 1           | 1             |
| AT1G19180 | 1          | 1           | 1             |
| AT1G19190 | 0          | 1           | 1             |
| AT1G19200 | 0          | 1           | 1             |
| AT1G19210 | 0          | 1           | 1             |
| AT1G19220 | 0          | 1           | 1             |
| AT1G19300 | 0          | 1           | 1             |
| AT1G19310 | 1          | 1           | 1             |
| AT1G19320 | 0          | 1           | 1             |
| AT1G19340 | 0          | 1           | 1             |
| AT1G19350 | 1          | 1           | 1             |
| AT1G19460 | 1          | 0           | 1             |
| AT1G19490 | 1          | 0           | 1             |
| AT1G19660 | 0          | 1           | 1             |
| AT1G19670 | 0          | 1           | 1             |
| AT1G19770 | 1          | 0           | 1             |
| AT1G19835 | 1          | 1           | 1             |
| AT1G19840 | 0          | 1           | 1             |
| AT1G19850 | 1          | 0           | 1             |
| AT1G19870 | 1          | 0           | 1             |
| AT1G19930 | 0          | 1           | 1             |
| AT1G19940 | 0          | 1           | 1             |
| AT1G19950 | 0          | 1           | 1             |
| AT1G20000 | 0          | 1           | 1             |
| AT1G20010 | 1          | 1           | 1             |

Appendix Table S3

| <b>Name</b> | <b>BES_target</b> | <b>BZR1_target</b> | <b>BESBZR_target</b> |
|-------------|-------------------|--------------------|----------------------|
| AT1G20015   | 0                 | 1                  | 1                    |
| AT1G20070   | 1                 | 0                  | 1                    |
| AT1G20160   | 1                 | 0                  | 1                    |
| AT1G20300   | 0                 | 1                  | 1                    |
| AT1G20310   | 0                 | 1                  | 1                    |
| AT1G20320   | 1                 | 1                  | 1                    |
| AT1G20330   | 0                 | 1                  | 1                    |
| AT1G20890   | 0                 | 1                  | 1                    |
| AT1G20900   | 1                 | 1                  | 1                    |
| AT1G20960   | 0                 | 1                  | 1                    |
| AT1G20970   | 0                 | 1                  | 1                    |
| AT1G20980   | 1                 | 1                  | 1                    |
| AT1G20990   | 0                 | 1                  | 1                    |
| AT1G21000   | 0                 | 1                  | 1                    |
| AT1G21010   | 1                 | 1                  | 1                    |
| AT1G21020   | 0                 | 1                  | 1                    |
| AT1G21050   | 0                 | 1                  | 1                    |
| AT1G21060   | 0                 | 1                  | 1                    |
| AT1G21070   | 1                 | 0                  | 1                    |
| AT1G21100   | 0                 | 1                  | 1                    |
| AT1G21110   | 0                 | 1                  | 1                    |
| AT1G21260   | 0                 | 1                  | 1                    |
| AT1G21270   | 0                 | 1                  | 1                    |
| AT1G21380   | 0                 | 1                  | 1                    |
| AT1G21390   | 0                 | 1                  | 1                    |
| AT1G21395   | 0                 | 1                  | 1                    |
| AT1G21400   | 1                 | 1                  | 1                    |
| AT1G21410   | 0                 | 1                  | 1                    |
| AT1G21510   | 0                 | 1                  | 1                    |
| AT1G21520   | 0                 | 1                  | 1                    |
| AT1G21525   | 0                 | 1                  | 1                    |
| AT1G21590   | 1                 | 1                  | 1                    |
| AT1G21600   | 0                 | 1                  | 1                    |
| AT1G21640   | 1                 | 0                  | 1                    |
| AT1G21700   | 1                 | 0                  | 1                    |
| AT1G21810   | 0                 | 1                  | 1                    |
| AT1G21830   | 0                 | 1                  | 1                    |
| AT1G21835   | 0                 | 1                  | 1                    |
| AT1G21900   | 0                 | 1                  | 1                    |
| AT1G21910   | 1                 | 1                  | 1                    |
| AT1G21973   | 1                 | 1                  | 1                    |
| AT1G21980   | 0                 | 1                  | 1                    |
| AT1G22180   | 0                 | 1                  | 1                    |
| AT1G22190   | 1                 | 1                  | 1                    |
| AT1G22330   | 0                 | 1                  | 1                    |
| AT1G22335   | 1                 | 1                  | 1                    |
| AT1G22350   | 0                 | 1                  | 1                    |
| AT1G22360   | 0                 | 1                  | 1                    |
| AT1G22370   | 1                 | 1                  | 1                    |
| AT1G22380   | 0                 | 1                  | 1                    |
| AT1G22400   | 0                 | 1                  | 1                    |

Appendix Table S3

| Name      | BES_target | BZR1_target | BESBZR_target |
|-----------|------------|-------------|---------------|
| AT1G22410 | 0          | 1           | 1             |
| AT1G22560 | 0          | 1           | 1             |
| AT1G22570 | 0          | 1           | 1             |
| AT1G22580 | 0          | 1           | 1             |
| AT1G22650 | 0          | 1           | 1             |
| AT1G22660 | 0          | 1           | 1             |
| AT1G22770 | 1          | 0           | 1             |
| AT1G22810 | 1          | 1           | 1             |
| AT1G22830 | 1          | 1           | 1             |
| AT1G22900 | 0          | 1           | 1             |
| AT1G22910 | 0          | 1           | 1             |
| AT1G23000 | 1          | 0           | 1             |
| AT1G23020 | 0          | 1           | 1             |
| AT1G23030 | 0          | 1           | 1             |
| AT1G23070 | 0          | 1           | 1             |
| AT1G23080 | 1          | 1           | 1             |
| AT1G23090 | 0          | 1           | 1             |
| AT1G23100 | 0          | 1           | 1             |
| AT1G23860 | 0          | 1           | 1             |
| AT1G23870 | 1          | 1           | 1             |
| AT1G23920 | 1          | 0           | 1             |
| AT1G23980 | 0          | 1           | 1             |
| AT1G23990 | 0          | 1           | 1             |
| AT1G24120 | 0          | 1           | 1             |
| AT1G24130 | 0          | 1           | 1             |
| AT1G24140 | 0          | 1           | 1             |
| AT1G24145 | 0          | 1           | 1             |
| AT1G24147 | 0          | 1           | 1             |
| AT1G24160 | 1          | 0           | 1             |
| AT1G24260 | 0          | 1           | 1             |
| AT1G24265 | 1          | 1           | 1             |
| AT1G24350 | 1          | 0           | 1             |
| AT1G24590 | 0          | 1           | 1             |
| AT1G24600 | 0          | 1           | 1             |
| AT1G24625 | 0          | 1           | 1             |
| AT1G24640 | 0          | 1           | 1             |
| AT1G24851 | 1          | 0           | 1             |
| AT1G25270 | 0          | 1           | 1             |
| AT1G25275 | 0          | 1           | 1             |
| AT1G25280 | 0          | 1           | 1             |
| AT1G25390 | 0          | 1           | 1             |
| AT1G25400 | 0          | 1           | 1             |
| AT1G25410 | 0          | 1           | 1             |
| AT1G25425 | 0          | 1           | 1             |
| AT1G25430 | 0          | 1           | 1             |
| AT1G25440 | 0          | 1           | 1             |
| AT1G25450 | 0          | 1           | 1             |
| AT1G25540 | 1          | 0           | 1             |
| AT1G25560 | 0          | 1           | 1             |
| AT1G25570 | 0          | 1           | 1             |
| AT1G25784 | 1          | 0           | 1             |

Appendix Table S3

| Name      | BES_target | BZR1_target | BESBZR_target |
|-----------|------------|-------------|---------------|
| AT1G25886 | 1          | 0           | 1             |
| AT1G26150 | 0          | 1           | 1             |
| AT1G26160 | 0          | 1           | 1             |
| AT1G26200 | 0          | 1           | 1             |
| AT1G26208 | 0          | 1           | 1             |
| AT1G26210 | 0          | 1           | 1             |
| AT1G26218 | 0          | 1           | 1             |
| AT1G26270 | 0          | 1           | 1             |
| AT1G26300 | 0          | 1           | 1             |
| AT1G26550 | 0          | 1           | 1             |
| AT1G26558 | 0          | 1           | 1             |
| AT1G26720 | 0          | 1           | 1             |
| AT1G26730 | 0          | 1           | 1             |
| AT1G26799 | 0          | 1           | 1             |
| AT1G26800 | 0          | 1           | 1             |
| AT1G26810 | 0          | 1           | 1             |
| AT1G26870 | 1          | 0           | 1             |
| AT1G26930 | 0          | 1           | 1             |
| AT1G26940 | 0          | 1           | 1             |
| AT1G26945 | 0          | 1           | 1             |
| AT1G27040 | 0          | 1           | 1             |
| AT1G27050 | 1          | 1           | 1             |
| AT1G27060 | 0          | 1           | 1             |
| AT1G27080 | 1          | 0           | 1             |
| AT1G27100 | 0          | 1           | 1             |
| AT1G27110 | 0          | 1           | 1             |
| AT1G27120 | 0          | 1           | 1             |
| AT1G27130 | 0          | 1           | 1             |
| AT1G27200 | 1          | 0           | 1             |
| AT1G27210 | 1          | 1           | 1             |
| AT1G27220 | 0          | 1           | 1             |
| AT1G27285 | 0          | 1           | 1             |
| AT1G27290 | 0          | 1           | 1             |
| AT1G27300 | 0          | 1           | 1             |
| AT1G27320 | 0          | 1           | 1             |
| AT1G27330 | 0          | 1           | 1             |
| AT1G27540 | 1          | 0           | 1             |
| AT1G27560 | 1          | 0           | 1             |
| AT1G27730 | 0          | 1           | 1             |
| AT1G27740 | 0          | 1           | 1             |
| AT1G27930 | 1          | 0           | 1             |
| AT1G27940 | 1          | 0           | 1             |
| AT1G27960 | 0          | 1           | 1             |
| AT1G27970 | 0          | 1           | 1             |
| AT1G27980 | 0          | 1           | 1             |
| AT1G28135 | 0          | 1           | 1             |
| AT1G28140 | 0          | 1           | 1             |
| AT1G28230 | 1          | 1           | 1             |
| AT1G28240 | 0          | 1           | 1             |
| AT1G28270 | 0          | 1           | 1             |
| AT1G28330 | 1          | 0           | 1             |



Appendix Table S3

| Name      | BES_target | BZR1_target | BESBZR_target |
|-----------|------------|-------------|---------------|
| AT1G28350 | 0          | 1           | 1             |
| AT1G28360 | 1          | 1           | 1             |
| AT1G28370 | 0          | 1           | 1             |
| AT1G28375 | 0          | 1           | 1             |
| AT1G28450 | 1          | 0           | 1             |
| AT1G28580 | 0          | 1           | 1             |
| AT1G28590 | 0          | 1           | 1             |
| AT1G29050 | 0          | 1           | 1             |
| AT1G29060 | 0          | 1           | 1             |
| AT1G29390 | 1          | 1           | 1             |
| AT1G29395 | 1          | 1           | 1             |
| AT1G29400 | 0          | 1           | 1             |
| AT1G29420 | 0          | 1           | 1             |
| AT1G29430 | 0          | 1           | 1             |
| AT1G29440 | 0          | 1           | 1             |
| AT1G29450 | 0          | 1           | 1             |
| AT1G29660 | 0          | 1           | 1             |
| AT1G29670 | 0          | 1           | 1             |
| AT1G29680 | 0          | 1           | 1             |
| AT1G29980 | 1          | 0           | 1             |
| AT1G30100 | 0          | 1           | 1             |
| AT1G30110 | 0          | 1           | 1             |
| AT1G30120 | 1          | 0           | 1             |
| AT1G30180 | 1          | 0           | 1             |
| AT1G30250 | 0          | 1           | 1             |
| AT1G30260 | 0          | 1           | 1             |
| AT1G30310 | 0          | 1           | 1             |
| AT1G30320 | 0          | 1           | 1             |
| AT1G30330 | 1          | 1           | 1             |
| AT1G30340 | 0          | 1           | 1             |
| AT1G30350 | 0          | 1           | 1             |
| AT1G30500 | 1          | 0           | 1             |
| AT1G30720 | 0          | 1           | 1             |
| AT1G30730 | 0          | 1           | 1             |
| AT1G30940 | 1          | 0           | 1             |
| AT1G31170 | 0          | 1           | 1             |
| AT1G31173 | 0          | 1           | 1             |
| AT1G31340 | 0          | 1           | 1             |
| AT1G31350 | 0          | 1           | 1             |
| AT1G31355 | 0          | 1           | 1             |
| AT1G31570 | 0          | 1           | 1             |
| AT1G31580 | 0          | 1           | 1             |
| AT1G31600 | 0          | 1           | 1             |
| AT1G31870 | 0          | 1           | 1             |
| AT1G31880 | 0          | 1           | 1             |
| AT1G31950 | 1          | 0           | 1             |
| AT1G32160 | 0          | 1           | 1             |
| AT1G32170 | 0          | 1           | 1             |
| AT1G32180 | 1          | 0           | 1             |
| AT1G32190 | 0          | 1           | 1             |
| AT1G32200 | 0          | 1           | 1             |

Appendix Table S3

| Name      | BES_target | BZR1_target | BESBZR_target |
|-----------|------------|-------------|---------------|
| AT1G32230 | 0          | 1           | 1             |
| AT1G32240 | 0          | 1           | 1             |
| AT1G32380 | 1          | 0           | 1             |
| AT1G32530 | 0          | 1           | 1             |
| AT1G32540 | 0          | 1           | 1             |
| AT1G32550 | 0          | 1           | 1             |
| AT1G32690 | 0          | 1           | 1             |
| AT1G32700 | 0          | 1           | 1             |
| AT1G32710 | 1          | 1           | 1             |
| AT1G32860 | 1          | 0           | 1             |
| AT1G32900 | 1          | 0           | 1             |
| AT1G32910 | 0          | 1           | 1             |
| AT1G32920 | 0          | 1           | 1             |
| AT1G32928 | 0          | 1           | 1             |
| AT1G33050 | 0          | 1           | 1             |
| AT1G33055 | 0          | 1           | 1             |
| AT1G33230 | 0          | 1           | 1             |
| AT1G33240 | 0          | 1           | 1             |
| AT1G33250 | 0          | 1           | 1             |
| AT1G33260 | 0          | 1           | 1             |
| AT1G33550 | 0          | 1           | 1             |
| AT1G33560 | 0          | 1           | 1             |
| AT1G33580 | 1          | 0           | 1             |
| AT1G33590 | 0          | 1           | 1             |
| AT1G33600 | 0          | 1           | 1             |
| AT1G33607 | 0          | 1           | 1             |
| AT1G33700 | 1          | 0           | 1             |
| AT1G33750 | 0          | 1           | 1             |
| AT1G33760 | 0          | 1           | 1             |
| AT1G33770 | 0          | 1           | 1             |
| AT1G34240 | 0          | 1           | 1             |
| AT1G34245 | 1          | 1           | 1             |
| AT1G34250 | 0          | 1           | 1             |
| AT1G34400 | 1          | 0           | 1             |
| AT1G34460 | 1          | 0           | 1             |
| AT1G34730 | 1          | 0           | 1             |
| AT1G34904 | 1          | 0           | 1             |
| AT1G34967 | 1          | 0           | 1             |
| AT1G35350 | 1          | 0           | 1             |
| AT1G35405 | 1          | 0           | 1             |
| AT1G35560 | 0          | 1           | 1             |
| AT1G35570 | 0          | 1           | 1             |
| AT1G35740 | 1          | 0           | 1             |
| AT1G35770 | 0          | 1           | 1             |
| AT1G35780 | 1          | 1           | 1             |
| AT1G35790 | 1          | 1           | 1             |
| AT1G36050 | 0          | 1           | 1             |
| AT1G36060 | 0          | 1           | 1             |
| AT1G36070 | 0          | 1           | 1             |
| AT1G36310 | 1          | 0           | 1             |
| AT1G36395 | 1          | 0           | 1             |

Appendix Table S3

| Name      | BES_target | BZR1_target | BESBZR_target |
|-----------|------------|-------------|---------------|
| AT1G36520 | 1          | 0           | 1             |
| AT1G36550 | 1          | 0           | 1             |
| AT1G36610 | 1          | 0           | 1             |
| AT1G36890 | 1          | 0           | 1             |
| AT1G36936 | 1          | 0           | 1             |
| AT1G37057 | 1          | 0           | 1             |
| AT1G37100 | 1          | 0           | 1             |
| AT1G37120 | 0          | 1           | 1             |
| AT1G37130 | 1          | 1           | 1             |
| AT1G37170 | 1          | 0           | 1             |
| AT1G37200 | 1          | 0           | 1             |
| AT1G37537 | 1          | 0           | 1             |
| AT1G38140 | 0          | 1           | 1             |
| AT1G38149 | 1          | 1           | 1             |
| AT1G38416 | 1          | 0           | 1             |
| AT1G38440 | 1          | 0           | 1             |
| AT1G38460 | 1          | 0           | 1             |
| AT1G39670 | 1          | 0           | 1             |
| AT1G40127 | 1          | 0           | 1             |
| AT1G40129 | 1          | 0           | 1             |
| AT1G41775 | 1          | 0           | 1             |
| AT1G41797 | 1          | 0           | 1             |
| AT1G41896 | 1          | 0           | 1             |
| AT1G42393 | 1          | 0           | 1             |
| AT1G42780 | 1          | 0           | 1             |
| AT1G43725 | 1          | 0           | 1             |
| AT1G43730 | 1          | 0           | 1             |
| AT1G43745 | 1          | 0           | 1             |
| AT1G43755 | 1          | 0           | 1             |
| AT1G44350 | 0          | 1           | 1             |
| AT1G44382 | 0          | 1           | 1             |
| AT1G44760 | 0          | 1           | 1             |
| AT1G44770 | 0          | 1           | 1             |
| AT1G44840 | 1          | 0           | 1             |
| AT1G45150 | 1          | 0           | 1             |
| AT1G45688 | 1          | 0           | 1             |
| AT1G46408 | 0          | 1           | 1             |
| AT1G46480 | 0          | 1           | 1             |
| AT1G46552 | 1          | 1           | 1             |
| AT1G46624 | 0          | 1           | 1             |
| AT1G46768 | 0          | 1           | 1             |
| AT1G46840 | 0          | 1           | 1             |
| AT1G47860 | 1          | 0           | 1             |
| AT1G47960 | 0          | 1           | 1             |
| AT1G47970 | 1          | 1           | 1             |
| AT1G47990 | 0          | 1           | 1             |
| AT1G48000 | 0          | 1           | 1             |
| AT1G48270 | 0          | 1           | 1             |
| AT1G48280 | 0          | 1           | 1             |
| AT1G48290 | 0          | 1           | 1             |
| AT1G48380 | 1          | 0           | 1             |

Appendix Table S3

| Name      | BES_target | BZR1_target | BESBZR_target |
|-----------|------------|-------------|---------------|
| AT1G48390 | 1          | 0           | 1             |
| AT1G48405 | 1          | 0           | 1             |
| AT1G48480 | 0          | 1           | 1             |
| AT1G48490 | 0          | 1           | 1             |
| AT1G48680 | 1          | 0           | 1             |
| AT1G48742 | 0          | 1           | 1             |
| AT1G48745 | 0          | 1           | 1             |
| AT1G48830 | 1          | 0           | 1             |
| AT1G48840 | 1          | 0           | 1             |
| AT1G49330 | 1          | 0           | 1             |
| AT1G49440 | 0          | 1           | 1             |
| AT1G49450 | 0          | 1           | 1             |
| AT1G49460 | 0          | 1           | 1             |
| AT1G49490 | 0          | 1           | 1             |
| AT1G49500 | 1          | 1           | 1             |
| AT1G49510 | 0          | 1           | 1             |
| AT1G49730 | 0          | 1           | 1             |
| AT1G49740 | 0          | 1           | 1             |
| AT1G49770 | 0          | 1           | 1             |
| AT1G49780 | 0          | 1           | 1             |
| AT1G49790 | 0          | 1           | 1             |
| AT1G49840 | 0          | 1           | 1             |
| AT1G50000 | 1          | 0           | 1             |
| AT1G50010 | 1          | 0           | 1             |
| AT1G50290 | 1          | 0           | 1             |
| AT1G50420 | 0          | 1           | 1             |
| AT1G50430 | 0          | 1           | 1             |
| AT1G51085 | 0          | 1           | 1             |
| AT1G51090 | 0          | 1           | 1             |
| AT1G51130 | 0          | 1           | 1             |
| AT1G51140 | 0          | 1           | 1             |
| AT1G51160 | 0          | 1           | 1             |
| AT1G51170 | 1          | 1           | 1             |
| AT1G51172 | 0          | 1           | 1             |
| AT1G51680 | 0          | 1           | 1             |
| AT1G51690 | 0          | 1           | 1             |
| AT1G51700 | 0          | 1           | 1             |
| AT1G51710 | 0          | 1           | 1             |
| AT1G51802 | 0          | 1           | 1             |
| AT1G51805 | 0          | 1           | 1             |
| AT1G51810 | 1          | 1           | 1             |
| AT1G51940 | 0          | 1           | 1             |
| AT1G51950 | 0          | 1           | 1             |
| AT1G52565 | 0          | 1           | 1             |
| AT1G52570 | 0          | 1           | 1             |
| AT1G52770 | 0          | 1           | 1             |
| AT1G52780 | 0          | 1           | 1             |
| AT1G52880 | 0          | 1           | 1             |
| AT1G52890 | 0          | 1           | 1             |
| AT1G52900 | 0          | 1           | 1             |
| AT1G53165 | 0          | 1           | 1             |

Appendix Table S3

| Name      | BES_target | BZR1_target | BESBZR_target |
|-----------|------------|-------------|---------------|
| AT1G53170 | 1          | 1           | 1             |
| AT1G53220 | 0          | 1           | 1             |
| AT1G53230 | 0          | 1           | 1             |
| AT1G53233 | 0          | 1           | 1             |
| AT1G53420 | 0          | 1           | 1             |
| AT1G53430 | 0          | 1           | 1             |
| AT1G53440 | 0          | 1           | 1             |
| AT1G53510 | 1          | 1           | 1             |
| AT1G53520 | 0          | 1           | 1             |
| AT1G53580 | 1          | 0           | 1             |
| AT1G53690 | 1          | 0           | 1             |
| AT1G53830 | 0          | 1           | 1             |
| AT1G53840 | 0          | 1           | 1             |
| AT1G54100 | 1          | 0           | 1             |
| AT1G54110 | 1          | 0           | 1             |
| AT1G54130 | 1          | 0           | 1             |
| AT1G54200 | 0          | 1           | 1             |
| AT1G54210 | 1          | 1           | 1             |
| AT1G55110 | 0          | 1           | 1             |
| AT1G55120 | 0          | 1           | 1             |
| AT1G55325 | 0          | 1           | 1             |
| AT1G55330 | 0          | 1           | 1             |
| AT1G55360 | 1          | 0           | 1             |
| AT1G55610 | 0          | 1           | 1             |
| AT1G55620 | 0          | 1           | 1             |
| AT1G55690 | 0          | 1           | 1             |
| AT1G55700 | 0          | 1           | 1             |
| AT1G56145 | 0          | 1           | 1             |
| AT1G56150 | 0          | 1           | 1             |
| AT1G56210 | 1          | 1           | 1             |
| AT1G56220 | 0          | 1           | 1             |
| AT1G56242 | 0          | 1           | 1             |
| AT1G56250 | 0          | 1           | 1             |
| AT1G56420 | 1          | 0           | 1             |
| AT1G56540 | 1          | 0           | 1             |
| AT1G56590 | 1          | 1           | 1             |
| AT1G56600 | 0          | 1           | 1             |
| AT1G56630 | 0          | 1           | 1             |
| AT1G56640 | 0          | 1           | 1             |
| AT1G56650 | 0          | 1           | 1             |
| AT1G56660 | 0          | 1           | 1             |
| AT1G56670 | 0          | 1           | 1             |
| AT1G57600 | 1          | 1           | 1             |
| AT1G57610 | 0          | 1           | 1             |
| AT1G57640 | 1          | 0           | 1             |
| AT1G57830 | 1          | 0           | 1             |
| AT1G57980 | 0          | 1           | 1             |
| AT1G57990 | 0          | 1           | 1             |
| AT1G58007 | 0          | 1           | 1             |
| AT1G58050 | 1          | 0           | 1             |
| AT1G58340 | 0          | 1           | 1             |

Appendix Table S3

| Name      | BES_target | BZR1_target | BESBZR_target |
|-----------|------------|-------------|---------------|
| AT1G58350 | 0          | 1           | 1             |
| AT1G58410 | 0          | 1           | 1             |
| AT1G58420 | 0          | 1           | 1             |
| AT1G58520 | 0          | 1           | 1             |
| AT1G58590 | 0          | 1           | 1             |
| AT1G58602 | 0          | 1           | 1             |
| AT1G59865 | 0          | 1           | 1             |
| AT1G59870 | 0          | 1           | 1             |
| AT1G59970 | 1          | 0           | 1             |
| AT1G60075 | 1          | 0           | 1             |
| AT1G60095 | 1          | 0           | 1             |
| AT1G60150 | 0          | 1           | 1             |
| AT1G60160 | 0          | 1           | 1             |
| AT1G60190 | 1          | 0           | 1             |
| AT1G61100 | 1          | 0           | 1             |
| AT1G61370 | 0          | 1           | 1             |
| AT1G61380 | 0          | 1           | 1             |
| AT1G61390 | 0          | 1           | 1             |
| AT1G61460 | 1          | 0           | 1             |
| AT1G61660 | 0          | 1           | 1             |
| AT1G61667 | 0          | 1           | 1             |
| AT1G61730 | 0          | 1           | 1             |
| AT1G61740 | 0          | 1           | 1             |
| AT1G61750 | 0          | 1           | 1             |
| AT1G61795 | 0          | 1           | 1             |
| AT1G61800 | 0          | 1           | 1             |
| AT1G61970 | 1          | 0           | 1             |
| AT1G62085 | 1          | 0           | 1             |
| AT1G62300 | 0          | 1           | 1             |
| AT1G62305 | 0          | 1           | 1             |
| AT1G62370 | 1          | 1           | 1             |
| AT1G62380 | 1          | 1           | 1             |
| AT1G62420 | 0          | 1           | 1             |
| AT1G62430 | 0          | 1           | 1             |
| AT1G62520 | 1          | 0           | 1             |
| AT1G62570 | 0          | 1           | 1             |
| AT1G62580 | 0          | 1           | 1             |
| AT1G62950 | 1          | 0           | 1             |
| AT1G63050 | 1          | 0           | 1             |
| AT1G63090 | 1          | 1           | 1             |
| AT1G63100 | 0          | 1           | 1             |
| AT1G63120 | 0          | 1           | 1             |
| AT1G63130 | 0          | 1           | 1             |
| AT1G63240 | 0          | 1           | 1             |
| AT1G63245 | 0          | 1           | 1             |
| AT1G63710 | 1          | 1           | 1             |
| AT1G63720 | 0          | 1           | 1             |
| AT1G63730 | 0          | 1           | 1             |
| AT1G63740 | 0          | 1           | 1             |
| AT1G63750 | 0          | 1           | 1             |
| AT1G63820 | 0          | 1           | 1             |

Appendix Table S3

| Name      | BES_target | BZR1_target | BESBZR_target |
|-----------|------------|-------------|---------------|
| AT1G63830 | 0          | 1           | 1             |
| AT1G63840 | 0          | 1           | 1             |
| AT1G63850 | 0          | 1           | 1             |
| AT1G63860 | 0          | 1           | 1             |
| AT1G63870 | 0          | 1           | 1             |
| AT1G63880 | 0          | 1           | 1             |
| AT1G63900 | 0          | 1           | 1             |
| AT1G64040 | 1          | 0           | 1             |
| AT1G64060 | 1          | 0           | 1             |
| AT1G64140 | 1          | 0           | 1             |
| AT1G64150 | 1          | 0           | 1             |
| AT1G64380 | 1          | 1           | 1             |
| AT1G64385 | 0          | 1           | 1             |
| AT1G64390 | 1          | 0           | 1             |
| AT1G64450 | 1          | 0           | 1             |
| AT1G64700 | 0          | 1           | 1             |
| AT1G64710 | 0          | 1           | 1             |
| AT1G65180 | 1          | 0           | 1             |
| AT1G65295 | 0          | 1           | 1             |
| AT1G65300 | 0          | 1           | 1             |
| AT1G65585 | 0          | 1           | 1             |
| AT1G65590 | 0          | 1           | 1             |
| AT1G65610 | 0          | 1           | 1             |
| AT1G65950 | 0          | 1           | 1             |
| AT1G65960 | 0          | 1           | 1             |
| AT1G66130 | 0          | 1           | 1             |
| AT1G66140 | 0          | 1           | 1             |
| AT1G66145 | 0          | 1           | 1             |
| AT1G66150 | 0          | 1           | 1             |
| AT1G66160 | 0          | 1           | 1             |
| AT1G66170 | 1          | 0           | 1             |
| AT1G66345 | 0          | 1           | 1             |
| AT1G66350 | 0          | 1           | 1             |
| AT1G66430 | 1          | 0           | 1             |
| AT1G66470 | 0          | 1           | 1             |
| AT1G66480 | 0          | 1           | 1             |
| AT1G66550 | 0          | 1           | 1             |
| AT1G66560 | 0          | 1           | 1             |
| AT1G66590 | 0          | 1           | 1             |
| AT1G66725 | 1          | 0           | 1             |
| AT1G66750 | 0          | 1           | 1             |
| AT1G66760 | 0          | 1           | 1             |
| AT1G66870 | 0          | 1           | 1             |
| AT1G66880 | 0          | 1           | 1             |
| AT1G66890 | 1          | 1           | 1             |
| AT1G66910 | 0          | 1           | 1             |
| AT1G66920 | 0          | 1           | 1             |
| AT1G66930 | 0          | 1           | 1             |
| AT1G67140 | 1          | 0           | 1             |
| AT1G67300 | 1          | 0           | 1             |
| AT1G67360 | 1          | 0           | 1             |

Appendix Table S3

| Name      | BES_target | BZR1_target | BESBZR_target |
|-----------|------------|-------------|---------------|
| AT1G67365 | 1          | 0           | 1             |
| AT1G67890 | 0          | 1           | 1             |
| AT1G67900 | 1          | 1           | 1             |
| AT1G67910 | 0          | 1           | 1             |
| AT1G67920 | 0          | 1           | 1             |
| AT1G68100 | 0          | 1           | 1             |
| AT1G68110 | 1          | 1           | 1             |
| AT1G68120 | 0          | 1           | 1             |
| AT1G68320 | 0          | 1           | 1             |
| AT1G68330 | 0          | 1           | 1             |
| AT1G68430 | 0          | 1           | 1             |
| AT1G68440 | 1          | 1           | 1             |
| AT1G68450 | 0          | 1           | 1             |
| AT1G68520 | 0          | 1           | 1             |
| AT1G68530 | 0          | 1           | 1             |
| AT1G68620 | 1          | 0           | 1             |
| AT1G68660 | 0          | 1           | 1             |
| AT1G68670 | 0          | 1           | 1             |
| AT1G68710 | 0          | 1           | 1             |
| AT1G68720 | 0          | 1           | 1             |
| AT1G68765 | 0          | 1           | 1             |
| AT1G68780 | 0          | 1           | 1             |
| AT1G68830 | 0          | 1           | 1             |
| AT1G68840 | 0          | 1           | 1             |
| AT1G68875 | 1          | 0           | 1             |
| AT1G69150 | 1          | 1           | 1             |
| AT1G69160 | 1          | 1           | 1             |
| AT1G69250 | 0          | 1           | 1             |
| AT1G69260 | 1          | 1           | 1             |
| AT1G69295 | 0          | 1           | 1             |
| AT1G69300 | 0          | 1           | 1             |
| AT1G69310 | 0          | 1           | 1             |
| AT1G69330 | 1          | 0           | 1             |
| AT1G69340 | 1          | 0           | 1             |
| AT1G69400 | 0          | 1           | 1             |
| AT1G69410 | 1          | 1           | 1             |
| AT1G69420 | 0          | 1           | 1             |
| AT1G69440 | 0          | 1           | 1             |
| AT1G69485 | 0          | 1           | 1             |
| AT1G69490 | 0          | 1           | 1             |
| AT1G69500 | 0          | 1           | 1             |
| AT1G69510 | 0          | 1           | 1             |
| AT1G69520 | 0          | 1           | 1             |
| AT1G69526 | 0          | 1           | 1             |
| AT1G69530 | 0          | 1           | 1             |
| AT1G69570 | 1          | 1           | 1             |
| AT1G69580 | 0          | 1           | 1             |
| AT1G69600 | 0          | 1           | 1             |
| AT1G69610 | 0          | 1           | 1             |
| AT1G69740 | 0          | 1           | 1             |
| AT1G69750 | 0          | 1           | 1             |



Appendix Table S3

| Name      | BES_target | BZR1_target | BESBZR_target |
|-----------|------------|-------------|---------------|
| AT1G69760 | 0          | 1           | 1             |
| AT1G69770 | 0          | 1           | 1             |
| AT1G69840 | 0          | 1           | 1             |
| AT1G69850 | 1          | 1           | 1             |
| AT1G69860 | 0          | 1           | 1             |
| AT1G69870 | 1          | 1           | 1             |
| AT1G69880 | 0          | 1           | 1             |
| AT1G69890 | 0          | 1           | 1             |
| AT1G69900 | 0          | 1           | 1             |
| AT1G69910 | 1          | 0           | 1             |
| AT1G69930 | 0          | 1           | 1             |
| AT1G69935 | 0          | 1           | 1             |
| AT1G70090 | 1          | 0           | 1             |
| AT1G70200 | 0          | 1           | 1             |
| AT1G70210 | 1          | 1           | 1             |
| AT1G70260 | 0          | 1           | 1             |
| AT1G70270 | 1          | 1           | 1             |
| AT1G70280 | 0          | 1           | 1             |
| AT1G70290 | 0          | 1           | 1             |
| AT1G70300 | 1          | 1           | 1             |
| AT1G70310 | 0          | 1           | 1             |
| AT1G70370 | 1          | 1           | 1             |
| AT1G70380 | 0          | 1           | 1             |
| AT1G70420 | 0          | 1           | 1             |
| AT1G70490 | 1          | 0           | 1             |
| AT1G70520 | 0          | 1           | 1             |
| AT1G70530 | 0          | 1           | 1             |
| AT1G70540 | 1          | 1           | 1             |
| AT1G70580 | 0          | 1           | 1             |
| AT1G70590 | 1          | 1           | 1             |
| AT1G70700 | 0          | 1           | 1             |
| AT1G70710 | 0          | 1           | 1             |
| AT1G70720 | 0          | 1           | 1             |
| AT1G70740 | 0          | 1           | 1             |
| AT1G70750 | 0          | 1           | 1             |
| AT1G70770 | 0          | 1           | 1             |
| AT1G70780 | 0          | 1           | 1             |
| AT1G70790 | 0          | 1           | 1             |
| AT1G70940 | 0          | 1           | 1             |
| AT1G70950 | 1          | 1           | 1             |
| AT1G71015 | 0          | 1           | 1             |
| AT1G71020 | 0          | 1           | 1             |
| AT1G71030 | 1          | 1           | 1             |
| AT1G71040 | 0          | 1           | 1             |
| AT1G71050 | 0          | 1           | 1             |
| AT1G71080 | 1          | 0           | 1             |
| AT1G71140 | 0          | 1           | 1             |
| AT1G71150 | 0          | 1           | 1             |
| AT1G71400 | 1          | 0           | 1             |
| AT1G71500 | 0          | 1           | 1             |
| AT1G71520 | 0          | 1           | 1             |

Appendix Table S3

| Name      | BES_target | BZR1_target | BESBZR_target |
|-----------|------------|-------------|---------------|
| AT1G71870 | 1          | 1           | 1             |
| AT1G71880 | 1          | 1           | 1             |
| AT1G71920 | 1          | 1           | 1             |
| AT1G71930 | 0          | 1           | 1             |
| AT1G71950 | 0          | 1           | 1             |
| AT1G71960 | 0          | 1           | 1             |
| AT1G71970 | 0          | 1           | 1             |
| AT1G72020 | 1          | 0           | 1             |
| AT1G72100 | 1          | 0           | 1             |
| AT1G72150 | 0          | 1           | 1             |
| AT1G72160 | 0          | 1           | 1             |
| AT1G72175 | 0          | 1           | 1             |
| AT1G72180 | 1          | 1           | 1             |
| AT1G72250 | 1          | 0           | 1             |
| AT1G72410 | 0          | 1           | 1             |
| AT1G72416 | 0          | 1           | 1             |
| AT1G72420 | 0          | 1           | 1             |
| AT1G72430 | 0          | 1           | 1             |
| AT1G72440 | 0          | 1           | 1             |
| AT1G72450 | 1          | 1           | 1             |
| AT1G72460 | 0          | 1           | 1             |
| AT1G72510 | 1          | 0           | 1             |
| AT1G72560 | 1          | 0           | 1             |
| AT1G72600 | 0          | 1           | 1             |
| AT1G72610 | 0          | 1           | 1             |
| AT1G72620 | 0          | 1           | 1             |
| AT1G72645 | 1          | 0           | 1             |
| AT1G72650 | 1          | 0           | 1             |
| AT1G72690 | 0          | 1           | 1             |
| AT1G72700 | 0          | 1           | 1             |
| AT1G72810 | 1          | 0           | 1             |
| AT1G73060 | 0          | 1           | 1             |
| AT1G73080 | 0          | 1           | 1             |
| AT1G73170 | 1          | 0           | 1             |
| AT1G73390 | 0          | 1           | 1             |
| AT1G73400 | 0          | 1           | 1             |
| AT1G73470 | 1          | 0           | 1             |
| AT1G73480 | 1          | 0           | 1             |
| AT1G73490 | 0          | 1           | 1             |
| AT1G73500 | 0          | 1           | 1             |
| AT1G73510 | 0          | 1           | 1             |
| AT1G73530 | 0          | 1           | 1             |
| AT1G73540 | 0          | 1           | 1             |
| AT1G73550 | 0          | 1           | 1             |
| AT1G73660 | 0          | 1           | 1             |
| AT1G73670 | 0          | 1           | 1             |
| AT1G73870 | 0          | 1           | 1             |
| AT1G73875 | 0          | 1           | 1             |
| AT1G73880 | 1          | 1           | 1             |
| AT1G74010 | 0          | 1           | 1             |
| AT1G74020 | 0          | 1           | 1             |

Appendix Table S3

| Name      | BES_target | BZR1_target | BESBZR_target |
|-----------|------------|-------------|---------------|
| AT1G74030 | 0          | 1           | 1             |
| AT1G74330 | 1          | 0           | 1             |
| AT1G74420 | 0          | 1           | 1             |
| AT1G74430 | 0          | 1           | 1             |
| AT1G74440 | 0          | 1           | 1             |
| AT1G74450 | 0          | 1           | 1             |
| AT1G74500 | 0          | 1           | 1             |
| AT1G74510 | 0          | 1           | 1             |
| AT1G74660 | 0          | 1           | 1             |
| AT1G74670 | 1          | 1           | 1             |
| AT1G74920 | 0          | 1           | 1             |
| AT1G74930 | 0          | 1           | 1             |
| AT1G74940 | 0          | 1           | 1             |
| AT1G75070 | 0          | 1           | 1             |
| AT1G75080 | 0          | 1           | 1             |
| AT1G75180 | 1          | 0           | 1             |
| AT1G75440 | 0          | 1           | 1             |
| AT1G75450 | 1          | 1           | 1             |
| AT1G75460 | 0          | 1           | 1             |
| AT1G75480 | 0          | 1           | 1             |
| AT1G75490 | 0          | 1           | 1             |
| AT1G75500 | 0          | 1           | 1             |
| AT1G75510 | 0          | 1           | 1             |
| AT1G75520 | 0          | 1           | 1             |
| AT1G75530 | 0          | 1           | 1             |
| AT1G75700 | 0          | 1           | 1             |
| AT1G75710 | 0          | 1           | 1             |
| AT1G75720 | 0          | 1           | 1             |
| AT1G75750 | 1          | 1           | 1             |
| AT1G75760 | 0          | 1           | 1             |
| AT1G75810 | 1          | 0           | 1             |
| AT1G75830 | 0          | 1           | 1             |
| AT1G76070 | 0          | 1           | 1             |
| AT1G76080 | 0          | 1           | 1             |
| AT1G76090 | 0          | 1           | 1             |
| AT1G76100 | 0          | 1           | 1             |
| AT1G76150 | 0          | 1           | 1             |
| AT1G76160 | 0          | 1           | 1             |
| AT1G76170 | 0          | 1           | 1             |
| AT1G76180 | 0          | 1           | 1             |
| AT1G76185 | 0          | 1           | 1             |
| AT1G76240 | 1          | 0           | 1             |
| AT1G76420 | 0          | 1           | 1             |
| AT1G76430 | 0          | 1           | 1             |
| AT1G76490 | 0          | 1           | 1             |
| AT1G76500 | 1          | 1           | 1             |
| AT1G76570 | 0          | 1           | 1             |
| AT1G76580 | 1          | 1           | 1             |
| AT1G76590 | 0          | 1           | 1             |
| AT1G76600 | 0          | 1           | 1             |
| AT1G76610 | 0          | 1           | 1             |

Appendix Table S3

| Name      | BES_target | BZR1_target | BESBZR_target |
|-----------|------------|-------------|---------------|
| AT1G76620 | 0          | 1           | 1             |
| AT1G76650 | 0          | 1           | 1             |
| AT1G76660 | 0          | 1           | 1             |
| AT1G76880 | 0          | 1           | 1             |
| AT1G76890 | 0          | 1           | 1             |
| AT1G76900 | 0          | 1           | 1             |
| AT1G76980 | 0          | 1           | 1             |
| AT1G76990 | 0          | 1           | 1             |
| AT1G77050 | 0          | 1           | 1             |
| AT1G77060 | 1          | 1           | 1             |
| AT1G77080 | 0          | 1           | 1             |
| AT1G77095 | 1          | 0           | 1             |
| AT1G77440 | 0          | 1           | 1             |
| AT1G77450 | 1          | 1           | 1             |
| AT1G77490 | 0          | 1           | 1             |
| AT1G77500 | 0          | 1           | 1             |
| AT1G77630 | 0          | 1           | 1             |
| AT1G77640 | 0          | 1           | 1             |
| AT1G77682 | 0          | 1           | 1             |
| AT1G77690 | 0          | 1           | 1             |
| AT1G77730 | 0          | 1           | 1             |
| AT1G77740 | 0          | 1           | 1             |
| AT1G77750 | 0          | 1           | 1             |
| AT1G77760 | 0          | 1           | 1             |
| AT1G77765 | 0          | 1           | 1             |
| AT1G77990 | 0          | 1           | 1             |
| AT1G78000 | 0          | 1           | 1             |
| AT1G78010 | 0          | 1           | 1             |
| AT1G78020 | 0          | 1           | 1             |
| AT1g78070 | 0          | 1           | 1             |
| AT1G78080 | 0          | 1           | 1             |
| AT1G78090 | 0          | 1           | 1             |
| AT1G78095 | 0          | 1           | 1             |
| AT1G78100 | 0          | 1           | 1             |
| AT1G78170 | 1          | 0           | 1             |
| AT1G78220 | 0          | 1           | 1             |
| AT1G78230 | 0          | 1           | 1             |
| AT1G78240 | 0          | 1           | 1             |
| AT1G78250 | 0          | 1           | 1             |
| AT1G78460 | 1          | 1           | 1             |
| AT1G78470 | 0          | 1           | 1             |
| AT1G78610 | 0          | 1           | 1             |
| AT1G78620 | 0          | 1           | 1             |
| AT1G78630 | 0          | 1           | 1             |
| AT1G78700 | 1          | 0           | 1             |
| AT1G78790 | 1          | 0           | 1             |
| AT1G78850 | 0          | 1           | 1             |
| AT1G78860 | 0          | 1           | 1             |
| AT1G78980 | 1          | 0           | 1             |
| AT1G79050 | 0          | 1           | 1             |
| AT1G79060 | 0          | 1           | 1             |

Appendix Table S3

| Name      | BES_target | BZR1_target | BESBZR_target |
|-----------|------------|-------------|---------------|
| AT1G79070 | 0          | 1           | 1             |
| AT1G79110 | 1          | 1           | 1             |
| AT1G79120 | 1          | 1           | 1             |
| AT1G79150 | 0          | 1           | 1             |
| AT1G79160 | 0          | 1           | 1             |
| AT1G79170 | 0          | 1           | 1             |
| AT1G79620 | 0          | 1           | 1             |
| AT1G79630 | 1          | 1           | 1             |
| AT1G79640 | 0          | 1           | 1             |
| AT1G79700 | 1          | 0           | 1             |
| AT1G80110 | 0          | 1           | 1             |
| AT1G80120 | 0          | 1           | 1             |
| AT1G80130 | 1          | 1           | 1             |
| AT1G80133 | 0          | 1           | 1             |
| AT1G80180 | 0          | 1           | 1             |
| AT1G80190 | 0          | 1           | 1             |
| AT1G80280 | 0          | 1           | 1             |
| AT1G80290 | 0          | 1           | 1             |
| AT1G80300 | 0          | 1           | 1             |
| AT1G80420 | 0          | 1           | 1             |
| AT1G80430 | 0          | 1           | 1             |
| AT1G80440 | 1          | 1           | 1             |
| AT1G80450 | 0          | 1           | 1             |
| AT1G80460 | 1          | 1           | 1             |
| AT1G80490 | 0          | 1           | 1             |
| AT1G80500 | 0          | 1           | 1             |
| AT1G80530 | 1          | 0           | 1             |
| AT1G80600 | 0          | 1           | 1             |
| AT1G80610 | 1          | 1           | 1             |
| AT1G80620 | 1          | 1           | 1             |
| AT1G80810 | 0          | 1           | 1             |
| AT1G80820 | 0          | 1           | 1             |
| AT1G80830 | 0          | 1           | 1             |
| AT1G80840 | 0          | 1           | 1             |
| AT1G80850 | 0          | 1           | 1             |
| AT1G80870 | 1          | 0           | 1             |
| AT2G01022 | 1          | 0           | 1             |
| AT2G01034 | 1          | 0           | 1             |
| AT2G01140 | 0          | 1           | 1             |
| AT2G01150 | 0          | 1           | 1             |
| AT2G01300 | 1          | 0           | 1             |
| AT2G01410 | 0          | 1           | 1             |
| AT2G01420 | 1          | 1           | 1             |
| AT2G01430 | 0          | 1           | 1             |
| AT2G01490 | 0          | 1           | 1             |
| AT2G01500 | 0          | 1           | 1             |
| AT2G01570 | 0          | 1           | 1             |
| AT2G01580 | 0          | 1           | 1             |
| AT2G01670 | 0          | 1           | 1             |
| AT2G01680 | 0          | 1           | 1             |
| AT2G01840 | 0          | 1           | 1             |

Appendix Table S3

| Name      | BES_target | BZR1_target | BESBZR_target |
|-----------|------------|-------------|---------------|
| AT2G01850 | 0          | 1           | 1             |
| AT2G02440 | 0          | 1           | 1             |
| AT2G02450 | 0          | 1           | 1             |
| AT2G02810 | 1          | 0           | 1             |
| AT2G02860 | 0          | 1           | 1             |
| AT2G02870 | 0          | 1           | 1             |
| AT2G03010 | 0          | 1           | 1             |
| AT2G03020 | 0          | 1           | 1             |
| AT2G03030 | 0          | 1           | 1             |
| AT2G03340 | 0          | 1           | 1             |
| AT2G03350 | 0          | 1           | 1             |
| AT2G03720 | 0          | 1           | 1             |
| AT2G03730 | 0          | 1           | 1             |
| AT2G03740 | 0          | 1           | 1             |
| AT2G03750 | 0          | 1           | 1             |
| AT2G03760 | 0          | 1           | 1             |
| AT2G03890 | 0          | 1           | 1             |
| AT2G03900 | 0          | 1           | 1             |
| AT2G04270 | 1          | 0           | 1             |
| AT2G04510 | 0          | 1           | 1             |
| AT2G04515 | 0          | 1           | 1             |
| AT2G04790 | 0          | 1           | 1             |
| AT2G04795 | 0          | 1           | 1             |
| AT2G04800 | 0          | 1           | 1             |
| AT2G05110 | 1          | 0           | 1             |
| AT2G05185 | 1          | 0           | 1             |
| AT2G05240 | 1          | 0           | 1             |
| AT2G05567 | 1          | 0           | 1             |
| AT2G05780 | 0          | 1           | 1             |
| AT2G05790 | 1          | 1           | 1             |
| AT2G05960 | 1          | 0           | 1             |
| AT2G06290 | 1          | 0           | 1             |
| AT2G06490 | 1          | 0           | 1             |
| AT2G06760 | 1          | 0           | 1             |
| AT2G06860 | 1          | 0           | 1             |
| AT2G06885 | 1          | 0           | 1             |
| AT2G07010 | 1          | 0           | 1             |
| AT2G07120 | 1          | 0           | 1             |
| AT2G07410 | 1          | 0           | 1             |
| AT2G07440 | 1          | 0           | 1             |
| AT2G07450 | 1          | 0           | 1             |
| AT2G07650 | 1          | 0           | 1             |
| AT2G07660 | 1          | 0           | 1             |
| AT2G07697 | 1          | 0           | 1             |
| AT2G07730 | 1          | 0           | 1             |
| AT2G07750 | 1          | 0           | 1             |
| AT2G07770 | 1          | 0           | 1             |
| AT2G07772 | 1          | 0           | 1             |
| AT2G09880 | 1          | 0           | 1             |
| AT2G09890 | 1          | 0           | 1             |
| AT2G09910 | 1          | 0           | 1             |

Appendix Table S3

| Name      | BES_target | BZR1_target | BESBZR_target |
|-----------|------------|-------------|---------------|
| AT2G10160 | 1          | 0           | 1             |
| AT2G10250 | 1          | 0           | 1             |
| AT2G10320 | 1          | 0           | 1             |
| AT2G10490 | 1          | 0           | 1             |
| AT2G10880 | 1          | 0           | 1             |
| AT2G10930 | 0          | 1           | 1             |
| AT2G10940 | 0          | 1           | 1             |
| AT2G11060 | 1          | 0           | 1             |
| AT2G11070 | 1          | 0           | 1             |
| AT2G11230 | 1          | 0           | 1             |
| AT2G11290 | 1          | 0           | 1             |
| AT2G11310 | 1          | 0           | 1             |
| AT2G11507 | 1          | 0           | 1             |
| AT2G11520 | 1          | 0           | 1             |
| AT2G11620 | 1          | 0           | 1             |
| AT2G11630 | 1          | 0           | 1             |
| AT2G11770 | 1          | 0           | 1             |
| AT2G11790 | 1          | 0           | 1             |
| AT2G12020 | 1          | 0           | 1             |
| AT2G12460 | 0          | 1           | 1             |
| AT2G12462 | 1          | 1           | 1             |
| AT2G12465 | 0          | 1           | 1             |
| AT2G12500 | 1          | 0           | 1             |
| AT2G12510 | 1          | 0           | 1             |
| AT2G12930 | 1          | 0           | 1             |
| AT2G13040 | 1          | 0           | 1             |
| AT2G13150 | 1          | 0           | 1             |
| AT2G13850 | 1          | 0           | 1             |
| AT2G13890 | 1          | 0           | 1             |
| AT2G14200 | 0          | 1           | 1             |
| AT2G14210 | 1          | 1           | 1             |
| AT2G14850 | 1          | 0           | 1             |
| AT2G14970 | 1          | 0           | 1             |
| AT2G15070 | 0          | 1           | 1             |
| AT2G15080 | 0          | 1           | 1             |
| AT2G15090 | 0          | 1           | 1             |
| AT2G15390 | 1          | 1           | 1             |
| AT2G15400 | 0          | 1           | 1             |
| AT2G15470 | 0          | 1           | 1             |
| AT2G15480 | 1          | 1           | 1             |
| AT2G15490 | 1          | 1           | 1             |
| AT2G15820 | 0          | 1           | 1             |
| AT2G15830 | 0          | 1           | 1             |
| AT2G15840 | 0          | 1           | 1             |
| AT2G15920 | 1          | 0           | 1             |
| AT2G16240 | 0          | 1           | 1             |
| AT2G16245 | 0          | 1           | 1             |
| AT2G16595 | 0          | 1           | 1             |
| AT2G16600 | 0          | 1           | 1             |
| AT2G16610 | 0          | 1           | 1             |
| AT2G16640 | 1          | 1           | 1             |

Appendix Table S3

| Name      | BES_target | BZR1_target | BESBZR_target |
|-----------|------------|-------------|---------------|
| AT2G16650 | 0          | 1           | 1             |
| AT2G16660 | 0          | 1           | 1             |
| AT2G16670 | 1          | 1           | 1             |
| AT2G16690 | 0          | 1           | 1             |
| AT2G16700 | 0          | 1           | 1             |
| AT2G16710 | 0          | 1           | 1             |
| AT2G16720 | 1          | 1           | 1             |
| AT2G16730 | 0          | 1           | 1             |
| AT2G16870 | 1          | 0           | 1             |
| AT2G16930 | 1          | 0           | 1             |
| AT2G17036 | 0          | 1           | 1             |
| AT2G17040 | 0          | 1           | 1             |
| AT2G17220 | 0          | 1           | 1             |
| AT2G17230 | 0          | 1           | 1             |
| AT2G17350 | 1          | 0           | 1             |
| AT2G17360 | 1          | 0           | 1             |
| AT2G17450 | 0          | 1           | 1             |
| AT2G17460 | 0          | 1           | 1             |
| AT2G17490 | 0          | 1           | 1             |
| AT2G17500 | 0          | 1           | 1             |
| AT2G17705 | 0          | 1           | 1             |
| AT2G17710 | 0          | 1           | 1             |
| AT2G17740 | 1          | 0           | 1             |
| AT2G17790 | 1          | 0           | 1             |
| AT2G17830 | 1          | 0           | 1             |
| AT2G17870 | 1          | 0           | 1             |
| AT2G18090 | 1          | 0           | 1             |
| AT2G18300 | 0          | 1           | 1             |
| AT2G18310 | 0          | 1           | 1             |
| AT2G18690 | 0          | 1           | 1             |
| AT2G18700 | 0          | 1           | 1             |
| AT2G18780 | 0          | 1           | 1             |
| AT2G18790 | 0          | 1           | 1             |
| AT2G18950 | 0          | 1           | 1             |
| AT2G18960 | 1          | 1           | 1             |
| AT2G18970 | 0          | 1           | 1             |
| AT2G19150 | 1          | 0           | 1             |
| AT2G19180 | 1          | 0           | 1             |
| AT2G19200 | 1          | 0           | 1             |
| AT2G19780 | 1          | 1           | 1             |
| AT2G19790 | 0          | 1           | 1             |
| AT2G20340 | 0          | 1           | 1             |
| AT2G20350 | 1          | 1           | 1             |
| AT2G20370 | 1          | 0           | 1             |
| AT2G20480 | 1          | 0           | 1             |
| AT2G20490 | 1          | 0           | 1             |
| AT2G20515 | 1          | 1           | 1             |
| AT2G20520 | 0          | 1           | 1             |
| AT2G20562 | 0          | 1           | 1             |
| AT2G20570 | 0          | 1           | 1             |
| AT2G20580 | 0          | 1           | 1             |



Appendix Table S3

| Name      | BES_target | BZR1_target | BESBZR_target |
|-----------|------------|-------------|---------------|
| AT2G20780 | 1          | 0           | 1             |
| AT2G20830 | 0          | 1           | 1             |
| AT2G20835 | 0          | 1           | 1             |
| AT2G20840 | 0          | 1           | 1             |
| AT2G20980 | 1          | 0           | 1             |
| AT2G21170 | 0          | 1           | 1             |
| AT2G21180 | 0          | 1           | 1             |
| AT2G21185 | 0          | 1           | 1             |
| AT2G21200 | 0          | 1           | 1             |
| AT2G21210 | 1          | 1           | 1             |
| AT2G21220 | 0          | 1           | 1             |
| AT2G21465 | 1          | 0           | 1             |
| AT2G21490 | 0          | 1           | 1             |
| AT2G21500 | 0          | 1           | 1             |
| AT2G21510 | 0          | 1           | 1             |
| AT2G21770 | 0          | 1           | 1             |
| AT2G21780 | 0          | 1           | 1             |
| AT2G22010 | 1          | 0           | 1             |
| AT2G22320 | 0          | 1           | 1             |
| AT2G22330 | 1          | 1           | 1             |
| AT2G22335 | 0          | 1           | 1             |
| AT2G22425 | 0          | 1           | 1             |
| AT2G22430 | 0          | 1           | 1             |
| AT2G22490 | 0          | 1           | 1             |
| AT2G22500 | 0          | 1           | 1             |
| AT2G22510 | 0          | 1           | 1             |
| AT2G22590 | 1          | 0           | 1             |
| AT2G22668 | 0          | 1           | 1             |
| AT2G22670 | 0          | 1           | 1             |
| AT2G22805 | 1          | 0           | 1             |
| AT2G22820 | 0          | 1           | 1             |
| AT2G22830 | 0          | 1           | 1             |
| AT2G22850 | 0          | 1           | 1             |
| AT2G22860 | 0          | 1           | 1             |
| AT2G22980 | 0          | 1           | 1             |
| AT2G22990 | 1          | 1           | 1             |
| AT2G23060 | 1          | 0           | 1             |
| AT2G23100 | 1          | 0           | 1             |
| AT2G23120 | 0          | 1           | 1             |
| AT2G23130 | 0          | 1           | 1             |
| AT2G23170 | 0          | 1           | 1             |
| AT2G23180 | 0          | 1           | 1             |
| AT2G23290 | 0          | 1           | 1             |
| AT2G23300 | 0          | 1           | 1             |
| AT2G23310 | 0          | 1           | 1             |
| AT2G23320 | 0          | 1           | 1             |
| AT2G23330 | 0          | 1           | 1             |
| AT2G23430 | 1          | 0           | 1             |
| AT2G23450 | 0          | 1           | 1             |
| AT2G23460 | 1          | 1           | 1             |
| AT2G23680 | 0          | 1           | 1             |

Appendix Table S3

| Name      | BES_target | BZR1_target | BESBZR_target |
|-----------|------------|-------------|---------------|
| AT2G23690 | 0          | 1           | 1             |
| AT2G23700 | 0          | 1           | 1             |
| AT2G23760 | 0          | 1           | 1             |
| AT2G23770 | 0          | 1           | 1             |
| AT2G24150 | 0          | 1           | 1             |
| AT2G24160 | 0          | 1           | 1             |
| AT2G24165 | 0          | 1           | 1             |
| AT2G24480 | 1          | 0           | 1             |
| AT2G24560 | 0          | 1           | 1             |
| AT2G24570 | 1          | 1           | 1             |
| AT2G24580 | 0          | 1           | 1             |
| AT2G24915 | 1          | 0           | 1             |
| AT2G25090 | 1          | 0           | 1             |
| AT2G25200 | 1          | 1           | 1             |
| AT2G25210 | 0          | 1           | 1             |
| AT2G25440 | 0          | 1           | 1             |
| AT2G25450 | 0          | 1           | 1             |
| AT2G25460 | 0          | 1           | 1             |
| AT2G25470 | 0          | 1           | 1             |
| AT2G25482 | 0          | 1           | 1             |
| AT2G25490 | 0          | 1           | 1             |
| AT2G25500 | 0          | 1           | 1             |
| AT2G26200 | 1          | 0           | 1             |
| AT2G26520 | 0          | 1           | 1             |
| AT2G26530 | 0          | 1           | 1             |
| AT2G26540 | 0          | 1           | 1             |
| AT2G26560 | 0          | 1           | 1             |
| AT2G26570 | 0          | 1           | 1             |
| AT2G27050 | 0          | 1           | 1             |
| AT2G27060 | 0          | 1           | 1             |
| AT2G27315 | 0          | 1           | 1             |
| AT2G27500 | 1          | 1           | 1             |
| AT2G27505 | 0          | 1           | 1             |
| AT2G27630 | 1          | 0           | 1             |
| AT2G27690 | 0          | 1           | 1             |
| AT2G27700 | 0          | 1           | 1             |
| AT2G27770 | 0          | 1           | 1             |
| AT2G27775 | 0          | 1           | 1             |
| AT2G28053 | 0          | 1           | 1             |
| AT2G28056 | 0          | 1           | 1             |
| AT2G28060 | 0          | 1           | 1             |
| AT2G28120 | 0          | 1           | 1             |
| AT2G28130 | 1          | 1           | 1             |
| AT2G28340 | 0          | 1           | 1             |
| AT2G28350 | 0          | 1           | 1             |
| AT2G28355 | 0          | 1           | 1             |
| AT2G28360 | 0          | 1           | 1             |
| AT2G28400 | 1          | 1           | 1             |
| AT2G28405 | 0          | 1           | 1             |
| AT2G28470 | 1          | 0           | 1             |
| AT2G28630 | 1          | 0           | 1             |

Appendix Table S3

| Name      | BES_target | BZR1_target | BESBZR_target |
|-----------|------------|-------------|---------------|
| AT2G28830 | 0          | 1           | 1             |
| AT2G28840 | 0          | 1           | 1             |
| AT2G28850 | 0          | 1           | 1             |
| AT2G28900 | 0          | 1           | 1             |
| AT2G28920 | 0          | 1           | 1             |
| AT2G28930 | 0          | 1           | 1             |
| AT2G28940 | 0          | 1           | 1             |
| AT2G28950 | 0          | 1           | 1             |
| AT2G29050 | 1          | 0           | 1             |
| AT2G29080 | 1          | 0           | 1             |
| AT2G29110 | 0          | 1           | 1             |
| AT2G29120 | 0          | 1           | 1             |
| AT2G29125 | 0          | 1           | 1             |
| AT2G29210 | 1          | 0           | 1             |
| AT2G29270 | 0          | 1           | 1             |
| AT2G29280 | 1          | 1           | 1             |
| AT2G29290 | 0          | 1           | 1             |
| AT2G29380 | 0          | 1           | 1             |
| AT2G29390 | 1          | 1           | 1             |
| AT2G29400 | 1          | 1           | 1             |
| AT2G29410 | 0          | 1           | 1             |
| AT2G29500 | 1          | 0           | 1             |
| AT2G29510 | 1          | 0           | 1             |
| AT2G29560 | 1          | 0           | 1             |
| AT2G29570 | 1          | 0           | 1             |
| AT2G29650 | 1          | 0           | 1             |
| AT2G29660 | 1          | 1           | 1             |
| AT2G29670 | 0          | 1           | 1             |
| AT2G29680 | 0          | 1           | 1             |
| AT2G29970 | 0          | 1           | 1             |
| AT2G29980 | 0          | 1           | 1             |
| AT2G29990 | 0          | 1           | 1             |
| AT2G30020 | 0          | 1           | 1             |
| AT2G30040 | 0          | 1           | 1             |
| AT2G30060 | 0          | 1           | 1             |
| AT2G30070 | 1          | 1           | 1             |
| AT2G30420 | 0          | 1           | 1             |
| AT2G30430 | 0          | 1           | 1             |
| AT2G30490 | 0          | 1           | 1             |
| AT2G30500 | 0          | 1           | 1             |
| AT2G30520 | 1          | 1           | 1             |
| AT2G30530 | 1          | 1           | 1             |
| AT2G30590 | 0          | 1           | 1             |
| AT2G30600 | 0          | 1           | 1             |
| AT2G30615 | 0          | 1           | 1             |
| AT2G30650 | 1          | 0           | 1             |
| AT2G30850 | 0          | 1           | 1             |
| AT2G30860 | 0          | 1           | 1             |
| AT2G30990 | 0          | 1           | 1             |
| AT2G31005 | 1          | 1           | 1             |
| AT2G31010 | 0          | 1           | 1             |

Appendix Table S3

| Name      | BES_target | BZR1_target | BESBZR_target |
|-----------|------------|-------------|---------------|
| AT2G31082 | 0          | 1           | 1             |
| AT2G31083 | 0          | 1           | 1             |
| AT2G31230 | 0          | 1           | 1             |
| AT2G31240 | 0          | 1           | 1             |
| AT2G31380 | 0          | 1           | 1             |
| AT2G31390 | 0          | 1           | 1             |
| AT2G31400 | 0          | 1           | 1             |
| AT2G31550 | 0          | 1           | 1             |
| AT2G31560 | 0          | 1           | 1             |
| AT2G31570 | 0          | 1           | 1             |
| AT2G31580 | 0          | 1           | 1             |
| AT2G31585 | 0          | 1           | 1             |
| AT2G31590 | 0          | 1           | 1             |
| AT2G31730 | 0          | 1           | 1             |
| AT2G31740 | 0          | 1           | 1             |
| AT2G31880 | 1          | 0           | 1             |
| AT2G31920 | 1          | 0           | 1             |
| AT2G32000 | 0          | 1           | 1             |
| AT2G32010 | 0          | 1           | 1             |
| AT2G32020 | 0          | 1           | 1             |
| AT2G32080 | 0          | 1           | 1             |
| AT2G32090 | 0          | 1           | 1             |
| AT2G32100 | 0          | 1           | 1             |
| AT2G32140 | 0          | 1           | 1             |
| AT2G32150 | 0          | 1           | 1             |
| AT2G32540 | 0          | 1           | 1             |
| AT2G32550 | 0          | 1           | 1             |
| AT2G32560 | 0          | 1           | 1             |
| AT2G32580 | 0          | 1           | 1             |
| AT2G32930 | 1          | 1           | 1             |
| AT2G32940 | 0          | 1           | 1             |
| AT2G32950 | 0          | 1           | 1             |
| AT2G32960 | 0          | 1           | 1             |
| AT2G32970 | 0          | 1           | 1             |
| AT2G33020 | 1          | 0           | 1             |
| AT2G33470 | 0          | 1           | 1             |
| AT2G33480 | 0          | 1           | 1             |
| AT2G33490 | 0          | 1           | 1             |
| AT2G33707 | 0          | 1           | 1             |
| AT2G33710 | 0          | 1           | 1             |
| AT2G33720 | 0          | 1           | 1             |
| AT2G33847 | 1          | 0           | 1             |
| AT2G34060 | 0          | 1           | 1             |
| AT2G34070 | 0          | 1           | 1             |
| AT2G34080 | 0          | 1           | 1             |
| AT2G34185 | 0          | 1           | 1             |
| AT2G34190 | 1          | 1           | 1             |
| AT2G34480 | 1          | 1           | 1             |
| AT2G34490 | 1          | 1           | 1             |
| AT2G34500 | 1          | 1           | 1             |
| AT2G34640 | 1          | 1           | 1             |

Appendix Table S3

| Name      | BES_target | BZR1_target | BESBZR_target |
|-----------|------------|-------------|---------------|
| AT2G34650 | 0          | 1           | 1             |
| AT2G34710 | 1          | 0           | 1             |
| AT2G34810 | 0          | 1           | 1             |
| AT2G34820 | 1          | 1           | 1             |
| AT2G35000 | 1          | 0           | 1             |
| AT2G35200 | 0          | 1           | 1             |
| AT2G35210 | 0          | 1           | 1             |
| AT2G35460 | 0          | 1           | 1             |
| AT2G35470 | 0          | 1           | 1             |
| AT2G35480 | 0          | 1           | 1             |
| AT2G35620 | 1          | 0           | 1             |
| AT2G35640 | 0          | 1           | 1             |
| AT2G35650 | 0          | 1           | 1             |
| AT2G35660 | 0          | 1           | 1             |
| AT2G35670 | 0          | 1           | 1             |
| AT2G35810 | 0          | 1           | 1             |
| AT2G35820 | 0          | 1           | 1             |
| AT2G35880 | 1          | 0           | 1             |
| AT2G35920 | 0          | 1           | 1             |
| AT2G35930 | 0          | 1           | 1             |
| AT2G35940 | 0          | 1           | 1             |
| AT2G35945 | 0          | 1           | 1             |
| AT2G35950 | 1          | 1           | 1             |
| AT2G36050 | 0          | 1           | 1             |
| AT2G36060 | 0          | 1           | 1             |
| AT2G36210 | 0          | 1           | 1             |
| AT2G36220 | 0          | 1           | 1             |
| AT2G36230 | 0          | 1           | 1             |
| AT2G36240 | 0          | 1           | 1             |
| AT2G36310 | 0          | 1           | 1             |
| AT2G36320 | 0          | 1           | 1             |
| AT2G36325 | 0          | 1           | 1             |
| AT2G36330 | 0          | 1           | 1             |
| AT2G36340 | 0          | 1           | 1             |
| AT2G36350 | 0          | 1           | 1             |
| AT2G36590 | 0          | 1           | 1             |
| AT2G36600 | 0          | 1           | 1             |
| AT2G36620 | 0          | 1           | 1             |
| AT2G36630 | 0          | 1           | 1             |
| AT2G36760 | 0          | 1           | 1             |
| AT2G36770 | 0          | 1           | 1             |
| AT2G36780 | 0          | 1           | 1             |
| AT2G36790 | 1          | 0           | 1             |
| AT2G36792 | 1          | 0           | 1             |
| AT2G36800 | 0          | 1           | 1             |
| AT2G36810 | 0          | 1           | 1             |
| AT2G36820 | 0          | 1           | 1             |
| AT2G36830 | 0          | 1           | 1             |
| AT2G36850 | 1          | 0           | 1             |
| AT2G36960 | 0          | 1           | 1             |
| AT2G36970 | 0          | 1           | 1             |

Appendix Table S3

| Name      | BES_target | BZR1_target | BESBZR_target |
|-----------|------------|-------------|---------------|
| AT2G37170 | 1          | 1           | 1             |
| AT2G37180 | 1          | 1           | 1             |
| AT2G37440 | 1          | 0           | 1             |
| AT2G37600 | 1          | 0           | 1             |
| AT2G37710 | 0          | 1           | 1             |
| AT2G37720 | 0          | 1           | 1             |
| AT2G38000 | 0          | 1           | 1             |
| AT2G38010 | 0          | 1           | 1             |
| AT2G38040 | 1          | 0           | 1             |
| AT2G38050 | 1          | 0           | 1             |
| AT2G38110 | 0          | 1           | 1             |
| AT2G38120 | 0          | 1           | 1             |
| AT2G38130 | 0          | 1           | 1             |
| AT2G38210 | 1          | 0           | 1             |
| AT2G38230 | 0          | 1           | 1             |
| AT2G38240 | 0          | 1           | 1             |
| AT2G38250 | 0          | 1           | 1             |
| AT2G38440 | 1          | 0           | 1             |
| AT2G38790 | 0          | 1           | 1             |
| AT2G38800 | 0          | 1           | 1             |
| AT2G38820 | 1          | 0           | 1             |
| AT2G38860 | 0          | 1           | 1             |
| AT2G38870 | 0          | 1           | 1             |
| AT2G38880 | 0          | 1           | 1             |
| AT2G39000 | 0          | 1           | 1             |
| AT2G39010 | 0          | 1           | 1             |
| AT2G39200 | 1          | 1           | 1             |
| AT2G39210 | 0          | 1           | 1             |
| AT2G39220 | 0          | 1           | 1             |
| AT2G39360 | 0          | 1           | 1             |
| AT2G39370 | 0          | 1           | 1             |
| AT2G39450 | 1          | 1           | 1             |
| AT2G39460 | 0          | 1           | 1             |
| AT2G39620 | 1          | 0           | 1             |
| AT2G39650 | 0          | 1           | 1             |
| AT2G39660 | 0          | 1           | 1             |
| AT2G39700 | 0          | 1           | 1             |
| AT2G39705 | 1          | 1           | 1             |
| AT2G39710 | 1          | 1           | 1             |
| AT2G39760 | 0          | 1           | 1             |
| AT2G39770 | 0          | 1           | 1             |
| AT2G39800 | 0          | 1           | 1             |
| AT2G39805 | 0          | 1           | 1             |
| AT2G39810 | 1          | 0           | 1             |
| AT2G39860 | 1          | 1           | 1             |
| AT2G39870 | 0          | 1           | 1             |
| AT2G39975 | 0          | 1           | 1             |
| AT2G39990 | 0          | 1           | 1             |
| AT2G40000 | 0          | 1           | 1             |
| AT2G40008 | 0          | 1           | 1             |
| AT2G40090 | 0          | 1           | 1             |

Appendix Table S3

| Name      | BES_target | BZR1_target | BESBZR_target |
|-----------|------------|-------------|---------------|
| AT2G40095 | 0          | 1           | 1             |
| AT2G40100 | 0          | 1           | 1             |
| AT2G40130 | 1          | 1           | 1             |
| AT2G40270 | 0          | 1           | 1             |
| AT2G40280 | 0          | 1           | 1             |
| AT2G40450 | 0          | 1           | 1             |
| AT2G40460 | 0          | 1           | 1             |
| AT2G40610 | 0          | 1           | 1             |
| AT2G40620 | 0          | 1           | 1             |
| AT2G40630 | 0          | 1           | 1             |
| AT2G41000 | 0          | 1           | 1             |
| AT2G41010 | 0          | 1           | 1             |
| AT2G41020 | 0          | 1           | 1             |
| AT2G41090 | 0          | 1           | 1             |
| AT2G41100 | 0          | 1           | 1             |
| AT2G41110 | 0          | 1           | 1             |
| AT2G41170 | 0          | 1           | 1             |
| AT2G41178 | 0          | 1           | 1             |
| AT2G41180 | 0          | 1           | 1             |
| AT2G41220 | 0          | 1           | 1             |
| AT2G41230 | 0          | 1           | 1             |
| AT2G41240 | 0          | 1           | 1             |
| AT2G41250 | 0          | 1           | 1             |
| AT2G41290 | 1          | 0           | 1             |
| AT2G41300 | 0          | 1           | 1             |
| AT2G41310 | 0          | 1           | 1             |
| AT2G41370 | 0          | 1           | 1             |
| AT2G41420 | 1          | 1           | 1             |
| AT2G41430 | 0          | 1           | 1             |
| AT2G41440 | 0          | 1           | 1             |
| AT2G41500 | 1          | 0           | 1             |
| AT2G41630 | 0          | 1           | 1             |
| AT2G41640 | 0          | 1           | 1             |
| AT2G41650 | 0          | 1           | 1             |
| AT2G41660 | 0          | 1           | 1             |
| AT2G41670 | 0          | 1           | 1             |
| AT2G41710 | 1          | 0           | 1             |
| AT2G41860 | 0          | 1           | 1             |
| AT2G41870 | 1          | 1           | 1             |
| AT2G41880 | 0          | 1           | 1             |
| AT2G41890 | 0          | 1           | 1             |
| AT2G41900 | 1          | 1           | 1             |
| AT2G41930 | 0          | 1           | 1             |
| AT2G41940 | 1          | 1           | 1             |
| AT2G41945 | 0          | 1           | 1             |
| AT2G41980 | 0          | 1           | 1             |
| AT2G41990 | 0          | 1           | 1             |
| AT2G41997 | 0          | 1           | 1             |
| AT2G42280 | 0          | 1           | 1             |
| AT2G42290 | 0          | 1           | 1             |
| AT2G42300 | 1          | 0           | 1             |

Appendix Table S3

| Name      | BES_target | BZR1_target | BESBZR_target |
|-----------|------------|-------------|---------------|
| AT2G42430 | 0          | 1           | 1             |
| AT2G42440 | 0          | 1           | 1             |
| AT2G42570 | 0          | 1           | 1             |
| AT2G42580 | 0          | 1           | 1             |
| AT2G42600 | 0          | 1           | 1             |
| AT2G42610 | 0          | 1           | 1             |
| AT2G42620 | 1          | 1           | 1             |
| AT2G42750 | 0          | 1           | 1             |
| AT2G42760 | 0          | 1           | 1             |
| AT2G42770 | 0          | 1           | 1             |
| AT2G42800 | 0          | 1           | 1             |
| AT2G42870 | 0          | 1           | 1             |
| AT2G42880 | 0          | 1           | 1             |
| AT2G42890 | 1          | 0           | 1             |
| AT2G42940 | 0          | 1           | 1             |
| AT2G42950 | 0          | 1           | 1             |
| AT2G42955 | 0          | 1           | 1             |
| AT2G42960 | 0          | 1           | 1             |
| AT2G42970 | 0          | 1           | 1             |
| AT2G42975 | 0          | 1           | 1             |
| AT2G42980 | 0          | 1           | 1             |
| AT2G43050 | 0          | 1           | 1             |
| AT2G43060 | 1          | 1           | 1             |
| AT2G43290 | 0          | 1           | 1             |
| AT2G43300 | 0          | 1           | 1             |
| AT2G43330 | 0          | 1           | 1             |
| AT2G43340 | 0          | 1           | 1             |
| AT2G43670 | 0          | 1           | 1             |
| AT2G43680 | 0          | 1           | 1             |
| AT2G43910 | 0          | 1           | 1             |
| AT2G43920 | 0          | 1           | 1             |
| AT2G44070 | 0          | 1           | 1             |
| AT2G44080 | 0          | 1           | 1             |
| AT2G44120 | 0          | 1           | 1             |
| AT2G44130 | 1          | 0           | 1             |
| AT2G44140 | 1          | 1           | 1             |
| AT2G44150 | 1          | 0           | 1             |
| AT2G44210 | 0          | 1           | 1             |
| AT2G44220 | 0          | 1           | 1             |
| AT2G44230 | 0          | 1           | 1             |
| AT2G44360 | 0          | 1           | 1             |
| AT2G44370 | 0          | 1           | 1             |
| AT2G44380 | 0          | 1           | 1             |
| AT2G44390 | 0          | 1           | 1             |
| AT2G44490 | 0          | 1           | 1             |
| AT2G44500 | 0          | 1           | 1             |
| AT2G44660 | 1          | 1           | 1             |
| AT2G44670 | 0          | 1           | 1             |
| AT2G44760 | 0          | 1           | 1             |
| AT2G44770 | 0          | 1           | 1             |
| AT2G44910 | 1          | 1           | 1             |



Appendix Table S3

| Name      | BES_target | BZR1_target | BESBZR_target |
|-----------|------------|-------------|---------------|
| AT2G44920 | 1          | 1           | 1             |
| AT2G44930 | 0          | 1           | 1             |
| AT2G44940 | 1          | 1           | 1             |
| AT2G44950 | 0          | 1           | 1             |
| AT2G45030 | 1          | 0           | 1             |
| AT2G45070 | 0          | 1           | 1             |
| AT2G45080 | 0          | 1           | 1             |
| AT2G45160 | 0          | 1           | 1             |
| AT2G45170 | 0          | 1           | 1             |
| AT2G45180 | 0          | 1           | 1             |
| AT2G45190 | 0          | 1           | 1             |
| AT2G45200 | 0          | 1           | 1             |
| AT2G45210 | 1          | 1           | 1             |
| AT2G45230 | 1          | 0           | 1             |
| AT2G45300 | 0          | 1           | 1             |
| AT2G45310 | 1          | 1           | 1             |
| AT2G45350 | 0          | 1           | 1             |
| AT2G45360 | 1          | 1           | 1             |
| AT2G45380 | 1          | 1           | 1             |
| AT2G45390 | 0          | 1           | 1             |
| AT2G45430 | 1          | 0           | 1             |
| AT2G45490 | 1          | 0           | 1             |
| AT2G45590 | 0          | 1           | 1             |
| AT2G45600 | 1          | 1           | 1             |
| AT2G45660 | 0          | 1           | 1             |
| AT2G45670 | 0          | 1           | 1             |
| AT2G45680 | 1          | 1           | 1             |
| AT2G45690 | 0          | 1           | 1             |
| AT2G45720 | 1          | 0           | 1             |
| AT2G45830 | 1          | 0           | 1             |
| AT2G45880 | 1          | 0           | 1             |
| AT2G45900 | 0          | 1           | 1             |
| AT2G45910 | 0          | 1           | 1             |
| AT2G45950 | 1          | 1           | 1             |
| AT2G45960 | 0          | 1           | 1             |
| AT2G46060 | 1          | 0           | 1             |
| AT2G46140 | 0          | 1           | 1             |
| AT2G46150 | 0          | 1           | 1             |
| AT2G46160 | 0          | 1           | 1             |
| AT2G46210 | 1          | 1           | 1             |
| AT2G46220 | 0          | 1           | 1             |
| AT2G46225 | 1          | 1           | 1             |
| AT2G46270 | 1          | 0           | 1             |
| AT2G46300 | 0          | 1           | 1             |
| AT2G46310 | 1          | 1           | 1             |
| AT2G46320 | 0          | 1           | 1             |
| AT2G46340 | 0          | 1           | 1             |
| AT2G46360 | 0          | 1           | 1             |
| AT2G46370 | 0          | 1           | 1             |
| AT2G46380 | 1          | 0           | 1             |
| AT2G46410 | 0          | 1           | 1             |

Appendix Table S3

| Name      | BES_target | BZR1_target | BESBZR_target |
|-----------|------------|-------------|---------------|
| AT2G46420 | 0          | 1           | 1             |
| AT2G46510 | 1          | 1           | 1             |
| AT2G46520 | 1          | 1           | 1             |
| AT2G46530 | 0          | 1           | 1             |
| AT2G46660 | 1          | 1           | 1             |
| AT2G46670 | 0          | 1           | 1             |
| AT2G46680 | 0          | 1           | 1             |
| AT2G46685 | 0          | 1           | 1             |
| AT2G46710 | 0          | 1           | 1             |
| AT2G46720 | 0          | 1           | 1             |
| AT2G46730 | 1          | 1           | 1             |
| AT2G46800 | 0          | 1           | 1             |
| AT2G46810 | 0          | 1           | 1             |
| AT2G46820 | 0          | 1           | 1             |
| AT2G46850 | 0          | 1           | 1             |
| AT2G46860 | 0          | 1           | 1             |
| AT2G46870 | 0          | 1           | 1             |
| AT2G46950 | 1          | 0           | 1             |
| AT2G46970 | 1          | 1           | 1             |
| AT2G46980 | 0          | 1           | 1             |
| AT2G47000 | 1          | 1           | 1             |
| AT2G47010 | 0          | 1           | 1             |
| AT2G47060 | 0          | 1           | 1             |
| AT2G47070 | 0          | 1           | 1             |
| AT2G47160 | 0          | 1           | 1             |
| AT2G47180 | 0          | 1           | 1             |
| AT2G47190 | 0          | 1           | 1             |
| AT2G47200 | 0          | 1           | 1             |
| AT2G47230 | 1          | 0           | 1             |
| AT2G47250 | 0          | 1           | 1             |
| AT2G47260 | 0          | 1           | 1             |
| AT2G47270 | 0          | 1           | 1             |
| AT2G47330 | 1          | 0           | 1             |
| AT2G47430 | 0          | 1           | 1             |
| AT2G47440 | 0          | 1           | 1             |
| AT2G47650 | 1          | 0           | 1             |
| AT2G47720 | 0          | 1           | 1             |
| AT2G47730 | 0          | 1           | 1             |
| AT2G47980 | 1          | 0           | 1             |
| AT2G48000 | 0          | 1           | 1             |
| AT2G48010 | 0          | 1           | 1             |
| AT3G01070 | 0          | 1           | 1             |
| AT3G01080 | 0          | 1           | 1             |
| AT3G01140 | 0          | 1           | 1             |
| AT3G01150 | 0          | 1           | 1             |
| AT3G01160 | 1          | 0           | 1             |
| AT3G01460 | 1          | 0           | 1             |
| AT3G01820 | 1          | 0           | 1             |
| AT3G01830 | 1          | 0           | 1             |
| AT3G02140 | 0          | 1           | 1             |
| AT3G02150 | 0          | 1           | 1             |

Appendix Table S3

| Name      | BES_target | BZR1_target | BESBZR_target |
|-----------|------------|-------------|---------------|
| AT3G02170 | 0          | 1           | 1             |
| AT3G02180 | 0          | 1           | 1             |
| AT3G02540 | 0          | 1           | 1             |
| AT3G02550 | 1          | 1           | 1             |
| AT3G02555 | 0          | 1           | 1             |
| AT3G02560 | 0          | 1           | 1             |
| AT3G02570 | 0          | 1           | 1             |
| AT3G02580 | 0          | 1           | 1             |
| AT3G02750 | 0          | 1           | 1             |
| AT3G02760 | 0          | 1           | 1             |
| AT3G02870 | 0          | 1           | 1             |
| AT3G02875 | 0          | 1           | 1             |
| AT3G02880 | 0          | 1           | 1             |
| AT3G03310 | 1          | 0           | 1             |
| AT3G03320 | 1          | 0           | 1             |
| AT3G03620 | 1          | 0           | 1             |
| AT3G03830 | 1          | 0           | 1             |
| AT3G03840 | 1          | 0           | 1             |
| AT3G04070 | 0          | 1           | 1             |
| AT3G04080 | 0          | 1           | 1             |
| AT3G04210 | 0          | 1           | 1             |
| AT3G04220 | 0          | 1           | 1             |
| AT3G04290 | 1          | 0           | 1             |
| AT3G04360 | 1          | 0           | 1             |
| AT3G04420 | 0          | 1           | 1             |
| AT3G04430 | 0          | 1           | 1             |
| AT3G04460 | 1          | 0           | 1             |
| AT3G04470 | 0          | 1           | 1             |
| AT3G04480 | 0          | 1           | 1             |
| AT3G04605 | 1          | 0           | 1             |
| AT3G04730 | 0          | 1           | 1             |
| AT3G04735 | 0          | 1           | 1             |
| AT3G04903 | 0          | 1           | 1             |
| AT3G04910 | 0          | 1           | 1             |
| AT3G04920 | 0          | 1           | 1             |
| AT3G05030 | 0          | 1           | 1             |
| AT3G05040 | 0          | 1           | 1             |
| AT3G05110 | 0          | 1           | 1             |
| AT3G05120 | 0          | 1           | 1             |
| AT3G05190 | 0          | 1           | 1             |
| AT3G05200 | 0          | 1           | 1             |
| AT3G05210 | 0          | 1           | 1             |
| AT3G05220 | 0          | 1           | 1             |
| AT3G05320 | 1          | 1           | 1             |
| AT3G05327 | 0          | 1           | 1             |
| AT3G05415 | 1          | 0           | 1             |
| AT3G05480 | 0          | 1           | 1             |
| AT3G05490 | 0          | 1           | 1             |
| AT3G05500 | 1          | 0           | 1             |
| AT3G05600 | 1          | 0           | 1             |
| AT3G05640 | 1          | 1           | 1             |

Appendix Table S3

| Name      | BES_target | BZR1_target | BESBZR_target |
|-----------|------------|-------------|---------------|
| AT3G05650 | 0          | 1           | 1             |
| AT3G05660 | 1          | 1           | 1             |
| AT3G05670 | 1          | 1           | 1             |
| AT3G05690 | 0          | 1           | 1             |
| AT3G05700 | 0          | 1           | 1             |
| AT3G05800 | 0          | 1           | 1             |
| AT3G05810 | 1          | 1           | 1             |
| AT3G05900 | 0          | 1           | 1             |
| AT3G05910 | 0          | 1           | 1             |
| AT3G05920 | 0          | 1           | 1             |
| AT3G05935 | 0          | 1           | 1             |
| AT3G05937 | 0          | 1           | 1             |
| AT3G06030 | 0          | 1           | 1             |
| AT3G06060 | 0          | 1           | 1             |
| AT3G06070 | 0          | 1           | 1             |
| AT3G06080 | 1          | 1           | 1             |
| AT3G06090 | 0          | 1           | 1             |
| AT3G06125 | 0          | 1           | 1             |
| AT3G06130 | 0          | 1           | 1             |
| AT3G06140 | 0          | 1           | 1             |
| AT3G06300 | 1          | 0           | 1             |
| AT3G06410 | 0          | 1           | 1             |
| AT3G06420 | 0          | 1           | 1             |
| AT3G06433 | 1          | 0           | 1             |
| AT3G06490 | 0          | 1           | 1             |
| AT3G06500 | 1          | 1           | 1             |
| AT3G06550 | 0          | 1           | 1             |
| AT3G06560 | 0          | 1           | 1             |
| AT3G06740 | 0          | 1           | 1             |
| AT3G06750 | 0          | 1           | 1             |
| AT3G06760 | 1          | 1           | 1             |
| AT3G06860 | 0          | 1           | 1             |
| AT3G06870 | 0          | 1           | 1             |
| AT3G06880 | 0          | 1           | 1             |
| AT3G06890 | 0          | 1           | 1             |
| AT3G07310 | 0          | 1           | 1             |
| AT3G07320 | 1          | 1           | 1             |
| AT3G07350 | 1          | 1           | 1             |
| AT3G07360 | 1          | 1           | 1             |
| AT3G07380 | 0          | 1           | 1             |
| AT3G07390 | 0          | 1           | 1             |
| AT3G07460 | 1          | 1           | 1             |
| AT3G07470 | 0          | 1           | 1             |
| AT3G07540 | 0          | 1           | 1             |
| AT3G07550 | 0          | 1           | 1             |
| AT3G08020 | 1          | 1           | 1             |
| AT3G08030 | 1          | 1           | 1             |
| AT3G08620 | 0          | 1           | 1             |
| AT3G08630 | 0          | 1           | 1             |
| AT3G08640 | 0          | 1           | 1             |
| AT3G08650 | 0          | 1           | 1             |

Appendix Table S3

| Name      | BES_target | BZR1_target | BESBZR_target |
|-----------|------------|-------------|---------------|
| AT3G08660 | 0          | 1           | 1             |
| AT3G08760 | 0          | 1           | 1             |
| AT3G08770 | 0          | 1           | 1             |
| AT3G09032 | 0          | 1           | 1             |
| AT3G09040 | 0          | 1           | 1             |
| AT3G09530 | 0          | 1           | 1             |
| AT3G09540 | 0          | 1           | 1             |
| AT3G09560 | 1          | 0           | 1             |
| AT3G09570 | 1          | 0           | 1             |
| AT3G09590 | 1          | 0           | 1             |
| AT3G09595 | 0          | 1           | 1             |
| AT3G09600 | 0          | 1           | 1             |
| AT3G10020 | 0          | 1           | 1             |
| AT3G10030 | 0          | 1           | 1             |
| AT3G10035 | 0          | 1           | 1             |
| AT3G10040 | 0          | 1           | 1             |
| AT3G10050 | 0          | 1           | 1             |
| AT3G10100 | 1          | 0           | 1             |
| AT3G10113 | 1          | 0           | 1             |
| AT3G10116 | 0          | 1           | 1             |
| AT3G10120 | 0          | 1           | 1             |
| AT3G10330 | 1          | 0           | 1             |
| AT3G10720 | 1          | 1           | 1             |
| AT3G10730 | 0          | 1           | 1             |
| AT3G10980 | 0          | 1           | 1             |
| AT3G10985 | 0          | 1           | 1             |
| AT3G10990 | 0          | 1           | 1             |
| AT3G11130 | 1          | 0           | 1             |
| AT3G11150 | 1          | 0           | 1             |
| AT3G11160 | 0          | 1           | 1             |
| AT3G11170 | 0          | 1           | 1             |
| AT3G11350 | 1          | 0           | 1             |
| AT3G11410 | 0          | 1           | 1             |
| AT3G11420 | 0          | 1           | 1             |
| AT3G11430 | 0          | 1           | 1             |
| AT3G11470 | 0          | 1           | 1             |
| AT3G11480 | 0          | 1           | 1             |
| AT3G11650 | 0          | 1           | 1             |
| AT3G11660 | 0          | 1           | 1             |
| AT3G11680 | 1          | 1           | 1             |
| AT3G11690 | 1          | 1           | 1             |
| AT3G11700 | 0          | 1           | 1             |
| AT3G11710 | 0          | 1           | 1             |
| AT3G11770 | 1          | 0           | 1             |
| AT3G12110 | 0          | 1           | 1             |
| AT3G12120 | 1          | 1           | 1             |
| AT3G12130 | 0          | 1           | 1             |
| AT3G12143 | 0          | 1           | 1             |
| AT3G12145 | 0          | 1           | 1             |
| AT3G12150 | 0          | 1           | 1             |
| AT3G12160 | 0          | 1           | 1             |

Appendix Table S3

| Name      | BES_target | BZR1_target | BESBZR_target |
|-----------|------------|-------------|---------------|
| AT3G12220 | 0          | 1           | 1             |
| AT3G12230 | 0          | 1           | 1             |
| AT3G12240 | 0          | 1           | 1             |
| AT3G12280 | 1          | 0           | 1             |
| AT3G12290 | 1          | 0           | 1             |
| AT3G12300 | 1          | 0           | 1             |
| AT3G12320 | 1          | 0           | 1             |
| AT3G12560 | 1          | 0           | 1             |
| AT3G12610 | 0          | 1           | 1             |
| AT3G12620 | 0          | 1           | 1             |
| AT3G12900 | 0          | 1           | 1             |
| AT3G12910 | 0          | 1           | 1             |
| AT3G12915 | 0          | 1           | 1             |
| AT3G12920 | 0          | 1           | 1             |
| AT3G12930 | 0          | 1           | 1             |
| AT3G13040 | 1          | 0           | 1             |
| AT3G13062 | 1          | 0           | 1             |
| AT3G13065 | 1          | 0           | 1             |
| AT3G13110 | 0          | 1           | 1             |
| AT3G13120 | 0          | 1           | 1             |
| AT3G13220 | 1          | 0           | 1             |
| AT3G13310 | 0          | 1           | 1             |
| AT3G13320 | 0          | 1           | 1             |
| AT3G13370 | 0          | 1           | 1             |
| AT3G13380 | 1          | 1           | 1             |
| AT3G13430 | 1          | 0           | 1             |
| AT3G13500 | 0          | 1           | 1             |
| AT3G13510 | 0          | 1           | 1             |
| AT3G13520 | 0          | 1           | 1             |
| AT3G13525 | 0          | 1           | 1             |
| AT3G13560 | 1          | 0           | 1             |
| AT3G13640 | 1          | 1           | 1             |
| AT3G13650 | 0          | 1           | 1             |
| AT3G13720 | 0          | 1           | 1             |
| AT3G13730 | 1          | 1           | 1             |
| AT3G13740 | 0          | 1           | 1             |
| AT3G13750 | 0          | 1           | 1             |
| AT3G13784 | 0          | 1           | 1             |
| AT3G13790 | 0          | 1           | 1             |
| AT3G13800 | 0          | 1           | 1             |
| AT3G13810 | 0          | 1           | 1             |
| AT3G13880 | 1          | 0           | 1             |
| AT3G13970 | 1          | 1           | 1             |
| AT3G13980 | 0          | 1           | 1             |
| AT3G13990 | 1          | 0           | 1             |
| AT3G14050 | 1          | 1           | 1             |
| AT3G14060 | 0          | 1           | 1             |
| AT3G14067 | 1          | 0           | 1             |
| AT3G14180 | 1          | 0           | 1             |
| AT3G14200 | 1          | 1           | 1             |
| AT3G14205 | 0          | 1           | 1             |

Appendix Table S3

| Name      | BES_target | BZR1_target | BESBZR_target |
|-----------|------------|-------------|---------------|
| AT3G14210 | 0          | 1           | 1             |
| AT3G14230 | 0          | 1           | 1             |
| AT3G14240 | 0          | 1           | 1             |
| AT3G14300 | 0          | 1           | 1             |
| AT3G14310 | 0          | 1           | 1             |
| AT3G14320 | 0          | 1           | 1             |
| AT3G14430 | 1          | 1           | 1             |
| AT3G14440 | 1          | 1           | 1             |
| AT3G14450 | 0          | 1           | 1             |
| AT3G14730 | 1          | 0           | 1             |
| AT3G14770 | 1          | 0           | 1             |
| AT3G14840 | 0          | 1           | 1             |
| AT3G14850 | 0          | 1           | 1             |
| AT3G14855 | 0          | 1           | 1             |
| AT3G14860 | 0          | 1           | 1             |
| AT3G14870 | 0          | 1           | 1             |
| AT3G14880 | 0          | 1           | 1             |
| AT3G15010 | 0          | 1           | 1             |
| AT3G15020 | 0          | 1           | 1             |
| AT3G15030 | 0          | 1           | 1             |
| AT3G15040 | 0          | 1           | 1             |
| AT3G15050 | 0          | 1           | 1             |
| AT3G15090 | 0          | 1           | 1             |
| AT3G15095 | 1          | 1           | 1             |
| AT3G15140 | 1          | 0           | 1             |
| AT3G15160 | 1          | 0           | 1             |
| AT3G15200 | 0          | 1           | 1             |
| AT3G15210 | 0          | 1           | 1             |
| AT3G15220 | 1          | 1           | 1             |
| AT3G15270 | 0          | 1           | 1             |
| AT3G15350 | 1          | 0           | 1             |
| AT3G15460 | 1          | 0           | 1             |
| AT3G15490 | 0          | 1           | 1             |
| AT3G15500 | 0          | 1           | 1             |
| AT3G15510 | 0          | 1           | 1             |
| AT3G15530 | 0          | 1           | 1             |
| AT3G15540 | 0          | 1           | 1             |
| AT3G15570 | 1          | 1           | 1             |
| AT3G15580 | 0          | 1           | 1             |
| AT3G15630 | 0          | 1           | 1             |
| AT3G15640 | 0          | 1           | 1             |
| AT3G15760 | 0          | 1           | 1             |
| AT3G15770 | 0          | 1           | 1             |
| AT3G15840 | 0          | 1           | 1             |
| AT3G15850 | 0          | 1           | 1             |
| AT3G16050 | 1          | 0           | 1             |
| AT3G16175 | 0          | 1           | 1             |
| AT3G16180 | 0          | 1           | 1             |
| AT3G16190 | 0          | 1           | 1             |
| AT3G16500 | 0          | 1           | 1             |
| AT3G16510 | 0          | 1           | 1             |

Appendix Table S3

| Name      | BES_target | BZR1_target | BESBZR_target |
|-----------|------------|-------------|---------------|
| AT3G16570 | 0          | 1           | 1             |
| AT3G16580 | 0          | 1           | 1             |
| AT3G16610 | 1          | 0           | 1             |
| AT3G16630 | 1          | 0           | 1             |
| AT3G16720 | 0          | 1           | 1             |
| AT3G16730 | 0          | 1           | 1             |
| AT3G16770 | 0          | 1           | 1             |
| AT3G16780 | 0          | 1           | 1             |
| AT3G16785 | 0          | 1           | 1             |
| AT3G16800 | 0          | 1           | 1             |
| AT3G16820 | 0          | 1           | 1             |
| AT3G16830 | 1          | 1           | 1             |
| AT3G16860 | 0          | 1           | 1             |
| AT3G16870 | 0          | 1           | 1             |
| AT3G17100 | 1          | 1           | 1             |
| AT3G17110 | 0          | 1           | 1             |
| AT3G17120 | 0          | 1           | 1             |
| AT3G17360 | 1          | 0           | 1             |
| AT3G17450 | 0          | 1           | 1             |
| AT3G17510 | 0          | 1           | 1             |
| AT3G17520 | 0          | 1           | 1             |
| AT3G17640 | 1          | 0           | 1             |
| AT3G18000 | 0          | 1           | 1             |
| AT3G18040 | 1          | 0           | 1             |
| AT3G18070 | 0          | 1           | 1             |
| AT3G18080 | 1          | 1           | 1             |
| AT3G18485 | 0          | 1           | 1             |
| AT3G18490 | 0          | 1           | 1             |
| AT3G18524 | 1          | 0           | 1             |
| AT3G18710 | 1          | 0           | 1             |
| AT3G18830 | 0          | 1           | 1             |
| AT3G18840 | 0          | 1           | 1             |
| AT3G18940 | 0          | 1           | 1             |
| AT3G18950 | 0          | 1           | 1             |
| AT3G19000 | 1          | 0           | 1             |
| AT3G19030 | 0          | 1           | 1             |
| AT3G19040 | 0          | 1           | 1             |
| AT3G19050 | 1          | 0           | 1             |
| AT3G19184 | 0          | 1           | 1             |
| AT3G19190 | 0          | 1           | 1             |
| AT3G19270 | 0          | 1           | 1             |
| AT3G19280 | 0          | 1           | 1             |
| AT3G19370 | 0          | 1           | 1             |
| AT3G19380 | 1          | 1           | 1             |
| AT3G19390 | 1          | 1           | 1             |
| AT3G19430 | 1          | 0           | 1             |
| AT3G19530 | 0          | 1           | 1             |
| AT3G19540 | 0          | 1           | 1             |
| AT3G19550 | 0          | 1           | 1             |
| AT3G19590 | 1          | 0           | 1             |
| AT3G19670 | 0          | 1           | 1             |



Appendix Table S3

| Name      | BES_target | BZR1_target | BESBZR_target |
|-----------|------------|-------------|---------------|
| AT3G19680 | 1          | 1           | 1             |
| AT3G19690 | 0          | 1           | 1             |
| AT3G19700 | 0          | 1           | 1             |
| AT3G19850 | 0          | 1           | 1             |
| AT3G19860 | 0          | 1           | 1             |
| AT3G19895 | 1          | 0           | 1             |
| AT3G19920 | 0          | 1           | 1             |
| AT3G19930 | 0          | 1           | 1             |
| AT3G19940 | 0          | 1           | 1             |
| AT3G20340 | 0          | 1           | 1             |
| AT3G20350 | 0          | 1           | 1             |
| AT3G20420 | 1          | 0           | 1             |
| AT3G20655 | 0          | 1           | 1             |
| AT3G20660 | 0          | 1           | 1             |
| AT3G20670 | 0          | 1           | 1             |
| AT3G20810 | 0          | 1           | 1             |
| AT3G20820 | 1          | 1           | 1             |
| AT3G20830 | 1          | 1           | 1             |
| AT3G21050 | 1          | 0           | 1             |
| AT3G21070 | 1          | 1           | 1             |
| AT3G21080 | 0          | 1           | 1             |
| AT3G21090 | 1          | 0           | 1             |
| AT3G21100 | 1          | 0           | 1             |
| AT3G21140 | 0          | 1           | 1             |
| AT3G21150 | 0          | 1           | 1             |
| AT3G21160 | 0          | 1           | 1             |
| AT3G21210 | 1          | 0           | 1             |
| AT3G21230 | 1          | 1           | 1             |
| AT3G21240 | 0          | 1           | 1             |
| AT3G21270 | 1          | 0           | 1             |
| AT3G21320 | 1          | 1           | 1             |
| AT3G21330 | 0          | 1           | 1             |
| AT3G21350 | 0          | 1           | 1             |
| AT3G21352 | 0          | 1           | 1             |
| AT3G21420 | 0          | 1           | 1             |
| AT3G21430 | 0          | 1           | 1             |
| AT3G21660 | 1          | 0           | 1             |
| AT3G21670 | 1          | 0           | 1             |
| AT3G21740 | 0          | 1           | 1             |
| AT3G21750 | 1          | 1           | 1             |
| AT3G21755 | 0          | 1           | 1             |
| AT3G21790 | 1          | 0           | 1             |
| AT3G21820 | 1          | 0           | 1             |
| AT3G21865 | 1          | 0           | 1             |
| AT3G21870 | 1          | 0           | 1             |
| AT3G22057 | 0          | 1           | 1             |
| AT3G22060 | 0          | 1           | 1             |
| AT3G22070 | 0          | 1           | 1             |
| AT3G22120 | 0          | 1           | 1             |
| AT3G22133 | 0          | 1           | 1             |
| AT3G22370 | 0          | 1           | 1             |

Appendix Table S3

| Name      | BES_target | BZR1_target | BESBZR_target |
|-----------|------------|-------------|---------------|
| AT3G22380 | 1          | 1           | 1             |
| AT3G22400 | 0          | 1           | 1             |
| AT3G22410 | 0          | 1           | 1             |
| AT3G22415 | 0          | 1           | 1             |
| AT3G22690 | 1          | 0           | 1             |
| AT3G22790 | 1          | 0           | 1             |
| AT3G22886 | 0          | 1           | 1             |
| AT3G23020 | 0          | 1           | 1             |
| AT3G23030 | 0          | 1           | 1             |
| AT3G23040 | 1          | 1           | 1             |
| AT3G23050 | 1          | 1           | 1             |
| AT3G23060 | 0          | 1           | 1             |
| AT3G23085 | 1          | 0           | 1             |
| AT3G23210 | 0          | 1           | 1             |
| AT3G23220 | 0          | 1           | 1             |
| AT3G23245 | 0          | 1           | 1             |
| AT3G23250 | 1          | 1           | 1             |
| AT3G23400 | 1          | 1           | 1             |
| AT3G23410 | 0          | 1           | 1             |
| AT3G23550 | 0          | 1           | 1             |
| AT3G23560 | 0          | 1           | 1             |
| AT3G23810 | 0          | 1           | 1             |
| AT3G23820 | 0          | 1           | 1             |
| AT3G23890 | 1          | 0           | 1             |
| AT3G23910 | 0          | 1           | 1             |
| AT3G23920 | 0          | 1           | 1             |
| AT3G23990 | 1          | 0           | 1             |
| AT3G24040 | 0          | 1           | 1             |
| AT3G24050 | 0          | 1           | 1             |
| AT3G24060 | 0          | 1           | 1             |
| AT3G24180 | 0          | 1           | 1             |
| AT3G24190 | 0          | 1           | 1             |
| AT3G24220 | 1          | 0           | 1             |
| AT3G24420 | 0          | 1           | 1             |
| AT3G24430 | 0          | 1           | 1             |
| AT3G24490 | 0          | 1           | 1             |
| AT3G24500 | 0          | 1           | 1             |
| AT3G24503 | 0          | 1           | 1             |
| AT3G24506 | 0          | 1           | 1             |
| AT3G24517 | 0          | 1           | 1             |
| AT3G24518 | 0          | 1           | 1             |
| AT3G24520 | 0          | 1           | 1             |
| AT3G24530 | 0          | 1           | 1             |
| AT3G24570 | 1          | 0           | 1             |
| AT3G24810 | 1          | 0           | 1             |
| AT3G25060 | 0          | 1           | 1             |
| AT3G25070 | 0          | 1           | 1             |
| AT3G25450 | 1          | 0           | 1             |
| AT3G25680 | 0          | 1           | 1             |
| AT3G25690 | 0          | 1           | 1             |
| AT3G25715 | 0          | 1           | 1             |

Appendix Table S3

| Name      | BES_target | BZR1_target | BESBZR_target |
|-----------|------------|-------------|---------------|
| AT3G25717 | 1          | 1           | 1             |
| AT3G25720 | 0          | 1           | 1             |
| AT3G25727 | 0          | 1           | 1             |
| AT3G25730 | 0          | 1           | 1             |
| AT3G25760 | 0          | 1           | 1             |
| AT3G25770 | 0          | 1           | 1             |
| AT3G25780 | 1          | 1           | 1             |
| AT3G25870 | 0          | 1           | 1             |
| AT3G25880 | 0          | 1           | 1             |
| AT3G25890 | 0          | 1           | 1             |
| AT3G25900 | 0          | 1           | 1             |
| AT3G25920 | 1          | 0           | 1             |
| AT3G26200 | 0          | 1           | 1             |
| AT3G26210 | 0          | 1           | 1             |
| AT3G26220 | 0          | 1           | 1             |
| AT3G26430 | 0          | 1           | 1             |
| AT3G26440 | 0          | 1           | 1             |
| AT3G26500 | 0          | 1           | 1             |
| AT3G26510 | 1          | 1           | 1             |
| AT3G26520 | 0          | 1           | 1             |
| AT3G26530 | 0          | 1           | 1             |
| AT3G26540 | 0          | 1           | 1             |
| AT3G26810 | 1          | 0           | 1             |
| AT3G26980 | 1          | 0           | 1             |
| AT3G27160 | 0          | 1           | 1             |
| AT3G27170 | 0          | 1           | 1             |
| AT3G27210 | 1          | 0           | 1             |
| AT3G27250 | 0          | 1           | 1             |
| AT3G27260 | 1          | 1           | 1             |
| AT3G27800 | 0          | 1           | 1             |
| AT3G27810 | 0          | 1           | 1             |
| AT3G27960 | 0          | 1           | 1             |
| AT3G27965 | 0          | 1           | 1             |
| AT3G28050 | 1          | 0           | 1             |
| AT3G28170 | 0          | 1           | 1             |
| AT3G28180 | 0          | 1           | 1             |
| AT3G28190 | 0          | 1           | 1             |
| AT3G28240 | 1          | 0           | 1             |
| AT3G28380 | 1          | 0           | 1             |
| AT3G28910 | 1          | 0           | 1             |
| AT3G29480 | 1          | 0           | 1             |
| AT3G29575 | 1          | 0           | 1             |
| AT3G29641 | 1          | 0           | 1             |
| AT3G29725 | 1          | 0           | 1             |
| AT3G30170 | 1          | 1           | 1             |
| AT3G30180 | 0          | 1           | 1             |
| AT3G30413 | 1          | 0           | 1             |
| AT3G30416 | 1          | 0           | 1             |
| AT3G30418 | 1          | 0           | 1             |
| AT3G30718 | 1          | 0           | 1             |
| AT3G30775 | 0          | 1           | 1             |

Appendix Table S3

| Name      | BES_target | BZR1_target | BESBZR_target |
|-----------|------------|-------------|---------------|
| AT3G30780 | 1          | 1           | 1             |
| AT3G30790 | 1          | 0           | 1             |
| AT3G30844 | 1          | 0           | 1             |
| AT3G31356 | 1          | 0           | 1             |
| AT3G31530 | 1          | 0           | 1             |
| AT3G32060 | 1          | 0           | 1             |
| AT3G32205 | 1          | 0           | 1             |
| AT3G32210 | 1          | 0           | 1             |
| AT3G32230 | 1          | 0           | 1             |
| AT3G32250 | 1          | 0           | 1             |
| AT3G32475 | 1          | 0           | 1             |
| AT3G32912 | 1          | 0           | 1             |
| AT3G33071 | 1          | 0           | 1             |
| AT3G33189 | 1          | 0           | 1             |
| AT3G33572 | 1          | 0           | 1             |
| AT3G39230 | 1          | 0           | 1             |
| AT3G42130 | 1          | 0           | 1             |
| AT3G42256 | 1          | 0           | 1             |
| AT3G42313 | 1          | 0           | 1             |
| AT3G42445 | 1          | 0           | 1             |
| AT3G42473 | 1          | 0           | 1             |
| AT3G42478 | 1          | 0           | 1             |
| AT3G42670 | 1          | 0           | 1             |
| AT3G42730 | 1          | 0           | 1             |
| AT3G43080 | 1          | 0           | 1             |
| AT3G43152 | 1          | 0           | 1             |
| AT3G43210 | 1          | 0           | 1             |
| AT3G43352 | 1          | 0           | 1             |
| AT3G43430 | 0          | 1           | 1             |
| AT3G43433 | 0          | 1           | 1             |
| AT3G44300 | 0          | 1           | 1             |
| AT3G44310 | 0          | 1           | 1             |
| AT3G44410 | 1          | 0           | 1             |
| AT3G44420 | 1          | 0           | 1             |
| AT3G44450 | 0          | 1           | 1             |
| AT3G44460 | 0          | 1           | 1             |
| AT3G44620 | 1          | 0           | 1             |
| AT3G44796 | 1          | 0           | 1             |
| AT3G45040 | 1          | 0           | 1             |
| AT3G45130 | 0          | 1           | 1             |
| AT3G45140 | 0          | 1           | 1             |
| AT3G45170 | 1          | 0           | 1             |
| AT3G45190 | 1          | 0           | 1             |
| AT3G45260 | 0          | 1           | 1             |
| AT3G45270 | 0          | 1           | 1             |
| AT3G45330 | 1          | 0           | 1             |
| AT3G45350 | 1          | 0           | 1             |
| AT3G45370 | 1          | 0           | 1             |
| AT3G45420 | 1          | 0           | 1             |
| AT3G45555 | 1          | 0           | 1             |
| AT3G45640 | 0          | 1           | 1             |

Appendix Table S3

| Name      | BES_target | BZR1_target | BESBZR_target |
|-----------|------------|-------------|---------------|
| AT3G45650 | 0          | 1           | 1             |
| AT3G45775 | 0          | 1           | 1             |
| AT3G45780 | 0          | 1           | 1             |
| AT3G45790 | 1          | 0           | 1             |
| AT3G45840 | 1          | 0           | 1             |
| AT3G45860 | 0          | 1           | 1             |
| AT3G45870 | 0          | 1           | 1             |
| AT3G46090 | 0          | 1           | 1             |
| AT3G46100 | 0          | 1           | 1             |
| AT3G46280 | 0          | 1           | 1             |
| AT3G46290 | 0          | 1           | 1             |
| AT3G46540 | 1          | 1           | 1             |
| AT3G46550 | 0          | 1           | 1             |
| AT3G46620 | 0          | 1           | 1             |
| AT3G46630 | 0          | 1           | 1             |
| AT3G46700 | 0          | 1           | 1             |
| AT3G46710 | 0          | 1           | 1             |
| AT3G47200 | 0          | 1           | 1             |
| AT3G47210 | 0          | 1           | 1             |
| AT3G47230 | 1          | 0           | 1             |
| AT3G47420 | 0          | 1           | 1             |
| AT3G47430 | 0          | 1           | 1             |
| AT3G47610 | 0          | 1           | 1             |
| AT3G47620 | 0          | 1           | 1             |
| AT3G47630 | 0          | 1           | 1             |
| AT3G47640 | 0          | 1           | 1             |
| AT3G47660 | 1          | 0           | 1             |
| AT3G47790 | 1          | 0           | 1             |
| AT3G47830 | 1          | 0           | 1             |
| AT3G47840 | 1          | 0           | 1             |
| AT3G47960 | 0          | 1           | 1             |
| AT3G47965 | 0          | 1           | 1             |
| AT3G48110 | 1          | 0           | 1             |
| AT3G48120 | 1          | 0           | 1             |
| AT3G48235 | 0          | 1           | 1             |
| AT3G48240 | 1          | 1           | 1             |
| AT3G48250 | 0          | 1           | 1             |
| AT3G48350 | 0          | 1           | 1             |
| AT3G48360 | 1          | 1           | 1             |
| AT3G48370 | 0          | 1           | 1             |
| AT3G48520 | 0          | 1           | 1             |
| AT3G48523 | 0          | 1           | 1             |
| AT3G48620 | 1          | 0           | 1             |
| AT3G48690 | 1          | 0           | 1             |
| AT3G49110 | 0          | 1           | 1             |
| AT3G49120 | 0          | 1           | 1             |
| AT3G49210 | 0          | 1           | 1             |
| AT3G49220 | 0          | 1           | 1             |
| AT3G49350 | 0          | 1           | 1             |
| AT3G49360 | 0          | 1           | 1             |
| AT3G49570 | 1          | 1           | 1             |

Appendix Table S3

| Name      | BES_target | BZR1_target | BESBZR_target |
|-----------|------------|-------------|---------------|
| AT3G49580 | 0          | 1           | 1             |
| AT3G49610 | 0          | 1           | 1             |
| AT3G49620 | 0          | 1           | 1             |
| AT3G49770 | 0          | 1           | 1             |
| AT3G49780 | 0          | 1           | 1             |
| AT3G49790 | 1          | 1           | 1             |
| AT3G49800 | 0          | 1           | 1             |
| AT3G49810 | 0          | 1           | 1             |
| AT3G49820 | 0          | 1           | 1             |
| AT3G49940 | 0          | 1           | 1             |
| AT3G49950 | 0          | 1           | 1             |
| AT3G49970 | 1          | 1           | 1             |
| AT3G49980 | 1          | 1           | 1             |
| AT3G49990 | 0          | 1           | 1             |
| AT3G50060 | 1          | 1           | 1             |
| AT3G50070 | 0          | 1           | 1             |
| AT3G50330 | 0          | 1           | 1             |
| AT3G50340 | 0          | 1           | 1             |
| AT3G50350 | 0          | 1           | 1             |
| AT3G50410 | 0          | 1           | 1             |
| AT3G50450 | 1          | 0           | 1             |
| AT3G50520 | 0          | 1           | 1             |
| AT3G50530 | 0          | 1           | 1             |
| AT3G50560 | 0          | 1           | 1             |
| AT3G50570 | 0          | 1           | 1             |
| AT3G50650 | 0          | 1           | 1             |
| AT3G50660 | 1          | 1           | 1             |
| AT3G50665 | 0          | 1           | 1             |
| AT3G50740 | 0          | 1           | 1             |
| AT3G50750 | 1          | 1           | 1             |
| AT3G50760 | 0          | 1           | 1             |
| AT3G50770 | 0          | 1           | 1             |
| AT3G50800 | 1          | 1           | 1             |
| AT3G50810 | 0          | 1           | 1             |
| AT3G50870 | 1          | 0           | 1             |
| AT3G51240 | 1          | 0           | 1             |
| AT3G51250 | 1          | 0           | 1             |
| AT3G51360 | 0          | 1           | 1             |
| AT3G51370 | 1          | 1           | 1             |
| AT3G51400 | 1          | 1           | 1             |
| AT3G51410 | 0          | 1           | 1             |
| AT3G51480 | 1          | 0           | 1             |
| AT3G51590 | 0          | 1           | 1             |
| AT3G51600 | 0          | 1           | 1             |
| AT3G51660 | 0          | 1           | 1             |
| AT3G51670 | 0          | 1           | 1             |
| AT3G51850 | 0          | 1           | 1             |
| AT3G51860 | 1          | 1           | 1             |
| AT3G51880 | 1          | 0           | 1             |
| AT3G51895 | 0          | 1           | 1             |
| AT3G51910 | 0          | 1           | 1             |

Appendix Table S3

| Name      | BES_target | BZR1_target | BESBZR_target |
|-----------|------------|-------------|---------------|
| AT3G52060 | 0          | 1           | 1             |
| AT3G52150 | 1          | 0           | 1             |
| AT3G52400 | 0          | 1           | 1             |
| AT3G52410 | 0          | 1           | 1             |
| AT3G52440 | 0          | 1           | 1             |
| AT3G52450 | 0          | 1           | 1             |
| AT3G52460 | 0          | 1           | 1             |
| AT3G52470 | 0          | 1           | 1             |
| AT3G52500 | 0          | 1           | 1             |
| AT3G52510 | 0          | 1           | 1             |
| AT3G52520 | 0          | 1           | 1             |
| AT3G52705 | 0          | 1           | 1             |
| AT3G52710 | 0          | 1           | 1             |
| AT3G52720 | 0          | 1           | 1             |
| AT3G52870 | 0          | 1           | 1             |
| AT3G52880 | 0          | 1           | 1             |
| AT3G52930 | 1          | 0           | 1             |
| AT3G53230 | 0          | 1           | 1             |
| AT3G53232 | 0          | 1           | 1             |
| AT3G53270 | 0          | 1           | 1             |
| AT3G53380 | 0          | 1           | 1             |
| AT3G53390 | 0          | 1           | 1             |
| AT3G53420 | 1          | 1           | 1             |
| AT3G53430 | 0          | 1           | 1             |
| AT3G53480 | 1          | 0           | 1             |
| AT3G53540 | 0          | 1           | 1             |
| AT3G53550 | 0          | 1           | 1             |
| AT3G53590 | 0          | 1           | 1             |
| AT3G53600 | 0          | 1           | 1             |
| AT3G53810 | 0          | 1           | 1             |
| AT3G53820 | 0          | 1           | 1             |
| AT3G53850 | 1          | 0           | 1             |
| AT3G53990 | 1          | 0           | 1             |
| AT3G54020 | 0          | 1           | 1             |
| AT3G54030 | 1          | 1           | 1             |
| AT3G54460 | 1          | 0           | 1             |
| AT3G54690 | 1          | 0           | 1             |
| AT3G54700 | 1          | 0           | 1             |
| AT3G54900 | 1          | 0           | 1             |
| AT3G54910 | 0          | 1           | 1             |
| AT3G54920 | 0          | 1           | 1             |
| AT3G54930 | 0          | 1           | 1             |
| AT3G54940 | 0          | 1           | 1             |
| AT3G54950 | 0          | 1           | 1             |
| AT3G54990 | 0          | 1           | 1             |
| AT3G55000 | 0          | 1           | 1             |
| AT3G55230 | 0          | 1           | 1             |
| AT3G55240 | 0          | 1           | 1             |
| AT3G55250 | 0          | 1           | 1             |
| AT3G55570 | 0          | 1           | 1             |
| AT3G55650 | 1          | 0           | 1             |

Appendix Table S3

| Name      | BES_target | BZR1_target | BESBZR_target |
|-----------|------------|-------------|---------------|
| AT3G55730 | 0          | 1           | 1             |
| AT3G55734 | 0          | 1           | 1             |
| AT3G55950 | 1          | 0           | 1             |
| AT3G55960 | 1          | 0           | 1             |
| AT3G55970 | 0          | 1           | 1             |
| AT3G55980 | 0          | 1           | 1             |
| AT3G55990 | 0          | 1           | 1             |
| AT3G56050 | 0          | 1           | 1             |
| AT3G56060 | 0          | 1           | 1             |
| AT3G56070 | 0          | 1           | 1             |
| AT3G56080 | 1          | 0           | 1             |
| AT3G56090 | 1          | 0           | 1             |
| AT3G56190 | 0          | 1           | 1             |
| AT3G56200 | 0          | 1           | 1             |
| AT3G56270 | 0          | 1           | 1             |
| AT3G56275 | 0          | 1           | 1             |
| AT3G56360 | 1          | 0           | 1             |
| AT3G56400 | 0          | 1           | 1             |
| AT3G56410 | 0          | 1           | 1             |
| AT3G56690 | 1          | 0           | 1             |
| AT3G56705 | 0          | 1           | 1             |
| AT3G56710 | 0          | 1           | 1             |
| AT3G56720 | 0          | 1           | 1             |
| AT3G56800 | 0          | 1           | 1             |
| AT3G56810 | 0          | 1           | 1             |
| AT3G56820 | 0          | 1           | 1             |
| AT3G56880 | 0          | 1           | 1             |
| AT3G56890 | 0          | 1           | 1             |
| AT3G57020 | 0          | 1           | 1             |
| AT3G57030 | 0          | 1           | 1             |
| AT3G57320 | 0          | 1           | 1             |
| AT3G57330 | 0          | 1           | 1             |
| AT3G57340 | 0          | 1           | 1             |
| AT3G57390 | 0          | 1           | 1             |
| AT3G57400 | 1          | 1           | 1             |
| AT3G57520 | 0          | 1           | 1             |
| AT3G57530 | 0          | 1           | 1             |
| AT3G57540 | 1          | 1           | 1             |
| AT3G57550 | 0          | 1           | 1             |
| AT3G57560 | 0          | 1           | 1             |
| AT3G57620 | 1          | 0           | 1             |
| AT3G57790 | 0          | 1           | 1             |
| AT3G57800 | 1          | 1           | 1             |
| AT3G57810 | 0          | 1           | 1             |
| AT3G57870 | 0          | 1           | 1             |
| AT3G57880 | 0          | 1           | 1             |
| AT3G57890 | 0          | 1           | 1             |
| AT3G57990 | 1          | 0           | 1             |
| AT3G58070 | 0          | 1           | 1             |
| AT3G58080 | 0          | 1           | 1             |
| AT3G58090 | 0          | 1           | 1             |



Appendix Table S3

| Name      | BES_target | BZR1_target | BESBZR_target |
|-----------|------------|-------------|---------------|
| AT3G58110 | 0          | 1           | 1             |
| AT3G58120 | 0          | 1           | 1             |
| AT3G58130 | 0          | 1           | 1             |
| AT3G58190 | 0          | 1           | 1             |
| AT3G58193 | 0          | 1           | 1             |
| AT3G58520 | 1          | 0           | 1             |
| AT3G58610 | 0          | 1           | 1             |
| AT3G58620 | 0          | 1           | 1             |
| AT3G58640 | 0          | 1           | 1             |
| AT3G58650 | 0          | 1           | 1             |
| AT3G58850 | 1          | 1           | 1             |
| AT3G58860 | 0          | 1           | 1             |
| AT3G58930 | 1          | 0           | 1             |
| AT3G59060 | 1          | 1           | 1             |
| AT3G59070 | 0          | 1           | 1             |
| AT3G59660 | 1          | 0           | 1             |
| AT3G59760 | 0          | 1           | 1             |
| AT3G59765 | 0          | 1           | 1             |
| AT3G59770 | 0          | 1           | 1             |
| AT3G59880 | 0          | 1           | 1             |
| AT3G59890 | 0          | 1           | 1             |
| AT3G59923 | 1          | 0           | 1             |
| AT3G59926 | 1          | 0           | 1             |
| AT3G59990 | 1          | 0           | 1             |
| AT3G60080 | 0          | 1           | 1             |
| AT3G60090 | 0          | 1           | 1             |
| AT3G60100 | 1          | 0           | 1             |
| AT3G60160 | 0          | 1           | 1             |
| AT3G60170 | 1          | 1           | 1             |
| AT3G60190 | 0          | 1           | 1             |
| AT3G60200 | 0          | 1           | 1             |
| AT3G60280 | 0          | 1           | 1             |
| AT3G60290 | 0          | 1           | 1             |
| AT3G60300 | 0          | 1           | 1             |
| AT3G60310 | 0          | 1           | 1             |
| AT3G60320 | 0          | 1           | 1             |
| AT3G60330 | 0          | 1           | 1             |
| AT3G60340 | 0          | 1           | 1             |
| AT3G60380 | 0          | 1           | 1             |
| AT3G60390 | 0          | 1           | 1             |
| AT3G60400 | 1          | 1           | 1             |
| AT3G60520 | 1          | 1           | 1             |
| AT3G60530 | 0          | 1           | 1             |
| AT3G60540 | 0          | 1           | 1             |
| AT3G60550 | 1          | 1           | 1             |
| AT3G60680 | 1          | 1           | 1             |
| AT3G60690 | 1          | 1           | 1             |
| AT3G60700 | 0          | 1           | 1             |
| AT3G60970 | 1          | 0           | 1             |
| AT3G61050 | 0          | 1           | 1             |
| AT3G61060 | 0          | 1           | 1             |

Appendix Table S3

| Name      | BES_target | BZR1_target | BESBZR_target |
|-----------|------------|-------------|---------------|
| AT3G61130 | 0          | 1           | 1             |
| AT3G61140 | 0          | 1           | 1             |
| AT3G61150 | 0          | 1           | 1             |
| AT3G61160 | 0          | 1           | 1             |
| AT3G61185 | 0          | 1           | 1             |
| AT3G61190 | 0          | 1           | 1             |
| AT3G61240 | 0          | 1           | 1             |
| AT3G61250 | 0          | 1           | 1             |
| AT3G61320 | 1          | 0           | 1             |
| AT3G61420 | 1          | 1           | 1             |
| AT3G61430 | 0          | 1           | 1             |
| AT3G61440 | 0          | 1           | 1             |
| AT3G61450 | 0          | 1           | 1             |
| AT3G61460 | 1          | 1           | 1             |
| AT3G61470 | 1          | 1           | 1             |
| AT3G61570 | 0          | 1           | 1             |
| AT3G61580 | 0          | 1           | 1             |
| AT3G61630 | 0          | 1           | 1             |
| AT3G61640 | 0          | 1           | 1             |
| AT3G61670 | 0          | 1           | 1             |
| AT3G61810 | 0          | 1           | 1             |
| AT3G61820 | 0          | 1           | 1             |
| AT3G61880 | 1          | 0           | 1             |
| AT3G61960 | 0          | 1           | 1             |
| AT3G61970 | 0          | 1           | 1             |
| AT3G62080 | 1          | 0           | 1             |
| AT3G62090 | 0          | 1           | 1             |
| AT3G62100 | 0          | 1           | 1             |
| AT3G62200 | 1          | 0           | 1             |
| AT3G62390 | 1          | 0           | 1             |
| AT3G62400 | 1          | 0           | 1             |
| AT3G62620 | 0          | 1           | 1             |
| AT3G62630 | 0          | 1           | 1             |
| AT3G62640 | 0          | 1           | 1             |
| AT3G62650 | 1          | 1           | 1             |
| AT3G62690 | 0          | 1           | 1             |
| AT3G62700 | 0          | 1           | 1             |
| AT3G62830 | 1          | 0           | 1             |
| AT3G62980 | 1          | 1           | 1             |
| AT3G62990 | 0          | 1           | 1             |
| AT3G63006 | 0          | 1           | 1             |
| AT3G63010 | 0          | 1           | 1             |
| AT3G63020 | 0          | 1           | 1             |
| AT3G63060 | 1          | 0           | 1             |
| AT3G63070 | 1          | 0           | 1             |
| AT3G63360 | 1          | 0           | 1             |
| AT3G63370 | 1          | 0           | 1             |
| AT3G63380 | 0          | 1           | 1             |
| AT3G63390 | 0          | 1           | 1             |
| AT3G63400 | 0          | 1           | 1             |
| AT3G66652 | 1          | 0           | 1             |

Appendix Table S3

| <b>Name</b> | <b>BES_target</b> | <b>BZR1_target</b> | <b>BESBZR_target</b> |
|-------------|-------------------|--------------------|----------------------|
| AT4G00050   | 0                 | 1                  | 1                    |
| AT4G00060   | 0                 | 1                  | 1                    |
| AT4G00140   | 1                 | 1                  | 1                    |
| AT4G00150   | 1                 | 1                  | 1                    |
| AT4G00290   | 0                 | 1                  | 1                    |
| AT4G00300   | 0                 | 1                  | 1                    |
| AT4G00305   | 0                 | 1                  | 1                    |
| AT4G00350   | 1                 | 0                  | 1                    |
| AT4G00380   | 1                 | 0                  | 1                    |
| AT4G00430   | 0                 | 1                  | 1                    |
| AT4G00440   | 1                 | 1                  | 1                    |
| AT4G00585   | 1                 | 0                  | 1                    |
| AT4G00640   | 1                 | 1                  | 1                    |
| AT4G00650   | 0                 | 1                  | 1                    |
| AT4G00680   | 1                 | 0                  | 1                    |
| AT4G00720   | 0                 | 1                  | 1                    |
| AT4G00730   | 1                 | 1                  | 1                    |
| AT4G00740   | 0                 | 1                  | 1                    |
| AT4G00820   | 1                 | 0                  | 1                    |
| AT4G01026   | 1                 | 0                  | 1                    |
| AT4G01070   | 0                 | 1                  | 1                    |
| AT4G01080   | 1                 | 1                  | 1                    |
| AT4G01090   | 0                 | 1                  | 1                    |
| AT4G01100   | 0                 | 1                  | 1                    |
| AT4G01110   | 1                 | 0                  | 1                    |
| AT4G01200   | 1                 | 0                  | 1                    |
| AT4G01220   | 1                 | 0                  | 1                    |
| AT4G01245   | 1                 | 1                  | 1                    |
| AT4G01250   | 0                 | 1                  | 1                    |
| AT4G01390   | 1                 | 0                  | 1                    |
| AT4G01525   | 0                 | 1                  | 1                    |
| AT4G01530   | 1                 | 1                  | 1                    |
| AT4G01680   | 0                 | 1                  | 1                    |
| AT4G01690   | 1                 | 1                  | 1                    |
| AT4G01710   | 0                 | 1                  | 1                    |
| AT4G01720   | 0                 | 1                  | 1                    |
| AT4G01800   | 0                 | 1                  | 1                    |
| AT4G01810   | 0                 | 1                  | 1                    |
| AT4G01860   | 0                 | 1                  | 1                    |
| AT4G01865   | 0                 | 1                  | 1                    |
| AT4G01870   | 1                 | 1                  | 1                    |
| AT4G01880   | 1                 | 1                  | 1                    |
| AT4G01883   | 0                 | 1                  | 1                    |
| AT4G01960   | 0                 | 1                  | 1                    |
| AT4G02110   | 1                 | 0                  | 1                    |
| AT4G02320   | 0                 | 1                  | 1                    |
| AT4G02330   | 0                 | 1                  | 1                    |
| AT4G02360   | 1                 | 0                  | 1                    |
| AT4G02420   | 0                 | 1                  | 1                    |
| AT4G02425   | 0                 | 1                  | 1                    |
| AT4G02650   | 1                 | 0                  | 1                    |

Appendix Table S3

| Name      | BES_target | BZR1_target | BESBZR_target |
|-----------|------------|-------------|---------------|
| AT4G02660 | 1          | 0           | 1             |
| AT4G02900 | 1          | 0           | 1             |
| AT4G03060 | 1          | 0           | 1             |
| AT4G03115 | 1          | 0           | 1             |
| AT4G03205 | 0          | 1           | 1             |
| AT4G03210 | 0          | 1           | 1             |
| AT4G03390 | 0          | 1           | 1             |
| AT4G03400 | 1          | 1           | 1             |
| AT4G03410 | 1          | 1           | 1             |
| AT4G03420 | 0          | 1           | 1             |
| AT4G03430 | 0          | 1           | 1             |
| AT4G03510 | 1          | 1           | 1             |
| AT4G03520 | 0          | 1           | 1             |
| AT4G03540 | 0          | 1           | 1             |
| AT4G03550 | 0          | 1           | 1             |
| AT4G03560 | 0          | 1           | 1             |
| AT4G03840 | 1          | 0           | 1             |
| AT4G03850 | 1          | 0           | 1             |
| AT4G03873 | 1          | 0           | 1             |
| AT4G03965 | 1          | 0           | 1             |
| AT4G04020 | 1          | 0           | 1             |
| AT4G04050 | 1          | 0           | 1             |
| AT4G04545 | 1          | 0           | 1             |
| AT4G05010 | 0          | 1           | 1             |
| AT4G05020 | 0          | 1           | 1             |
| AT4G05048 | 0          | 1           | 1             |
| AT4G05050 | 0          | 1           | 1             |
| AT4G05060 | 0          | 1           | 1             |
| AT4G05070 | 0          | 1           | 1             |
| AT4G05073 | 0          | 1           | 1             |
| AT4G05100 | 0          | 1           | 1             |
| AT4G05105 | 1          | 1           | 1             |
| AT4G05190 | 1          | 0           | 1             |
| AT4G05610 | 1          | 0           | 1             |
| AT4G05613 | 1          | 0           | 1             |
| AT4G06480 | 1          | 0           | 1             |
| AT4G06495 | 1          | 0           | 1             |
| AT4G06500 | 1          | 0           | 1             |
| AT4G06529 | 1          | 0           | 1             |
| AT4G06550 | 1          | 0           | 1             |
| AT4G06574 | 1          | 0           | 1             |
| AT4G06584 | 1          | 0           | 1             |
| AT4G06585 | 1          | 0           | 1             |
| AT4G06591 | 1          | 0           | 1             |
| AT4G06604 | 1          | 0           | 1             |
| AT4G06605 | 1          | 0           | 1             |
| AT4G06606 | 1          | 0           | 1             |
| AT4G06640 | 1          | 0           | 1             |
| AT4G06650 | 1          | 0           | 1             |
| AT4G06726 | 1          | 0           | 1             |
| AT4G06752 | 1          | 0           | 1             |

Appendix Table S3

| <b>Name</b> | <b>BES_target</b> | <b>BZR1_target</b> | <b>BESBZR_target</b> |
|-------------|-------------------|--------------------|----------------------|
| AT4G07560   | 1                 | 0                  | 1                    |
| AT4G07666   | 1                 | 0                  | 1                    |
| AT4G07733   | 1                 | 0                  | 1                    |
| AT4G07738   | 1                 | 0                  | 1                    |
| AT4G07840   | 1                 | 0                  | 1                    |
| AT4G08016   | 1                 | 0                  | 1                    |
| AT4G08039   | 0                 | 1                  | 1                    |
| AT4G08040   | 0                 | 1                  | 1                    |
| AT4G08091   | 1                 | 0                  | 1                    |
| AT4G08096   | 1                 | 0                  | 1                    |
| AT4G08210   | 1                 | 0                  | 1                    |
| AT4G08230   | 1                 | 0                  | 1                    |
| AT4G08400   | 1                 | 0                  | 1                    |
| AT4G08430   | 1                 | 0                  | 1                    |
| AT4G08710   | 1                 | 0                  | 1                    |
| AT4G08840   | 0                 | 1                  | 1                    |
| AT4G08850   | 0                 | 1                  | 1                    |
| AT4G08860   | 0                 | 1                  | 1                    |
| AT4G08945   | 0                 | 1                  | 1                    |
| AT4G08950   | 0                 | 1                  | 1                    |
| AT4G08953   | 0                 | 1                  | 1                    |
| AT4G08960   | 1                 | 0                  | 1                    |
| AT4G09150   | 1                 | 0                  | 1                    |
| AT4G09200   | 1                 | 0                  | 1                    |
| AT4G09880   | 0                 | 1                  | 1                    |
| AT4G09890   | 0                 | 1                  | 1                    |
| AT4G09965   | 1                 | 0                  | 1                    |
| AT4G09970   | 1                 | 0                  | 1                    |
| AT4G10570   | 1                 | 0                  | 1                    |
| AT4G11130   | 0                 | 1                  | 1                    |
| AT4G11140   | 0                 | 1                  | 1                    |
| AT4G11300   | 0                 | 1                  | 1                    |
| AT4G11310   | 0                 | 1                  | 1                    |
| AT4G11510   | 0                 | 1                  | 1                    |
| AT4G11530   | 0                 | 1                  | 1                    |
| AT4G11540   | 0                 | 1                  | 1                    |
| AT4G12290   | 1                 | 0                  | 1                    |
| AT4G12300   | 0                 | 1                  | 1                    |
| AT4G12310   | 0                 | 1                  | 1                    |
| AT4G13110   | 1                 | 0                  | 1                    |
| AT4G13340   | 0                 | 1                  | 1                    |
| AT4G13345   | 0                 | 1                  | 1                    |
| AT4G13395   | 0                 | 1                  | 1                    |
| AT4G13400   | 0                 | 1                  | 1                    |
| AT4G13410   | 0                 | 1                  | 1                    |
| AT4G13420   | 0                 | 1                  | 1                    |
| AT4G13510   | 0                 | 1                  | 1                    |
| AT4G13520   | 0                 | 1                  | 1                    |
| AT4G13640   | 0                 | 1                  | 1                    |
| AT4G13650   | 0                 | 1                  | 1                    |
| AT4G13660   | 0                 | 1                  | 1                    |

Appendix Table S3

| <b>Name</b> | <b>BES_target</b> | <b>BZR1_target</b> | <b>BESBZR_target</b> |
|-------------|-------------------|--------------------|----------------------|
| AT4G13790   | 0                 | 1                  | 1                    |
| AT4G13800   | 0                 | 1                  | 1                    |
| AT4G14120   | 1                 | 0                  | 1                    |
| AT4G14410   | 1                 | 0                  | 1                    |
| AT4G14430   | 0                 | 1                  | 1                    |
| AT4G14440   | 0                 | 1                  | 1                    |
| AT4G14450   | 0                 | 1                  | 1                    |
| AT4G14490   | 1                 | 0                  | 1                    |
| AT4G14500   | 1                 | 0                  | 1                    |
| AT4G14560   | 1                 | 0                  | 1                    |
| AT4G14680   | 0                 | 1                  | 1                    |
| AT4G14690   | 0                 | 1                  | 1                    |
| AT4G14920   | 0                 | 1                  | 1                    |
| AT4G14930   | 0                 | 1                  | 1                    |
| AT4G14980   | 0                 | 1                  | 1                    |
| AT4G14990   | 0                 | 1                  | 1                    |
| AT4G15140   | 1                 | 0                  | 1                    |
| AT4G15215   | 1                 | 0                  | 1                    |
| AT4G15233   | 0                 | 1                  | 1                    |
| AT4G15236   | 0                 | 1                  | 1                    |
| AT4G15250   | 0                 | 1                  | 1                    |
| AT4G15258   | 0                 | 1                  | 1                    |
| AT4G15260   | 1                 | 0                  | 1                    |
| AT4G15415   | 1                 | 0                  | 1                    |
| AT4G15417   | 0                 | 1                  | 1                    |
| AT4G15420   | 0                 | 1                  | 1                    |
| AT4G15430   | 0                 | 1                  | 1                    |
| AT4G15440   | 1                 | 0                  | 1                    |
| AT4G15480   | 0                 | 1                  | 1                    |
| AT4G15490   | 0                 | 1                  | 1                    |
| AT4G15540   | 0                 | 1                  | 1                    |
| AT4G15545   | 0                 | 1                  | 1                    |
| AT4G15550   | 0                 | 1                  | 1                    |
| AT4G15560   | 0                 | 1                  | 1                    |
| AT4G15590   | 0                 | 1                  | 1                    |
| AT4G15610   | 0                 | 1                  | 1                    |
| AT4G15730   | 1                 | 0                  | 1                    |
| AT4G15910   | 0                 | 1                  | 1                    |
| AT4G15920   | 0                 | 1                  | 1                    |
| AT4G15930   | 0                 | 1                  | 1                    |
| AT4G15955   | 1                 | 0                  | 1                    |
| AT4G16144   | 0                 | 1                  | 1                    |
| AT4G16146   | 0                 | 1                  | 1                    |
| AT4G16150   | 0                 | 1                  | 1                    |
| AT4G16370   | 0                 | 1                  | 1                    |
| AT4G16380   | 0                 | 1                  | 1                    |
| AT4G16390   | 0                 | 1                  | 1                    |
| AT4G16490   | 1                 | 1                  | 1                    |
| AT4G16500   | 1                 | 1                  | 1                    |
| AT4G16580   | 0                 | 1                  | 1                    |
| AT4G16590   | 1                 | 1                  | 1                    |

Appendix Table S3

| <b>Name</b> | <b>BES_target</b> | <b>BZR1_target</b> | <b>BESBZR_target</b> |
|-------------|-------------------|--------------------|----------------------|
| AT4G16600   | 0                 | 1                  | 1                    |
| AT4G16640   | 1                 | 0                  | 1                    |
| AT4G16745   | 0                 | 1                  | 1                    |
| AT4G16750   | 0                 | 1                  | 1                    |
| AT4G16770   | 1                 | 1                  | 1                    |
| AT4G16780   | 1                 | 1                  | 1                    |
| AT4G16880   | 0                 | 1                  | 1                    |
| AT4G16890   | 0                 | 1                  | 1                    |
| AT4G17090   | 0                 | 1                  | 1                    |
| AT4G17098   | 1                 | 1                  | 1                    |
| AT4G17100   | 0                 | 1                  | 1                    |
| AT4G17240   | 0                 | 1                  | 1                    |
| AT4G17245   | 0                 | 1                  | 1                    |
| AT4G17410   | 0                 | 1                  | 1                    |
| AT4G17420   | 1                 | 1                  | 1                    |
| AT4G17430   | 1                 | 0                  | 1                    |
| AT4G17440   | 0                 | 1                  | 1                    |
| AT4G17450   | 1                 | 1                  | 1                    |
| AT4G17460   | 1                 | 1                  | 1                    |
| AT4G17486   | 0                 | 1                  | 1                    |
| AT4G17490   | 0                 | 1                  | 1                    |
| AT4G17500   | 1                 | 1                  | 1                    |
| AT4G17612   | 0                 | 1                  | 1                    |
| AT4G17615   | 1                 | 1                  | 1                    |
| AT4G17670   | 0                 | 1                  | 1                    |
| AT4G17680   | 0                 | 1                  | 1                    |
| AT4G17870   | 0                 | 1                  | 1                    |
| AT4G17880   | 0                 | 1                  | 1                    |
| AT4G17895   | 0                 | 1                  | 1                    |
| AT4G17900   | 0                 | 1                  | 1                    |
| AT4G17940   | 1                 | 0                  | 1                    |
| AT4G18010   | 0                 | 1                  | 1                    |
| AT4G18020   | 0                 | 1                  | 1                    |
| AT4G18030   | 0                 | 1                  | 1                    |
| AT4G18050   | 1                 | 0                  | 1                    |
| AT4G18195   | 0                 | 1                  | 1                    |
| AT4G18197   | 0                 | 1                  | 1                    |
| AT4G18205   | 0                 | 1                  | 1                    |
| AT4G18210   | 0                 | 1                  | 1                    |
| AT4G18220   | 1                 | 1                  | 1                    |
| AT4G18440   | 1                 | 0                  | 1                    |
| AT4G18550   | 0                 | 1                  | 1                    |
| AT4G18570   | 0                 | 1                  | 1                    |
| AT4G18600   | 1                 | 0                  | 1                    |
| AT4G18660   | 0                 | 1                  | 1                    |
| AT4G18670   | 0                 | 1                  | 1                    |
| AT4G18690   | 0                 | 1                  | 1                    |
| AT4G18700   | 0                 | 1                  | 1                    |
| AT4G18710   | 0                 | 1                  | 1                    |
| AT4G18880   | 0                 | 1                  | 1                    |
| AT4G18890   | 0                 | 1                  | 1                    |

Appendix Table S3

| Name      | BES_target | BZR1_target | BESBZR_target |
|-----------|------------|-------------|---------------|
| AT4G18900 | 0          | 1           | 1             |
| AT4G18950 | 1          | 0           | 1             |
| AT4G18975 | 0          | 1           | 1             |
| AT4G18980 | 0          | 1           | 1             |
| AT4G19040 | 0          | 1           | 1             |
| AT4G19050 | 0          | 1           | 1             |
| AT4G19160 | 0          | 1           | 1             |
| AT4G19170 | 1          | 1           | 1             |
| AT4G19180 | 0          | 1           | 1             |
| AT4G19220 | 0          | 1           | 1             |
| AT4G19230 | 0          | 1           | 1             |
| AT4G19420 | 0          | 1           | 1             |
| AT4G19430 | 0          | 1           | 1             |
| AT4G19440 | 0          | 1           | 1             |
| AT4G19520 | 0          | 1           | 1             |
| AT4G19530 | 0          | 1           | 1             |
| AT4G19690 | 0          | 1           | 1             |
| AT4G19700 | 0          | 1           | 1             |
| AT4G19710 | 0          | 1           | 1             |
| AT4G19950 | 0          | 1           | 1             |
| AT4G19960 | 0          | 1           | 1             |
| AT4G20170 | 0          | 1           | 1             |
| AT4G20180 | 1          | 1           | 1             |
| AT4G20240 | 0          | 1           | 1             |
| AT4G20250 | 0          | 1           | 1             |
| AT4G20260 | 0          | 1           | 1             |
| AT4G20690 | 1          | 0           | 1             |
| AT4G20770 | 1          | 0           | 1             |
| AT4G20820 | 0          | 1           | 1             |
| AT4G20830 | 0          | 1           | 1             |
| AT4G20850 | 0          | 1           | 1             |
| AT4G20860 | 0          | 1           | 1             |
| AT4G20870 | 1          | 1           | 1             |
| AT4G20880 | 1          | 1           | 1             |
| AT4G20890 | 0          | 1           | 1             |
| AT4G20960 | 1          | 1           | 1             |
| AT4G20970 | 0          | 1           | 1             |
| AT4G21110 | 0          | 1           | 1             |
| AT4G21120 | 0          | 1           | 1             |
| AT4G21300 | 1          | 0           | 1             |
| AT4G21350 | 1          | 0           | 1             |
| AT4G21360 | 1          | 0           | 1             |
| AT4G21430 | 0          | 1           | 1             |
| AT4G21440 | 0          | 1           | 1             |
| AT4G21605 | 1          | 0           | 1             |
| AT4G21720 | 1          | 0           | 1             |
| AT4G21810 | 1          | 0           | 1             |
| AT4G21900 | 0          | 1           | 1             |
| AT4G21910 | 0          | 1           | 1             |
| AT4G21920 | 0          | 1           | 1             |
| AT4G21930 | 1          | 1           | 1             |



Appendix Table S3

| Name      | BES_target | BZR1_target | BESBZR_target |
|-----------|------------|-------------|---------------|
| AT4G21940 | 0          | 1           | 1             |
| AT4G21950 | 0          | 1           | 1             |
| AT4G21960 | 1          | 1           | 1             |
| AT4G21970 | 0          | 1           | 1             |
| AT4G22190 | 0          | 1           | 1             |
| AT4G22200 | 0          | 1           | 1             |
| AT4G22210 | 0          | 1           | 1             |
| AT4G22240 | 1          | 0           | 1             |
| AT4G22460 | 0          | 1           | 1             |
| AT4G22470 | 0          | 1           | 1             |
| AT4G22485 | 0          | 1           | 1             |
| AT4G22530 | 0          | 1           | 1             |
| AT4G22540 | 0          | 1           | 1             |
| AT4G22545 | 1          | 1           | 1             |
| AT4G22560 | 1          | 0           | 1             |
| AT4G22570 | 1          | 0           | 1             |
| AT4G22590 | 1          | 1           | 1             |
| AT4G22600 | 0          | 1           | 1             |
| AT4G22680 | 0          | 1           | 1             |
| AT4G22690 | 0          | 1           | 1             |
| AT4G22800 | 0          | 1           | 1             |
| AT4G22810 | 0          | 1           | 1             |
| AT4G22980 | 0          | 1           | 1             |
| AT4G22990 | 0          | 1           | 1             |
| AT4G23000 | 1          | 0           | 1             |
| AT4G23030 | 0          | 1           | 1             |
| AT4G23040 | 0          | 1           | 1             |
| AT4G23050 | 0          | 1           | 1             |
| AT4G23060 | 1          | 1           | 1             |
| AT4G23180 | 0          | 1           | 1             |
| AT4G23190 | 0          | 1           | 1             |
| AT4G23200 | 0          | 1           | 1             |
| AT4G23205 | 0          | 1           | 1             |
| AT4G23210 | 0          | 1           | 1             |
| AT4G23220 | 0          | 1           | 1             |
| AT4G23250 | 0          | 1           | 1             |
| AT4G23260 | 0          | 1           | 1             |
| AT4G23460 | 1          | 0           | 1             |
| AT4G23470 | 1          | 1           | 1             |
| AT4G23490 | 0          | 1           | 1             |
| AT4G23493 | 0          | 1           | 1             |
| AT4G23740 | 0          | 1           | 1             |
| AT4G23750 | 0          | 1           | 1             |
| AT4G23810 | 0          | 1           | 1             |
| AT4G23820 | 0          | 1           | 1             |
| AT4G24030 | 0          | 1           | 1             |
| AT4G24040 | 1          | 1           | 1             |
| AT4G24050 | 0          | 1           | 1             |
| AT4G24060 | 1          | 0           | 1             |
| AT4G24110 | 0          | 1           | 1             |
| AT4G24120 | 0          | 1           | 1             |

Appendix Table S3

| <b>Name</b> | <b>BES_target</b> | <b>BZR1_target</b> | <b>BESBZR_target</b> |
|-------------|-------------------|--------------------|----------------------|
| AT4G24140   | 0                 | 1                  | 1                    |
| AT4G24150   | 0                 | 1                  | 1                    |
| AT4G24160   | 0                 | 1                  | 1                    |
| AT4G24200   | 0                 | 1                  | 1                    |
| AT4G24210   | 0                 | 1                  | 1                    |
| AT4G24220   | 0                 | 1                  | 1                    |
| AT4G24230   | 0                 | 1                  | 1                    |
| AT4G24240   | 1                 | 1                  | 1                    |
| AT4G24250   | 0                 | 1                  | 1                    |
| AT4G24350   | 1                 | 0                  | 1                    |
| AT4G24660   | 0                 | 1                  | 1                    |
| AT4G24670   | 0                 | 1                  | 1                    |
| AT4G24830   | 1                 | 0                  | 1                    |
| AT4G24970   | 0                 | 1                  | 1                    |
| AT4G24972   | 1                 | 1                  | 1                    |
| AT4G25260   | 1                 | 0                  | 1                    |
| AT4G25350   | 0                 | 1                  | 1                    |
| AT4G25360   | 0                 | 1                  | 1                    |
| AT4G25380   | 0                 | 1                  | 1                    |
| AT4G25390   | 1                 | 1                  | 1                    |
| AT4G25410   | 0                 | 1                  | 1                    |
| AT4G25420   | 0                 | 1                  | 1                    |
| AT4G25430   | 0                 | 1                  | 1                    |
| AT4G25433   | 0                 | 1                  | 1                    |
| AT4G25434   | 0                 | 1                  | 1                    |
| AT4G25450   | 0                 | 1                  | 1                    |
| AT4G25470   | 1                 | 1                  | 1                    |
| AT4G25480   | 0                 | 1                  | 1                    |
| AT4G25490   | 1                 | 1                  | 1                    |
| AT4G25500   | 1                 | 1                  | 1                    |
| AT4G25570   | 1                 | 0                  | 1                    |
| AT4G25620   | 1                 | 1                  | 1                    |
| AT4G25630   | 0                 | 1                  | 1                    |
| AT4G25980   | 0                 | 1                  | 1                    |
| AT4G25990   | 0                 | 1                  | 1                    |
| AT4G26000   | 0                 | 1                  | 1                    |
| AT4G26080   | 0                 | 1                  | 1                    |
| AT4G26090   | 0                 | 1                  | 1                    |
| AT4G26200   | 0                 | 1                  | 1                    |
| AT4G26210   | 1                 | 1                  | 1                    |
| AT4G26530   | 0                 | 1                  | 1                    |
| AT4G26540   | 1                 | 1                  | 1                    |
| AT4G26630   | 1                 | 0                  | 1                    |
| AT4G26690   | 0                 | 1                  | 1                    |
| AT4G26700   | 1                 | 1                  | 1                    |
| AT4G27050   | 1                 | 0                  | 1                    |
| AT4G27230   | 0                 | 1                  | 1                    |
| AT4G27240   | 0                 | 1                  | 1                    |
| AT4G27250   | 0                 | 1                  | 1                    |
| AT4G27260   | 1                 | 1                  | 1                    |
| AT4G27270   | 0                 | 1                  | 1                    |

Appendix Table S3

| Name      | BES_target | BZR1_target | BESBZR_target |
|-----------|------------|-------------|---------------|
| AT4G27300 | 1          | 1           | 1             |
| AT4G27310 | 0          | 1           | 1             |
| AT4G27320 | 0          | 1           | 1             |
| AT4G27410 | 1          | 1           | 1             |
| AT4G27415 | 1          | 1           | 1             |
| AT4G27500 | 1          | 0           | 1             |
| AT4G27510 | 1          | 1           | 1             |
| AT4G27520 | 0          | 1           | 1             |
| AT4G27530 | 0          | 1           | 1             |
| AT4G27657 | 0          | 1           | 1             |
| AT4G27660 | 0          | 1           | 1             |
| AT4G27730 | 0          | 1           | 1             |
| AT4G27740 | 0          | 1           | 1             |
| AT4G27860 | 0          | 1           | 1             |
| AT4G27870 | 0          | 1           | 1             |
| AT4G27890 | 0          | 1           | 1             |
| AT4G27900 | 0          | 1           | 1             |
| AT4G27970 | 0          | 1           | 1             |
| AT4G27980 | 0          | 1           | 1             |
| AT4G28080 | 0          | 1           | 1             |
| AT4G28085 | 0          | 1           | 1             |
| AT4G28088 | 0          | 1           | 1             |
| AT4G28240 | 1          | 1           | 1             |
| AT4G28250 | 1          | 1           | 1             |
| AT4G28260 | 0          | 1           | 1             |
| AT4G28290 | 1          | 1           | 1             |
| AT4G28300 | 0          | 1           | 1             |
| AT4G28485 | 0          | 1           | 1             |
| AT4G28490 | 0          | 1           | 1             |
| AT4G28500 | 0          | 1           | 1             |
| AT4G28530 | 0          | 1           | 1             |
| AT4G28540 | 1          | 1           | 1             |
| AT4G28660 | 1          | 0           | 1             |
| AT4G29080 | 0          | 1           | 1             |
| AT4G29090 | 1          | 1           | 1             |
| AT4G29130 | 0          | 1           | 1             |
| AT4G29140 | 0          | 1           | 1             |
| AT4G29150 | 0          | 1           | 1             |
| AT4G29190 | 1          | 1           | 1             |
| AT4G29310 | 0          | 1           | 1             |
| AT4G29330 | 0          | 1           | 1             |
| AT4G29430 | 1          | 0           | 1             |
| AT4G29660 | 0          | 1           | 1             |
| AT4G29670 | 0          | 1           | 1             |
| AT4G29680 | 0          | 1           | 1             |
| AT4G29700 | 0          | 1           | 1             |
| AT4G29710 | 0          | 1           | 1             |
| AT4G29735 | 0          | 1           | 1             |
| AT4G29740 | 0          | 1           | 1             |
| AT4G29770 | 0          | 1           | 1             |
| AT4G29780 | 0          | 1           | 1             |

Appendix Table S3

| Name      | BES_target | BZR1_target | BESBZR_target |
|-----------|------------|-------------|---------------|
| AT4G29790 | 0          | 1           | 1             |
| AT4G29900 | 0          | 1           | 1             |
| AT4G29905 | 0          | 1           | 1             |
| AT4G29940 | 0          | 1           | 1             |
| AT4G29950 | 0          | 1           | 1             |
| AT4G30000 | 1          | 0           | 1             |
| AT4G30150 | 1          | 0           | 1             |
| AT4G30190 | 0          | 1           | 1             |
| AT4G30200 | 0          | 1           | 1             |
| AT4G30210 | 0          | 1           | 1             |
| AT4G30270 | 0          | 1           | 1             |
| AT4G30280 | 0          | 1           | 1             |
| AT4G30290 | 1          | 0           | 1             |
| AT4G30340 | 0          | 1           | 1             |
| AT4G30350 | 0          | 1           | 1             |
| AT4G30400 | 0          | 1           | 1             |
| AT4G30410 | 0          | 1           | 1             |
| AT4G30430 | 0          | 1           | 1             |
| AT4G30440 | 0          | 1           | 1             |
| AT4G30450 | 0          | 1           | 1             |
| AT4G30490 | 1          | 1           | 1             |
| AT4G30500 | 1          | 1           | 1             |
| AT4G30550 | 1          | 0           | 1             |
| AT4G30770 | 1          | 0           | 1             |
| AT4G30780 | 1          | 0           | 1             |
| AT4G30790 | 0          | 1           | 1             |
| AT4G30800 | 0          | 1           | 1             |
| AT4G30920 | 1          | 0           | 1             |
| AT4G30940 | 1          | 0           | 1             |
| AT4G30950 | 1          | 0           | 1             |
| AT4G30960 | 1          | 0           | 1             |
| AT4G31210 | 1          | 0           | 1             |
| AT4G31380 | 0          | 1           | 1             |
| AT4G31390 | 1          | 1           | 1             |
| AT4G31500 | 1          | 0           | 1             |
| AT4G31540 | 0          | 1           | 1             |
| AT4G31550 | 0          | 1           | 1             |
| AT4G31560 | 0          | 1           | 1             |
| AT4G31580 | 0          | 1           | 1             |
| AT4G31590 | 0          | 1           | 1             |
| AT4G31770 | 0          | 1           | 1             |
| AT4G31780 | 0          | 1           | 1             |
| AT4G31790 | 0          | 1           | 1             |
| AT4G31800 | 0          | 1           | 1             |
| AT4G31820 | 1          | 1           | 1             |
| AT4G31830 | 0          | 1           | 1             |
| AT4G32010 | 0          | 1           | 1             |
| AT4G32020 | 0          | 1           | 1             |
| AT4G32030 | 0          | 1           | 1             |
| AT4G32215 | 1          | 0           | 1             |
| AT4G32272 | 1          | 1           | 1             |

Appendix Table S3

| <b>Name</b> | <b>BES_target</b> | <b>BZR1_target</b> | <b>BESBZR_target</b> |
|-------------|-------------------|--------------------|----------------------|
| AT4G32280   | 0                 | 1                  | 1                    |
| AT4G32290   | 1                 | 0                  | 1                    |
| AT4G32295   | 0                 | 1                  | 1                    |
| AT4G32300   | 0                 | 1                  | 1                    |
| AT4G32330   | 0                 | 1                  | 1                    |
| AT4G32340   | 0                 | 1                  | 1                    |
| AT4G32350   | 0                 | 1                  | 1                    |
| AT4G32475   | 0                 | 1                  | 1                    |
| AT4G32480   | 0                 | 1                  | 1                    |
| AT4G32490   | 0                 | 1                  | 1                    |
| AT4G32500   | 1                 | 0                  | 1                    |
| AT4G32750   | 0                 | 1                  | 1                    |
| AT4G32760   | 0                 | 1                  | 1                    |
| AT4G32790   | 0                 | 1                  | 1                    |
| AT4G32800   | 0                 | 1                  | 1                    |
| AT4G32860   | 0                 | 1                  | 1                    |
| AT4G32870   | 1                 | 1                  | 1                    |
| AT4G32880   | 0                 | 1                  | 1                    |
| AT4G32920   | 1                 | 1                  | 1                    |
| AT4G32930   | 1                 | 1                  | 1                    |
| AT4G32940   | 0                 | 1                  | 1                    |
| AT4G32950   | 0                 | 1                  | 1                    |
| AT4G33320   | 1                 | 0                  | 1                    |
| AT4G33360   | 1                 | 0                  | 1                    |
| AT4G33430   | 1                 | 1                  | 1                    |
| AT4G33440   | 0                 | 1                  | 1                    |
| AT4G33565   | 1                 | 0                  | 1                    |
| AT4G33666   | 1                 | 0                  | 1                    |
| AT4G33800   | 1                 | 1                  | 1                    |
| AT4G33810   | 0                 | 1                  | 1                    |
| AT4G33880   | 0                 | 1                  | 1                    |
| AT4G33890   | 0                 | 1                  | 1                    |
| AT4G33905   | 0                 | 1                  | 1                    |
| AT4G33910   | 0                 | 1                  | 1                    |
| AT4G33920   | 0                 | 1                  | 1                    |
| AT4G33950   | 0                 | 1                  | 1                    |
| AT4G33960   | 0                 | 1                  | 1                    |
| AT4G34090   | 1                 | 0                  | 1                    |
| AT4G34110   | 1                 | 1                  | 1                    |
| AT4G34120   | 0                 | 1                  | 1                    |
| AT4G34135   | 0                 | 1                  | 1                    |
| AT4G34138   | 0                 | 1                  | 1                    |
| AT4G34160   | 0                 | 1                  | 1                    |
| AT4G34170   | 0                 | 1                  | 1                    |
| AT4G34230   | 0                 | 1                  | 1                    |
| AT4G34240   | 0                 | 1                  | 1                    |
| AT4G34250   | 0                 | 1                  | 1                    |
| AT4G34380   | 0                 | 1                  | 1                    |
| AT4G34390   | 0                 | 1                  | 1                    |
| AT4G34400   | 0                 | 1                  | 1                    |
| AT4G34410   | 1                 | 1                  | 1                    |

Appendix Table S3

| <b>Name</b> | <b>BES_target</b> | <b>BZR1_target</b> | <b>BESBZR_target</b> |
|-------------|-------------------|--------------------|----------------------|
| AT4G34480   | 1                 | 0                  | 1                    |
| AT4G34530   | 1                 | 0                  | 1                    |
| AT4G34710   | 0                 | 1                  | 1                    |
| AT4G34720   | 0                 | 1                  | 1                    |
| AT4G34760   | 0                 | 1                  | 1                    |
| AT4G34770   | 0                 | 1                  | 1                    |
| AT4G35000   | 1                 | 0                  | 1                    |
| AT4G35010   | 1                 | 0                  | 1                    |
| AT4G35090   | 0                 | 1                  | 1                    |
| AT4G35100   | 1                 | 1                  | 1                    |
| AT4G35110   | 1                 | 1                  | 1                    |
| AT4G35120   | 0                 | 1                  | 1                    |
| AT4G35180   | 0                 | 1                  | 1                    |
| AT4G35190   | 0                 | 1                  | 1                    |
| AT4G35230   | 0                 | 1                  | 1                    |
| AT4G35240   | 0                 | 1                  | 1                    |
| AT4G35480   | 0                 | 1                  | 1                    |
| AT4G35490   | 0                 | 1                  | 1                    |
| AT4G35500   | 0                 | 1                  | 1                    |
| AT4G35510   | 0                 | 1                  | 1                    |
| AT4G35520   | 0                 | 1                  | 1                    |
| AT4G35590   | 0                 | 1                  | 1                    |
| AT4G35600   | 0                 | 1                  | 1                    |
| AT4G35850   | 1                 | 0                  | 1                    |
| AT4G35920   | 0                 | 1                  | 1                    |
| AT4G35930   | 0                 | 1                  | 1                    |
| AT4G36010   | 0                 | 1                  | 1                    |
| AT4G36020   | 0                 | 1                  | 1                    |
| AT4G36030   | 1                 | 1                  | 1                    |
| AT4G36040   | 0                 | 1                  | 1                    |
| AT4G36050   | 0                 | 1                  | 1                    |
| AT4G36160   | 0                 | 1                  | 1                    |
| AT4G36170   | 1                 | 1                  | 1                    |
| AT4G36180   | 0                 | 1                  | 1                    |
| AT4G36210   | 0                 | 1                  | 1                    |
| AT4G36220   | 1                 | 1                  | 1                    |
| AT4G36230   | 0                 | 1                  | 1                    |
| AT4G36370   | 0                 | 1                  | 1                    |
| AT4G36380   | 1                 | 1                  | 1                    |
| AT4G36390   | 0                 | 1                  | 1                    |
| AT4G36648   | 0                 | 1                  | 1                    |
| AT4G36650   | 1                 | 1                  | 1                    |
| AT4G36670   | 0                 | 1                  | 1                    |
| AT4G36680   | 0                 | 1                  | 1                    |
| AT4G36700   | 0                 | 1                  | 1                    |
| AT4G36710   | 0                 | 1                  | 1                    |
| AT4G36770   | 0                 | 1                  | 1                    |
| AT4G36780   | 1                 | 1                  | 1                    |
| AT4G36790   | 0                 | 1                  | 1                    |
| AT4G36800   | 1                 | 1                  | 1                    |
| AT4G36810   | 0                 | 1                  | 1                    |

Appendix Table S3

| <b>Name</b> | <b>BES_target</b> | <b>BZR1_target</b> | <b>BESBZR_target</b> |
|-------------|-------------------|--------------------|----------------------|
| AT4G36820   | 0                 | 1                  | 1                    |
| AT4G36830   | 0                 | 1                  | 1                    |
| AT4G36910   | 0                 | 1                  | 1                    |
| AT4G36920   | 0                 | 1                  | 1                    |
| AT4G36925   | 0                 | 1                  | 1                    |
| AT4G36930   | 0                 | 1                  | 1                    |
| AT4G37070   | 1                 | 1                  | 1                    |
| AT4G37080   | 1                 | 1                  | 1                    |
| AT4G37100   | 1                 | 0                  | 1                    |
| AT4G37230   | 1                 | 1                  | 1                    |
| AT4G37235   | 0                 | 1                  | 1                    |
| AT4G37240   | 1                 | 1                  | 1                    |
| AT4G37250   | 1                 | 1                  | 1                    |
| AT4G37270   | 0                 | 1                  | 1                    |
| AT4G37320   | 1                 | 0                  | 1                    |
| AT4G37370   | 0                 | 1                  | 1                    |
| AT4G37380   | 0                 | 1                  | 1                    |
| AT4G37390   | 0                 | 1                  | 1                    |
| AT4G37420   | 1                 | 0                  | 1                    |
| AT4G37430   | 1                 | 0                  | 1                    |
| AT4G37432   | 1                 | 0                  | 1                    |
| AT4G37470   | 1                 | 0                  | 1                    |
| AT4G37540   | 1                 | 1                  | 1                    |
| AT4G37550   | 1                 | 1                  | 1                    |
| AT4G37590   | 0                 | 1                  | 1                    |
| AT4G37608   | 0                 | 1                  | 1                    |
| AT4G37610   | 0                 | 1                  | 1                    |
| AT4G37620   | 0                 | 1                  | 1                    |
| AT4G37690   | 1                 | 0                  | 1                    |
| AT4G37760   | 0                 | 1                  | 1                    |
| AT4G37770   | 0                 | 1                  | 1                    |
| AT4G37780   | 0                 | 1                  | 1                    |
| AT4G37790   | 0                 | 1                  | 1                    |
| AT4G37800   | 0                 | 1                  | 1                    |
| AT4G38460   | 0                 | 1                  | 1                    |
| AT4G38470   | 0                 | 1                  | 1                    |
| AT4G38480   | 0                 | 1                  | 1                    |
| AT4G38520   | 0                 | 1                  | 1                    |
| AT4G38530   | 0                 | 1                  | 1                    |
| AT4G38540   | 0                 | 1                  | 1                    |
| AT4G38550   | 0                 | 1                  | 1                    |
| AT4G38560   | 0                 | 1                  | 1                    |
| AT4G38620   | 0                 | 1                  | 1                    |
| AT4G38630   | 0                 | 1                  | 1                    |
| AT4G38730   | 0                 | 1                  | 1                    |
| AT4G38740   | 0                 | 1                  | 1                    |
| AT4G38810   | 0                 | 1                  | 1                    |
| AT4G38820   | 0                 | 1                  | 1                    |
| AT4G38850   | 0                 | 1                  | 1                    |
| AT4G38860   | 1                 | 1                  | 1                    |
| AT4G38900   | 1                 | 0                  | 1                    |

Appendix Table S3

| Name      | BES_target | BZR1_target | BESBZR_target |
|-----------|------------|-------------|---------------|
| AT4G38910 | 1          | 0           | 1             |
| AT4G38920 | 1          | 0           | 1             |
| AT4G39040 | 1          | 1           | 1             |
| AT4G39050 | 0          | 1           | 1             |
| AT4G39070 | 0          | 1           | 1             |
| AT4G39080 | 0          | 1           | 1             |
| AT4G39380 | 0          | 1           | 1             |
| AT4G39390 | 0          | 1           | 1             |
| AT4G39400 | 1          | 1           | 1             |
| AT4G39403 | 1          | 1           | 1             |
| AT4G39410 | 0          | 1           | 1             |
| AT4G39800 | 1          | 1           | 1             |
| AT4G39810 | 0          | 1           | 1             |
| AT4G39830 | 0          | 1           | 1             |
| AT4G39840 | 1          | 1           | 1             |
| AT4G39850 | 0          | 1           | 1             |
| AT4G40042 | 1          | 0           | 1             |
| AT4G40050 | 0          | 1           | 1             |
| AT4G40060 | 0          | 1           | 1             |
| AT4G40070 | 0          | 1           | 1             |
| AT5G01200 | 0          | 1           | 1             |
| AT5G01215 | 0          | 1           | 1             |
| AT5G01225 | 1          | 0           | 1             |
| AT5G01260 | 1          | 0           | 1             |
| AT5G01340 | 0          | 1           | 1             |
| AT5G01380 | 0          | 1           | 1             |
| AT5G01390 | 0          | 1           | 1             |
| AT5G01520 | 0          | 1           | 1             |
| AT5G01530 | 0          | 1           | 1             |
| AT5G01540 | 0          | 1           | 1             |
| AT5G01590 | 0          | 1           | 1             |
| AT5G01595 | 0          | 1           | 1             |
| AT5G01600 | 0          | 1           | 1             |
| AT5G01630 | 1          | 0           | 1             |
| AT5G01715 | 0          | 1           | 1             |
| AT5G01730 | 0          | 1           | 1             |
| AT5G01740 | 0          | 1           | 1             |
| AT5G01800 | 0          | 1           | 1             |
| AT5G01810 | 0          | 1           | 1             |
| AT5G01820 | 0          | 1           | 1             |
| AT5G01840 | 0          | 1           | 1             |
| AT5G01850 | 0          | 1           | 1             |
| AT5G01870 | 0          | 1           | 1             |
| AT5G01880 | 0          | 1           | 1             |
| AT5G02010 | 1          | 0           | 1             |
| AT5G02020 | 1          | 1           | 1             |
| AT5G02025 | 0          | 1           | 1             |
| AT5G02180 | 0          | 1           | 1             |
| AT5G02190 | 1          | 1           | 1             |
| AT5G02200 | 1          | 1           | 1             |
| AT5G02440 | 0          | 1           | 1             |



Appendix Table S3

| Name      | BES_target | BZR1_target | BESBZR_target |
|-----------|------------|-------------|---------------|
| AT5G02450 | 0          | 1           | 1             |
| AT5G02460 | 0          | 1           | 1             |
| AT5G02490 | 1          | 0           | 1             |
| AT5G02530 | 0          | 1           | 1             |
| AT5G02540 | 0          | 1           | 1             |
| AT5G02550 | 0          | 1           | 1             |
| AT5G02615 | 0          | 1           | 1             |
| AT5G02620 | 0          | 1           | 1             |
| AT5G02630 | 0          | 1           | 1             |
| AT5G02730 | 1          | 0           | 1             |
| AT5G02750 | 0          | 1           | 1             |
| AT5G02760 | 0          | 1           | 1             |
| AT5G02770 | 0          | 1           | 1             |
| AT5G02920 | 1          | 0           | 1             |
| AT5G02940 | 0          | 1           | 1             |
| AT5G02950 | 0          | 1           | 1             |
| AT5G03070 | 1          | 0           | 1             |
| AT5G03080 | 1          | 0           | 1             |
| AT5G03100 | 0          | 1           | 1             |
| AT5G03110 | 0          | 1           | 1             |
| AT5G03140 | 1          | 1           | 1             |
| AT5G03150 | 0          | 1           | 1             |
| AT5G03210 | 1          | 1           | 1             |
| AT5G03220 | 0          | 1           | 1             |
| AT5G03350 | 0          | 1           | 1             |
| AT5G03360 | 0          | 1           | 1             |
| AT5G03370 | 0          | 1           | 1             |
| AT5G03380 | 0          | 1           | 1             |
| AT5G03415 | 1          | 0           | 1             |
| AT5G03630 | 1          | 0           | 1             |
| AT5G03700 | 0          | 1           | 1             |
| AT5G03705 | 0          | 1           | 1             |
| AT5G03720 | 1          | 0           | 1             |
| AT5G03730 | 0          | 1           | 1             |
| AT5G03750 | 1          | 1           | 1             |
| AT5G03760 | 0          | 1           | 1             |
| AT5G03770 | 0          | 1           | 1             |
| AT5G03980 | 1          | 0           | 1             |
| AT5G04130 | 0          | 1           | 1             |
| AT5G04140 | 0          | 1           | 1             |
| AT5G04190 | 0          | 1           | 1             |
| AT5G04200 | 1          | 1           | 1             |
| AT5G04290 | 0          | 1           | 1             |
| AT5G04310 | 0          | 1           | 1             |
| AT5G04320 | 0          | 1           | 1             |
| AT5G04330 | 0          | 1           | 1             |
| AT5G04340 | 0          | 1           | 1             |
| AT5G04347 | 0          | 1           | 1             |
| AT5G04400 | 0          | 1           | 1             |
| AT5G04410 | 0          | 1           | 1             |
| AT5G04420 | 0          | 1           | 1             |

Appendix Table S3

| Name      | BES_target | BZR1_target | BESBZR_target |
|-----------|------------|-------------|---------------|
| AT5G04470 | 1          | 1           | 1             |
| AT5G04480 | 0          | 1           | 1             |
| AT5G04520 | 1          | 0           | 1             |
| AT5G04560 | 0          | 1           | 1             |
| AT5G04590 | 1          | 1           | 1             |
| AT5G04760 | 0          | 1           | 1             |
| AT5G04770 | 1          | 1           | 1             |
| AT5G04780 | 0          | 1           | 1             |
| AT5G04940 | 0          | 1           | 1             |
| AT5G04950 | 0          | 1           | 1             |
| AT5G05140 | 0          | 1           | 1             |
| AT5G05150 | 0          | 1           | 1             |
| AT5G05180 | 0          | 1           | 1             |
| AT5G05190 | 0          | 1           | 1             |
| AT5G05435 | 0          | 1           | 1             |
| AT5G05440 | 1          | 1           | 1             |
| AT5G05450 | 1          | 0           | 1             |
| AT5G05590 | 0          | 1           | 1             |
| AT5G05598 | 0          | 1           | 1             |
| AT5G05600 | 0          | 1           | 1             |
| AT5G05610 | 0          | 1           | 1             |
| AT5G05680 | 0          | 1           | 1             |
| AT5G05690 | 1          | 1           | 1             |
| AT5G05700 | 0          | 1           | 1             |
| AT5G05870 | 1          | 0           | 1             |
| AT5G06080 | 0          | 1           | 1             |
| AT5G06090 | 1          | 1           | 1             |
| AT5G06290 | 0          | 1           | 1             |
| AT5G06300 | 0          | 1           | 1             |
| AT5G06310 | 0          | 1           | 1             |
| AT5G06370 | 0          | 1           | 1             |
| AT5G06380 | 0          | 1           | 1             |
| AT5G06390 | 0          | 1           | 1             |
| AT5G06530 | 0          | 1           | 1             |
| AT5G06540 | 0          | 1           | 1             |
| AT5G06550 | 1          | 0           | 1             |
| AT5G06570 | 0          | 1           | 1             |
| AT5G06580 | 0          | 1           | 1             |
| AT5G06590 | 0          | 1           | 1             |
| AT5G06620 | 1          | 0           | 1             |
| AT5G06640 | 1          | 0           | 1             |
| AT5G06670 | 1          | 0           | 1             |
| AT5G06700 | 0          | 1           | 1             |
| AT5G06710 | 0          | 1           | 1             |
| AT5G06850 | 0          | 1           | 1             |
| AT5G06865 | 0          | 1           | 1             |
| AT5G06870 | 0          | 1           | 1             |
| AT5G06980 | 1          | 0           | 1             |
| AT5G07010 | 1          | 0           | 1             |
| AT5G07070 | 0          | 1           | 1             |
| AT5G07080 | 0          | 1           | 1             |

Appendix Table S3

| Name      | BES_target | BZR1_target | BESBZR_target |
|-----------|------------|-------------|---------------|
| AT5G07090 | 0          | 1           | 1             |
| AT5G07190 | 0          | 1           | 1             |
| AT5G07200 | 0          | 1           | 1             |
| AT5G07220 | 0          | 1           | 1             |
| AT5G07225 | 0          | 1           | 1             |
| AT5G07280 | 1          | 0           | 1             |
| AT5G07380 | 1          | 0           | 1             |
| AT5G07430 | 0          | 1           | 1             |
| AT5G07440 | 0          | 1           | 1             |
| AT5G07570 | 0          | 1           | 1             |
| AT5G07580 | 1          | 1           | 1             |
| AT5G07590 | 0          | 1           | 1             |
| AT5G07760 | 0          | 1           | 1             |
| AT5G08130 | 0          | 1           | 1             |
| AT5G08139 | 1          | 1           | 1             |
| AT5G08141 | 0          | 1           | 1             |
| AT5G08150 | 0          | 1           | 1             |
| AT5G08160 | 0          | 1           | 1             |
| AT5G08170 | 1          | 0           | 1             |
| AT5G08230 | 0          | 1           | 1             |
| AT5G08240 | 0          | 1           | 1             |
| AT5G08250 | 0          | 1           | 1             |
| AT5G08280 | 1          | 0           | 1             |
| AT5G08320 | 0          | 1           | 1             |
| AT5G08330 | 0          | 1           | 1             |
| AT5G08510 | 1          | 0           | 1             |
| AT5G08520 | 0          | 1           | 1             |
| AT5G08530 | 0          | 1           | 1             |
| AT5G08780 | 0          | 1           | 1             |
| AT5G08790 | 1          | 1           | 1             |
| AT5G09210 | 0          | 1           | 1             |
| AT5G09430 | 0          | 1           | 1             |
| AT5G09440 | 1          | 1           | 1             |
| AT5G09460 | 1          | 0           | 1             |
| AT5G09470 | 0          | 1           | 1             |
| AT5G09610 | 0          | 1           | 1             |
| AT5G09620 | 0          | 1           | 1             |
| AT5G09630 | 0          | 1           | 1             |
| AT5G09805 | 0          | 1           | 1             |
| AT5G09810 | 1          | 1           | 1             |
| AT5G09820 | 0          | 1           | 1             |
| AT5G09850 | 0          | 1           | 1             |
| AT5G09860 | 0          | 1           | 1             |
| AT5G10070 | 1          | 0           | 1             |
| AT5G10170 | 0          | 1           | 1             |
| AT5G10180 | 0          | 1           | 1             |
| AT5G10280 | 0          | 1           | 1             |
| AT5G10290 | 1          | 1           | 1             |
| AT5G10300 | 0          | 1           | 1             |
| AT5G10310 | 0          | 1           | 1             |
| AT5G10320 | 0          | 1           | 1             |

Appendix Table S3

| Name      | BES_target | BZR1_target | BESBZR_target |
|-----------|------------|-------------|---------------|
| AT5G10440 | 0          | 1           | 1             |
| AT5G10450 | 0          | 1           | 1             |
| AT5G10455 | 0          | 1           | 1             |
| AT5G10550 | 0          | 1           | 1             |
| AT5G10560 | 0          | 1           | 1             |
| AT5G10820 | 1          | 1           | 1             |
| AT5G10830 | 0          | 1           | 1             |
| AT5G10910 | 0          | 1           | 1             |
| AT5G10920 | 0          | 1           | 1             |
| AT5G10930 | 0          | 1           | 1             |
| AT5G11050 | 0          | 1           | 1             |
| AT5G11060 | 1          | 1           | 1             |
| AT5G11070 | 0          | 1           | 1             |
| AT5G11080 | 0          | 1           | 1             |
| AT5G11090 | 0          | 1           | 1             |
| AT5G11100 | 0          | 1           | 1             |
| AT5G11300 | 0          | 1           | 1             |
| AT5G11310 | 0          | 1           | 1             |
| AT5G11410 | 0          | 1           | 1             |
| AT5G11420 | 0          | 1           | 1             |
| AT5G11430 | 0          | 1           | 1             |
| AT5G11460 | 0          | 1           | 1             |
| AT5G11470 | 0          | 1           | 1             |
| AT5G11620 | 1          | 0           | 1             |
| AT5G11630 | 0          | 1           | 1             |
| AT5G11640 | 0          | 1           | 1             |
| AT5G11650 | 0          | 1           | 1             |
| AT5G11700 | 1          | 0           | 1             |
| AT5G11730 | 0          | 1           | 1             |
| AT5G11740 | 1          | 1           | 1             |
| AT5G11750 | 0          | 1           | 1             |
| AT5G11950 | 0          | 1           | 1             |
| AT5G11960 | 0          | 1           | 1             |
| AT5G11970 | 0          | 1           | 1             |
| AT5G11977 | 0          | 1           | 1             |
| AT5G12040 | 0          | 1           | 1             |
| AT5G12050 | 1          | 1           | 1             |
| AT5G12330 | 0          | 1           | 1             |
| AT5G12340 | 0          | 1           | 1             |
| AT5G12350 | 0          | 1           | 1             |
| AT5G12930 | 1          | 1           | 1             |
| AT5G12940 | 0          | 1           | 1             |
| AT5G12980 | 1          | 0           | 1             |
| AT5G13080 | 1          | 0           | 1             |
| AT5G13100 | 1          | 0           | 1             |
| AT5G13170 | 0          | 1           | 1             |
| AT5G13180 | 0          | 1           | 1             |
| AT5G13190 | 0          | 1           | 1             |
| AT5G13200 | 0          | 1           | 1             |
| AT5G13210 | 0          | 1           | 1             |
| AT5G13220 | 0          | 1           | 1             |

Appendix Table S3

| Name      | BES_target | BZR1_target | BESBZR_target |
|-----------|------------|-------------|---------------|
| AT5G13225 | 0          | 1           | 1             |
| AT5G13330 | 0          | 1           | 1             |
| AT5G13340 | 0          | 1           | 1             |
| AT5G13400 | 1          | 0           | 1             |
| AT5G13550 | 1          | 0           | 1             |
| AT5G13630 | 1          | 0           | 1             |
| AT5G13700 | 1          | 1           | 1             |
| AT5G13710 | 1          | 1           | 1             |
| AT5G13720 | 0          | 1           | 1             |
| AT5G13730 | 1          | 1           | 1             |
| AT5G13740 | 0          | 1           | 1             |
| AT5G13750 | 1          | 1           | 1             |
| AT5G13760 | 1          | 1           | 1             |
| AT5G13840 | 1          | 0           | 1             |
| AT5G14105 | 0          | 1           | 1             |
| AT5G14110 | 0          | 1           | 1             |
| AT5G14120 | 0          | 1           | 1             |
| AT5G14130 | 0          | 1           | 1             |
| AT5G14210 | 0          | 1           | 1             |
| AT5G14220 | 0          | 1           | 1             |
| AT5G14230 | 0          | 1           | 1             |
| AT5G14640 | 0          | 1           | 1             |
| AT5G14650 | 0          | 1           | 1             |
| AT5G14690 | 0          | 1           | 1             |
| AT5G14700 | 0          | 1           | 1             |
| AT5G14710 | 0          | 1           | 1             |
| AT5G14800 | 1          | 0           | 1             |
| AT5G14840 | 1          | 0           | 1             |
| AT5G14910 | 0          | 1           | 1             |
| AT5G14920 | 0          | 1           | 1             |
| AT5G15310 | 1          | 0           | 1             |
| AT5G15330 | 1          | 0           | 1             |
| AT5G15340 | 0          | 1           | 1             |
| AT5G15350 | 0          | 1           | 1             |
| AT5G15360 | 1          | 1           | 1             |
| AT5G15410 | 1          | 1           | 1             |
| AT5G15420 | 0          | 1           | 1             |
| AT5G15430 | 0          | 1           | 1             |
| AT5G15580 | 0          | 1           | 1             |
| AT5G15600 | 0          | 1           | 1             |
| AT5G15640 | 0          | 1           | 1             |
| AT5G15650 | 0          | 1           | 1             |
| AT5G15750 | 1          | 0           | 1             |
| AT5G15820 | 1          | 0           | 1             |
| AT5G15850 | 0          | 1           | 1             |
| AT5G15860 | 0          | 1           | 1             |
| AT5G15940 | 0          | 1           | 1             |
| AT5G15950 | 0          | 1           | 1             |
| AT5G15980 | 1          | 0           | 1             |
| AT5G16000 | 0          | 1           | 1             |
| AT5G16010 | 0          | 1           | 1             |

Appendix Table S3

| <b>Name</b> | <b>BES_target</b> | <b>BZR1_target</b> | <b>BESBZR_target</b> |
|-------------|-------------------|--------------------|----------------------|
| AT5G16023   | 0                 | 1                  | 1                    |
| AT5G16030   | 1                 | 1                  | 1                    |
| AT5G16110   | 0                 | 1                  | 1                    |
| AT5G16120   | 0                 | 1                  | 1                    |
| AT5G16160   | 0                 | 1                  | 1                    |
| AT5G16170   | 0                 | 1                  | 1                    |
| AT5G16180   | 0                 | 1                  | 1                    |
| AT5G16190   | 0                 | 1                  | 1                    |
| AT5G16200   | 1                 | 1                  | 1                    |
| AT5G16210   | 0                 | 1                  | 1                    |
| AT5G16300   | 1                 | 0                  | 1                    |
| AT5G16370   | 1                 | 1                  | 1                    |
| AT5G16375   | 1                 | 1                  | 1                    |
| AT5G16380   | 1                 | 0                  | 1                    |
| AT5G16560   | 0                 | 1                  | 1                    |
| AT5G16570   | 0                 | 1                  | 1                    |
| AT5G16750   | 1                 | 0                  | 1                    |
| AT5G16760   | 1                 | 0                  | 1                    |
| AT5G17165   | 1                 | 0                  | 1                    |
| AT5G17230   | 0                 | 1                  | 1                    |
| AT5G17240   | 0                 | 1                  | 1                    |
| AT5G17480   | 0                 | 1                  | 1                    |
| AT5G17490   | 0                 | 1                  | 1                    |
| AT5G17500   | 0                 | 1                  | 1                    |
| AT5G17590   | 0                 | 1                  | 1                    |
| AT5G17600   | 0                 | 1                  | 1                    |
| AT5G17760   | 0                 | 1                  | 1                    |
| AT5G17770   | 0                 | 1                  | 1                    |
| AT5G17790   | 0                 | 1                  | 1                    |
| AT5G17800   | 1                 | 1                  | 1                    |
| AT5G17850   | 0                 | 1                  | 1                    |
| AT5G17860   | 1                 | 1                  | 1                    |
| AT5G17870   | 0                 | 1                  | 1                    |
| AT5G17980   | 1                 | 0                  | 1                    |
| AT5G18050   | 1                 | 0                  | 1                    |
| AT5G18070   | 0                 | 1                  | 1                    |
| AT5G18080   | 1                 | 1                  | 1                    |
| AT5G18120   | 0                 | 1                  | 1                    |
| AT5G18130   | 0                 | 1                  | 1                    |
| AT5G18140   | 0                 | 1                  | 1                    |
| AT5G18280   | 0                 | 1                  | 1                    |
| AT5G18290   | 0                 | 1                  | 1                    |
| AT5G18300   | 0                 | 1                  | 1                    |
| AT5G18310   | 0                 | 1                  | 1                    |
| AT5G18360   | 1                 | 0                  | 1                    |
| AT5G18560   | 1                 | 1                  | 1                    |
| AT5G18570   | 0                 | 1                  | 1                    |
| AT5G18590   | 1                 | 0                  | 1                    |
| AT5G18830   | 0                 | 1                  | 1                    |
| AT5G18840   | 0                 | 1                  | 1                    |
| AT5G19060   | 1                 | 0                  | 1                    |

Appendix Table S3

| Name      | BES_target | BZR1_target | BESBZR_target |
|-----------|------------|-------------|---------------|
| AT5G19090 | 0          | 1           | 1             |
| AT5G19095 | 0          | 1           | 1             |
| AT5G19110 | 0          | 1           | 1             |
| AT5G19120 | 1          | 1           | 1             |
| AT5G19130 | 0          | 1           | 1             |
| AT5G19140 | 0          | 1           | 1             |
| AT5G19150 | 0          | 1           | 1             |
| AT5G19160 | 0          | 1           | 1             |
| AT5G19220 | 0          | 1           | 1             |
| AT5G19230 | 0          | 1           | 1             |
| AT5G19770 | 1          | 0           | 1             |
| AT5G19780 | 1          | 0           | 1             |
| AT5G19930 | 1          | 0           | 1             |
| AT5G19970 | 1          | 0           | 1             |
| AT5G20045 | 0          | 1           | 1             |
| AT5G20050 | 0          | 1           | 1             |
| AT5G20140 | 0          | 1           | 1             |
| AT5G20150 | 0          | 1           | 1             |
| AT5G20170 | 0          | 1           | 1             |
| AT5G20180 | 1          | 1           | 1             |
| AT5G20190 | 1          | 1           | 1             |
| AT5G20240 | 0          | 1           | 1             |
| AT5G20250 | 1          | 1           | 1             |
| AT5G20660 | 0          | 1           | 1             |
| AT5G20670 | 0          | 1           | 1             |
| AT5G20690 | 0          | 1           | 1             |
| AT5G20700 | 0          | 1           | 1             |
| AT5G20710 | 0          | 1           | 1             |
| AT5G20960 | 1          | 0           | 1             |
| AT5G21080 | 0          | 1           | 1             |
| AT5G21090 | 0          | 1           | 1             |
| AT5G21100 | 0          | 1           | 1             |
| AT5G21105 | 0          | 1           | 1             |
| AT5G21110 | 0          | 1           | 1             |
| AT5G21280 | 0          | 1           | 1             |
| AT5G21430 | 0          | 1           | 1             |
| AT5G21482 | 1          | 1           | 1             |
| AT5G21535 | 0          | 1           | 1             |
| AT5G21940 | 1          | 0           | 1             |
| AT5G21950 | 0          | 1           | 1             |
| AT5G21960 | 0          | 1           | 1             |
| AT5G21970 | 0          | 1           | 1             |
| AT5G21990 | 0          | 1           | 1             |
| AT5G22270 | 0          | 1           | 1             |
| AT5G22280 | 0          | 1           | 1             |
| AT5G22730 | 1          | 1           | 1             |
| AT5G22740 | 1          | 1           | 1             |
| AT5G22750 | 0          | 1           | 1             |
| AT5G22780 | 1          | 0           | 1             |
| AT5G22930 | 0          | 1           | 1             |
| AT5G22940 | 1          | 1           | 1             |

Appendix Table S3

| Name      | BES_target | BZR1_target | BESBZR_target |
|-----------|------------|-------------|---------------|
| AT5G22950 | 0          | 1           | 1             |
| AT5G23200 | 0          | 1           | 1             |
| AT5G23210 | 0          | 1           | 1             |
| AT5G23212 | 0          | 1           | 1             |
| AT5G23280 | 1          | 0           | 1             |
| AT5G23730 | 1          | 0           | 1             |
| AT5G23840 | 0          | 1           | 1             |
| AT5G23850 | 0          | 1           | 1             |
| AT5G23860 | 0          | 1           | 1             |
| AT5G23955 | 1          | 0           | 1             |
| AT5G23970 | 0          | 1           | 1             |
| AT5G23980 | 0          | 1           | 1             |
| AT5G23990 | 1          | 1           | 1             |
| AT5G24020 | 0          | 1           | 1             |
| AT5G24030 | 0          | 1           | 1             |
| AT5G24040 | 0          | 1           | 1             |
| AT5G24210 | 0          | 1           | 1             |
| AT5G24220 | 0          | 1           | 1             |
| AT5G24250 | 1          | 0           | 1             |
| AT5G24470 | 1          | 1           | 1             |
| AT5G24480 | 0          | 1           | 1             |
| AT5G24520 | 0          | 1           | 1             |
| AT5G24530 | 1          | 1           | 1             |
| AT5G24540 | 0          | 1           | 1             |
| AT5G24760 | 0          | 1           | 1             |
| AT5G24770 | 1          | 1           | 1             |
| AT5G24915 | 0          | 1           | 1             |
| AT5G24920 | 0          | 1           | 1             |
| AT5G25100 | 1          | 0           | 1             |
| AT5G25150 | 0          | 1           | 1             |
| AT5G25160 | 0          | 1           | 1             |
| AT5G25190 | 0          | 1           | 1             |
| AT5G25200 | 0          | 1           | 1             |
| AT5G25205 | 0          | 1           | 1             |
| AT5G25210 | 0          | 1           | 1             |
| AT5G25220 | 0          | 1           | 1             |
| AT5G25270 | 0          | 1           | 1             |
| AT5G25280 | 0          | 1           | 1             |
| AT5G25290 | 0          | 1           | 1             |
| AT5G25340 | 0          | 1           | 1             |
| AT5G25350 | 0          | 1           | 1             |
| AT5G25360 | 0          | 1           | 1             |
| AT5G25510 | 1          | 0           | 1             |
| AT5G25810 | 0          | 1           | 1             |
| AT5G25820 | 0          | 1           | 1             |
| AT5G25920 | 0          | 1           | 1             |
| AT5G26220 | 0          | 1           | 1             |
| AT5G26230 | 0          | 1           | 1             |
| AT5G26330 | 0          | 1           | 1             |
| AT5G26340 | 0          | 1           | 1             |
| AT5G26345 | 0          | 1           | 1             |



Appendix Table S3

| Name      | BES_target | BZR1_target | BESBZR_target |
|-----------|------------|-------------|---------------|
| AT5G26980 | 1          | 0           | 1             |
| AT5G27030 | 1          | 1           | 1             |
| AT5G27035 | 0          | 1           | 1             |
| AT5G27060 | 1          | 0           | 1             |
| AT5G27240 | 1          | 0           | 1             |
| AT5G27930 | 1          | 0           | 1             |
| AT5G27965 | 1          | 0           | 1             |
| AT5G28053 | 1          | 0           | 1             |
| AT5G28143 | 0          | 1           | 1             |
| AT5G28145 | 0          | 1           | 1             |
| AT5G28232 | 1          | 0           | 1             |
| AT5G28235 | 1          | 0           | 1             |
| AT5G28600 | 1          | 0           | 1             |
| AT5G28650 | 1          | 0           | 1             |
| AT5G28770 | 0          | 1           | 1             |
| AT5G28773 | 0          | 1           | 1             |
| AT5G28930 | 1          | 0           | 1             |
| AT5G29022 | 1          | 0           | 1             |
| AT5G29060 | 1          | 0           | 1             |
| AT5G29070 | 1          | 0           | 1             |
| AT5G29337 | 1          | 0           | 1             |
| AT5G29380 | 1          | 0           | 1             |
| AT5G30428 | 1          | 0           | 1             |
| AT5G31662 | 1          | 0           | 1             |
| AT5G32404 | 1          | 0           | 1             |
| AT5G32516 | 1          | 0           | 1             |
| AT5G32518 | 1          | 0           | 1             |
| AT5G32593 | 1          | 0           | 1             |
| AT5G32595 | 1          | 0           | 1             |
| AT5G32623 | 1          | 0           | 1             |
| AT5G33204 | 1          | 0           | 1             |
| AT5G33250 | 1          | 0           | 1             |
| AT5G33252 | 1          | 0           | 1             |
| AT5G33355 | 1          | 0           | 1             |
| AT5G33391 | 1          | 0           | 1             |
| AT5G33420 | 1          | 0           | 1             |
| AT5G33990 | 1          | 0           | 1             |
| AT5G34623 | 1          | 0           | 1             |
| AT5G34834 | 1          | 0           | 1             |
| AT5G34841 | 1          | 0           | 1             |
| AT5G34865 | 1          | 0           | 1             |
| AT5G35052 | 1          | 0           | 1             |
| AT5G35320 | 1          | 0           | 1             |
| AT5G35405 | 0          | 1           | 1             |
| AT5G35407 | 1          | 1           | 1             |
| AT5G35410 | 0          | 1           | 1             |
| AT5G35615 | 1          | 0           | 1             |
| AT5G37210 | 1          | 0           | 1             |
| AT5G37460 | 1          | 0           | 1             |
| AT5G37540 | 1          | 0           | 1             |
| AT5G37550 | 1          | 0           | 1             |

Appendix Table S3

| Name      | BES_target | BZR1_target | BESBZR_target |
|-----------|------------|-------------|---------------|
| AT5G37790 | 1          | 0           | 1             |
| AT5G37875 | 1          | 0           | 1             |
| AT5G38220 | 0          | 1           | 1             |
| AT5G38740 | 1          | 0           | 1             |
| AT5G38750 | 1          | 0           | 1             |
| AT5G38975 | 0          | 1           | 1             |
| AT5G38980 | 0          | 1           | 1             |
| AT5G39040 | 0          | 1           | 1             |
| AT5G39050 | 0          | 1           | 1             |
| AT5G39580 | 0          | 1           | 1             |
| AT5G39590 | 0          | 1           | 1             |
| AT5G39600 | 0          | 1           | 1             |
| AT5G39610 | 0          | 1           | 1             |
| AT5G40340 | 1          | 0           | 1             |
| AT5G40370 | 0          | 1           | 1             |
| AT5G40380 | 0          | 1           | 1             |
| AT5G40390 | 0          | 1           | 1             |
| AT5G40395 | 1          | 0           | 1             |
| AT5G40405 | 1          | 0           | 1             |
| AT5G40450 | 0          | 1           | 1             |
| AT5G40460 | 0          | 1           | 1             |
| AT5G40470 | 0          | 1           | 1             |
| AT5G40790 | 1          | 1           | 1             |
| AT5G40890 | 0          | 1           | 1             |
| AT5G40900 | 0          | 1           | 1             |
| AT5G41170 | 1          | 0           | 1             |
| AT5G41400 | 0          | 1           | 1             |
| AT5G41410 | 0          | 1           | 1             |
| AT5G41590 | 0          | 1           | 1             |
| AT5G41600 | 1          | 1           | 1             |
| AT5G41730 | 0          | 1           | 1             |
| AT5G41740 | 0          | 1           | 1             |
| AT5G41770 | 0          | 1           | 1             |
| AT5G41780 | 0          | 1           | 1             |
| AT5G41790 | 0          | 1           | 1             |
| AT5G42040 | 0          | 1           | 1             |
| AT5G42050 | 0          | 1           | 1             |
| AT5G42060 | 0          | 1           | 1             |
| AT5G42100 | 0          | 1           | 1             |
| AT5G42110 | 0          | 1           | 1             |
| AT5G42400 | 1          | 0           | 1             |
| AT5G42490 | 1          | 0           | 1             |
| AT5G42650 | 1          | 0           | 1             |
| AT5G42940 | 0          | 1           | 1             |
| AT5G43270 | 0          | 1           | 1             |
| AT5G43280 | 0          | 1           | 1             |
| AT5G43330 | 1          | 0           | 1             |
| AT5G43410 | 1          | 0           | 1             |
| AT5G43440 | 1          | 0           | 1             |
| AT5G43755 | 0          | 1           | 1             |
| AT5G43760 | 0          | 1           | 1             |

Appendix Table S3

| Name      | BES_target | BZR1_target | BESBZR_target |
|-----------|------------|-------------|---------------|
| AT5G44060 | 0          | 1           | 1             |
| AT5G44070 | 0          | 1           | 1             |
| AT5G44120 | 0          | 1           | 1             |
| AT5G44130 | 0          | 1           | 1             |
| AT5G44210 | 0          | 1           | 1             |
| AT5G44220 | 0          | 1           | 1             |
| AT5G44410 | 1          | 0           | 1             |
| AT5G44440 | 1          | 0           | 1             |
| AT5G44510 | 1          | 0           | 1             |
| AT5G44574 | 0          | 1           | 1             |
| AT5G44575 | 0          | 1           | 1             |
| AT5G44578 | 0          | 1           | 1             |
| AT5G44580 | 0          | 1           | 1             |
| AT5G44582 | 0          | 1           | 1             |
| AT5G44590 | 0          | 1           | 1             |
| AT5G44600 | 0          | 1           | 1             |
| AT5G45095 | 0          | 1           | 1             |
| AT5G45100 | 0          | 1           | 1             |
| AT5G45105 | 0          | 1           | 1             |
| AT5G45330 | 0          | 1           | 1             |
| AT5G45340 | 0          | 1           | 1             |
| AT5G45350 | 0          | 1           | 1             |
| AT5G45573 | 1          | 0           | 1             |
| AT5G45580 | 1          | 0           | 1             |
| AT5G45590 | 1          | 0           | 1             |
| AT5G45990 | 1          | 0           | 1             |
| AT5G46040 | 0          | 1           | 1             |
| AT5G46050 | 0          | 1           | 1             |
| AT5G46060 | 0          | 1           | 1             |
| AT5G46170 | 1          | 0           | 1             |
| AT5G46325 | 0          | 1           | 1             |
| AT5G46330 | 0          | 1           | 1             |
| AT5G46500 | 0          | 1           | 1             |
| AT5G46510 | 0          | 1           | 1             |
| AT5G46680 | 0          | 1           | 1             |
| AT5G46690 | 0          | 1           | 1             |
| AT5G46820 | 0          | 1           | 1             |
| AT5G46830 | 0          | 1           | 1             |
| AT5G46840 | 0          | 1           | 1             |
| AT5G46900 | 0          | 1           | 1             |
| AT5G46910 | 0          | 1           | 1             |
| AT5G46915 | 0          | 1           | 1             |
| AT5G47220 | 0          | 1           | 1             |
| AT5G47225 | 0          | 1           | 1             |
| AT5G47230 | 0          | 1           | 1             |
| AT5G47240 | 0          | 1           | 1             |
| AT5G47320 | 0          | 1           | 1             |
| AT5G47330 | 0          | 1           | 1             |
| AT5G47360 | 0          | 1           | 1             |
| AT5G47370 | 1          | 1           | 1             |
| AT5G47380 | 0          | 1           | 1             |

Appendix Table S3

| Name      | BES_target | BZR1_target | BESBZR_target |
|-----------|------------|-------------|---------------|
| AT5G47610 | 0          | 1           | 1             |
| AT5G47620 | 0          | 1           | 1             |
| AT5G47760 | 1          | 0           | 1             |
| AT5G48030 | 1          | 0           | 1             |
| AT5G48140 | 0          | 1           | 1             |
| AT5G48150 | 0          | 1           | 1             |
| AT5G48160 | 0          | 1           | 1             |
| AT5G48410 | 0          | 1           | 1             |
| AT5G48420 | 0          | 1           | 1             |
| AT5G48530 | 0          | 1           | 1             |
| AT5G48540 | 0          | 1           | 1             |
| AT5G48543 | 0          | 1           | 1             |
| AT5G48830 | 1          | 0           | 1             |
| AT5G48970 | 1          | 0           | 1             |
| AT5G49030 | 1          | 0           | 1             |
| AT5G49090 | 1          | 1           | 1             |
| AT5G49100 | 1          | 1           | 1             |
| AT5G49320 | 0          | 1           | 1             |
| AT5G49330 | 0          | 1           | 1             |
| AT5G49340 | 0          | 1           | 1             |
| AT5G49350 | 0          | 1           | 1             |
| AT5G49360 | 0          | 1           | 1             |
| AT5G49370 | 0          | 1           | 1             |
| AT5G49470 | 0          | 1           | 1             |
| AT5G49480 | 0          | 1           | 1             |
| AT5G49510 | 0          | 1           | 1             |
| AT5G49520 | 1          | 1           | 1             |
| AT5G49700 | 0          | 1           | 1             |
| AT5G49710 | 0          | 1           | 1             |
| AT5G49740 | 0          | 1           | 1             |
| AT5G49743 | 0          | 1           | 1             |
| AT5G49746 | 0          | 1           | 1             |
| AT5G49750 | 0          | 1           | 1             |
| AT5G50150 | 0          | 1           | 1             |
| AT5G50160 | 0          | 1           | 1             |
| AT5G50360 | 1          | 0           | 1             |
| AT5G50380 | 0          | 1           | 1             |
| AT5G50390 | 0          | 1           | 1             |
| AT5G50420 | 1          | 0           | 1             |
| AT5G50740 | 0          | 1           | 1             |
| AT5G50940 | 0          | 1           | 1             |
| AT5G50950 | 0          | 1           | 1             |
| AT5G51060 | 0          | 1           | 1             |
| AT5G51070 | 0          | 1           | 1             |
| AT5G51190 | 1          | 1           | 1             |
| AT5G51195 | 0          | 1           | 1             |
| AT5G51310 | 1          | 0           | 1             |
| AT5G51330 | 1          | 1           | 1             |
| AT5G51340 | 1          | 1           | 1             |
| AT5G51380 | 1          | 0           | 1             |
| AT5G51450 | 0          | 1           | 1             |

Appendix Table S3

| Name      | BES_target | BZR1_target | BESBZR_target |
|-----------|------------|-------------|---------------|
| AT5G51460 | 0          | 1           | 1             |
| AT5G51545 | 0          | 1           | 1             |
| AT5G51550 | 0          | 1           | 1             |
| AT5G51560 | 0          | 1           | 1             |
| AT5G51760 | 0          | 1           | 1             |
| AT5G51770 | 0          | 1           | 1             |
| AT5G51800 | 0          | 1           | 1             |
| AT5G51810 | 0          | 1           | 1             |
| AT5G52055 | 0          | 1           | 1             |
| AT5G52060 | 1          | 1           | 1             |
| AT5G52065 | 1          | 0           | 1             |
| AT5G52090 | 1          | 0           | 1             |
| AT5G52390 | 0          | 1           | 1             |
| AT5G52400 | 0          | 1           | 1             |
| AT5G52510 | 1          | 0           | 1             |
| AT5G52820 | 0          | 1           | 1             |
| AT5G52830 | 0          | 1           | 1             |
| AT5G52882 | 0          | 1           | 1             |
| AT5G52890 | 0          | 1           | 1             |
| AT5G52900 | 0          | 1           | 1             |
| AT5G52910 | 0          | 1           | 1             |
| AT5G52980 | 1          | 0           | 1             |
| AT5G52990 | 1          | 0           | 1             |
| AT5G53050 | 0          | 1           | 1             |
| AT5G53060 | 0          | 1           | 1             |
| AT5G53190 | 0          | 1           | 1             |
| AT5G53200 | 0          | 1           | 1             |
| AT5G53280 | 1          | 1           | 1             |
| AT5G53290 | 0          | 1           | 1             |
| AT5G53300 | 0          | 1           | 1             |
| AT5G53370 | 1          | 0           | 1             |
| AT5G53400 | 0          | 1           | 1             |
| AT5G53410 | 0          | 1           | 1             |
| AT5G53500 | 0          | 1           | 1             |
| AT5G53510 | 0          | 1           | 1             |
| AT5G53580 | 1          | 0           | 1             |
| AT5G53750 | 0          | 1           | 1             |
| AT5G53760 | 1          | 1           | 1             |
| AT5G53830 | 1          | 0           | 1             |
| AT5G53880 | 0          | 1           | 1             |
| AT5G53890 | 0          | 1           | 1             |
| AT5G53920 | 1          | 0           | 1             |
| AT5G54020 | 1          | 0           | 1             |
| AT5G54030 | 1          | 0           | 1             |
| AT5G54300 | 1          | 1           | 1             |
| AT5G54310 | 0          | 1           | 1             |
| AT5G54480 | 0          | 1           | 1             |
| AT5G54490 | 0          | 1           | 1             |
| AT5G54500 | 0          | 1           | 1             |
| AT5G54510 | 1          | 1           | 1             |
| AT5G54520 | 0          | 1           | 1             |

Appendix Table S3

| Name      | BES_target | BZR1_target | BESBZR_target |
|-----------|------------|-------------|---------------|
| AT5G54530 | 1          | 1           | 1             |
| AT5G54580 | 0          | 1           | 1             |
| AT5G54585 | 1          | 1           | 1             |
| AT5G54700 | 0          | 1           | 1             |
| AT5G54710 | 0          | 1           | 1             |
| AT5G54750 | 0          | 1           | 1             |
| AT5G54760 | 0          | 1           | 1             |
| AT5G54770 | 0          | 1           | 1             |
| AT5G54840 | 1          | 0           | 1             |
| AT5G54850 | 1          | 0           | 1             |
| AT5G54940 | 0          | 1           | 1             |
| AT5G54950 | 0          | 1           | 1             |
| AT5G54960 | 0          | 1           | 1             |
| AT5G54970 | 0          | 1           | 1             |
| AT5G55020 | 1          | 1           | 1             |
| AT5G55030 | 0          | 1           | 1             |
| AT5G55040 | 0          | 1           | 1             |
| AT5G55050 | 0          | 1           | 1             |
| AT5G55120 | 1          | 0           | 1             |
| AT5G55170 | 0          | 1           | 1             |
| AT5G55180 | 1          | 1           | 1             |
| AT5G55190 | 0          | 1           | 1             |
| AT5G55540 | 1          | 0           | 1             |
| AT5G55780 | 1          | 0           | 1             |
| AT5G55800 | 1          | 0           | 1             |
| AT5G55860 | 1          | 0           | 1             |
| AT5G55910 | 0          | 1           | 1             |
| AT5G55920 | 1          | 1           | 1             |
| AT5G55930 | 0          | 1           | 1             |
| AT5G55950 | 0          | 1           | 1             |
| AT5G55960 | 0          | 1           | 1             |
| AT5G55970 | 0          | 1           | 1             |
| AT5G56030 | 0          | 1           | 1             |
| AT5G56040 | 0          | 1           | 1             |
| AT5G56160 | 1          | 0           | 1             |
| AT5G56210 | 0          | 1           | 1             |
| AT5G56220 | 0          | 1           | 1             |
| AT5G56230 | 0          | 1           | 1             |
| AT5G56240 | 0          | 1           | 1             |
| AT5G56250 | 0          | 1           | 1             |
| AT5G56290 | 0          | 1           | 1             |
| AT5G56300 | 0          | 1           | 1             |
| AT5G56470 | 1          | 0           | 1             |
| AT5G56550 | 0          | 1           | 1             |
| AT5G56560 | 0          | 1           | 1             |
| AT5G56860 | 0          | 1           | 1             |
| AT5G56870 | 0          | 1           | 1             |
| AT5G56975 | 0          | 1           | 1             |
| AT5G56980 | 0          | 1           | 1             |
| AT5G56990 | 0          | 1           | 1             |
| AT5G57000 | 0          | 1           | 1             |

Appendix Table S3

| <b>Name</b> | <b>BES_target</b> | <b>BZR1_target</b> | <b>BESBZR_target</b> |
|-------------|-------------------|--------------------|----------------------|
| AT5G57010   | 0                 | 1                  | 1                    |
| AT5G57050   | 1                 | 0                  | 1                    |
| AT5G57060   | 0                 | 1                  | 1                    |
| AT5G57070   | 1                 | 1                  | 1                    |
| AT5G57330   | 0                 | 1                  | 1                    |
| AT5G57340   | 0                 | 1                  | 1                    |
| AT5G57550   | 0                 | 1                  | 1                    |
| AT5G57560   | 0                 | 1                  | 1                    |
| AT5G57660   | 0                 | 1                  | 1                    |
| AT5G57670   | 0                 | 1                  | 1                    |
| AT5G57700   | 0                 | 1                  | 1                    |
| AT5G57710   | 0                 | 1                  | 1                    |
| AT5G57785   | 1                 | 1                  | 1                    |
| AT5G57790   | 0                 | 1                  | 1                    |
| AT5G57810   | 1                 | 0                  | 1                    |
| AT5G58070   | 1                 | 1                  | 1                    |
| AT5G58080   | 0                 | 1                  | 1                    |
| AT5G58330   | 0                 | 1                  | 1                    |
| AT5G58340   | 0                 | 1                  | 1                    |
| AT5G58350   | 1                 | 1                  | 1                    |
| AT5G58430   | 0                 | 1                  | 1                    |
| AT5G58440   | 0                 | 1                  | 1                    |
| AT5G58530   | 1                 | 0                  | 1                    |
| AT5G58570   | 0                 | 1                  | 1                    |
| AT5G58575   | 0                 | 1                  | 1                    |
| AT5G58610   | 1                 | 0                  | 1                    |
| AT5G58650   | 1                 | 1                  | 1                    |
| AT5G58660   | 0                 | 1                  | 1                    |
| AT5G58670   | 0                 | 1                  | 1                    |
| AT5G59000   | 1                 | 0                  | 1                    |
| AT5G59020   | 1                 | 0                  | 1                    |
| AT5G59040   | 0                 | 1                  | 1                    |
| AT5G59050   | 0                 | 1                  | 1                    |
| AT5G59160   | 0                 | 1                  | 1                    |
| AT5G59220   | 0                 | 1                  | 1                    |
| AT5G59230   | 0                 | 1                  | 1                    |
| AT5G59400   | 1                 | 0                  | 1                    |
| AT5G59480   | 1                 | 0                  | 1                    |
| AT5G59540   | 0                 | 1                  | 1                    |
| AT5G59550   | 0                 | 1                  | 1                    |
| AT5G59560   | 0                 | 1                  | 1                    |
| AT5G59570   | 0                 | 1                  | 1                    |
| AT5G59580   | 0                 | 1                  | 1                    |
| AT5G59720   | 0                 | 1                  | 1                    |
| AT5G59730   | 0                 | 1                  | 1                    |
| AT5G59732   | 0                 | 1                  | 1                    |
| AT5G59740   | 0                 | 1                  | 1                    |
| AT5G59780   | 0                 | 1                  | 1                    |
| AT5G59790   | 0                 | 1                  | 1                    |
| AT5G59820   | 0                 | 1                  | 1                    |
| AT5G59830   | 0                 | 1                  | 1                    |

Appendix Table S3

| Name      | BES_target | BZR1_target | BESBZR_target |
|-----------|------------|-------------|---------------|
| AT5G59900 | 1          | 0           | 1             |
| AT5G59910 | 1          | 1           | 1             |
| AT5G59920 | 0          | 1           | 1             |
| AT5G60150 | 1          | 0           | 1             |
| AT5G60170 | 1          | 0           | 1             |
| AT5G60190 | 0          | 1           | 1             |
| AT5G60200 | 1          | 1           | 1             |
| AT5G60260 | 0          | 1           | 1             |
| AT5G60270 | 0          | 1           | 1             |
| AT5G60280 | 0          | 1           | 1             |
| AT5G60400 | 0          | 1           | 1             |
| AT5G60408 | 0          | 1           | 1             |
| AT5G60670 | 0          | 1           | 1             |
| AT5G60680 | 1          | 1           | 1             |
| AT5G60690 | 1          | 1           | 1             |
| AT5G60710 | 0          | 1           | 1             |
| AT5G60720 | 0          | 1           | 1             |
| AT5G60790 | 0          | 1           | 1             |
| AT5G60800 | 0          | 1           | 1             |
| AT5G60840 | 1          | 1           | 1             |
| AT5G60850 | 0          | 1           | 1             |
| AT5G60860 | 1          | 1           | 1             |
| AT5G60966 | 0          | 1           | 1             |
| AT5G60970 | 0          | 1           | 1             |
| AT5G60978 | 0          | 1           | 1             |
| AT5G61260 | 0          | 1           | 1             |
| AT5G61270 | 0          | 1           | 1             |
| AT5G61280 | 0          | 1           | 1             |
| AT5G61560 | 0          | 1           | 1             |
| AT5G61580 | 0          | 1           | 1             |
| AT5G61590 | 0          | 1           | 1             |
| AT5G61600 | 0          | 1           | 1             |
| AT5G61750 | 1          | 0           | 1             |
| AT5G61820 | 1          | 0           | 1             |
| AT5G61960 | 0          | 1           | 1             |
| AT5G61970 | 0          | 1           | 1             |
| AT5G61990 | 1          | 1           | 1             |
| AT5G62000 | 0          | 1           | 1             |
| AT5G62020 | 0          | 1           | 1             |
| AT5G62030 | 0          | 1           | 1             |
| AT5G62065 | 0          | 1           | 1             |
| AT5G62070 | 0          | 1           | 1             |
| AT5G62080 | 0          | 1           | 1             |
| AT5G62130 | 0          | 1           | 1             |
| AT5G62140 | 0          | 1           | 1             |
| AT5G62220 | 1          | 1           | 1             |
| AT5G62230 | 0          | 1           | 1             |
| AT5G62270 | 0          | 1           | 1             |
| AT5G62280 | 1          | 1           | 1             |
| AT5G62290 | 1          | 0           | 1             |
| AT5G62340 | 0          | 1           | 1             |



Appendix Table S3

| Name      | BES_target | BZR1_target | BESBZR_target |
|-----------|------------|-------------|---------------|
| AT5G62350 | 0          | 1           | 1             |
| AT5G62360 | 0          | 1           | 1             |
| AT5G62390 | 0          | 1           | 1             |
| AT5G62400 | 0          | 1           | 1             |
| AT5G62410 | 0          | 1           | 1             |
| AT5G62420 | 0          | 1           | 1             |
| AT5G62430 | 0          | 1           | 1             |
| AT5G62440 | 0          | 1           | 1             |
| AT5G62470 | 1          | 1           | 1             |
| AT5G62480 | 0          | 1           | 1             |
| AT5G62880 | 0          | 1           | 1             |
| AT5G62890 | 0          | 1           | 1             |
| AT5G62910 | 1          | 0           | 1             |
| AT5G63120 | 0          | 1           | 1             |
| AT5G63130 | 0          | 1           | 1             |
| AT5G63135 | 0          | 1           | 1             |
| AT5G63160 | 0          | 1           | 1             |
| AT5G63170 | 0          | 1           | 1             |
| AT5G63180 | 0          | 1           | 1             |
| AT5G63190 | 0          | 1           | 1             |
| AT5G63340 | 1          | 0           | 1             |
| AT5G63410 | 0          | 1           | 1             |
| AT5G63420 | 0          | 1           | 1             |
| AT5G63770 | 0          | 1           | 1             |
| AT5G63780 | 0          | 1           | 1             |
| AT5G63790 | 1          | 1           | 1             |
| AT5G63800 | 0          | 1           | 1             |
| AT5G63860 | 0          | 1           | 1             |
| AT5G63870 | 0          | 1           | 1             |
| AT5G64110 | 0          | 1           | 1             |
| AT5G64120 | 0          | 1           | 1             |
| AT5G64130 | 0          | 1           | 1             |
| AT5G64250 | 1          | 1           | 1             |
| AT5G64260 | 1          | 1           | 1             |
| AT5G64270 | 0          | 1           | 1             |
| AT5G64340 | 1          | 0           | 1             |
| AT5G64400 | 0          | 1           | 1             |
| AT5G64410 | 0          | 1           | 1             |
| AT5G64420 | 0          | 1           | 1             |
| AT5G64430 | 0          | 1           | 1             |
| AT5G64550 | 0          | 1           | 1             |
| AT5G64560 | 0          | 1           | 1             |
| AT5G64572 | 0          | 1           | 1             |
| AT5G64580 | 0          | 1           | 1             |
| AT5G64660 | 0          | 1           | 1             |
| AT5G64667 | 0          | 1           | 1             |
| AT5G64735 | 0          | 1           | 1             |
| AT5G64740 | 0          | 1           | 1             |
| AT5G64750 | 1          | 1           | 1             |
| AT5G64770 | 0          | 1           | 1             |
| AT5G64780 | 0          | 1           | 1             |

Appendix Table S3

| Name      | BES_target | BZR1_target | BESBZR_target |
|-----------|------------|-------------|---------------|
| AT5G64790 | 0          | 1           | 1             |
| AT5G65100 | 1          | 0           | 1             |
| AT5G65165 | 1          | 1           | 1             |
| AT5G65170 | 0          | 1           | 1             |
| AT5G65260 | 1          | 0           | 1             |
| AT5G65270 | 1          | 0           | 1             |
| AT5G65280 | 1          | 1           | 1             |
| AT5G65290 | 1          | 1           | 1             |
| AT5G65300 | 1          | 1           | 1             |
| AT5G65305 | 1          | 1           | 1             |
| AT5G65310 | 1          | 1           | 1             |
| AT5G65320 | 0          | 1           | 1             |
| AT5G65370 | 0          | 1           | 1             |
| AT5G65380 | 0          | 1           | 1             |
| AT5G65390 | 0          | 1           | 1             |
| AT5G65420 | 1          | 0           | 1             |
| AT5G65430 | 1          | 0           | 1             |
| AT5G65460 | 0          | 1           | 1             |
| AT5G65470 | 0          | 1           | 1             |
| AT5G65630 | 1          | 0           | 1             |
| AT5G65650 | 0          | 1           | 1             |
| AT5G65660 | 0          | 1           | 1             |
| AT5G65676 | 0          | 1           | 1             |
| AT5G65683 | 1          | 1           | 1             |
| AT5G65700 | 1          | 0           | 1             |
| AT5G65920 | 1          | 1           | 1             |
| AT5G65925 | 0          | 1           | 1             |
| AT5G66030 | 1          | 0           | 1             |
| AT5G66130 | 1          | 0           | 1             |
| AT5G66310 | 1          | 0           | 1             |
| AT5G66570 | 0          | 1           | 1             |
| AT5G66580 | 1          | 1           | 1             |
| AT5G66590 | 1          | 1           | 1             |
| AT5G66600 | 0          | 1           | 1             |
| AT5G66610 | 0          | 1           | 1             |
| AT5G66630 | 0          | 1           | 1             |
| AT5G66640 | 1          | 1           | 1             |
| AT5G66670 | 0          | 1           | 1             |
| AT5G66675 | 1          | 1           | 1             |
| AT5G66680 | 1          | 1           | 1             |
| AT5G66720 | 0          | 1           | 1             |
| AT5G66730 | 0          | 1           | 1             |
| AT5G66740 | 0          | 1           | 1             |
| AT5G66760 | 0          | 1           | 1             |
| AT5G66770 | 0          | 1           | 1             |
| AT5G66820 | 1          | 0           | 1             |
| AT5G66900 | 1          | 0           | 1             |
| AT5G66910 | 1          | 0           | 1             |
| AT5G66970 | 0          | 1           | 1             |
| AT5G66980 | 0          | 1           | 1             |
| AT5G66985 | 0          | 1           | 1             |

Appendix Table S3

| <b>Name</b> | <b>BES_target</b> | <b>BZR1_target</b> | <b>BESBZR_target</b> |
|-------------|-------------------|--------------------|----------------------|
| AT5G67020   | 1                 | 0                  | 1                    |
| AT5G67070   | 0                 | 1                  | 1                    |
| AT5G67080   | 0                 | 1                  | 1                    |
| AT5G67180   | 0                 | 1                  | 1                    |
| AT5G67190   | 0                 | 1                  | 1                    |
| AT5G67220   | 1                 | 0                  | 1                    |
| AT5G67230   | 1                 | 0                  | 1                    |
| AT5G67280   | 1                 | 0                  | 1                    |
| AT5G67290   | 1                 | 1                  | 1                    |
| AT5G67300   | 0                 | 1                  | 1                    |
| AT5G67360   | 1                 | 0                  | 1                    |
| AT5G67410   | 1                 | 1                  | 1                    |
| AT5G67411   | 1                 | 1                  | 1                    |
| AT5G67420   | 0                 | 1                  | 1                    |
| AT5G67440   | 0                 | 1                  | 1                    |
| AT5G67450   | 0                 | 1                  | 1                    |
| AT5G67460   | 0                 | 1                  | 1                    |
| AT5G67620   | 1                 | 0                  | 1                    |
| AT5G67630   | 1                 | 0                  | 1                    |

Appendix Table S4

**Appendix Table S4.** PIF target genes, compiled from ChIP-ChIP and ChIP-seq experiments.

| Name      | PIF3_target | PIF4_target | PIF5_target | PIF_target |
|-----------|-------------|-------------|-------------|------------|
| AT1G01060 | 0           | 1           | 0           | 1          |
| AT1G01070 | 0           | 1           | 0           | 1          |
| AT1G01100 | 1           | 1           | 1           | 1          |
| AT1G01110 | 1           | 1           | 1           | 1          |
| AT1G01140 | 0           | 1           | 0           | 1          |
| AT1G01150 | 0           | 1           | 0           | 1          |
| AT1G01250 | 1           | 1           | 1           | 1          |
| AT1G01260 | 1           | 1           | 1           | 1          |
| AT1G01320 | 0           | 1           | 0           | 1          |
| AT1G01340 | 0           | 1           | 0           | 1          |
| AT1G01370 | 0           | 1           | 0           | 1          |
| AT1G01380 | 0           | 1           | 0           | 1          |
| AT1G01390 | 0           | 1           | 0           | 1          |
| AT1G01400 | 0           | 1           | 0           | 1          |
| AT1G01430 | 0           | 1           | 0           | 1          |
| AT1G01440 | 0           | 1           | 0           | 1          |
| AT1G01471 | 0           | 1           | 0           | 1          |
| AT1G01490 | 0           | 1           | 0           | 1          |
| AT1G01500 | 0           | 1           | 0           | 1          |
| AT1G01540 | 0           | 1           | 1           | 1          |
| AT1G01570 | 0           | 1           | 0           | 1          |
| AT1G01580 | 0           | 1           | 0           | 1          |
| AT1G01620 | 0           | 1           | 1           | 1          |
| AT1G01630 | 0           | 1           | 1           | 1          |
| AT1G01650 | 1           | 1           | 1           | 1          |
| AT1G01660 | 0           | 1           | 1           | 1          |
| AT1G01710 | 0           | 1           | 0           | 1          |
| AT1G01720 | 1           | 1           | 0           | 1          |
| AT1G01830 | 1           | 1           | 0           | 1          |
| AT1G01840 | 1           | 1           | 0           | 1          |
| AT1G01940 | 0           | 1           | 0           | 1          |
| AT1G01950 | 0           | 1           | 0           | 1          |
| AT1G02060 | 0           | 1           | 0           | 1          |
| AT1G02065 | 0           | 1           | 0           | 1          |
| AT1G02205 | 0           | 1           | 0           | 1          |
| AT1G02210 | 0           | 1           | 0           | 1          |
| AT1G02230 | 1           | 1           | 1           | 1          |
| AT1G02250 | 0           | 1           | 0           | 1          |
| AT1G02340 | 1           | 1           | 1           | 1          |
| AT1G02350 | 1           | 1           | 1           | 1          |
| AT1G02360 | 0           | 1           | 1           | 1          |
| AT1G02391 | 1           | 1           | 1           | 1          |
| AT1G02400 | 1           | 1           | 1           | 1          |
| AT1G02620 | 0           | 1           | 0           | 1          |
| AT1G02630 | 0           | 1           | 0           | 1          |
| AT1G02640 | 0           | 1           | 0           | 1          |
| AT1G02660 | 1           | 1           | 1           | 1          |
| AT1G02670 | 1           | 1           | 1           | 1          |
| AT1G02800 | 0           | 1           | 0           | 1          |

Appendix Table S4

| Name      | PIF3_target | PIF4_target | PIF5_target | PIF_target |
|-----------|-------------|-------------|-------------|------------|
| AT1G02810 | 0           | 1           | 0           | 1          |
| AT1G02813 | 0           | 1           | 0           | 1          |
| AT1G02816 | 0           | 1           | 0           | 1          |
| AT1G02990 | 1           | 0           | 0           | 1          |
| AT1G03080 | 0           | 1           | 0           | 1          |
| AT1G03090 | 0           | 1           | 0           | 1          |
| AT1G03130 | 0           | 1           | 0           | 1          |
| AT1G03140 | 0           | 1           | 0           | 1          |
| AT1G03170 | 0           | 1           | 0           | 1          |
| AT1G03180 | 1           | 1           | 0           | 1          |
| AT1G03220 | 0           | 0           | 1           | 1          |
| AT1G03457 | 0           | 1           | 0           | 1          |
| AT1G03470 | 1           | 1           | 0           | 1          |
| AT1G03475 | 0           | 1           | 0           | 1          |
| AT1G03590 | 0           | 1           | 1           | 1          |
| AT1G03600 | 0           | 1           | 1           | 1          |
| AT1G03610 | 0           | 1           | 1           | 1          |
| AT1G03780 | 0           | 1           | 0           | 1          |
| AT1G03790 | 0           | 1           | 1           | 1          |
| AT1G03800 | 0           | 1           | 1           | 1          |
| AT1G03810 | 0           | 0           | 1           | 1          |
| AT1G03870 | 0           | 1           | 1           | 1          |
| AT1G03880 | 0           | 1           | 1           | 1          |
| AT1G03982 | 0           | 1           | 1           | 1          |
| AT1G03990 | 0           | 1           | 1           | 1          |
| AT1G04150 | 0           | 1           | 0           | 1          |
| AT1G04160 | 0           | 1           | 0           | 1          |
| AT1G04171 | 1           | 0           | 0           | 1          |
| AT1G04180 | 1           | 0           | 0           | 1          |
| AT1G04240 | 0           | 1           | 1           | 1          |
| AT1G04250 | 0           | 1           | 0           | 1          |
| AT1G04360 | 1           | 0           | 0           | 1          |
| AT1G04370 | 1           | 0           | 0           | 1          |
| AT1G04530 | 0           | 1           | 0           | 1          |
| AT1G04540 | 0           | 1           | 0           | 1          |
| AT1G04550 | 0           | 1           | 0           | 1          |
| AT1G04600 | 0           | 1           | 0           | 1          |
| AT1G04610 | 0           | 1           | 0           | 1          |
| AT1G04684 | 0           | 1           | 1           | 1          |
| AT1G04690 | 0           | 1           | 1           | 1          |
| AT1G05010 | 0           | 1           | 1           | 1          |
| AT1G05020 | 0           | 1           | 0           | 1          |
| AT1G05085 | 0           | 1           | 0           | 1          |
| AT1G05090 | 0           | 1           | 0           | 1          |
| AT1G05150 | 0           | 1           | 0           | 1          |
| AT1G05160 | 0           | 1           | 0           | 1          |
| AT1G05490 | 0           | 1           | 0           | 1          |
| AT1G05700 | 0           | 1           | 0           | 1          |
| AT1G05710 | 0           | 1           | 0           | 1          |
| AT1G05805 | 0           | 1           | 0           | 1          |
| AT1G05810 | 0           | 1           | 0           | 1          |

Appendix Table S4

| Name      | PIF3_target | PIF4_target | PIF5_target | PIF_target |
|-----------|-------------|-------------|-------------|------------|
| AT1G05830 | 0           | 1           | 0           | 1          |
| AT1G05835 | 0           | 1           | 0           | 1          |
| AT1G05850 | 0           | 1           | 0           | 1          |
| AT1G05860 | 0           | 1           | 0           | 1          |
| AT1G05870 | 0           | 1           | 0           | 1          |
| AT1G05880 | 0           | 1           | 0           | 1          |
| AT1G06040 | 0           | 1           | 0           | 1          |
| AT1G06070 | 0           | 1           | 1           | 1          |
| AT1G06080 | 0           | 1           | 0           | 1          |
| AT1G06360 | 0           | 1           | 0           | 1          |
| AT1G06380 | 0           | 1           | 0           | 1          |
| AT1G06390 | 0           | 1           | 0           | 1          |
| AT1G06400 | 0           | 1           | 0           | 1          |
| AT1G06410 | 0           | 1           | 0           | 1          |
| AT1G06570 | 0           | 1           | 0           | 1          |
| AT1G06580 | 0           | 1           | 0           | 1          |
| AT1G06840 | 1           | 1           | 1           | 1          |
| AT1G06850 | 1           | 1           | 1           | 1          |
| AT1G06910 | 0           | 1           | 0           | 1          |
| AT1G06920 | 0           | 1           | 0           | 1          |
| AT1G06970 | 0           | 1           | 0           | 1          |
| AT1G06980 | 0           | 1           | 0           | 1          |
| AT1G07000 | 0           | 1           | 0           | 1          |
| AT1G07010 | 0           | 1           | 0           | 1          |
| AT1G07080 | 0           | 0           | 1           | 1          |
| AT1G07090 | 1           | 1           | 1           | 1          |
| AT1G07100 | 1           | 1           | 1           | 1          |
| AT1G07135 | 1           | 1           | 1           | 1          |
| AT1G07140 | 0           | 1           | 0           | 1          |
| AT1G07200 | 1           | 1           | 0           | 1          |
| AT1G07210 | 1           | 1           | 0           | 1          |
| AT1G07410 | 0           | 0           | 1           | 1          |
| AT1G07420 | 1           | 0           | 1           | 1          |
| AT1G07430 | 0           | 1           | 0           | 1          |
| AT1G07440 | 0           | 1           | 0           | 1          |
| AT1G07500 | 0           | 1           | 1           | 1          |
| AT1G07510 | 0           | 1           | 1           | 1          |
| AT1G07570 | 0           | 0           | 1           | 1          |
| AT1G07580 | 0           | 1           | 0           | 1          |
| AT1G07590 | 0           | 1           | 0           | 1          |
| AT1G07670 | 1           | 0           | 1           | 1          |
| AT1G07680 | 1           | 0           | 1           | 1          |
| AT1G07885 | 0           | 1           | 0           | 1          |
| AT1G07890 | 0           | 1           | 0           | 1          |
| AT1G07980 | 0           | 1           | 0           | 1          |
| AT1G07985 | 0           | 1           | 0           | 1          |
| AT1G08010 | 0           | 1           | 0           | 1          |
| AT1G08030 | 0           | 1           | 0           | 1          |
| AT1G08115 | 0           | 1           | 0           | 1          |
| AT1G08120 | 0           | 1           | 0           | 1          |
| AT1G08190 | 0           | 1           | 0           | 1          |

Appendix Table S4

| Name      | PIF3_target | PIF4_target | PIF5_target | PIF_target |
|-----------|-------------|-------------|-------------|------------|
| AT1G08200 | 0           | 1           | 0           | 1          |
| AT1G08210 | 0           | 1           | 0           | 1          |
| AT1G08250 | 0           | 1           | 0           | 1          |
| AT1G08260 | 0           | 1           | 0           | 1          |
| AT1G08490 | 0           | 1           | 0           | 1          |
| AT1G08500 | 0           | 1           | 0           | 1          |
| AT1G08510 | 0           | 1           | 0           | 1          |
| AT1G08560 | 1           | 1           | 1           | 1          |
| AT1G08570 | 1           | 1           | 1           | 1          |
| AT1G08580 | 0           | 1           | 0           | 1          |
| AT1G08590 | 0           | 1           | 0           | 1          |
| AT1G08650 | 0           | 1           | 0           | 1          |
| AT1G08660 | 0           | 1           | 0           | 1          |
| AT1G08880 | 1           | 0           | 0           | 1          |
| AT1G08890 | 1           | 0           | 0           | 1          |
| AT1G08910 | 0           | 1           | 0           | 1          |
| AT1G08920 | 0           | 1           | 0           | 1          |
| AT1G09060 | 0           | 1           | 1           | 1          |
| AT1G09070 | 0           | 1           | 1           | 1          |
| AT1G09250 | 0           | 1           | 0           | 1          |
| AT1G09260 | 1           | 1           | 1           | 1          |
| AT1G09340 | 0           | 1           | 0           | 1          |
| AT1G09350 | 1           | 1           | 0           | 1          |
| AT1G09390 | 0           | 1           | 0           | 1          |
| AT1G09420 | 0           | 1           | 0           | 1          |
| AT1G09520 | 0           | 1           | 1           | 1          |
| AT1G09530 | 0           | 1           | 0           | 1          |
| AT1G09570 | 0           | 1           | 0           | 1          |
| AT1G09575 | 0           | 1           | 0           | 1          |
| AT1G10020 | 0           | 1           | 0           | 1          |
| AT1G10030 | 0           | 1           | 0           | 1          |
| AT1G10060 | 0           | 1           | 0           | 1          |
| AT1G10070 | 0           | 1           | 0           | 1          |
| AT1G10090 | 0           | 1           | 0           | 1          |
| AT1G10095 | 0           | 1           | 0           | 1          |
| AT1G10120 | 0           | 1           | 0           | 1          |
| AT1G10140 | 0           | 1           | 0           | 1          |
| AT1G10150 | 0           | 1           | 0           | 1          |
| AT1G10410 | 0           | 1           | 0           | 1          |
| AT1G10417 | 0           | 1           | 0           | 1          |
| AT1G10550 | 1           | 1           | 0           | 1          |
| AT1G10560 | 1           | 1           | 1           | 1          |
| AT1G10682 | 1           | 0           | 0           | 1          |
| AT1G10750 | 0           | 1           | 0           | 1          |
| AT1G10840 | 0           | 1           | 0           | 1          |
| AT1G10850 | 0           | 1           | 0           | 1          |
| AT1G10950 | 0           | 1           | 0           | 1          |
| AT1G10960 | 0           | 1           | 0           | 1          |
| AT1G11112 | 0           | 0           | 1           | 1          |
| AT1G11120 | 0           | 1           | 1           | 1          |
| AT1G11210 | 1           | 0           | 1           | 1          |

Appendix Table S4

| Name      | PIF3_target | PIF4_target | PIF5_target | PIF_target |
|-----------|-------------|-------------|-------------|------------|
| AT1G11430 | 0           | 1           | 0           | 1          |
| AT1G11440 | 0           | 1           | 0           | 1          |
| AT1G11545 | 0           | 1           | 0           | 1          |
| AT1G11550 | 0           | 1           | 0           | 1          |
| AT1G11700 | 0           | 1           | 0           | 1          |
| AT1G11710 | 0           | 1           | 0           | 1          |
| AT1G11740 | 0           | 1           | 0           | 1          |
| AT1G11820 | 0           | 1           | 0           | 1          |
| AT1G11840 | 0           | 1           | 0           | 1          |
| AT1G11960 | 1           | 0           | 1           | 1          |
| AT1G11970 | 0           | 1           | 1           | 1          |
| AT1G11980 | 1           | 0           | 0           | 1          |
| AT1G12070 | 1           | 1           | 1           | 1          |
| AT1G12080 | 1           | 1           | 1           | 1          |
| AT1G12090 | 0           | 1           | 0           | 1          |
| AT1G12100 | 0           | 1           | 0           | 1          |
| AT1G12110 | 1           | 1           | 1           | 1          |
| AT1G12180 | 0           | 1           | 0           | 1          |
| AT1G12190 | 0           | 1           | 0           | 1          |
| AT1G12230 | 0           | 1           | 0           | 1          |
| AT1G12240 | 0           | 1           | 0           | 1          |
| AT1G12320 | 0           | 1           | 0           | 1          |
| AT1G12330 | 0           | 1           | 0           | 1          |
| AT1G12420 | 0           | 1           | 0           | 1          |
| AT1G12423 | 0           | 1           | 0           | 1          |
| AT1G12440 | 0           | 1           | 0           | 1          |
| AT1G12450 | 0           | 1           | 0           | 1          |
| AT1G12451 | 0           | 1           | 0           | 1          |
| AT1G12460 | 0           | 1           | 0           | 1          |
| AT1G12500 | 0           | 1           | 0           | 1          |
| AT1G12510 | 0           | 1           | 0           | 1          |
| AT1G12570 | 0           | 1           | 0           | 1          |
| AT1G12580 | 0           | 1           | 0           | 1          |
| AT1G12820 | 0           | 1           | 0           | 1          |
| AT1G12830 | 0           | 1           | 0           | 1          |
| AT1G12845 | 0           | 1           | 0           | 1          |
| AT1G12920 | 0           | 1           | 0           | 1          |
| AT1G12930 | 0           | 1           | 0           | 1          |
| AT1G12980 | 0           | 1           | 0           | 1          |
| AT1G12990 | 0           | 1           | 0           | 1          |
| AT1G13240 | 1           | 1           | 1           | 1          |
| AT1G13245 | 1           | 1           | 1           | 1          |
| AT1G13250 | 0           | 1           | 0           | 1          |
| AT1G13260 | 1           | 1           | 0           | 1          |
| AT1G13270 | 0           | 1           | 0           | 1          |
| AT1G13280 | 0           | 1           | 0           | 1          |
| AT1G13740 | 1           | 0           | 1           | 1          |
| AT1G13940 | 0           | 1           | 0           | 1          |
| AT1G13950 | 0           | 1           | 1           | 1          |
| AT1G14180 | 0           | 1           | 0           | 1          |
| AT1G14185 | 0           | 1           | 0           | 1          |



Appendix Table S4

| Name      | PIF3_target | PIF4_target | PIF5_target | PIF_target |
|-----------|-------------|-------------|-------------|------------|
| AT1G14270 | 0           | 1           | 0           | 1          |
| AT1G14280 | 0           | 1           | 1           | 1          |
| AT1G14290 | 0           | 1           | 1           | 1          |
| AT1G14345 | 0           | 1           | 0           | 1          |
| AT1G14350 | 0           | 1           | 0           | 1          |
| AT1G14360 | 0           | 1           | 0           | 1          |
| AT1G14370 | 0           | 1           | 0           | 1          |
| AT1G14540 | 0           | 1           | 0           | 1          |
| AT1G14549 | 0           | 1           | 0           | 1          |
| AT1G14580 | 0           | 0           | 1           | 1          |
| AT1G14600 | 0           | 1           | 0           | 1          |
| AT1G14610 | 0           | 1           | 0           | 1          |
| AT1G14690 | 0           | 1           | 0           | 1          |
| AT1G14700 | 0           | 1           | 0           | 1          |
| AT1G14710 | 0           | 1           | 0           | 1          |
| AT1G14720 | 0           | 1           | 0           | 1          |
| AT1G14730 | 0           | 1           | 0           | 1          |
| AT1G14750 | 0           | 1           | 0           | 1          |
| AT1G14755 | 0           | 1           | 0           | 1          |
| AT1G14840 | 0           | 1           | 0           | 1          |
| AT1G14850 | 0           | 1           | 0           | 1          |
| AT1G14860 | 0           | 1           | 0           | 1          |
| AT1G14870 | 0           | 1           | 1           | 1          |
| AT1G14880 | 0           | 1           | 0           | 1          |
| AT1G14890 | 0           | 1           | 0           | 1          |
| AT1G14900 | 0           | 1           | 0           | 1          |
| AT1G14910 | 1           | 1           | 1           | 1          |
| AT1G14920 | 1           | 1           | 1           | 1          |
| AT1G15000 | 0           | 1           | 0           | 1          |
| AT1G15010 | 0           | 1           | 0           | 1          |
| AT1G15100 | 0           | 1           | 0           | 1          |
| AT1G15110 | 0           | 1           | 1           | 1          |
| AT1G15120 | 0           | 1           | 1           | 1          |
| AT1G15175 | 0           | 1           | 0           | 1          |
| AT1G15180 | 0           | 1           | 0           | 1          |
| AT1G15210 | 0           | 1           | 0           | 1          |
| AT1G15215 | 0           | 1           | 0           | 1          |
| AT1G15320 | 0           | 1           | 0           | 1          |
| AT1G15330 | 0           | 1           | 0           | 1          |
| AT1G15340 | 0           | 1           | 0           | 1          |
| AT1G15350 | 0           | 1           | 0           | 1          |
| AT1G15410 | 0           | 1           | 0           | 1          |
| AT1G15550 | 1           | 1           | 0           | 1          |
| AT1G15570 | 0           | 1           | 0           | 1          |
| AT1G15660 | 0           | 1           | 0           | 1          |
| AT1G15670 | 1           | 1           | 1           | 1          |
| AT1G15680 | 0           | 1           | 0           | 1          |
| AT1G15690 | 0           | 1           | 0           | 1          |
| AT1G15750 | 1           | 1           | 0           | 1          |
| AT1G15757 | 0           | 1           | 0           | 1          |
| AT1G15760 | 0           | 1           | 0           | 1          |

Appendix Table S4

| Name      | PIF3_target | PIF4_target | PIF5_target | PIF_target |
|-----------|-------------|-------------|-------------|------------|
| AT1G15790 | 0           | 0           | 1           | 1          |
| AT1G15800 | 0           | 1           | 1           | 1          |
| AT1G15880 | 0           | 1           | 0           | 1          |
| AT1G16160 | 1           | 0           | 0           | 1          |
| AT1G16170 | 0           | 1           | 0           | 1          |
| AT1G16180 | 0           | 1           | 0           | 1          |
| AT1G16290 | 0           | 1           | 0           | 1          |
| AT1G16300 | 0           | 1           | 0           | 1          |
| AT1G16490 | 0           | 1           | 0           | 1          |
| AT1G16850 | 1           | 1           | 1           | 1          |
| AT1G16858 | 1           | 1           | 1           | 1          |
| AT1G16860 | 1           | 0           | 1           | 1          |
| AT1G16870 | 0           | 1           | 0           | 1          |
| AT1G16880 | 0           | 1           | 0           | 1          |
| AT1G17110 | 0           | 1           | 0           | 1          |
| AT1G17120 | 0           | 1           | 0           | 1          |
| AT1G17220 | 0           | 1           | 0           | 1          |
| AT1G17230 | 0           | 1           | 0           | 1          |
| AT1G17350 | 0           | 1           | 0           | 1          |
| AT1G17360 | 0           | 1           | 1           | 1          |
| AT1G17380 | 0           | 1           | 0           | 1          |
| AT1G17400 | 0           | 1           | 0           | 1          |
| AT1G17450 | 0           | 1           | 0           | 1          |
| AT1G17455 | 0           | 1           | 0           | 1          |
| AT1G17490 | 0           | 1           | 0           | 1          |
| AT1G17495 | 0           | 0           | 1           | 1          |
| AT1G17500 | 0           | 1           | 0           | 1          |
| AT1G17615 | 0           | 1           | 0           | 1          |
| AT1G17620 | 0           | 1           | 0           | 1          |
| AT1G17830 | 0           | 1           | 0           | 1          |
| AT1G17840 | 0           | 1           | 0           | 1          |
| AT1G17940 | 0           | 1           | 0           | 1          |
| AT1G17950 | 0           | 1           | 0           | 1          |
| AT1G18070 | 1           | 1           | 1           | 1          |
| AT1G18075 | 1           | 1           | 1           | 1          |
| AT1G18280 | 0           | 1           | 0           | 1          |
| AT1G18290 | 0           | 1           | 0           | 1          |
| AT1G18330 | 0           | 1           | 1           | 1          |
| AT1G18335 | 0           | 1           | 1           | 1          |
| AT1G18390 | 0           | 1           | 0           | 1          |
| AT1G18400 | 1           | 1           | 1           | 1          |
| AT1G18410 | 0           | 1           | 0           | 1          |
| AT1G18450 | 0           | 1           | 0           | 1          |
| AT1G18460 | 0           | 1           | 0           | 1          |
| AT1G18570 | 0           | 1           | 1           | 1          |
| AT1G18580 | 0           | 1           | 0           | 1          |
| AT1G18650 | 0           | 1           | 0           | 1          |
| AT1G18670 | 0           | 1           | 1           | 1          |
| AT1G18680 | 0           | 1           | 0           | 1          |
| AT1G18700 | 0           | 1           | 0           | 1          |
| AT1G18710 | 0           | 1           | 0           | 1          |

Appendix Table S4

| Name      | PIF3_target | PIF4_target | PIF5_target | PIF_target |
|-----------|-------------|-------------|-------------|------------|
| AT1G18720 | 0           | 1           | 0           | 1          |
| AT1G18730 | 0           | 1           | 0           | 1          |
| AT1G18740 | 0           | 1           | 0           | 1          |
| AT1G18870 | 0           | 1           | 0           | 1          |
| AT1G19000 | 0           | 1           | 0           | 1          |
| AT1G19010 | 0           | 1           | 0           | 1          |
| AT1G19110 | 1           | 0           | 0           | 1          |
| AT1G19140 | 0           | 1           | 0           | 1          |
| AT1G19150 | 0           | 1           | 0           | 1          |
| AT1G19170 | 0           | 1           | 0           | 1          |
| AT1G19180 | 1           | 1           | 1           | 1          |
| AT1G19220 | 1           | 1           | 0           | 1          |
| AT1G19230 | 0           | 1           | 0           | 1          |
| AT1G19290 | 0           | 1           | 0           | 1          |
| AT1G19300 | 1           | 1           | 1           | 1          |
| AT1G19310 | 1           | 1           | 1           | 1          |
| AT1G19320 | 1           | 1           | 1           | 1          |
| AT1G19397 | 0           | 1           | 0           | 1          |
| AT1G19450 | 0           | 1           | 0           | 1          |
| AT1G19460 | 0           | 1           | 1           | 1          |
| AT1G19570 | 0           | 1           | 0           | 1          |
| AT1G19580 | 0           | 1           | 0           | 1          |
| AT1G19660 | 0           | 1           | 0           | 1          |
| AT1G19670 | 0           | 1           | 0           | 1          |
| AT1G19790 | 1           | 1           | 0           | 1          |
| AT1G19800 | 1           | 1           | 0           | 1          |
| AT1G19835 | 0           | 1           | 1           | 1          |
| AT1G19840 | 0           | 1           | 0           | 1          |
| AT1G19850 | 0           | 1           | 0           | 1          |
| AT1G19870 | 0           | 1           | 0           | 1          |
| AT1G19880 | 0           | 1           | 0           | 1          |
| AT1G20010 | 0           | 1           | 0           | 1          |
| AT1G20015 | 0           | 1           | 0           | 1          |
| AT1G20030 | 0           | 1           | 0           | 1          |
| AT1G20070 | 0           | 1           | 0           | 1          |
| AT1G20080 | 0           | 1           | 0           | 1          |
| AT1G20190 | 0           | 1           | 0           | 1          |
| AT1G20200 | 0           | 1           | 0           | 1          |
| AT1G20320 | 0           | 1           | 0           | 1          |
| AT1G20330 | 0           | 1           | 1           | 1          |
| AT1G20340 | 0           | 1           | 0           | 1          |
| AT1G20350 | 0           | 0           | 1           | 1          |
| AT1G20440 | 0           | 1           | 0           | 1          |
| AT1G20450 | 1           | 1           | 1           | 1          |
| AT1G20460 | 1           | 1           | 1           | 1          |
| AT1G20490 | 0           | 1           | 0           | 1          |
| AT1G20500 | 0           | 1           | 0           | 1          |
| AT1G20510 | 0           | 1           | 0           | 1          |
| AT1G20515 | 0           | 1           | 0           | 1          |
| AT1G20610 | 0           | 1           | 0           | 1          |
| AT1G20620 | 0           | 1           | 1           | 1          |

Appendix Table S4

| Name      | PIF3_target | PIF4_target | PIF5_target | PIF_target |
|-----------|-------------|-------------|-------------|------------|
| AT1G20770 | 0           | 1           | 0           | 1          |
| AT1G20780 | 0           | 1           | 0           | 1          |
| AT1G20790 | 0           | 1           | 0           | 1          |
| AT1G20870 | 1           | 0           | 0           | 1          |
| AT1G20890 | 1           | 1           | 0           | 1          |
| AT1G20900 | 1           | 1           | 1           | 1          |
| AT1G20970 | 0           | 1           | 0           | 1          |
| AT1G20980 | 0           | 1           | 0           | 1          |
| AT1G21010 | 0           | 1           | 0           | 1          |
| AT1G21040 | 1           | 0           | 1           | 1          |
| AT1G21050 | 1           | 1           | 1           | 1          |
| AT1G21060 | 1           | 1           | 1           | 1          |
| AT1G21130 | 0           | 1           | 0           | 1          |
| AT1G21140 | 0           | 1           | 0           | 1          |
| AT1G21326 | 0           | 0           | 1           | 1          |
| AT1G21400 | 0           | 1           | 0           | 1          |
| AT1G21590 | 1           | 0           | 1           | 1          |
| AT1G21600 | 0           | 1           | 1           | 1          |
| AT1G21730 | 0           | 1           | 0           | 1          |
| AT1G21738 | 0           | 1           | 0           | 1          |
| AT1G21810 | 0           | 1           | 1           | 1          |
| AT1G21830 | 1           | 1           | 1           | 1          |
| AT1G21835 | 1           | 1           | 1           | 1          |
| AT1G21900 | 0           | 1           | 0           | 1          |
| AT1G21910 | 0           | 1           | 0           | 1          |
| AT1G21973 | 1           | 0           | 0           | 1          |
| AT1G21975 | 0           | 1           | 0           | 1          |
| AT1G21980 | 1           | 1           | 0           | 1          |
| AT1G21990 | 0           | 1           | 0           | 1          |
| AT1G22060 | 1           | 1           | 1           | 1          |
| AT1G22065 | 1           | 1           | 0           | 1          |
| AT1G22180 | 1           | 1           | 1           | 1          |
| AT1G22190 | 1           | 1           | 1           | 1          |
| AT1G22320 | 0           | 1           | 1           | 1          |
| AT1G22330 | 0           | 1           | 1           | 1          |
| AT1G22360 | 1           | 1           | 0           | 1          |
| AT1G22370 | 0           | 1           | 0           | 1          |
| AT1G22400 | 0           | 0           | 1           | 1          |
| AT1G22420 | 0           | 0           | 1           | 1          |
| AT1G22430 | 0           | 0           | 1           | 1          |
| AT1G22460 | 0           | 1           | 0           | 1          |
| AT1G22470 | 0           | 1           | 0           | 1          |
| AT1G22520 | 0           | 1           | 0           | 1          |
| AT1G22530 | 0           | 1           | 0           | 1          |
| AT1G22600 | 0           | 1           | 1           | 1          |
| AT1G22610 | 0           | 1           | 0           | 1          |
| AT1G22630 | 0           | 1           | 0           | 1          |
| AT1G22640 | 0           | 1           | 0           | 1          |
| AT1G22650 | 0           | 1           | 1           | 1          |
| AT1G22651 | 0           | 0           | 1           | 1          |
| AT1G22660 | 0           | 0           | 1           | 1          |

Appendix Table S4

| Name      | PIF3_target | PIF4_target | PIF5_target | PIF_target |
|-----------|-------------|-------------|-------------|------------|
| AT1G22730 | 0           | 1           | 0           | 1          |
| AT1G22740 | 0           | 1           | 0           | 1          |
| AT1G22760 | 0           | 1           | 0           | 1          |
| AT1G22767 | 0           | 1           | 0           | 1          |
| AT1G22770 | 1           | 0           | 0           | 1          |
| AT1G22880 | 0           | 1           | 1           | 1          |
| AT1G22882 | 0           | 1           | 1           | 1          |
| AT1G22910 | 0           | 1           | 0           | 1          |
| AT1G23020 | 1           | 1           | 1           | 1          |
| AT1G23030 | 1           | 1           | 1           | 1          |
| AT1G23040 | 0           | 1           | 0           | 1          |
| AT1G23050 | 0           | 1           | 0           | 1          |
| AT1G23060 | 0           | 1           | 0           | 1          |
| AT1G23070 | 0           | 1           | 0           | 1          |
| AT1G23074 | 0           | 1           | 0           | 1          |
| AT1G23080 | 0           | 1           | 1           | 1          |
| AT1G23090 | 1           | 1           | 0           | 1          |
| AT1G23100 | 1           | 1           | 0           | 1          |
| AT1G23380 | 0           | 1           | 0           | 1          |
| AT1G23390 | 0           | 1           | 0           | 1          |
| AT1G23480 | 0           | 1           | 0           | 1          |
| AT1G23490 | 0           | 1           | 0           | 1          |
| AT1G23700 | 0           | 1           | 1           | 1          |
| AT1G23710 | 0           | 1           | 1           | 1          |
| AT1G23860 | 0           | 1           | 0           | 1          |
| AT1G23870 | 0           | 1           | 0           | 1          |
| AT1G23980 | 0           | 1           | 0           | 1          |
| AT1G24000 | 0           | 1           | 0           | 1          |
| AT1G24120 | 0           | 1           | 0           | 1          |
| AT1G24130 | 0           | 1           | 0           | 1          |
| AT1G24170 | 0           | 1           | 1           | 1          |
| AT1G24180 | 0           | 1           | 0           | 1          |
| AT1G24260 | 0           | 1           | 1           | 1          |
| AT1G24265 | 0           | 1           | 1           | 1          |
| AT1G24530 | 0           | 1           | 0           | 1          |
| AT1G24540 | 0           | 1           | 0           | 1          |
| AT1G24590 | 1           | 1           | 0           | 1          |
| AT1G24600 | 1           | 1           | 1           | 1          |
| AT1G24625 | 1           | 1           | 0           | 1          |
| AT1G24640 | 1           | 0           | 0           | 1          |
| AT1G24650 | 0           | 1           | 0           | 1          |
| AT1G25220 | 0           | 1           | 0           | 1          |
| AT1G25230 | 0           | 1           | 0           | 1          |
| AT1G25240 | 0           | 1           | 0           | 1          |
| AT1G25250 | 0           | 1           | 0           | 1          |
| AT1G25270 | 0           | 1           | 0           | 1          |
| AT1G25275 | 0           | 1           | 1           | 1          |
| AT1G25280 | 0           | 0           | 1           | 1          |
| AT1G25425 | 0           | 1           | 0           | 1          |
| AT1G25440 | 1           | 1           | 1           | 1          |
| AT1G25450 | 0           | 1           | 1           | 1          |

Appendix Table S4

| Name      | PIF3_target | PIF4_target | PIF5_target | PIF_target |
|-----------|-------------|-------------|-------------|------------|
| AT1G25500 | 0           | 1           | 0           | 1          |
| AT1G25510 | 0           | 1           | 0           | 1          |
| AT1G25540 | 0           | 1           | 0           | 1          |
| AT1G25550 | 0           | 1           | 0           | 1          |
| AT1G25560 | 0           | 1           | 0           | 1          |
| AT1G25570 | 0           | 1           | 0           | 1          |
| AT1G26150 | 0           | 1           | 1           | 1          |
| AT1G26160 | 0           | 1           | 1           | 1          |
| AT1G26270 | 0           | 1           | 0           | 1          |
| AT1G26300 | 0           | 1           | 0           | 1          |
| AT1G26560 | 0           | 1           | 0           | 1          |
| AT1G26773 | 0           | 1           | 0           | 1          |
| AT1G26780 | 0           | 1           | 0           | 1          |
| AT1G26850 | 0           | 1           | 0           | 1          |
| AT1G26870 | 0           | 1           | 0           | 1          |
| AT1G26910 | 0           | 1           | 0           | 1          |
| AT1G26916 | 1           | 1           | 0           | 1          |
| AT1G26920 | 0           | 1           | 0           | 1          |
| AT1G26940 | 0           | 1           | 0           | 1          |
| AT1G26945 | 0           | 1           | 0           | 1          |
| AT1G27050 | 0           | 1           | 0           | 1          |
| AT1G27180 | 0           | 1           | 1           | 1          |
| AT1G27190 | 0           | 1           | 1           | 1          |
| AT1G27210 | 0           | 1           | 1           | 1          |
| AT1G27213 | 0           | 1           | 0           | 1          |
| AT1G27220 | 0           | 1           | 0           | 1          |
| AT1G27280 | 0           | 1           | 0           | 1          |
| AT1G27290 | 0           | 1           | 0           | 1          |
| AT1G27320 | 0           | 1           | 0           | 1          |
| AT1G27330 | 0           | 1           | 0           | 1          |
| AT1G27650 | 0           | 1           | 0           | 1          |
| AT1G27660 | 0           | 1           | 0           | 1          |
| AT1G27670 | 0           | 1           | 0           | 1          |
| AT1G28110 | 0           | 1           | 0           | 1          |
| AT1G28120 | 0           | 1           | 0           | 1          |
| AT1G28130 | 1           | 1           | 1           | 1          |
| AT1G28260 | 0           | 1           | 0           | 1          |
| AT1G28270 | 0           | 1           | 0           | 1          |
| AT1G28280 | 0           | 1           | 1           | 1          |
| AT1G28310 | 0           | 1           | 0           | 1          |
| AT1G28320 | 0           | 1           | 0           | 1          |
| AT1G28330 | 0           | 1           | 1           | 1          |
| AT1G28335 | 0           | 1           | 1           | 1          |
| AT1G28350 | 0           | 1           | 1           | 1          |
| AT1G28360 | 0           | 1           | 1           | 1          |
| AT1G28440 | 0           | 1           | 0           | 1          |
| AT1G28450 | 0           | 1           | 1           | 1          |
| AT1G28480 | 1           | 1           | 1           | 1          |
| AT1G28490 | 1           | 1           | 1           | 1          |
| AT1G28570 | 0           | 1           | 0           | 1          |
| AT1G28580 | 0           | 1           | 0           | 1          |

Appendix Table S4

| Name      | PIF3_target | PIF4_target | PIF5_target | PIF_target |
|-----------|-------------|-------------|-------------|------------|
| AT1G28590 | 0           | 1           | 0           | 1          |
| AT1G28680 | 0           | 1           | 0           | 1          |
| AT1G28685 | 0           | 1           | 0           | 1          |
| AT1G29050 | 0           | 1           | 0           | 1          |
| AT1G29060 | 0           | 1           | 0           | 1          |
| AT1G29090 | 0           | 1           | 0           | 1          |
| AT1G29100 | 0           | 1           | 0           | 1          |
| AT1G29265 | 0           | 1           | 0           | 1          |
| AT1G29270 | 0           | 1           | 0           | 1          |
| AT1G29280 | 0           | 1           | 0           | 1          |
| AT1G29290 | 1           | 1           | 1           | 1          |
| AT1G29395 | 0           | 1           | 1           | 1          |
| AT1G29400 | 0           | 1           | 1           | 1          |
| AT1G29420 | 0           | 0           | 1           | 1          |
| AT1G29440 | 0           | 1           | 1           | 1          |
| AT1G29450 | 0           | 1           | 1           | 1          |
| AT1G29460 | 0           | 1           | 0           | 1          |
| AT1G29465 | 0           | 1           | 0           | 1          |
| AT1G29490 | 0           | 1           | 0           | 1          |
| AT1G29500 | 1           | 1           | 1           | 1          |
| AT1G29630 | 0           | 1           | 1           | 1          |
| AT1G29640 | 0           | 1           | 0           | 1          |
| AT1G29660 | 0           | 1           | 0           | 1          |
| AT1G29940 | 0           | 1           | 0           | 1          |
| AT1G29950 | 0           | 1           | 0           | 1          |
| AT1G29980 | 0           | 1           | 0           | 1          |
| AT1G30016 | 0           | 1           | 0           | 1          |
| AT1G30100 | 0           | 1           | 0           | 1          |
| AT1G30110 | 0           | 1           | 0           | 1          |
| AT1G30270 | 1           | 0           | 0           | 1          |
| AT1G30320 | 0           | 1           | 0           | 1          |
| AT1G30330 | 0           | 1           | 0           | 1          |
| AT1G30340 | 0           | 0           | 1           | 1          |
| AT1G30350 | 0           | 1           | 0           | 1          |
| AT1G30360 | 0           | 1           | 1           | 1          |
| AT1G30430 | 0           | 1           | 0           | 1          |
| AT1G30440 | 0           | 1           | 1           | 1          |
| AT1G30490 | 0           | 1           | 0           | 1          |
| AT1G30500 | 0           | 1           | 0           | 1          |
| AT1G30560 | 0           | 1           | 0           | 1          |
| AT1G30570 | 0           | 1           | 1           | 1          |
| AT1G30680 | 0           | 1           | 0           | 1          |
| AT1G30690 | 0           | 1           | 0           | 1          |
| AT1G30720 | 0           | 0           | 1           | 1          |
| AT1G30730 | 0           | 0           | 1           | 1          |
| AT1G30820 | 0           | 1           | 0           | 1          |
| AT1G30825 | 0           | 1           | 1           | 1          |
| AT1G31020 | 0           | 1           | 0           | 1          |
| AT1G31040 | 0           | 1           | 0           | 1          |
| AT1G31300 | 0           | 1           | 0           | 1          |
| AT1G31310 | 0           | 1           | 0           | 1          |

Appendix Table S4

| Name      | PIF3_target | PIF4_target | PIF5_target | PIF_target |
|-----------|-------------|-------------|-------------|------------|
| AT1G31358 | 0           | 1           | 0           | 1          |
| AT1G31360 | 0           | 1           | 0           | 1          |
| AT1G31410 | 1           | 1           | 0           | 1          |
| AT1G31420 | 1           | 1           | 0           | 1          |
| AT1G31812 | 0           | 1           | 0           | 1          |
| AT1G31814 | 0           | 1           | 0           | 1          |
| AT1G31835 | 0           | 1           | 0           | 1          |
| AT1G31840 | 0           | 1           | 0           | 1          |
| AT1G31875 | 0           | 1           | 0           | 1          |
| AT1G31880 | 0           | 1           | 0           | 1          |
| AT1G31920 | 0           | 1           | 0           | 1          |
| AT1G31930 | 0           | 1           | 0           | 1          |
| AT1G31940 | 1           | 0           | 0           | 1          |
| AT1G31950 | 1           | 0           | 0           | 1          |
| AT1G32050 | 0           | 1           | 0           | 1          |
| AT1G32060 | 1           | 1           | 0           | 1          |
| AT1G32090 | 0           | 1           | 0           | 1          |
| AT1G32100 | 0           | 1           | 0           | 1          |
| AT1G32160 | 0           | 1           | 0           | 1          |
| AT1G32170 | 0           | 1           | 0           | 1          |
| AT1G32190 | 0           | 1           | 0           | 1          |
| AT1G32200 | 0           | 1           | 1           | 1          |
| AT1G32225 | 0           | 1           | 0           | 1          |
| AT1G32230 | 0           | 1           | 0           | 1          |
| AT1G32240 | 0           | 1           | 0           | 1          |
| AT1G32530 | 0           | 1           | 0           | 1          |
| AT1G32540 | 0           | 1           | 0           | 1          |
| AT1G32640 | 0           | 1           | 0           | 1          |
| AT1G32650 | 0           | 1           | 0           | 1          |
| AT1G32660 | 1           | 0           | 0           | 1          |
| AT1G32690 | 0           | 1           | 0           | 1          |
| AT1G32700 | 0           | 1           | 0           | 1          |
| AT1G32710 | 0           | 1           | 0           | 1          |
| AT1G32740 | 0           | 1           | 0           | 1          |
| AT1G32910 | 0           | 1           | 0           | 1          |
| AT1G32920 | 0           | 1           | 1           | 1          |
| AT1G33060 | 1           | 1           | 1           | 1          |
| AT1G33070 | 1           | 1           | 0           | 1          |
| AT1G33140 | 0           | 1           | 0           | 1          |
| AT1G33170 | 0           | 1           | 0           | 1          |
| AT1G33230 | 0           | 1           | 0           | 1          |
| AT1G33240 | 1           | 1           | 1           | 1          |
| AT1G33250 | 0           | 1           | 0           | 1          |
| AT1G33415 | 0           | 1           | 0           | 1          |
| AT1G33440 | 0           | 1           | 0           | 1          |
| AT1G33450 | 1           | 0           | 0           | 1          |
| AT1G33470 | 0           | 1           | 0           | 1          |
| AT1G33560 | 0           | 1           | 0           | 1          |
| AT1G33590 | 0           | 1           | 0           | 1          |
| AT1G33607 | 0           | 0           | 1           | 1          |
| AT1G33610 | 0           | 0           | 1           | 1          |



Appendix Table S4

| Name      | PIF3_target | PIF4_target | PIF5_target | PIF_target |
|-----------|-------------|-------------|-------------|------------|
| AT1G33760 | 0           | 1           | 0           | 1          |
| AT1G33770 | 0           | 1           | 0           | 1          |
| AT1G34110 | 0           | 1           | 0           | 1          |
| AT1G34120 | 0           | 1           | 0           | 1          |
| AT1G34245 | 0           | 0           | 1           | 1          |
| AT1G34580 | 0           | 1           | 0           | 1          |
| AT1G34620 | 1           | 0           | 0           | 1          |
| AT1G34630 | 1           | 1           | 0           | 1          |
| AT1G35230 | 0           | 1           | 0           | 1          |
| AT1G35240 | 0           | 1           | 0           | 1          |
| AT1G35255 | 0           | 1           | 0           | 1          |
| AT1G35260 | 0           | 1           | 0           | 1          |
| AT1G35350 | 0           | 0           | 1           | 1          |
| AT1G35430 | 0           | 1           | 0           | 1          |
| AT1G35501 | 0           | 1           | 0           | 1          |
| AT1G35510 | 0           | 1           | 1           | 1          |
| AT1G35617 | 0           | 1           | 0           | 1          |
| AT1G35620 | 0           | 1           | 0           | 1          |
| AT1G35820 | 0           | 1           | 0           | 1          |
| AT1G35830 | 0           | 1           | 0           | 1          |
| AT1G35900 | 1           | 0           | 0           | 1          |
| AT1G36150 | 0           | 1           | 0           | 1          |
| AT1G36160 | 0           | 1           | 0           | 1          |
| AT1G36925 | 0           | 1           | 0           | 1          |
| AT1G36940 | 0           | 1           | 0           | 1          |
| AT1G37130 | 0           | 1           | 0           | 1          |
| AT1G37140 | 0           | 1           | 0           | 1          |
| AT1G42190 | 0           | 1           | 0           | 1          |
| AT1G42420 | 0           | 0           | 1           | 1          |
| AT1G42430 | 0           | 1           | 0           | 1          |
| AT1G42540 | 0           | 1           | 0           | 1          |
| AT1G42550 | 0           | 1           | 0           | 1          |
| AT1G44100 | 0           | 1           | 0           | 1          |
| AT1G44170 | 0           | 1           | 0           | 1          |
| AT1G44180 | 0           | 1           | 0           | 1          |
| AT1G44542 | 0           | 1           | 0           | 1          |
| AT1G44575 | 0           | 1           | 0           | 1          |
| AT1G44830 | 0           | 1           | 0           | 1          |
| AT1G44835 | 0           | 1           | 0           | 1          |
| AT1G45110 | 0           | 1           | 0           | 1          |
| AT1G45130 | 1           | 1           | 1           | 1          |
| AT1G45230 | 0           | 1           | 0           | 1          |
| AT1G45249 | 0           | 1           | 0           | 1          |
| AT1G45688 | 0           | 1           | 0           | 1          |
| AT1G46408 | 0           | 1           | 0           | 1          |
| AT1G46480 | 0           | 1           | 0           | 1          |
| AT1G46768 | 0           | 1           | 0           | 1          |
| AT1G46840 | 0           | 1           | 0           | 1          |
| AT1G47128 | 0           | 1           | 0           | 1          |
| AT1G47200 | 0           | 1           | 0           | 1          |
| AT1G47840 | 0           | 1           | 0           | 1          |

Appendix Table S4

| Name      | PIF3_target | PIF4_target | PIF5_target | PIF_target |
|-----------|-------------|-------------|-------------|------------|
| AT1G47860 | 0           | 0           | 1           | 1          |
| AT1G47870 | 0           | 1           | 1           | 1          |
| AT1G47990 | 0           | 1           | 0           | 1          |
| AT1G48000 | 0           | 1           | 0           | 1          |
| AT1G48250 | 0           | 0           | 1           | 1          |
| AT1G48260 | 0           | 1           | 1           | 1          |
| AT1G48325 | 0           | 1           | 0           | 1          |
| AT1G48330 | 0           | 1           | 0           | 1          |
| AT1G48350 | 0           | 1           | 0           | 1          |
| AT1G49130 | 0           | 1           | 0           | 1          |
| AT1G49140 | 0           | 1           | 0           | 1          |
| AT1G49190 | 0           | 1           | 0           | 1          |
| AT1G49200 | 0           | 1           | 0           | 1          |
| AT1G49210 | 0           | 1           | 0           | 1          |
| AT1G49220 | 0           | 1           | 0           | 1          |
| AT1G49230 | 0           | 1           | 0           | 1          |
| AT1G49240 | 0           | 1           | 0           | 1          |
| AT1G49450 | 0           | 1           | 0           | 1          |
| AT1G49500 | 0           | 1           | 1           | 1          |
| AT1G49510 | 0           | 1           | 0           | 1          |
| AT1G49610 | 1           | 0           | 1           | 1          |
| AT1G49730 | 0           | 1           | 1           | 1          |
| AT1G49740 | 0           | 1           | 1           | 1          |
| AT1G49780 | 1           | 1           | 1           | 1          |
| AT1G49790 | 0           | 1           | 0           | 1          |
| AT1G50020 | 0           | 1           | 0           | 1          |
| AT1G50030 | 0           | 1           | 0           | 1          |
| AT1G50450 | 1           | 1           | 0           | 1          |
| AT1G50460 | 1           | 1           | 0           | 1          |
| AT1G50630 | 1           | 1           | 0           | 1          |
| AT1G50640 | 0           | 1           | 0           | 1          |
| AT1G50890 | 0           | 1           | 0           | 1          |
| AT1G51130 | 0           | 1           | 0           | 1          |
| AT1G51140 | 0           | 1           | 0           | 1          |
| AT1G51580 | 0           | 1           | 0           | 1          |
| AT1G51680 | 0           | 1           | 0           | 1          |
| AT1G51690 | 0           | 1           | 0           | 1          |
| AT1G51790 | 1           | 0           | 1           | 1          |
| AT1G51800 | 1           | 0           | 1           | 1          |
| AT1G51805 | 0           | 0           | 1           | 1          |
| AT1G51940 | 0           | 1           | 0           | 1          |
| AT1G51950 | 0           | 1           | 0           | 1          |
| AT1G52180 | 0           | 1           | 0           | 1          |
| AT1G52185 | 0           | 1           | 1           | 1          |
| AT1G52190 | 0           | 1           | 1           | 1          |
| AT1G52343 | 1           | 0           | 0           | 1          |
| AT1G52347 | 1           | 0           | 0           | 1          |
| AT1G52560 | 0           | 1           | 0           | 1          |
| AT1G52565 | 0           | 1           | 1           | 1          |
| AT1G52700 | 1           | 1           | 0           | 1          |
| AT1G52710 | 0           | 1           | 0           | 1          |

Appendix Table S4

| Name      | PIF3_target | PIF4_target | PIF5_target | PIF_target |
|-----------|-------------|-------------|-------------|------------|
| AT1G52750 | 0           | 1           | 0           | 1          |
| AT1G52760 | 0           | 1           | 0           | 1          |
| AT1G52830 | 0           | 0           | 1           | 1          |
| AT1G52840 | 0           | 0           | 1           | 1          |
| AT1G52890 | 0           | 1           | 1           | 1          |
| AT1G52900 | 0           | 1           | 0           | 1          |
| AT1G53080 | 0           | 0           | 1           | 1          |
| AT1G53090 | 0           | 0           | 1           | 1          |
| AT1G53165 | 0           | 1           | 0           | 1          |
| AT1G53170 | 1           | 1           | 0           | 1          |
| AT1G53180 | 1           | 1           | 0           | 1          |
| AT1G53220 | 0           | 1           | 0           | 1          |
| AT1G53230 | 0           | 1           | 0           | 1          |
| AT1G53450 | 0           | 1           | 0           | 1          |
| AT1G53460 | 0           | 1           | 0           | 1          |
| AT1G53510 | 0           | 1           | 1           | 1          |
| AT1G53520 | 0           | 1           | 1           | 1          |
| AT1G53750 | 1           | 1           | 0           | 1          |
| AT1G53760 | 0           | 1           | 0           | 1          |
| AT1G53770 | 0           | 1           | 0           | 1          |
| AT1G53780 | 0           | 1           | 0           | 1          |
| AT1G53830 | 0           | 1           | 1           | 1          |
| AT1G53840 | 0           | 1           | 1           | 1          |
| AT1G53850 | 0           | 1           | 0           | 1          |
| AT1G53860 | 0           | 1           | 0           | 1          |
| AT1G54100 | 0           | 1           | 0           | 1          |
| AT1G54110 | 0           | 1           | 0           | 1          |
| AT1G54115 | 0           | 1           | 0           | 1          |
| AT1G54120 | 0           | 1           | 0           | 1          |
| AT1G54200 | 0           | 1           | 0           | 1          |
| AT1G54210 | 1           | 1           | 1           | 1          |
| AT1G54420 | 0           | 1           | 0           | 1          |
| AT1G55020 | 1           | 0           | 0           | 1          |
| AT1G55210 | 0           | 1           | 0           | 1          |
| AT1G55220 | 0           | 1           | 0           | 1          |
| AT1G55325 | 0           | 1           | 0           | 1          |
| AT1G55330 | 0           | 1           | 0           | 1          |
| AT1G55340 | 0           | 1           | 0           | 1          |
| AT1G55546 | 0           | 1           | 0           | 1          |
| AT1G55550 | 0           | 1           | 0           | 1          |
| AT1G55690 | 0           | 1           | 0           | 1          |
| AT1G55700 | 0           | 1           | 0           | 1          |
| AT1G55880 | 0           | 1           | 0           | 1          |
| AT1G56010 | 1           | 0           | 0           | 1          |
| AT1G56020 | 1           | 0           | 0           | 1          |
| AT1G56165 | 0           | 1           | 0           | 1          |
| AT1G56170 | 0           | 1           | 0           | 1          |
| AT1G56210 | 0           | 1           | 0           | 1          |
| AT1G56220 | 0           | 1           | 0           | 1          |
| AT1G56590 | 1           | 1           | 1           | 1          |
| AT1G56600 | 1           | 1           | 1           | 1          |

Appendix Table S4

| Name      | PIF3_target | PIF4_target | PIF5_target | PIF_target |
|-----------|-------------|-------------|-------------|------------|
| AT1G56630 | 0           | 1           | 0           | 1          |
| AT1G56650 | 0           | 1           | 0           | 1          |
| AT1G56670 | 0           | 0           | 1           | 1          |
| AT1G58030 | 0           | 1           | 0           | 1          |
| AT1G58037 | 0           | 1           | 0           | 1          |
| AT1G58100 | 0           | 1           | 0           | 1          |
| AT1G58110 | 0           | 1           | 0           | 1          |
| AT1G58200 | 0           | 1           | 0           | 1          |
| AT1G58210 | 0           | 1           | 0           | 1          |
| AT1G59740 | 0           | 1           | 0           | 1          |
| AT1G59810 | 0           | 1           | 0           | 1          |
| AT1G59820 | 0           | 1           | 0           | 1          |
| AT1G59900 | 0           | 1           | 0           | 1          |
| AT1G59910 | 0           | 1           | 0           | 1          |
| AT1G59920 | 0           | 1           | 0           | 1          |
| AT1G60010 | 1           | 1           | 0           | 1          |
| AT1G60025 | 0           | 1           | 0           | 1          |
| AT1G60050 | 1           | 1           | 0           | 1          |
| AT1G60060 | 0           | 1           | 0           | 1          |
| AT1G60140 | 0           | 1           | 0           | 1          |
| AT1G60150 | 1           | 0           | 1           | 1          |
| AT1G60160 | 0           | 1           | 0           | 1          |
| AT1G60170 | 0           | 1           | 0           | 1          |
| AT1G60180 | 1           | 0           | 1           | 1          |
| AT1G60190 | 1           | 1           | 1           | 1          |
| AT1G60430 | 0           | 1           | 0           | 1          |
| AT1G60440 | 0           | 1           | 0           | 1          |
| AT1G60450 | 0           | 1           | 0           | 1          |
| AT1G61100 | 0           | 1           | 0           | 1          |
| AT1G61105 | 0           | 1           | 0           | 1          |
| AT1G61260 | 0           | 1           | 0           | 1          |
| AT1G61270 | 0           | 1           | 0           | 1          |
| AT1G61350 | 0           | 1           | 0           | 1          |
| AT1G61353 | 0           | 1           | 0           | 1          |
| AT1G61730 | 0           | 1           | 0           | 1          |
| AT1G61732 | 0           | 1           | 0           | 1          |
| AT1G61740 | 0           | 1           | 1           | 1          |
| AT1G61890 | 0           | 1           | 0           | 1          |
| AT1G61900 | 0           | 1           | 0           | 1          |
| AT1G62301 | 0           | 0           | 1           | 1          |
| AT1G62370 | 0           | 1           | 0           | 1          |
| AT1G62380 | 0           | 1           | 0           | 1          |
| AT1G62420 | 0           | 1           | 1           | 1          |
| AT1G62430 | 1           | 1           | 0           | 1          |
| AT1G62440 | 1           | 0           | 0           | 1          |
| AT1G62450 | 0           | 1           | 0           | 1          |
| AT1G62480 | 1           | 1           | 1           | 1          |
| AT1G62760 | 0           | 1           | 0           | 1          |
| AT1G62770 | 0           | 1           | 0           | 1          |
| AT1G62810 | 0           | 1           | 0           | 1          |
| AT1G62820 | 0           | 1           | 0           | 1          |

Appendix Table S4

| Name      | PIF3_target | PIF4_target | PIF5_target | PIF_target |
|-----------|-------------|-------------|-------------|------------|
| AT1G62870 | 0           | 1           | 0           | 1          |
| AT1G62880 | 0           | 1           | 0           | 1          |
| AT1G62940 | 0           | 1           | 0           | 1          |
| AT1G62950 | 0           | 1           | 0           | 1          |
| AT1G63090 | 1           | 1           | 1           | 1          |
| AT1G63100 | 0           | 1           | 0           | 1          |
| AT1G63420 | 0           | 1           | 0           | 1          |
| AT1G63670 | 0           | 1           | 0           | 1          |
| AT1G63680 | 0           | 1           | 0           | 1          |
| AT1G63830 | 0           | 1           | 0           | 1          |
| AT1G63840 | 0           | 1           | 0           | 1          |
| AT1G64060 | 0           | 1           | 0           | 1          |
| AT1G64080 | 1           | 0           | 1           | 1          |
| AT1G64090 | 1           | 0           | 1           | 1          |
| AT1G64110 | 0           | 1           | 0           | 1          |
| AT1G64120 | 0           | 1           | 0           | 1          |
| AT1G64370 | 0           | 1           | 0           | 1          |
| AT1G64380 | 0           | 1           | 1           | 1          |
| AT1G64385 | 0           | 1           | 0           | 1          |
| AT1G64390 | 0           | 1           | 0           | 1          |
| AT1G64450 | 0           | 1           | 0           | 1          |
| AT1G64620 | 0           | 1           | 0           | 1          |
| AT1G64625 | 0           | 1           | 0           | 1          |
| AT1G64640 | 0           | 1           | 0           | 1          |
| AT1G64650 | 0           | 1           | 1           | 1          |
| AT1G64660 | 0           | 1           | 1           | 1          |
| AT1G64670 | 0           | 1           | 0           | 1          |
| AT1G64680 | 0           | 1           | 0           | 1          |
| AT1G64700 | 0           | 1           | 1           | 1          |
| AT1G64710 | 0           | 1           | 1           | 1          |
| AT1G64850 | 0           | 1           | 0           | 1          |
| AT1G64860 | 0           | 1           | 0           | 1          |
| AT1G64980 | 1           | 1           | 1           | 1          |
| AT1G64990 | 0           | 1           | 0           | 1          |
| AT1G65000 | 0           | 1           | 0           | 1          |
| AT1G65010 | 0           | 1           | 0           | 1          |
| AT1G65590 | 0           | 1           | 1           | 1          |
| AT1G65830 | 1           | 1           | 0           | 1          |
| AT1G65840 | 1           | 1           | 0           | 1          |
| AT1G65920 | 0           | 1           | 0           | 1          |
| AT1G65930 | 0           | 1           | 0           | 1          |
| AT1G66145 | 1           | 1           | 1           | 1          |
| AT1G66150 | 1           | 1           | 1           | 1          |
| AT1G66160 | 0           | 0           | 1           | 1          |
| AT1G66173 | 0           | 1           | 0           | 1          |
| AT1G66180 | 0           | 1           | 0           | 1          |
| AT1G66190 | 0           | 1           | 0           | 1          |
| AT1G66235 | 0           | 1           | 0           | 1          |
| AT1G66240 | 0           | 1           | 0           | 1          |
| AT1G66345 | 0           | 1           | 0           | 1          |
| AT1G66350 | 0           | 1           | 0           | 1          |

Appendix Table S4

| Name      | PIF3_target | PIF4_target | PIF5_target | PIF_target |
|-----------|-------------|-------------|-------------|------------|
| AT1G66390 | 0           | 1           | 0           | 1          |
| AT1G66400 | 0           | 1           | 0           | 1          |
| AT1G66560 | 1           | 0           | 1           | 1          |
| AT1G66940 | 0           | 1           | 1           | 1          |
| AT1G66950 | 0           | 1           | 0           | 1          |
| AT1G67040 | 0           | 1           | 0           | 1          |
| AT1G67050 | 1           | 1           | 1           | 1          |
| AT1G67060 | 0           | 1           | 0           | 1          |
| AT1G67190 | 0           | 1           | 0           | 1          |
| AT1G67195 | 0           | 1           | 0           | 1          |
| AT1G67230 | 0           | 1           | 0           | 1          |
| AT1G67238 | 0           | 1           | 0           | 1          |
| AT1G67260 | 0           | 1           | 0           | 1          |
| AT1G67265 | 1           | 1           | 1           | 1          |
| AT1G67270 | 0           | 1           | 0           | 1          |
| AT1G67360 | 0           | 1           | 0           | 1          |
| AT1G67470 | 0           | 1           | 0           | 1          |
| AT1G67480 | 0           | 1           | 0           | 1          |
| AT1G67510 | 0           | 1           | 0           | 1          |
| AT1G67520 | 0           | 1           | 0           | 1          |
| AT1G67590 | 1           | 1           | 1           | 1          |
| AT1G67600 | 0           | 1           | 0           | 1          |
| AT1G67710 | 0           | 1           | 0           | 1          |
| AT1G67720 | 0           | 1           | 0           | 1          |
| AT1G67730 | 0           | 1           | 0           | 1          |
| AT1G67740 | 0           | 1           | 0           | 1          |
| AT1G67750 | 0           | 1           | 0           | 1          |
| AT1G67790 | 0           | 1           | 0           | 1          |
| AT1G67880 | 0           | 1           | 1           | 1          |
| AT1G67890 | 0           | 1           | 1           | 1          |
| AT1G67900 | 0           | 1           | 1           | 1          |
| AT1G67910 | 0           | 1           | 0           | 1          |
| AT1G67920 | 0           | 1           | 0           | 1          |
| AT1G68010 | 0           | 1           | 0           | 1          |
| AT1G68020 | 1           | 1           | 1           | 1          |
| AT1G68120 | 1           | 1           | 0           | 1          |
| AT1G68130 | 1           | 1           | 0           | 1          |
| AT1G68185 | 0           | 1           | 0           | 1          |
| AT1G68190 | 1           | 1           | 1           | 1          |
| AT1G68330 | 0           | 1           | 0           | 1          |
| AT1G68430 | 0           | 1           | 0           | 1          |
| AT1G68440 | 0           | 1           | 0           | 1          |
| AT1G68490 | 1           | 1           | 0           | 1          |
| AT1G68500 | 0           | 1           | 0           | 1          |
| AT1G68540 | 0           | 1           | 0           | 1          |
| AT1G68550 | 1           | 1           | 0           | 1          |
| AT1G68560 | 1           | 1           | 0           | 1          |
| AT1G68570 | 0           | 1           | 1           | 1          |
| AT1G68610 | 0           | 1           | 0           | 1          |
| AT1G68620 | 1           | 1           | 0           | 1          |
| AT1G68660 | 1           | 1           | 1           | 1          |

Appendix Table S4

| Name      | PIF3_target | PIF4_target | PIF5_target | PIF_target |
|-----------|-------------|-------------|-------------|------------|
| AT1G68670 | 1           | 1           | 1           | 1          |
| AT1G68800 | 0           | 0           | 1           | 1          |
| AT1G68825 | 0           | 1           | 0           | 1          |
| AT1G68830 | 1           | 1           | 1           | 1          |
| AT1G68840 | 1           | 1           | 1           | 1          |
| AT1G68862 | 0           | 0           | 1           | 1          |
| AT1G68875 | 0           | 0           | 1           | 1          |
| AT1G69000 | 0           | 1           | 1           | 1          |
| AT1G69010 | 1           | 1           | 1           | 1          |
| AT1G69030 | 1           | 1           | 1           | 1          |
| AT1G69040 | 0           | 1           | 0           | 1          |
| AT1G69120 | 0           | 1           | 0           | 1          |
| AT1G69130 | 0           | 1           | 0           | 1          |
| AT1G69150 | 0           | 1           | 1           | 1          |
| AT1G69160 | 0           | 1           | 1           | 1          |
| AT1G69252 | 0           | 1           | 0           | 1          |
| AT1G69260 | 1           | 1           | 0           | 1          |
| AT1G69270 | 1           | 1           | 1           | 1          |
| AT1G69280 | 0           | 1           | 0           | 1          |
| AT1G69295 | 1           | 1           | 0           | 1          |
| AT1G69310 | 0           | 1           | 0           | 1          |
| AT1G69410 | 0           | 1           | 0           | 1          |
| AT1G69420 | 0           | 1           | 0           | 1          |
| AT1G69526 | 0           | 1           | 0           | 1          |
| AT1G69530 | 0           | 1           | 0           | 1          |
| AT1G69540 | 0           | 1           | 1           | 1          |
| AT1G69550 | 0           | 1           | 0           | 1          |
| AT1G69560 | 0           | 1           | 0           | 1          |
| AT1G69570 | 1           | 1           | 1           | 1          |
| AT1G69580 | 0           | 1           | 0           | 1          |
| AT1G69587 | 0           | 1           | 0           | 1          |
| AT1G69600 | 0           | 1           | 0           | 1          |
| AT1G69680 | 0           | 1           | 0           | 1          |
| AT1G69690 | 1           | 1           | 1           | 1          |
| AT1G69740 | 0           | 1           | 0           | 1          |
| AT1G69750 | 0           | 1           | 0           | 1          |
| AT1G69760 | 1           | 1           | 0           | 1          |
| AT1G69770 | 0           | 1           | 0           | 1          |
| AT1G69780 | 0           | 1           | 0           | 1          |
| AT1G69790 | 0           | 1           | 0           | 1          |
| AT1G69800 | 0           | 1           | 0           | 1          |
| AT1G69850 | 0           | 1           | 0           | 1          |
| AT1G69890 | 0           | 1           | 1           | 1          |
| AT1G69900 | 0           | 1           | 0           | 1          |
| AT1G69910 | 0           | 1           | 0           | 1          |
| AT1G69920 | 0           | 0           | 1           | 1          |
| AT1G69930 | 0           | 0           | 1           | 1          |
| AT1G70080 | 0           | 1           | 0           | 1          |
| AT1G70090 | 0           | 1           | 0           | 1          |
| AT1G70200 | 0           | 1           | 0           | 1          |
| AT1G70209 | 0           | 1           | 1           | 1          |

Appendix Table S4

| Name      | PIF3_target | PIF4_target | PIF5_target | PIF_target |
|-----------|-------------|-------------|-------------|------------|
| AT1G70210 | 0           | 1           | 1           | 1          |
| AT1G70220 | 0           | 1           | 0           | 1          |
| AT1G70260 | 0           | 1           | 0           | 1          |
| AT1G70270 | 0           | 1           | 0           | 1          |
| AT1G70280 | 0           | 1           | 0           | 1          |
| AT1G70290 | 0           | 1           | 0           | 1          |
| AT1G70300 | 1           | 1           | 0           | 1          |
| AT1G70310 | 0           | 1           | 0           | 1          |
| AT1G70360 | 0           | 1           | 0           | 1          |
| AT1G70370 | 0           | 1           | 0           | 1          |
| AT1G70410 | 0           | 1           | 0           | 1          |
| AT1G70420 | 1           | 1           | 0           | 1          |
| AT1G70430 | 1           | 1           | 0           | 1          |
| AT1G70510 | 0           | 1           | 0           | 1          |
| AT1G70530 | 0           | 1           | 0           | 1          |
| AT1G70540 | 0           | 1           | 0           | 1          |
| AT1G70560 | 0           | 1           | 1           | 1          |
| AT1G70700 | 0           | 1           | 0           | 1          |
| AT1G70710 | 0           | 1           | 0           | 1          |
| AT1G70750 | 1           | 0           | 1           | 1          |
| AT1G70760 | 1           | 0           | 1           | 1          |
| AT1G70780 | 0           | 0           | 1           | 1          |
| AT1G70782 | 0           | 0           | 1           | 1          |
| AT1G70790 | 0           | 0           | 1           | 1          |
| AT1G70920 | 0           | 1           | 0           | 1          |
| AT1G70940 | 1           | 1           | 1           | 1          |
| AT1G70944 | 0           | 1           | 1           | 1          |
| AT1G70949 | 0           | 1           | 0           | 1          |
| AT1G70950 | 0           | 0           | 1           | 1          |
| AT1G71002 | 0           | 1           | 0           | 1          |
| AT1G71010 | 0           | 1           | 0           | 1          |
| AT1G71015 | 0           | 0           | 1           | 1          |
| AT1G71020 | 0           | 0           | 1           | 1          |
| AT1G71080 | 0           | 1           | 0           | 1          |
| AT1G71090 | 0           | 1           | 0           | 1          |
| AT1G71100 | 0           | 1           | 0           | 1          |
| AT1G71110 | 0           | 1           | 0           | 1          |
| AT1G71490 | 0           | 0           | 1           | 1          |
| AT1G71520 | 1           | 0           | 1           | 1          |
| AT1G71695 | 0           | 0           | 1           | 1          |
| AT1G71870 | 0           | 1           | 0           | 1          |
| AT1G71880 | 0           | 1           | 0           | 1          |
| AT1G71960 | 0           | 1           | 0           | 1          |
| AT1G71970 | 0           | 1           | 0           | 1          |
| AT1G72000 | 0           | 1           | 0           | 1          |
| AT1G72010 | 0           | 1           | 0           | 1          |
| AT1G72070 | 0           | 1           | 0           | 1          |
| AT1G72080 | 0           | 1           | 0           | 1          |
| AT1G72100 | 0           | 1           | 0           | 1          |
| AT1G72141 | 0           | 1           | 0           | 1          |
| AT1G72150 | 0           | 1           | 0           | 1          |



Appendix Table S4

| Name      | PIF3_target | PIF4_target | PIF5_target | PIF_target |
|-----------|-------------|-------------|-------------|------------|
| AT1G72160 | 0           | 1           | 0           | 1          |
| AT1G72175 | 0           | 1           | 0           | 1          |
| AT1G72180 | 0           | 1           | 1           | 1          |
| AT1G72200 | 0           | 1           | 0           | 1          |
| AT1G72240 | 0           | 1           | 0           | 1          |
| AT1G72250 | 0           | 1           | 0           | 1          |
| AT1G72280 | 0           | 1           | 0           | 1          |
| AT1G72290 | 0           | 1           | 0           | 1          |
| AT1G72390 | 0           | 1           | 0           | 1          |
| AT1G72430 | 0           | 1           | 0           | 1          |
| AT1G72440 | 0           | 1           | 0           | 1          |
| AT1G72450 | 0           | 1           | 1           | 1          |
| AT1G72460 | 0           | 1           | 1           | 1          |
| AT1G72470 | 1           | 1           | 1           | 1          |
| AT1G72490 | 1           | 1           | 1           | 1          |
| AT1G72500 | 0           | 1           | 0           | 1          |
| AT1G72520 | 0           | 1           | 0           | 1          |
| AT1G72590 | 0           | 1           | 0           | 1          |
| AT1G72600 | 0           | 1           | 1           | 1          |
| AT1G72610 | 0           | 1           | 1           | 1          |
| AT1G72620 | 0           | 1           | 1           | 1          |
| AT1G72690 | 0           | 1           | 0           | 1          |
| AT1G72700 | 0           | 1           | 0           | 1          |
| AT1G72810 | 0           | 1           | 0           | 1          |
| AT1G72820 | 0           | 1           | 0           | 1          |
| AT1G72990 | 1           | 1           | 0           | 1          |
| AT1G73000 | 1           | 1           | 0           | 1          |
| AT1G73050 | 0           | 1           | 0           | 1          |
| AT1G73060 | 0           | 1           | 0           | 1          |
| AT1G73066 | 0           | 1           | 0           | 1          |
| AT1G73080 | 0           | 1           | 0           | 1          |
| AT1G73120 | 1           | 1           | 1           | 1          |
| AT1G73130 | 1           | 1           | 1           | 1          |
| AT1G73370 | 0           | 1           | 0           | 1          |
| AT1G73380 | 0           | 1           | 0           | 1          |
| AT1G73470 | 0           | 1           | 1           | 1          |
| AT1G73480 | 0           | 1           | 1           | 1          |
| AT1G73540 | 0           | 1           | 1           | 1          |
| AT1G73550 | 0           | 1           | 0           | 1          |
| AT1G73590 | 0           | 1           | 0           | 1          |
| AT1G73600 | 0           | 1           | 0           | 1          |
| AT1G73660 | 1           | 1           | 0           | 1          |
| AT1G73670 | 1           | 1           | 0           | 1          |
| AT1G73680 | 0           | 1           | 0           | 1          |
| AT1G73687 | 0           | 1           | 1           | 1          |
| AT1G73690 | 0           | 1           | 1           | 1          |
| AT1G73750 | 0           | 0           | 1           | 1          |
| AT1G73760 | 0           | 0           | 1           | 1          |
| AT1G73830 | 0           | 1           | 1           | 1          |
| AT1G73840 | 0           | 1           | 0           | 1          |
| AT1G73880 | 0           | 1           | 0           | 1          |

Appendix Table S4

| Name      | PIF3_target | PIF4_target | PIF5_target | PIF_target |
|-----------|-------------|-------------|-------------|------------|
| AT1G73960 | 0           | 1           | 0           | 1          |
| AT1G73965 | 0           | 1           | 0           | 1          |
| AT1G74010 | 0           | 0           | 1           | 1          |
| AT1G74020 | 0           | 0           | 1           | 1          |
| AT1G74088 | 1           | 0           | 1           | 1          |
| AT1G74440 | 1           | 0           | 1           | 1          |
| AT1G74448 | 0           | 1           | 1           | 1          |
| AT1G74450 | 1           | 0           | 0           | 1          |
| AT1G74500 | 0           | 1           | 0           | 1          |
| AT1G74510 | 0           | 1           | 0           | 1          |
| AT1G74650 | 0           | 1           | 0           | 1          |
| AT1G74660 | 0           | 1           | 0           | 1          |
| AT1G74670 | 0           | 1           | 1           | 1          |
| AT1G74740 | 1           | 1           | 0           | 1          |
| AT1G74750 | 1           | 1           | 0           | 1          |
| AT1G74770 | 1           | 1           | 0           | 1          |
| AT1G74780 | 1           | 1           | 0           | 1          |
| AT1G74790 | 0           | 1           | 0           | 1          |
| AT1G74840 | 1           | 1           | 0           | 1          |
| AT1G74920 | 0           | 1           | 0           | 1          |
| AT1G74929 | 0           | 1           | 0           | 1          |
| AT1G75060 | 0           | 1           | 0           | 1          |
| AT1G75070 | 0           | 1           | 0           | 1          |
| AT1G75166 | 0           | 1           | 0           | 1          |
| AT1G75170 | 1           | 1           | 0           | 1          |
| AT1G75180 | 0           | 1           | 1           | 1          |
| AT1G75190 | 0           | 1           | 1           | 1          |
| AT1G75200 | 0           | 1           | 1           | 1          |
| AT1G75210 | 0           | 1           | 0           | 1          |
| AT1G75230 | 0           | 1           | 0           | 1          |
| AT1G75240 | 1           | 1           | 1           | 1          |
| AT1G75295 | 0           | 1           | 0           | 1          |
| AT1G75310 | 0           | 1           | 0           | 1          |
| AT1G75380 | 0           | 1           | 0           | 1          |
| AT1G75388 | 1           | 1           | 0           | 1          |
| AT1G75390 | 1           | 0           | 0           | 1          |
| AT1G75430 | 0           | 1           | 0           | 1          |
| AT1G75440 | 0           | 1           | 0           | 1          |
| AT1G75450 | 1           | 1           | 1           | 1          |
| AT1G75460 | 0           | 1           | 1           | 1          |
| AT1G75470 | 0           | 1           | 0           | 1          |
| AT1G75490 | 0           | 1           | 0           | 1          |
| AT1G75500 | 0           | 1           | 1           | 1          |
| AT1G75510 | 0           | 1           | 0           | 1          |
| AT1G75520 | 0           | 1           | 0           | 1          |
| AT1G75530 | 0           | 1           | 0           | 1          |
| AT1G75540 | 1           | 1           | 0           | 1          |
| AT1G75550 | 0           | 1           | 0           | 1          |
| AT1G75580 | 0           | 1           | 0           | 1          |
| AT1G75590 | 1           | 1           | 0           | 1          |
| AT1G75600 | 1           | 1           | 0           | 1          |

Appendix Table S4

| Name      | PIF3_target | PIF4_target | PIF5_target | PIF_target |
|-----------|-------------|-------------|-------------|------------|
| AT1G75710 | 0           | 1           | 0           | 1          |
| AT1G75800 | 0           | 1           | 0           | 1          |
| AT1G75810 | 0           | 1           | 0           | 1          |
| AT1G75820 | 0           | 1           | 1           | 1          |
| AT1G75830 | 0           | 1           | 0           | 1          |
| AT1G76080 | 0           | 0           | 1           | 1          |
| AT1G76090 | 0           | 1           | 0           | 1          |
| AT1G76100 | 0           | 1           | 0           | 1          |
| AT1G76150 | 0           | 0           | 1           | 1          |
| AT1G76160 | 0           | 1           | 1           | 1          |
| AT1G76170 | 0           | 1           | 0           | 1          |
| AT1G76180 | 0           | 1           | 0           | 1          |
| AT1G76185 | 0           | 1           | 0           | 1          |
| AT1G76240 | 0           | 1           | 0           | 1          |
| AT1G76250 | 0           | 1           | 0           | 1          |
| AT1G76360 | 0           | 0           | 1           | 1          |
| AT1G76380 | 0           | 1           | 0           | 1          |
| AT1G76390 | 0           | 1           | 0           | 1          |
| AT1G76420 | 0           | 1           | 0           | 1          |
| AT1G76490 | 0           | 1           | 0           | 1          |
| AT1G76500 | 1           | 1           | 0           | 1          |
| AT1G76600 | 1           | 0           | 1           | 1          |
| AT1G76730 | 0           | 1           | 0           | 1          |
| AT1G76740 | 0           | 1           | 0           | 1          |
| AT1G76880 | 0           | 1           | 1           | 1          |
| AT1G76890 | 1           | 1           | 0           | 1          |
| AT1G76900 | 0           | 1           | 0           | 1          |
| AT1G77000 | 1           | 0           | 0           | 1          |
| AT1G77200 | 1           | 1           | 0           | 1          |
| AT1G77210 | 0           | 1           | 0           | 1          |
| AT1G77280 | 0           | 1           | 0           | 1          |
| AT1G77480 | 0           | 1           | 0           | 1          |
| AT1G77490 | 0           | 1           | 0           | 1          |
| AT1G77500 | 0           | 1           | 0           | 1          |
| AT1G77670 | 0           | 1           | 0           | 1          |
| AT1G77680 | 0           | 1           | 0           | 1          |
| AT1G77690 | 0           | 1           | 0           | 1          |
| AT1G77700 | 0           | 1           | 0           | 1          |
| AT1G77740 | 1           | 0           | 0           | 1          |
| AT1G77855 | 0           | 1           | 0           | 1          |
| AT1G77860 | 0           | 1           | 0           | 1          |
| AT1G77880 | 0           | 1           | 0           | 1          |
| AT1G78030 | 0           | 1           | 0           | 1          |
| AT1G78040 | 0           | 1           | 1           | 1          |
| AT1G78070 | 0           | 1           | 0           | 1          |
| AT1G78080 | 1           | 1           | 0           | 1          |
| AT1G78090 | 0           | 1           | 0           | 1          |
| AT1G78100 | 0           | 1           | 0           | 1          |
| AT1G78220 | 1           | 1           | 0           | 1          |
| AT1G78230 | 1           | 1           | 0           | 1          |
| AT1G78240 | 0           | 1           | 0           | 1          |

Appendix Table S4

| Name      | PIF3_target | PIF4_target | PIF5_target | PIF_target |
|-----------|-------------|-------------|-------------|------------|
| AT1G78250 | 0           | 1           | 0           | 1          |
| AT1G78260 | 0           | 1           | 0           | 1          |
| AT1G78290 | 0           | 1           | 1           | 1          |
| AT1G78300 | 0           | 1           | 1           | 1          |
| AT1G78390 | 0           | 1           | 0           | 1          |
| AT1G78400 | 0           | 1           | 1           | 1          |
| AT1G78410 | 0           | 0           | 1           | 1          |
| AT1G78670 | 0           | 1           | 0           | 1          |
| AT1G78680 | 0           | 1           | 0           | 1          |
| AT1G78690 | 0           | 1           | 1           | 1          |
| AT1G78700 | 1           | 1           | 1           | 1          |
| AT1G78710 | 0           | 1           | 1           | 1          |
| AT1G78850 | 1           | 1           | 1           | 1          |
| AT1G78860 | 0           | 1           | 0           | 1          |
| AT1G78880 | 0           | 1           | 0           | 1          |
| AT1G78890 | 0           | 1           | 0           | 1          |
| AT1G78960 | 0           | 1           | 0           | 1          |
| AT1G78970 | 0           | 1           | 0           | 1          |
| AT1G79060 | 0           | 1           | 0           | 1          |
| AT1G79070 | 0           | 1           | 0           | 1          |
| AT1G79100 | 0           | 1           | 0           | 1          |
| AT1G79110 | 0           | 1           | 0           | 1          |
| AT1G79120 | 0           | 1           | 1           | 1          |
| AT1G79330 | 0           | 1           | 0           | 1          |
| AT1G79340 | 0           | 1           | 0           | 1          |
| AT1G79350 | 0           | 1           | 0           | 1          |
| AT1G79360 | 1           | 1           | 0           | 1          |
| AT1G79370 | 1           | 1           | 0           | 1          |
| AT1G79420 | 0           | 1           | 1           | 1          |
| AT1G79530 | 0           | 1           | 0           | 1          |
| AT1G79540 | 0           | 1           | 0           | 1          |
| AT1G79580 | 1           | 0           | 1           | 1          |
| AT1G79590 | 1           | 0           | 1           | 1          |
| AT1G79630 | 0           | 1           | 0           | 1          |
| AT1G79640 | 0           | 1           | 0           | 1          |
| AT1G79650 | 0           | 1           | 0           | 1          |
| AT1G79660 | 0           | 1           | 0           | 1          |
| AT1G79750 | 0           | 1           | 0           | 1          |
| AT1G79760 | 0           | 1           | 0           | 1          |
| AT1G80130 | 0           | 1           | 0           | 1          |
| AT1G80133 | 0           | 1           | 0           | 1          |
| AT1G80170 | 0           | 1           | 0           | 1          |
| AT1G80180 | 0           | 1           | 0           | 1          |
| AT1G80240 | 0           | 1           | 1           | 1          |
| AT1G80250 | 0           | 1           | 1           | 1          |
| AT1G80280 | 0           | 1           | 1           | 1          |
| AT1G80290 | 0           | 1           | 1           | 1          |
| AT1G80300 | 0           | 1           | 0           | 1          |
| AT1G80390 | 0           | 1           | 0           | 1          |
| AT1G80400 | 0           | 1           | 0           | 1          |
| AT1G80460 | 1           | 0           | 1           | 1          |

Appendix Table S4

| Name      | PIF3_target | PIF4_target | PIF5_target | PIF_target |
|-----------|-------------|-------------|-------------|------------|
| AT1G80490 | 0           | 1           | 0           | 1          |
| AT1G80500 | 0           | 1           | 0           | 1          |
| AT1G80831 | 0           | 1           | 0           | 1          |
| AT1G80840 | 0           | 0           | 1           | 1          |
| AT1G80860 | 0           | 0           | 1           | 1          |
| AT1G80865 | 0           | 1           | 0           | 1          |
| AT1G80870 | 0           | 1           | 1           | 1          |
| AT2G01010 | 0           | 0           | 1           | 1          |
| AT2G01020 | 0           | 0           | 1           | 1          |
| AT2G01022 | 0           | 0           | 1           | 1          |
| AT2G01140 | 1           | 1           | 1           | 1          |
| AT2G01150 | 1           | 1           | 1           | 1          |
| AT2G01180 | 0           | 1           | 0           | 1          |
| AT2G01190 | 0           | 1           | 0           | 1          |
| AT2G01200 | 0           | 1           | 0           | 1          |
| AT2G01300 | 0           | 1           | 0           | 1          |
| AT2G01310 | 0           | 1           | 0           | 1          |
| AT2G01340 | 0           | 0           | 1           | 1          |
| AT2G01410 | 0           | 1           | 0           | 1          |
| AT2G01420 | 1           | 1           | 0           | 1          |
| AT2G01430 | 0           | 1           | 0           | 1          |
| AT2G01440 | 0           | 1           | 0           | 1          |
| AT2G01450 | 0           | 1           | 0           | 1          |
| AT2G01570 | 1           | 1           | 1           | 1          |
| AT2G01580 | 0           | 1           | 0           | 1          |
| AT2G01600 | 0           | 1           | 0           | 1          |
| AT2G01610 | 0           | 1           | 0           | 1          |
| AT2G01620 | 0           | 1           | 0           | 1          |
| AT2G01670 | 0           | 1           | 1           | 1          |
| AT2G01680 | 1           | 1           | 1           | 1          |
| AT2G01890 | 0           | 1           | 0           | 1          |
| AT2G01900 | 0           | 1           | 0           | 1          |
| AT2G01905 | 0           | 1           | 0           | 1          |
| AT2G01910 | 0           | 1           | 0           | 1          |
| AT2G02070 | 0           | 1           | 1           | 1          |
| AT2G02080 | 0           | 1           | 1           | 1          |
| AT2G02090 | 0           | 0           | 1           | 1          |
| AT2G02170 | 0           | 1           | 1           | 1          |
| AT2G02180 | 0           | 1           | 1           | 1          |
| AT2G02440 | 0           | 1           | 0           | 1          |
| AT2G02450 | 0           | 1           | 0           | 1          |
| AT2G02710 | 0           | 1           | 0           | 1          |
| AT2G02720 | 0           | 1           | 0           | 1          |
| AT2G02860 | 0           | 1           | 0           | 1          |
| AT2G02870 | 0           | 1           | 0           | 1          |
| AT2G02960 | 0           | 1           | 0           | 1          |
| AT2G02970 | 0           | 1           | 0           | 1          |
| AT2G03110 | 0           | 1           | 0           | 1          |
| AT2G03120 | 1           | 1           | 1           | 1          |
| AT2G03240 | 0           | 1           | 0           | 1          |
| AT2G03250 | 0           | 1           | 0           | 1          |

Appendix Table S4

| Name      | PIF3_target | PIF4_target | PIF5_target | PIF_target |
|-----------|-------------|-------------|-------------|------------|
| AT2G03530 | 0           | 1           | 0           | 1          |
| AT2G03550 | 0           | 1           | 0           | 1          |
| AT2G03700 | 1           | 1           | 1           | 1          |
| AT2G03710 | 1           | 1           | 0           | 1          |
| AT2G03720 | 0           | 1           | 0           | 1          |
| AT2G03730 | 1           | 1           | 0           | 1          |
| AT2G03740 | 0           | 1           | 0           | 1          |
| AT2G03890 | 0           | 1           | 0           | 1          |
| AT2G03913 | 0           | 1           | 0           | 1          |
| AT2G04240 | 0           | 1           | 0           | 1          |
| AT2G04270 | 0           | 1           | 0           | 1          |
| AT2G04350 | 1           | 0           | 0           | 1          |
| AT2G04495 | 0           | 1           | 0           | 1          |
| AT2G04500 | 0           | 1           | 0           | 1          |
| AT2G04675 | 1           | 0           | 0           | 1          |
| AT2G04680 | 1           | 0           | 0           | 1          |
| AT2G05520 | 0           | 0           | 1           | 1          |
| AT2G05780 | 0           | 0           | 1           | 1          |
| AT2G05786 | 0           | 1           | 1           | 1          |
| AT2G05790 | 0           | 1           | 1           | 1          |
| AT2G05920 | 0           | 1           | 0           | 1          |
| AT2G05940 | 0           | 1           | 1           | 1          |
| AT2G06166 | 0           | 1           | 0           | 1          |
| AT2G06200 | 0           | 1           | 0           | 1          |
| AT2G07050 | 0           | 1           | 0           | 1          |
| AT2G07110 | 0           | 1           | 0           | 1          |
| AT2G08986 | 0           | 0           | 1           | 1          |
| AT2G10606 | 0           | 1           | 1           | 1          |
| AT2G10608 | 0           | 1           | 0           | 1          |
| AT2G10940 | 0           | 1           | 0           | 1          |
| AT2G10950 | 0           | 1           | 0           | 1          |
| AT2G13650 | 0           | 1           | 0           | 1          |
| AT2G13660 | 0           | 1           | 0           | 1          |
| AT2G14206 | 0           | 1           | 0           | 1          |
| AT2G14210 | 0           | 1           | 0           | 1          |
| AT2G14880 | 1           | 1           | 0           | 1          |
| AT2G14890 | 1           | 1           | 0           | 1          |
| AT2G14900 | 0           | 1           | 0           | 1          |
| AT2G14960 | 1           | 1           | 1           | 1          |
| AT2G15000 | 0           | 1           | 0           | 1          |
| AT2G15430 | 0           | 1           | 0           | 1          |
| AT2G15580 | 0           | 0           | 1           | 1          |
| AT2G15820 | 0           | 1           | 0           | 1          |
| AT2G15830 | 0           | 1           | 0           | 1          |
| AT2G16280 | 0           | 1           | 0           | 1          |
| AT2G16290 | 0           | 1           | 0           | 1          |
| AT2G16340 | 0           | 1           | 0           | 1          |
| AT2G16365 | 1           | 1           | 0           | 1          |
| AT2G16430 | 0           | 1           | 0           | 1          |
| AT2G16440 | 0           | 1           | 0           | 1          |
| AT2G16660 | 0           | 1           | 0           | 1          |

Appendix Table S4

| Name      | PIF3_target | PIF4_target | PIF5_target | PIF_target |
|-----------|-------------|-------------|-------------|------------|
| AT2G16668 | 0           | 1           | 0           | 1          |
| AT2G16676 | 0           | 1           | 0           | 1          |
| AT2G16700 | 0           | 1           | 0           | 1          |
| AT2G16720 | 0           | 1           | 1           | 1          |
| AT2G16730 | 0           | 1           | 0           | 1          |
| AT2G16835 | 0           | 1           | 0           | 1          |
| AT2G16850 | 0           | 1           | 0           | 1          |
| AT2G16860 | 0           | 1           | 0           | 1          |
| AT2G16870 | 0           | 1           | 0           | 1          |
| AT2G17290 | 1           | 1           | 0           | 1          |
| AT2G17295 | 0           | 1           | 0           | 1          |
| AT2G17480 | 0           | 1           | 0           | 1          |
| AT2G17490 | 1           | 0           | 0           | 1          |
| AT2G17500 | 1           | 1           | 0           | 1          |
| AT2G17723 | 0           | 1           | 0           | 1          |
| AT2G17730 | 0           | 1           | 0           | 1          |
| AT2G18000 | 0           | 1           | 0           | 1          |
| AT2G18010 | 0           | 1           | 0           | 1          |
| AT2G18020 | 0           | 1           | 0           | 1          |
| AT2G18080 | 0           | 1           | 0           | 1          |
| AT2G18090 | 1           | 1           | 1           | 1          |
| AT2G18160 | 1           | 1           | 1           | 1          |
| AT2G18162 | 1           | 0           | 1           | 1          |
| AT2G18170 | 1           | 1           | 0           | 1          |
| AT2G18193 | 0           | 1           | 0           | 1          |
| AT2G18196 | 0           | 1           | 0           | 1          |
| AT2G18260 | 0           | 1           | 0           | 1          |
| AT2G18280 | 0           | 1           | 0           | 1          |
| AT2G18290 | 0           | 1           | 0           | 1          |
| AT2G18300 | 1           | 1           | 1           | 1          |
| AT2G18310 | 0           | 1           | 1           | 1          |
| AT2G18350 | 0           | 1           | 1           | 1          |
| AT2G18360 | 0           | 1           | 0           | 1          |
| AT2G18550 | 0           | 1           | 0           | 1          |
| AT2G18560 | 0           | 1           | 0           | 1          |
| AT2G18690 | 0           | 1           | 0           | 1          |
| AT2G18700 | 1           | 1           | 1           | 1          |
| AT2G18721 | 0           | 1           | 0           | 1          |
| AT2G18730 | 0           | 1           | 0           | 1          |
| AT2G18780 | 1           | 1           | 1           | 1          |
| AT2G18790 | 1           | 1           | 1           | 1          |
| AT2G18870 | 0           | 1           | 0           | 1          |
| AT2G18876 | 0           | 1           | 0           | 1          |
| AT2G18950 | 0           | 1           | 0           | 1          |
| AT2G18960 | 0           | 1           | 0           | 1          |
| AT2G18969 | 0           | 0           | 1           | 1          |
| AT2G18970 | 0           | 1           | 0           | 1          |
| AT2G18980 | 0           | 1           | 0           | 1          |
| AT2G19170 | 0           | 1           | 0           | 1          |
| AT2G19180 | 0           | 1           | 1           | 1          |
| AT2G19450 | 0           | 1           | 0           | 1          |

Appendix Table S4

| Name      | PIF3_target | PIF4_target | PIF5_target | PIF_target |
|-----------|-------------|-------------|-------------|------------|
| AT2G19460 | 1           | 1           | 1           | 1          |
| AT2G19660 | 0           | 1           | 0           | 1          |
| AT2G19670 | 0           | 1           | 0           | 1          |
| AT2G19802 | 0           | 1           | 0           | 1          |
| AT2G19806 | 1           | 0           | 1           | 1          |
| AT2G19810 | 0           | 1           | 0           | 1          |
| AT2G19870 | 0           | 1           | 0           | 1          |
| AT2G19880 | 0           | 1           | 0           | 1          |
| AT2G20050 | 0           | 1           | 0           | 1          |
| AT2G20060 | 0           | 1           | 0           | 1          |
| AT2G20100 | 0           | 1           | 0           | 1          |
| AT2G20362 | 0           | 1           | 0           | 1          |
| AT2G20370 | 0           | 1           | 0           | 1          |
| AT2G20515 | 0           | 1           | 1           | 1          |
| AT2G20520 | 0           | 1           | 1           | 1          |
| AT2G20562 | 0           | 1           | 1           | 1          |
| AT2G20570 | 0           | 1           | 1           | 1          |
| AT2G20580 | 0           | 1           | 0           | 1          |
| AT2G20630 | 0           | 1           | 0           | 1          |
| AT2G20635 | 0           | 1           | 0           | 1          |
| AT2G20670 | 0           | 1           | 0           | 1          |
| AT2G20680 | 0           | 1           | 0           | 1          |
| AT2G20723 | 0           | 1           | 0           | 1          |
| AT2G20725 | 0           | 1           | 0           | 1          |
| AT2G20740 | 0           | 1           | 0           | 1          |
| AT2G20750 | 0           | 1           | 1           | 1          |
| AT2G20760 | 0           | 1           | 1           | 1          |
| AT2G20825 | 0           | 1           | 0           | 1          |
| AT2G20830 | 0           | 1           | 0           | 1          |
| AT2G20835 | 0           | 1           | 0           | 1          |
| AT2G20840 | 0           | 1           | 0           | 1          |
| AT2G20980 | 0           | 1           | 0           | 1          |
| AT2G20990 | 0           | 1           | 0           | 1          |
| AT2G21050 | 0           | 1           | 0           | 1          |
| AT2G21170 | 0           | 1           | 0           | 1          |
| AT2G21180 | 0           | 1           | 0           | 1          |
| AT2G21200 | 0           | 1           | 0           | 1          |
| AT2G21210 | 0           | 1           | 1           | 1          |
| AT2G21220 | 0           | 1           | 0           | 1          |
| AT2G21230 | 0           | 1           | 0           | 1          |
| AT2G21500 | 0           | 1           | 0           | 1          |
| AT2G21510 | 1           | 1           | 0           | 1          |
| AT2G21520 | 1           | 1           | 0           | 1          |
| AT2G21580 | 0           | 1           | 0           | 1          |
| AT2G21590 | 0           | 1           | 0           | 1          |
| AT2G21640 | 0           | 1           | 0           | 1          |
| AT2G21650 | 0           | 1           | 0           | 1          |
| AT2G21660 | 0           | 1           | 1           | 1          |
| AT2G21670 | 0           | 1           | 1           | 1          |
| AT2G22070 | 0           | 1           | 0           | 1          |
| AT2G22080 | 0           | 1           | 0           | 1          |



Appendix Table S4

| Name      | PIF3_target | PIF4_target | PIF5_target | PIF_target |
|-----------|-------------|-------------|-------------|------------|
| AT2G22121 | 0           | 1           | 0           | 1          |
| AT2G22122 | 0           | 1           | 0           | 1          |
| AT2G22125 | 0           | 1           | 0           | 1          |
| AT2G22170 | 0           | 1           | 1           | 1          |
| AT2G22180 | 0           | 1           | 1           | 1          |
| AT2G22320 | 0           | 1           | 0           | 1          |
| AT2G22330 | 0           | 1           | 0           | 1          |
| AT2G22426 | 0           | 1           | 1           | 1          |
| AT2G22430 | 0           | 1           | 0           | 1          |
| AT2G22440 | 0           | 1           | 0           | 1          |
| AT2G22496 | 0           | 1           | 0           | 1          |
| AT2G22500 | 0           | 1           | 0           | 1          |
| AT2G22620 | 0           | 1           | 0           | 1          |
| AT2G22630 | 0           | 1           | 0           | 1          |
| AT2G22668 | 0           | 1           | 0           | 1          |
| AT2G22670 | 0           | 1           | 0           | 1          |
| AT2G22750 | 0           | 1           | 0           | 1          |
| AT2G22760 | 0           | 1           | 0           | 1          |
| AT2G22790 | 0           | 1           | 0           | 1          |
| AT2G22795 | 1           | 1           | 1           | 1          |
| AT2G22800 | 0           | 1           | 0           | 1          |
| AT2G22802 | 0           | 1           | 0           | 1          |
| AT2G22805 | 0           | 1           | 0           | 1          |
| AT2G22821 | 0           | 1           | 0           | 1          |
| AT2G22830 | 0           | 1           | 1           | 1          |
| AT2G22840 | 0           | 1           | 1           | 1          |
| AT2G22850 | 0           | 1           | 0           | 1          |
| AT2G22860 | 0           | 1           | 0           | 1          |
| AT2G22900 | 0           | 1           | 0           | 1          |
| AT2G22980 | 0           | 1           | 0           | 1          |
| AT2G22990 | 0           | 1           | 0           | 1          |
| AT2G23000 | 0           | 0           | 1           | 1          |
| AT2G23120 | 0           | 1           | 0           | 1          |
| AT2G23130 | 0           | 1           | 0           | 1          |
| AT2G23150 | 0           | 1           | 0           | 1          |
| AT2G23160 | 0           | 1           | 0           | 1          |
| AT2G23170 | 1           | 0           | 1           | 1          |
| AT2G23171 | 0           | 1           | 1           | 1          |
| AT2G23180 | 0           | 1           | 0           | 1          |
| AT2G23290 | 0           | 1           | 1           | 1          |
| AT2G23300 | 0           | 1           | 0           | 1          |
| AT2G23320 | 0           | 0           | 1           | 1          |
| AT2G23450 | 0           | 1           | 0           | 1          |
| AT2G23460 | 0           | 1           | 0           | 1          |
| AT2G23680 | 0           | 1           | 0           | 1          |
| AT2G23690 | 0           | 1           | 0           | 1          |
| AT2G23700 | 0           | 1           | 0           | 1          |
| AT2G23740 | 0           | 1           | 0           | 1          |
| AT2G23755 | 0           | 1           | 1           | 1          |
| AT2G23760 | 0           | 1           | 0           | 1          |
| AT2G23770 | 0           | 1           | 0           | 1          |

Appendix Table S4

| Name      | PIF3_target | PIF4_target | PIF5_target | PIF_target |
|-----------|-------------|-------------|-------------|------------|
| AT2G24180 | 0           | 1           | 0           | 1          |
| AT2G24210 | 0           | 1           | 1           | 1          |
| AT2G24220 | 0           | 1           | 1           | 1          |
| AT2G24270 | 0           | 1           | 1           | 1          |
| AT2G24280 | 0           | 1           | 1           | 1          |
| AT2G24550 | 0           | 1           | 0           | 1          |
| AT2G24560 | 0           | 1           | 0           | 1          |
| AT2G24570 | 1           | 0           | 1           | 1          |
| AT2G24625 | 0           | 1           | 1           | 1          |
| AT2G24780 | 0           | 1           | 0           | 1          |
| AT2G24790 | 0           | 1           | 0           | 1          |
| AT2G25052 | 0           | 1           | 0           | 1          |
| AT2G25060 | 0           | 1           | 0           | 1          |
| AT2G25430 | 0           | 1           | 1           | 1          |
| AT2G25440 | 0           | 1           | 1           | 1          |
| AT2G25460 | 1           | 1           | 1           | 1          |
| AT2G25470 | 1           | 1           | 1           | 1          |
| AT2G25490 | 0           | 1           | 0           | 1          |
| AT2G25500 | 0           | 1           | 0           | 1          |
| AT2G25530 | 1           | 0           | 0           | 1          |
| AT2G25620 | 0           | 1           | 0           | 1          |
| AT2G25625 | 0           | 1           | 0           | 1          |
| AT2G26000 | 0           | 0           | 1           | 1          |
| AT2G26010 | 0           | 0           | 1           | 1          |
| AT2G26110 | 0           | 1           | 1           | 1          |
| AT2G26120 | 0           | 1           | 1           | 1          |
| AT2G26250 | 1           | 0           | 1           | 1          |
| AT2G26260 | 1           | 0           | 1           | 1          |
| AT2G26360 | 0           | 1           | 0           | 1          |
| AT2G26370 | 0           | 1           | 0           | 1          |
| AT2G26440 | 0           | 1           | 0           | 1          |
| AT2G26450 | 0           | 1           | 0           | 1          |
| AT2G26530 | 0           | 0           | 1           | 1          |
| AT2G26690 | 0           | 1           | 1           | 1          |
| AT2G26695 | 0           | 1           | 0           | 1          |
| AT2G26700 | 0           | 1           | 0           | 1          |
| AT2G26710 | 0           | 1           | 1           | 1          |
| AT2G26730 | 0           | 1           | 0           | 1          |
| AT2G26770 | 0           | 1           | 0           | 1          |
| AT2G26780 | 0           | 1           | 0           | 1          |
| AT2G26900 | 0           | 1           | 0           | 1          |
| AT2G26910 | 0           | 1           | 0           | 1          |
| AT2G27050 | 0           | 1           | 0           | 1          |
| AT2G27060 | 1           | 1           | 1           | 1          |
| AT2G27090 | 0           | 1           | 0           | 1          |
| AT2G27260 | 0           | 1           | 0           | 1          |
| AT2G27490 | 0           | 1           | 0           | 1          |
| AT2G27500 | 1           | 1           | 1           | 1          |
| AT2G27505 | 1           | 0           | 1           | 1          |
| AT2G27540 | 0           | 1           | 0           | 1          |
| AT2G27550 | 0           | 1           | 0           | 1          |

Appendix Table S4

| Name      | PIF3_target | PIF4_target | PIF5_target | PIF_target |
|-----------|-------------|-------------|-------------|------------|
| AT2G27660 | 0           | 1           | 0           | 1          |
| AT2G27680 | 0           | 1           | 0           | 1          |
| AT2G27760 | 0           | 1           | 0           | 1          |
| AT2G27770 | 0           | 1           | 0           | 1          |
| AT2G27820 | 0           | 1           | 0           | 1          |
| AT2G27830 | 0           | 1           | 0           | 1          |
| AT2G27840 | 0           | 1           | 0           | 1          |
| AT2G27860 | 0           | 1           | 0           | 1          |
| AT2G27880 | 0           | 1           | 0           | 1          |
| AT2G28056 | 1           | 1           | 0           | 1          |
| AT2G28060 | 0           | 1           | 0           | 1          |
| AT2G28120 | 0           | 1           | 0           | 1          |
| AT2G28130 | 0           | 1           | 0           | 1          |
| AT2G28140 | 0           | 1           | 0           | 1          |
| AT2G28190 | 0           | 1           | 0           | 1          |
| AT2G28200 | 0           | 1           | 0           | 1          |
| AT2G28315 | 0           | 1           | 0           | 1          |
| AT2G28320 | 0           | 1           | 0           | 1          |
| AT2G28340 | 0           | 1           | 0           | 1          |
| AT2G28350 | 0           | 1           | 0           | 1          |
| AT2G28355 | 0           | 1           | 1           | 1          |
| AT2G28360 | 0           | 1           | 0           | 1          |
| AT2G28400 | 1           | 0           | 0           | 1          |
| AT2G28401 | 0           | 1           | 0           | 1          |
| AT2G28405 | 0           | 1           | 0           | 1          |
| AT2G28490 | 0           | 1           | 0           | 1          |
| AT2G28500 | 0           | 1           | 0           | 1          |
| AT2G28510 | 0           | 1           | 0           | 1          |
| AT2G28520 | 0           | 1           | 0           | 1          |
| AT2G28830 | 0           | 1           | 0           | 1          |
| AT2G28840 | 0           | 1           | 0           | 1          |
| AT2G28850 | 0           | 1           | 0           | 1          |
| AT2G28940 | 0           | 1           | 1           | 1          |
| AT2G28950 | 0           | 1           | 0           | 1          |
| AT2G29452 | 0           | 1           | 0           | 1          |
| AT2G29654 | 0           | 1           | 0           | 1          |
| AT2G29660 | 0           | 1           | 0           | 1          |
| AT2G29720 | 0           | 1           | 1           | 1          |
| AT2G29730 | 0           | 1           | 1           | 1          |
| AT2G29980 | 0           | 1           | 0           | 1          |
| AT2G29990 | 0           | 1           | 0           | 1          |
| AT2G30010 | 0           | 1           | 0           | 1          |
| AT2G30020 | 0           | 1           | 1           | 1          |
| AT2G30032 | 0           | 1           | 0           | 1          |
| AT2G30140 | 0           | 1           | 0           | 1          |
| AT2G30150 | 1           | 1           | 0           | 1          |
| AT2G30230 | 0           | 1           | 0           | 1          |
| AT2G30240 | 0           | 1           | 0           | 1          |
| AT2G30520 | 0           | 1           | 1           | 1          |
| AT2G30530 | 0           | 1           | 1           | 1          |
| AT2G30770 | 1           | 0           | 0           | 1          |

Appendix Table S4

| Name      | PIF3_target | PIF4_target | PIF5_target | PIF_target |
|-----------|-------------|-------------|-------------|------------|
| AT2G30780 | 1           | 0           | 1           | 1          |
| AT2G30980 | 1           | 0           | 0           | 1          |
| AT2G31005 | 0           | 1           | 1           | 1          |
| AT2G31010 | 1           | 1           | 1           | 1          |
| AT2G31082 | 0           | 1           | 0           | 1          |
| AT2G31083 | 0           | 1           | 0           | 1          |
| AT2G31220 | 1           | 0           | 0           | 1          |
| AT2G31360 | 0           | 1           | 0           | 1          |
| AT2G31370 | 0           | 1           | 0           | 1          |
| AT2G31550 | 0           | 0           | 1           | 1          |
| AT2G31560 | 0           | 0           | 1           | 1          |
| AT2G31740 | 1           | 1           | 0           | 1          |
| AT2G31750 | 1           | 1           | 0           | 1          |
| AT2G31930 | 0           | 1           | 0           | 1          |
| AT2G31940 | 0           | 1           | 0           | 1          |
| AT2G31980 | 1           | 0           | 1           | 1          |
| AT2G31981 | 0           | 1           | 1           | 1          |
| AT2G31990 | 0           | 1           | 0           | 1          |
| AT2G32090 | 0           | 1           | 0           | 1          |
| AT2G32100 | 0           | 1           | 0           | 1          |
| AT2G32140 | 0           | 0           | 1           | 1          |
| AT2G32150 | 0           | 1           | 1           | 1          |
| AT2G32415 | 0           | 1           | 0           | 1          |
| AT2G32430 | 0           | 1           | 0           | 1          |
| AT2G32510 | 0           | 1           | 0           | 1          |
| AT2G32550 | 0           | 1           | 0           | 1          |
| AT2G32560 | 0           | 1           | 0           | 1          |
| AT2G32710 | 0           | 1           | 0           | 1          |
| AT2G32720 | 0           | 1           | 0           | 1          |
| AT2G32930 | 1           | 1           | 0           | 1          |
| AT2G32940 | 0           | 1           | 1           | 1          |
| AT2G32970 | 0           | 1           | 0           | 1          |
| AT2G32980 | 0           | 1           | 0           | 1          |
| AT2G33040 | 0           | 1           | 1           | 1          |
| AT2G33050 | 0           | 1           | 1           | 1          |
| AT2G33175 | 0           | 1           | 0           | 1          |
| AT2G33180 | 0           | 1           | 1           | 1          |
| AT2G33210 | 0           | 1           | 0           | 1          |
| AT2G33233 | 0           | 1           | 0           | 1          |
| AT2G33240 | 0           | 1           | 0           | 1          |
| AT2G33310 | 0           | 1           | 0           | 1          |
| AT2G33360 | 0           | 1           | 0           | 1          |
| AT2G33380 | 1           | 0           | 1           | 1          |
| AT2G33385 | 0           | 0           | 1           | 1          |
| AT2G33560 | 0           | 1           | 0           | 1          |
| AT2G33570 | 0           | 1           | 0           | 1          |
| AT2G33710 | 0           | 1           | 0           | 1          |
| AT2G33720 | 0           | 1           | 0           | 1          |
| AT2G33800 | 0           | 1           | 0           | 1          |
| AT2G33810 | 0           | 1           | 0           | 1          |
| AT2G34020 | 1           | 1           | 0           | 1          |

Appendix Table S4

| Name      | PIF3_target | PIF4_target | PIF5_target | PIF_target |
|-----------|-------------|-------------|-------------|------------|
| AT2G34030 | 0           | 1           | 0           | 1          |
| AT2G34070 | 0           | 1           | 1           | 1          |
| AT2G34110 | 0           | 1           | 0           | 1          |
| AT2G34150 | 0           | 1           | 0           | 1          |
| AT2G34160 | 0           | 1           | 0           | 1          |
| AT2G34180 | 1           | 1           | 0           | 1          |
| AT2G34185 | 1           | 1           | 0           | 1          |
| AT2G34186 | 1           | 1           | 1           | 1          |
| AT2G34190 | 1           | 1           | 1           | 1          |
| AT2G34315 | 0           | 1           | 0           | 1          |
| AT2G34640 | 0           | 1           | 0           | 1          |
| AT2G34650 | 1           | 1           | 0           | 1          |
| AT2G34655 | 1           | 0           | 0           | 1          |
| AT2G34710 | 0           | 1           | 0           | 1          |
| AT2G34720 | 0           | 1           | 0           | 1          |
| AT2G34930 | 0           | 1           | 1           | 1          |
| AT2G34940 | 0           | 1           | 1           | 1          |
| AT2G34985 | 0           | 1           | 0           | 1          |
| AT2G35160 | 0           | 1           | 0           | 1          |
| AT2G35170 | 0           | 1           | 0           | 1          |
| AT2G35200 | 0           | 1           | 0           | 1          |
| AT2G35208 | 0           | 1           | 0           | 1          |
| AT2G35260 | 0           | 1           | 0           | 1          |
| AT2G35460 | 0           | 1           | 0           | 1          |
| AT2G35470 | 0           | 1           | 0           | 1          |
| AT2G35620 | 0           | 1           | 0           | 1          |
| AT2G35630 | 0           | 1           | 0           | 1          |
| AT2G35700 | 0           | 1           | 0           | 1          |
| AT2G35710 | 1           | 1           | 1           | 1          |
| AT2G35720 | 1           | 0           | 1           | 1          |
| AT2G35850 | 0           | 1           | 0           | 1          |
| AT2G35860 | 0           | 1           | 1           | 1          |
| AT2G35880 | 1           | 1           | 1           | 1          |
| AT2G35890 | 0           | 1           | 0           | 1          |
| AT2G35940 | 0           | 1           | 0           | 1          |
| AT2G35950 | 0           | 1           | 0           | 1          |
| AT2G36050 | 0           | 1           | 1           | 1          |
| AT2G36053 | 0           | 1           | 1           | 1          |
| AT2G36060 | 0           | 1           | 0           | 1          |
| AT2G36080 | 1           | 1           | 0           | 1          |
| AT2G36090 | 1           | 1           | 0           | 1          |
| AT2G36190 | 0           | 1           | 0           | 1          |
| AT2G36261 | 0           | 0           | 1           | 1          |
| AT2G36270 | 0           | 1           | 1           | 1          |
| AT2G36280 | 0           | 1           | 0           | 1          |
| AT2G36310 | 0           | 1           | 0           | 1          |
| AT2G36320 | 0           | 1           | 0           | 1          |
| AT2G36400 | 0           | 1           | 0           | 1          |
| AT2G36410 | 0           | 1           | 1           | 1          |
| AT2G36870 | 0           | 1           | 0           | 1          |
| AT2G36880 | 0           | 1           | 0           | 1          |

Appendix Table S4

| Name      | PIF3_target | PIF4_target | PIF5_target | PIF_target |
|-----------|-------------|-------------|-------------|------------|
| AT2G36881 | 0           | 1           | 0           | 1          |
| AT2G36910 | 0           | 1           | 0           | 1          |
| AT2G36950 | 0           | 1           | 0           | 1          |
| AT2G37025 | 0           | 1           | 0           | 1          |
| AT2G37030 | 0           | 1           | 0           | 1          |
| AT2G37040 | 0           | 1           | 0           | 1          |
| AT2G37050 | 0           | 1           | 0           | 1          |
| AT2G37170 | 0           | 1           | 0           | 1          |
| AT2G37180 | 0           | 1           | 0           | 1          |
| AT2G37270 | 0           | 1           | 0           | 1          |
| AT2G37280 | 0           | 1           | 0           | 1          |
| AT2G37555 | 0           | 1           | 0           | 1          |
| AT2G37630 | 0           | 1           | 0           | 1          |
| AT2G37640 | 0           | 1           | 0           | 1          |
| AT2G37650 | 0           | 1           | 0           | 1          |
| AT2G37678 | 0           | 1           | 0           | 1          |
| AT2G37680 | 0           | 1           | 0           | 1          |
| AT2G37710 | 0           | 0           | 1           | 1          |
| AT2G37720 | 0           | 0           | 1           | 1          |
| AT2G37930 | 0           | 1           | 1           | 1          |
| AT2G37940 | 0           | 1           | 1           | 1          |
| AT2G38050 | 0           | 1           | 0           | 1          |
| AT2G38060 | 0           | 1           | 0           | 1          |
| AT2G38070 | 0           | 1           | 0           | 1          |
| AT2G38080 | 0           | 1           | 0           | 1          |
| AT2G38090 | 0           | 1           | 0           | 1          |
| AT2G38110 | 0           | 1           | 0           | 1          |
| AT2G38120 | 0           | 1           | 1           | 1          |
| AT2G38130 | 0           | 1           | 0           | 1          |
| AT2G38170 | 0           | 1           | 0           | 1          |
| AT2G38180 | 0           | 1           | 0           | 1          |
| AT2G38240 | 0           | 0           | 1           | 1          |
| AT2G38310 | 0           | 1           | 0           | 1          |
| AT2G38320 | 0           | 1           | 0           | 1          |
| AT2G38390 | 0           | 1           | 0           | 1          |
| AT2G38400 | 0           | 1           | 1           | 1          |
| AT2G38465 | 0           | 0           | 1           | 1          |
| AT2G38470 | 0           | 0           | 1           | 1          |
| AT2G38510 | 0           | 1           | 0           | 1          |
| AT2G38530 | 0           | 1           | 1           | 1          |
| AT2G39000 | 0           | 1           | 1           | 1          |
| AT2G39010 | 0           | 1           | 1           | 1          |
| AT2G39130 | 0           | 1           | 0           | 1          |
| AT2G39170 | 0           | 1           | 0           | 1          |
| AT2G39175 | 0           | 1           | 0           | 1          |
| AT2G39200 | 1           | 1           | 0           | 1          |
| AT2G39210 | 0           | 1           | 1           | 1          |
| AT2G39220 | 0           | 1           | 0           | 1          |
| AT2G39230 | 0           | 1           | 0           | 1          |
| AT2G39450 | 1           | 1           | 1           | 1          |
| AT2G39460 | 1           | 1           | 1           | 1          |

Appendix Table S4

| Name      | PIF3_target | PIF4_target | PIF5_target | PIF_target |
|-----------|-------------|-------------|-------------|------------|
| AT2G39480 | 0           | 1           | 0           | 1          |
| AT2G39490 | 0           | 1           | 0           | 1          |
| AT2G39700 | 0           | 1           | 0           | 1          |
| AT2G39705 | 0           | 1           | 0           | 1          |
| AT2G39710 | 0           | 1           | 0           | 1          |
| AT2G39760 | 0           | 1           | 0           | 1          |
| AT2G39770 | 0           | 1           | 1           | 1          |
| AT2G39860 | 0           | 1           | 1           | 1          |
| AT2G39865 | 0           | 1           | 0           | 1          |
| AT2G39870 | 0           | 1           | 1           | 1          |
| AT2G39920 | 0           | 1           | 0           | 1          |
| AT2G39930 | 0           | 1           | 0           | 1          |
| AT2G39950 | 0           | 1           | 0           | 1          |
| AT2G39960 | 0           | 1           | 0           | 1          |
| AT2G39980 | 0           | 1           | 0           | 1          |
| AT2G39990 | 0           | 1           | 0           | 1          |
| AT2G40000 | 0           | 1           | 0           | 1          |
| AT2G40004 | 0           | 1           | 0           | 1          |
| AT2G40008 | 1           | 1           | 1           | 1          |
| AT2G40260 | 0           | 1           | 0           | 1          |
| AT2G40270 | 1           | 1           | 1           | 1          |
| AT2G40280 | 0           | 1           | 1           | 1          |
| AT2G40300 | 1           | 0           | 0           | 1          |
| AT2G40310 | 1           | 0           | 0           | 1          |
| AT2G40475 | 0           | 1           | 0           | 1          |
| AT2G40480 | 0           | 1           | 0           | 1          |
| AT2G40540 | 1           | 1           | 1           | 1          |
| AT2G40610 | 1           | 1           | 1           | 1          |
| AT2G40620 | 0           | 1           | 0           | 1          |
| AT2G40640 | 0           | 1           | 1           | 1          |
| AT2G40690 | 0           | 1           | 0           | 1          |
| AT2G40700 | 0           | 1           | 0           | 1          |
| AT2G40800 | 0           | 1           | 0           | 1          |
| AT2G40802 | 0           | 1           | 0           | 1          |
| AT2G40940 | 0           | 0           | 1           | 1          |
| AT2G40950 | 0           | 0           | 1           | 1          |
| AT2G40970 | 1           | 1           | 0           | 1          |
| AT2G40980 | 1           | 1           | 0           | 1          |
| AT2G41060 | 0           | 1           | 0           | 1          |
| AT2G41070 | 1           | 1           | 1           | 1          |
| AT2G41090 | 0           | 1           | 0           | 1          |
| AT2G41100 | 0           | 1           | 0           | 1          |
| AT2G41110 | 0           | 1           | 0           | 1          |
| AT2G41140 | 0           | 1           | 0           | 1          |
| AT2G41170 | 0           | 1           | 0           | 1          |
| AT2G41178 | 0           | 1           | 0           | 1          |
| AT2G41300 | 1           | 1           | 0           | 1          |
| AT2G41310 | 1           | 1           | 0           | 1          |
| AT2G41370 | 0           | 1           | 0           | 1          |
| AT2G41380 | 0           | 1           | 0           | 1          |
| AT2G41400 | 0           | 1           | 0           | 1          |

Appendix Table S4

| Name      | PIF3_target | PIF4_target | PIF5_target | PIF_target |
|-----------|-------------|-------------|-------------|------------|
| AT2G41410 | 0           | 1           | 0           | 1          |
| AT2G41420 | 0           | 1           | 0           | 1          |
| AT2G41430 | 0           | 1           | 0           | 1          |
| AT2G41500 | 0           | 0           | 1           | 1          |
| AT2G41630 | 0           | 1           | 1           | 1          |
| AT2G41640 | 0           | 1           | 1           | 1          |
| AT2G41740 | 0           | 1           | 0           | 1          |
| AT2G41745 | 1           | 0           | 1           | 1          |
| AT2G41750 | 0           | 1           | 1           | 1          |
| AT2G41810 | 0           | 1           | 0           | 1          |
| AT2G41820 | 0           | 1           | 0           | 1          |
| AT2G41850 | 1           | 0           | 0           | 1          |
| AT2G41870 | 0           | 1           | 0           | 1          |
| AT2G41880 | 0           | 1           | 0           | 1          |
| AT2G41890 | 0           | 1           | 0           | 1          |
| AT2G41900 | 0           | 1           | 0           | 1          |
| AT2G41930 | 0           | 1           | 0           | 1          |
| AT2G41940 | 0           | 1           | 0           | 1          |
| AT2G41945 | 0           | 1           | 1           | 1          |
| AT2G42010 | 0           | 1           | 0           | 1          |
| AT2G42030 | 0           | 1           | 0           | 1          |
| AT2G42040 | 0           | 1           | 0           | 1          |
| AT2G42140 | 0           | 1           | 0           | 1          |
| AT2G42150 | 0           | 1           | 0           | 1          |
| AT2G42280 | 1           | 1           | 1           | 1          |
| AT2G42290 | 0           | 1           | 0           | 1          |
| AT2G42365 | 0           | 1           | 0           | 1          |
| AT2G42380 | 0           | 1           | 0           | 1          |
| AT2G42388 | 0           | 1           | 0           | 1          |
| AT2G42430 | 0           | 1           | 0           | 1          |
| AT2G42440 | 0           | 1           | 0           | 1          |
| AT2G42570 | 0           | 1           | 0           | 1          |
| AT2G42580 | 0           | 1           | 0           | 1          |
| AT2G42600 | 0           | 1           | 0           | 1          |
| AT2G42610 | 0           | 1           | 1           | 1          |
| AT2G42620 | 1           | 1           | 0           | 1          |
| AT2G42660 | 1           | 0           | 0           | 1          |
| AT2G42690 | 0           | 1           | 0           | 1          |
| AT2G42700 | 0           | 1           | 0           | 1          |
| AT2G42800 | 0           | 1           | 0           | 1          |
| AT2G42810 | 0           | 1           | 0           | 1          |
| AT2G42820 | 0           | 1           | 0           | 1          |
| AT2G42830 | 0           | 1           | 0           | 1          |
| AT2G42870 | 1           | 1           | 1           | 1          |
| AT2G42880 | 0           | 1           | 1           | 1          |
| AT2G42900 | 0           | 1           | 0           | 1          |
| AT2G42955 | 0           | 1           | 0           | 1          |
| AT2G42960 | 0           | 1           | 0           | 1          |
| AT2G43000 | 0           | 1           | 0           | 1          |
| AT2G43010 | 0           | 1           | 1           | 1          |
| AT2G43018 | 0           | 0           | 1           | 1          |



Appendix Table S4

| Name      | PIF3_target | PIF4_target | PIF5_target | PIF_target |
|-----------|-------------|-------------|-------------|------------|
| AT2G43020 | 0           | 1           | 0           | 1          |
| AT2G43050 | 0           | 1           | 0           | 1          |
| AT2G43060 | 1           | 1           | 1           | 1          |
| AT2G43130 | 0           | 1           | 0           | 1          |
| AT2G43140 | 0           | 1           | 1           | 1          |
| AT2G43320 | 0           | 1           | 0           | 1          |
| AT2G43330 | 0           | 1           | 0           | 1          |
| AT2G43340 | 1           | 1           | 0           | 1          |
| AT2G43610 | 1           | 0           | 1           | 1          |
| AT2G43670 | 0           | 1           | 0           | 1          |
| AT2G43680 | 0           | 1           | 0           | 1          |
| AT2G43700 | 0           | 0           | 1           | 1          |
| AT2G43710 | 0           | 0           | 1           | 1          |
| AT2G43910 | 0           | 1           | 0           | 1          |
| AT2G43920 | 0           | 1           | 0           | 1          |
| AT2G44070 | 0           | 1           | 0           | 1          |
| AT2G44080 | 0           | 1           | 0           | 1          |
| AT2G44120 | 0           | 1           | 1           | 1          |
| AT2G44130 | 0           | 0           | 1           | 1          |
| AT2G44140 | 0           | 1           | 0           | 1          |
| AT2G44440 | 1           | 0           | 0           | 1          |
| AT2G44450 | 1           | 0           | 0           | 1          |
| AT2G44480 | 0           | 1           | 0           | 1          |
| AT2G44490 | 0           | 1           | 1           | 1          |
| AT2G44500 | 1           | 1           | 1           | 1          |
| AT2G44660 | 0           | 1           | 1           | 1          |
| AT2G44670 | 0           | 1           | 1           | 1          |
| AT2G44735 | 0           | 1           | 0           | 1          |
| AT2G44740 | 1           | 1           | 1           | 1          |
| AT2G44745 | 0           | 1           | 0           | 1          |
| AT2G44798 | 0           | 1           | 0           | 1          |
| AT2G44810 | 0           | 1           | 0           | 1          |
| AT2G44820 | 0           | 1           | 0           | 1          |
| AT2G44910 | 1           | 1           | 1           | 1          |
| AT2G44920 | 1           | 1           | 1           | 1          |
| AT2G45040 | 0           | 1           | 0           | 1          |
| AT2G45050 | 1           | 1           | 0           | 1          |
| AT2G45180 | 0           | 1           | 0           | 1          |
| AT2G45190 | 0           | 1           | 0           | 1          |
| AT2G45200 | 0           | 1           | 0           | 1          |
| AT2G45210 | 0           | 1           | 0           | 1          |
| AT2G45300 | 0           | 1           | 0           | 1          |
| AT2G45310 | 0           | 1           | 0           | 1          |
| AT2G45315 | 0           | 0           | 1           | 1          |
| AT2G45412 | 0           | 1           | 0           | 1          |
| AT2G45420 | 0           | 1           | 0           | 1          |
| AT2G45430 | 0           | 1           | 0           | 1          |
| AT2G45440 | 0           | 1           | 1           | 1          |
| AT2G45450 | 0           | 1           | 1           | 1          |
| AT2G45470 | 0           | 1           | 0           | 1          |
| AT2G45480 | 0           | 1           | 0           | 1          |

Appendix Table S4

| Name      | PIF3_target | PIF4_target | PIF5_target | PIF_target |
|-----------|-------------|-------------|-------------|------------|
| AT2G45580 | 0           | 1           | 0           | 1          |
| AT2G45590 | 0           | 1           | 0           | 1          |
| AT2G45600 | 0           | 1           | 0           | 1          |
| AT2G45660 | 0           | 1           | 0           | 1          |
| AT2G45670 | 0           | 1           | 1           | 1          |
| AT2G45680 | 0           | 1           | 0           | 1          |
| AT2G45685 | 0           | 1           | 0           | 1          |
| AT2G45690 | 0           | 1           | 0           | 1          |
| AT2G45710 | 0           | 1           | 0           | 1          |
| AT2G45720 | 0           | 1           | 0           | 1          |
| AT2G45730 | 1           | 0           | 0           | 1          |
| AT2G45740 | 1           | 0           | 0           | 1          |
| AT2G45820 | 0           | 1           | 0           | 1          |
| AT2G45830 | 0           | 1           | 0           | 1          |
| AT2G45950 | 0           | 1           | 1           | 1          |
| AT2G45960 | 0           | 1           | 1           | 1          |
| AT2G45970 | 0           | 1           | 0           | 1          |
| AT2G46040 | 0           | 1           | 0           | 1          |
| AT2G46050 | 0           | 1           | 0           | 1          |
| AT2G46160 | 0           | 1           | 0           | 1          |
| AT2G46170 | 0           | 1           | 0           | 1          |
| AT2G46220 | 0           | 1           | 0           | 1          |
| AT2G46225 | 1           | 1           | 0           | 1          |
| AT2G46260 | 0           | 1           | 0           | 1          |
| AT2G46270 | 1           | 1           | 1           | 1          |
| AT2G46290 | 1           | 0           | 0           | 1          |
| AT2G46300 | 1           | 0           | 0           | 1          |
| AT2G46308 | 0           | 0           | 1           | 1          |
| AT2G46330 | 1           | 0           | 1           | 1          |
| AT2G46340 | 0           | 1           | 0           | 1          |
| AT2G46360 | 0           | 1           | 0           | 1          |
| AT2G46410 | 0           | 0           | 1           | 1          |
| AT2G46420 | 0           | 0           | 1           | 1          |
| AT2G46510 | 0           | 1           | 1           | 1          |
| AT2G46520 | 0           | 1           | 1           | 1          |
| AT2G46530 | 1           | 1           | 0           | 1          |
| AT2G46535 | 1           | 0           | 0           | 1          |
| AT2G46580 | 1           | 1           | 0           | 1          |
| AT2G46590 | 1           | 1           | 0           | 1          |
| AT2G46600 | 0           | 1           | 0           | 1          |
| AT2G46660 | 0           | 1           | 0           | 1          |
| AT2G46662 | 0           | 1           | 0           | 1          |
| AT2G46680 | 0           | 1           | 0           | 1          |
| AT2G46685 | 0           | 1           | 0           | 1          |
| AT2G46700 | 0           | 1           | 0           | 1          |
| AT2G46710 | 0           | 1           | 0           | 1          |
| AT2G46770 | 1           | 1           | 0           | 1          |
| AT2G46780 | 1           | 1           | 1           | 1          |
| AT2G46787 | 0           | 1           | 0           | 1          |
| AT2G46790 | 1           | 1           | 0           | 1          |
| AT2G46800 | 0           | 1           | 0           | 1          |

Appendix Table S4

| Name      | PIF3_target | PIF4_target | PIF5_target | PIF_target |
|-----------|-------------|-------------|-------------|------------|
| AT2G46820 | 0           | 1           | 0           | 1          |
| AT2G46830 | 0           | 1           | 0           | 1          |
| AT2G46860 | 0           | 1           | 0           | 1          |
| AT2G46870 | 0           | 1           | 0           | 1          |
| AT2G46970 | 1           | 1           | 1           | 1          |
| AT2G46980 | 0           | 1           | 1           | 1          |
| AT2G47000 | 0           | 1           | 0           | 1          |
| AT2G47010 | 0           | 1           | 1           | 1          |
| AT2G47015 | 0           | 0           | 1           | 1          |
| AT2G47020 | 0           | 1           | 0           | 1          |
| AT2G47060 | 0           | 1           | 0           | 1          |
| AT2G47070 | 0           | 1           | 0           | 1          |
| AT2G47160 | 1           | 1           | 1           | 1          |
| AT2G47170 | 1           | 1           | 0           | 1          |
| AT2G47340 | 0           | 1           | 0           | 1          |
| AT2G47350 | 0           | 1           | 0           | 1          |
| AT2G47430 | 1           | 1           | 1           | 1          |
| AT2G47440 | 1           | 1           | 0           | 1          |
| AT2G47490 | 0           | 1           | 0           | 1          |
| AT2G47500 | 1           | 1           | 0           | 1          |
| AT2G47770 | 0           | 1           | 0           | 1          |
| AT2G47780 | 0           | 1           | 0           | 1          |
| AT2G47830 | 0           | 1           | 0           | 1          |
| AT2G47840 | 0           | 1           | 0           | 1          |
| AT2G47930 | 0           | 1           | 0           | 1          |
| AT2G47940 | 0           | 1           | 0           | 1          |
| AT2G48010 | 0           | 0           | 1           | 1          |
| AT2G48020 | 0           | 0           | 1           | 1          |
| AT3G01070 | 0           | 1           | 0           | 1          |
| AT3G01080 | 0           | 1           | 0           | 1          |
| AT3G01360 | 0           | 1           | 0           | 1          |
| AT3G01370 | 0           | 1           | 0           | 1          |
| AT3G01470 | 0           | 1           | 0           | 1          |
| AT3G01472 | 0           | 1           | 0           | 1          |
| AT3G01480 | 0           | 1           | 0           | 1          |
| AT3G01490 | 0           | 1           | 1           | 1          |
| AT3G01500 | 0           | 1           | 0           | 1          |
| AT3G01513 | 0           | 1           | 0           | 1          |
| AT3G01516 | 0           | 1           | 0           | 1          |
| AT3G01550 | 0           | 1           | 0           | 1          |
| AT3G01560 | 0           | 1           | 0           | 1          |
| AT3G01690 | 0           | 0           | 1           | 1          |
| AT3G01740 | 0           | 1           | 0           | 1          |
| AT3G01750 | 0           | 1           | 0           | 1          |
| AT3G01850 | 0           | 1           | 0           | 1          |
| AT3G01860 | 0           | 1           | 0           | 1          |
| AT3G02110 | 0           | 1           | 0           | 1          |
| AT3G02120 | 0           | 1           | 0           | 1          |
| AT3G02140 | 1           | 1           | 1           | 1          |
| AT3G02150 | 1           | 1           | 0           | 1          |
| AT3G02170 | 0           | 1           | 1           | 1          |

Appendix Table S4

| Name      | PIF3_target | PIF4_target | PIF5_target | PIF_target |
|-----------|-------------|-------------|-------------|------------|
| AT3G02180 | 0           | 1           | 0           | 1          |
| AT3G02460 | 0           | 1           | 0           | 1          |
| AT3G02470 | 0           | 1           | 0           | 1          |
| AT3G02493 | 0           | 1           | 0           | 1          |
| AT3G02500 | 0           | 1           | 0           | 1          |
| AT3G02540 | 0           | 1           | 0           | 1          |
| AT3G02550 | 0           | 1           | 1           | 1          |
| AT3G02555 | 0           | 1           | 0           | 1          |
| AT3G02570 | 1           | 1           | 1           | 1          |
| AT3G02580 | 1           | 1           | 1           | 1          |
| AT3G02830 | 0           | 1           | 0           | 1          |
| AT3G02840 | 0           | 1           | 0           | 1          |
| AT3G02980 | 1           | 1           | 0           | 1          |
| AT3G02990 | 1           | 1           | 0           | 1          |
| AT3G03150 | 0           | 1           | 0           | 1          |
| AT3G03160 | 0           | 1           | 0           | 1          |
| AT3G03170 | 0           | 1           | 0           | 1          |
| AT3G03200 | 0           | 1           | 0           | 1          |
| AT3G03210 | 0           | 1           | 0           | 1          |
| AT3G03456 | 0           | 1           | 0           | 1          |
| AT3G03460 | 0           | 1           | 0           | 1          |
| AT3G03626 | 0           | 1           | 0           | 1          |
| AT3G03790 | 1           | 0           | 1           | 1          |
| AT3G03820 | 0           | 1           | 0           | 1          |
| AT3G03826 | 0           | 1           | 0           | 1          |
| AT3G03830 | 0           | 1           | 0           | 1          |
| AT3G03840 | 0           | 1           | 0           | 1          |
| AT3G03847 | 0           | 1           | 1           | 1          |
| AT3G03850 | 0           | 1           | 1           | 1          |
| AT3G03870 | 0           | 1           | 1           | 1          |
| AT3G03990 | 0           | 1           | 0           | 1          |
| AT3G04110 | 0           | 1           | 0           | 1          |
| AT3G04120 | 0           | 1           | 0           | 1          |
| AT3G04370 | 0           | 1           | 0           | 1          |
| AT3G04380 | 0           | 1           | 0           | 1          |
| AT3G04420 | 0           | 1           | 0           | 1          |
| AT3G04430 | 0           | 1           | 0           | 1          |
| AT3G04470 | 0           | 1           | 0           | 1          |
| AT3G04480 | 0           | 1           | 0           | 1          |
| AT3G04670 | 0           | 1           | 0           | 1          |
| AT3G04680 | 0           | 1           | 0           | 1          |
| AT3G04721 | 0           | 1           | 1           | 1          |
| AT3G04730 | 0           | 1           | 1           | 1          |
| AT3G04732 | 0           | 1           | 1           | 1          |
| AT3G04735 | 0           | 1           | 0           | 1          |
| AT3G04855 | 1           | 1           | 1           | 1          |
| AT3G04860 | 0           | 1           | 0           | 1          |
| AT3G04870 | 0           | 1           | 0           | 1          |
| AT3G04903 | 0           | 1           | 0           | 1          |
| AT3G04910 | 0           | 1           | 1           | 1          |
| AT3G04920 | 1           | 1           | 1           | 1          |

Appendix Table S4

| Name      | PIF3_target | PIF4_target | PIF5_target | PIF_target |
|-----------|-------------|-------------|-------------|------------|
| AT3G04930 | 0           | 1           | 0           | 1          |
| AT3G04940 | 0           | 1           | 0           | 1          |
| AT3G05020 | 0           | 1           | 0           | 1          |
| AT3G05030 | 0           | 1           | 0           | 1          |
| AT3G05110 | 0           | 1           | 1           | 1          |
| AT3G05120 | 0           | 1           | 1           | 1          |
| AT3G05165 | 0           | 1           | 1           | 1          |
| AT3G05170 | 0           | 1           | 1           | 1          |
| AT3G05220 | 0           | 1           | 0           | 1          |
| AT3G05230 | 0           | 1           | 0           | 1          |
| AT3G05625 | 0           | 1           | 0           | 1          |
| AT3G05630 | 0           | 1           | 0           | 1          |
| AT3G05640 | 0           | 1           | 1           | 1          |
| AT3G05650 | 0           | 1           | 0           | 1          |
| AT3G05820 | 0           | 1           | 0           | 1          |
| AT3G05830 | 0           | 1           | 0           | 1          |
| AT3G05835 | 0           | 1           | 0           | 1          |
| AT3G05840 | 0           | 1           | 0           | 1          |
| AT3G05880 | 0           | 1           | 1           | 1          |
| AT3G05890 | 1           | 1           | 0           | 1          |
| AT3G05905 | 1           | 1           | 0           | 1          |
| AT3G05910 | 0           | 1           | 1           | 1          |
| AT3G05920 | 0           | 1           | 1           | 1          |
| AT3G06060 | 1           | 1           | 0           | 1          |
| AT3G06070 | 0           | 1           | 0           | 1          |
| AT3G06080 | 0           | 1           | 0           | 1          |
| AT3G06120 | 0           | 1           | 0           | 1          |
| AT3G06125 | 1           | 1           | 1           | 1          |
| AT3G06160 | 0           | 1           | 0           | 1          |
| AT3G06410 | 0           | 1           | 0           | 1          |
| AT3G06420 | 0           | 1           | 0           | 1          |
| AT3G06480 | 0           | 1           | 0           | 1          |
| AT3G06490 | 0           | 1           | 0           | 1          |
| AT3G06500 | 0           | 1           | 0           | 1          |
| AT3G06580 | 1           | 0           | 1           | 1          |
| AT3G06590 | 0           | 1           | 1           | 1          |
| AT3G06600 | 0           | 1           | 0           | 1          |
| AT3G06650 | 0           | 1           | 0           | 1          |
| AT3G06740 | 0           | 1           | 0           | 1          |
| AT3G06750 | 1           | 1           | 1           | 1          |
| AT3G06760 | 1           | 1           | 1           | 1          |
| AT3G06770 | 1           | 1           | 0           | 1          |
| AT3G06778 | 0           | 1           | 0           | 1          |
| AT3G06780 | 0           | 1           | 0           | 1          |
| AT3G06868 | 1           | 1           | 0           | 1          |
| AT3G06880 | 0           | 1           | 0           | 1          |
| AT3G06890 | 0           | 0           | 1           | 1          |
| AT3G06895 | 0           | 0           | 1           | 1          |
| AT3G07005 | 0           | 1           | 0           | 1          |
| AT3G07010 | 0           | 1           | 1           | 1          |
| AT3G07310 | 0           | 1           | 0           | 1          |

Appendix Table S4

| Name      | PIF3_target | PIF4_target | PIF5_target | PIF_target |
|-----------|-------------|-------------|-------------|------------|
| AT3G07320 | 0           | 1           | 0           | 1          |
| AT3G07340 | 0           | 1           | 0           | 1          |
| AT3G07350 | 0           | 1           | 1           | 1          |
| AT3G07360 | 1           | 1           | 0           | 1          |
| AT3G07380 | 1           | 1           | 1           | 1          |
| AT3G07390 | 1           | 1           | 1           | 1          |
| AT3G07460 | 0           | 1           | 0           | 1          |
| AT3G07470 | 0           | 1           | 0           | 1          |
| AT3G07480 | 0           | 1           | 0           | 1          |
| AT3G07560 | 0           | 1           | 0           | 1          |
| AT3G07570 | 0           | 1           | 0           | 1          |
| AT3G08020 | 1           | 1           | 1           | 1          |
| AT3G08030 | 1           | 1           | 1           | 1          |
| AT3G08580 | 0           | 1           | 0           | 1          |
| AT3G08590 | 0           | 1           | 0           | 1          |
| AT3G08600 | 0           | 1           | 0           | 1          |
| AT3G08610 | 0           | 1           | 0           | 1          |
| AT3G08636 | 0           | 1           | 0           | 1          |
| AT3G08660 | 0           | 1           | 1           | 1          |
| AT3G08670 | 0           | 1           | 1           | 1          |
| AT3G08720 | 0           | 1           | 0           | 1          |
| AT3G08730 | 0           | 1           | 0           | 1          |
| AT3G08880 | 0           | 1           | 0           | 1          |
| AT3G08890 | 0           | 1           | 0           | 1          |
| AT3G08930 | 0           | 1           | 0           | 1          |
| AT3G08940 | 0           | 1           | 0           | 1          |
| AT3G08990 | 0           | 1           | 0           | 1          |
| AT3G09000 | 0           | 1           | 0           | 1          |
| AT3G09035 | 0           | 1           | 0           | 1          |
| AT3G09040 | 0           | 1           | 0           | 1          |
| AT3G09300 | 0           | 1           | 0           | 1          |
| AT3G09680 | 0           | 1           | 1           | 1          |
| AT3G09690 | 0           | 1           | 1           | 1          |
| AT3G09720 | 0           | 1           | 1           | 1          |
| AT3G09730 | 0           | 1           | 1           | 1          |
| AT3G09970 | 0           | 1           | 1           | 1          |
| AT3G09975 | 0           | 1           | 1           | 1          |
| AT3G10320 | 0           | 1           | 0           | 1          |
| AT3G10330 | 0           | 1           | 0           | 1          |
| AT3G10415 | 0           | 1           | 1           | 1          |
| AT3G10420 | 0           | 1           | 1           | 1          |
| AT3G10720 | 0           | 1           | 1           | 1          |
| AT3G10760 | 0           | 1           | 0           | 1          |
| AT3G10770 | 0           | 1           | 0           | 1          |
| AT3G10910 | 0           | 1           | 0           | 1          |
| AT3G10915 | 0           | 1           | 0           | 1          |
| AT3G10920 | 0           | 1           | 0           | 1          |
| AT3G10960 | 1           | 0           | 1           | 1          |
| AT3G10974 | 0           | 1           | 0           | 1          |
| AT3G10980 | 1           | 1           | 0           | 1          |
| AT3G10985 | 0           | 1           | 0           | 1          |

Appendix Table S4

| Name      | PIF3_target | PIF4_target | PIF5_target | PIF_target |
|-----------|-------------|-------------|-------------|------------|
| AT3G10986 | 0           | 1           | 0           | 1          |
| AT3G11410 | 0           | 1           | 0           | 1          |
| AT3G11420 | 0           | 1           | 0           | 1          |
| AT3G11490 | 0           | 1           | 1           | 1          |
| AT3G11500 | 0           | 1           | 1           | 1          |
| AT3G11580 | 0           | 1           | 0           | 1          |
| AT3G11590 | 1           | 1           | 0           | 1          |
| AT3G11670 | 0           | 1           | 1           | 1          |
| AT3G11673 | 0           | 0           | 1           | 1          |
| AT3G11680 | 0           | 1           | 0           | 1          |
| AT3G11690 | 0           | 1           | 0           | 1          |
| AT3G11700 | 0           | 1           | 1           | 1          |
| AT3G11750 | 0           | 1           | 0           | 1          |
| AT3G11760 | 0           | 1           | 0           | 1          |
| AT3G11770 | 0           | 1           | 0           | 1          |
| AT3G11773 | 0           | 1           | 0           | 1          |
| AT3G11890 | 0           | 1           | 0           | 1          |
| AT3G11900 | 0           | 1           | 0           | 1          |
| AT3G11910 | 1           | 0           | 0           | 1          |
| AT3G11920 | 1           | 0           | 0           | 1          |
| AT3G12120 | 1           | 0           | 0           | 1          |
| AT3G12150 | 0           | 1           | 0           | 1          |
| AT3G12160 | 0           | 1           | 0           | 1          |
| AT3G12280 | 0           | 1           | 0           | 1          |
| AT3G12290 | 0           | 1           | 0           | 1          |
| AT3G12300 | 0           | 1           | 0           | 1          |
| AT3G12320 | 0           | 1           | 0           | 1          |
| AT3G12560 | 0           | 1           | 1           | 1          |
| AT3G12570 | 0           | 1           | 1           | 1          |
| AT3G12590 | 1           | 1           | 1           | 1          |
| AT3G12600 | 1           | 1           | 1           | 1          |
| AT3G12610 | 0           | 1           | 0           | 1          |
| AT3G12620 | 0           | 1           | 0           | 1          |
| AT3G12630 | 0           | 1           | 0           | 1          |
| AT3G12670 | 0           | 1           | 0           | 1          |
| AT3G12680 | 0           | 1           | 0           | 1          |
| AT3G12700 | 0           | 1           | 0           | 1          |
| AT3G12710 | 0           | 1           | 0           | 1          |
| AT3G12720 | 0           | 1           | 0           | 1          |
| AT3G12820 | 0           | 1           | 0           | 1          |
| AT3G12830 | 0           | 1           | 0           | 1          |
| AT3G12835 | 0           | 1           | 0           | 1          |
| AT3G12840 | 0           | 1           | 0           | 1          |
| AT3G12915 | 0           | 1           | 0           | 1          |
| AT3G12920 | 1           | 1           | 1           | 1          |
| AT3G12930 | 1           | 1           | 0           | 1          |
| AT3G12965 | 0           | 1           | 0           | 1          |
| AT3G12970 | 0           | 1           | 0           | 1          |
| AT3G13310 | 0           | 1           | 0           | 1          |
| AT3G13320 | 0           | 1           | 0           | 1          |
| AT3G13360 | 1           | 1           | 0           | 1          |

Appendix Table S4

| Name      | PIF3_target | PIF4_target | PIF5_target | PIF_target |
|-----------|-------------|-------------|-------------|------------|
| AT3G13370 | 1           | 1           | 0           | 1          |
| AT3G13405 | 0           | 1           | 0           | 1          |
| AT3G13410 | 0           | 1           | 0           | 1          |
| AT3G13500 | 0           | 1           | 0           | 1          |
| AT3G13510 | 0           | 1           | 0           | 1          |
| AT3G13520 | 0           | 1           | 0           | 1          |
| AT3G13525 | 0           | 1           | 1           | 1          |
| AT3G13682 | 0           | 1           | 0           | 1          |
| AT3G13686 | 0           | 1           | 0           | 1          |
| AT3G13720 | 0           | 1           | 0           | 1          |
| AT3G13724 | 0           | 1           | 0           | 1          |
| AT3G13740 | 0           | 1           | 0           | 1          |
| AT3G13750 | 0           | 1           | 0           | 1          |
| AT3G13784 | 0           | 1           | 0           | 1          |
| AT3G13790 | 0           | 1           | 0           | 1          |
| AT3G13800 | 0           | 1           | 0           | 1          |
| AT3G13810 | 1           | 1           | 0           | 1          |
| AT3G13820 | 0           | 1           | 0           | 1          |
| AT3G13860 | 0           | 1           | 0           | 1          |
| AT3G13960 | 0           | 1           | 0           | 1          |
| AT3G13970 | 0           | 1           | 1           | 1          |
| AT3G13980 | 0           | 1           | 0           | 1          |
| AT3G13990 | 0           | 1           | 0           | 1          |
| AT3G14010 | 0           | 1           | 0           | 1          |
| AT3G14020 | 0           | 1           | 0           | 1          |
| AT3G14050 | 0           | 1           | 1           | 1          |
| AT3G14060 | 0           | 1           | 0           | 1          |
| AT3G14067 | 0           | 1           | 0           | 1          |
| AT3G14070 | 0           | 1           | 0           | 1          |
| AT3G14205 | 1           | 1           | 1           | 1          |
| AT3G14210 | 0           | 1           | 0           | 1          |
| AT3G14350 | 0           | 1           | 0           | 1          |
| AT3G14360 | 0           | 1           | 1           | 1          |
| AT3G14370 | 1           | 1           | 0           | 1          |
| AT3G14380 | 0           | 1           | 0           | 1          |
| AT3G14431 | 0           | 0           | 1           | 1          |
| AT3G14440 | 1           | 1           | 0           | 1          |
| AT3G14450 | 1           | 1           | 0           | 1          |
| AT3G14550 | 0           | 1           | 0           | 1          |
| AT3G14560 | 0           | 1           | 0           | 1          |
| AT3G14590 | 1           | 0           | 1           | 1          |
| AT3G14595 | 1           | 0           | 1           | 1          |
| AT3G14640 | 0           | 1           | 1           | 1          |
| AT3G14650 | 0           | 1           | 1           | 1          |
| AT3G14750 | 0           | 1           | 0           | 1          |
| AT3G14760 | 0           | 1           | 0           | 1          |
| AT3G14830 | 0           | 1           | 0           | 1          |
| AT3G14840 | 0           | 1           | 0           | 1          |
| AT3G14850 | 0           | 1           | 0           | 1          |
| AT3G14880 | 0           | 1           | 0           | 1          |
| AT3G14890 | 0           | 1           | 0           | 1          |



Appendix Table S4

| Name      | PIF3_target | PIF4_target | PIF5_target | PIF_target |
|-----------|-------------|-------------|-------------|------------|
| AT3G14980 | 0           | 1           | 0           | 1          |
| AT3G14990 | 0           | 1           | 0           | 1          |
| AT3G15020 | 0           | 1           | 0           | 1          |
| AT3G15030 | 0           | 1           | 0           | 1          |
| AT3G15090 | 0           | 1           | 0           | 1          |
| AT3G15095 | 0           | 1           | 0           | 1          |
| AT3G15115 | 0           | 1           | 0           | 1          |
| AT3G15120 | 0           | 1           | 0           | 1          |
| AT3G15200 | 1           | 1           | 1           | 1          |
| AT3G15210 | 1           | 1           | 1           | 1          |
| AT3G15220 | 0           | 1           | 0           | 1          |
| AT3G15340 | 0           | 1           | 0           | 1          |
| AT3G15350 | 0           | 1           | 0           | 1          |
| AT3G15351 | 0           | 0           | 1           | 1          |
| AT3G15356 | 0           | 0           | 1           | 1          |
| AT3G15470 | 0           | 1           | 0           | 1          |
| AT3G15480 | 0           | 1           | 0           | 1          |
| AT3G15490 | 0           | 1           | 0           | 1          |
| AT3G15500 | 0           | 1           | 0           | 1          |
| AT3G15510 | 1           | 1           | 0           | 1          |
| AT3G15520 | 0           | 1           | 0           | 1          |
| AT3G15530 | 0           | 1           | 0           | 1          |
| AT3G15534 | 0           | 1           | 0           | 1          |
| AT3G15536 | 0           | 1           | 0           | 1          |
| AT3G15540 | 1           | 1           | 1           | 1          |
| AT3G15548 | 0           | 1           | 0           | 1          |
| AT3G15570 | 0           | 1           | 1           | 1          |
| AT3G15578 | 0           | 1           | 1           | 1          |
| AT3G15630 | 0           | 1           | 0           | 1          |
| AT3G15640 | 0           | 1           | 0           | 1          |
| AT3G15720 | 0           | 1           | 0           | 1          |
| AT3G15730 | 0           | 1           | 0           | 1          |
| AT3G15760 | 0           | 1           | 0           | 1          |
| AT3G15770 | 0           | 1           | 1           | 1          |
| AT3G16000 | 0           | 1           | 0           | 1          |
| AT3G16010 | 0           | 1           | 0           | 1          |
| AT3G16050 | 0           | 1           | 0           | 1          |
| AT3G16060 | 0           | 1           | 0           | 1          |
| AT3G16110 | 0           | 1           | 0           | 1          |
| AT3G16117 | 0           | 1           | 0           | 1          |
| AT3G16180 | 0           | 1           | 0           | 1          |
| AT3G16190 | 0           | 1           | 0           | 1          |
| AT3G16230 | 0           | 1           | 0           | 1          |
| AT3G16240 | 0           | 1           | 1           | 1          |
| AT3G16400 | 0           | 1           | 0           | 1          |
| AT3G16410 | 0           | 1           | 0           | 1          |
| AT3G16470 | 0           | 0           | 1           | 1          |
| AT3G16480 | 0           | 0           | 1           | 1          |
| AT3G16570 | 0           | 1           | 0           | 1          |
| AT3G16580 | 0           | 1           | 0           | 1          |
| AT3G16620 | 0           | 1           | 1           | 1          |

Appendix Table S4

| Name      | PIF3_target | PIF4_target | PIF5_target | PIF_target |
|-----------|-------------|-------------|-------------|------------|
| AT3G16630 | 0           | 1           | 1           | 1          |
| AT3G16690 | 0           | 1           | 0           | 1          |
| AT3G16785 | 0           | 1           | 1           | 1          |
| AT3G16800 | 0           | 1           | 1           | 1          |
| AT3G16820 | 0           | 1           | 0           | 1          |
| AT3G16830 | 0           | 1           | 0           | 1          |
| AT3G16840 | 1           | 1           | 0           | 1          |
| AT3G16850 | 1           | 1           | 1           | 1          |
| AT3G16851 | 0           | 1           | 0           | 1          |
| AT3G16857 | 0           | 1           | 0           | 1          |
| AT3G16860 | 0           | 1           | 1           | 1          |
| AT3G16870 | 0           | 1           | 1           | 1          |
| AT3G17080 | 0           | 1           | 0           | 1          |
| AT3G17090 | 0           | 1           | 0           | 1          |
| AT3G17100 | 1           | 1           | 0           | 1          |
| AT3G17110 | 1           | 0           | 1           | 1          |
| AT3G17120 | 0           | 1           | 1           | 1          |
| AT3G17130 | 0           | 1           | 0           | 1          |
| AT3G17180 | 0           | 1           | 0           | 1          |
| AT3G17185 | 0           | 1           | 0           | 1          |
| AT3G17390 | 0           | 1           | 0           | 1          |
| AT3G17400 | 0           | 1           | 0           | 1          |
| AT3G17510 | 1           | 1           | 1           | 1          |
| AT3G17520 | 0           | 1           | 0           | 1          |
| AT3G17570 | 0           | 1           | 0           | 1          |
| AT3G17580 | 1           | 1           | 0           | 1          |
| AT3G17800 | 0           | 1           | 1           | 1          |
| AT3G17810 | 0           | 1           | 1           | 1          |
| AT3G17820 | 0           | 1           | 0           | 1          |
| AT3G17830 | 0           | 1           | 0           | 1          |
| AT3G17840 | 0           | 1           | 0           | 1          |
| AT3G17845 | 0           | 1           | 0           | 1          |
| AT3G17850 | 1           | 1           | 0           | 1          |
| AT3G17860 | 1           | 1           | 1           | 1          |
| AT3G17980 | 0           | 1           | 0           | 1          |
| AT3G17998 | 0           | 1           | 0           | 1          |
| AT3G18010 | 0           | 1           | 0           | 1          |
| AT3G18020 | 0           | 1           | 0           | 1          |
| AT3G18035 | 0           | 1           | 0           | 1          |
| AT3G18040 | 0           | 1           | 0           | 1          |
| AT3G18050 | 0           | 1           | 1           | 1          |
| AT3G18060 | 0           | 1           | 1           | 1          |
| AT3G18070 | 0           | 1           | 0           | 1          |
| AT3G18080 | 0           | 1           | 1           | 1          |
| AT3G18170 | 0           | 1           | 0           | 1          |
| AT3G18250 | 1           | 0           | 0           | 1          |
| AT3G18485 | 1           | 1           | 1           | 1          |
| AT3G18490 | 0           | 1           | 0           | 1          |
| AT3G18518 | 0           | 0           | 1           | 1          |
| AT3G18535 | 0           | 1           | 0           | 1          |
| AT3G18540 | 0           | 1           | 0           | 1          |

Appendix Table S4

| Name      | PIF3_target | PIF4_target | PIF5_target | PIF_target |
|-----------|-------------|-------------|-------------|------------|
| AT3G18710 | 1           | 1           | 1           | 1          |
| AT3G18715 | 0           | 1           | 0           | 1          |
| AT3G18750 | 1           | 0           | 0           | 1          |
| AT3G18773 | 0           | 1           | 0           | 1          |
| AT3G18779 | 0           | 1           | 0           | 1          |
| AT3G18780 | 1           | 1           | 1           | 1          |
| AT3G18830 | 1           | 1           | 1           | 1          |
| AT3G18840 | 1           | 1           | 0           | 1          |
| AT3G19170 | 0           | 1           | 0           | 1          |
| AT3G19180 | 0           | 1           | 0           | 1          |
| AT3G19200 | 0           | 1           | 0           | 1          |
| AT3G19210 | 0           | 1           | 0           | 1          |
| AT3G19270 | 0           | 0           | 1           | 1          |
| AT3G19274 | 0           | 1           | 1           | 1          |
| AT3G19380 | 1           | 1           | 0           | 1          |
| AT3G19390 | 1           | 1           | 1           | 1          |
| AT3G19530 | 0           | 1           | 1           | 1          |
| AT3G19540 | 0           | 1           | 0           | 1          |
| AT3G19550 | 0           | 1           | 0           | 1          |
| AT3G19553 | 0           | 1           | 1           | 1          |
| AT3G19560 | 0           | 1           | 1           | 1          |
| AT3G19580 | 1           | 1           | 0           | 1          |
| AT3G19590 | 1           | 1           | 0           | 1          |
| AT3G19670 | 0           | 1           | 0           | 1          |
| AT3G19680 | 0           | 1           | 0           | 1          |
| AT3G19690 | 0           | 1           | 0           | 1          |
| AT3G19820 | 1           | 1           | 1           | 1          |
| AT3G19830 | 0           | 1           | 0           | 1          |
| AT3G19850 | 0           | 0           | 1           | 1          |
| AT3G19860 | 0           | 0           | 1           | 1          |
| AT3G19960 | 0           | 1           | 0           | 1          |
| AT3G19970 | 0           | 1           | 0           | 1          |
| AT3G20015 | 0           | 1           | 0           | 1          |
| AT3G20250 | 1           | 1           | 1           | 1          |
| AT3G20260 | 0           | 1           | 1           | 1          |
| AT3G20300 | 1           | 1           | 0           | 1          |
| AT3G20310 | 0           | 1           | 0           | 1          |
| AT3G20340 | 1           | 1           | 0           | 1          |
| AT3G20350 | 1           | 1           | 0           | 1          |
| AT3G20550 | 0           | 1           | 0           | 1          |
| AT3G20555 | 0           | 1           | 0           | 1          |
| AT3G20640 | 1           | 1           | 0           | 1          |
| AT3G20650 | 0           | 1           | 0           | 1          |
| AT3G20770 | 0           | 1           | 1           | 1          |
| AT3G20810 | 0           | 1           | 0           | 1          |
| AT3G20820 | 1           | 1           | 0           | 1          |
| AT3G20830 | 0           | 1           | 0           | 1          |
| AT3G20900 | 1           | 0           | 0           | 1          |
| AT3G20910 | 1           | 0           | 0           | 1          |
| AT3G21150 | 0           | 1           | 0           | 1          |
| AT3G21260 | 0           | 1           | 0           | 1          |

Appendix Table S4

| Name      | PIF3_target | PIF4_target | PIF5_target | PIF_target |
|-----------|-------------|-------------|-------------|------------|
| AT3G21270 | 0           | 1           | 0           | 1          |
| AT3G21320 | 1           | 1           | 1           | 1          |
| AT3G21330 | 1           | 1           | 0           | 1          |
| AT3G21550 | 0           | 1           | 0           | 1          |
| AT3G21560 | 0           | 1           | 0           | 1          |
| AT3G21700 | 1           | 0           | 0           | 1          |
| AT3G22072 | 0           | 1           | 1           | 1          |
| AT3G22080 | 0           | 1           | 0           | 1          |
| AT3G22380 | 0           | 1           | 0           | 1          |
| AT3G22400 | 0           | 1           | 0           | 1          |
| AT3G22410 | 0           | 1           | 1           | 1          |
| AT3G22415 | 0           | 1           | 0           | 1          |
| AT3G22436 | 0           | 1           | 0           | 1          |
| AT3G22440 | 0           | 1           | 0           | 1          |
| AT3G22540 | 0           | 1           | 0           | 1          |
| AT3G22550 | 0           | 1           | 0           | 1          |
| AT3G22830 | 0           | 0           | 1           | 1          |
| AT3G22840 | 0           | 1           | 0           | 1          |
| AT3G22845 | 0           | 1           | 0           | 1          |
| AT3G22880 | 0           | 1           | 0           | 1          |
| AT3G22886 | 0           | 1           | 0           | 1          |
| AT3G22968 | 0           | 1           | 0           | 1          |
| AT3G22980 | 0           | 1           | 0           | 1          |
| AT3G23010 | 0           | 1           | 0           | 1          |
| AT3G23020 | 0           | 1           | 0           | 1          |
| AT3G23030 | 1           | 1           | 1           | 1          |
| AT3G23040 | 1           | 1           | 0           | 1          |
| AT3G23050 | 1           | 1           | 1           | 1          |
| AT3G23060 | 1           | 1           | 0           | 1          |
| AT3G23080 | 0           | 1           | 0           | 1          |
| AT3G23090 | 0           | 1           | 0           | 1          |
| AT3G23230 | 1           | 0           | 1           | 1          |
| AT3G23480 | 0           | 0           | 1           | 1          |
| AT3G23637 | 1           | 1           | 1           | 1          |
| AT3G23640 | 1           | 1           | 1           | 1          |
| AT3G23690 | 0           | 1           | 0           | 1          |
| AT3G23700 | 0           | 1           | 0           | 1          |
| AT3G23727 | 0           | 1           | 0           | 1          |
| AT3G23730 | 0           | 1           | 0           | 1          |
| AT3G23810 | 0           | 1           | 0           | 1          |
| AT3G23820 | 1           | 1           | 1           | 1          |
| AT3G23880 | 1           | 1           | 0           | 1          |
| AT3G23890 | 1           | 1           | 0           | 1          |
| AT3G23910 | 1           | 1           | 1           | 1          |
| AT3G23920 | 1           | 1           | 1           | 1          |
| AT3G23930 | 1           | 1           | 0           | 1          |
| AT3G24040 | 0           | 1           | 0           | 1          |
| AT3G24050 | 0           | 1           | 1           | 1          |
| AT3G24090 | 0           | 1           | 0           | 1          |
| AT3G24093 | 0           | 1           | 0           | 1          |
| AT3G24120 | 0           | 1           | 0           | 1          |

Appendix Table S4

| Name      | PIF3_target | PIF4_target | PIF5_target | PIF_target |
|-----------|-------------|-------------|-------------|------------|
| AT3G24460 | 0           | 1           | 0           | 1          |
| AT3G24503 | 1           | 1           | 1           | 1          |
| AT3G24506 | 0           | 1           | 0           | 1          |
| AT3G24517 | 0           | 0           | 1           | 1          |
| AT3G24518 | 0           | 0           | 1           | 1          |
| AT3G24520 | 0           | 1           | 1           | 1          |
| AT3G24530 | 0           | 1           | 0           | 1          |
| AT3G24542 | 0           | 1           | 0           | 1          |
| AT3G24550 | 0           | 1           | 1           | 1          |
| AT3G24710 | 0           | 1           | 0           | 1          |
| AT3G24715 | 0           | 1           | 0           | 1          |
| AT3G24840 | 1           | 0           | 0           | 1          |
| AT3G24900 | 0           | 1           | 0           | 1          |
| AT3G24929 | 0           | 1           | 0           | 1          |
| AT3G25020 | 0           | 1           | 0           | 1          |
| AT3G25030 | 0           | 1           | 0           | 1          |
| AT3G25400 | 0           | 0           | 1           | 1          |
| AT3G25590 | 1           | 0           | 0           | 1          |
| AT3G25700 | 0           | 1           | 0           | 1          |
| AT3G25710 | 0           | 1           | 0           | 1          |
| AT3G25715 | 0           | 1           | 1           | 1          |
| AT3G25716 | 0           | 1           | 1           | 1          |
| AT3G25717 | 0           | 1           | 1           | 1          |
| AT3G25719 | 0           | 1           | 0           | 1          |
| AT3G25727 | 1           | 1           | 0           | 1          |
| AT3G25730 | 1           | 1           | 0           | 1          |
| AT3G26170 | 0           | 1           | 0           | 1          |
| AT3G26180 | 0           | 1           | 0           | 1          |
| AT3G26210 | 1           | 1           | 1           | 1          |
| AT3G26220 | 0           | 1           | 1           | 1          |
| AT3G26511 | 1           | 1           | 1           | 1          |
| AT3G26520 | 0           | 1           | 0           | 1          |
| AT3G26530 | 1           | 0           | 1           | 1          |
| AT3G26539 | 0           | 1           | 0           | 1          |
| AT3G26750 | 0           | 1           | 0           | 1          |
| AT3G26760 | 0           | 1           | 0           | 1          |
| AT3G26800 | 0           | 1           | 0           | 1          |
| AT3G26810 | 0           | 1           | 0           | 1          |
| AT3G26900 | 0           | 1           | 0           | 1          |
| AT3G26932 | 0           | 1           | 0           | 1          |
| AT3G26934 | 0           | 1           | 0           | 1          |
| AT3G27060 | 0           | 1           | 0           | 1          |
| AT3G27070 | 0           | 1           | 0           | 1          |
| AT3G27160 | 0           | 1           | 0           | 1          |
| AT3G27170 | 0           | 1           | 1           | 1          |
| AT3G27210 | 1           | 0           | 0           | 1          |
| AT3G27350 | 0           | 1           | 0           | 1          |
| AT3G27360 | 0           | 1           | 0           | 1          |
| AT3G27580 | 0           | 0           | 1           | 1          |
| AT3G27590 | 0           | 1           | 1           | 1          |
| AT3G27670 | 0           | 1           | 0           | 1          |

Appendix Table S4

| Name      | PIF3_target | PIF4_target | PIF5_target | PIF_target |
|-----------|-------------|-------------|-------------|------------|
| AT3G27680 | 0           | 1           | 0           | 1          |
| AT3G27690 | 0           | 1           | 0           | 1          |
| AT3G27770 | 0           | 1           | 0           | 1          |
| AT3G27785 | 0           | 1           | 0           | 1          |
| AT3G27800 | 0           | 0           | 1           | 1          |
| AT3G27960 | 1           | 1           | 1           | 1          |
| AT3G27968 | 0           | 1           | 0           | 1          |
| AT3G28030 | 0           | 1           | 0           | 1          |
| AT3G28040 | 0           | 1           | 0           | 1          |
| AT3G28170 | 0           | 1           | 0           | 1          |
| AT3G28180 | 0           | 1           | 0           | 1          |
| AT3G28193 | 0           | 0           | 1           | 1          |
| AT3G28200 | 0           | 0           | 1           | 1          |
| AT3G28340 | 0           | 1           | 0           | 1          |
| AT3G28345 | 0           | 1           | 0           | 1          |
| AT3G28650 | 0           | 1           | 0           | 1          |
| AT3G28660 | 0           | 1           | 0           | 1          |
| AT3G28857 | 0           | 1           | 0           | 1          |
| AT3G28860 | 0           | 1           | 0           | 1          |
| AT3G28870 | 0           | 1           | 0           | 1          |
| AT3G28900 | 0           | 1           | 0           | 1          |
| AT3G28910 | 0           | 1           | 0           | 1          |
| AT3G28918 | 0           | 1           | 0           | 1          |
| AT3G28920 | 0           | 1           | 0           | 1          |
| AT3G28958 | 0           | 1           | 0           | 1          |
| AT3G29240 | 0           | 1           | 0           | 1          |
| AT3G29310 | 0           | 1           | 0           | 1          |
| AT3G29320 | 0           | 1           | 0           | 1          |
| AT3G29360 | 0           | 1           | 0           | 1          |
| AT3G29370 | 1           | 1           | 0           | 1          |
| AT3G29575 | 1           | 1           | 1           | 1          |
| AT3G29580 | 0           | 1           | 0           | 1          |
| AT3G29644 | 0           | 1           | 0           | 1          |
| AT3G29670 | 0           | 1           | 0           | 1          |
| AT3G30160 | 0           | 1           | 1           | 1          |
| AT3G30180 | 0           | 1           | 0           | 1          |
| AT3G30340 | 0           | 1           | 0           | 1          |
| AT3G30775 | 1           | 1           | 1           | 1          |
| AT3G30778 | 0           | 1           | 0           | 1          |
| AT3G41768 | 0           | 0           | 1           | 1          |
| AT3G41979 | 0           | 0           | 1           | 1          |
| AT3G43190 | 0           | 1           | 0           | 1          |
| AT3G43210 | 0           | 1           | 0           | 1          |
| AT3G43270 | 0           | 1           | 0           | 1          |
| AT3G43280 | 0           | 1           | 0           | 1          |
| AT3G43431 | 1           | 1           | 1           | 1          |
| AT3G43432 | 0           | 1           | 0           | 1          |
| AT3G43540 | 0           | 1           | 0           | 1          |
| AT3G43550 | 0           | 1           | 0           | 1          |
| AT3G43960 | 0           | 1           | 0           | 1          |
| AT3G43970 | 0           | 1           | 0           | 1          |

Appendix Table S4

| Name      | PIF3_target | PIF4_target | PIF5_target | PIF_target |
|-----------|-------------|-------------|-------------|------------|
| AT3G44190 | 0           | 1           | 0           | 1          |
| AT3G44200 | 0           | 1           | 0           | 1          |
| AT3G44260 | 0           | 1           | 0           | 1          |
| AT3G44261 | 0           | 1           | 0           | 1          |
| AT3G44300 | 0           | 1           | 1           | 1          |
| AT3G44310 | 1           | 1           | 1           | 1          |
| AT3G44550 | 0           | 0           | 1           | 1          |
| AT3G44600 | 0           | 1           | 0           | 1          |
| AT3G44610 | 0           | 1           | 1           | 1          |
| AT3G44735 | 0           | 1           | 0           | 1          |
| AT3G44740 | 0           | 1           | 0           | 1          |
| AT3G45220 | 1           | 0           | 0           | 1          |
| AT3G45230 | 1           | 0           | 0           | 1          |
| AT3G45300 | 0           | 1           | 0           | 1          |
| AT3G45310 | 0           | 1           | 0           | 1          |
| AT3G45600 | 1           | 1           | 0           | 1          |
| AT3G45610 | 0           | 1           | 0           | 1          |
| AT3G45620 | 0           | 1           | 0           | 1          |
| AT3G45638 | 0           | 1           | 0           | 1          |
| AT3G45640 | 0           | 1           | 0           | 1          |
| AT3G45650 | 0           | 1           | 0           | 1          |
| AT3G45720 | 0           | 1           | 0           | 1          |
| AT3G45730 | 0           | 1           | 0           | 1          |
| AT3G45770 | 0           | 1           | 0           | 1          |
| AT3G45775 | 1           | 0           | 1           | 1          |
| AT3G45780 | 1           | 1           | 1           | 1          |
| AT3G45850 | 0           | 0           | 1           | 1          |
| AT3G45851 | 0           | 1           | 0           | 1          |
| AT3G45860 | 0           | 1           | 0           | 1          |
| AT3G45965 | 0           | 1           | 0           | 1          |
| AT3G45970 | 0           | 1           | 0           | 1          |
| AT3G46450 | 0           | 1           | 0           | 1          |
| AT3G46460 | 0           | 1           | 0           | 1          |
| AT3G46540 | 0           | 1           | 0           | 1          |
| AT3G46550 | 0           | 1           | 0           | 1          |
| AT3G46560 | 0           | 1           | 0           | 1          |
| AT3G46590 | 0           | 1           | 1           | 1          |
| AT3G46600 | 0           | 1           | 0           | 1          |
| AT3G46610 | 0           | 0           | 1           | 1          |
| AT3G46613 | 0           | 0           | 1           | 1          |
| AT3G46616 | 0           | 1           | 0           | 1          |
| AT3G46620 | 1           | 1           | 0           | 1          |
| AT3G46630 | 0           | 1           | 0           | 1          |
| AT3G46640 | 0           | 1           | 0           | 1          |
| AT3G46700 | 1           | 0           | 0           | 1          |
| AT3G46830 | 0           | 1           | 0           | 1          |
| AT3G46840 | 0           | 1           | 0           | 1          |
| AT3G47010 | 0           | 1           | 0           | 1          |
| AT3G47220 | 0           | 1           | 0           | 1          |
| AT3G47240 | 0           | 0           | 1           | 1          |
| AT3G47250 | 0           | 1           | 0           | 1          |

Appendix Table S4

| Name      | PIF3_target | PIF4_target | PIF5_target | PIF_target |
|-----------|-------------|-------------|-------------|------------|
| AT3G47290 | 0           | 1           | 0           | 1          |
| AT3G47340 | 0           | 0           | 1           | 1          |
| AT3G47341 | 0           | 1           | 0           | 1          |
| AT3G47342 | 0           | 1           | 0           | 1          |
| AT3G47420 | 1           | 1           | 0           | 1          |
| AT3G47430 | 1           | 1           | 1           | 1          |
| AT3G47600 | 0           | 1           | 0           | 1          |
| AT3G47610 | 0           | 1           | 1           | 1          |
| AT3G47620 | 1           | 1           | 1           | 1          |
| AT3G47630 | 1           | 1           | 0           | 1          |
| AT3G47640 | 1           | 1           | 0           | 1          |
| AT3G47820 | 0           | 1           | 1           | 1          |
| AT3G47830 | 0           | 1           | 1           | 1          |
| AT3G47940 | 0           | 1           | 1           | 1          |
| AT3G47950 | 0           | 1           | 1           | 1          |
| AT3G48050 | 0           | 1           | 0           | 1          |
| AT3G48057 | 0           | 1           | 0           | 1          |
| AT3G48060 | 1           | 0           | 0           | 1          |
| AT3G48070 | 1           | 0           | 0           | 1          |
| AT3G48260 | 1           | 1           | 0           | 1          |
| AT3G48270 | 1           | 1           | 0           | 1          |
| AT3G48275 | 0           | 1           | 0           | 1          |
| AT3G48330 | 0           | 1           | 0           | 1          |
| AT3G48360 | 0           | 0           | 1           | 1          |
| AT3G48520 | 0           | 1           | 0           | 1          |
| AT3G48550 | 0           | 1           | 0           | 1          |
| AT3G48560 | 0           | 1           | 0           | 1          |
| AT3G48690 | 0           | 1           | 0           | 1          |
| AT3G48700 | 0           | 1           | 0           | 1          |
| AT3G48780 | 0           | 1           | 1           | 1          |
| AT3G49120 | 1           | 0           | 0           | 1          |
| AT3G49210 | 0           | 1           | 0           | 1          |
| AT3G49220 | 0           | 1           | 0           | 1          |
| AT3G49350 | 0           | 1           | 0           | 1          |
| AT3G49360 | 0           | 1           | 0           | 1          |
| AT3G49530 | 0           | 1           | 0           | 1          |
| AT3G49540 | 0           | 1           | 0           | 1          |
| AT3G49570 | 0           | 1           | 0           | 1          |
| AT3G49580 | 0           | 1           | 0           | 1          |
| AT3G49670 | 0           | 1           | 1           | 1          |
| AT3G49680 | 0           | 1           | 1           | 1          |
| AT3G49690 | 0           | 1           | 0           | 1          |
| AT3G49700 | 0           | 1           | 0           | 1          |
| AT3G49780 | 0           | 1           | 0           | 1          |
| AT3G49790 | 0           | 1           | 0           | 1          |
| AT3G49810 | 1           | 1           | 0           | 1          |
| AT3G49820 | 1           | 1           | 0           | 1          |
| AT3G49870 | 0           | 1           | 0           | 1          |
| AT3G49880 | 0           | 1           | 0           | 1          |
| AT3G49930 | 0           | 1           | 0           | 1          |
| AT3G49940 | 0           | 1           | 0           | 1          |



Appendix Table S4

| Name      | PIF3_target | PIF4_target | PIF5_target | PIF_target |
|-----------|-------------|-------------|-------------|------------|
| AT3G49950 | 1           | 1           | 0           | 1          |
| AT3G50060 | 1           | 0           | 0           | 1          |
| AT3G50240 | 0           | 1           | 1           | 1          |
| AT3G50250 | 0           | 1           | 0           | 1          |
| AT3G50310 | 0           | 1           | 0           | 1          |
| AT3G50330 | 0           | 1           | 0           | 1          |
| AT3G50337 | 0           | 1           | 0           | 1          |
| AT3G50340 | 0           | 1           | 0           | 1          |
| AT3G50350 | 0           | 1           | 0           | 1          |
| AT3G50390 | 0           | 0           | 1           | 1          |
| AT3G50400 | 0           | 0           | 1           | 1          |
| AT3G50440 | 0           | 1           | 0           | 1          |
| AT3G50450 | 0           | 1           | 0           | 1          |
| AT3G50620 | 0           | 1           | 0           | 1          |
| AT3G50630 | 0           | 1           | 1           | 1          |
| AT3G50660 | 1           | 1           | 1           | 1          |
| AT3G50665 | 1           | 1           | 0           | 1          |
| AT3G50730 | 0           | 0           | 1           | 1          |
| AT3G50740 | 0           | 1           | 1           | 1          |
| AT3G50750 | 0           | 1           | 1           | 1          |
| AT3G50751 | 0           | 1           | 1           | 1          |
| AT3G50780 | 0           | 1           | 0           | 1          |
| AT3G50790 | 0           | 1           | 0           | 1          |
| AT3G50800 | 1           | 1           | 0           | 1          |
| AT3G50808 | 0           | 1           | 0           | 1          |
| AT3G50870 | 0           | 0           | 1           | 1          |
| AT3G50880 | 0           | 1           | 0           | 1          |
| AT3G50890 | 0           | 1           | 0           | 1          |
| AT3G50895 | 0           | 0           | 1           | 1          |
| AT3G50900 | 0           | 0           | 1           | 1          |
| AT3G51050 | 0           | 1           | 0           | 1          |
| AT3G51057 | 0           | 1           | 0           | 1          |
| AT3G51140 | 0           | 1           | 0           | 1          |
| AT3G51200 | 0           | 0           | 1           | 1          |
| AT3G51210 | 0           | 0           | 1           | 1          |
| AT3G51360 | 0           | 1           | 1           | 1          |
| AT3G51370 | 0           | 1           | 1           | 1          |
| AT3G51400 | 0           | 1           | 0           | 1          |
| AT3G51410 | 0           | 1           | 0           | 1          |
| AT3G51420 | 0           | 1           | 0           | 1          |
| AT3G51550 | 0           | 1           | 0           | 1          |
| AT3G51560 | 0           | 1           | 0           | 1          |
| AT3G51660 | 1           | 1           | 1           | 1          |
| AT3G51670 | 1           | 1           | 1           | 1          |
| AT3G51770 | 0           | 1           | 0           | 1          |
| AT3G51780 | 0           | 1           | 0           | 1          |
| AT3G51890 | 0           | 1           | 0           | 1          |
| AT3G51895 | 0           | 1           | 0           | 1          |
| AT3G51910 | 0           | 1           | 0           | 1          |
| AT3G51940 | 0           | 1           | 1           | 1          |
| AT3G51950 | 0           | 1           | 0           | 1          |

Appendix Table S4

| Name      | PIF3_target | PIF4_target | PIF5_target | PIF_target |
|-----------|-------------|-------------|-------------|------------|
| AT3G51960 | 0           | 1           | 0           | 1          |
| AT3G52060 | 0           | 1           | 0           | 1          |
| AT3G52100 | 0           | 1           | 0           | 1          |
| AT3G52105 | 0           | 1           | 0           | 1          |
| AT3G52285 | 0           | 1           | 0           | 1          |
| AT3G52290 | 0           | 1           | 0           | 1          |
| AT3G52450 | 0           | 0           | 1           | 1          |
| AT3G52460 | 0           | 1           | 0           | 1          |
| AT3G52470 | 0           | 1           | 1           | 1          |
| AT3G52500 | 0           | 0           | 1           | 1          |
| AT3G52510 | 0           | 0           | 1           | 1          |
| AT3G52520 | 0           | 0           | 1           | 1          |
| AT3G52700 | 0           | 1           | 0           | 1          |
| AT3G52710 | 0           | 1           | 0           | 1          |
| AT3G52840 | 0           | 1           | 0           | 1          |
| AT3G52870 | 0           | 1           | 1           | 1          |
| AT3G52880 | 0           | 1           | 0           | 1          |
| AT3G52890 | 0           | 1           | 0           | 1          |
| AT3G52910 | 0           | 1           | 0           | 1          |
| AT3G52920 | 0           | 1           | 0           | 1          |
| AT3G52930 | 0           | 1           | 0           | 1          |
| AT3G52940 | 0           | 0           | 1           | 1          |
| AT3G52941 | 0           | 0           | 1           | 1          |
| AT3G53170 | 0           | 1           | 1           | 1          |
| AT3G53180 | 0           | 1           | 1           | 1          |
| AT3G53200 | 0           | 1           | 0           | 1          |
| AT3G53210 | 0           | 1           | 0           | 1          |
| AT3G53230 | 0           | 1           | 0           | 1          |
| AT3G53232 | 0           | 1           | 0           | 1          |
| AT3G53240 | 0           | 1           | 0           | 1          |
| AT3G53250 | 0           | 1           | 0           | 1          |
| AT3G53380 | 1           | 1           | 1           | 1          |
| AT3G53390 | 1           | 1           | 1           | 1          |
| AT3G53420 | 0           | 1           | 1           | 1          |
| AT3G53430 | 0           | 1           | 0           | 1          |
| AT3G53450 | 0           | 1           | 0           | 1          |
| AT3G53460 | 0           | 1           | 0           | 1          |
| AT3G53540 | 0           | 1           | 0           | 1          |
| AT3G53550 | 0           | 1           | 0           | 1          |
| AT3G53668 | 1           | 0           | 0           | 1          |
| AT3G53670 | 1           | 0           | 0           | 1          |
| AT3G53790 | 0           | 1           | 0           | 1          |
| AT3G53800 | 0           | 1           | 0           | 1          |
| AT3G53810 | 1           | 1           | 0           | 1          |
| AT3G53820 | 1           | 1           | 0           | 1          |
| AT3G53990 | 0           | 1           | 1           | 1          |
| AT3G54000 | 0           | 1           | 0           | 1          |
| AT3G54020 | 0           | 1           | 1           | 1          |
| AT3G54030 | 1           | 1           | 1           | 1          |
| AT3G54070 | 0           | 1           | 0           | 1          |
| AT3G54080 | 0           | 1           | 0           | 1          |

Appendix Table S4

| Name      | PIF3_target | PIF4_target | PIF5_target | PIF_target |
|-----------|-------------|-------------|-------------|------------|
| AT3G54190 | 1           | 1           | 1           | 1          |
| AT3G54200 | 1           | 1           | 1           | 1          |
| AT3G54290 | 0           | 1           | 0           | 1          |
| AT3G54300 | 0           | 1           | 0           | 1          |
| AT3G54320 | 0           | 1           | 0           | 1          |
| AT3G54400 | 0           | 1           | 0           | 1          |
| AT3G54410 | 0           | 1           | 0           | 1          |
| AT3G54440 | 0           | 1           | 0           | 1          |
| AT3G54450 | 0           | 1           | 0           | 1          |
| AT3G54500 | 1           | 1           | 0           | 1          |
| AT3G54510 | 1           | 1           | 0           | 1          |
| AT3G54770 | 0           | 1           | 0           | 1          |
| AT3G54802 | 0           | 0           | 1           | 1          |
| AT3G54804 | 1           | 1           | 1           | 1          |
| AT3G54810 | 1           | 1           | 1           | 1          |
| AT3G54910 | 0           | 0           | 1           | 1          |
| AT3G54920 | 0           | 1           | 1           | 1          |
| AT3G54940 | 0           | 1           | 0           | 1          |
| AT3G54950 | 0           | 1           | 0           | 1          |
| AT3G54960 | 1           | 1           | 0           | 1          |
| AT3G54970 | 0           | 1           | 0           | 1          |
| AT3G54990 | 0           | 1           | 1           | 1          |
| AT3G55000 | 0           | 1           | 1           | 1          |
| AT3G55240 | 1           | 1           | 1           | 1          |
| AT3G55250 | 1           | 1           | 0           | 1          |
| AT3G55430 | 0           | 1           | 1           | 1          |
| AT3G55440 | 0           | 1           | 1           | 1          |
| AT3G55610 | 1           | 1           | 0           | 1          |
| AT3G55620 | 1           | 1           | 0           | 1          |
| AT3G55730 | 0           | 1           | 1           | 1          |
| AT3G55734 | 0           | 1           | 0           | 1          |
| AT3G55840 | 0           | 1           | 1           | 1          |
| AT3G55850 | 0           | 1           | 1           | 1          |
| AT3G55980 | 0           | 0           | 1           | 1          |
| AT3G56050 | 0           | 1           | 0           | 1          |
| AT3G56060 | 0           | 1           | 0           | 1          |
| AT3G56080 | 0           | 1           | 0           | 1          |
| AT3G56085 | 0           | 1           | 0           | 1          |
| AT3G56270 | 0           | 1           | 0           | 1          |
| AT3G56275 | 1           | 0           | 0           | 1          |
| AT3G56290 | 0           | 1           | 0           | 1          |
| AT3G56350 | 0           | 1           | 0           | 1          |
| AT3G56360 | 0           | 1           | 0           | 1          |
| AT3G56810 | 0           | 1           | 0           | 1          |
| AT3G57030 | 0           | 1           | 0           | 1          |
| AT3G57040 | 0           | 1           | 0           | 1          |
| AT3G57060 | 0           | 1           | 0           | 1          |
| AT3G57062 | 0           | 1           | 0           | 1          |
| AT3G57540 | 0           | 1           | 1           | 1          |
| AT3G57550 | 0           | 1           | 1           | 1          |
| AT3G57560 | 0           | 1           | 0           | 1          |

Appendix Table S4

| Name      | PIF3_target | PIF4_target | PIF5_target | PIF_target |
|-----------|-------------|-------------|-------------|------------|
| AT3G57570 | 0           | 0           | 1           | 1          |
| AT3G57610 | 0           | 1           | 0           | 1          |
| AT3G57670 | 0           | 1           | 0           | 1          |
| AT3G57680 | 0           | 1           | 0           | 1          |
| AT3G57800 | 1           | 1           | 1           | 1          |
| AT3G57810 | 1           | 1           | 1           | 1          |
| AT3G57870 | 1           | 1           | 1           | 1          |
| AT3G57880 | 0           | 1           | 1           | 1          |
| AT3G57990 | 0           | 1           | 0           | 1          |
| AT3G58000 | 0           | 1           | 0           | 1          |
| AT3G58060 | 1           | 0           | 0           | 1          |
| AT3G58110 | 0           | 1           | 0           | 1          |
| AT3G58120 | 1           | 1           | 0           | 1          |
| AT3G58130 | 1           | 1           | 0           | 1          |
| AT3G58610 | 0           | 1           | 0           | 1          |
| AT3G58620 | 1           | 1           | 1           | 1          |
| AT3G58640 | 1           | 1           | 0           | 1          |
| AT3G58650 | 0           | 1           | 0           | 1          |
| AT3G58720 | 0           | 1           | 0           | 1          |
| AT3G58730 | 0           | 1           | 0           | 1          |
| AT3G58740 | 0           | 1           | 0           | 1          |
| AT3G58840 | 0           | 1           | 0           | 1          |
| AT3G58850 | 0           | 1           | 1           | 1          |
| AT3G58860 | 0           | 1           | 0           | 1          |
| AT3G59050 | 0           | 1           | 0           | 1          |
| AT3G59060 | 0           | 1           | 0           | 1          |
| AT3G59070 | 0           | 1           | 0           | 1          |
| AT3G59340 | 0           | 1           | 0           | 1          |
| AT3G59350 | 0           | 1           | 0           | 1          |
| AT3G59765 | 0           | 1           | 0           | 1          |
| AT3G59770 | 0           | 1           | 0           | 1          |
| AT3G59890 | 0           | 1           | 0           | 1          |
| AT3G59900 | 0           | 1           | 0           | 1          |
| AT3G59930 | 1           | 1           | 0           | 1          |
| AT3G59940 | 1           | 1           | 0           | 1          |
| AT3G59960 | 0           | 1           | 0           | 1          |
| AT3G59970 | 0           | 1           | 0           | 1          |
| AT3G60030 | 0           | 1           | 0           | 1          |
| AT3G60040 | 0           | 1           | 0           | 1          |
| AT3G60070 | 0           | 1           | 0           | 1          |
| AT3G60075 | 0           | 1           | 0           | 1          |
| AT3G60190 | 1           | 1           | 1           | 1          |
| AT3G60200 | 1           | 1           | 1           | 1          |
| AT3G60220 | 1           | 1           | 0           | 1          |
| AT3G60238 | 0           | 1           | 0           | 1          |
| AT3G60310 | 0           | 1           | 1           | 1          |
| AT3G60318 | 0           | 1           | 1           | 1          |
| AT3G60380 | 0           | 1           | 0           | 1          |
| AT3G60390 | 1           | 1           | 0           | 1          |
| AT3G60400 | 1           | 1           | 1           | 1          |
| AT3G60520 | 0           | 1           | 0           | 1          |

Appendix Table S4

| Name      | PIF3_target | PIF4_target | PIF5_target | PIF_target |
|-----------|-------------|-------------|-------------|------------|
| AT3G60530 | 0           | 1           | 0           | 1          |
| AT3G60640 | 0           | 1           | 0           | 1          |
| AT3G60647 | 0           | 1           | 0           | 1          |
| AT3G60690 | 1           | 0           | 0           | 1          |
| AT3G60750 | 0           | 1           | 0           | 1          |
| AT3G60760 | 0           | 1           | 0           | 1          |
| AT3G61150 | 0           | 1           | 1           | 1          |
| AT3G61182 | 0           | 1           | 0           | 1          |
| AT3G61190 | 0           | 1           | 0           | 1          |
| AT3G61198 | 0           | 1           | 0           | 1          |
| AT3G61200 | 0           | 1           | 0           | 1          |
| AT3G61260 | 0           | 1           | 0           | 1          |
| AT3G61270 | 0           | 1           | 0           | 1          |
| AT3G61420 | 0           | 1           | 0           | 1          |
| AT3G61430 | 0           | 1           | 0           | 1          |
| AT3G61460 | 1           | 1           | 1           | 1          |
| AT3G61470 | 1           | 1           | 1           | 1          |
| AT3G61580 | 0           | 1           | 0           | 1          |
| AT3G61590 | 0           | 1           | 0           | 1          |
| AT3G61620 | 0           | 1           | 0           | 1          |
| AT3G61630 | 0           | 1           | 0           | 1          |
| AT3G61640 | 1           | 1           | 1           | 1          |
| AT3G61650 | 0           | 1           | 0           | 1          |
| AT3G61678 | 0           | 1           | 0           | 1          |
| AT3G61680 | 0           | 1           | 0           | 1          |
| AT3G61690 | 0           | 1           | 0           | 1          |
| AT3G61700 | 0           | 1           | 1           | 1          |
| AT3G61750 | 0           | 1           | 0           | 1          |
| AT3G61755 | 0           | 1           | 0           | 1          |
| AT3G61810 | 0           | 1           | 0           | 1          |
| AT3G61820 | 0           | 1           | 0           | 1          |
| AT3G61826 | 0           | 1           | 1           | 1          |
| AT3G61827 | 0           | 1           | 1           | 1          |
| AT3G61830 | 1           | 0           | 0           | 1          |
| AT3G61840 | 0           | 1           | 0           | 1          |
| AT3G61850 | 0           | 1           | 0           | 1          |
| AT3G61860 | 0           | 1           | 0           | 1          |
| AT3G61870 | 0           | 1           | 0           | 1          |
| AT3G61880 | 0           | 1           | 0           | 1          |
| AT3G61890 | 0           | 1           | 1           | 1          |
| AT3G61897 | 0           | 1           | 0           | 1          |
| AT3G61910 | 0           | 1           | 0           | 1          |
| AT3G61920 | 0           | 1           | 0           | 1          |
| AT3G61930 | 0           | 1           | 0           | 1          |
| AT3G61960 | 1           | 1           | 1           | 1          |
| AT3G61962 | 0           | 1           | 0           | 1          |
| AT3G61970 | 0           | 1           | 0           | 1          |
| AT3G61980 | 0           | 1           | 0           | 1          |
| AT3G61990 | 0           | 1           | 0           | 1          |
| AT3G62090 | 1           | 1           | 1           | 1          |
| AT3G62097 | 0           | 1           | 0           | 1          |

Appendix Table S4

| Name      | PIF3_target | PIF4_target | PIF5_target | PIF_target |
|-----------|-------------|-------------|-------------|------------|
| AT3G62100 | 1           | 0           | 0           | 1          |
| AT3G62110 | 0           | 1           | 0           | 1          |
| AT3G62560 | 0           | 1           | 0           | 1          |
| AT3G62570 | 0           | 1           | 0           | 1          |
| AT3G62580 | 0           | 1           | 0           | 1          |
| AT3G62610 | 0           | 1           | 0           | 1          |
| AT3G62620 | 0           | 1           | 1           | 1          |
| AT3G62630 | 1           | 1           | 1           | 1          |
| AT3G62640 | 1           | 1           | 1           | 1          |
| AT3G62650 | 1           | 1           | 1           | 1          |
| AT3G62660 | 0           | 1           | 0           | 1          |
| AT3G62670 | 0           | 1           | 0           | 1          |
| AT3G62680 | 0           | 1           | 0           | 1          |
| AT3G62690 | 0           | 1           | 1           | 1          |
| AT3G62700 | 0           | 1           | 1           | 1          |
| AT3G62710 | 0           | 1           | 1           | 1          |
| AT3G62980 | 0           | 1           | 0           | 1          |
| AT3G62988 | 0           | 1           | 0           | 1          |
| AT3G63006 | 0           | 1           | 0           | 1          |
| AT3G63010 | 0           | 1           | 0           | 1          |
| AT3G63060 | 0           | 1           | 0           | 1          |
| AT3G63070 | 0           | 1           | 0           | 1          |
| AT3G63120 | 0           | 1           | 0           | 1          |
| AT3G63130 | 0           | 1           | 0           | 1          |
| AT3G63150 | 0           | 1           | 0           | 1          |
| AT3G63180 | 0           | 1           | 0           | 1          |
| AT3G63190 | 0           | 1           | 0           | 1          |
| AT3G63233 | 0           | 1           | 0           | 1          |
| AT3G63240 | 0           | 1           | 0           | 1          |
| AT3G63340 | 0           | 1           | 0           | 1          |
| AT3G63350 | 0           | 1           | 0           | 1          |
| AT3G63420 | 0           | 1           | 0           | 1          |
| AT3G63430 | 0           | 1           | 1           | 1          |
| AT3G63445 | 0           | 1           | 1           | 1          |
| AT3G63450 | 0           | 1           | 0           | 1          |
| AT3G63460 | 0           | 1           | 0           | 1          |
| AT3G63500 | 0           | 1           | 0           | 1          |
| AT3G63510 | 0           | 1           | 0           | 1          |
| AT4G00140 | 0           | 1           | 0           | 1          |
| AT4G00150 | 0           | 1           | 0           | 1          |
| AT4G00335 | 0           | 1           | 0           | 1          |
| AT4G00720 | 0           | 1           | 0           | 1          |
| AT4G00730 | 0           | 1           | 0           | 1          |
| AT4G00740 | 0           | 1           | 1           | 1          |
| AT4G00750 | 0           | 0           | 1           | 1          |
| AT4G00770 | 0           | 1           | 0           | 1          |
| AT4G00810 | 1           | 1           | 1           | 1          |
| AT4G00820 | 1           | 1           | 1           | 1          |
| AT4G00830 | 0           | 1           | 0           | 1          |
| AT4G01090 | 0           | 1           | 0           | 1          |
| AT4G01100 | 0           | 1           | 0           | 1          |

Appendix Table S4

| Name      | PIF3_target | PIF4_target | PIF5_target | PIF_target |
|-----------|-------------|-------------|-------------|------------|
| AT4G01245 | 1           | 1           | 1           | 1          |
| AT4G01250 | 1           | 1           | 1           | 1          |
| AT4G01328 | 0           | 1           | 1           | 1          |
| AT4G01330 | 0           | 1           | 1           | 1          |
| AT4G01335 | 0           | 1           | 0           | 1          |
| AT4G01340 | 0           | 0           | 1           | 1          |
| AT4G01400 | 0           | 1           | 1           | 1          |
| AT4G01410 | 0           | 1           | 1           | 1          |
| AT4G01510 | 0           | 1           | 0           | 1          |
| AT4G01680 | 0           | 1           | 0           | 1          |
| AT4G01690 | 0           | 1           | 0           | 1          |
| AT4G01710 | 0           | 1           | 0           | 1          |
| AT4G01720 | 0           | 1           | 0           | 1          |
| AT4G02055 | 0           | 1           | 0           | 1          |
| AT4G02060 | 0           | 1           | 0           | 1          |
| AT4G02075 | 0           | 1           | 0           | 1          |
| AT4G02090 | 0           | 1           | 0           | 1          |
| AT4G02100 | 0           | 1           | 0           | 1          |
| AT4G02110 | 0           | 1           | 0           | 1          |
| AT4G02130 | 0           | 1           | 0           | 1          |
| AT4G02140 | 0           | 1           | 0           | 1          |
| AT4G02290 | 0           | 1           | 0           | 1          |
| AT4G02300 | 0           | 1           | 0           | 1          |
| AT4G02380 | 0           | 1           | 0           | 1          |
| AT4G02390 | 0           | 1           | 0           | 1          |
| AT4G02500 | 0           | 1           | 0           | 1          |
| AT4G02510 | 0           | 1           | 0           | 1          |
| AT4G02530 | 0           | 1           | 0           | 1          |
| AT4G02540 | 0           | 1           | 0           | 1          |
| AT4G02710 | 0           | 1           | 0           | 1          |
| AT4G02715 | 0           | 1           | 0           | 1          |
| AT4G02780 | 0           | 1           | 0           | 1          |
| AT4G03000 | 0           | 1           | 0           | 1          |
| AT4G03010 | 1           | 1           | 1           | 1          |
| AT4G03030 | 0           | 1           | 0           | 1          |
| AT4G03038 | 0           | 1           | 0           | 1          |
| AT4G03113 | 0           | 1           | 0           | 1          |
| AT4G03115 | 0           | 1           | 0           | 1          |
| AT4G03190 | 0           | 1           | 1           | 1          |
| AT4G03200 | 0           | 1           | 1           | 1          |
| AT4G03205 | 0           | 1           | 0           | 1          |
| AT4G03210 | 0           | 1           | 0           | 1          |
| AT4G03270 | 0           | 1           | 0           | 1          |
| AT4G03280 | 0           | 1           | 1           | 1          |
| AT4G03320 | 0           | 1           | 0           | 1          |
| AT4G03330 | 0           | 1           | 0           | 1          |
| AT4G03390 | 1           | 1           | 1           | 1          |
| AT4G03400 | 0           | 1           | 0           | 1          |
| AT4G03410 | 0           | 1           | 0           | 1          |
| AT4G03415 | 0           | 1           | 0           | 1          |
| AT4G03420 | 0           | 1           | 0           | 1          |

Appendix Table S4

| Name      | PIF3_target | PIF4_target | PIF5_target | PIF_target |
|-----------|-------------|-------------|-------------|------------|
| AT4G03550 | 0           | 1           | 0           | 1          |
| AT4G03560 | 0           | 1           | 0           | 1          |
| AT4G03965 | 0           | 1           | 0           | 1          |
| AT4G04200 | 0           | 1           | 0           | 1          |
| AT4G04210 | 0           | 1           | 0           | 1          |
| AT4G04330 | 0           | 1           | 0           | 1          |
| AT4G04340 | 0           | 1           | 0           | 1          |
| AT4G04630 | 0           | 1           | 0           | 1          |
| AT4G04690 | 0           | 1           | 0           | 1          |
| AT4G04695 | 0           | 1           | 0           | 1          |
| AT4G05000 | 0           | 1           | 0           | 1          |
| AT4G05010 | 1           | 1           | 1           | 1          |
| AT4G05071 | 0           | 1           | 0           | 1          |
| AT4G05095 | 0           | 1           | 0           | 1          |
| AT4G05100 | 0           | 1           | 0           | 1          |
| AT4G05105 | 0           | 1           | 0           | 1          |
| AT4G05180 | 1           | 1           | 1           | 1          |
| AT4G05190 | 1           | 1           | 1           | 1          |
| AT4G06474 | 0           | 0           | 1           | 1          |
| AT4G06740 | 0           | 1           | 0           | 1          |
| AT4G06744 | 0           | 1           | 0           | 1          |
| AT4G08151 | 0           | 1           | 0           | 1          |
| AT4G08160 | 0           | 1           | 0           | 1          |
| AT4G08850 | 0           | 1           | 0           | 1          |
| AT4G08870 | 0           | 1           | 0           | 1          |
| AT4G08910 | 0           | 1           | 0           | 1          |
| AT4G08920 | 0           | 1           | 0           | 1          |
| AT4G08940 | 0           | 1           | 0           | 1          |
| AT4G08949 | 0           | 1           | 1           | 1          |
| AT4G08950 | 0           | 1           | 0           | 1          |
| AT4G08960 | 0           | 1           | 0           | 1          |
| AT4G09030 | 0           | 1           | 0           | 1          |
| AT4G09040 | 0           | 1           | 0           | 1          |
| AT4G09150 | 0           | 1           | 0           | 1          |
| AT4G09450 | 0           | 1           | 0           | 1          |
| AT4G09460 | 0           | 1           | 1           | 1          |
| AT4G09880 | 0           | 1           | 0           | 1          |
| AT4G09890 | 0           | 1           | 1           | 1          |
| AT4G10010 | 0           | 1           | 0           | 1          |
| AT4G10020 | 0           | 1           | 0           | 1          |
| AT4G10240 | 0           | 1           | 0           | 1          |
| AT4G10250 | 0           | 1           | 0           | 1          |
| AT4G10560 | 0           | 1           | 0           | 1          |
| AT4G10570 | 0           | 1           | 0           | 1          |
| AT4G11010 | 0           | 1           | 0           | 1          |
| AT4G11020 | 0           | 1           | 0           | 1          |
| AT4G11050 | 1           | 1           | 1           | 1          |
| AT4G11060 | 0           | 1           | 0           | 1          |
| AT4G11320 | 0           | 1           | 0           | 1          |
| AT4G11330 | 0           | 1           | 1           | 1          |
| AT4G11410 | 0           | 1           | 0           | 1          |



Appendix Table S4

| Name      | PIF3_target | PIF4_target | PIF5_target | PIF_target |
|-----------|-------------|-------------|-------------|------------|
| AT4G11540 | 0           | 1           | 0           | 1          |
| AT4G11550 | 0           | 1           | 0           | 1          |
| AT4G11560 | 0           | 1           | 0           | 1          |
| AT4G11600 | 1           | 0           | 0           | 1          |
| AT4G11610 | 0           | 1           | 0           | 1          |
| AT4G11630 | 0           | 1           | 0           | 1          |
| AT4G11820 | 0           | 1           | 0           | 1          |
| AT4G11830 | 0           | 1           | 0           | 1          |
| AT4G12120 | 1           | 1           | 0           | 1          |
| AT4G12130 | 1           | 1           | 0           | 1          |
| AT4G12410 | 0           | 1           | 0           | 1          |
| AT4G12420 | 0           | 1           | 0           | 1          |
| AT4G12430 | 1           | 1           | 1           | 1          |
| AT4G12432 | 1           | 0           | 1           | 1          |
| AT4G12440 | 0           | 1           | 0           | 1          |
| AT4G12720 | 0           | 1           | 0           | 1          |
| AT4G12730 | 0           | 1           | 0           | 1          |
| AT4G12731 | 0           | 1           | 0           | 1          |
| AT4G12970 | 0           | 0           | 1           | 1          |
| AT4G13350 | 0           | 1           | 0           | 1          |
| AT4G13395 | 0           | 1           | 1           | 1          |
| AT4G13400 | 0           | 1           | 1           | 1          |
| AT4G13530 | 0           | 1           | 1           | 1          |
| AT4G13540 | 0           | 1           | 1           | 1          |
| AT4G13790 | 0           | 1           | 1           | 1          |
| AT4G13800 | 0           | 1           | 0           | 1          |
| AT4G13930 | 0           | 1           | 0           | 1          |
| AT4G13940 | 0           | 1           | 0           | 1          |
| AT4G14040 | 0           | 1           | 0           | 1          |
| AT4G14130 | 1           | 1           | 1           | 1          |
| AT4G14140 | 0           | 1           | 0           | 1          |
| AT4G14150 | 0           | 1           | 0           | 1          |
| AT4G14160 | 0           | 1           | 0           | 1          |
| AT4G14310 | 0           | 1           | 0           | 1          |
| AT4G14315 | 0           | 1           | 0           | 1          |
| AT4G14420 | 0           | 1           | 0           | 1          |
| AT4G14430 | 0           | 1           | 0           | 1          |
| AT4G14465 | 0           | 1           | 1           | 1          |
| AT4G14470 | 1           | 0           | 0           | 1          |
| AT4G14480 | 0           | 1           | 0           | 1          |
| AT4G14490 | 0           | 1           | 0           | 1          |
| AT4G14500 | 0           | 1           | 0           | 1          |
| AT4G14550 | 0           | 1           | 0           | 1          |
| AT4G14560 | 1           | 1           | 0           | 1          |
| AT4G14615 | 0           | 1           | 0           | 1          |
| AT4G14620 | 0           | 1           | 0           | 1          |
| AT4G14680 | 0           | 1           | 1           | 1          |
| AT4G14690 | 0           | 1           | 1           | 1          |
| AT4G14720 | 0           | 1           | 0           | 1          |
| AT4G14723 | 0           | 1           | 0           | 1          |
| AT4G14730 | 0           | 1           | 0           | 1          |

Appendix Table S4

| Name      | PIF3_target | PIF4_target | PIF5_target | PIF_target |
|-----------|-------------|-------------|-------------|------------|
| AT4G14746 | 0           | 1           | 0           | 1          |
| AT4G14750 | 0           | 1           | 1           | 1          |
| AT4G14760 | 0           | 1           | 0           | 1          |
| AT4G14770 | 0           | 1           | 0           | 1          |
| AT4G14780 | 0           | 1           | 0           | 1          |
| AT4G14815 | 0           | 1           | 0           | 1          |
| AT4G14819 | 0           | 1           | 0           | 1          |
| AT4G14880 | 0           | 1           | 0           | 1          |
| AT4G14900 | 0           | 1           | 0           | 1          |
| AT4G14905 | 0           | 1           | 0           | 1          |
| AT4G14990 | 1           | 0           | 0           | 1          |
| AT4G15000 | 1           | 0           | 0           | 1          |
| AT4G15160 | 0           | 1           | 0           | 1          |
| AT4G15230 | 1           | 1           | 0           | 1          |
| AT4G15233 | 1           | 1           | 1           | 1          |
| AT4G15236 | 0           | 1           | 0           | 1          |
| AT4G15250 | 0           | 1           | 0           | 1          |
| AT4G15258 | 0           | 1           | 0           | 1          |
| AT4G15300 | 1           | 0           | 0           | 1          |
| AT4G15310 | 1           | 0           | 0           | 1          |
| AT4G15540 | 0           | 1           | 0           | 1          |
| AT4G15545 | 0           | 1           | 0           | 1          |
| AT4G15550 | 0           | 1           | 0           | 1          |
| AT4G15560 | 0           | 1           | 0           | 1          |
| AT4G15690 | 0           | 1           | 0           | 1          |
| AT4G15700 | 0           | 1           | 0           | 1          |
| AT4G15800 | 0           | 0           | 1           | 1          |
| AT4G16130 | 0           | 1           | 0           | 1          |
| AT4G16140 | 0           | 1           | 0           | 1          |
| AT4G16250 | 0           | 1           | 0           | 1          |
| AT4G16260 | 0           | 1           | 0           | 1          |
| AT4G16370 | 0           | 1           | 0           | 1          |
| AT4G16380 | 0           | 1           | 0           | 1          |
| AT4G16480 | 0           | 1           | 0           | 1          |
| AT4G16490 | 0           | 1           | 0           | 1          |
| AT4G16500 | 0           | 1           | 1           | 1          |
| AT4G16510 | 0           | 1           | 1           | 1          |
| AT4G16515 | 0           | 1           | 0           | 1          |
| AT4G16520 | 0           | 1           | 0           | 1          |
| AT4G16670 | 0           | 0           | 1           | 1          |
| AT4G16745 | 0           | 1           | 0           | 1          |
| AT4G16750 | 0           | 1           | 0           | 1          |
| AT4G16760 | 1           | 1           | 0           | 1          |
| AT4G16765 | 0           | 1           | 0           | 1          |
| AT4G16770 | 1           | 1           | 0           | 1          |
| AT4G16780 | 1           | 1           | 1           | 1          |
| AT4G16790 | 0           | 1           | 0           | 1          |
| AT4G16970 | 0           | 1           | 0           | 1          |
| AT4G16980 | 0           | 1           | 1           | 1          |
| AT4G16990 | 0           | 1           | 1           | 1          |
| AT4G17098 | 0           | 1           | 0           | 1          |

Appendix Table S4

| Name      | PIF3_target | PIF4_target | PIF5_target | PIF_target |
|-----------|-------------|-------------|-------------|------------|
| AT4G17230 | 0           | 1           | 0           | 1          |
| AT4G17240 | 0           | 1           | 0           | 1          |
| AT4G17245 | 0           | 1           | 0           | 1          |
| AT4G17280 | 0           | 1           | 1           | 1          |
| AT4G17300 | 0           | 1           | 1           | 1          |
| AT4G17420 | 1           | 1           | 1           | 1          |
| AT4G17430 | 0           | 1           | 1           | 1          |
| AT4G17440 | 0           | 1           | 0           | 1          |
| AT4G17450 | 1           | 0           | 1           | 1          |
| AT4G17453 | 0           | 1           | 1           | 1          |
| AT4G17460 | 1           | 1           | 1           | 1          |
| AT4G17500 | 0           | 0           | 1           | 1          |
| AT4G17615 | 0           | 1           | 0           | 1          |
| AT4G17670 | 0           | 1           | 0           | 1          |
| AT4G17680 | 0           | 1           | 0           | 1          |
| AT4G17695 | 0           | 1           | 0           | 1          |
| AT4G17700 | 0           | 1           | 0           | 1          |
| AT4G17800 | 0           | 1           | 0           | 1          |
| AT4G17810 | 1           | 1           | 0           | 1          |
| AT4G18020 | 0           | 1           | 0           | 1          |
| AT4G18060 | 0           | 1           | 0           | 1          |
| AT4G18070 | 0           | 1           | 0           | 1          |
| AT4G18140 | 1           | 0           | 0           | 1          |
| AT4G18150 | 1           | 0           | 0           | 1          |
| AT4G18230 | 1           | 1           | 0           | 1          |
| AT4G18240 | 1           | 1           | 0           | 1          |
| AT4G18540 | 0           | 0           | 1           | 1          |
| AT4G18550 | 0           | 1           | 0           | 1          |
| AT4G18620 | 0           | 1           | 0           | 1          |
| AT4G18630 | 1           | 1           | 1           | 1          |
| AT4G18660 | 0           | 1           | 1           | 1          |
| AT4G18670 | 0           | 1           | 1           | 1          |
| AT4G18692 | 0           | 1           | 0           | 1          |
| AT4G18700 | 0           | 1           | 1           | 1          |
| AT4G18710 | 0           | 1           | 1           | 1          |
| AT4G18800 | 0           | 1           | 0           | 1          |
| AT4G18810 | 0           | 1           | 0           | 1          |
| AT4G18815 | 0           | 1           | 1           | 1          |
| AT4G18820 | 0           | 1           | 1           | 1          |
| AT4G18880 | 1           | 1           | 1           | 1          |
| AT4G18890 | 1           | 1           | 1           | 1          |
| AT4G18940 | 0           | 1           | 0           | 1          |
| AT4G18950 | 0           | 1           | 0           | 1          |
| AT4G19040 | 1           | 1           | 0           | 1          |
| AT4G19045 | 0           | 1           | 0           | 1          |
| AT4G19110 | 0           | 1           | 1           | 1          |
| AT4G19112 | 0           | 0           | 1           | 1          |
| AT4G19120 | 0           | 1           | 0           | 1          |
| AT4G19130 | 0           | 1           | 0           | 1          |
| AT4G19140 | 0           | 1           | 0           | 1          |
| AT4G19170 | 0           | 1           | 1           | 1          |

Appendix Table S4

| Name      | PIF3_target | PIF4_target | PIF5_target | PIF_target |
|-----------|-------------|-------------|-------------|------------|
| AT4G19180 | 0           | 1           | 0           | 1          |
| AT4G19390 | 1           | 1           | 1           | 1          |
| AT4G19395 | 1           | 1           | 1           | 1          |
| AT4G19420 | 0           | 1           | 0           | 1          |
| AT4G19430 | 0           | 1           | 1           | 1          |
| AT4G19440 | 0           | 1           | 0           | 1          |
| AT4G19660 | 0           | 1           | 0           | 1          |
| AT4G19670 | 0           | 1           | 0           | 1          |
| AT4G19700 | 0           | 1           | 0           | 1          |
| AT4G19710 | 0           | 1           | 0           | 1          |
| AT4G19830 | 0           | 1           | 0           | 1          |
| AT4G19860 | 0           | 1           | 0           | 1          |
| AT4G19865 | 0           | 1           | 0           | 1          |
| AT4G20060 | 0           | 1           | 0           | 1          |
| AT4G20070 | 0           | 1           | 0           | 1          |
| AT4G20170 | 0           | 1           | 1           | 1          |
| AT4G20180 | 0           | 0           | 1           | 1          |
| AT4G20190 | 0           | 1           | 0           | 1          |
| AT4G20200 | 0           | 1           | 0           | 1          |
| AT4G20240 | 1           | 0           | 0           | 1          |
| AT4G20250 | 0           | 1           | 0           | 1          |
| AT4G20260 | 1           | 0           | 0           | 1          |
| AT4G20362 | 0           | 1           | 0           | 1          |
| AT4G20370 | 0           | 1           | 0           | 1          |
| AT4G20870 | 0           | 1           | 0           | 1          |
| AT4G20880 | 0           | 1           | 0           | 1          |
| AT4G21500 | 0           | 1           | 0           | 1          |
| AT4G21510 | 0           | 1           | 0           | 1          |
| AT4G21560 | 0           | 0           | 1           | 1          |
| AT4G21570 | 0           | 1           | 1           | 1          |
| AT4G21730 | 0           | 0           | 1           | 1          |
| AT4G21740 | 0           | 0           | 1           | 1          |
| AT4G21745 | 0           | 1           | 0           | 1          |
| AT4G21750 | 0           | 1           | 0           | 1          |
| AT4G21910 | 0           | 1           | 0           | 1          |
| AT4G21926 | 0           | 1           | 0           | 1          |
| AT4G22000 | 1           | 1           | 1           | 1          |
| AT4G22010 | 1           | 1           | 1           | 1          |
| AT4G22190 | 1           | 1           | 1           | 1          |
| AT4G22200 | 0           | 1           | 0           | 1          |
| AT4G22230 | 0           | 1           | 0           | 1          |
| AT4G22350 | 0           | 1           | 0           | 1          |
| AT4G22360 | 0           | 1           | 0           | 1          |
| AT4G22485 | 0           | 1           | 0           | 1          |
| AT4G22490 | 0           | 1           | 0           | 1          |
| AT4G22540 | 0           | 0           | 1           | 1          |
| AT4G22590 | 0           | 1           | 1           | 1          |
| AT4G22592 | 0           | 0           | 1           | 1          |
| AT4G22600 | 0           | 1           | 0           | 1          |
| AT4G22720 | 0           | 1           | 0           | 1          |
| AT4G22730 | 0           | 1           | 0           | 1          |

Appendix Table S4

| Name      | PIF3_target | PIF4_target | PIF5_target | PIF_target |
|-----------|-------------|-------------|-------------|------------|
| AT4G22780 | 0           | 1           | 0           | 1          |
| AT4G22785 | 0           | 1           | 0           | 1          |
| AT4G22800 | 0           | 1           | 0           | 1          |
| AT4G22810 | 0           | 1           | 0           | 1          |
| AT4G22820 | 0           | 1           | 0           | 1          |
| AT4G22980 | 0           | 0           | 1           | 1          |
| AT4G22990 | 0           | 0           | 1           | 1          |
| AT4G23050 | 0           | 1           | 0           | 1          |
| AT4G23060 | 1           | 1           | 0           | 1          |
| AT4G23100 | 0           | 0           | 1           | 1          |
| AT4G23103 | 0           | 1           | 1           | 1          |
| AT4G23250 | 0           | 1           | 0           | 1          |
| AT4G23260 | 0           | 1           | 0           | 1          |
| AT4G23432 | 0           | 1           | 1           | 1          |
| AT4G23440 | 1           | 1           | 0           | 1          |
| AT4G23500 | 0           | 1           | 0           | 1          |
| AT4G23630 | 0           | 1           | 0           | 1          |
| AT4G23713 | 0           | 1           | 0           | 1          |
| AT4G23720 | 0           | 1           | 0           | 1          |
| AT4G23730 | 0           | 1           | 0           | 1          |
| AT4G23820 | 0           | 1           | 1           | 1          |
| AT4G23860 | 0           | 1           | 0           | 1          |
| AT4G23870 | 0           | 1           | 1           | 1          |
| AT4G23970 | 0           | 1           | 0           | 1          |
| AT4G23980 | 0           | 1           | 0           | 1          |
| AT4G24030 | 0           | 0           | 1           | 1          |
| AT4G24040 | 0           | 0           | 1           | 1          |
| AT4G24050 | 0           | 1           | 0           | 1          |
| AT4G24060 | 0           | 1           | 1           | 1          |
| AT4G24080 | 0           | 1           | 0           | 1          |
| AT4G24110 | 0           | 0           | 1           | 1          |
| AT4G24120 | 0           | 0           | 1           | 1          |
| AT4G24150 | 0           | 1           | 0           | 1          |
| AT4G24231 | 0           | 1           | 0           | 1          |
| AT4G24240 | 1           | 1           | 0           | 1          |
| AT4G24270 | 0           | 1           | 0           | 1          |
| AT4G24275 | 0           | 1           | 0           | 1          |
| AT4G24660 | 0           | 1           | 1           | 1          |
| AT4G24670 | 0           | 1           | 0           | 1          |
| AT4G24760 | 0           | 1           | 0           | 1          |
| AT4G24770 | 0           | 1           | 0           | 1          |
| AT4G24970 | 0           | 1           | 0           | 1          |
| AT4G24972 | 0           | 1           | 0           | 1          |
| AT4G25020 | 0           | 1           | 0           | 1          |
| AT4G25030 | 0           | 1           | 0           | 1          |
| AT4G25070 | 0           | 1           | 0           | 1          |
| AT4G25080 | 0           | 1           | 0           | 1          |
| AT4G25100 | 0           | 1           | 0           | 1          |
| AT4G25260 | 0           | 1           | 1           | 1          |
| AT4G25270 | 0           | 1           | 1           | 1          |
| AT4G25280 | 0           | 1           | 0           | 1          |

Appendix Table S4

| Name      | PIF3_target | PIF4_target | PIF5_target | PIF_target |
|-----------|-------------|-------------|-------------|------------|
| AT4G25290 | 0           | 1           | 0           | 1          |
| AT4G25350 | 0           | 0           | 1           | 1          |
| AT4G25360 | 0           | 0           | 1           | 1          |
| AT4G25380 | 1           | 1           | 1           | 1          |
| AT4G25386 | 0           | 1           | 1           | 1          |
| AT4G25390 | 1           | 0           | 0           | 1          |
| AT4G25470 | 1           | 1           | 1           | 1          |
| AT4G25480 | 1           | 1           | 1           | 1          |
| AT4G25490 | 0           | 1           | 0           | 1          |
| AT4G25500 | 0           | 1           | 0           | 1          |
| AT4G25520 | 1           | 0           | 0           | 1          |
| AT4G25530 | 1           | 0           | 0           | 1          |
| AT4G25570 | 0           | 1           | 0           | 1          |
| AT4G25580 | 0           | 1           | 0           | 1          |
| AT4G25620 | 1           | 1           | 0           | 1          |
| AT4G25630 | 1           | 1           | 0           | 1          |
| AT4G25631 | 0           | 0           | 1           | 1          |
| AT4G25640 | 0           | 1           | 0           | 1          |
| AT4G25650 | 0           | 1           | 0           | 1          |
| AT4G25700 | 0           | 1           | 0           | 1          |
| AT4G25707 | 0           | 1           | 0           | 1          |
| AT4G25760 | 0           | 1           | 0           | 1          |
| AT4G25770 | 0           | 1           | 0           | 1          |
| AT4G25780 | 0           | 1           | 0           | 1          |
| AT4G25990 | 0           | 1           | 0           | 1          |
| AT4G26000 | 0           | 1           | 0           | 1          |
| AT4G26200 | 0           | 1           | 0           | 1          |
| AT4G26210 | 0           | 1           | 1           | 1          |
| AT4G26530 | 0           | 1           | 1           | 1          |
| AT4G26540 | 0           | 1           | 0           | 1          |
| AT4G26570 | 0           | 1           | 0           | 1          |
| AT4G26580 | 0           | 1           | 0           | 1          |
| AT4G26690 | 1           | 1           | 1           | 1          |
| AT4G26700 | 1           | 1           | 1           | 1          |
| AT4G26760 | 0           | 1           | 0           | 1          |
| AT4G26770 | 0           | 1           | 0           | 1          |
| AT4G26940 | 0           | 1           | 0           | 1          |
| AT4G26950 | 0           | 1           | 0           | 1          |
| AT4G27250 | 0           | 1           | 0           | 1          |
| AT4G27260 | 0           | 1           | 0           | 1          |
| AT4G27270 | 0           | 1           | 0           | 1          |
| AT4G27280 | 0           | 1           | 0           | 1          |
| AT4G27290 | 0           | 1           | 0           | 1          |
| AT4G27300 | 1           | 1           | 1           | 1          |
| AT4G27310 | 1           | 1           | 1           | 1          |
| AT4G27320 | 0           | 1           | 0           | 1          |
| AT4G27330 | 0           | 1           | 0           | 1          |
| AT4G27340 | 0           | 1           | 0           | 1          |
| AT4G27435 | 0           | 1           | 0           | 1          |
| AT4G27440 | 0           | 1           | 0           | 1          |
| AT4G27450 | 0           | 1           | 0           | 1          |

Appendix Table S4

| Name      | PIF3_target | PIF4_target | PIF5_target | PIF_target |
|-----------|-------------|-------------|-------------|------------|
| AT4G27460 | 0           | 1           | 0           | 1          |
| AT4G27490 | 0           | 1           | 0           | 1          |
| AT4G27500 | 0           | 1           | 0           | 1          |
| AT4G27510 | 0           | 1           | 1           | 1          |
| AT4G27520 | 0           | 1           | 0           | 1          |
| AT4G27654 | 0           | 1           | 0           | 1          |
| AT4G27657 | 0           | 1           | 0           | 1          |
| AT4G27660 | 0           | 0           | 1           | 1          |
| AT4G27710 | 0           | 1           | 0           | 1          |
| AT4G27720 | 0           | 1           | 0           | 1          |
| AT4G27730 | 0           | 1           | 0           | 1          |
| AT4G27740 | 0           | 1           | 0           | 1          |
| AT4G27860 | 0           | 1           | 0           | 1          |
| AT4G27870 | 0           | 1           | 0           | 1          |
| AT4G27950 | 1           | 1           | 1           | 1          |
| AT4G27960 | 0           | 1           | 0           | 1          |
| AT4G27970 | 0           | 1           | 0           | 1          |
| AT4G27980 | 0           | 1           | 0           | 1          |
| AT4G28080 | 0           | 0           | 1           | 1          |
| AT4G28085 | 0           | 0           | 1           | 1          |
| AT4G28150 | 0           | 1           | 0           | 1          |
| AT4G28240 | 0           | 1           | 1           | 1          |
| AT4G28250 | 0           | 1           | 0           | 1          |
| AT4G28260 | 0           | 1           | 0           | 1          |
| AT4G28270 | 0           | 1           | 0           | 1          |
| AT4G28290 | 0           | 1           | 1           | 1          |
| AT4G28300 | 0           | 1           | 1           | 1          |
| AT4G28330 | 0           | 1           | 0           | 1          |
| AT4G28340 | 0           | 1           | 0           | 1          |
| AT4G28530 | 0           | 1           | 0           | 1          |
| AT4G28630 | 1           | 1           | 1           | 1          |
| AT4G28640 | 1           | 1           | 1           | 1          |
| AT4G28650 | 1           | 1           | 0           | 1          |
| AT4G28660 | 1           | 1           | 0           | 1          |
| AT4G28700 | 0           | 1           | 0           | 1          |
| AT4G28703 | 0           | 1           | 1           | 1          |
| AT4G28710 | 0           | 1           | 0           | 1          |
| AT4G28720 | 1           | 1           | 1           | 1          |
| AT4G28730 | 0           | 1           | 0           | 1          |
| AT4G28750 | 0           | 1           | 0           | 1          |
| AT4G28760 | 0           | 1           | 0           | 1          |
| AT4G29080 | 0           | 1           | 0           | 1          |
| AT4G29090 | 1           | 1           | 1           | 1          |
| AT4G29130 | 1           | 1           | 0           | 1          |
| AT4G29140 | 0           | 1           | 0           | 1          |
| AT4G29150 | 1           | 1           | 0           | 1          |
| AT4G29190 | 0           | 1           | 0           | 1          |
| AT4G29200 | 0           | 1           | 0           | 1          |
| AT4G29220 | 1           | 0           | 0           | 1          |
| AT4G29230 | 1           | 0           | 0           | 1          |
| AT4G29270 | 0           | 1           | 0           | 1          |

Appendix Table S4

| Name      | PIF3_target | PIF4_target | PIF5_target | PIF_target |
|-----------|-------------|-------------|-------------|------------|
| AT4G29273 | 0           | 1           | 0           | 1          |
| AT4G29310 | 0           | 1           | 0           | 1          |
| AT4G29330 | 0           | 1           | 1           | 1          |
| AT4G29340 | 0           | 1           | 0           | 1          |
| AT4G29350 | 0           | 1           | 0           | 1          |
| AT4G29440 | 0           | 0           | 1           | 1          |
| AT4G29520 | 0           | 1           | 0           | 1          |
| AT4G29530 | 0           | 1           | 0           | 1          |
| AT4G29700 | 0           | 1           | 0           | 1          |
| AT4G29710 | 0           | 1           | 0           | 1          |
| AT4G29770 | 0           | 1           | 0           | 1          |
| AT4G29780 | 0           | 1           | 1           | 1          |
| AT4G29900 | 0           | 1           | 0           | 1          |
| AT4G29905 | 0           | 1           | 0           | 1          |
| AT4G29930 | 0           | 0           | 1           | 1          |
| AT4G29940 | 0           | 1           | 0           | 1          |
| AT4G29950 | 0           | 1           | 0           | 1          |
| AT4G30064 | 0           | 1           | 0           | 1          |
| AT4G30067 | 0           | 1           | 0           | 1          |
| AT4G30074 | 1           | 1           | 0           | 1          |
| AT4G30080 | 0           | 1           | 0           | 1          |
| AT4G30120 | 0           | 1           | 0           | 1          |
| AT4G30130 | 0           | 1           | 0           | 1          |
| AT4G30170 | 0           | 1           | 0           | 1          |
| AT4G30180 | 0           | 1           | 0           | 1          |
| AT4G30280 | 0           | 0           | 1           | 1          |
| AT4G30340 | 0           | 1           | 1           | 1          |
| AT4G30350 | 0           | 1           | 1           | 1          |
| AT4G30370 | 0           | 1           | 0           | 1          |
| AT4G30380 | 0           | 1           | 0           | 1          |
| AT4G30400 | 0           | 1           | 0           | 1          |
| AT4G30410 | 1           | 1           | 1           | 1          |
| AT4G30420 | 1           | 1           | 0           | 1          |
| AT4G30430 | 0           | 1           | 0           | 1          |
| AT4G30440 | 0           | 1           | 0           | 1          |
| AT4G30490 | 0           | 1           | 1           | 1          |
| AT4G30500 | 0           | 1           | 1           | 1          |
| AT4G30640 | 0           | 1           | 0           | 1          |
| AT4G30650 | 0           | 1           | 1           | 1          |
| AT4G30660 | 0           | 1           | 1           | 1          |
| AT4G30770 | 0           | 1           | 0           | 1          |
| AT4G30780 | 0           | 1           | 0           | 1          |
| AT4G30790 | 0           | 0           | 1           | 1          |
| AT4G30800 | 0           | 0           | 1           | 1          |
| AT4G31080 | 1           | 0           | 0           | 1          |
| AT4G31355 | 0           | 1           | 0           | 1          |
| AT4G31360 | 0           | 1           | 0           | 1          |
| AT4G31370 | 0           | 1           | 0           | 1          |
| AT4G31380 | 0           | 1           | 1           | 1          |
| AT4G31390 | 1           | 1           | 1           | 1          |
| AT4G31550 | 0           | 1           | 0           | 1          |



Appendix Table S4

| Name      | PIF3_target | PIF4_target | PIF5_target | PIF_target |
|-----------|-------------|-------------|-------------|------------|
| AT4G31590 | 0           | 1           | 0           | 1          |
| AT4G31600 | 0           | 1           | 0           | 1          |
| AT4G31820 | 0           | 0           | 1           | 1          |
| AT4G31877 | 0           | 1           | 0           | 1          |
| AT4G31880 | 0           | 1           | 0           | 1          |
| AT4G32010 | 0           | 1           | 0           | 1          |
| AT4G32020 | 1           | 1           | 1           | 1          |
| AT4G32030 | 0           | 1           | 1           | 1          |
| AT4G32070 | 0           | 1           | 0           | 1          |
| AT4G32080 | 0           | 1           | 0           | 1          |
| AT4G32272 | 1           | 1           | 1           | 1          |
| AT4G32280 | 1           | 1           | 1           | 1          |
| AT4G32290 | 0           | 1           | 0           | 1          |
| AT4G32295 | 0           | 1           | 0           | 1          |
| AT4G32410 | 0           | 1           | 0           | 1          |
| AT4G32420 | 0           | 1           | 0           | 1          |
| AT4G32475 | 0           | 1           | 0           | 1          |
| AT4G32480 | 1           | 1           | 1           | 1          |
| AT4G32790 | 0           | 1           | 0           | 1          |
| AT4G32800 | 0           | 1           | 1           | 1          |
| AT4G32810 | 0           | 1           | 0           | 1          |
| AT4G32870 | 0           | 1           | 0           | 1          |
| AT4G32880 | 0           | 1           | 0           | 1          |
| AT4G32890 | 0           | 1           | 0           | 1          |
| AT4G32900 | 0           | 1           | 0           | 1          |
| AT4G33040 | 0           | 1           | 0           | 1          |
| AT4G33050 | 0           | 1           | 0           | 1          |
| AT4G33060 | 0           | 1           | 0           | 1          |
| AT4G33240 | 0           | 1           | 1           | 1          |
| AT4G33250 | 0           | 1           | 1           | 1          |
| AT4G33430 | 0           | 1           | 0           | 1          |
| AT4G33440 | 0           | 1           | 0           | 1          |
| AT4G33467 | 0           | 1           | 0           | 1          |
| AT4G33470 | 0           | 1           | 0           | 1          |
| AT4G33490 | 0           | 0           | 1           | 1          |
| AT4G33560 | 0           | 1           | 0           | 1          |
| AT4G33565 | 0           | 1           | 0           | 1          |
| AT4G33700 | 0           | 1           | 0           | 1          |
| AT4G33990 | 1           | 1           | 1           | 1          |
| AT4G34000 | 1           | 1           | 1           | 1          |
| AT4G34131 | 0           | 1           | 1           | 1          |
| AT4G34135 | 0           | 1           | 1           | 1          |
| AT4G34220 | 0           | 1           | 0           | 1          |
| AT4G34230 | 0           | 1           | 1           | 1          |
| AT4G34240 | 0           | 1           | 1           | 1          |
| AT4G34310 | 0           | 1           | 0           | 1          |
| AT4G34320 | 0           | 1           | 0           | 1          |
| AT4G34410 | 0           | 0           | 1           | 1          |
| AT4G34520 | 0           | 1           | 0           | 1          |
| AT4G34530 | 1           | 1           | 0           | 1          |
| AT4G34540 | 1           | 0           | 0           | 1          |

Appendix Table S4

| Name      | PIF3_target | PIF4_target | PIF5_target | PIF_target |
|-----------|-------------|-------------|-------------|------------|
| AT4G34640 | 0           | 1           | 0           | 1          |
| AT4G34650 | 0           | 1           | 0           | 1          |
| AT4G34700 | 0           | 1           | 0           | 1          |
| AT4G34710 | 0           | 1           | 1           | 1          |
| AT4G34720 | 0           | 1           | 0           | 1          |
| AT4G34760 | 0           | 1           | 1           | 1          |
| AT4G34770 | 0           | 1           | 1           | 1          |
| AT4G34780 | 0           | 1           | 0           | 1          |
| AT4G34790 | 0           | 1           | 0           | 1          |
| AT4G34800 | 0           | 1           | 0           | 1          |
| AT4G34910 | 0           | 0           | 1           | 1          |
| AT4G34960 | 0           | 1           | 0           | 1          |
| AT4G34970 | 0           | 1           | 0           | 1          |
| AT4G34980 | 0           | 1           | 1           | 1          |
| AT4G35060 | 0           | 1           | 0           | 1          |
| AT4G35070 | 0           | 1           | 0           | 1          |
| AT4G35090 | 1           | 1           | 0           | 1          |
| AT4G35100 | 1           | 1           | 0           | 1          |
| AT4G35110 | 0           | 1           | 0           | 1          |
| AT4G35180 | 0           | 1           | 0           | 1          |
| AT4G35190 | 0           | 1           | 0           | 1          |
| AT4G35240 | 0           | 1           | 0           | 1          |
| AT4G35250 | 0           | 1           | 0           | 1          |
| AT4G35460 | 0           | 1           | 0           | 1          |
| AT4G35470 | 1           | 1           | 1           | 1          |
| AT4G35480 | 0           | 1           | 0           | 1          |
| AT4G35500 | 0           | 1           | 0           | 1          |
| AT4G35510 | 0           | 1           | 0           | 1          |
| AT4G35710 | 0           | 1           | 0           | 1          |
| AT4G35720 | 1           | 1           | 1           | 1          |
| AT4G35750 | 0           | 1           | 0           | 1          |
| AT4G35760 | 0           | 1           | 0           | 1          |
| AT4G35770 | 0           | 1           | 0           | 1          |
| AT4G35780 | 0           | 1           | 0           | 1          |
| AT4G35783 | 0           | 1           | 0           | 1          |
| AT4G35790 | 0           | 1           | 0           | 1          |
| AT4G35837 | 0           | 0           | 1           | 1          |
| AT4G35840 | 0           | 1           | 0           | 1          |
| AT4G35850 | 1           | 1           | 1           | 1          |
| AT4G36010 | 1           | 1           | 0           | 1          |
| AT4G36020 | 0           | 1           | 0           | 1          |
| AT4G36030 | 0           | 1           | 1           | 1          |
| AT4G36040 | 0           | 1           | 1           | 1          |
| AT4G36105 | 0           | 1           | 0           | 1          |
| AT4G36110 | 0           | 1           | 1           | 1          |
| AT4G36120 | 0           | 1           | 0           | 1          |
| AT4G36170 | 0           | 1           | 1           | 1          |
| AT4G36220 | 0           | 1           | 0           | 1          |
| AT4G36360 | 0           | 1           | 0           | 1          |
| AT4G36370 | 0           | 1           | 1           | 1          |
| AT4G36380 | 0           | 1           | 0           | 1          |

Appendix Table S4

| Name      | PIF3_target | PIF4_target | PIF5_target | PIF_target |
|-----------|-------------|-------------|-------------|------------|
| AT4G36470 | 0           | 0           | 1           | 1          |
| AT4G36480 | 0           | 0           | 1           | 1          |
| AT4G36530 | 1           | 1           | 1           | 1          |
| AT4G36540 | 1           | 1           | 1           | 1          |
| AT4G36620 | 0           | 1           | 0           | 1          |
| AT4G36630 | 0           | 1           | 0           | 1          |
| AT4G36670 | 1           | 0           | 0           | 1          |
| AT4G36700 | 0           | 1           | 0           | 1          |
| AT4G36710 | 0           | 1           | 0           | 1          |
| AT4G36730 | 1           | 0           | 0           | 1          |
| AT4G36740 | 1           | 0           | 0           | 1          |
| AT4G36770 | 1           | 1           | 1           | 1          |
| AT4G36780 | 1           | 1           | 1           | 1          |
| AT4G36790 | 1           | 1           | 0           | 1          |
| AT4G36860 | 1           | 1           | 1           | 1          |
| AT4G36870 | 0           | 1           | 0           | 1          |
| AT4G36880 | 1           | 0           | 0           | 1          |
| AT4G36910 | 0           | 1           | 0           | 1          |
| AT4G36920 | 0           | 1           | 0           | 1          |
| AT4G36925 | 0           | 1           | 0           | 1          |
| AT4G36930 | 0           | 1           | 0           | 1          |
| AT4G36970 | 0           | 1           | 0           | 1          |
| AT4G36980 | 0           | 1           | 0           | 1          |
| AT4G37070 | 0           | 1           | 1           | 1          |
| AT4G37080 | 0           | 1           | 0           | 1          |
| AT4G37235 | 0           | 1           | 0           | 1          |
| AT4G37240 | 0           | 1           | 0           | 1          |
| AT4G37250 | 1           | 1           | 0           | 1          |
| AT4G37260 | 0           | 1           | 0           | 1          |
| AT4G37380 | 0           | 1           | 0           | 1          |
| AT4G37390 | 1           | 1           | 1           | 1          |
| AT4G37420 | 0           | 1           | 0           | 1          |
| AT4G37470 | 1           | 1           | 0           | 1          |
| AT4G37480 | 1           | 1           | 0           | 1          |
| AT4G37540 | 1           | 1           | 1           | 1          |
| AT4G37550 | 1           | 1           | 1           | 1          |
| AT4G37560 | 0           | 1           | 0           | 1          |
| AT4G37580 | 0           | 1           | 0           | 1          |
| AT4G37590 | 0           | 1           | 0           | 1          |
| AT4G37608 | 0           | 1           | 0           | 1          |
| AT4G37740 | 0           | 1           | 0           | 1          |
| AT4G37750 | 0           | 1           | 0           | 1          |
| AT4G37760 | 0           | 1           | 0           | 1          |
| AT4G37770 | 0           | 1           | 0           | 1          |
| AT4G37780 | 0           | 1           | 0           | 1          |
| AT4G37790 | 1           | 1           | 0           | 1          |
| AT4G37800 | 0           | 1           | 0           | 1          |
| AT4G37810 | 0           | 1           | 0           | 1          |
| AT4G37820 | 0           | 1           | 0           | 1          |
| AT4G37840 | 0           | 1           | 1           | 1          |
| AT4G37850 | 0           | 1           | 0           | 1          |

Appendix Table S4

| Name      | PIF3_target | PIF4_target | PIF5_target | PIF_target |
|-----------|-------------|-------------|-------------|------------|
| AT4G37940 | 1           | 1           | 1           | 1          |
| AT4G37950 | 1           | 1           | 0           | 1          |
| AT4G37970 | 0           | 0           | 1           | 1          |
| AT4G37980 | 0           | 0           | 1           | 1          |
| AT4G38401 | 0           | 1           | 0           | 1          |
| AT4G38405 | 0           | 1           | 0           | 1          |
| AT4G38420 | 0           | 1           | 0           | 1          |
| AT4G38430 | 0           | 1           | 0           | 1          |
| AT4G38460 | 0           | 1           | 0           | 1          |
| AT4G38470 | 1           | 1           | 0           | 1          |
| AT4G38520 | 0           | 1           | 0           | 1          |
| AT4G38530 | 0           | 1           | 0           | 1          |
| AT4G38570 | 0           | 1           | 0           | 1          |
| AT4G38580 | 0           | 1           | 0           | 1          |
| AT4G38620 | 0           | 1           | 0           | 1          |
| AT4G38630 | 0           | 1           | 0           | 1          |
| AT4G38660 | 0           | 1           | 0           | 1          |
| AT4G38670 | 0           | 1           | 0           | 1          |
| AT4G38680 | 0           | 1           | 0           | 1          |
| AT4G38690 | 0           | 1           | 0           | 1          |
| AT4G38700 | 0           | 1           | 0           | 1          |
| AT4G38710 | 0           | 1           | 0           | 1          |
| AT4G38730 | 0           | 1           | 0           | 1          |
| AT4G38740 | 0           | 1           | 0           | 1          |
| AT4G38750 | 0           | 1           | 0           | 1          |
| AT4G38810 | 0           | 1           | 0           | 1          |
| AT4G38825 | 0           | 1           | 0           | 1          |
| AT4G38840 | 0           | 1           | 1           | 1          |
| AT4G38850 | 0           | 1           | 1           | 1          |
| AT4G38860 | 1           | 1           | 1           | 1          |
| AT4G39040 | 0           | 1           | 0           | 1          |
| AT4G39050 | 0           | 1           | 0           | 1          |
| AT4G39070 | 0           | 1           | 0           | 1          |
| AT4G39080 | 0           | 1           | 0           | 1          |
| AT4G39090 | 0           | 1           | 0           | 1          |
| AT4G39100 | 0           | 1           | 0           | 1          |
| AT4G39140 | 0           | 1           | 0           | 1          |
| AT4G39150 | 0           | 1           | 0           | 1          |
| AT4G39200 | 0           | 1           | 0           | 1          |
| AT4G39210 | 0           | 1           | 0           | 1          |
| AT4G39345 | 0           | 1           | 0           | 1          |
| AT4G39350 | 0           | 1           | 1           | 1          |
| AT4G39360 | 0           | 1           | 0           | 1          |
| AT4G39390 | 0           | 1           | 0           | 1          |
| AT4G39400 | 1           | 1           | 0           | 1          |
| AT4G39403 | 0           | 1           | 1           | 1          |
| AT4G39404 | 1           | 1           | 1           | 1          |
| AT4G39410 | 0           | 1           | 0           | 1          |
| AT4G39520 | 0           | 1           | 0           | 1          |
| AT4G39630 | 1           | 0           | 1           | 1          |
| AT4G39640 | 1           | 0           | 1           | 1          |

Appendix Table S4

| Name      | PIF3_target | PIF4_target | PIF5_target | PIF_target |
|-----------|-------------|-------------|-------------|------------|
| AT4G39760 | 0           | 1           | 0           | 1          |
| AT4G39770 | 1           | 1           | 0           | 1          |
| AT4G39780 | 0           | 1           | 0           | 1          |
| AT4G39790 | 0           | 1           | 0           | 1          |
| AT4G39795 | 0           | 1           | 0           | 1          |
| AT4G39800 | 0           | 1           | 0           | 1          |
| AT4G39810 | 0           | 1           | 0           | 1          |
| AT4G39830 | 0           | 1           | 0           | 1          |
| AT4G39840 | 0           | 1           | 0           | 1          |
| AT4G39850 | 0           | 1           | 0           | 1          |
| AT4G40011 | 0           | 1           | 0           | 1          |
| AT4G40020 | 0           | 1           | 0           | 1          |
| AT4G40040 | 0           | 1           | 0           | 1          |
| AT4G40042 | 0           | 1           | 0           | 1          |
| AT4G40050 | 0           | 1           | 0           | 1          |
| AT4G40060 | 0           | 1           | 0           | 1          |
| AT5G01070 | 0           | 1           | 0           | 1          |
| AT5G01075 | 0           | 1           | 0           | 1          |
| AT5G01230 | 0           | 1           | 0           | 1          |
| AT5G01240 | 0           | 1           | 0           | 1          |
| AT5G01250 | 0           | 1           | 0           | 1          |
| AT5G01260 | 0           | 1           | 0           | 1          |
| AT5G01380 | 1           | 1           | 1           | 1          |
| AT5G01390 | 0           | 1           | 0           | 1          |
| AT5G01445 | 0           | 1           | 0           | 1          |
| AT5G01510 | 0           | 1           | 0           | 1          |
| AT5G01520 | 0           | 1           | 0           | 1          |
| AT5G01560 | 0           | 1           | 0           | 1          |
| AT5G01570 | 0           | 1           | 0           | 1          |
| AT5G01595 | 0           | 1           | 0           | 1          |
| AT5G01600 | 0           | 1           | 0           | 1          |
| AT5G01710 | 0           | 0           | 1           | 1          |
| AT5G01712 | 0           | 0           | 1           | 1          |
| AT5G01715 | 0           | 0           | 1           | 1          |
| AT5G01720 | 0           | 1           | 0           | 1          |
| AT5G01734 | 0           | 1           | 1           | 1          |
| AT5G01740 | 0           | 1           | 1           | 1          |
| AT5G01747 | 0           | 1           | 0           | 1          |
| AT5G01750 | 0           | 1           | 0           | 1          |
| AT5G01760 | 0           | 1           | 0           | 1          |
| AT5G01790 | 0           | 1           | 0           | 1          |
| AT5G01800 | 0           | 1           | 0           | 1          |
| AT5G01810 | 0           | 1           | 0           | 1          |
| AT5G01820 | 0           | 1           | 0           | 1          |
| AT5G01849 | 0           | 1           | 0           | 1          |
| AT5G01850 | 0           | 1           | 0           | 1          |
| AT5G01880 | 0           | 1           | 0           | 1          |
| AT5G01950 | 0           | 0           | 1           | 1          |
| AT5G02021 | 0           | 1           | 0           | 1          |
| AT5G02025 | 0           | 1           | 0           | 1          |
| AT5G02180 | 0           | 1           | 0           | 1          |

Appendix Table S4

| Name      | PIF3_target | PIF4_target | PIF5_target | PIF_target |
|-----------|-------------|-------------|-------------|------------|
| AT5G02190 | 0           | 1           | 1           | 1          |
| AT5G02200 | 0           | 1           | 1           | 1          |
| AT5G02230 | 0           | 1           | 0           | 1          |
| AT5G02240 | 0           | 1           | 0           | 1          |
| AT5G02250 | 0           | 1           | 0           | 1          |
| AT5G02260 | 0           | 1           | 1           | 1          |
| AT5G02450 | 0           | 1           | 0           | 1          |
| AT5G02460 | 0           | 1           | 0           | 1          |
| AT5G02500 | 0           | 1           | 0           | 1          |
| AT5G02502 | 0           | 1           | 0           | 1          |
| AT5G02530 | 1           | 1           | 1           | 1          |
| AT5G02540 | 1           | 1           | 1           | 1          |
| AT5G02550 | 0           | 1           | 0           | 1          |
| AT5G02570 | 1           | 1           | 1           | 1          |
| AT5G02580 | 1           | 1           | 1           | 1          |
| AT5G02590 | 1           | 1           | 1           | 1          |
| AT5G02640 | 0           | 1           | 0           | 1          |
| AT5G02650 | 0           | 1           | 0           | 1          |
| AT5G02730 | 0           | 1           | 0           | 1          |
| AT5G02740 | 0           | 1           | 0           | 1          |
| AT5G02750 | 0           | 1           | 0           | 1          |
| AT5G02760 | 0           | 1           | 1           | 1          |
| AT5G03040 | 0           | 1           | 1           | 1          |
| AT5G03050 | 0           | 1           | 0           | 1          |
| AT5G03110 | 0           | 1           | 0           | 1          |
| AT5G03120 | 0           | 1           | 0           | 1          |
| AT5G03140 | 1           | 1           | 1           | 1          |
| AT5G03150 | 0           | 1           | 1           | 1          |
| AT5G03180 | 0           | 1           | 0           | 1          |
| AT5G03190 | 0           | 1           | 0           | 1          |
| AT5G03210 | 1           | 1           | 0           | 1          |
| AT5G03220 | 0           | 1           | 1           | 1          |
| AT5G03230 | 0           | 0           | 1           | 1          |
| AT5G03270 | 0           | 1           | 0           | 1          |
| AT5G03280 | 0           | 1           | 0           | 1          |
| AT5G03310 | 0           | 1           | 0           | 1          |
| AT5G03320 | 0           | 1           | 0           | 1          |
| AT5G03330 | 1           | 0           | 1           | 1          |
| AT5G03350 | 0           | 1           | 0           | 1          |
| AT5G03360 | 0           | 1           | 0           | 1          |
| AT5G03370 | 0           | 1           | 1           | 1          |
| AT5G03380 | 0           | 1           | 0           | 1          |
| AT5G03490 | 0           | 1           | 0           | 1          |
| AT5G03510 | 0           | 1           | 0           | 1          |
| AT5G03520 | 0           | 1           | 1           | 1          |
| AT5G03660 | 0           | 1           | 0           | 1          |
| AT5G03668 | 0           | 1           | 0           | 1          |
| AT5G03700 | 0           | 1           | 0           | 1          |
| AT5G03705 | 0           | 1           | 0           | 1          |
| AT5G03720 | 0           | 1           | 0           | 1          |
| AT5G03730 | 0           | 1           | 0           | 1          |

Appendix Table S4

| Name      | PIF3_target | PIF4_target | PIF5_target | PIF_target |
|-----------|-------------|-------------|-------------|------------|
| AT5G03740 | 0           | 1           | 0           | 1          |
| AT5G03760 | 0           | 1           | 0           | 1          |
| AT5G03880 | 0           | 1           | 0           | 1          |
| AT5G03890 | 0           | 1           | 0           | 1          |
| AT5G04050 | 0           | 1           | 0           | 1          |
| AT5G04060 | 0           | 1           | 0           | 1          |
| AT5G04090 | 1           | 1           | 0           | 1          |
| AT5G04110 | 1           | 1           | 0           | 1          |
| AT5G04120 | 1           | 1           | 1           | 1          |
| AT5G04130 | 0           | 1           | 0           | 1          |
| AT5G04140 | 0           | 1           | 0           | 1          |
| AT5G04180 | 0           | 1           | 1           | 1          |
| AT5G04190 | 0           | 1           | 1           | 1          |
| AT5G04310 | 0           | 1           | 0           | 1          |
| AT5G04330 | 0           | 1           | 0           | 1          |
| AT5G04340 | 0           | 1           | 0           | 1          |
| AT5G04470 | 0           | 1           | 0           | 1          |
| AT5G04480 | 0           | 1           | 0           | 1          |
| AT5G04530 | 0           | 1           | 0           | 1          |
| AT5G04540 | 0           | 1           | 0           | 1          |
| AT5G04550 | 0           | 1           | 1           | 1          |
| AT5G04560 | 0           | 1           | 0           | 1          |
| AT5G04590 | 0           | 1           | 0           | 1          |
| AT5G04710 | 0           | 1           | 0           | 1          |
| AT5G04720 | 0           | 1           | 0           | 1          |
| AT5G04760 | 0           | 1           | 0           | 1          |
| AT5G04770 | 0           | 1           | 0           | 1          |
| AT5G04780 | 0           | 1           | 0           | 1          |
| AT5G04830 | 1           | 0           | 0           | 1          |
| AT5G04840 | 1           | 0           | 0           | 1          |
| AT5G05140 | 0           | 1           | 1           | 1          |
| AT5G05150 | 0           | 1           | 0           | 1          |
| AT5G05170 | 0           | 1           | 1           | 1          |
| AT5G05180 | 0           | 1           | 1           | 1          |
| AT5G05250 | 1           | 1           | 0           | 1          |
| AT5G05260 | 0           | 1           | 0           | 1          |
| AT5G05430 | 0           | 0           | 1           | 1          |
| AT5G05435 | 0           | 1           | 0           | 1          |
| AT5G05440 | 1           | 1           | 1           | 1          |
| AT5G05590 | 0           | 0           | 1           | 1          |
| AT5G05598 | 0           | 0           | 1           | 1          |
| AT5G05690 | 0           | 1           | 1           | 1          |
| AT5G05700 | 0           | 1           | 0           | 1          |
| AT5G05850 | 0           | 1           | 0           | 1          |
| AT5G05860 | 0           | 1           | 0           | 1          |
| AT5G05965 | 1           | 1           | 1           | 1          |
| AT5G05970 | 1           | 1           | 1           | 1          |
| AT5G06190 | 0           | 1           | 0           | 1          |
| AT5G06200 | 0           | 1           | 0           | 1          |
| AT5G06380 | 0           | 1           | 0           | 1          |
| AT5G06390 | 0           | 1           | 0           | 1          |

Appendix Table S4

| Name      | PIF3_target | PIF4_target | PIF5_target | PIF_target |
|-----------|-------------|-------------|-------------|------------|
| AT5G06530 | 1           | 1           | 0           | 1          |
| AT5G06540 | 0           | 1           | 0           | 1          |
| AT5G06700 | 0           | 1           | 1           | 1          |
| AT5G06710 | 0           | 1           | 0           | 1          |
| AT5G06720 | 0           | 1           | 0           | 1          |
| AT5G06790 | 0           | 0           | 1           | 1          |
| AT5G06839 | 0           | 1           | 0           | 1          |
| AT5G06865 | 0           | 1           | 0           | 1          |
| AT5G06920 | 0           | 1           | 0           | 1          |
| AT5G06930 | 0           | 1           | 0           | 1          |
| AT5G06970 | 0           | 1           | 1           | 1          |
| AT5G06980 | 0           | 1           | 1           | 1          |
| AT5G07000 | 0           | 1           | 0           | 1          |
| AT5G07010 | 1           | 1           | 1           | 1          |
| AT5G07020 | 0           | 1           | 0           | 1          |
| AT5G07030 | 0           | 1           | 0           | 1          |
| AT5G07070 | 1           | 0           | 1           | 1          |
| AT5G07080 | 1           | 0           | 1           | 1          |
| AT5G07190 | 0           | 1           | 0           | 1          |
| AT5G07200 | 0           | 1           | 0           | 1          |
| AT5G07230 | 0           | 1           | 0           | 1          |
| AT5G07240 | 0           | 1           | 0           | 1          |
| AT5G07270 | 0           | 1           | 0           | 1          |
| AT5G07280 | 0           | 1           | 0           | 1          |
| AT5G07430 | 0           | 1           | 0           | 1          |
| AT5G07440 | 0           | 1           | 0           | 1          |
| AT5G07571 | 0           | 0           | 1           | 1          |
| AT5G07580 | 0           | 1           | 1           | 1          |
| AT5G07730 | 0           | 1           | 0           | 1          |
| AT5G07760 | 0           | 1           | 0           | 1          |
| AT5G07920 | 1           | 1           | 1           | 1          |
| AT5G07930 | 1           | 1           | 1           | 1          |
| AT5G07980 | 0           | 1           | 0           | 1          |
| AT5G07990 | 0           | 1           | 0           | 1          |
| AT5G08075 | 0           | 1           | 0           | 1          |
| AT5G08080 | 0           | 1           | 0           | 1          |
| AT5G08130 | 1           | 1           | 1           | 1          |
| AT5G08139 | 1           | 1           | 1           | 1          |
| AT5G08141 | 0           | 1           | 0           | 1          |
| AT5G08150 | 0           | 1           | 0           | 1          |
| AT5G08230 | 0           | 0           | 1           | 1          |
| AT5G08240 | 0           | 0           | 1           | 1          |
| AT5G08320 | 0           | 1           | 0           | 1          |
| AT5G08330 | 1           | 1           | 1           | 1          |
| AT5G08350 | 0           | 1           | 1           | 1          |
| AT5G08360 | 0           | 1           | 1           | 1          |
| AT5G08505 | 0           | 1           | 0           | 1          |
| AT5G08510 | 0           | 1           | 0           | 1          |
| AT5G08520 | 0           | 1           | 0           | 1          |
| AT5G08530 | 0           | 1           | 0           | 1          |
| AT5G09350 | 1           | 0           | 0           | 1          |



Appendix Table S4

| Name      | PIF3_target | PIF4_target | PIF5_target | PIF_target |
|-----------|-------------|-------------|-------------|------------|
| AT5G09370 | 0           | 1           | 0           | 1          |
| AT5G09430 | 0           | 1           | 0           | 1          |
| AT5G09440 | 0           | 1           | 0           | 1          |
| AT5G09460 | 0           | 1           | 0           | 1          |
| AT5G09461 | 0           | 1           | 0           | 1          |
| AT5G09462 | 0           | 1           | 0           | 1          |
| AT5G09463 | 0           | 1           | 0           | 1          |
| AT5G09520 | 0           | 1           | 0           | 1          |
| AT5G09805 | 0           | 1           | 0           | 1          |
| AT5G09810 | 1           | 1           | 1           | 1          |
| AT5G09970 | 0           | 1           | 0           | 1          |
| AT5G09975 | 0           | 1           | 0           | 1          |
| AT5G10100 | 0           | 1           | 0           | 1          |
| AT5G10110 | 0           | 1           | 0           | 1          |
| AT5G10130 | 0           | 1           | 0           | 1          |
| AT5G10140 | 0           | 1           | 0           | 1          |
| AT5G10430 | 0           | 1           | 0           | 1          |
| AT5G10440 | 0           | 1           | 0           | 1          |
| AT5G10450 | 0           | 1           | 0           | 1          |
| AT5G10455 | 0           | 1           | 0           | 1          |
| AT5G10510 | 0           | 1           | 0           | 1          |
| AT5G10550 | 0           | 1           | 0           | 1          |
| AT5G10560 | 0           | 1           | 0           | 1          |
| AT5G10740 | 1           | 1           | 0           | 1          |
| AT5G10745 | 1           | 1           | 1           | 1          |
| AT5G10750 | 0           | 0           | 1           | 1          |
| AT5G10930 | 0           | 1           | 0           | 1          |
| AT5G10940 | 0           | 1           | 0           | 1          |
| AT5G10990 | 0           | 1           | 0           | 1          |
| AT5G11000 | 0           | 1           | 0           | 1          |
| AT5G11050 | 0           | 1           | 0           | 1          |
| AT5G11060 | 0           | 1           | 0           | 1          |
| AT5G11090 | 0           | 1           | 0           | 1          |
| AT5G11100 | 0           | 1           | 0           | 1          |
| AT5G11260 | 0           | 1           | 0           | 1          |
| AT5G11270 | 0           | 1           | 0           | 1          |
| AT5G11520 | 0           | 1           | 0           | 1          |
| AT5G11530 | 0           | 1           | 0           | 1          |
| AT5G11640 | 0           | 1           | 0           | 1          |
| AT5G11650 | 0           | 1           | 0           | 1          |
| AT5G11660 | 0           | 1           | 0           | 1          |
| AT5G11670 | 0           | 1           | 0           | 1          |
| AT5G11730 | 0           | 1           | 0           | 1          |
| AT5G11740 | 0           | 1           | 0           | 1          |
| AT5G11930 | 1           | 0           | 0           | 1          |
| AT5G11940 | 1           | 0           | 0           | 1          |
| AT5G11950 | 0           | 1           | 1           | 1          |
| AT5G11960 | 0           | 1           | 0           | 1          |
| AT5G11970 | 0           | 1           | 1           | 1          |
| AT5G11977 | 0           | 1           | 1           | 1          |
| AT5G12010 | 0           | 1           | 0           | 1          |

Appendix Table S4

| Name      | PIF3_target | PIF4_target | PIF5_target | PIF_target |
|-----------|-------------|-------------|-------------|------------|
| AT5G12020 | 0           | 1           | 0           | 1          |
| AT5G12040 | 0           | 1           | 0           | 1          |
| AT5G12043 | 0           | 1           | 1           | 1          |
| AT5G12250 | 0           | 1           | 1           | 1          |
| AT5G12260 | 0           | 1           | 1           | 1          |
| AT5G12270 | 0           | 1           | 0           | 1          |
| AT5G12900 | 0           | 0           | 1           | 1          |
| AT5G13090 | 1           | 1           | 0           | 1          |
| AT5G13100 | 1           | 1           | 0           | 1          |
| AT5G13110 | 0           | 1           | 0           | 1          |
| AT5G13140 | 0           | 1           | 0           | 1          |
| AT5G13150 | 0           | 1           | 0           | 1          |
| AT5G13170 | 0           | 1           | 0           | 1          |
| AT5G13180 | 0           | 1           | 0           | 1          |
| AT5G13220 | 0           | 1           | 0           | 1          |
| AT5G13240 | 0           | 1           | 0           | 1          |
| AT5G13250 | 0           | 1           | 0           | 1          |
| AT5G13260 | 1           | 0           | 0           | 1          |
| AT5G13460 | 0           | 0           | 1           | 1          |
| AT5G13550 | 0           | 1           | 0           | 1          |
| AT5G13560 | 0           | 1           | 0           | 1          |
| AT5G13710 | 0           | 1           | 0           | 1          |
| AT5G13730 | 1           | 1           | 1           | 1          |
| AT5G13740 | 1           | 1           | 1           | 1          |
| AT5G13750 | 0           | 1           | 0           | 1          |
| AT5G13760 | 0           | 1           | 0           | 1          |
| AT5G13810 | 0           | 1           | 0           | 1          |
| AT5G13820 | 1           | 1           | 0           | 1          |
| AT5G13990 | 0           | 1           | 0           | 1          |
| AT5G14000 | 0           | 1           | 0           | 1          |
| AT5G14080 | 0           | 1           | 0           | 1          |
| AT5G14090 | 0           | 1           | 0           | 1          |
| AT5G14230 | 0           | 1           | 0           | 1          |
| AT5G14350 | 0           | 1           | 0           | 1          |
| AT5G14360 | 0           | 1           | 0           | 1          |
| AT5G14370 | 0           | 1           | 0           | 1          |
| AT5G14380 | 0           | 1           | 0           | 1          |
| AT5G14420 | 0           | 1           | 1           | 1          |
| AT5G14430 | 0           | 1           | 1           | 1          |
| AT5G14640 | 0           | 1           | 0           | 1          |
| AT5G14650 | 0           | 1           | 0           | 1          |
| AT5G14690 | 1           | 1           | 1           | 1          |
| AT5G14700 | 0           | 1           | 0           | 1          |
| AT5G14710 | 0           | 1           | 0           | 1          |
| AT5G14780 | 0           | 1           | 0           | 1          |
| AT5G14790 | 0           | 1           | 0           | 1          |
| AT5G14910 | 0           | 1           | 1           | 1          |
| AT5G14920 | 0           | 1           | 1           | 1          |
| AT5G15150 | 0           | 1           | 1           | 1          |
| AT5G15160 | 0           | 1           | 0           | 1          |
| AT5G15220 | 0           | 1           | 1           | 1          |

Appendix Table S4

| Name      | PIF3_target | PIF4_target | PIF5_target | PIF_target |
|-----------|-------------|-------------|-------------|------------|
| AT5G15230 | 0           | 1           | 1           | 1          |
| AT5G15260 | 0           | 1           | 1           | 1          |
| AT5G15265 | 0           | 1           | 1           | 1          |
| AT5G15340 | 0           | 1           | 0           | 1          |
| AT5G15350 | 0           | 1           | 0           | 1          |
| AT5G15410 | 0           | 1           | 0           | 1          |
| AT5G15420 | 0           | 1           | 0           | 1          |
| AT5G15430 | 0           | 1           | 0           | 1          |
| AT5G15440 | 0           | 1           | 0           | 1          |
| AT5G15580 | 1           | 1           | 1           | 1          |
| AT5G15581 | 0           | 0           | 1           | 1          |
| AT5G15600 | 1           | 1           | 0           | 1          |
| AT5G15860 | 0           | 1           | 0           | 1          |
| AT5G15870 | 0           | 1           | 0           | 1          |
| AT5G15970 | 0           | 0           | 1           | 1          |
| AT5G16000 | 0           | 0           | 1           | 1          |
| AT5G16010 | 0           | 0           | 1           | 1          |
| AT5G16023 | 1           | 1           | 1           | 1          |
| AT5G16030 | 1           | 1           | 1           | 1          |
| AT5G16110 | 1           | 0           | 0           | 1          |
| AT5G16120 | 1           | 0           | 0           | 1          |
| AT5G16200 | 0           | 1           | 1           | 1          |
| AT5G16210 | 1           | 1           | 1           | 1          |
| AT5G16220 | 0           | 1           | 0           | 1          |
| AT5G16270 | 1           | 0           | 0           | 1          |
| AT5G16375 | 0           | 1           | 0           | 1          |
| AT5G16380 | 0           | 1           | 0           | 1          |
| AT5G16560 | 0           | 1           | 0           | 1          |
| AT5G16567 | 0           | 1           | 0           | 1          |
| AT5G16570 | 0           | 1           | 0           | 1          |
| AT5G16590 | 0           | 1           | 0           | 1          |
| AT5G16600 | 0           | 1           | 0           | 1          |
| AT5G16830 | 1           | 0           | 0           | 1          |
| AT5G16840 | 1           | 0           | 0           | 1          |
| AT5G16910 | 0           | 1           | 0           | 1          |
| AT5G16920 | 0           | 1           | 0           | 1          |
| AT5G17160 | 0           | 1           | 0           | 1          |
| AT5G17165 | 0           | 1           | 0           | 1          |
| AT5G17230 | 1           | 0           | 0           | 1          |
| AT5G17233 | 0           | 1           | 0           | 1          |
| AT5G17240 | 1           | 0           | 0           | 1          |
| AT5G17430 | 0           | 1           | 0           | 1          |
| AT5G17440 | 0           | 1           | 0           | 1          |
| AT5G17640 | 1           | 1           | 0           | 1          |
| AT5G17650 | 0           | 1           | 0           | 1          |
| AT5G17760 | 1           | 0           | 0           | 1          |
| AT5G17770 | 0           | 1           | 0           | 1          |
| AT5G17790 | 1           | 0           | 0           | 1          |
| AT5G17800 | 1           | 0           | 0           | 1          |
| AT5G17840 | 0           | 1           | 0           | 1          |
| AT5G17847 | 0           | 1           | 0           | 1          |

Appendix Table S4

| Name      | PIF3_target | PIF4_target | PIF5_target | PIF_target |
|-----------|-------------|-------------|-------------|------------|
| AT5G17900 | 0           | 1           | 0           | 1          |
| AT5G17910 | 0           | 1           | 0           | 1          |
| AT5G17920 | 0           | 1           | 1           | 1          |
| AT5G17930 | 0           | 1           | 1           | 1          |
| AT5G18010 | 0           | 1           | 1           | 1          |
| AT5G18015 | 0           | 1           | 0           | 1          |
| AT5G18020 | 1           | 1           | 1           | 1          |
| AT5G18030 | 1           | 1           | 1           | 1          |
| AT5G18050 | 0           | 1           | 1           | 1          |
| AT5G18060 | 0           | 1           | 1           | 1          |
| AT5G18070 | 0           | 1           | 0           | 1          |
| AT5G18080 | 0           | 1           | 1           | 1          |
| AT5G18270 | 1           | 0           | 0           | 1          |
| AT5G18280 | 0           | 1           | 0           | 1          |
| AT5G18310 | 0           | 1           | 1           | 1          |
| AT5G18460 | 0           | 1           | 0           | 1          |
| AT5G18470 | 0           | 1           | 0           | 1          |
| AT5G18560 | 0           | 1           | 0           | 1          |
| AT5G18570 | 0           | 1           | 0           | 1          |
| AT5G18590 | 0           | 1           | 0           | 1          |
| AT5G18600 | 0           | 1           | 0           | 1          |
| AT5G18610 | 1           | 1           | 0           | 1          |
| AT5G18640 | 0           | 1           | 0           | 1          |
| AT5G18650 | 1           | 1           | 1           | 1          |
| AT5G18661 | 0           | 1           | 0           | 1          |
| AT5G18670 | 0           | 1           | 0           | 1          |
| AT5G18680 | 0           | 1           | 0           | 1          |
| AT5G18690 | 0           | 1           | 0           | 1          |
| AT5G18820 | 0           | 1           | 0           | 1          |
| AT5G18830 | 0           | 1           | 0           | 1          |
| AT5G18850 | 0           | 1           | 0           | 1          |
| AT5G18860 | 1           | 1           | 1           | 1          |
| AT5G18910 | 1           | 1           | 0           | 1          |
| AT5G18920 | 1           | 1           | 0           | 1          |
| AT5G18930 | 0           | 1           | 0           | 1          |
| AT5G18940 | 0           | 1           | 0           | 1          |
| AT5G19010 | 0           | 1           | 0           | 1          |
| AT5G19020 | 0           | 1           | 0           | 1          |
| AT5G19090 | 0           | 1           | 0           | 1          |
| AT5G19095 | 0           | 1           | 0           | 1          |
| AT5G19100 | 1           | 0           | 0           | 1          |
| AT5G19110 | 0           | 1           | 0           | 1          |
| AT5G19120 | 0           | 1           | 0           | 1          |
| AT5G19130 | 0           | 1           | 0           | 1          |
| AT5G19140 | 0           | 1           | 0           | 1          |
| AT5G19180 | 0           | 1           | 0           | 1          |
| AT5G19190 | 0           | 1           | 1           | 1          |
| AT5G19200 | 0           | 1           | 1           | 1          |
| AT5G19380 | 0           | 1           | 0           | 1          |
| AT5G19390 | 0           | 1           | 0           | 1          |
| AT5G19730 | 0           | 0           | 1           | 1          |

Appendix Table S4

| Name      | PIF3_target | PIF4_target | PIF5_target | PIF_target |
|-----------|-------------|-------------|-------------|------------|
| AT5G19770 | 0           | 1           | 0           | 1          |
| AT5G19780 | 0           | 1           | 0           | 1          |
| AT5G19810 | 0           | 1           | 0           | 1          |
| AT5G19820 | 0           | 1           | 0           | 1          |
| AT5G19860 | 0           | 1           | 0           | 1          |
| AT5G19930 | 0           | 1           | 0           | 1          |
| AT5G19940 | 0           | 1           | 0           | 1          |
| AT5G20030 | 0           | 1           | 0           | 1          |
| AT5G20040 | 0           | 1           | 0           | 1          |
| AT5G20110 | 0           | 1           | 1           | 1          |
| AT5G20170 | 0           | 0           | 1           | 1          |
| AT5G20180 | 0           | 0           | 1           | 1          |
| AT5G20181 | 0           | 1           | 1           | 1          |
| AT5G20190 | 0           | 1           | 1           | 1          |
| AT5G20250 | 0           | 1           | 0           | 1          |
| AT5G20280 | 0           | 1           | 0           | 1          |
| AT5G20290 | 0           | 1           | 0           | 1          |
| AT5G20630 | 1           | 1           | 0           | 1          |
| AT5G20635 | 0           | 1           | 0           | 1          |
| AT5G20700 | 0           | 1           | 1           | 1          |
| AT5G20710 | 0           | 1           | 1           | 1          |
| AT5G21090 | 0           | 1           | 0           | 1          |
| AT5G21100 | 0           | 1           | 0           | 1          |
| AT5G21280 | 0           | 1           | 0           | 1          |
| AT5G21482 | 0           | 1           | 0           | 1          |
| AT5G21940 | 1           | 1           | 1           | 1          |
| AT5G21950 | 0           | 1           | 0           | 1          |
| AT5G21990 | 1           | 1           | 1           | 1          |
| AT5G22090 | 0           | 1           | 0           | 1          |
| AT5G22100 | 0           | 1           | 0           | 1          |
| AT5G22490 | 0           | 1           | 0           | 1          |
| AT5G22500 | 0           | 1           | 0           | 1          |
| AT5G22630 | 0           | 1           | 0           | 1          |
| AT5G22640 | 0           | 1           | 0           | 1          |
| AT5G22740 | 0           | 1           | 1           | 1          |
| AT5G22910 | 0           | 1           | 0           | 1          |
| AT5G22920 | 0           | 1           | 0           | 1          |
| AT5G22930 | 0           | 1           | 0           | 1          |
| AT5G22940 | 0           | 1           | 1           | 1          |
| AT5G22950 | 0           | 1           | 0           | 1          |
| AT5G23010 | 0           | 1           | 0           | 1          |
| AT5G23020 | 0           | 1           | 0           | 1          |
| AT5G23210 | 0           | 1           | 0           | 1          |
| AT5G23270 | 0           | 1           | 0           | 1          |
| AT5G23280 | 1           | 1           | 1           | 1          |
| AT5G23350 | 0           | 1           | 0           | 1          |
| AT5G23360 | 0           | 1           | 0           | 1          |
| AT5G23850 | 0           | 1           | 0           | 1          |
| AT5G23860 | 0           | 1           | 1           | 1          |
| AT5G23870 | 0           | 1           | 1           | 1          |
| AT5G24000 | 0           | 1           | 0           | 1          |

Appendix Table S4

| Name      | PIF3_target | PIF4_target | PIF5_target | PIF_target |
|-----------|-------------|-------------|-------------|------------|
| AT5G24030 | 0           | 1           | 0           | 1          |
| AT5G24590 | 0           | 1           | 0           | 1          |
| AT5G24593 | 0           | 1           | 0           | 1          |
| AT5G24600 | 1           | 0           | 1           | 1          |
| AT5G24610 | 1           | 0           | 1           | 1          |
| AT5G24870 | 0           | 1           | 0           | 1          |
| AT5G24879 | 0           | 1           | 0           | 1          |
| AT5G24910 | 0           | 1           | 0           | 1          |
| AT5G24920 | 0           | 1           | 0           | 1          |
| AT5G24930 | 0           | 1           | 0           | 1          |
| AT5G25102 | 0           | 1           | 0           | 1          |
| AT5G25110 | 0           | 1           | 0           | 1          |
| AT5G25190 | 1           | 1           | 0           | 1          |
| AT5G25200 | 0           | 1           | 0           | 1          |
| AT5G25210 | 0           | 1           | 0           | 1          |
| AT5G25220 | 0           | 1           | 0           | 1          |
| AT5G25240 | 0           | 1           | 0           | 1          |
| AT5G25250 | 0           | 1           | 0           | 1          |
| AT5G25270 | 0           | 1           | 0           | 1          |
| AT5G25280 | 0           | 1           | 0           | 1          |
| AT5G25290 | 0           | 1           | 1           | 1          |
| AT5G25350 | 0           | 1           | 0           | 1          |
| AT5G25360 | 0           | 1           | 0           | 1          |
| AT5G25450 | 0           | 1           | 0           | 1          |
| AT5G25460 | 1           | 1           | 1           | 1          |
| AT5G25620 | 0           | 1           | 0           | 1          |
| AT5G25810 | 0           | 1           | 0           | 1          |
| AT5G25820 | 0           | 1           | 0           | 1          |
| AT5G26140 | 0           | 1           | 0           | 1          |
| AT5G26146 | 1           | 1           | 0           | 1          |
| AT5G26190 | 1           | 1           | 0           | 1          |
| AT5G26200 | 1           | 1           | 0           | 1          |
| AT5G26340 | 1           | 0           | 0           | 1          |
| AT5G26345 | 1           | 0           | 0           | 1          |
| AT5G26780 | 0           | 1           | 0           | 1          |
| AT5G26790 | 0           | 1           | 0           | 1          |
| AT5G26960 | 0           | 1           | 0           | 1          |
| AT5G27030 | 0           | 1           | 0           | 1          |
| AT5G27050 | 0           | 1           | 0           | 1          |
| AT5G27210 | 0           | 1           | 1           | 1          |
| AT5G27220 | 0           | 1           | 1           | 1          |
| AT5G27520 | 0           | 1           | 0           | 1          |
| AT5G27920 | 1           | 1           | 0           | 1          |
| AT5G27930 | 0           | 1           | 0           | 1          |
| AT5G27940 | 0           | 1           | 0           | 1          |
| AT5G28020 | 0           | 0           | 1           | 1          |
| AT5G28040 | 0           | 1           | 0           | 1          |
| AT5G28050 | 0           | 1           | 0           | 1          |
| AT5G28090 | 0           | 1           | 0           | 1          |
| AT5G28143 | 1           | 0           | 0           | 1          |
| AT5G28145 | 1           | 0           | 1           | 1          |

Appendix Table S4

| Name      | PIF3_target | PIF4_target | PIF5_target | PIF_target |
|-----------|-------------|-------------|-------------|------------|
| AT5G28150 | 0           | 1           | 0           | 1          |
| AT5G28300 | 1           | 1           | 1           | 1          |
| AT5G28310 | 0           | 1           | 0           | 1          |
| AT5G28470 | 0           | 1           | 0           | 1          |
| AT5G28490 | 0           | 1           | 0           | 1          |
| AT5G28620 | 1           | 1           | 0           | 1          |
| AT5G28622 | 1           | 0           | 0           | 1          |
| AT5G28630 | 0           | 1           | 0           | 1          |
| AT5G28640 | 0           | 1           | 0           | 1          |
| AT5G28642 | 0           | 1           | 0           | 1          |
| AT5G28646 | 0           | 1           | 0           | 1          |
| AT5G35407 | 0           | 1           | 0           | 1          |
| AT5G35410 | 0           | 1           | 0           | 1          |
| AT5G35525 | 0           | 1           | 0           | 1          |
| AT5G36240 | 1           | 0           | 0           | 1          |
| AT5G36250 | 1           | 0           | 0           | 1          |
| AT5G37010 | 0           | 1           | 0           | 1          |
| AT5G37020 | 0           | 1           | 0           | 1          |
| AT5G37260 | 1           | 0           | 0           | 1          |
| AT5G38130 | 0           | 1           | 0           | 1          |
| AT5G38140 | 0           | 1           | 0           | 1          |
| AT5G38420 | 0           | 1           | 0           | 1          |
| AT5G38430 | 0           | 1           | 0           | 1          |
| AT5G38470 | 0           | 1           | 0           | 1          |
| AT5G38480 | 0           | 1           | 0           | 1          |
| AT5G38510 | 0           | 1           | 0           | 1          |
| AT5G38520 | 0           | 1           | 0           | 1          |
| AT5G38690 | 0           | 1           | 0           | 1          |
| AT5G38700 | 0           | 1           | 0           | 1          |
| AT5G38970 | 0           | 1           | 0           | 1          |
| AT5G38980 | 0           | 1           | 0           | 1          |
| AT5G39040 | 0           | 1           | 0           | 1          |
| AT5G39050 | 0           | 1           | 0           | 1          |
| AT5G39080 | 0           | 1           | 0           | 1          |
| AT5G39200 | 0           | 1           | 0           | 1          |
| AT5G39210 | 0           | 1           | 0           | 1          |
| AT5G39230 | 0           | 1           | 0           | 1          |
| AT5G39240 | 0           | 1           | 0           | 1          |
| AT5G39250 | 0           | 1           | 0           | 1          |
| AT5G39560 | 1           | 1           | 0           | 1          |
| AT5G39570 | 1           | 1           | 0           | 1          |
| AT5G39760 | 0           | 1           | 0           | 1          |
| AT5G39770 | 0           | 1           | 0           | 1          |
| AT5G39850 | 0           | 1           | 0           | 1          |
| AT5G39860 | 0           | 1           | 1           | 1          |
| AT5G40340 | 0           | 1           | 1           | 1          |
| AT5G40348 | 0           | 1           | 0           | 1          |
| AT5G40460 | 0           | 1           | 0           | 1          |
| AT5G40470 | 0           | 1           | 0           | 1          |
| AT5G40630 | 1           | 1           | 0           | 1          |
| AT5G40640 | 1           | 1           | 0           | 1          |

Appendix Table S4

| Name      | PIF3_target | PIF4_target | PIF5_target | PIF_target |
|-----------|-------------|-------------|-------------|------------|
| AT5G40855 | 1           | 0           | 0           | 1          |
| AT5G40860 | 1           | 0           | 0           | 1          |
| AT5G40890 | 0           | 1           | 0           | 1          |
| AT5G41071 | 0           | 1           | 0           | 1          |
| AT5G41080 | 0           | 1           | 0           | 1          |
| AT5G41130 | 1           | 1           | 1           | 1          |
| AT5G41140 | 1           | 1           | 0           | 1          |
| AT5G41401 | 0           | 1           | 0           | 1          |
| AT5G41460 | 0           | 1           | 0           | 1          |
| AT5G41470 | 0           | 1           | 0           | 1          |
| AT5G41590 | 0           | 1           | 1           | 1          |
| AT5G41600 | 0           | 1           | 1           | 1          |
| AT5G41774 | 0           | 1           | 0           | 1          |
| AT5G41905 | 1           | 1           | 1           | 1          |
| AT5G41908 | 1           | 1           | 1           | 1          |
| AT5G42100 | 0           | 1           | 0           | 1          |
| AT5G42380 | 0           | 0           | 1           | 1          |
| AT5G42390 | 0           | 0           | 1           | 1          |
| AT5G42635 | 0           | 1           | 0           | 1          |
| AT5G42640 | 0           | 1           | 0           | 1          |
| AT5G42650 | 0           | 1           | 0           | 1          |
| AT5G42670 | 0           | 1           | 0           | 1          |
| AT5G42677 | 1           | 0           | 0           | 1          |
| AT5G42680 | 0           | 1           | 0           | 1          |
| AT5G42690 | 0           | 1           | 0           | 1          |
| AT5G42700 | 0           | 1           | 0           | 1          |
| AT5G42740 | 0           | 1           | 0           | 1          |
| AT5G42750 | 0           | 1           | 0           | 1          |
| AT5G42900 | 1           | 0           | 1           | 1          |
| AT5G43020 | 0           | 1           | 1           | 1          |
| AT5G43030 | 0           | 1           | 0           | 1          |
| AT5G43060 | 1           | 0           | 0           | 1          |
| AT5G43140 | 0           | 1           | 0           | 1          |
| AT5G43150 | 1           | 1           | 0           | 1          |
| AT5G43270 | 0           | 0           | 1           | 1          |
| AT5G43695 | 0           | 1           | 0           | 1          |
| AT5G43700 | 0           | 1           | 0           | 1          |
| AT5G43710 | 0           | 1           | 0           | 1          |
| AT5G43745 | 1           | 0           | 0           | 1          |
| AT5G43760 | 0           | 0           | 1           | 1          |
| AT5G43790 | 0           | 1           | 0           | 1          |
| AT5G43810 | 0           | 1           | 0           | 1          |
| AT5G43870 | 0           | 1           | 0           | 1          |
| AT5G43880 | 0           | 1           | 0           | 1          |
| AT5G43890 | 0           | 0           | 1           | 1          |
| AT5G44010 | 0           | 1           | 0           | 1          |
| AT5G44020 | 0           | 1           | 0           | 1          |
| AT5G44180 | 0           | 1           | 0           | 1          |
| AT5G44190 | 0           | 1           | 0           | 1          |
| AT5G44210 | 0           | 1           | 1           | 1          |
| AT5G44220 | 0           | 1           | 1           | 1          |



Appendix Table S4

| Name      | PIF3_target | PIF4_target | PIF5_target | PIF_target |
|-----------|-------------|-------------|-------------|------------|
| AT5G44250 | 0           | 1           | 0           | 1          |
| AT5G44260 | 0           | 1           | 0           | 1          |
| AT5G44410 | 0           | 1           | 0           | 1          |
| AT5G44440 | 0           | 1           | 0           | 1          |
| AT5G44450 | 0           | 1           | 0           | 1          |
| AT5G44460 | 0           | 1           | 0           | 1          |
| AT5G44570 | 0           | 1           | 0           | 1          |
| AT5G44572 | 0           | 1           | 0           | 1          |
| AT5G45095 | 0           | 1           | 0           | 1          |
| AT5G45100 | 1           | 1           | 0           | 1          |
| AT5G45340 | 1           | 1           | 1           | 1          |
| AT5G45350 | 0           | 1           | 0           | 1          |
| AT5G45380 | 0           | 1           | 0           | 1          |
| AT5G45580 | 1           | 1           | 0           | 1          |
| AT5G45590 | 0           | 1           | 0           | 1          |
| AT5G45830 | 0           | 1           | 0           | 1          |
| AT5G45960 | 0           | 1           | 0           | 1          |
| AT5G46170 | 0           | 1           | 0           | 1          |
| AT5G46180 | 0           | 1           | 0           | 1          |
| AT5G46240 | 0           | 1           | 0           | 1          |
| AT5G46250 | 0           | 1           | 1           | 1          |
| AT5G46320 | 0           | 0           | 1           | 1          |
| AT5G46325 | 0           | 1           | 0           | 1          |
| AT5G46330 | 0           | 1           | 1           | 1          |
| AT5G46680 | 0           | 1           | 0           | 1          |
| AT5G46690 | 0           | 1           | 1           | 1          |
| AT5G46710 | 0           | 1           | 0           | 1          |
| AT5G46720 | 0           | 1           | 0           | 1          |
| AT5G46845 | 0           | 1           | 0           | 1          |
| AT5G46850 | 0           | 1           | 0           | 1          |
| AT5G47040 | 1           | 1           | 0           | 1          |
| AT5G47050 | 0           | 1           | 0           | 1          |
| AT5G47060 | 0           | 1           | 0           | 1          |
| AT5G47180 | 1           | 1           | 0           | 1          |
| AT5G47190 | 0           | 1           | 0           | 1          |
| AT5G47230 | 0           | 1           | 0           | 1          |
| AT5G47240 | 0           | 1           | 0           | 1          |
| AT5G47370 | 1           | 1           | 1           | 1          |
| AT5G47380 | 1           | 1           | 1           | 1          |
| AT5G47390 | 1           | 0           | 0           | 1          |
| AT5G47410 | 0           | 1           | 0           | 1          |
| AT5G47420 | 1           | 1           | 0           | 1          |
| AT5G47500 | 0           | 1           | 1           | 1          |
| AT5G47510 | 0           | 1           | 1           | 1          |
| AT5G47540 | 0           | 1           | 0           | 1          |
| AT5G47550 | 0           | 1           | 0           | 1          |
| AT5G47560 | 0           | 1           | 0           | 1          |
| AT5G47610 | 0           | 1           | 0           | 1          |
| AT5G47620 | 0           | 1           | 0           | 1          |
| AT5G47635 | 0           | 1           | 1           | 1          |
| AT5G47640 | 0           | 1           | 1           | 1          |

Appendix Table S4

| Name      | PIF3_target | PIF4_target | PIF5_target | PIF_target |
|-----------|-------------|-------------|-------------|------------|
| AT5G47730 | 0           | 1           | 0           | 1          |
| AT5G47740 | 0           | 1           | 0           | 1          |
| AT5G47770 | 0           | 1           | 0           | 1          |
| AT5G47780 | 0           | 1           | 0           | 1          |
| AT5G47810 | 0           | 1           | 0           | 1          |
| AT5G47818 | 1           | 0           | 1           | 1          |
| AT5G47820 | 1           | 1           | 1           | 1          |
| AT5G48150 | 0           | 1           | 1           | 1          |
| AT5G48190 | 0           | 1           | 0           | 1          |
| AT5G48200 | 0           | 1           | 0           | 1          |
| AT5G48250 | 1           | 1           | 0           | 1          |
| AT5G48270 | 0           | 1           | 0           | 1          |
| AT5G48450 | 0           | 1           | 0           | 1          |
| AT5G48460 | 0           | 1           | 0           | 1          |
| AT5G48540 | 1           | 1           | 1           | 1          |
| AT5G48543 | 1           | 1           | 0           | 1          |
| AT5G48545 | 1           | 1           | 0           | 1          |
| AT5G48640 | 0           | 1           | 0           | 1          |
| AT5G48650 | 0           | 1           | 0           | 1          |
| AT5G48890 | 0           | 1           | 0           | 1          |
| AT5G48900 | 1           | 1           | 1           | 1          |
| AT5G48905 | 0           | 1           | 1           | 1          |
| AT5G48930 | 0           | 1           | 0           | 1          |
| AT5G48940 | 0           | 1           | 0           | 1          |
| AT5G49070 | 0           | 1           | 0           | 1          |
| AT5G49090 | 0           | 0           | 1           | 1          |
| AT5G49100 | 0           | 1           | 1           | 1          |
| AT5G49170 | 0           | 1           | 0           | 1          |
| AT5G49280 | 0           | 1           | 0           | 1          |
| AT5G49290 | 0           | 1           | 0           | 1          |
| AT5G49360 | 0           | 1           | 0           | 1          |
| AT5G49370 | 0           | 1           | 0           | 1          |
| AT5G49690 | 0           | 1           | 1           | 1          |
| AT5G49700 | 0           | 1           | 1           | 1          |
| AT5G49710 | 0           | 1           | 0           | 1          |
| AT5G49800 | 0           | 1           | 0           | 1          |
| AT5G49810 | 0           | 1           | 0           | 1          |
| AT5G50000 | 0           | 1           | 0           | 1          |
| AT5G50010 | 0           | 1           | 0           | 1          |
| AT5G50335 | 0           | 1           | 0           | 1          |
| AT5G50340 | 0           | 1           | 0           | 1          |
| AT5G50890 | 0           | 1           | 0           | 1          |
| AT5G50900 | 0           | 1           | 0           | 1          |
| AT5G50910 | 0           | 1           | 0           | 1          |
| AT5G51200 | 0           | 1           | 0           | 1          |
| AT5G51210 | 1           | 1           | 0           | 1          |
| AT5G51451 | 0           | 1           | 0           | 1          |
| AT5G51460 | 1           | 1           | 1           | 1          |
| AT5G51550 | 0           | 1           | 0           | 1          |
| AT5G51560 | 0           | 1           | 0           | 1          |
| AT5G51780 | 0           | 1           | 0           | 1          |

Appendix Table S4

| Name      | PIF3_target | PIF4_target | PIF5_target | PIF_target |
|-----------|-------------|-------------|-------------|------------|
| AT5G51790 | 0           | 1           | 1           | 1          |
| AT5G51830 | 0           | 1           | 0           | 1          |
| AT5G51840 | 0           | 1           | 0           | 1          |
| AT5G52270 | 0           | 1           | 0           | 1          |
| AT5G52280 | 0           | 1           | 0           | 1          |
| AT5G52400 | 0           | 0           | 1           | 1          |
| AT5G52430 | 0           | 1           | 0           | 1          |
| AT5G52440 | 0           | 1           | 0           | 1          |
| AT5G52570 | 1           | 1           | 1           | 1          |
| AT5G52580 | 1           | 1           | 1           | 1          |
| AT5G52820 | 0           | 1           | 0           | 1          |
| AT5G52830 | 0           | 1           | 0           | 1          |
| AT5G52890 | 0           | 1           | 1           | 1          |
| AT5G52900 | 0           | 1           | 1           | 1          |
| AT5G52901 | 0           | 1           | 1           | 1          |
| AT5G53010 | 0           | 1           | 0           | 1          |
| AT5G53020 | 0           | 1           | 0           | 1          |
| AT5G53160 | 0           | 1           | 0           | 1          |
| AT5G53170 | 0           | 1           | 0           | 1          |
| AT5G53220 | 1           | 0           | 0           | 1          |
| AT5G53280 | 0           | 1           | 0           | 1          |
| AT5G53290 | 0           | 1           | 0           | 1          |
| AT5G53300 | 0           | 1           | 0           | 1          |
| AT5G53400 | 0           | 1           | 1           | 1          |
| AT5G53410 | 0           | 1           | 0           | 1          |
| AT5G53450 | 0           | 1           | 0           | 1          |
| AT5G53451 | 0           | 1           | 0           | 1          |
| AT5G53460 | 0           | 1           | 0           | 1          |
| AT5G53500 | 0           | 1           | 0           | 1          |
| AT5G53510 | 0           | 1           | 1           | 1          |
| AT5G53540 | 1           | 1           | 0           | 1          |
| AT5G53550 | 1           | 1           | 0           | 1          |
| AT5G53580 | 1           | 0           | 0           | 1          |
| AT5G53590 | 1           | 0           | 0           | 1          |
| AT5G53650 | 0           | 1           | 0           | 1          |
| AT5G53660 | 0           | 1           | 0           | 1          |
| AT5G53730 | 0           | 1           | 0           | 1          |
| AT5G53740 | 0           | 1           | 0           | 1          |
| AT5G53750 | 0           | 1           | 0           | 1          |
| AT5G53760 | 1           | 1           | 0           | 1          |
| AT5G53970 | 0           | 1           | 1           | 1          |
| AT5G53980 | 1           | 1           | 1           | 1          |
| AT5G54150 | 0           | 1           | 0           | 1          |
| AT5G54160 | 0           | 1           | 0           | 1          |
| AT5G54190 | 0           | 1           | 0           | 1          |
| AT5G54200 | 0           | 1           | 0           | 1          |
| AT5G54280 | 0           | 1           | 0           | 1          |
| AT5G54290 | 0           | 1           | 0           | 1          |
| AT5G54300 | 0           | 1           | 0           | 1          |
| AT5G54380 | 1           | 1           | 1           | 1          |
| AT5G54390 | 1           | 1           | 0           | 1          |

Appendix Table S4

| Name      | PIF3_target | PIF4_target | PIF5_target | PIF_target |
|-----------|-------------|-------------|-------------|------------|
| AT5G54470 | 1           | 1           | 1           | 1          |
| AT5G54480 | 1           | 1           | 1           | 1          |
| AT5G54500 | 0           | 1           | 0           | 1          |
| AT5G54510 | 1           | 1           | 1           | 1          |
| AT5G54520 | 1           | 1           | 0           | 1          |
| AT5G54530 | 1           | 1           | 0           | 1          |
| AT5G54580 | 0           | 1           | 1           | 1          |
| AT5G54585 | 0           | 1           | 1           | 1          |
| AT5G54590 | 1           | 1           | 1           | 1          |
| AT5G54660 | 0           | 1           | 0           | 1          |
| AT5G54670 | 0           | 1           | 0           | 1          |
| AT5G54700 | 0           | 1           | 0           | 1          |
| AT5G54710 | 0           | 1           | 0           | 1          |
| AT5G54745 | 0           | 1           | 0           | 1          |
| AT5G54790 | 1           | 0           | 0           | 1          |
| AT5G54800 | 1           | 0           | 0           | 1          |
| AT5G54940 | 0           | 1           | 0           | 1          |
| AT5G54950 | 0           | 1           | 0           | 1          |
| AT5G54960 | 1           | 1           | 0           | 1          |
| AT5G54970 | 1           | 1           | 0           | 1          |
| AT5G55090 | 0           | 1           | 0           | 1          |
| AT5G55100 | 0           | 1           | 0           | 1          |
| AT5G55120 | 0           | 0           | 1           | 1          |
| AT5G55820 | 0           | 1           | 0           | 1          |
| AT5G55830 | 0           | 1           | 0           | 1          |
| AT5G55840 | 0           | 1           | 0           | 1          |
| AT5G55850 | 0           | 1           | 0           | 1          |
| AT5G55910 | 0           | 1           | 0           | 1          |
| AT5G55920 | 0           | 1           | 0           | 1          |
| AT5G55950 | 0           | 1           | 0           | 1          |
| AT5G55960 | 0           | 1           | 0           | 1          |
| AT5G55970 | 0           | 1           | 0           | 1          |
| AT5G56030 | 0           | 1           | 0           | 1          |
| AT5G56040 | 0           | 1           | 1           | 1          |
| AT5G56050 | 0           | 1           | 0           | 1          |
| AT5G56160 | 0           | 1           | 0           | 1          |
| AT5G56170 | 0           | 1           | 0           | 1          |
| AT5G56210 | 0           | 1           | 0           | 1          |
| AT5G56220 | 0           | 1           | 0           | 1          |
| AT5G56230 | 0           | 1           | 0           | 1          |
| AT5G56240 | 0           | 1           | 0           | 1          |
| AT5G56250 | 0           | 1           | 0           | 1          |
| AT5G56490 | 0           | 1           | 0           | 1          |
| AT5G56500 | 0           | 1           | 0           | 1          |
| AT5G56550 | 0           | 1           | 0           | 1          |
| AT5G56560 | 0           | 1           | 0           | 1          |
| AT5G56860 | 0           | 1           | 0           | 1          |
| AT5G56865 | 0           | 1           | 0           | 1          |
| AT5G56890 | 0           | 1           | 0           | 1          |
| AT5G56900 | 0           | 1           | 0           | 1          |
| AT5G56980 | 1           | 1           | 0           | 1          |

Appendix Table S4

| Name      | PIF3_target | PIF4_target | PIF5_target | PIF_target |
|-----------|-------------|-------------|-------------|------------|
| AT5G56990 | 0           | 1           | 0           | 1          |
| AT5G57010 | 0           | 1           | 0           | 1          |
| AT5G57015 | 0           | 1           | 0           | 1          |
| AT5G57330 | 0           | 1           | 0           | 1          |
| AT5G57340 | 0           | 1           | 0           | 1          |
| AT5G57410 | 0           | 1           | 0           | 1          |
| AT5G57420 | 0           | 1           | 0           | 1          |
| AT5G57590 | 0           | 1           | 0           | 1          |
| AT5G57610 | 0           | 1           | 0           | 1          |
| AT5G57655 | 0           | 1           | 0           | 1          |
| AT5G57660 | 0           | 1           | 0           | 1          |
| AT5G57670 | 0           | 1           | 0           | 1          |
| AT5G57700 | 0           | 1           | 0           | 1          |
| AT5G57780 | 1           | 1           | 1           | 1          |
| AT5G57785 | 0           | 1           | 0           | 1          |
| AT5G57790 | 0           | 1           | 0           | 1          |
| AT5G57800 | 0           | 1           | 0           | 1          |
| AT5G58005 | 0           | 1           | 0           | 1          |
| AT5G58010 | 0           | 1           | 0           | 1          |
| AT5G58070 | 0           | 1           | 0           | 1          |
| AT5G58080 | 0           | 1           | 0           | 1          |
| AT5G58090 | 0           | 1           | 0           | 1          |
| AT5G58100 | 0           | 1           | 0           | 1          |
| AT5G58310 | 1           | 0           | 1           | 1          |
| AT5G58320 | 1           | 0           | 1           | 1          |
| AT5G58430 | 0           | 1           | 0           | 1          |
| AT5G58440 | 0           | 1           | 0           | 1          |
| AT5G58450 | 0           | 1           | 0           | 1          |
| AT5G58460 | 0           | 1           | 0           | 1          |
| AT5G58465 | 0           | 1           | 0           | 1          |
| AT5G58520 | 0           | 1           | 0           | 1          |
| AT5G58530 | 0           | 1           | 1           | 1          |
| AT5G58600 | 1           | 1           | 0           | 1          |
| AT5G58610 | 0           | 1           | 0           | 1          |
| AT5G58620 | 0           | 1           | 0           | 1          |
| AT5G58650 | 1           | 1           | 1           | 1          |
| AT5G58660 | 1           | 1           | 1           | 1          |
| AT5G58760 | 0           | 1           | 0           | 1          |
| AT5G58770 | 0           | 1           | 0           | 1          |
| AT5G58890 | 0           | 1           | 0           | 1          |
| AT5G58900 | 0           | 1           | 0           | 1          |
| AT5G58910 | 0           | 1           | 0           | 1          |
| AT5G59010 | 0           | 1           | 0           | 1          |
| AT5G59020 | 0           | 1           | 1           | 1          |
| AT5G59220 | 1           | 1           | 0           | 1          |
| AT5G59230 | 1           | 1           | 0           | 1          |
| AT5G59350 | 0           | 1           | 0           | 1          |
| AT5G59360 | 0           | 1           | 0           | 1          |
| AT5G59420 | 0           | 1           | 0           | 1          |
| AT5G59430 | 0           | 1           | 0           | 1          |
| AT5G59480 | 1           | 1           | 1           | 1          |

Appendix Table S4

| Name      | PIF3_target | PIF4_target | PIF5_target | PIF_target |
|-----------|-------------|-------------|-------------|------------|
| AT5G59490 | 0           | 1           | 0           | 1          |
| AT5G59505 | 0           | 1           | 1           | 1          |
| AT5G59510 | 0           | 1           | 1           | 1          |
| AT5G59540 | 0           | 1           | 0           | 1          |
| AT5G59550 | 0           | 1           | 0           | 1          |
| AT5G59560 | 0           | 1           | 0           | 1          |
| AT5G59730 | 0           | 1           | 0           | 1          |
| AT5G59740 | 0           | 1           | 0           | 1          |
| AT5G59790 | 1           | 0           | 1           | 1          |
| AT5G59810 | 0           | 1           | 0           | 1          |
| AT5G59820 | 0           | 1           | 0           | 1          |
| AT5G59870 | 0           | 1           | 0           | 1          |
| AT5G59880 | 0           | 1           | 0           | 1          |
| AT5G60010 | 0           | 1           | 0           | 1          |
| AT5G60022 | 0           | 1           | 0           | 1          |
| AT5G60190 | 0           | 1           | 0           | 1          |
| AT5G60200 | 0           | 1           | 0           | 1          |
| AT5G60290 | 0           | 1           | 0           | 1          |
| AT5G60300 | 0           | 1           | 0           | 1          |
| AT5G60408 | 0           | 1           | 0           | 1          |
| AT5G60410 | 0           | 1           | 0           | 1          |
| AT5G60450 | 0           | 1           | 0           | 1          |
| AT5G60460 | 0           | 1           | 0           | 1          |
| AT5G60670 | 1           | 1           | 1           | 1          |
| AT5G60680 | 1           | 1           | 1           | 1          |
| AT5G60690 | 0           | 1           | 0           | 1          |
| AT5G60750 | 0           | 1           | 0           | 1          |
| AT5G60760 | 0           | 1           | 0           | 1          |
| AT5G60840 | 1           | 1           | 1           | 1          |
| AT5G60850 | 1           | 1           | 0           | 1          |
| AT5G60860 | 0           | 1           | 1           | 1          |
| AT5G60880 | 0           | 1           | 1           | 1          |
| AT5G60890 | 0           | 1           | 1           | 1          |
| AT5G61270 | 0           | 1           | 0           | 1          |
| AT5G61280 | 0           | 1           | 0           | 1          |
| AT5G61430 | 0           | 1           | 0           | 1          |
| AT5G61440 | 0           | 1           | 0           | 1          |
| AT5G61445 | 0           | 1           | 0           | 1          |
| AT5G61450 | 0           | 1           | 0           | 1          |
| AT5G61510 | 0           | 1           | 0           | 1          |
| AT5G61520 | 0           | 0           | 1           | 1          |
| AT5G61530 | 0           | 0           | 1           | 1          |
| AT5G61560 | 0           | 1           | 0           | 1          |
| AT5G61570 | 0           | 1           | 0           | 1          |
| AT5G61660 | 0           | 1           | 1           | 1          |
| AT5G61670 | 0           | 1           | 1           | 1          |
| AT5G61790 | 0           | 1           | 0           | 1          |
| AT5G61800 | 0           | 1           | 0           | 1          |
| AT5G61820 | 0           | 1           | 0           | 1          |
| AT5G61830 | 0           | 1           | 0           | 1          |
| AT5G61850 | 0           | 1           | 0           | 1          |

Appendix Table S4

| Name      | PIF3_target | PIF4_target | PIF5_target | PIF_target |
|-----------|-------------|-------------|-------------|------------|
| AT5G61960 | 1           | 1           | 0           | 1          |
| AT5G61970 | 1           | 1           | 0           | 1          |
| AT5G61990 | 0           | 1           | 0           | 1          |
| AT5G61997 | 0           | 1           | 1           | 1          |
| AT5G62000 | 1           | 0           | 0           | 1          |
| AT5G62170 | 0           | 1           | 0           | 1          |
| AT5G62180 | 0           | 1           | 0           | 1          |
| AT5G62220 | 0           | 1           | 1           | 1          |
| AT5G62230 | 0           | 1           | 0           | 1          |
| AT5G62270 | 0           | 1           | 0           | 1          |
| AT5G62280 | 0           | 1           | 0           | 1          |
| AT5G62290 | 0           | 1           | 1           | 1          |
| AT5G62340 | 0           | 1           | 0           | 1          |
| AT5G62350 | 0           | 1           | 1           | 1          |
| AT5G62360 | 0           | 1           | 0           | 1          |
| AT5G62370 | 0           | 1           | 0           | 1          |
| AT5G62380 | 0           | 1           | 0           | 1          |
| AT5G62400 | 0           | 1           | 0           | 1          |
| AT5G62460 | 0           | 0           | 1           | 1          |
| AT5G62500 | 1           | 0           | 0           | 1          |
| AT5G62660 | 1           | 1           | 1           | 1          |
| AT5G62670 | 1           | 1           | 1           | 1          |
| AT5G62860 | 0           | 1           | 0           | 1          |
| AT5G62880 | 0           | 1           | 0           | 1          |
| AT5G63040 | 0           | 1           | 0           | 1          |
| AT5G63050 | 0           | 1           | 0           | 1          |
| AT5G63350 | 0           | 1           | 0           | 1          |
| AT5G63370 | 0           | 1           | 0           | 1          |
| AT5G63450 | 0           | 1           | 0           | 1          |
| AT5G63490 | 0           | 1           | 0           | 1          |
| AT5G63500 | 0           | 1           | 0           | 1          |
| AT5G63520 | 1           | 1           | 0           | 1          |
| AT5G63530 | 1           | 1           | 0           | 1          |
| AT5G63540 | 0           | 1           | 0           | 1          |
| AT5G63620 | 0           | 1           | 0           | 1          |
| AT5G63650 | 1           | 1           | 0           | 1          |
| AT5G63660 | 1           | 1           | 0           | 1          |
| AT5G63790 | 1           | 0           | 0           | 1          |
| AT5G63800 | 1           | 1           | 0           | 1          |
| AT5G63810 | 0           | 1           | 0           | 1          |
| AT5G63970 | 1           | 0           | 0           | 1          |
| AT5G63980 | 1           | 0           | 0           | 1          |
| AT5G64210 | 1           | 1           | 1           | 1          |
| AT5G64220 | 1           | 1           | 1           | 1          |
| AT5G64250 | 1           | 1           | 0           | 1          |
| AT5G64260 | 1           | 1           | 1           | 1          |
| AT5G64290 | 0           | 1           | 0           | 1          |
| AT5G64300 | 0           | 1           | 0           | 1          |
| AT5G64310 | 1           | 1           | 0           | 1          |
| AT5G64340 | 0           | 1           | 0           | 1          |
| AT5G64341 | 0           | 1           | 0           | 1          |

Appendix Table S4

| Name      | PIF3_target | PIF4_target | PIF5_target | PIF_target |
|-----------|-------------|-------------|-------------|------------|
| AT5G64342 | 0           | 1           | 0           | 1          |
| AT5G64343 | 0           | 1           | 0           | 1          |
| AT5G64410 | 0           | 1           | 0           | 1          |
| AT5G64430 | 0           | 1           | 0           | 1          |
| AT5G64440 | 0           | 1           | 0           | 1          |
| AT5G64530 | 1           | 0           | 0           | 1          |
| AT5G64610 | 0           | 1           | 0           | 1          |
| AT5G64620 | 0           | 1           | 0           | 1          |
| AT5G64650 | 0           | 1           | 0           | 1          |
| AT5G64660 | 0           | 1           | 0           | 1          |
| AT5G64740 | 0           | 1           | 0           | 1          |
| AT5G64750 | 0           | 1           | 1           | 1          |
| AT5G64800 | 0           | 1           | 0           | 1          |
| AT5G64810 | 0           | 1           | 0           | 1          |
| AT5G64860 | 0           | 1           | 0           | 1          |
| AT5G64870 | 0           | 1           | 0           | 1          |
| AT5G65140 | 0           | 1           | 0           | 1          |
| AT5G65158 | 0           | 1           | 0           | 1          |
| AT5G65280 | 0           | 1           | 0           | 1          |
| AT5G65290 | 0           | 1           | 0           | 1          |
| AT5G65300 | 1           | 1           | 1           | 1          |
| AT5G65305 | 1           | 1           | 0           | 1          |
| AT5G65310 | 0           | 1           | 0           | 1          |
| AT5G65320 | 0           | 1           | 0           | 1          |
| AT5G65340 | 0           | 1           | 0           | 1          |
| AT5G65350 | 0           | 1           | 0           | 1          |
| AT5G65380 | 0           | 1           | 0           | 1          |
| AT5G65390 | 0           | 1           | 1           | 1          |
| AT5G65400 | 0           | 1           | 1           | 1          |
| AT5G65430 | 0           | 1           | 0           | 1          |
| AT5G65440 | 0           | 1           | 0           | 1          |
| AT5G65460 | 1           | 1           | 0           | 1          |
| AT5G65470 | 1           | 1           | 1           | 1          |
| AT5G65630 | 0           | 1           | 0           | 1          |
| AT5G65640 | 1           | 1           | 0           | 1          |
| AT5G65650 | 0           | 1           | 0           | 1          |
| AT5G65660 | 0           | 1           | 0           | 1          |
| AT5G65670 | 0           | 1           | 1           | 1          |
| AT5G65683 | 0           | 1           | 0           | 1          |
| AT5G65690 | 0           | 1           | 0           | 1          |
| AT5G65700 | 0           | 1           | 0           | 1          |
| AT5G65710 | 0           | 1           | 0           | 1          |
| AT5G65790 | 0           | 1           | 0           | 1          |
| AT5G65800 | 0           | 1           | 1           | 1          |
| AT5G65810 | 0           | 1           | 0           | 1          |
| AT5G65890 | 0           | 1           | 0           | 1          |
| AT5G65920 | 0           | 1           | 0           | 1          |
| AT5G65925 | 0           | 1           | 0           | 1          |
| AT5G65980 | 0           | 1           | 0           | 1          |
| AT5G65990 | 0           | 1           | 0           | 1          |
| AT5G66050 | 0           | 1           | 0           | 1          |



Appendix Table S4

| Name      | PIF3_target | PIF4_target | PIF5_target | PIF_target |
|-----------|-------------|-------------|-------------|------------|
| AT5G66052 | 0           | 1           | 0           | 1          |
| AT5G66080 | 0           | 1           | 1           | 1          |
| AT5G66090 | 0           | 1           | 1           | 1          |
| AT5G66100 | 0           | 1           | 0           | 1          |
| AT5G66110 | 0           | 1           | 0           | 1          |
| AT5G66120 | 0           | 1           | 0           | 1          |
| AT5G66130 | 0           | 1           | 0           | 1          |
| AT5G66160 | 0           | 1           | 0           | 1          |
| AT5G66210 | 0           | 0           | 1           | 1          |
| AT5G66211 | 0           | 1           | 1           | 1          |
| AT5G66230 | 0           | 1           | 0           | 1          |
| AT5G66240 | 0           | 1           | 0           | 1          |
| AT5G66290 | 0           | 1           | 0           | 1          |
| AT5G66300 | 0           | 1           | 0           | 1          |
| AT5G66310 | 0           | 1           | 1           | 1          |
| AT5G66320 | 1           | 1           | 0           | 1          |
| AT5G66330 | 0           | 1           | 0           | 1          |
| AT5G66340 | 0           | 1           | 0           | 1          |
| AT5G66460 | 0           | 1           | 0           | 1          |
| AT5G66470 | 0           | 1           | 0           | 1          |
| AT5G66568 | 0           | 1           | 0           | 1          |
| AT5G66570 | 0           | 1           | 0           | 1          |
| AT5G66580 | 1           | 1           | 1           | 1          |
| AT5G66590 | 1           | 1           | 1           | 1          |
| AT5G66631 | 0           | 1           | 1           | 1          |
| AT5G66640 | 0           | 1           | 1           | 1          |
| AT5G66675 | 0           | 0           | 1           | 1          |
| AT5G66690 | 0           | 1           | 0           | 1          |
| AT5G66700 | 1           | 1           | 0           | 1          |
| AT5G66755 | 0           | 1           | 0           | 1          |
| AT5G66760 | 0           | 1           | 0           | 1          |
| AT5G66870 | 0           | 1           | 0           | 1          |
| AT5G66880 | 0           | 1           | 0           | 1          |
| AT5G66910 | 0           | 1           | 0           | 1          |
| AT5G66920 | 0           | 1           | 0           | 1          |
| AT5G67020 | 0           | 1           | 0           | 1          |
| AT5G67030 | 0           | 1           | 0           | 1          |
| AT5G67050 | 0           | 1           | 0           | 1          |
| AT5G67060 | 0           | 1           | 0           | 1          |
| AT5G67180 | 0           | 1           | 0           | 1          |
| AT5G67190 | 0           | 1           | 1           | 1          |
| AT5G67290 | 0           | 1           | 1           | 1          |
| AT5G67300 | 0           | 1           | 1           | 1          |
| AT5G67310 | 0           | 1           | 0           | 1          |
| AT5G67360 | 0           | 1           | 1           | 1          |
| AT5G67370 | 0           | 1           | 0           | 1          |
| AT5G67385 | 0           | 1           | 0           | 1          |
| AT5G67390 | 0           | 1           | 0           | 1          |
| AT5G67400 | 0           | 1           | 0           | 1          |
| AT5G67411 | 1           | 1           | 1           | 1          |
| AT5G67420 | 0           | 1           | 1           | 1          |

Appendix Table S4

| <b>Name</b> | <b>PIF3_target</b> | <b>PIF4_target</b> | <b>PIF5_target</b> | <b>PIF_target</b> |
|-------------|--------------------|--------------------|--------------------|-------------------|
| AT5G67470   | 0                  | 1                  | 0                  | 1                 |
| AT5G67480   | 0                  | 1                  | 0                  | 1                 |

**Appendix Table S5.** List of primers used in this study.

| Primer Name    | Sequence                                                |
|----------------|---------------------------------------------------------|
| <b>Cloning</b> |                                                         |
| BES1topof      | CACCATGACGTCTGACGGAGCAAC                                |
| BES1-R         | ACCCGGGCAACTATGAGCTTTACCATTTC                           |
| PIF4YFPf       | CACCATGGAACACCAAGGTTGG                                  |
| PIF4YFPPr      | TCCGTGGTCCAAACGAGAACCGTC                                |
| APBPIF4r       | GCTCTAGAGGCCACAAAAGGAAGAGTAG                            |
| PIF4sinAPBf    | CACCATGCTTGAAGATCAAGAACTGTC                             |
| AtPIF4Del3f    | CACCGGATCAAACCGAAGGAGTCG                                |
| AtPIF4Del4f    | CACCGTGATGTGGATGGGGAGTGG                                |
| BES1DEL2f      | CACCATGGCTGGATCATCTTCTCGAGC                             |
| BES1del3r      | CAAAGAAGTCATTGACTGTTTAGC                                |
| BES1del4f      | CACCATGGCTGCTAAACAGTCAATG                               |
| BES1delNr      | AGCCATGTCACCAGGTAGAG                                    |
| <b>EMSA</b>    |                                                         |
| BiotF          | GATCCTCTCGCGTAC                                         |
| BiotR          | TACGCATACGCTACG                                         |
| pDWF4Fragment  | GATCCTCTCGCGTACATACTAGCTACGTGCGCCACTAGATCGTAGCGTATGCGTA |
| pPIL1Fragment  | GATCCTCTCGCGTACTCTTTCCGCTCACGTGGGCCTTTTGCGTAGCGTATGCGTA |
| pPRE5Fragment  | GATCCTCTCGCGTACTCAAGGTCATCACATGGTATTGCCTCGTAGCGTATGCGTA |
| <b>PBM</b>     |                                                         |
| BES.COLA.2F    | CCATAGCTCATGAAAATCGAAG                                  |
| BES.COLA.2R    | CTCAAGGCGATTAAGTTGGGTA                                  |
| PIF4-1F        | TCATATGGAACACCAAGGTTGGAGTTTTGAGGAGAATTATAGTTTTGT        |
| PIF4-1R        | AGAATTCAAGCCTCCCCCGCCTCCGTGGTCCAAACGAGAACC              |
| PIF4.COLA.2F   | TAATACGACTCACTATAGGG                                    |
| PIF4.COLA.2R   | CGATCCTAGGCAGCAGCCAACCTCA                               |
| <b>qPCR</b>    |                                                         |
| PP2A-F         | TAACGTGGCCAAAATGATGC                                    |
| PP2A-R         | GTTCTCCACAACCGCTTGGT                                    |
| XTR7-F         | TGGCGACTGTTCTTCTTGTG                                    |
| XTR7-R         | TCCTCCGTTGAAGATTTTGC                                    |
| PRE5-F         | TGCTTCGAGGATCTCCGATGACCA                                |
| PRE5-R         | GCCGTTTCGTGAATCTCCGGCA                                  |
| IAA19-F        | GAGCTGAGATTGGGGCTTC                                     |
| IAA19-R        | CCGACGACGTCATATTCATCT                                   |
| CPD-F          | CACCACTTACCGCAAAGCCA                                    |
| CPD-R          | AATCCATCATCCGCCGCAAG                                    |
| DWF4-F         | CGACGTGGGGAAACAACACTAC                                  |
| DWF4-R         | CTGAACCAGCACATAGCCTTG                                   |
| Br6ox2-F       | GACCTGACGAACCGCTCAC                                     |

|                  |                                 |
|------------------|---------------------------------|
| Br6ox2-R         | GAAGGAAGCTTGAGACTTCCG           |
| BES-F            | GAACCTGTTATGTCATGTCGG           |
| BES-R            | CTCACTGGTACAATGAATATCG          |
| BZR1-F           | CAACTAGGCAAACCCAAATGG           |
| BZR1-R           | CATGGAGAAGGCTTTGGGCAG           |
| qGFP-F           | GTCCGCCCTGAGCAAAGA              |
| qGFP-R           | TCCAGCAGGACCATGTGATC            |
| BES1-S-qPCR-F    | AGCACTAACTTCTCACTCATTCTTC       |
| BES1-S-qPCR-R    | CGTCATCTTCTTCCTTCAACTCTC        |
| BES1-L-qPCR-F    | CGAAACCACACTGTAAGTTACG          |
| BES1-L-qPCR-R    | AAGCAAAAAGAATTCACCGTT           |
| Luciferase assay |                                 |
| pPIL1-1F         | CACCGTGGTCTCATGAGTTCAGGCG       |
| pPIL1-1R         | TTGAAGTAAACTGAACAAAGC           |
| pDWF4-F          | CACCGAATTACCGGTTGTTATGTAAATATAG |
| pDWF4-R          | TGGAGCTAGTTTCTCTCTCTCTCACT      |
